# Supplementary material for: Capping protein regulates endosomal trafficking by controlling F-actin density around endocytic vesicles and recruiting RAB5 effectors
Source: eLife. 2021 Nov 19;10:e65910. doi: 10.7554/eLife.65910 (PMC8654373; doi:10.7554/eLife.65910)
Supplement: Figure 1—figure supplement 1—source data 2. [file elife-65910-fig1-figsupp1-data2.xlsx]

## Sheet: Sheet1
	Figure S1E							Figure S1C
	Mander‘s Coefficients (with CAPZB)
								DP_X	DP_Y
	RAB5	LAMP1	RAB7	RAB11	RAB4			0.083333	41.0082
	0.461	0.147	0.181	0.125	0.202			0.1	41.0025
	0.48	0.205	0.196	0.202	0.175			0.116667	40.9997
	0.426	0.16	0.224	0.142	0.23			0.133333	40.9984
	0.537	0.132	0.164	0.132	0.214			0.15	40.996
	0.496	0.107	0.207	0.175	0.124			0.166667	40.995
	0.596	0.111	0.328	0.17	0.146			0.183333	40.9934
	0.442	0.135	0.23	0.229	0.185			0.2	40.9908
	0.387	0.181	0.226	0.172	0.144			0.216667	40.9924
	0.474	0.154	0.35	0.188	0.119			0.233333	40.9945
	0.521	0.101	0.309	0.165	0.209			0.25	40.9951
								0.266667	40.996
								0.283333	40.9971
								0.3	40.9971
								0.316667	40.9982
								0.333333	41.0002
								0.35	41.0011
								0.366667	41.0038
								0.383333	41.0067
								0.4	41.0097
								0.416667	41.0122
								0.433333	41.0165
								0.45	41.0175
								0.466667	41.0178
								0.483333	41.0183
								0.5	41.0198
								0.516667	41.0214
								0.533333	41.0221
								0.55	41.0219
								0.566667	41.0207
								0.583333	41.0183
								0.6	41.018
								0.616667	41.019
								0.633333	41.0178
								0.65	41.0123
								0.666667	41.0092
								0.683333	41.0073
								0.7	41.0062
								0.716667	41.005
								0.733333	40.999
								0.75	40.9956
								0.766667	40.994
								0.783333	40.9882
								0.8	40.9845
								0.816667	40.985
								0.833333	40.9862
								0.85	40.987
								0.866667	40.9869
								0.883333	40.9885
								0.9	40.9917
								0.916667	40.9908
								0.933333	40.99
								0.95	40.9916
								0.966667	40.9918
								0.983333	40.9913
								1	40.9988
								1.01667	41.0038
								1.03333	40.9953
								1.05	40.9919
								1.06667	40.9929
								1.08333	40.9932
								1.1	40.9941
								1.11667	40.9947
								1.13333	40.9945
								1.15	40.9938
								1.16667	40.9928
								1.18333	40.9926
								1.2	40.992
								1.21667	40.9911
								1.23333	40.9898
								1.25	40.9887
								1.26667	40.9881
								1.28333	40.9883
								1.3	40.9872
								1.31667	40.9857
								1.33333	40.9839
								1.35	40.9822
								1.36667	40.9806
								1.38333	40.9798
								1.4	40.9748
								1.41667	40.9747
								1.43333	40.9914
								1.45	41.0082
								1.46667	41.0053
								1.48333	41.003
								1.5	41.0005
								1.51667	40.9944
								1.53333	40.9892
								1.55	40.986
								1.56667	40.9837
								1.58333	40.9779
								1.6	40.9742
								1.61667	40.9726
								1.63333	40.9712
								1.65	40.97
								1.66667	40.9682
								1.68333	40.9669
								1.7	40.9663
								1.71667	40.965
								1.73333	40.9624
								1.75	40.9617
								1.76667	40.9614
								1.78333	40.9611
								1.8	40.9614
								1.81667	40.9616
								1.83333	40.9625
								1.85	40.9611
								1.86667	40.9613
								1.88333	40.9626
								1.9	40.9632
								1.91667	40.9628
								1.93333	40.9627
								1.95	40.9624
								1.96667	40.9624
								1.98333	40.9626
								2	40.9621
								2.01667	40.9607
								2.03333	40.9584
								2.05	40.9575
								2.06667	40.9575
								2.08333	40.9567
								2.1	40.956
								2.11667	40.9567
								2.13333	40.9572
								2.15	40.9569
								2.16667	40.9557
								2.18333	40.9534
								2.2	40.9511
								2.21667	40.9499
								2.23333	40.9487
								2.25	40.948
								2.26667	40.9473
								2.28333	40.9464
								2.3	40.9452
								2.31667	40.9446
								2.33333	40.9442
								2.35	40.9449
								2.36667	40.9444
								2.38333	40.9443
								2.4	40.9433
								2.41667	40.9425
								2.43333	40.9425
								2.45	40.9417
								2.46667	40.9408
								2.48333	40.9401
								2.5	40.9398
								2.51667	40.9407
								2.53333	40.9416
								2.55	40.9418
								2.56667	40.9421
								2.58333	40.9419
								2.6	40.9417
								2.61667	40.9402
								2.63333	40.9398
								2.65	40.9397
								2.66667	40.9396
								2.68333	40.9391
								2.7	40.9392
								2.71667	40.9395
								2.73333	40.9402
								2.75	40.9404
								2.76667	40.9404
								2.78333	40.9406
								2.8	40.9403
								2.81667	40.9409
								2.83333	40.9405
								2.85	40.9396
								2.86667	40.9395
								2.88333	40.9392
								2.9	40.9381
								2.91667	40.9373
								2.93333	40.9367
								2.95	40.9372
								2.96667	40.9371
								2.98333	40.9365
								3	40.9355
								3.01667	40.9349
								3.03333	40.9337
								3.05	40.9328
								3.06667	40.9321
								3.08333	40.9308
								3.1	40.9301
								3.11667	40.9295
								3.13333	40.9292
								3.15	40.9296
								3.16667	40.9302
								3.18333	40.9307
								3.2	40.9302
								3.21667	40.9292
								3.23333	40.929
								3.25	40.9286
								3.26667	40.9289
								3.28333	40.9292
								3.3	40.9293
								3.31667	40.9292
								3.33333	40.9293
								3.35	40.9298
								3.36667	40.9289
								3.38333	40.9288
								3.4	40.9278
								3.41667	40.9263
								3.43333	40.9235
								3.45	40.9233
								3.46667	40.925
								3.48333	40.9234
								3.5	40.9173
								3.51667	40.9161
								3.53333	40.9212
								3.55	40.771
								3.56667	40.5794
								3.58333	40.4475
								3.6	40.3992
								3.61667	40.4827
								3.63333	40.5847
								3.65	40.6821
								3.66667	40.7597
								3.68333	40.8023
								3.7	40.809
								3.71667	40.8068
								3.73333	40.809
								3.75	40.8185
								3.76667	40.8422
								3.78333	40.8692
								3.8	40.8942
								3.81667	40.9048
								3.83333	40.9102
								3.85	40.9104
								3.86667	40.9088
								3.88333	40.9071
								3.9	40.9072
								3.91667	40.908
								3.93333	40.9099
								3.95	40.9109
								3.96667	40.9117
								3.98333	40.9121
								4	40.9128
								4.01667	40.9132
								4.03333	40.9135
								4.05	40.9134
								4.06667	40.9143
								4.08333	40.9153
								4.1	40.9165
								4.11667	40.9183
								4.13333	40.9194
								4.15	40.9203
								4.16667	40.9206
								4.18333	40.9207
								4.2	40.921
								4.21667	40.9215
								4.23333	40.9215
								4.25	40.9212
								4.26667	40.9214
								4.28333	40.9214
								4.3	40.9225
								4.31667	40.9231
								4.33333	40.9231
								4.35	40.9229
								4.36667	40.9225
								4.38333	40.9222
								4.4	40.922
								4.41667	40.9218
								4.43333	40.9207
								4.45	40.9195
								4.46667	40.9186
								4.48333	40.9181
								4.5	40.9175
								4.51667	40.9175
								4.53333	40.9173
								4.55	40.9169
								4.56667	40.9168
								4.58333	40.9167
								4.6	40.916
								4.61667	40.9153
								4.63333	40.9139
								4.65	40.9119
								4.66667	40.9111
								4.68333	40.9101
								4.7	40.9097
								4.71667	40.909
								4.73333	40.9074
								4.75	40.9059
								4.76667	40.9051
								4.78333	40.9042
								4.8	40.9033
								4.81667	40.9029
								4.83333	40.9024
								4.85	40.9011
								4.86667	40.9006
								4.88333	40.8995
								4.9	40.8972
								4.91667	40.8952
								4.93333	40.8939
								4.95	40.8928
								4.96667	40.8911
								4.98333	40.8903
								5	40.89
								5.01667	40.8895
								5.03333	40.8883
								5.05	40.8877
								5.06667	40.8884
								5.08333	40.8884
								5.1	40.8886
								5.11667	40.8888
								5.13333	40.8886
								5.15	40.8883
								5.16667	40.889
								5.18333	40.8896
								5.2	40.8899
								5.21667	40.8894
								5.23333	40.8893
								5.25	40.8889
								5.26667	40.8882
								5.28333	40.8886
								5.3	40.8903
								5.31667	40.8921
								5.33333	40.8921
								5.35	40.8919
								5.36667	40.8916
								5.38333	40.8914
								5.4	40.8913
								5.41667	40.8902
								5.43333	40.889
								5.45	40.8885
								5.46667	40.8886
								5.48333	40.8881
								5.5	40.8884
								5.51667	40.888
								5.53333	40.8874
								5.55	40.8875
								5.56667	40.8879
								5.58333	40.8883
								5.6	40.8891
								5.61667	40.889
								5.63333	40.8874
								5.65	40.8862
								5.66667	40.8854
								5.68333	40.885
								5.7	40.8844
								5.71667	40.8837
								5.73333	40.8831
								5.75	40.8826
								5.76667	40.8826
								5.78333	40.8822
								5.8	40.8814
								5.81667	40.8804
								5.83333	40.8795
								5.85	40.8789
								5.86667	40.8782
								5.88333	40.8776
								5.9	40.8766
								5.91667	40.8763
								5.93333	40.8758
								5.95	40.8751
								5.96667	40.8738
								5.98333	40.871
								6	40.8681
								6.01667	40.8783
								6.03333	40.8443
								6.05	40.667
								6.06667	40.5407
								6.08333	40.4392
								6.1	40.3902
								6.11667	40.4596
								6.13333	40.552
								6.15	40.6509
								6.16667	40.7073
								6.18333	40.7611
								6.2	40.7701
								6.21667	40.7726
								6.23333	40.7793
								6.25	40.7985
								6.26667	40.8192
								6.28333	40.8436
								6.3	40.8729
								6.31667	40.896
								6.33333	40.9012
								6.35	40.8995
								6.36667	40.8972
								6.38333	40.8965
								6.4	40.8958
								6.41667	40.8974
								6.43333	40.8979
								6.45	40.897
								6.46667	40.8968
								6.48333	40.8965
								6.5	40.8954
								6.51667	40.8941
								6.53333	40.8938
								6.55	40.8942
								6.56667	40.8942
								6.58333	40.8944
								6.6	40.8949
								6.61667	40.896
								6.63333	40.8966
								6.65	40.8973
								6.66667	40.8974
								6.68333	40.8967
								6.7	40.8953
								6.71667	40.8938
								6.73333	40.8931
								6.75	40.8931
								6.76667	40.8931
								6.78333	40.8926
								6.8	40.8923
								6.81667	40.892
								6.83333	40.891
								6.85	40.8895
								6.86667	40.8884
								6.88333	40.8872
								6.9	40.8862
								6.91667	40.8855
								6.93333	40.8843
								6.95	40.8818
								6.96667	40.8792
								6.98333	40.8774
								7	40.8759
								7.01667	40.8741
								7.03333	40.873
								7.05	40.8723
								7.06667	40.8713
								7.08333	40.8702
								7.1	40.8696
								7.11667	40.8687
								7.13333	40.8673
								7.15	40.8668
								7.16667	40.8668
								7.18333	40.8671
								7.2	40.867
								7.21667	40.8668
								7.23333	40.8661
								7.25	40.8656
								7.26667	40.8653
								7.28333	40.8648
								7.3	40.8641
								7.31667	40.8638
								7.33333	40.864
								7.35	40.8647
								7.36667	40.8646
								7.38333	40.8645
								7.4	40.864
								7.41667	40.8631
								7.43333	40.8636
								7.45	40.8641
								7.46667	40.8644
								7.48333	40.8648
								7.5	40.8648
								7.51667	40.864
								7.53333	40.8632
								7.55	40.863
								7.56667	40.8631
								7.58333	40.8637
								7.6	40.8638
								7.61667	40.8644
								7.63333	40.8655
								7.65	40.866
								7.66667	40.8663
								7.68333	40.8672
								7.7	40.8684
								7.71667	40.8694
								7.73333	40.8704
								7.75	40.8707
								7.76667	40.8711
								7.78333	40.8711
								7.8	40.871
								7.81667	40.8707
								7.83333	40.8714
								7.85	40.8725
								7.86667	40.8724
								7.88333	40.8726
								7.9	40.8728
								7.91667	40.8718
								7.93333	40.8713
								7.95	40.8711
								7.96667	40.8714
								7.98333	40.8723
								8	40.8726
								8.01667	40.8719
								8.03333	40.871
								8.05	40.8706
								8.06667	40.8707
								8.08333	40.8696
								8.1	40.8687
								8.11667	40.8686
								8.13333	40.8685
								8.15	40.8676
								8.16667	40.8668
								8.18333	40.8665
								8.2	40.8675
								8.21667	40.8681
								8.23333	40.8684
								8.25	40.8685
								8.26667	40.8686
								8.28333	40.8686
								8.3	40.8679
								8.31667	40.8669
								8.33333	40.8661
								8.35	40.8657
								8.36667	40.8653
								8.38333	40.8652
								8.4	40.8661
								8.41667	40.8672
								8.43333	40.8672
								8.45	40.8645
								8.46667	40.863
								8.48333	40.8631
								8.5	40.8632
								8.51667	40.8786
								8.53333	40.8465
								8.55	40.6828
								8.56667	40.5235
								8.58333	40.3891
								8.6	40.3171
								8.61667	40.4035
								8.63333	40.5013
								8.65	40.6122
								8.66667	40.6988
								8.68333	40.7308
								8.7	40.7562
								8.71667	40.7718
								8.73333	40.7862
								8.75	40.8152
								8.76667	40.8371
								8.78333	40.8576
								8.8	40.8725
								8.81667	40.8798
								8.83333	40.8866
								8.85	40.8908
								8.86667	40.8914
								8.88333	40.891
								8.9	40.8918
								8.91667	40.893
								8.93333	40.8962
								8.95	40.8991
								8.96667	40.898
								8.98333	40.8963
								9	40.8956
								9.01667	40.895
								9.03333	40.894
								9.05	40.8922
								9.06667	40.8903
								9.08333	40.888
								9.1	40.8867
								9.11667	40.8856
								9.13333	40.8855
								9.15	40.8855
								9.16667	40.8847
								9.18333	40.8842
								9.2	40.8836
								9.21667	40.8827
								9.23333	40.8817
								9.25	40.8805
								9.26667	40.8801
								9.28333	40.8798
								9.3	40.8793
								9.31667	40.8789
								9.33333	40.8778
								9.35	40.877
								9.36667	40.8766
								9.38333	40.8764
								9.4	40.8759
								9.41667	40.8754
								9.43333	40.8747
								9.45	40.8739
								9.46667	40.873
								9.48333	40.8723
								9.5	40.8723
								9.51667	40.8722
								9.53333	40.8712
								9.55	40.8697
								9.56667	40.8686
								9.58333	40.8679
								9.6	40.8668
								9.61667	40.8657
								9.63333	40.8651
								9.65	40.8656
								9.66667	40.8664
								9.68333	40.8666
								9.7	40.8661
								9.71667	40.8642
								9.73333	40.8633
								9.75	40.8628
								9.76667	40.8627
								9.78333	40.8615
								9.8	40.8597
								9.81667	40.8594
								9.83333	40.8588
								9.85	40.8589
								9.86667	40.8597
								9.88333	40.8611
								9.9	40.8616
								9.91667	40.8614
								9.93333	40.862
								9.95	40.8624
								9.96667	40.8634
								9.98333	40.8626
								10	40.8617
								10.0167	40.8621
								10.0333	40.8644
								10.05	40.8662
								10.0667	40.8673
								10.0833	40.8681
								10.1	40.868
								10.1167	40.8679
								10.1333	40.8687
								10.15	40.8692
								10.1667	40.8691
								10.1833	40.8682
								10.2	40.8687
								10.2167	40.8693
								10.2333	40.8691
								10.25	40.8691
								10.2667	40.8694
								10.2833	40.8691
								10.3	40.8689
								10.3167	40.8694
								10.3333	40.8695
								10.35	40.8695
								10.3667	40.8698
								10.3833	40.87
								10.4	40.8692
								10.4167	40.8693
								10.4333	40.87
								10.45	40.8708
								10.4667	40.8707
								10.4833	40.8708
								10.5	40.8706
								10.5167	40.871
								10.5333	40.8713
								10.55	40.8715
								10.5667	40.8709
								10.5833	40.8713
								10.6	40.8716
								10.6167	40.8717
								10.6333	40.8713
								10.65	40.871
								10.6667	40.8697
								10.6833	40.8691
								10.7	40.868
								10.7167	40.8677
								10.7333	40.8686
								10.75	40.87
								10.7667	40.8704
								10.7833	40.8696
								10.8	40.8684
								10.8167	40.8676
								10.8333	40.8679
								10.85	40.869
								10.8667	40.8679
								10.8833	40.8677
								10.9	40.8672
								10.9167	40.8672
								10.9333	40.8698
								10.95	40.8698
								10.9667	40.8646
								10.9833	40.8615
								11	40.8684
								11.0167	40.8719
								11.0333	40.8642
								11.05	40.7079
								11.0667	40.5478
								11.0833	40.4235
								11.1	40.3228
								11.1167	40.3603
								11.1333	40.4666
								11.15	40.5858
								11.1667	40.6651
								11.1833	40.7164
								11.2	40.7399
								11.2167	40.8642
								11.2333	41.1597
								11.25	41.402
								11.2667	41.5113
								11.2833	41.528
								11.3	41.4819
								11.3167	41.3879
								11.3333	41.2796
								11.35	41.1663
								11.3667	41.0808
								11.3833	41.0185
								11.4	40.9475
								11.4167	40.8996
								11.4333	40.8562
								11.45	40.8176
								11.4667	40.8027
								11.4833	40.7877
								11.5	40.7717
								11.5167	40.7621
								11.5333	40.7565
								11.55	40.7473
								11.5667	40.7366
								11.5833	40.7265
								11.6	40.7202
								11.6167	40.716
								11.6333	40.7076
								11.65	40.7031
								11.6667	40.6988
								11.6833	40.6946
								11.7	40.6927
								11.7167	40.6892
								11.7333	40.6856
								11.75	40.6838
								11.7667	40.6831
								11.7833	40.681
								11.8	40.6793
								11.8167	40.6782
								11.8333	40.6763
								11.85	40.6746
								11.8667	40.6723
								11.8833	40.6711
								11.9	40.669
								11.9167	40.6656
								11.9333	40.6633
								11.95	40.6609
								11.9667	40.6579
								11.9833	40.654
								12	40.6524
								12.0167	40.6532
								12.0333	40.6539
								12.05	40.655
								12.0667	40.6543
								12.0833	40.6527
								12.1	40.6527
								12.1167	40.653
								12.1333	40.6535
								12.15	40.6534
								12.1667	40.6534
								12.1833	40.6534
								12.2	40.6528
								12.2167	40.6519
								12.2333	40.6496
								12.25	40.6465
								12.2667	40.6438
								12.2833	40.6422
								12.3	40.6421
								12.3167	40.6424
								12.3333	40.6415
								12.35	40.6412
								12.3667	40.6425
								12.3833	40.6425
								12.4	40.6428
								12.4167	40.6432
								12.4333	40.6428
								12.45	40.642
								12.4667	40.6428
								12.4833	40.6435
								12.5	40.6448
								12.5167	40.6449
								12.5333	40.6445
								12.55	40.6452
								12.5667	40.6471
								12.5833	40.6477
								12.6	40.6489
								12.6167	40.6484
								12.6333	40.6478
								12.65	40.6471
								12.6667	40.648
								12.6833	40.6493
								12.7	40.6495
								12.7167	40.6498
								12.7333	40.65
								12.75	40.6492
								12.7667	40.6471
								12.7833	40.6439
								12.8	40.6414
								12.8167	40.6401
								12.8333	40.6406
								12.85	40.6413
								12.8667	40.6414
								12.8833	40.64
								12.9	40.6382
								12.9167	40.6376
								12.9333	40.6381
								12.95	40.6384
								12.9667	40.6393
								12.9833	40.6406
								13	40.6426
								13.0167	40.6423
								13.0333	40.6422
								13.05	40.6414
								13.0667	40.6401
								13.0833	40.6387
								13.1	40.6386
								13.1167	40.6382
								13.1333	40.6362
								13.15	40.6343
								13.1667	40.6328
								13.1833	40.6318
								13.2	40.6322
								13.2167	40.6328
								13.2333	40.6311
								13.25	40.631
								13.2667	40.6318
								13.2833	40.6335
								13.3	40.6339
								13.3167	40.6347
								13.3333	40.6354
								13.35	40.634
								13.3667	40.6333
								13.3833	40.6328
								13.4	40.6323
								13.4167	40.6324
								13.4333	40.6328
								13.45	40.6311
								13.4667	40.6302
								13.4833	40.6338
								13.5	40.6393
								13.5167	40.6361
								13.5333	40.6093
								13.55	40.4164
								13.5667	40.2239
								13.5833	40.075
								13.6	40.0082
								13.6167	40.0914
								13.6333	40.2538
								13.65	40.3862
								13.6667	40.4842
								13.6833	40.5423
								13.7	40.5827
								13.7167	40.6029
								13.7333	40.6065
								13.75	40.6204
								13.7667	40.6306
								13.7833	40.6428
								13.8	40.6498
								13.8167	40.6555
								13.8333	40.6591
								13.85	40.6607
								13.8667	40.6619
								13.8833	40.6622
								13.9	40.6622
								13.9167	40.6637
								13.9333	40.6671
								13.95	40.6686
								13.9667	40.6695
								13.9833	40.6698
								14	40.6697
								14.0167	40.6689
								14.0333	40.6682
								14.05	40.6671
								14.0667	40.6659
								14.0833	40.6658
								14.1	40.666
								14.1167	40.6652
								14.1333	40.6641
								14.15	40.6629
								14.1667	40.6616
								14.1833	40.66
								14.2	40.6591
								14.2167	40.6582
								14.2333	40.6568
								14.25	40.6546
								14.2667	40.6531
								14.2833	40.652
								14.3	40.652
								14.3167	40.6513
								14.3333	40.6508
								14.35	40.6506
								14.3667	40.651
								14.3833	40.6511
								14.4	40.6499
								14.4167	40.6486
								14.4333	40.6498
								14.45	40.6531
								14.4667	40.655
								14.4833	40.6569
								14.5	40.6594
								14.5167	40.6617
								14.5333	40.6642
								14.55	40.6671
								14.5667	40.6696
								14.5833	40.6713
								14.6	40.6723
								14.6167	40.6732
								14.6333	40.6754
								14.65	40.6779
								14.6667	40.6787
								14.6833	40.6798
								14.7	40.6813
								14.7167	40.6814
								14.7333	40.6809
								14.75	40.681
								14.7667	40.6811
								14.7833	40.6812
								14.8	40.681
								14.8167	40.6808
								14.8333	40.6817
								14.85	40.6822
								14.8667	40.6827
								14.8833	40.683
								14.9	40.6833
								14.9167	40.6847
								14.9333	40.6858
								14.95	40.6859
								14.9667	40.6874
								14.9833	40.6892
								15	40.6904
								15.0167	40.6914
								15.0333	40.6922
								15.05	40.692
								15.0667	40.6913
								15.0833	40.6909
								15.1	40.691
								15.1167	40.6918
								15.1333	40.6921
								15.15	40.691
								15.1667	40.6897
								15.1833	40.6892
								15.2	40.688
								15.2167	40.6882
								15.2333	40.6877
								15.25	40.6875
								15.2667	40.6873
								15.2833	40.6878
								15.3	40.6889
								15.3167	40.6887
								15.3333	40.6893
								15.35	40.6892
								15.3667	40.6905
								15.3833	40.6934
								15.4	40.6954
								15.4167	40.6955
								15.4333	40.6947
								15.45	40.6944
								15.4667	40.6941
								15.4833	40.6941
								15.5	40.6931
								15.5167	40.6924
								15.5333	40.6917
								15.55	40.6913
								15.5667	40.6914
								15.5833	40.6896
								15.6	40.6893
								15.6167	40.6908
								15.6333	40.6931
								15.65	40.6956
								15.6667	40.6989
								15.6833	40.7016
								15.7	40.705
								15.7167	40.7085
								15.7333	40.7111
								15.75	40.7144
								15.7667	40.7173
								15.7833	40.7188
								15.8	40.7208
								15.8167	40.7227
								15.8333	40.7241
								15.85	40.7262
								15.8667	40.7272
								15.8833	40.7306
								15.9	40.7341
								15.9167	40.7387
								15.9333	40.745
								15.95	40.751
								15.9667	40.7585
								15.9833	40.7672
								16	40.772
								16.0167	40.7791
								16.0333	40.7764
								16.05	40.6097
								16.0667	40.4177
								16.0833	40.2806
								16.1	40.195
								16.1167	40.2622
								16.1333	40.3788
								16.15	40.4717
								16.1667	40.5863
								16.1833	40.6347
								16.2	40.68
								16.2167	40.6867
								16.2333	40.6959
								16.25	40.7044
								16.2667	40.6081
								16.2833	40.6473
								16.3	40.7615
								16.3167	40.8159
								16.3333	40.8349
								16.35	40.8437
								16.3667	40.8433
								16.3833	40.8352
								16.4	40.8275
								16.4167	40.8244
								16.4333	40.8224
								16.45	40.8184
								16.4667	40.8152
								16.4833	40.8145
								16.5	40.8134
								16.5167	40.8097
								16.5333	40.807
								16.55	40.8074
								16.5667	40.807
								16.5833	40.8053
								16.6	40.8051
								16.6167	40.8056
								16.6333	40.8061
								16.65	40.806
								16.6667	40.8059
								16.6833	40.8058
								16.7	40.8059
								16.7167	40.8071
								16.7333	40.8084
								16.75	40.8104
								16.7667	40.8112
								16.7833	40.8116
								16.8	40.8118
								16.8167	40.8127
								16.8333	40.8141
								16.85	40.8151
								16.8667	40.8154
								16.8833	40.8152
								16.9	40.8162
								16.9167	40.817
								16.9333	40.8178
								16.95	40.818
								16.9667	40.8182
								16.9833	40.8192
								17	40.82
								17.0167	40.8214
								17.0333	40.8237
								17.05	40.8253
								17.0667	40.8267
								17.0833	40.8278
								17.1	40.8298
								17.1167	40.8312
								17.1333	40.8321
								17.15	40.8335
								17.1667	40.8358
								17.1833	40.8384
								17.2	40.841
								17.2167	40.8447
								17.2333	40.8478
								17.25	40.8497
								17.2667	40.8519
								17.2833	40.8541
								17.3	40.8563
								17.3167	40.8579
								17.3333	40.86
								17.35	40.8612
								17.3667	40.8615
								17.3833	40.8611
								17.4	40.8612
								17.4167	40.8613
								17.4333	40.8607
								17.45	40.8601
								17.4667	40.8603
								17.4833	40.8601
								17.5	40.8599
								17.5167	40.8594
								17.5333	40.8584
								17.55	40.8565
								17.5667	40.855
								17.5833	40.8545
								17.6	40.8541
								17.6167	40.8531
								17.6333	40.8522
								17.65	40.8514
								17.6667	40.8513
								17.6833	40.8515
								17.7	40.8526
								17.7167	40.854
								17.7333	40.8544
								17.75	40.8545
								17.7667	40.8552
								17.7833	40.8556
								17.8	40.8554
								17.8167	40.8558
								17.8333	40.8567
								17.85	40.8572
								17.8667	40.8573
								17.8833	40.8571
								17.9	40.8563
								17.9167	40.8561
								17.9333	40.8558
								17.95	40.8561
								17.9667	40.8566
								17.9833	40.857
								18	40.8567
								18.0167	40.8561
								18.0333	40.8545
								18.05	40.853
								18.0667	40.852
								18.0833	40.8513
								18.1	40.8501
								18.1167	40.8489
								18.1333	40.8479
								18.15	40.8468
								18.1667	40.8455
								18.1833	40.8444
								18.2	40.8438
								18.2167	40.8446
								18.2333	40.8445
								18.25	40.8437
								18.2667	40.8437
								18.2833	40.8434
								18.3	40.8421
								18.3167	40.8421
								18.3333	40.8422
								18.35	40.8422
								18.3667	40.8429
								18.3833	40.8427
								18.4	40.8428
								18.4167	40.8437
								18.4333	40.8455
								18.45	40.8457
								18.4667	40.8445
								18.4833	40.8438
								18.5	40.8512
								18.5167	40.8481
								18.5333	40.8617
								18.55	40.7571
								18.5667	40.5395
								18.5833	40.3714
								18.6	40.2615
								18.6167	40.2776
								18.6333	40.4165
								18.65	40.5377
								18.6667	40.6462
								18.6833	40.6964
								18.7	40.7207
								18.7167	40.7376
								18.7333	40.7514
								18.75	40.7682
								18.7667	40.8012
								18.7833	40.8402
								18.8	40.8704
								18.8167	40.8908
								18.8333	40.9007
								18.85	40.8949
								18.8667	40.8914
								18.8833	40.888
								18.9	40.8842
								18.9167	40.8828
								18.9333	40.8791
								18.95	40.8749
								18.9667	40.872
								18.9833	40.8683
								19	40.8634
								19.0167	40.8614
								19.0333	40.8598
								19.05	40.8578
								19.0667	40.8564
								19.0833	40.8549
								19.1	40.853
								19.1167	40.8512
								19.1333	40.8499
								19.15	40.8481
								19.1667	40.8473
								19.1833	40.8473
								19.2	40.8481
								19.2167	40.8485
								19.2333	40.8488
								19.25	40.8495
								19.2667	40.8494
								19.2833	40.8496
								19.3	40.8494
								19.3167	40.8497
								19.3333	40.85
								19.35	40.8501
								19.3667	40.8504
								19.3833	40.8517
								19.4	40.8534
								19.4167	40.8542
								19.4333	40.8543
								19.45	40.8554
								19.4667	40.8563
								19.4833	40.8563
								19.5	40.8551
								19.5167	40.853
								19.5333	40.8516
								19.55	40.8507
								19.5667	40.8499
								19.5833	40.8498
								19.6	40.8496
								19.6167	40.8493
								19.6333	40.8489
								19.65	40.8483
								19.6667	40.8503
								19.6833	40.8517
								19.7	40.8504
								19.7167	40.85
								19.7333	40.8494
								19.75	40.8501
								19.7667	40.8507
								19.7833	40.8499
								19.8	40.8511
								19.8167	40.8533
								19.8333	40.853
								19.85	40.8524
								19.8667	40.8527
								19.8833	40.8536
								19.9	40.8546
								19.9167	40.8553
								19.9333	40.8549
								19.95	40.8541
								19.9667	40.8561
								19.9833	40.8565
								20	40.8543
								20.0167	40.8541
								20.0333	40.8534
								20.05	40.8514
								20.0667	40.8502
								20.0833	40.8488
								20.1	40.8498
								20.1167	40.8504
								20.1333	40.8497
								20.15	40.849
								20.1667	40.8489
								20.1833	40.8486
								20.2	40.8478
								20.2167	40.8463
								20.2333	40.8454
								20.25	40.8443
								20.2667	40.8436
								20.2833	40.8429
								20.3	40.8431
								20.3167	40.8445
								20.3333	40.8459
								20.35	40.8468
								20.3667	40.8481
								20.3833	40.8491
								20.4	40.8495
								20.4167	40.8496
								20.4333	40.8507
								20.45	40.8505
								20.4667	40.8504
								20.4833	40.8509
								20.5	40.8514
								20.5167	40.8512
								20.5333	40.851
								20.55	40.8508
								20.5667	40.8515
								20.5833	40.8511
								20.6	40.8498
								20.6167	40.8489
								20.6333	40.8485
								20.65	40.8477
								20.6667	40.847
								20.6833	40.8469
								20.7	40.8461
								20.7167	40.8452
								20.7333	40.8444
								20.75	40.8432
								20.7667	40.8424
								20.7833	40.842
								20.8	40.8412
								20.8167	40.8402
								20.8333	40.8401
								20.85	40.8402
								20.8667	40.8402
								20.8833	40.8395
								20.9	40.8402
								20.9167	40.8405
								20.9333	40.8398
								20.95	40.8387
								20.9667	40.8392
								20.9833	40.8393
								21	40.8411
								21.0167	40.8376
								21.0333	40.8529
								21.05	40.7266
								21.0667	40.5169
								21.0833	40.3727
								21.1	40.2658
								21.1167	40.2912
								21.1333	40.4306
								21.15	40.5566
								21.1667	40.6634
								21.1833	40.741
								21.2	40.7608
								21.2167	40.7591
								21.2333	40.762
								21.25	40.7676
								21.2667	40.7914
								21.2833	40.8344
								21.3	40.8712
								21.3167	40.886
								21.3333	40.8889
								21.35	40.8884
								21.3667	40.8857
								21.3833	40.8831
								21.4	40.8806
								21.4167	40.8766
								21.4333	40.8729
								21.45	40.8699
								21.4667	40.8671
								21.4833	40.8649
								21.5	40.862
								21.5167	40.86
								21.5333	40.8581
								21.55	40.855
								21.5667	40.8524
								21.5833	40.8504
								21.6	40.8487
								21.6167	40.8483
								21.6333	40.8471
								21.65	40.8461
								21.6667	40.8457
								21.6833	40.8455
								21.7	40.8463
								21.7167	40.8471
								21.7333	40.8471
								21.75	40.8482
								21.7667	40.8517
								21.7833	40.8543
								21.8	40.8551
								21.8167	40.8558
								21.8333	40.8562
								21.85	40.8566
								21.8667	40.8573
								21.8833	40.8598
								21.9	40.861
								21.9167	40.8609
								21.9333	40.8618
								21.95	40.8624
								21.9667	40.8625
								21.9833	40.8613
								22	40.8597
								22.0167	40.8591
								22.0333	40.8581
								22.05	40.8574
								22.0667	40.8559
								22.0833	40.853
								22.1	40.8502
								22.1167	40.8482
								22.1333	40.8473
								22.15	40.8465
								22.1667	40.8458
								22.1833	40.8453
								22.2	40.8446
								22.2167	40.8444
								22.2333	40.8443
								22.25	40.8437
								22.2667	40.8422
								22.2833	40.842
								22.3	40.8422
								22.3167	40.8427
								22.3333	40.8434
								22.35	40.8437
								22.3667	40.8439
								22.3833	40.844
								22.4	40.8443
								22.4167	40.8453
								22.4333	40.8464
								22.45	40.8465
								22.4667	40.8471
								22.4833	40.8481
								22.5	40.8486
								22.5167	40.8487
								22.5333	40.8492
								22.55	40.8497
								22.5667	40.8502
								22.5833	40.8513
								22.6	40.8521
								22.6167	40.8527
								22.6333	40.8529
								22.65	40.8525
								22.6667	40.8519
								22.6833	40.8523
								22.7	40.8529
								22.7167	40.8529
								22.7333	40.8528
								22.75	40.8527
								22.7667	40.8527
								22.7833	40.8535
								22.8	40.8531
								22.8167	40.8517
								22.8333	40.8516
								22.85	40.8516
								22.8667	40.8514
								22.8833	40.8509
								22.9	40.8502
								22.9167	40.8493
								22.9333	40.8484
								22.95	40.8478
								22.9667	40.8478
								22.9833	40.8487
								23	40.8494
								23.0167	40.8487
								23.0333	40.8477
								23.05	40.8468
								23.0667	40.8459
								23.0833	40.8454
								23.1	40.845
								23.1167	40.8447
								23.1333	40.8454
								23.15	40.8465
								23.1667	40.8476
								23.1833	40.8481
								23.2	40.8501
								23.2167	40.8511
								23.2333	40.8511
								23.25	40.8517
								23.2667	40.8522
								23.2833	40.8519
								23.3	40.8527
								23.3167	40.8543
								23.3333	40.8553
								23.35	40.8565
								23.3667	40.8585
								23.3833	40.8616
								23.4	40.8645
								23.4167	40.8651
								23.4333	40.8644
								23.45	40.8639
								23.4667	40.8669
								23.4833	40.8706
								23.5	40.8713
								23.5167	40.8743
								23.5333	40.8692
								23.55	40.7642
								23.5667	40.5386
								23.5833	40.3808
								23.6	40.2687
								23.6167	40.3095
								23.6333	40.4885
								23.65	40.6303
								23.6667	40.7244
								23.6833	40.7801
								23.7	40.792
								23.7167	40.7874
								23.7333	40.7838
								23.75	40.7804
								23.7667	40.8077
								23.7833	40.8488
								23.8	40.8697
								23.8167	40.8788
								23.8333	40.888
								23.85	40.8886
								23.8667	40.8854
								23.8833	40.8841
								23.9	40.881
								23.9167	40.8796
								23.9333	40.8782
								23.95	40.8768
								23.9667	40.8767
								23.9833	40.8762
								24	40.8729
								24.0167	40.87
								24.0333	40.8674
								24.05	40.8651
								24.0667	40.8635
								24.0833	40.862
								24.1	40.8607
								24.1167	40.8587
								24.1333	40.8583
								24.15	40.8571
								24.1667	40.8555
								24.1833	40.8549
								24.2	40.8557
								24.2167	40.8566
								24.2333	40.8567
								24.25	40.8563
								24.2667	40.8559
								24.2833	40.8554
								24.3	40.8574
								24.3167	40.8585
								24.3333	40.859
								24.35	40.8601
								24.3667	40.8606
								24.3833	40.8616
								24.4	40.8629
								24.4167	40.8643
								24.4333	40.8649
								24.45	40.8661
								24.4667	40.868
								24.4833	40.8688
								24.5	40.8682
								24.5167	40.8682
								24.5333	40.8679
								24.55	40.8679
								24.5667	40.8689
								24.5833	40.8692
								24.6	40.8693
								24.6167	40.8695
								24.6333	40.8702
								24.65	40.8704
								24.6667	40.8705
								24.6833	40.8704
								24.7	40.8699
								24.7167	40.8696
								24.7333	40.8694
								24.75	40.8687
								24.7667	40.868
								24.7833	40.867
								24.8	40.8661
								24.8167	40.8653
								24.8333	40.8657
								24.85	40.8661
								24.8667	40.8655
								24.8833	40.8648
								24.9	40.8644
								24.9167	40.864
								24.9333	40.8635
								24.95	40.8629
								24.9667	40.862
								24.9833	40.8616
								25	40.8609
								25.0167	40.861
								25.0333	40.8619
								25.05	40.8612
								25.0667	40.8608
								25.0833	40.8613
								25.1	40.8618
								25.1167	40.8624
								25.1333	40.8626
								25.15	40.8635
								25.1667	40.8636
								25.1833	40.8636
								25.2	40.8633
								25.2167	40.8633
								25.2333	40.8632
								25.25	40.8631
								25.2667	40.8638
								25.2833	40.8641
								25.3	40.8643
								25.3167	40.8648
								25.3333	40.8661
								25.35	40.8675
								25.3667	40.8679
								25.3833	40.8684
								25.4	40.8685
								25.4167	40.8677
								25.4333	40.868
								25.45	40.8686
								25.4667	40.8687
								25.4833	40.8695
								25.5	40.8688
								25.5167	40.869
								25.5333	40.8699
								25.55	40.8705
								25.5667	40.8703
								25.5833	40.8702
								25.6	40.8699
								25.6167	40.8695
								25.6333	40.8695
								25.65	40.869
								25.6667	40.8684
								25.6833	40.8665
								25.7	40.8641
								25.7167	40.8627
								25.7333	40.8612
								25.75	40.8599
								25.7667	40.8586
								25.7833	40.8574
								25.8	40.8568
								25.8167	40.8561
								25.8333	40.8548
								25.85	40.8532
								25.8667	40.8531
								25.8833	40.8523
								25.9	40.8503
								25.9167	40.8492
								25.9333	40.8466
								25.95	40.8467
								25.9667	40.8487
								25.9833	40.8543
								26	40.8548
								26.0167	40.8624
								26.0333	40.8765
								26.05	40.7893
								26.0667	40.5258
								26.0833	40.3552
								26.1	40.2555
								26.1167	40.2857
								26.1333	40.4696
								26.15	40.6051
								26.1667	40.7206
								26.1833	40.7717
								26.2	40.7778
								26.2167	40.7761
								26.2333	40.7783
								26.25	40.7824
								26.2667	40.8035
								26.2833	40.8388
								26.3	40.8787
								26.3167	40.9052
								26.3333	40.9053
								26.35	40.9076
								26.3667	40.9078
								26.3833	40.9044
								26.4	40.901
								26.4167	40.897
								26.4333	40.8932
								26.45	40.8899
								26.4667	40.8869
								26.4833	40.8844
								26.5	40.8812
								26.5167	40.8791
								26.5333	40.8775
								26.55	40.8765
								26.5667	40.8746
								26.5833	40.8727
								26.6	40.8712
								26.6167	40.8694
								26.6333	40.8674
								26.65	40.8664
								26.6667	40.8663
								26.6833	40.8666
								26.7	40.8665
								26.7167	40.8642
								26.7333	40.8634
								26.75	40.863
								26.7667	40.8625
								26.7833	40.863
								26.8	40.8637
								26.8167	40.8638
								26.8333	40.8644
								26.85	40.8646
								26.8667	40.8652
								26.8833	40.8648
								26.9	40.865
								26.9167	40.8649
								26.9333	40.8652
								26.95	40.8654
								26.9667	40.8651
								26.9833	40.8654
								27	40.8659
								27.0167	40.8663
								27.0333	40.8664
								27.05	40.8663
								27.0667	40.8671
								27.0833	40.8679
								27.1	40.8684
								27.1167	40.8686
								27.1333	40.8695
								27.15	40.8707
								27.1667	40.8711
								27.1833	40.8707
								27.2	40.8698
								27.2167	40.8692
								27.2333	40.8681
								27.25	40.8674
								27.2667	40.8665
								27.2833	40.8661
								27.3	40.8657
								27.3167	40.8663
								27.3333	40.8672
								27.35	40.8677
								27.3667	40.8678
								27.3833	40.8676
								27.4	40.8666
								27.4167	40.8664
								27.4333	40.8661
								27.45	40.8653
								27.4667	40.8635
								27.4833	40.8616
								27.5	40.8603
								27.5167	40.8594
								27.5333	40.8593
								27.55	40.8595
								27.5667	40.8597
								27.5833	40.8594
								27.6	40.859
								27.6167	40.8602
								27.6333	40.861
								27.65	40.8614
								27.6667	40.861
								27.6833	40.8607
								27.7	40.8626
								27.7167	40.8646
								27.7333	40.8651
								27.75	40.8654
								27.7667	40.8665
								27.7833	40.8687
								27.8	40.8697
								27.8167	40.8698
								27.8333	40.87
								27.85	40.8709
								27.8667	40.8716
								27.8833	40.872
								27.9	40.8717
								27.9167	40.8715
								27.9333	40.8724
								27.95	40.8727
								27.9667	40.8723
								27.9833	40.8709
								28	40.8694
								28.0167	40.8681
								28.0333	40.8672
								28.05	40.8672
								28.0667	40.8676
								28.0833	40.8669
								28.1	40.8677
								28.1167	40.8679
								28.1333	40.868
								28.15	40.8679
								28.1667	40.8686
								28.1833	40.869
								28.2	40.8689
								28.2167	40.8701
								28.2333	40.8712
								28.25	40.8714
								28.2667	40.8717
								28.2833	40.8722
								28.3	40.8726
								28.3167	40.8745
								28.3333	40.8757
								28.35	40.8764
								28.3667	40.8771
								28.3833	40.8769
								28.4	40.8772
								28.4167	40.8789
								28.4333	40.8795
								28.45	40.8791
								28.4667	40.8809
								28.4833	40.8815
								28.5	40.8803
								28.5167	40.877
								28.5333	40.8821
								28.55	40.8312
								28.5667	40.6093
								28.5833	40.4114
								28.6	40.3016
								28.6167	40.3129
								28.6333	40.4563
								28.65	40.5813
								28.6667	40.6887
								28.6833	40.7623
								28.7	40.7873
								28.7167	40.7899
								28.7333	40.7979
								28.75	40.8067
								28.7667	40.8365
								28.7833	40.8551
								28.8	40.8673
								28.8167	40.8756
								28.8333	40.8788
								28.85	40.8793
								28.8667	40.8775
								28.8833	40.8773
								28.9	40.8765
								28.9167	40.8754
								28.9333	40.8759
								28.95	40.8741
								28.9667	40.8738
								28.9833	40.8733
								29	40.8718
								29.0167	40.87
								29.0333	40.8681
								29.05	40.8667
								29.0667	40.8653
								29.0833	40.8639
								29.1	40.8625
								29.1167	40.8625
								29.1333	40.8624
								29.15	40.8613
								29.1667	40.8601
								29.1833	40.8595
								29.2	40.8593
								29.2167	40.8598
								29.2333	40.8606
								29.25	40.8604
								29.2667	40.8603
								29.2833	40.8613
								29.3	40.8625
								29.3167	40.8634
								29.3333	40.8642
								29.35	40.8651
								29.3667	40.8667
								29.3833	40.8681
								29.4	40.8693
								29.4167	40.8707
								29.4333	40.8718
								29.45	40.8728
								29.4667	40.8736
								29.4833	40.8748
								29.5	40.8763
								29.5167	40.8769
								29.5333	40.8769
								29.55	40.8764
								29.5667	40.8764
								29.5833	40.8766
								29.6	40.8769
								29.6167	40.8766
								29.6333	40.8758
								29.65	40.8754
								29.6667	40.8754
								29.6833	40.8749
								29.7	40.8741
								29.7167	40.8728
								29.7333	40.872
								29.75	40.872
								29.7667	40.8714
								29.7833	40.8708
								29.8	40.8707
								29.8167	40.87
								29.8333	40.869
								29.85	40.8683
								29.8667	40.8678
								29.8833	40.8674
								29.9	40.8674
								29.9167	40.8679
								29.9333	40.8682
								29.95	40.8684
								29.9667	40.8687
								29.9833	40.8684
								30	40.8672
								30.0167	40.8672
								30.0333	40.8677
								30.05	40.8682
								30.0667	40.8686
								30.0833	40.8682
								30.1	40.8683
								30.1167	40.8689
								30.1333	40.8684
								30.15	40.8679
								30.1667	40.8682
								30.1833	40.8685
								30.2	40.8675
								30.2167	40.8674
								30.2333	40.8676
								30.25	40.868
								30.2667	40.8681
								30.2833	40.8681
								30.3	40.8688
								30.3167	40.8686
								30.3333	40.869
								30.35	40.8693
								30.3667	40.8689
								30.3833	40.8681
								30.4	40.8682
								30.4167	40.8679
								30.4333	40.8668
								30.45	40.8653
								30.4667	40.8655
								30.4833	40.8658
								30.5	40.866
								30.5167	40.8662
								30.5333	40.8668
								30.55	40.8668
								30.5667	40.8657
								30.5833	40.8645
								30.6	40.864
								30.6167	40.8643
								30.6333	40.8651
								30.65	40.8652
								30.6667	40.8647
								30.6833	40.8644
								30.7	40.8646
								30.7167	40.8652
								30.7333	40.8646
								30.75	40.8646
								30.7667	40.8653
								30.7833	40.8662
								30.8	40.8664
								30.8167	40.8675
								30.8333	40.8693
								30.85	40.8705
								30.8667	40.8704
								30.8833	40.8716
								30.9	40.8728
								30.9167	40.8728
								30.9333	40.8735
								30.95	40.8746
								30.9667	40.8756
								30.9833	40.8793
								31	40.8823
								31.0167	40.8778
								31.0333	40.8711
								31.05	40.8627
								31.0667	40.6805
								31.0833	40.5036
								31.1	40.3911
								31.1167	40.36
								31.1333	40.4506
								31.15	40.5679
								31.1667	40.6658
								31.1833	40.7299
								31.2	40.7708
								31.2167	40.7691
								31.2333	40.772
								31.25	40.7834
								31.2667	40.806
								31.2833	40.8404
								31.3	40.8574
								31.3167	40.8749
								31.3333	40.8912
								31.35	40.8934
								31.3667	40.8925
								31.3833	40.8894
								31.4	40.8871
								31.4167	40.8842
								31.4333	40.8821
								31.45	40.8814
								31.4667	40.8806
								31.4833	40.8802
								31.5	40.8787
								31.5167	40.8759
								31.5333	40.8725
								31.55	40.8691
								31.5667	40.8669
								31.5833	40.8652
								31.6	40.863
								31.6167	40.8621
								31.6333	40.8612
								31.65	40.8602
								31.6667	40.8591
								31.6833	40.8581
								31.7	40.8576
								31.7167	40.8574
								31.7333	40.8581
								31.75	40.8577
								31.7667	40.8573
								31.7833	40.8573
								31.8	40.858
								31.8167	40.8584
								31.8333	40.8593
								31.85	40.8607
								31.8667	40.8615
								31.8833	40.8634
								31.9	40.8641
								31.9167	40.8645
								31.9333	40.8655
								31.95	40.8662
								31.9667	40.8669
								31.9833	40.868
								32	40.8688
								32.0167	40.8693
								32.0333	40.8703
								32.05	40.8697
								32.0667	40.8681
								32.0833	40.8678
								32.1	40.8684
								32.1167	40.8681
								32.1333	40.8672
								32.15	40.8667
								32.1667	40.8662
								32.1833	40.8656
								32.2	40.8642
								32.2167	40.8638
								32.2333	40.8627
								32.25	40.8621
								32.2667	40.8612
								32.2833	40.8601
								32.3	40.859
								32.3167	40.8577
								32.3333	40.8572
								32.35	40.8582
								32.3667	40.8594
								32.3833	40.8604
								32.4	40.8615
								32.4167	40.8625
								32.4333	40.8626
								32.45	40.8626
								32.4667	40.8629
								32.4833	40.863
								32.5	40.8638
								32.5167	40.8642
								32.5333	40.8638
								32.55	40.864
								32.5667	40.8653
								32.5833	40.8667
								32.6	40.8679
								32.6167	40.8689
								32.6333	40.8704
								32.65	40.8717
								32.6667	40.8725
								32.6833	40.8725
								32.7	40.8722
								32.7167	40.8718
								32.7333	40.8715
								32.75	40.8712
								32.7667	40.872
								32.7833	40.8729
								32.8	40.8738
								32.8167	40.8748
								32.8333	40.8759
								32.85	40.8769
								32.8667	40.8774
								32.8833	40.8775
								32.9	40.8782
								32.9167	40.8797
								32.9333	40.8812
								32.95	40.8816
								32.9667	40.8813
								32.9833	40.8813
								33	40.8818
								33.0167	40.8832
								33.0333	40.8846
								33.05	40.8847
								33.0667	40.8836
								33.0833	40.8831
								33.1	40.8828
								33.1167	40.8825
								33.1333	40.8818
								33.15	40.8812
								33.1667	40.88
								33.1833	40.8803
								33.2	40.8813
								33.2167	40.8816
								33.2333	40.8815
								33.25	40.881
								33.2667	40.8795
								33.2833	40.8787
								33.3	40.8782
								33.3167	40.8784
								33.3333	40.8788
								33.35	40.8786
[truncated: 911 more rows]
