# Supplementary material for: Capping protein regulates endosomal trafficking by controlling F-actin density around endocytic vesicles and recruiting RAB5 effectors
Source: eLife. 2021 Nov 19;10:e65910. doi: 10.7554/eLife.65910 (PMC8654373; doi:10.7554/eLife.65910)
Supplement: Figure 1—source data 2. [file elife-65910-fig1-data2.xlsx]

## Sheet: Sheet1
	Figure 1A					Figure 1B
						Mander‘s coefficients（with CAPZB）
	Mander‘s coefficients（with CAPZB）					Control	YM-201636
	Rab5	EEA1				0.232	0.349
	0.516	0.582				0.277	0.332
	0.433	0.653				0.35	0.4
	0.631	0.513				0.331	0.325
	0.51	0.594				0.2	0.422
	0.635	0.388				0.351	0.348
	0.573	0.458				0.385	0.436
	0.491	0.495				0.232	0.336
	0.45	0.423				0.406	0.414
	0.51	0.39				0.371	0.334
						0.243	0.527
						0.368	0.461
						0.5	0.618
						0.464	0.502
						0.349	0.364
						0.347	0.441
						0.175	0.314
						0.12	0.544
						0.163	0.399
						0.284	0.331
						0.27	0.459
						0.39	0.645
						0.29	0.385
						0.217
						0.267
						0.286
						0.318
						0.378
						0.236
						0.217
						0.256
						0.463
