# Supplementary material for: Capping protein regulates endosomal trafficking by controlling F-actin density around endocytic vesicles and recruiting RAB5 effectors
Source: eLife. 2021 Nov 19;10:e65910. doi: 10.7554/eLife.65910 (PMC8654373; doi:10.7554/eLife.65910)
Supplement: Figure 2—figure supplement 1—source data 1. [file elife-65910-fig2-figsupp1-data1.xlsx]

## Sheet: Sheet1
										Figure S2F
				Figure S2E
