# Supplementary material for: Capping protein regulates endosomal trafficking by controlling F-actin density around endocytic vesicles and recruiting RAB5 effectors
Source: eLife. 2021 Nov 19;10:e65910. doi: 10.7554/eLife.65910 (PMC8654373; doi:10.7554/eLife.65910)
Supplement: Figure 2—figure supplement 1—source data 2. [file elife-65910-fig2-figsupp1-data2.xlsx]

## Sheet: Sheet1
Figure S2E									Figure S2H							Figure S2I							Figure S2D
	EGFR intensity								WT			CapZb KO				number of endosome			endosome size（x104 nm2）					Scramble-sg											Capzβ-sg
	scramble-sg				Capzβ-sg				0	0.5	1	0	0.5	1	(H)	Scramble-sg	Capzβ-sg						0min	0.072207	0.091327	0.104382	0.070064	0.088083	0.069894	0.096218	0.114156	0.056073	0.066975		0.073897	0.067439	0.07125	0.067463	0.069194	0.069325	0.113285	0.059916	0.064185	0.06768
time（h）									8.53	3.118	0.502	4.081	4.557	1.657		123	322		Control	Capzβ-sg			1min	0.315333	0.325608	0.359923	0.22094	0.252088	0.37147	0.412781	0.375958	0.423007	0.427781		0.360664	0.385078	0.30405	0.405193	0.325321	0.398208	0.417574	0.362817	0.345098	0.334512
0	0.780383	0.744176	1.11573		0.217842	0.215257	0.186475		6.03	2.138	0.757	5.427	3.183	2.268		130	354		31.2902	0.72768			5min	0.843223	0.802869	0.722101	0.644829	0.631728	0.607134	0.630503	0.793583	0.602795	0.630806		0.569412	0.653666	0.750304	0.753655	0.68565	0.667853	0.619296	0.72894	0.703041	0.654956
0.5	0.567431	0.544023	1.00069		0.231862	0.25525	0.183454		6.33	3.383	0.89	4.253	3.97	1.827		96	337		21.8304	1.45536
2	0.299928	0.302569	0.670915		0.248471	0.241363	0.220482		6.44	1.871	1.176	4.903	3.473	1.385		81	318		10.9152	12.3705
									4.681	2.433	1.203	4.159	4.878	1.582		79	302		17.4643	14.5536			Figure S2F
	ERK1/2 intensity								7.211	2.935	0.933	3.326	4.096	2.37		50	260		95.326	0.72768				relative expression level(EGFR/hsp70)
	scramble-sg				Capzβ-sg				9.799	2.648	0.783	4.123	5.82	1.656		60	249		18.9197	5.82144			WT	1.09761
time（h）									7.87	3.496	0.897	3.641	5.805	1.927					54.576	4.36608			Capzb KO+Capzb rescue	1.02662
0	1.3453	1.39118	1.33382		1.34969	1.33473	1.32824		9.45	2.932	1.203	3.28	5.975	1.91					60.3974	18.192			Capzb KO	0.653622
0.5	1.10069	1.16684	1.19016		1.49688	1.53724	1.23527		6.756	2.508	1.306	3.934	5.709	0.799					21.1027	18.192
2	1.35509	1.5771	1.37319		1.39431	1.38747	0.975919		5.171	2.76	1.678	3.069	4.748	1.929					54.576	25.4688			WT	1.04413
									7.662	5.896	1.003	2.99	4.4	1.405					21.1027	0.72768			Capzb KO+Capzb rescue	0.935848
	p-ERK1/2 intensity								7.845	2.742	1.11	4.722	4.363	1.676					29.1072	13.8259			Capzb KO	0.685079
time（h）	scramble-sg				Capzβ-sg				6.931	1.761	1.137	3.43	5.14	1.406					18.9197	16.7366
0	0.682281	0.70477	0.835844		0.488836	0.343634	0.592476		5.531	3.236	0.881	5.013	4.858	1.736					13.0982	1.45536			WT	0.861479
0.5	1.11722	1.15176	1.35855		1.20938	1.01872	0.917261		4.817	0.951	1.352	4.717	6.454	2.265					28.3795	19.6473			Capzb KO+Capzb rescue	0.850654
2	1.13913	0.962649	1.17442		1.04234	0.828232	1.01361		8.741	1.686	0.841	1.727	4.889	1.775					16.0089	22.5581			Capzb KO	0.71994
									8.043	2.998	0.788	3.131	4.233	1.615					29.8349	13.8259
									13.221	2.215	0.808	3.514	3.3	1.754					22.5581	0.72768			Figure S2B
									11.95	1.826	0.49			1.849					53.1206	2.91072			%closure relative to Day 0
										2.264	0.706			2.837					52.3929	13.0982
											0.63								12.3705	0.72768				scramble-sg									Capzβ-sg
																			15.1925	14.5536			24h	0.398385	0.453752	0.559126	0.586716	0.573509	0.535662	0.457794	0.373456		0.218706	0.209128	0.448818	0.485702	0.277945	0.250571	0.170418	0.121417
																			28.9381	0.72768			48h	0.8884	0.8879	0.9523	0.9551	0.9526	0.9347	0.7716	0.7349		0.4994	0.4553	0.6694	0.6433	0.4336	0.5192	0.3759	0.463
																			19.5332	15.2813
																			21.7036	5.09376
																			26.0443	0.72768
																			40.5134	0.72768
																			26.0443	12.3705
																			28.2147	16.7366
																			11.5753	44.3884
																			14.4691	5.09376
																			52.0886	19.6473
																			10.1283	16.0089
																			12.2987	0.72768
																			23.1505	13.8259
																			29.6616	15.2813
																			70.8984	9.45983
																			44.1306	15.2813
																			18.0863	16.7366
																			28.2147	35.6563
																			13.0221	3.6384
																			41.9603	26.1965
																			12.3893	0.72768
																			11.6606	0.72768
																			16.762	8.00448
																			13.8469	0.72768
																			16.762	56.0313
																			9.4742	13.8259
																			21.1348	2.91072
																			9.4742	0.72768
																			20.406	8.73216
																			41.5407	0.72768
																			37.168	2.18304
																			9.4742	9.45983
																			21.1348	29.8349
																			29.8802	3.6384
																			19.6772	24.0134
																			21.8635	21.1027
																			70.6921	6.54912
																			13.1181	0.72768
																			53.9301	21.8304
																			18.2196	36.384
																			29.8802	22.5581
																			17.4643	13.0982
																			33.4733	9.45983
																			42.2054	5.82144
																			26.1965	13.0982
																			21.8304	0.72768
																			13.0982	32.7456
																			10.9152	54.576
																			11.6429	0.72768
																			17.4643	0.72768
																			29.1072	35.6563
																			22.5581	0.72768
																			9.45983	11.6429
																			16.0089	12.3705
																			10.1875	44.3884
																			21.8304	77.8617
																			24.0134	21.8304
																			32.0179	7.2768
																			60.3974	20.375
																			26.9241	25.4688
																			22.5581	0.72768
																			10.1875	1.45536
																			20.375	10.9152
																			27.6518	10.1875
																			16.7366	21.8304
																			37.1117	22.5581
																			38.567	13.0982
																			10.1875	1.45536
																			13.8259	12.3705
																			34.9286	12.3705
																			42.9331	1.45536
																			13.0982	15.2813
																			14.5536	16.7366
																			13.8259	26.9241
																			30.5625	9.45983
																			11.6429	0.72768
																			29.1072	0.72768
																			16.0089	58.9421
																			12.3705	59.6697
																			10.9152	13.0982
																			25.4688	13.8259
																			31.2902	2.18304
																			28.3795	1.45536
																			9.51268	26.9241
																			20.4888	0.725843
																			20.4888	2.90337
																			31.465	1.45169
																			13.1714	15.2427
																			120.006	9.43596
																			35.1237	30.4854
																			11.7079	7.25843
																			47.5634	6.53259
																			27.8063	2.90337
																			47.5634	8.71012
																			19.7571	27.582
																			16.0984	2.90337
																			30.7333	0.725843
																			17.5619	2.17753
																			17.5619	5.0809
																			24.8793	22.5011
																			82.6871	7.98428
																			32.1968	6.53259
																			37.319	16.6944
																			21.9523	1.45169
																			46.5715	10.8877
																			12.3705	7.30499
																			8.00448	38.7165
																			8.00448	8.03549
																			15.2813	31.4115
																			33.4733	2.922
																			7.2768	6.57449
																			45.8438	13.8795
																			16.0089	26.298
																			8.00448	8.76599
																			8.00448	14.61
																			9.45983	1.461
																			10.9152	12.4185
																			70.5849	10.227
																			67.6742	8.03549
																			30.5625	16.071
																			37.8393	5.84399
																			48.7545	18.993
																			37.8393	8.76599
																			9.45983	39.447
																			8.73216	0.730499
