# Supplementary material for: Capping protein regulates endosomal trafficking by controlling F-actin density around endocytic vesicles and recruiting RAB5 effectors
Source: eLife. 2021 Nov 19;10:e65910. doi: 10.7554/eLife.65910 (PMC8654373; doi:10.7554/eLife.65910)
Supplement: Figure 2—source data 2. [file elife-65910-fig2-data2.xlsx]

## Sheet: Sheet1
Figure 2B																Figure 2C						Fiure 2D	Size					Number					Figure 2E
WT					CapZb KO					CapZb KO+CapZb rescue						number of endosome			size of endosome				WT	CapZb KO	CapZb KO+CapZb rescue			WT	CapZb KO	CapZb KO+CapZb rescue			Scramble	CapZb-sg
0	15	30	45	60	0	15	30	45	60	0	15	30	45	60		sgNC	sgCAPZB		scamble-sg	Capzβ-sg			0.068848	0.096159	0.052945			88	413	169			1	0.497533
20.331	14.862	9.122	5.713	4.732	14.211	16.551	13.102	7.929	11.986	18.254	13.496	9.401	5.482	5.329		198	505		0.511008	0.136198			0.251359	0.040822	0.133234			97	515	144			1	0.376445
13.265	17.982	8.136	5.14	4.293	14.521	11.657	9.902	12.006	10.892	20.08	11.66	8.194	6.499	4.445		101	619		0.610185	0.3725			0.043517	0.519804	0.071562			102	458	153			1	0.646477
19.454	17.688	9.122	6.465	4.625	13.883	15.446	10.411	5.556	8.16	16.458	9.969	12.487	5.956	3.034		123	581		1.00227	0.3866			0.194852	0.038101	0.053526			64	355	89
17.847	16.285	8.136	5.482	5.439	11.092	14.084	14.187	9.176	11.741	18.549	12.21	11.084	5.263	4.421		188	605		0.903293	0.213974			0.128602	0.075294	0.069817			165	310	168
16.683	15.375	4.299	5.213	5.868	14.844	13.431	11.406	15.023	11.459	12.163	13.132	10.982	4.848	3.448		194	444		0.485	0.340876			0.153933	0.112488	0.070399			160	530	104
15.848	14.609	6.034	6.062	4.499	14.211	14.846	9.076	14.447	11.647	12.712	13.15	6.192	6.497	2.972		152	463		0.31058	0.314191			0.229925	0.137889	0.076217			111	380	131
11.594	18.863	5.201	4.503	5.027	14.521	15.699	13.253	11.293	12.91	15.017	15.336	7.317	7.307	2.861		240	629		0.12068	0.214225			0.073394	0.043544	0.06749			99	455	163
14.614	13.101	6.406	4.364	4.023	13.883	15.554	11.057	12.079	13.166	16.38	14.947	7.769	5.692	4.323		216	511		0.140769	0.101432			0.222131	0.269427	0.079708			117	303	206
13.228	16.443	7.064	6.208	4.292	11.092	14.423	10.312	12.182	9.578	19.162	11.075	7.885	3.386	4.87		82	505		0.150815	0.144182			0.043517	0.158753	0.05469			115	421	111
17.683	15.724	13.521	6.055	5.764	14.844	15.517	9.883	14.647	9.385	19.998	13.794	7.065	6.443	4.663		78	497		1.1091	0.31458			0.097426	0.111581	0.061672			128	351	95
17.049	13.852	11.754	5.589	5.469	12.758	13.05	9.062	10.78	8.594	23.731	12.34	8.178	4.211	5.068					0.241031	0.24617			0.041568	0.093438	0.137889			181	229	158
17.669	18.347	7.801	6.207	2.97	12.776	20.129	9.139	6.969	8.258	17.72	10.956	6.403	4.671	6.073					0.91111	0.24774			0.051961	0.119745	0.049454			108	297	108
15.407	12.249	8.031	7.812	4.953	17.51	14.013	11.683	10.774	6.711	15.025	11.89	5.849	6.18	5.865					0.711277	0.14866			0.365023	0.082552	0.149525			113	241	178
21.977	15.844	8.265	6.6	4.581	12.182	15.936	8.869	8.762	9.906	15.321	12.343	8.487	6.317	5.538					0.311346	0.14974			0.095477	0.04808	0.08378			116	332	255
16.335	11.223	7.956	6.008	5.233	14.398	16.465	10.851	11.006	9.259	17.632	8.54	9.609	7.071	4.54					0.511439	0.150116			0.290329	0.372844	0.069235			59	460	65
18.791	12.755	10.809	8.252	4.909	15.234	15.802	15.448	11.476	11.231	18.931	11.585	8.262	6.463	5.095					0.511523	0.15158			0.113664	0.127003	0.048872			102	418	154
15.015	14.115	7.54	4.901	4.435	16.839	13.231	17.687	9.703	7.058	18.226	15.378	6.425	7.048	4.156					0.861612	0.15217			0.059105	0.102509	0.102398			83	451	64
19.486	13.51	10.38	5.693	4.849	16.851	12.89	9.605	10.208	8.383	12.617	13.302	7.549	7.088	5.823					0.311731	0.15317			0.625475	0.092531	0.065163			114	216	136
22.254	14.305	7.612	4.916	5.139	15.176	12.843	16.773	11.522	6.759	17.013	13.658	7.733	6.345	5.214					0.841817	0.154198			0.36827	0.05443	0.089599			89	427	83
16.26	12.201	11.364	5.928	5.69	15.709	11.535	14.353	12.283	9.8	19.896	17.85	8.734	6.448	6.738					0.411198	0.25558			0.120159	0.045358	0.079708			67	550	67
17.283	13.387	7.994	8.241	4.768	12.629	13.993	13.139	9.88	14.152	16.757	14.984	8.064		5.286					0.912059	0.31565			0.11886	0.038101	0.121598			133	474	105
	11.515	8.411	7.2	5.38	12.291	15.313	15.045	9.53	16.156	16.468	12.28	7.218		5.256					0.312115	0.257421			0.054559	0.039008	0.159997			204	425	102
	13.116	8.193	6.726	3.75	14.451	16.882	14.845	10.356	11.502	15.242	11.052	10.514		6.165					0.512215	0.21588			0.040269	0.072573	0.043636			145		207
	14.148	9.817	6.594		18.846	15.75		9.13	14.245	14.24	15.059	9.862		6.738					0.823162	0.315974			0.042218	0.047172	0.091344			93		180
	8.435	8.94	4.903		18.126	17.552		10.461	11.344		12.763	11.264		5.286					0.832426	0.160322			0.042867	0.152403	0.054108			135
	11.637	6.027			17.552	15.54		11.569	10.007			11.77		5.256					0.711258	0.161363			0.142891	0.310249	0.098908			112
	11.158	6.118			18.646	19.497		9.056				8.76		6.165					0.66679	0.31628			0.05326	0.061687	0.292068			136
	10.817	7.477			16.179			8.239						5.907					0.627108	0.163355			0.063652	0.089809	0.168143
	12.563	5.609			10.858									5.947					0.811288	0.231644			0.060404	0.074387	0.174543
	10.675	5.498			15.317									4.008					0.51298	0.221655			0.115612	0.146053	0.053526
	10.118				19.104									4.637					1.13043	0.16617			0.187058	0.06078	0.403194
	12.108				14.261									4.319					0.31318	0.21675			0.259803	0.180525	0.037236
	11.12													4.471					0.41328	0.26817			0.457253	0.36105	0.058181
	13.035													4.543					0.311338	0.36925			0.040919	0.047172	0.040727
														5.657					0.313423	0.21705			0.064951	0.125188	0.037818
														5.453					0.635108	0.200172			0.044816	0.135167	0.079708
														4.275					0.133677	0.201728			0.061703	0.117931	0.60799
																			0.37129	0.301733			0.03897	0.07348	0.054108
																			0.71388	0.401745			0.050662	0.082552	0.045963
																			0.411398	0.201752			0.096127	0.118838	0.356067
																			0.311408	0.176248			0.112365	0.401873	0.447411
																			0.941108	0.1775			0.061054	0.045358	0.300795
																			0.842232	0.178107			0.124056	0.184154	0.526537
																			0.411438	0.179347			0.050012	0.05443	0.15127
																			0.124439	0.180181			0.700818	0.058058	0.153598
																			0.511458	0.190181			0.049362	0.042637	0.043636
																			0.44615	0.210183			0.101973	0.328393	0.161161
																			0.47188	0.183149			0.050662	0.049894	0.105307
																			0.811488	0.31845			0.429324	0.058058	0.112289
																			0.749309	0.318533			0.05261	0.046265	0.061672
																			0.911508	0.401868			0.038321	0.090716	0.107053
																			0.551116	0.418725			0.042218	0.081645	0.089599
																			0.52911	0.188107			0.042218	0.062594	0.168143
																			0.175315	0.001898			0.038321	0.07983	0.300795
																			0.811548	0.190529			0.277989	0.050801	0.345013
																			0.155539	0.219117			0.136396	0.117024	0.162907
																			0.145669	0.319241			0.108468	0.052615	0.457302
																			0.57124	0.220193			0.176666	0.059873	0.052945
																			0.58718	0.261947			0.222131	0.093438	0.193161
																			0.91598	0.019525			0.227977	0.099788	0.061672
																			0.960124	0.019674			0.05261	0.3293	0.197815
																			0.316139	0.197149			0.068848	0.050801	0.085526
																			1.36248	0.019899			0.191604	0.143332	1.2026
																			0.16393	0.199107			0.225379	0.206833	0.048872
																			0.64286	0.020083			0.411138	0.055337	0.039563
																			0.146515	0.252014			0.057806	0.427273	0.438102
																			0.66556	0.272029			0.088982	0.059873	0.064581
																			0.611678	0.282033			0.214987	0.06078	0.143125
																			0.611688	0.32048			0.077291	0.172361	0.104726
																			0.176915	0.292058			0.041568	0.058058	0.172797
																			0.70293	0.206107			0.081838	0.066223	0.091926
																			0.71448	0.020799			0.064301	0.164196	0.306031
																			0.711728	0.020817			0.155882	0.136074	0.047708
																			0.873563	0.209165			0.03897	0.509825	0.158834
																			0.974494	0.252102			0.040269	0.567883	0.541664
																			0.701176	0.221158			0.050012	0.050801	0.075635
																			0.611768	0.21217			0.053909	0.181432	0.873295
																			1.07742	0.21366			0.073394	0.099788	0.203633
																			0.117823	0.214107			0.455304	0.062594	0.068072
																			0.879178	0.215297			0.081838	0.038101	0.331631
																			0.118015	0.216107			0.083137	0.076202	1.69539
																			0.128115	0.321741			0.058456	0.063501	0.097162
																			0.178215	0.121858			0.135097	0.48261	0.069817
																			0.811838	0.32198			0.740437	0.048987	1.06529
																			0.911848	0.220223			0.047414	0.049894	0.246687
																			0.801186	0.302218			0.172119	0.167825	0.215851
																			0.118615	0.022233			0.044166	0.129724	0.055854
																			0.701188	0.022333			0.054535	0.26217	0.570173
																			0.801189	0.102245			0.176546	0.059873	0.051781
																			0.989216	0.225198			0.238476	0.059873	0.230396
																			0.701191	0.222625			0.333681	0.06078	0.41483
																			0.701192	0.2278			0.490817	0.074387	0.562609
																			0.159254	0.102285			0.243097	0.06078	0.833732
																			0.93633	0.10023			0.363722	0.051708	0.070399
																			0.601195	0.12305			0.227846	0.07983	0.431702
																			0.95332	0.231529			0.099365	0.078923	0.091344
																			0.600357	0.023217			0.073484	0.066223	0.152434
																			0.701237	0.233339			0.066089	0.154218	0.556209
																			0.601102	0.42348			0.214443	0.057151	0.154761
																			0.903156	0.023541			0.038359	0.125188	0.697007
																			0.511049	0.323691			0.094281	0.449952	0.228651
																			0.85154	0.250238			0.459389	0.059873	0.079708
																			0.706151	0.323899			0.235241	0.177804	0.148943
																			0.907242	0.22398			0.24356	0.066223	0.237378
																			0.80812	0.024025			0.039746	0.053523	0.230978
																			0.501109	0.024141			1.1115	0.080737	0.066908
																			0.501111	0.24214			0.09197	0.213183	0.255414
																			0.71181	0.2438			0.237552	0.05443	0.06749
																			0.601113	0.244207			0.125246	0.146053	0.214106
																			0.401114	0.245107			0.126633	0.049894	0.163488
																			0.8145	0.124674			0.045754	0.122467	0.681298
																			0.915181	0.124758			0.089197	0.045358	0.047127
																			0.96221	0.124825			0.09197	0.181432	0.075635
																			0.87196	0.124999			0.92109	0.099788	0.386321
																			0.88237	0.302508			0.061005	0.058966	0.066326
																			0.141986	0.251157			0.226922	0.14696	0.164652
																			0.720559	0.3528			0.320279	0.227698	0.071562
																			0.621216	0.25319			0.668287	0.05443	0.163488
																			0.312215	0.25414			0.047141	0.053523	0.06109
																			0.312396	0.255397			0.039284	0.271241	0.065163
																			0.31245	0.256157			0.052224	0.053523	0.072144
																			0.525498	0.325741			0.054073	0.219533	0.332795
																			0.301127	0.402588			0.053611	0.100695	0.060508
																			0.701128	0.035917			0.09197	0.138796	0.381085
																			0.801129	0.260173			0.075795	0.24947	0.481738
																			0.629775	0.261487			0.16453	0.049894	0.058763
																			0.730101	0.262182			0.096592	0.24947	0.470102
																			0.731508	0.426325			0.459389	0.313878	0.052363
																			1.03247	0.36425			0.055922	0.185061	0.451484
																			0.301133	0.36566			0.134489	0.04808	0.211197
																			1.03415	0.36683			0.109533	0.175989	0.191415
																			0.113535	0.26733			0.075332	0.037194	0.150689
																			0.301136	0.268116			0.716814	0.175082	0.097744
																			0.37247	0.26919			0.063316	0.045358	0.047708
																			0.113891	0.127083			0.049451	0.065316	0.643481
																			0.30114	0.027133			0.17747	0.312971	0.18967
																			0.20114	0.22728			0.091046	0.037194	0.283341
																			0.211415	0.273107			0.080878	0.197761	0.043636
																			0.42181	0.37466			0.045292	0.11521	0.787187
																			0.211435	0.27525			0.112305	0.190504	0.091926
																			0.201145	0.12768			0.321665	0.113395	0.060508
																			1.04526	0.277487			0.122935	0.169639	0.040145
																			0.261147	0.278314			0.210284	0.055337	0.077962
																			0.211147	0.02795			0.332757	0.051708	0.345013
																			0.271149	0.228033			0.070711	0.263984	0.235051
																			0.49211	0.28133			0.224149	0.066223	0.264141
																			0.50247	0.28299			0.263433	0.195947	0.559118
																			0.11514	0.28399			0.059157	0.051708	0.32814
																			0.011525	0.428491			0.107222	0.097973	0.191997
																			0.135315	0.302858			0.54073	0.101602	0.831405
																			0.301154	0.286124			0.07903	0.042637	0.042472
																			0.301156	0.287157			0.052224	0.123374	0.42123
																			1.05679	0.028817			0.100289	0.069851	0.082617
																			0.115791	0.289173			0.124784	0.219533	0.345594
																			0.221159	0.290124			0.236165	0.164196	0.14487
																			0.59159	0.291562			0.986717	0.108859	0.066908
																			1.06091	0.292223			0.105835	0.049894	0.040727
																			1.06133	0.293198			0.33553	0.06078	0.071562
																			0.116225	0.002948			0.582325	0.118838	0.425884
																			0.011635	0.29533			0.514849	0.048987	0.066908
																			0.211165	0.296297			0.038359	0.087995	0.038981
																			0.241166	0.297149			0.104449	0.283942	0.391557
																			0.11661	0.298107			0.105835	0.091623	0.412503
																			0.101167	0.029991			0.069324	0.114302	0.08029
																			1.1683	0.030017			0.152051	0.050801	0.050617
																			0.11692	0.030166			0.169614	0.04808	0.061672
																			0.10117	0.302207			0.259273	0.158753	0.169888
																			0.71306	0.303413			0.041595	0.065316	0.069235
																			0.11721	0.003048			0.220914	0.752944	0.103591
																			0.117381	0.130558			0.113692	0.041729	0.160272
																			0.151174	0.33068			0.244946	0.454488	0.052121
																			0.16756	0.230725			0.128019	0.038101	0.1505
																			1.17613	0.530833			0.039284	0.26852	0.360938
																			0.17773	0.330983			0.295322	0.047172	0.065803
																			0.17786	0.131017			0.067476	0.062594	0.050818
																			0.187975	0.131199			0.163143	0.343814	0.166136
																			0.24118	0.312198			0.203814	0.28122	0.072969
																			0.281181	0.23138			0.446449	0.046265	0.119227
																			0.401182	0.331433			0.30133	0.074387	0.041697
																			0.118335	0.231517			0.133565	0.145146	0.041045
																			0.118486	0.131633			0.081803	0.06713	0.226075
																			0.585221	0.131741			0.039746	0.117024	0.136166
																			0.11861	0.131891			0.05777	0.051708	0.699725
																			0.211188	0.131941			0.056846	0.19504	0.070363
																			0.17883	0.32014			0.294331	0.485332	0.061894
																			0.18896	0.132133			0.108774	0.197761	0.166136
																			0.219025	0.032241			0.070965	0.161475	0.643043
																			0.491287	0.323107			0.093069	0.072573	0.15506
																			0.211927	0.324207			0.045953	0.094345	0.668452
																			0.211931	0.325297			0.04828	0.146053	0.131606
																			0.11941	0.232617			0.112265	0.087088	0.358332
																			0.311952	0.2733			0.594479	0.270334	0.526423
																			0.96151	0.283284			0.095396	0.116117	0.097727
																			0.411977	0.23295			0.248378	0.041729	0.040394
																			0.211982	0.33305			1.06215	0.061687	0.093166
																			0.411993	0.333117			0.502573	0.239491	0.136818
																			0.120035	0.33325			0.069802	0.146053	0.175257
																			0.750058	0.333273			0.037228	0.058966	0.053424
																			0.510162	0.203345			0.063985	0.042637	0.123788
																			0.52239	0.335322			0.51537	0.103416	0.093818
																			0.43371	0.033683			0.054678	0.050801	0.181121
																			0.404301	0.033766			0.073292	0.063501	0.213045
																			0.110515	0.338289			0.115173	0.093438	0.271029
																			0.110615	0.033983			0.045953	0.11521	0.104894
																			0.110723	0.340107			0.164034	0.070759	0.24953
																			1.00826	0.341107			0.157054	0.116117	0.09903
																			0.311095	0.342207			0.188465	0.087088	0.082742
																			0.211101	0.343149			0.730592	0.11521	0.04756
																			0.411112	0.344215			0.072129	0.099788	0.502317
																			0.301113	0.034533			0.150656	0.095252	0.040394
																			0.613563	0.034658			0.094232	0.187783	0.096424
																			0.54672	0.100348			0.057005	0.202297	0.536195
																			0.615973	0.103488			0.137277	0.062594	0.07753
																			0.101117	0.349124			0.136114	0.318414	0.27559
																			0.217119	0.035017			0.2699	0.118838	0.373969
																			0.111815	0.13518			0.484541	0.370122	0.082091
																			1.01912	0.135274			0.044208	0.260355	0.280151
																			0.411208	0.353281			0.049443	0.074387	0.061894
																			0.311211	0.035458			0.059913	0.058966	0.062545
																			0.301123	0.035591			0.390308	0.053523	0.581801
																			0.251124	0.103563			0.139022	0.209554	0.043651
																			0.112415	0.135725			0.5049	0.043544	0.063197
																			0.112515	0.103589			0.461855	0.039915	0.286014
																			0.251127	0.135941			0.053515	0.219533	0.059939
																			0.301128	0.360107			0.102376	0.084366	0.083394
																			0.201129	0.23615			0.214641	0.052615	0.091863
																			0.29102	0.336299			0.040136	0.132446	0.109454
																			0.30232	0.363116			0.535729	0.038101	0.119878
																			0.091318	0.10365			0.157054	0.101602	0.721225
																			0.113262	0.136525			0.340284	0.040822	0.438468
																			0.401134	0.366611			0.196027	0.186875	0.082091
																			0.934363	0.11678			0.07271	0.18869	0.115969
																			0.935139	0.36814			0.263502	0.078016	0.085348
																			0.7361	0.369132			0.832968	0.039915	0.363544
																			1.03729	0.037083			0.082599	0.072573	0.063848
																			0.113854	0.371917			0.991186	0.037194	0.075576
																			0.39252	0.003728			0.063985	0.239491	1.06262
																			0.501141	0.373273			0.989441	0.105231	0.315332
																			0.41173	0.037433			0.158799	0.166918	0.201969
																			0.42733	0.375182			0.041881	0.187783	0.127697
																			0.843286	0.037625			0.08318	0.071666	0.037788
																			0.4412	0.377149			0.286769	0.19504	0.368105
																			0.501146	0.103783			0.100631	0.039915	0.638483
																			0.114623	0.0137983			0.171014	0.050801	0.048212
																			0.114715	0.203808			0.040718	0.143332	0.159621
																			0.114815	0.403812			0.054096	0.18234	0.041697
																			1.14954	0.43825			0.137859	0.063501	0.28406
																			1.15011	0.383107			0.120408	0.058058	0.518604
																			0.115115	0.384107			0.038973	0.113395	0.800058
																			0.52266	0.38543			0.386237	0.05443	0.617634
																			0.115354	0.038666			0.290841	0.055337	0.117272
																			0.115431	0.387132			0.112265	0.639549	0.043651
																			0.115569	0.388124			1.06506	0.302085	0.048212
																			1.1563	0.138941			0.122735	0.14061	0.29709
																			0.601158	0.280391			0.948141	0.087088	0.229333
																			1.15845	0.339191			0.239653	0.141517	0.330969
																			0.115915	0.139217			0.100631	0.058966	0.510135
																			0.116015	0.139391			0.091906	0.145146	0.046909
																			0.61131	0.139499			0.059913	0.084366	0.092515
																			0.401163	0.139525			0.044789	0.045358	0.061242
																			1.16325	0.13968			0.041881	0.284849	0.059288
																			0.116446	0.103978			0.098886	0.057151	1.12582
																			0.116593	0.103983			0.049443	0.223162	0.24106
																			0.116639	0.103998			0.083762	0.07348	0.044303
																			0.116715	0.400306			0.75386	0.25582	0.054727
																			0.301169	0.240158			0.06224	0.062594	0.115318
																			0.30117	0.140241			0.594479	0.117931	0.105545
																			0.201171	0.340333			0.094814	0.278499	0.040394
																			1.17118	0.240499			0.066893	0.166011	0.420226
																			0.117254	0.04055			0.12448	0.081645	0.304257
																			0.211735	0.406124			0.153564	0.193225	0.901694
																			0.101175	0.407355			0.166361	0.052615	0.048863
																			0.261176	0.040874			0.097141	0.058058	0.253439
																			0.211765	0.040983			0.30422	0.118838	0.039742
																			0.117777	0.410289			0.140185	0.044451	0.893876
																			0.27854	0.411149			0.065148	0.286663	0.141378
																			0.27939	0.412182			0.067475	0.081645	0.124439
																			1.08013	0.41324			0.367623	0.141517	0.568119
																			0.981108	0.414116			0.084926	0.12156	0.390908
																			0.882386	0.415182			0.215804	0.089809	0.212393
																			0.983216	0.004168			0.146584	0.077109	0.21109
																			0.78417	0.41714			0.069802	0.076202	0.220863
																			0.118554	0.418207			0.142512	0.101602	0.049515
																			0.21868	0.14198			0.108193	0.158753	0.073621
																			0.5391	0.042033			0.06224	0.043544	0.190893
																			0.5438	0.421124			0.116918	0.06078	0.123136
																			0.55355	0.422182			0.056121	0.046265	0.266469
																			0.6103	0.042358			0.038305	0.049894	0.095772
																			0.578	0.042417			0.060576	0.099788	0.059288
																			0.817	0.425116			0.041868	0.08618	0.099681
																			0.5958	0.042658			0.122933	0.039915	0.337484
																			0.611608	0.427223			0.093536	0.169639	0.36159
																			0.0311618	0.042825			0.107789	0.061687	0.174606
																			0.6271	0.042917			0.053449	0.044451	0.050167
																			0.63727	0.430116			0.0873	0.175989	0.476908
																			0.648	0.043183			0.164801	0.038101	0.716013
																			0.411658	0.143233			0.215578	0.337464	0.070363
																			0.66165	0.43338			0.329602	0.050801	0.357681
																			0.41678	0.143441			0.212014	0.094345	0.043
																			0.46825	0.143517			0.387505	0.171454	0.081439
																			0.957	0.043699			0.222704	0.048987	0.097075
																			0.311708	0.437173			0.121151	0.12791	0.110106
																			0.71397	0.004388			0.039196	0.075294	0.037136
																			0.37295	0.043917			0.259228	0.081645	0.100333
																			0.73669	0.440107			0.071265	0.192318	0.04756
																			0.7433	0.441173			0.240521	0.062594	0.135515
																			0.517	0.144233			0.097099	0.124281	0.347256
																			0.5768	0.443289			0.052558	0.138796	0.368105
																			0.57717	0.444256			0.104226	0.264891	0.095121
																			0.5788	0.104456			0.363453	0.103416	0.0645
																			0.5798	0.104468			0.066811	0.166918	0.102288
																			0.011808	0.447149			0.040087	0.080737	0.042348
																			0.88125	0.04485			0.091754	0.12156	0.040345
																			0.68283	0.044941			0.093536	0.081645	0.154512
																			0.611835	0.045083			0.048995	0.171454	0.054079
																			0.658433	0.451182			0.20667	0.192318	0.036911
																			0.658517	0.045233			0.122933	0.068944	0.052362
																			0.458641	0.045366			0.166583	0.156939	0.078973
																			0.44715	0.045425			0.078392	0.037194	0.072964
																			0.571888	0.004558			0.061466	0.07348	0.060946
																			0.511898	0.456149			0.040087	0.05443	0.143352
																			0.611908	0.457149			0.407994	0.052615	0.042061
																			0.81918	0.045825			0.542508	0.096159	0.159662
																			0.92421	0.459132			0.190635	0.097066	0.097857
																			0.819317	0.46019			0.465006	0.143332	0.050645
																			0.911948	0.046191			0.066811	0.156032	0.149361
																			0.811958	0.462182			0.269918	0.14696	0.13906
																			0.89674	0.004638			0.25032	0.048987	0.053221
																			0.79741	0.146425			0.073938	0.069851	0.048929
																			0.71988	0.146558			0.121151	0.05443	0.319324
																			0.69941	0.246625			0.074829	0.041729	0.046353
																			0.820029	0.146758			0.145203	0.087088	0.497871
																			0.452867	0.104688			1.18568	0.081645	0.054937
																			0.211538	0.469248			0.046322	0.063501	0.087557
																			0.311548	0.047074			0.088191	0.07983	0.194856
																			0.55519	0.471165			0.040978	0.130631	0.071247
																			0.411568	0.204728			0.139858	0.065316	0.047212
																			0.457372	0.473173			0.114025	0.092531	0.206874
																			0.58322	0.474149			0.107789	0.059873	0.090132
																			0.459463	0.47524			0.726016	0.24947	0.151078
																			0.46033	0.047658			0.196871	0.043544	0.266962
																			0.51615	0.304779			0.057903	0.043544	0.056654
																			0.511627	0.104784			0.04365	0.393708	0.041203
																			0.211638	0.479231			0.233394	0.146053	0.043778
																			0.311644	0.480306			0.579031	0.051708	0.1073
																			1.31651	0.481116			0.064139	0.120653	0.454092
																			0.221668	0.482157			0.139858	0.06713	0.052362
																			0.246717	0.104838			0.044541	0.434531	0.04807
																			1.41684	0.104848			0.062357	0.206833	0.349368
																			0.569719	0.048525			0.044541	0.095252	1.04209
																			0.217054	0.486124			0.057051	0.07983	0.38027
																			0.471248	0.487157			0.049483	0.074387	0.042061
																			0.372165	0.048817			0.037258	0.06713	0.554525
																			0.311736	0.34898			0.08092	0.092531	0.084981
																			0.311746	0.104909			0.081502	0.108859	0.363102
																			0.311758	0.491487			0.069277	0.056244	0.071247
																			1.41763	0.34925			0.048319	0.099788	0.312457
																			1.21776	0.24935			0.057634	0.045358	0.095282
																			0.317854	0.494165			0.041915	0.117024	0.187131
																			0.33794	0.49519			0.176394	0.038101	0.488428
																			0.401181	0.496116			0.044244	0.065316	0.168246
																			0.418169	0.104972			0.045408	0.042637	0.049787
																			0.382182	0.149825			0.136225	0.139703	0.134768
																			0.483207	0.149941			0.149032	0.068037	0.056654
																			0.51848	0.500215			0.042498	0.043544	0.178547
																			0.385248	0.501207			0.114103	0.11521	0.047212
																			0.211868	0.502553			0.16999	0.15331	0.309023
																			0.587975	0.050317			0.387717	0.196854	0.075539
																			0.551189	0.050458			0.100131	0.11521	0.092707
																			0.518912	0.050583			0.050648	0.048987	0.046353
																			0.44119	0.506223			0.098385	0.156939	0.08584
																			0.380119	0.050791			0.063455	0.124281	0.187131
																			0.340119	0.050874			0.055887	0.102509	0.06953
																			0.393132	0.509124			0.072188	0.097066	0.101291
																			0.394198	0.15105			0.041333	0.21409	0.154512
																			0.279525	0.105114			0.03784	0.108859	0.235201
																			0.496116	0.151233			0.069277	0.039008	0.087557
																			0.411978	0.102144			0.122835	0.11521	0.186272
																			0.519833	0.021558			0.349877	0.039915	0.043778
																			0.5995	0.021617			0.045408	0.039915	0.06438
																			0.30137	0.217314			0.138554	0.205019	0.208591
																			0.501202	0.401338			0.038422	0.043544	0.307306
																			0.512028	0.201348			0.152525	0.040822	0.263528
																			0.462038	0.220014			0.041915	0.074387	0.080689
																							0.052394	0.074387	0.062663
																							0.568186	0.069851	0.03777
																							0.563529	0.048987	0.315032
																							0.187455	0.254913	0.066955
																							0.791734	0.129724	0.115025
																							0.257896	0.061687	0.705603
																							0.135061	0.098881	0.066955
																							0.064037	0.083459	0.858398
																							0.307379	0.143332	0.075539
																							0.369088	0.199576	0.299581
																							0.05123	0.352886	0.318466
																							0.268375	0.039008	0.285846
																							1.00539	0.135167	0.138202
																							0.33998	0.06713	0.054079
																							0.144957	0.072573	0.068672
																							0.809199	0.179618	0.7717
																							0.070441	0.172361	0.119317
																							0.192694	0.142424	0.080689
																							0.065784	0.312064	0.043778
																							0.108863	0.06713	0.26782
																							0.050066	0.058966	0.04807
																							0.039587	0.078923	0.309882
																							0.051812	0.149682	0.494437
																							0.124	0.105231	0.040345
																							0.051812	0.058058	0.070389
																							0.09722	0.152403	0.153653
																							0.292243	0.042637	0.470402
																							0.206084	0.076202	0.223183
																							0.350459	0.092615	0.257519
																							0.03784	0.212519	0.115025
																							0.128075	0.076077	0.048929
																							0.076263	0.062019	0.363961
																							0.115849	0.164558	1.1657
																							0.059962	0.047962	0.357093
																							0.188619	0.063673	0.165671
																							0.122835	0.038865	0.094424
																							0.039587	0.050442	0.096999
																							0.042498	0.094269	0.315032
																							0.608355	0.200115	0.273829
																							0.141464	0.087654	0.065238
																							0.194441	0.131481	0.240351
																							0.153107	0.055404	0.249794
																							0.104206	0.133135	0.623197
																							0.098385	0.055404	0.339067
																							0.03784	0.043	0.240351
																							0.494252	0.061192	0.099574
																							0.166497	0.102538	0.334775
																							0.651434	0.066981	0.343359
																							0.124	0.134788	0.080689
																							0.391792	0.055404	0.236918
																							0.359773	0.258	0.448942
																							0.292825	0.077731	0.62663
																							0.052394	0.038038	0.145928
																							0.16999	0.114115	0.370828
																							0.405182	0.037212	0.640365
																							0.74458	0.052923	0.143352
																							0.039587	0.270404	0.378553
																							0.127493	0.066154	0.450659
																							0.215398	0.060365	0.100433
																							0.114103	0.215827	0.437783
																							0.106535	0.362192	0.048929
																							0.054141	0.115769	0.478986
																							0.285839	0.097577	0.114167
																							0.081502	0.071115	0.37512
																							0.04599	0.044654	0.91076
																							0.187455	0.043	0.205157
																							2.04861	0.203423	0.056654
																							0.039005	0.087654	0.086698
																							0.077427	0.13975	0.078973
																							0.694514	0.047135	0.104725
																							0.064037	0.057058	0.121034
																							0.064619	0.165385	0.450659
																							0.073934	0.095096	0.047212
																							0.217727	0.142231	0.098716
																							0.048901	0.111635	0.071247
																							0.089652	0.050442	0.472119
																							0.153107	0.090962	0.121034
																							0.314947	0.043	0.049787
																							0.273614	0.072769	0.050645
																							0.03784	0.060365	0.045495
																							0.118178	0.129827	0.119317
																							0.058216	0.081038	0.156989
																							0.041915	0.177788	0.341722
																							0.053558	0.129827	0.18541
																							0.040751	0.119077	0.260521
																							0.065784	0.121558	0.305858
																							0.04599	0.039692	0.089321
																							0.041915	0.138923	0.039924
																							0.058798	0.102538	0.071051
																							0.042498	0.094269	0.067668
																							0.049483	0.282808	0.271348
																							0.15369	0.077731	0.288941
																							0.424393	0.056231	0.284881
																							0.099549	0.081038	0.121802
																							0.116432	0.298519	0.128569
																							0.078009	0.103365	0.254431
																							0.227624	0.121558	0.077141
																							0.174647	0.238154	0.115035
																							0.215398	0.044654	0.186086
																							0.189783	0.088481	0.127215
																							0.189201	0.129827	0.316008
																							0.043662	0.1505	0.253754
																							0.087906	0.320019	0.114358
																							0.218309	0.076904	0.068344
																							0.052394	0.088481	0.068344
																							0.150779	0.234846	0.393826
																							0.057634	0.250558	0.045337
																							0.048319	0.246423	0.129922
																							0.069277	0.076904	0.144132
																							0.078009	0.219962	0.654347
																							0.048319	0.106673	0.040601
																							0.038422	0.129	0.121802
																							0.063455	0.138923	0.63134
																							0.071023	0.115769	0.198943
																							0.081502	0.131481	0.060901
																							0.047155	0.104192	0.100825
																							0.050066	0.171173	0.305858
																							0.394121	0.298519	0.048721
																							0.06753	0.07525	0.042631
																							0.196187	0.046308	0.140749
																							0.047737	0.131481	0.224657
																							0.059962	0.054577	0.108268
																							0.171154	0.234019	0.506155
																							0.079173	0.066981	0.493298
																							0.039587	0.186885	0.525101
																							0.069277	0.042173	0.271348
																							0.055305	0.339039	0.275408
																							0.130985	0.228231	0.079848
																							0.193858	0.076904	0.351195
																							0.058216	0.047962	0.052104
																							0.068695	0.047962	0.121802
																							0.040128	0.122385	0.054811
																							0.370142	0.061192	0.086615
																							0.040819	0.111635	0.172553
																							0.042895	0.143058	0.167816
																							0.065726	0.057885	0.041954
																							0.143214	0.062846	0.106915
																							0.047046	0.129	0.312625
																							0.103778	0.054577	0.192853
																							0.051889	0.129	0.289618
																							0.044279	0.266269	0.277438
																							0.042895	0.199289	0.320068
																							0.177115	0.170346	0.139396
																							0.331398	0.085173	0.331572
																							0.053965	0.112462	0.66179
																							0.700849	0.042173	0.355932
																							0.058808	0.043	0.190146
																							0.165353	0.131481	0.319392
																							0.04843	0.749192	0.224657
																							0.442095	0.138096	0.054811
																							0.044279	0.073596	0.054811
																							0.042895	0.121558	0.297061
																							0.111389	0.071115	0.206387
																							0.11554	0.073596	0.064961
																							0.04843	0.07525	0.064961
																							0.03736	0.109154	0.862087
																							0.047738	0.062846	0.095411
																							0.196487	0.117423	0.162403
																							0.123842	0.058712	0.198266
																							0.074028	0.132308	0.126539
																							0.146673	0.0645	0.109622
																							0.184033	0.063673	0.048044
																							0.220702	0.055404	0.123832
																							0.35077	0.094269	0.23007
																							0.080947	0.281154	0.117065
																							0.725064	0.153808	0.144132
																							0.089941	0.040519	0.330895
																							0.066418	0.136442	0.039247
																							0.150824	0.085173	0.221273
																							0.102394	0.253865	0.254431
																							0.285044	0.07525	0.198379
																							0.084406	0.086827	0.06104
																							1.73932	0.100885	0.065684
																							0.074028	0.105846	0.076963
																							0.077488	0.413462	0.138666
																							0.074028	0.143885	0.106156
																							0.224161	0.211692	0.180465
																							0.296806	0.038865	0.053741
																							0.085098	0.050442	0.088906
																							0.147365	0.058712	0.12606
																							0.583925	0.130654	0.152599
																							0.125918	0.114115	0.064357
																							0.040819	0.043	0.059713
																							0.352154	0.042173	0.181128
																							0.396433	0.086	0.153263
																							0.095476	0.099231	0.068338
																							1.21697	0.186058	0.277996
																							0.053965	0.134788	0.154589
																							0.234539	0.072769	0.099521
																							0.050505	0.079385	0.25212
																							0.183342	0.095096	0.091559
																							0.074028	0.171173	0.079617
																							0.243533	0.085173	0.039808
																							0.871737	0.130654	0.153926
																							0.791482	0.043	0.067011
																							0.339701	0.146365	0.313823
																							0.166045	0.196808	0.112791
																							0.082331	0.116596	0.183119
																							0.213783	0.057058	0.153263
																							0.453857	0.257173	0.295246
																							0.231079	0.083519	0.04578
																							0.085098	0.113288	0.06104
																							0.079563	0.083519	0.610396
																							0.05604	0.043	0.091559
																							0.054657	0.071115	0.151272
																							0.459392	0.083519	0.055732
																							0.14183	0.086827	0.118098
																							0.205481	0.109154	0.28463
																							0.251835	0.047962	0.118098
																							0.049814	0.094269	0.159897
																							0.094092	0.052096	0.071655
																							0.04843	0.095923	0.242832
																							0.038744	0.078558	0.112127
																							0.498827	0.152154	1.13321
																							0.11554	0.082692	0.276669
																							0.716761	0.095096	0.153926
																							0.417188	0.160423	0.042462
																							1.62863	0.149673	0.389459
																							0.102394	0.232365	0.130041
																							0.072645	0.142231	0.082271
																							0.630972	0.049615	0.096204
																							0.139755	0.044654	0.054405
																							1.09313	0.195154	0.161224
																							0.572856	0.043	0.072982
																							0.097552	0.252212	0.289275
																							0.143906	0.2795	0.050424
																							0.785947	0.091788	0.049097
																							0.149441	0.138096	0.100185
																							0.422031	0.086	0.04578
																							0.314794	0.130654	0.441874
																							0.047738	0.060365	0.044453
																							0.075412	0.143058	0.045116
																							0.101703	0.062846	0.055068
																							0.095476	0.115769	0.080944
																							0.045662	0.101712	0.410027
																							0.117615	0.037212	0.277996
																							0.095476	0.160423	0.053741
																							0.0595	0.041346	0.106819
																							0.151516	0.065327	0.101512
																							0.060883	0.155462	0.039808
																							0.070569	0.157115	0.058386
																							0.161894	0.186885	0.272024
																							0.076796	0.216654	0.094213
																							0.056732	0.059538	0.197715
																							0.190952	0.052096	0.037818
																							0.412345	0.209212	0.406046
																							0.051197	0.153808	0.043126
																							0.049814	0.049615	0.196388
																							0.465618	0.330769	0.223591
																							0.081639	0.265442	0.041799
																							0.068494	0.083519	0.151272
																							0.980358	0.210865	0.518837
																							0.042203	0.09675	0.110137
																							0.169504	0.120731	0.128051
																							0.157743	0.062846	0.037155
																							0.299573	0.220789	0.039808
																							0.123842	0.051269	0.1108
																							0.179882	0.042173	0.172503
																							0.349387	0.070288	0.094877
																							0.100319	0.191019	0.155253
																							0.518891	0.078558	0.049097
																							0.47392	0.046308	0.082271
																							0.640657	0.240635	0.043789
																							0.247684	0.089308	0.054405
																							0.523042	0.047135	0.096204
																							0.187493	0.187712	0.082934
																							0.046354	0.115769	0.748399
																							0.439328	0.124038	0.076963
																							0.123842	0.102538	0.062367
																							0.266364	0.201769	0.120089
																							0.051889	0.151327	0.109473
																							0.062267	0.381212	0.077626
																							0.132836	0.124038	0.615704
																							0.050505	0.127346	0.072319
																							0.060883	0.07525	0.113454
																							0.042203	0.237327	0.070992
																							0.074028	0.37625	0.299227
																							0.08579	0.043827	0.082271
																							0.101011	0.174481	0.057722
																							0.052581	0.186885	0.072319
																							0.0595	0.103365	0.051088
																							0.04843	0.302654	0.109473
																							0.560402	0.360539	0.138003
																							0.047046	0.079385	0.043789
																							0.084406	0.316712	0.039808
																							0.03736	0.339039	0.13933
																							0.039436	0.383692	0.167195
																							0.07472	0.072769	0.123406
																							0.080947	0.048788	0.161224
																							0.083714	0.425039	0.056395
																							0.042203	0.146365	0.139993
																							0.04325	0.097577	0.080944
																							0.043971	0.038038	0.078953
																							0.037483	0.085173	0.089569
																							0.099475	0.480442	0.084261
																							0.194624	0.041346	0.043789
																							0.072083	0.047962	0.059713
																							0.047575	0.040519	0.102839
																							0.097312	0.062846	0.227572
																							0.07857	0.212519	0.043789
																							0.118216	0.080212	0.849247
																							0.073525	0.037212	0.066347
																							0.091545	0.065327	0.04578
																							0.142724	0.298519	0.064357
																							0.116774	0.184404	0.04777
																							1.0899	0.104192	0.06104
																							0.070641	0.057885	0.212312
																							0.038925	0.058712	0.046443
																							0.056225	0.048788	0.203687
																							0.083616	0.140577	0.281976
																							0.051179	0.068635	0.349651
																							0.100916	0.079385	0.117435
																							0.048296	0.136442	0.038481
																							0.278961	0.056231	0.398748
																							0.327978	0.063673	0.053741
																							0.169395	0.278673	0.040472
																							0.13912	0.054577	0.06502
																							0.048296	0.154635	0.134022
																							0.040366	0.183577	0.112127
																							0.70353	0.180269	0.103502
																							0.047575	0.171173	0.443201
																							0.046854	0.184404	0.043126
																							0.057666	0.145538	0.069001
																							0.041808	0.153808	0.134685
																							0.037483	0.111635	0.042462
																							0.083616	0.110808	0.112791
																							0.19102	0.047962	0.042462
																							0.0519	0.054577	0.055068
																							0.157141	0.076904	0.045116
																							0.085058	0.066154	0.132695
																							0.116054	0.210865	0.047107
																							0.147049	0.048788	0.380171
																							0.087941	0.1075	0.256764
																							0.050458	0.131481	0.128714
																							0.16507	0.049615	0.209658
																							0.196066	0.120731	0.135349
																							0.137678	0.1075	0.13933
																							0.284007	0.045481	0.041135
																							0.228503	0.116596	0.048692
																							0.062712	0.062846	0.092723
																							0.209761	0.144712	0.044548
																							0.099475	0.076077	0.053872
																							0.0519	0.130654	0.063197
																							0.27824	0.181923	0.092205
																							0.116054	0.047135	0.112925
																							0.250128	0.040519	0.078737
																							0.054062	0.046308	0.058016
																							0.090104	0.093442	0.041958
																							0.177324	0.203423	0.044548
																							0.170837	0.048788	0.083399
																							0.213366	0.105846	0.072521
																							0.122541	0.059538	0.333077
																							0.04325	0.114115	0.070967
																							0.167233	0.201769	0.060606
																							0.237153	0.195154	0.040404
																							0.09587	0.063673	0.146595
																							0.222736	0.045481	0.037296
																							0.145608	0.047962	0.507644
																							0.049016	0.079385	0.119659
																							0.079291	0.065327	0.096867
																							0.074245	0.062019	0.060088
																							0.335907	0.164558	0.072003
																							0.054783	0.047962	0.113443
																							0.366902	0.073596	0.055944
																							0.228503	0.083519	0.04144
																							0.159303	0.185231	0.048174
																							0.097312	0.067808	0.168351
																							0.080733	0.170346	0.05698
																							0.048296	0.206731	0.103601
																							0.064875	0.060365	0.089097
																							0.041808	0.137269	0.050764
																							0.057666	0.129	0.039886
																							1.02214	0.181923	0.143487
																							0.120379	0.065327	0.138307
																							0.337348	0.089308	0.45688
																							0.065596	0.061192	0.247606
																							0.054783	0.099231	0.20513
																							0.097312	0.245596	0.072521
																							0.059108	0.087654	0.036778
																							0.424569	0.291904	0.087025
																							0.070641	0.13975	0.047138
																							0.048296	0.058712	0.063197
																							0.420244	0.202596	0.101529
																							0.059108	0.083519	0.05957
																							0.111008	0.205904	0.046102
																							0.049737	0.234019	0.041958
																							0.0865	0.071115	0.099975
																							0.062712	0.253039	0.045584
																							0.761196	0.055404	0.239318
																							0.129749	0.037212	0.043512
																							0.333023	0.094269	0.092723
																							0.076408	0.229058	0.19218
																							0.121099	0.086827	0.048692
																							0.061991	0.160423	0.077183
																							0.054062	0.143885	0.098421
																							0.07857	0.065327	0.376071
																							0.315723	0.26875	0.145559
																							0.070641	0.143885	0.870765
																							0.134795	0.087654	0.04662
																							0.048296	0.145538	0.078737
																							0.237874	0.152154	0.067859
																							0.111729	0.309269	0.051282
																							0.08162	0.172827	0.062161
																							0.122723	0.066981	0.036778
																							0.103346	0.055404	0.059052
																							0.051673	0.07525	0.059052
																							0.055783	0.164558	0.526292
																							0.422777	0.178615	0.356387
																							0.149146	0.122385	0.099975
																							0.233115	0.063673	0.155401
																							0.197883	0.447365	0.300442
																							0.049324	0.060365	0.109299
																							0.213737	0.068635	0.224296
																							0.089253	0.057058	0.04144
																							0.054609	0.040519	0.177157
																							0.399877	0.052096	0.383323
																							0.237812	0.062019	0.088579
																							0.049324	0.062846	0.094795
																							0.233115	0.045481	0.068377
																							0.038167	0.077731	0.106191
																							0.167349	0.041346	0.046102
																							0.081032	0.041346	0.871283
																							0.086904	0.052923	0.081327
																							0.117438	0.066981	0.217562
																							0.03758	0.047135	0.054908
																							0.065765	0.141404	0.758876
																							0.129182	0.039692	0.078219
																							0.092189	0.159596	0.204094
																							0.174396	0.374596	0.05439
																							0.041691	0.082692	1.01581
																							0.544326	0.051269	0.084953
																							0.133292	0.050442	0.237246
																							0.132118	0.037212	0.255894
																							0.044626	0.037212	0.053872
																							0.041691	0.039692	0.051282
																							0.38461	0.056231	0.063197
																							0.103933	0.048788	0.140379
																							0.112153	0.070288	0.095831
																							0.465055	0.039692	0.433052
																							0.065765	0.068635	0.098939
																							0.045801	0.083519	0.073039
																							0.039342	0.066981	0.110335
																							0.042278	0.069462	0.040504
																							0.08162	0.52675	0.100528
																							0.102171	0.095923	0.164456
																							0.30299	0.083519	0.181048
																							0.498525	0.157942	0.183
																							0.282439	0.167865	0.753472
																							0.107456	0.162077	0.220088
																							0.293595	0.127346	0.1342
																							0.431585	0.22575	0.042456
																							0.088666	0.110808	0.120536
																							0.036993	0.140577	0.147864
																							0.124484	0.052096	0.14884
																							0.038755	0.038865	0.063928
																							0.103933	0.040519	0.454816
																							0.417493	0.105846	0.206912
																							0.052847	0.074423	0.091744
																							0.126246	0.151327	0.057584
																							0.039342	0.16125	0.081008
																							0.123897	0.243115	0.488488
																							0.216673	0.344	0.213744
																							0.073986	0.079385	0.071736
																							0.086904	0.052096	0.040992
																							0.199058	0.224923	0.156648
																							0.267759	0.041346	0.101016
																							0.135054	0.061192	0.03904
																							0.337047	0.056231	0.222528
																							0.187314	0.086	1.32492
																							0.121548	0.192673	0.066368
																							0.049324	0.038865	0.074664
																							0.051086	0.080212	0.081008
																							0.03758	0.119904	0.066368
																							0.520251	0.057058	0.24644
																							0.050498	0.105846	0.127856
																							0.132705	0.066981	0.325984
																							0.036993	0.050442	0.503616
																							0.166762	0.07525	0.503616
																							0.902512	0.044654	0.460672
																							0.052847	0.334904	0.05368
																							0.065178	0.058712	0.11224
																							0.190837	0.171173	0.044408
																							0.17557	0.067808	0.249856
																							0.281852	0.051269	1.03895
																							0.058132	0.039692	0.04148
																							0.243684	0.473827	0.3782
																							0.144449	0.087654	0.077104
																							0.335286	0.071942	0.17568
																							0.045214	0.101712	0.203984
																							0.174983	0.11825	0.210328
																							0.08984	0.174481	0.040504
																							0.039929	0.054577	0.066368
																							0.114502	0.060365	0.05124
																							0.253079	0.116596	0.047824
																							0.113328	0.086827	0.418704
																							0.055196	0.211692	0.14884
																							0.211389	0.136442	0.068808
																							0.073986	0.100058	0.217648
																							0.070463	0.067808	0.195688
																							0.043452	0.057058	0.144936
																							0.103933	0.138096	0.290848
																							0.076614	0.046308	0.048312
																							0.497304	0.038038	0.453352
																							0.045147	0.043	0.291336
																							0.121077	0.152154	0.554368
																							0.055408	0.052923	0.067832
																							0.280461	0.228231	0.2318
																							0.147071	0.071115	0.268888
																							0.481571	0.052096	0.133224
																							0.05746	0.179442	0.077104
																							0.038991	0.097577	0.06344
																							0.194954	0.065327	0.093696
																							0.096451	0.045481	0.095648
																							0.498672	0.076077	0.105408
																							0.164172	0.052923	0.301584
																							0.274988	0.07525	0.65636
																							0.10808	0.084346	0.061976
																							0.07935	0.040519	0.219112
																							0.047199	0.1075	0.058072
																							0.360494	0.071942	0.079544
																							0.317399	0.042173	0.125416
																							0.080034	0.230712	0.09028
																							0.73467	0.121558	0.050752
																							0.064985	0.077731	0.10736
																							0.146387	0.095923	0.14396
																							0.080034	0.037212	0.048312
																							0.036939	0.1075	0.527528
																							0.491832	0.252212	0.076128
																							0.836593	0.126519	0.083448
																							0.099187	0.070288	0.044408
																							0.57939	0.146365	0.066856
																							0.329712	0.048788	0.072712
																							0.099871	0.241462	0.283528
																							0.197006	0.162077	0.218624
																							0.14023	0.039692	0.057584
																							0.361862	0.117423	0.666608
																							0.9864	0.045481	0.04148
																							0.087558	0.098404	1.33273
																							0.427531	0.084346	0.114192
																							0.041043	0.043827	0.197152
																							0.061565	0.082692	0.053192
																							0.054724	0.131481	0.366488
																							0.149807	0.211692	0.173728
																							0.039675	0.076089	0.049776
																							0.402905	0.041611	0.137616
																							0.066353	0.175956	0.11956
																							0.097819	0.079656	0.098576
																							0.038991	0.041611	0.102968
																							0.093715	0.105811	0.23424
																							0.112184	0.143856	0.116632
																							0.217528	0.175956	0.225456
																							0.132706	0.136722	0.289872
																							0.374859	0.200922	0.120048
																							1.66977	0.073711	0.133712
																							0.048568	0.049933	0.78812
																							0.267464	0.090356	0.162992
																							0.24831	0.103433	0.284992
																							0.599912	0.046367	0.360632
																							0.229157	0.038044	0.127368
																							0.084822	0.065389	0.04148
																							0.231209	0.047556	0.061488
																							0.071825	0.093922	0.089792
																							0.223684	0.072522	0.07076
																							0.051988	0.041611	0.174704
																							0.480887	0.1284	0.17324
																							0.070457	0.083222	0.079544
																							0.220948	0.048744	0.051728
																							0.391277	0.038044	0.088816
																							0.191534	0.0642	0.04148
																							0.422743	0.078467	0.05368
																							0.253783	0.0428	0.075152
																							0.112184	0.1391	0.040504
																							0.109448	0.099867	0.042456
																							0.27362	0.129589	0.289874
																							0.05746	0.111756	0.042421
																							0.125865	0.127211	0.060489
																							0.058828	0.036856	0.113907
																							0.069089	0.162878	0.179109
																							0.107396	0.131967	0.070701
																							0.058828	0.072522	0.450915
																							0.10466	0.057067	0.186965
																							0.05062	0.084411	0.06913
																							0.101239	0.120078	0.106051
																							0.229841	0.164067	0.504334
																							0.077982	0.068956	0.040849
																							0.058144	0.076089	0.060489
																							0.066353	0.0535	0.270235
																							0.320135	0.148611	0.345649
																							0.058144	0.317433	0.190107
																							0.049252	0.0642	0.044777
																							0.05062	0.036856	0.047134
																							0.071825	0.107	0.062845
																							0.639587	0.357856	0.04792
																							0.11492	0.173578	0.037707
																							0.069773	0.058256	0.070701
																							0.1587	0.0428	0.126476
																							0.300298	0.059444	0.06206
																							0.036939	0.047556	0.041635
																							0.063617	0.049933	0.081699
																							0.046515	0.055878	0.069915
																							0.098503	0.140289	0.040849
																							0.161436	0.060633	0.093482
																							0.06088	0.0642	0.059703
																							0.129285	0.127211	0.043992
																							0.178537	0.076089	0.069915
																							0.151859	0.103433	0.627667
																							0.051988	0.221133	0.489408
																							0.237365	0.095111	1.07623
																							0.240102	0.052311	0.359004
																							0.065669	0.250856	0.082484
																							0.094399	0.179522	0.302443
																							0.253099	0.058256	0.058132
																							0.069773	0.233022	0.095839
																							0.053356	0.084411	0.693655
																							0.047884	0.304356	0.055775
																							0.053356	0.130778	0.285161
																							0.148439	0.054689	0.14533
																							0.077298	0.043989	0.15947
																							0.107772	0.103433	0.847626
																							0.105836	0.078467	0.52083
																							0.049691	0.077278	0.058132
																							0.100028	0.140289	0.587604
																							0.08583	0.101056	0.053419
																							0.096156	0.048744	0.37393
																							0.311054	0.153367	0.054204
																							0.03872	0.202111	0.651234
																							0.061953	0.0963	0.563251
																							0.223933	0.164067	0.081699
																							0.172951	0.045178	0.195606
																							0.493685	0.038044	0.194035
																							1.08159	0.049933	0.192464
																							0.162626	0.153367	0.611956
																							1.25648	0.068956	0.088769
																							0.428506	0.179522	0.195606
																							0.566608	0.261556	0.058132
																							0.040011	0.049933	0.3048
																							0.112289	0.104622	0.213674
																							0.044528	0.067767	0.09741
																							0.166498	0.057067	0.06913
																							0.082603	0.045178	0.051847
																							0.059371	0.0535	1.27576
																							0.281368	0.131967	0.069915
																							0.072923	0.259178	0.248239
																							0.28524	0.190222	0.099767
																							0.156818	0.110567	0.22153
																							0.140039	0.039233	0.190107
																							0.347193	0.045178	0.768284
																							0.061307	0.083222	0.102124
																							0.03743	0.1605	0.043206
																							0.149073	0.0963	0.060489
																							0.070987	0.060633	0.052633
																							0.03872	0.2247	0.066773
																							0.075505	0.082033	0.071487
																							0.224578	0.039233	0.147686
																							0.081313	0.137911	0.284375
																							0.500784	0.060633	0.065202
																							0.04711	0.136722	0.08327
																							0.050337	0.072522	0.086412
																							0.114225	0.154556	0.042421
																							0.3046	0.190222	0.150829
																							0.105836	0.180711	0.058132
																							0.388495	0.036856	0.146115
																							0.098737	0.071333	0.275734
																							0.092929	0.036856	0.10448
																							0.06647	0.073711	0.065202
																							0.982207	0.059444	0.208175
																							0.045819	0.068956	0.038493
																							0.108417	0.068956	0.524758
																							0.126487	0.147422	0.042421
																							0.042592	0.048744	0.046348
																							0.064534	0.080844	0.101338
																							0.077441	0.071333	0.043992
																							0.189085	0.086789	0.135903
																							0.068406	0.170011	0.051847
																							0.178759	0.1284	0.04792
																							0.145201	0.126022	0.117049
																							0.045174	0.052311	0.073058
																							0.186503	0.209244	0.156328
																							0.453674	0.093922	0.040064
																							0.91122	0.166444	0.041635
																							0.116161	0.054689	0.057346
																							0.907348	0.041611	0.053419
																							0.311699	0.159311	0.048705
																							0.366553	0.129589	0.582105
																							0.234258	0.039233	0.043206
																							0.093574	0.061822	0.056561
																							0.144556	0.499333	0.269449
																							0.125841	0.215189	0.25688
																							0.11487	0.054689	0.053419
																							0.045174	0.152178	0.132761
																							0.244584	0.174767	0.243526
																							0.049046	0.093922	0.258451
																							0.112934	0.367367	0.913614
																							0.056145	0.052311	0.053419
																							0.5124	0.054689	0.043992
																							0.367844	0.335267	0.109194
																							0.125196	0.127211	0.200319
																							0.221352	0.130778	0.065988
																							0.08454	0.0749	0.051062
																							0.044528	0.047556	0.288303
																							0.591777	0.216378	0.091126
																							0.158108	0.183089	0.084056
																							0.114225	0.129589	0.038493
																							0.237485	0.040422	0.704653
																							0.484005	0.090356	0.249025
																							0.208445	0.052311	0.038493
																							0.138748	0.257989	0.04792
																							0.19941	0.260367	0.454843
																							0.078731	0.040422	0.127262
																							0.562091	0.145044	0.062845
																							0.138103	0.071333	0.059703
																							0.306536	0.057067	0.051847
																							0.116806	0.097489	0.044777
																							0.419471	0.060633	0.066773
																							0.421407	0.133156	0.044777
																							0.145847	0.066578	0.045563
																							0.17037	0.211622	0.041635
																							0.331059	0.043989	0.086412
																							0.219416	0.068956	0.197963
																							0.099382	0.140289	0.05499
																							0.454965	0.114133	0.158684
																							0.44722	0.036856	0.321297
																							0.167143	0.077278	0.100553
																							0.302664	0.084411	0.041635
																							0.091638	0.131967	0.309513
																							0.081313	0.130778	0.102909
																							0.11358	0.040422	0.043992
																							0.242648	0.0642	0.240383
																							0.310408	0.087978	0.045563
																							0.294275	0.048744	0.036922
																							0.106481	0.134344	0.084841
																							0.123905	0.174767	0.200319
																							0.054209	0.082033	0.052633
																							0.100128	0.099867	0.073843
																							0.092523	0.109378	0.069915
																							0.043093	0.255611	0.068344
																							0.221169	0.061822	0.056856
																							0.17871	0.116511	0.103098
																							0.149558	0.066578	0.075808
																							0.157163	0.253233	0.305504
																							0.047529	0.095111	0.074291
																							0.083018	0.082033	0.05534
																							0.327	0.091544	0.256988
																							0.055134	0.212811	0.108405
																							0.162866	0.049933	0.151615
																							0.14132	0.047556	0.17739
																							0.204692	0.142667	0.095518
																							0.380233	0.043989	0.084146
																							0.083018	0.057067	0.112195
																							0.044361	0.063011	0.03942
																							0.285808	0.173578	0.097792
																							0.118506	0.093922	0.065195
																							0.136884	0.167633	0.050033
																							0.040558	0.244911	0.072017
																							0.137518	0.284144	0.166019
																							0.286442	0.078467	0.049275
																							0.212297	0.059444	0.133421
																							0.076047	0.218756	0.051549
																							0.077948	0.199733	0.086421
																							0.16857	0.073711	0.037904
																							0.181244	0.183089	0.11826
																							0.201523	0.127211	0.043968
																							0.134349	0.107	0.04321
																							0.147023	0.089167	0.084146
																							0.282006	0.041611	0.090969
																							0.073512	0.179522	0.061404
																							0.062105	0.059444	0.037146
																							0.160965	0.040422	0.126599
																							0.047529	0.036856	0.097792
																							0.321931	0.111756	0.073533
																							0.083651	0.152178	0.068985
																							0.198355	0.102244	0.043968
																							0.254756	0.0642	0.120534
																							0.067174	0.156933	0.05534
																							0.128012	0.079656	0.05534
																							0.041192	0.073711	0.137212
																							0.194553	0.047556	0.186487
																							0.61471	0.049933	0.038662
																							0.112802	0.061822	0.068227
																							0.074145	0.1284	0.081114
																							0.079215	0.101056	0.084146
																							0.050698	0.046367	0.170567
																							0.103297	0.137911	0.093243
																							0.109	0.059444	0.115986
																							0.043093	0.307922	0.140244
																							0.040558	0.143856	0.047759
																							0.057035	0.040422	0.064436
																							0.057035	0.052311	0.084904
																							0.076047	0.039233	0.131905
																							0.251587	0.335267	0.195584
																							0.181878	0.0535	0.046243
																							0.044994	0.337644	0.165261
																							0.108366	0.105811	0.045485
																							0.040558	0.092733	0.063678
																							0.065273	0.087978	0.078082
																							0.297215	0.121267	0.349473
																							0.45628	0.115322	0.062162
																							0.111535	0.084411	0.079598
																							0.107099	0.038044	0.058372
																							0.851722	0.055878	0.05534
																							0.079215	0.257989	0.11826
																							0.231942	0.039233	0.07884
																							0.15843	0.036856	0.090969
																							0.285808	0.060633	0.143276
																							0.358686	0.1819	0.047759
																							0.088721	0.194978	0.159954
																							0.046895	0.1177	0.175874
																							0.181878	0.059444	0.072775
																							0.472756	0.121267	0.266085
																							0.048163	0.068956	0.070501
																							0.120407	0.084411	0.138728
																							0.118506	0.123644	0.073533
																							0.145122	0.665778	0.256988
																							0.110901	0.107	0.053823
																							0.431564	0.048744	0.057614
																							0.077948	0.186656	0.065195
																							0.79342	0.040422	0.088695
																							0.056401	0.230644	0.330521
																							0.039291	0.043989	0.068985
																							0.30989	0.077278	0.297166
																							0.245884	0.448211	0.047759
																							0.057669	0.112944	0.090211
																							0.161599	0.0749	0.038662
																							0.130547	0.309111	0.072017
																							0.039291	0.112944	0.057614
																							0.137518	0.041611	0.341134
																							0.742088	0.252044	0.426039
																							0.160332	0.055878	0.046243
																							0.112169	0.038044	0.39799
																							0.436634	0.122456	0.064436
																							0.145122	0.072522	0.060646
																							0.043727	0.1605	1.09921
																							0.065907	0.036856	0.357812
																							0.148291	0.124833	0.053065
																							0.243983	0.065389	0.050033
																							0.174273	0.043989	0.325214
																							0.123576	0.323378	0.350231
																							0.048163	0.539756	0.040936
																							0.382768	0.040422	0.150857
																							0.23321	0.052311	0.936981
																							0.619146	0.303167	0.072017
																							1.23829	0.061822	0.057614
																							0.063372	0.077278	0.083388
																							0.066541	0.057067	0.037904
																							0.065907	0.115322	0.048517
																							0.038657	0.049933	0.272907
																							1.69901	0.090356	0.06292
																							0.367559	0.373311	0.404812
																							0.119773	0.041611	0.178906
																							0.345378	0.061822	0.053823
																							0.320663	0.121267	0.058372
																							0.240814	0.408978	0.050791
																							0.119773	0.040422	0.121292
																							0.110901	0.048744	0.172841
																							0.045628	0.233022	0.066711
																							0.048797	0.0535	0.043968
																							0.736385	0.067767	0.047001
																							0.041826	0.134344	0.070501
																							0.266797	0.103433	0.203922
																							0.045628	0.108189	0.219084
																							0.06464	0.082033	0.075808
																							0.050185	0.058256	0.071259
																							0.289581	0.043989	0.818722
																							0.143095	0.076089	0.050791
																							0.189889	0.077278	0.160712
																							0.14513	0.131967	0.459394
																							0.174291	0.038044	0.073533
																							0.129532	0.060633	0.162986
																							0.07799	0.038044	0.256988
																							0.038656	0.048744	0.138728
																							0.165475	0.103433	0.178906
																							0.091554	0.0642	0.04321
																							0.058323	0.090356	0.084146
																							0.073921	0.510033	0.134937
																							0.07053	0.259178	0.344924
																							0.092232	0.104622	0.576896
																							0.048829	0.051122	0.11826
																							0.052898	0.133156	0.074291
																							0.149199	0.159311	0.170567
																							0.056289	0.189033	0.085663
																							0.041369	0.099867	0.144034
																							0.071887	0.058256	0.209987
																							0.050185	0.063011	0.648155
																							0.104439	0.150989	0.104614
																							0.300432	0.040422	0.052307
																							0.042725	0.633678	0.591299
																							0.207522	0.134344	0.10234
																							0.233971	0.041611	0.103098
																							0.081381	0.557589	0.080356
																							0.289581	0.1926	0.081872
																							0.408262	0.071333	0.578412
																							0.136992	0.236589	0.05534
																							0.04476	0.104622	0.190277
																							0.081381	0.049933	0.085663
																							0.071209	0.166444	0.148583
																							0.194637	0.109378	0.060646
																							0.519483	0.129589	0.040178
																							0.180395	0.070144	0.209987
																							0.684958	0.055878	0.061404
																							0.120715	0.059444	0.270633
																							1.21801	0.091544	0.259262
																							0.12275	0.040422	0.049275
																							0.195315	0.129589	0.119776
																							0.047472	0.049933	0.964272
																							0.048151	0.115322	0.083388
																							0.061036	0.123644	0.631477
																							0.065105	0.076089	0.074291
																							0.147842	0.234211	0.276698
																							0.040691	0.0535	0.040178
																							0.440815	0.052311	0.040178
																							0.081381	0.072522	0.168293
																							0.192602	0.108189	0.107647
																							0.092232	0.114133	0.221358
																							0.047472	0.058256	0.339618
																							0.177682	0.1926	0.310811
																							0.050185	0.068956	0.037904
																							0.173613	0.055878	0.321424
																							0.175648	0.205678	0.03942
																							0.134279	0.141478	0.050033
																							0.322134	0.208056	0.404054
																							0.4164	0.063011	0.135696
																							0.183786	0.048744	0.072017
																							0.059001	0.071333	0.05534
																							0.326203	0.170011	0.172083
																							0.045438	0.191411	0.042452
																							0.455056	0.3531	0.057614
																							0.098336	0.057067	0.089453
																							0.444884	0.049933	0.409361
																							0.080703	0.052311	0.202406
																							0.046794	0.253233	0.191035
																							0.099014	0.099867	0.046243
																							0.286191	0.105811	0.112195
																							0.057645	0.198544	0.07884
																							0.058323	0.1177	0.053823
																							0.996241	0.087978	0.061404
																							0.045438	0.036856	0.053065
																							1.13798	0.110567	0.040178
																							1.18206	0.387578	0.213777
																							0.106474	0.036856	0.088695
																							1.64187	0.097489	0.127357
																							0.13021	0.233022	0.040936
																							0.175648	0.071333	0.037904
																							0.142417	0.0428	0.085085
																							0.083416	0.066578	0.063629
																							0.752098	0.048744	0.038473
																							0.072565	0.047556	0.041433
																							0.058323	0.045178	0.120598
																							0.20074	0.041611	0.103582
																							0.07053	0.129589	0.171649
																							0.23804	0.080844	0.040693
																							0.041369	0.080844	0.2227
																							0.478793	0.123644	0.071767
																							0.054932	0.048744	0.483134
																							0.054932	0.043989	0.100622
																							0.051541	0.065389	0.132436
																							0.079347	0.0642	0.069548
																							0.120715	0.090356	0.149453
																							0.118681	0.187844	0.231579
																							0.161406	0.043989	0.941852
																							0.046794	0.092733	0.456498
																							0.05222	0.0642	0.071767
																							0.144452	0.127211	0.395089
																							0.058323	0.183089	0.073987
																							0.045438	0.057067	0.207903
																							0.046794	0.114133	0.518647
																							1.10271	0.076089	0.074727
																							0.101048	0.038044	0.125778
																							0.046794	0.052311	0.341079
																							0.046794	0.040422	0.045132
																							0.07053	0.048744	0.142795
																							0.246178	0.112944	0.079166
																							0.082059	0.248478	0.157592
																							0.507954	0.068956	0.038473
																							0.120715	0.046367	0.076206
																							0.125463	0.194978	0.260434
																							0.079347	0.156933	0.295947
																							0.148521	0.036856	0.801277
																							0.094945	0.063011	0.50385
																							0.042047	0.193789	0.042912
																							0.119359	0.065389	0.661442
																							0.223798	0.209244	0.103582
																							0.20074	0.072522	0.040693
																							0.948091	0.093922	0.492012
																							0.062392	0.036856	0.271532
																							0.128854	0.045178	0.048091
																							0.122072	0.103433	0.231579
																							0.042047	0.1177	0.05845
																							0.039334	0.205678	0.1095
																							0.038656	0.199733	0.095443
																							0.090197	0.039233	0.362535
																							0.068496	0.077278	0.156852
																							0.720902	0.136722	0.27967
																							0.250247	0.036856	0.232319
																							0.367572	0.066578	0.068068
																							0.4164	0.048744	0.194585
																							0.074599	0.091544	0.195325
																							0.175648	0.055878	0.266352
																							0.040012	0.109378	0.247856
																							0.059001	0.098678	0.216041
																							0.073243	0.052311	0.069548
																							0.038656	0.092733	0.062889
																							0.056967	0.048992	0.05697
																							0.170901	0.08077	0.064368
																							0.042047	0.079446	0.304826
																							0.136992	0.05164	0.262653
																							0.088841	0.038399	0.05623
																							0.537794	0.156245	0.304826
																							0.12275	0.182727	0.05697
																							0.227867	0.066205	0.11024
																							0.387239	0.284683	0.116159
																							0.071887	0.041047	0.537144
																							0.269914	0.101956	0.120598
																							0.046116	0.254228	0.042172
																							0.045438	0.078122	0.264873
																							0.061036	0.099308	0.052531
																							0.128854	0.11917	0.418765
																							0.049507	0.095336	0.052531
																							0.450309	0.233043	0.042912
																							0.056967	0.066205	0.062149
																							0.274662	0.088715	0.060669
																							0.062392	0.135059	0.065108
																							0.058323	0.184051	0.120598
																							0.374353	0.076798	0.038473
																							0.105796	0.101956	0.625188
																							0.061714	0.144328	1.29181
																							0.07053	0.107253	0.066588
																							0.826019	0.084743	0.05327
																							0.214304	0.052964	0.253775
																							0.162084	0.062233	0.190886
																							0.404193	0.092687	0.2264
																							0.189211	0.079446	0.068808
																							0.132244	0.079446	0.215302
																							0.066461	0.070178	0.158332
																							0.124784	0.058261	0.497191
																							0.046116	0.072826	0.063629
																							0.086128	0.137707	0.051791
																							0.127497	0.1483	0.05697
																							0.158015	0.088715	0.135396
																							0.10783	0.041047	0.063629
																							0.050863	0.25158	0.05845
																							0.072565	0.12579	0.202724
																							0.127497	0.149624	0.299646
																							0.038357	0.039723	0.125778
																							0.077825	0.060909	0.105801
																							0.039469	0.127114	0.069548
																							0.16788	0.127114	0.042172
																							0.15843	0.037075	0.100622
																							0.053922	0.056937	0.236018
																							0.045027	0.072826	0.068808
																							0.070043	0.037075	0.079166
																							0.057813	0.15492	0.05549
																							0.156206	0.10328	0.088784
																							0.078381	0.08077	0.05475
																							0.09617	0.04502	0.092533
																							0.05281	0.105928	0.071104
																							0.227917	0.123142	0.13052
																							0.112847	0.150948	0.14513
																							0.126188	0.173458	0.052597
																							0.075602	0.099308	0.144156
																							0.047807	0.180078	0.14513
																							0.056701	0.15492	0.318507
																							0.068375	0.071502	0.037987
																							0.058369	0.121818	0.063312
																							0.086164	0.121818	0.622404
																							0.175107	0.095336	0.138312
																							0.058925	0.041047	0.232793
																							0.083384	0.124466	0.090585
																							0.038913	0.233043	0.082792
																							0.07171	0.259525	0.038961
																							0.432486	0.101956	0.067208
																							0.081717	0.169486	0.126624
																							0.041136	0.071502	0.150974
																							0.664294	0.135059	0.13052
																							0.050586	0.071502	0.087662
																							0.065596	0.078122	0.432468
																							0.202346	0.104604	0.190909
																							0.240702	0.299248	0.456819
																							0.067819	0.218478	0.046753
																							0.079493	0.111225	0.116883
																							0.046695	0.047668	0.163637
																							0.051698	0.288655	0.222078
																							0.048919	0.31911	0.246429
																							0.248485	0.124466	0.232793
																							0.32631	0.398556	0.100325
																							0.047251	0.097984	0.146104
																							0.038913	0.037075	0.038961
																							0.053366	0.153596	0.152922
																							0.64595	0.060909	0.052597
																							0.055034	0.08077	0.098377
																							0.162877	0.153596	0.059416
																							0.081161	0.042371	0.041883
																							0.06504	0.113873	0.248377
																							0.28295	0.099308	0.492858
																							0.123409	0.11917	0.069156
																							0.038357	0.060909	0.247403
																							0.118961	0.403852	0.283442
																							0.160098	0.376046	0.194806
																							0.038357	0.172134	1.29156
																							0.26405	0.139031	0.106169
																							0.354661	0.156245	0.069156
																							0.161765	0.091363	0.059416
																							0.047251	0.327054	0.129546
																							0.061704	0.042371	0.221104
																							0.135082	0.071502	0.460715
																							0.091167	0.264821	0.297078
																							0.078937	0.248932	0.116883
																							0.665962	0.276738	0.041883
																							0.670409	0.086067	0.189935
																							0.281283	0.157569	0.245455
																							0.090611	0.254228	0.13539
																							0.055589	0.050316	0.081818
																							0.103952	0.054288	0.094481
																							0.162877	0.058261	0.304871
																							0.058369	0.242311	0.117857
																							0.071155	0.072826	0.178247
																							0.062816	0.060909	0.653573
																							0.070599	0.108577	0.221104
																							0.056145	0.12579	0.076948
																							0.400244	0.101956	0.049675
																							0.145089	0.042371	0.050649
																							0.581466	0.052964	0.529871
																							0.244594	0.116521	0.06526
																							0.131191	0.156245	0.174351
																							0.182889	0.235691	0.219156
																							0.243482	0.357509	0.045779
																							0.291289	0.05164	0.143182
																							0.386347	0.101956	0.042857
																							0.214575	0.087391	0.201624
																							0.530879	0.066205	0.166559
																							0.072266	0.11917	0.246429
																							0.214575	0.115197	0.059416
																							0.041136	0.137707	0.165585
																							0.22069	0.160217	0.266884
																							0.11507	0.1483	0.093507
																							0.187892	0.12579	0.037987
																							0.641502	0.078122	0.250325
																							0.075602	0.307193	0.081818
																							0.037245	0.066205	0.116883
																							0.172883	0.066205	0.063312
																							0.173439	0.04502	0.150974
																							0.06504	0.109901	0.107143
																							0.045583	0.043696	0.161689
																							0.183445	0.09666	0.319481
																							0.063928	0.10328	0.217208
																							0.425259	0.071502	0.091559
																							0.090055	0.050316	0.112013
																							0.268497	0.050316	0.086688
																							0.06226	0.190671	0.119805
																							0.052254	0.095336	0.092156
																							0.058925	0.062233	0.179358
																							0.050097	0.146976	0.04261
																							0.241568	0.082095	0.057474
																							0.122695	0.076798	0.069365
																							0.09892	0.223774	0.059456
																							0.153262	0.1483	0.166476
																							0.146045	0.11917	0.071347
																							0.1176	0.04502	0.115939
																							0.09425	0.050316	0.249714
																							0.09892	0.168161	0.072338
																							0.042455	0.059585	0.146657
																							0.132884	0.105928	0.052519
																							0.042879	0.238339	0.449882
																							0.110807	0.038399	0.410244
																							0.230105	0.12579	0.041619
																							0.083636	0.062233	0.089184
																							0.151988	0.039723	0.197195
																							0.084061	0.07415	0.112966
																							0.129487	0.136383	0.741215
																							0.161753	0.161541	0.052519
																							0.107411	0.101956	0.177376
																							0.488231	0.082095	0.056483
																							0.257277	0.292627	0.076302
																							0.039483	0.039723	0.046574
																							0.05604	0.066205	0.039637
																							0.054342	0.143003	0.068374
																							0.142224	0.426362	0.056483
																							0.171518	0.095336	0.048556
																							0.190622	0.04502	0.52321
																							0.208029	0.038399	0.04261
																							0.16982	0.071502	0.060447
																							0.321808	0.050316	0.759051
																							0.044153	0.111225	0.153594
																							0.329025	0.046344	0.140712
																							0.061984	0.197292	0.634194
																							1.21973	0.076798	0.055492
																							0.116326	0.091363	0.046574
																							0.090004	0.059585	0.131794
																							1.54111	0.156245	0.038646
																							0.228407	0.055612	0.047565
																							0.390585	0.086067	0.433036
																							0.078117	0.164189	0.065401
																							0.101467	0.041047	0.265569
																							0.27256	0.112549	0.457809
																							0.078966	0.07415	0.069365
																							0.05222	0.425038	0.092156
																							0.32945	0.05164	0.058465
																							0.050946	0.048992	0.222959
																							0.135856	0.066205	0.051528
																							0.113779	0.178754	0.126839
																							0.262796	0.243636	0.144676
																							0.164725	0.184051	0.124857
																							0.157932	0.060909	0.071347
																							0.09425	0.055612	0.141703
																							0.067503	0.072826	0.251696
																							0.05689	0.133735	0.083238
																							0.042879	0.262173	0.069365
																							0.071324	0.107253	0.17044
																							0.045851	0.037075	0.17044
																							0.057739	0.038399	0.068374
																							0.107835	0.082095	0.515283
																							0.091703	0.070178	0.161521
																							0.070475	0.22245	0.375562
																							0.059012	0.090039	0.731305
																							1.30506	0.266145	0.659958
																							0.579085	0.123142	0.066392
																							0.292939	0.237015	0.055492
																							0.037785	0.157569	0.151612
																							0.354498	0.100632	0.038646
																							0.0709	0.060909	0.875981
																							0.053493	0.047668	0.04261
																							0.668664	0.259525	0.059456
																							0.104864	0.108577	0.452854
																							0.095099	0.121818	0.04261
																							0.077268	0.129762	0.09612
																							0.573565	0.356185	0.043601
																							0.03736	0.039723	0.20314
																							0.250059	0.312489	0.065401
																							0.093825	0.233043	0.038646
																							0.149441	0.075474	0.048556
																							0.17364	0.127114	0.18134
																							0.114628	0.043696	0.172422
																							0.037785	0.043696	0.528165
																							0.156659	0.097984	0.062429
																							0.184679	0.090039	0.067383
																							0.094674	0.292627	0.044592
																							0.045002	0.358833	0.392408
																							0.113355	0.042371	0.043601
																							0.17449	0.158893	0.050537
																							0.049672	0.09666	0.073329
																							0.076843	0.04502	0.337907
																							0.416907	0.139031	0.199177
																							0.049672	0.124466	0.334934
																							0.181282	0.063557	0.110984
																							0.04203	0.136383	0.365653
																							0.177461	0.083419	0.08522
																							0.863532	0.079446	0.118911
																							0.268315	0.042371	0.265569
																							0.142224	0.04502	1.55873
																							0.075994	0.052964	0.161521
																							0.091703	0.094012	0.039637
																							0.122695	0.132411	0.331961
																							0.148592	0.05164	0.284397
																							0.177886	0.050316	0.581675
																							0.056465	0.05164	0.100084
																							0.33879	0.095336	0.539065
																							0.308222	0.123142	0.332952
																							0.09425	0.055612	0.063419
																							0.047974	0.197292	0.08522
																							0.047974	0.099308	0.121884
																							0.053493	0.04502	0.556902
																							0.038209	0.063557	0.478619
																							0.087033	0.054288	1.12074
																							0.095099	0.300572	0.055492
																							0.044043	0.09666	0.124857
																							0.065049	0.289979	0.043601
																							0.074535	0.058261	0.104048
																							0.159234	0.071502	0.226923
																							0.216829	0.188023	0.066392
																							0.203955	0.084743	0.587621
																							0.160589	0.218478	0.734278
																							0.05624	0.131087	0.09612
																							0.128742	0.578634	0.369616
																							0.215474	0.391935	0.144676
																							0.616607	0.194644	0.198186
																							0.055562	0.046344	0.19224
																							0.130097	0.076798	0.200168
																							0.107059	0.254228	0.065401
																							0.102994	0.213181	0.118911
																							0.064371	0.041047	0.091165
																							0.163977	0.039723	0.098102
																							0.187015	0.050316	0.264578
																							0.065049	0.038399	0.16053
																							0.483122	0.063557	0.090175
																							0.174141	0.411797	0.206113
																							0.044043	0.076798	0.39439
																							0.039978	0.038399	0.549965
																							0.272391	0.09666	0.043601
																							0.05624	0.037075	0.067383
																							0.059628	0.135059	0.06441
																							0.344216	0.050316	0.041619
																							0.072502	0.140355	0.173413
																							0.071147	0.113873	0.271514
																							0.067759	0.064881	0.126839
																							0.369964	0.05164	0.040628
																							0.397068	0.043696	0.101075
																							0.685044	0.131087	0.129812
																							0.046076	0.064881	0.098102
																							0.056918	0.058261	0.325025
																							0.109092	0.041047	0.046574
																							0.064371	0.043696	0.080265
																							0.045399	0.152272	0.051528
																							0.224282	0.043696	0.081256
																							0.079956	0.056937	0.156567
																							0.077245	0.198616	0.194222
																							0.302883	0.04502	0.174403
																							0.195824	0.112549	0.07432
																							0.077245	0.070178	0.046831
																							0.26155	0.152272	0.085621
																							0.316435	0.153596	0.0544
																							0.460761	0.078122	0.06528
																							0.316435	0.162865	0.074268
																							0.590181	0.174782	0.137655
																							0.209375	0.100632	0.259227
																							0.509548	0.092687	0.163672
																							0.431625	0.15492	0.038316
																							0.067759	0.127114	0.19442
																							0.040655	0.101956	0.045885
																							0.114513	0.097984	0.160834
																							0.037945	0.209209	1.36047
																							0.138906	0.086067	0.045885
																							0.577307	0.087391	0.101231
																							0.154491	0.178754	0.039262
																							0.138906	0.062233	0.279095
																							0.046076	0.056937	0.060549
																							0.100961	0.050316	0.047777
																							0.05353	0.156245	0.122518
																							0.180917	0.072826	0.575692
																							0.203277	0.099308	0.075687
																							0.068437	0.063557	0.140493
																							0.0786	0.041047	0.285717
																							0.155168	0.11917	0.047777
																							0.434335	0.054288	1.15422
																							0.065049	0.082095	1.33824
																							0.046754	0.120494	0.236994
																							0.082666	0.143003	0.6159
																							0.422139	0.111225	0.412019
																							0.066404	0.223774	1.97684
																							0.250031	0.10328	0.071902
																							0.051497	0.047668	0.634822
																							0.071147	0.133735	0.111165
																							0.91949	0.037075	0.040682
																							0.088087	0.152272	0.122045
																							0.35438	0.050316	1.19774
																							0.050142	0.242311	0.28146
																							0.113835	0.112549	0.121099
																							0.077923	0.201264	0.370865
																							0.174818	0.463437	0.062441
																							0.086054	0.124466	0.078525
																							0.362511	0.076798	0.037843
																							0.11248	0.092687	0.152792
																							0.072502	0.156245	0.092243
																							0.038623	0.202588	0.197731
																							0.048786	0.17081	0.122518
																							0.05624	0.064881	0.144751
																							0.051497	0.076798	0.057711
																							0.05353	0.141679	0.273891
																							0.195146	0.10257	0.379852
																							0.56511	0.171693	2.04496
																							0.217506	0.1048	0.046358
																							0.083344	0.144936	0.188744
																							0.342183	0.074698	0.109746
																							0.853763	0.130442	0.249293
																							0.101639	0.064664	0.096974
																							0.245965	0.123753	0.044466
																							0.160589	0.084732	0.117787
																							0.271714	0.173923	0.133398
																							0.858507	0.075813	1.41487
																							0.115868	0.101455	0.389786
																							0.26697	0.090306	0.093189
																							0.639645	0.105915	0.047304
																							0.119256	0.144936	0.108327
																							0.200567	0.068008	0.570015
																							0.174141	0.063549	0.074741
																							0.13484	0.25308	0.068118
																							0.143649	0.132672	0.059603
																							0.445854	0.076927	0.086094
																							0.43298	0.070238	0.095554
																							0.181594	0.051285	0.218072
																							0.072502	0.10257	0.452701
																							0.092652	0.137132	0.247874
																							0.06341	0.044596	0.142859
																							0.075238	0.095881	0.978723
																							0.125178	0.042366	0.555824
																							0.054211	0.036791	0.192055
																							0.049283	0.036791	0.041628
																							0.036798	0.043481	0.278622
																							0.05224	0.215174	0.227533
																							0.098565	0.0524	0.200097
																							0.04304	0.079157	0.046831
																							0.158362	0.04794	0.272945
																							0.128792	0.138246	0.085147
																							0.071624	0.061319	0.047304
																							0.047311	0.0524	0.112584
																							0.04074	0.059089	0.151846
																							0.134049	0.367914	0.383637
																							0.112693	0.15051	0.103596
																							0.082795	0.131557	0.18969
																							0.068996	0.167234	0.44324
																							0.291097	0.040136	0.238413
																							0.277626	0.272033	0.08704
																							0.09758	0.171693	0.081836
																							0.044026	0.354535	0.050615
																							0.299639	0.043481	0.046358
																							0.039098	0.448186	0.073321
																							0.069653	0.208485	0.420061
																							0.745484	0.042366	0.114476
																							0.128464	0.078042	0.056292
																							0.150805	0.066893	0.045885
																							0.091994	0.296561	0.202935
																							0.263827	0.109259	0.084201
																							0.770125	0.096996	0.169822
																							0.092652	0.212944	0.056765
																							0.317709	0.042366	0.067172
																							0.171832	0.091421	0.056765
																							0.112365	0.037906	0.168436
																							0.136349	0.110374	0.218467
																							0.036798	0.111489	0.115626
																							0.246414	0.064664	0.1462
																							0.379149	0.083617	0.043916
																							0.387362	0.093651	0.064484
																							0.057497	0.163889	0.04336
																							0.285511	0.186187	0.401912
																							0.179061	0.089191	0.046139
																							0.210602	0.085847	0.150648
																							0.661703	0.212944	0.047251
																							0.398205	0.10703	0.207349
																							0.057825	0.118178	0.401912
																							0.461944	0.114834	0.121185
																							0.036798	0.137132	0.038913
																							0.13832	0.243046	0.054478
																							0.273683	0.122638	0.118962
																							0.223087	0.134902	0.206793
																							0.613077	0.060204	0.065596
																							0.041726	0.086962	0.181222
																							0.212244	0.132672	0.13675
																							1.74461	0.043481	0.037801
																							0.074253	0.075813	0.046139
																							0.277626	0.084732	0.045583
																							0.190633	0.041251	0.187892
																							0.09752	0.091421	0.117294
																							0.084848	0.04794	0.040024
																							0.123966	0.074698	0.130079
																							0.040771	0.286527	0.047251
																							0.067217	0.063549	0.043916
																							0.076584	0.060204	0.08394
																							0.061157	0.115949	0.107844
																							0.116253	0.041251	0.642614
																							0.073278	0.095881	0.649285
																							0.159228	0.070238	0.398021
																							0.078237	0.085847	0.045583
																							0.421485	0.25754	0.162877
																							0.278236	0.278723	0.165657
																							0.136087	0.073583	0.421368
																							0.067768	0.095881	0.225693
																							0.339943	0.091421	0.120629
																							0.09146	0.072468	0.050031
																							0.215426	0.043481	0.053366
																							0.100826	0.224093	0.193451
																							0.041322	0.069123	0.048919
																							0.167492	0.055745	0.678747
																							0.492559	0.068008	0.164545
																							0.377409	0.25308	0.075602
																							0.060055	0.195106	0.063928
																							0.305784	0.057974	0.24237
																							0.058402	0.125983	0.55923
																							0.251238	0.089191	0.320751
																							0.172451	0.402476	0.116738
																							0.209916	0.037906	0.063928
																							0.337739	0.068008	0.088387
																							0.157575	0.053515	0.291289
																							0.54435	0.049055	0.161765
																							0.180164	0.083617	0.678747
																							0.069972	0.057974	0.168992
																							0.161983	0.057974	0.042248
																							0.128374	0.072468	0.235699
																							0.071625	0.093651	0.360776
																							0.079889	0.216289	0.04058
																							0.038567	0.056859	0.037245
																							0.05179	0.111489	0.219578
																							0.253442	0.221863	0.072822
																							0.048485	0.074698	0.351325
																							0.042975	0.165004	0.051698
																							0.048485	0.229668	0.26405
																							0.106887	0.090306	0.138974
																							0.141046	0.040136	0.226249
																							0.125619	0.121523	0.426371
																							0.038016	0.046825	0.111179
																							0.344902	0.354535	0.048919
																							0.037465	0.10257	0.430263
																							0.179062	0.064664	0.164545
																							0.087603	0.046825	0.255712
																							0.142699	0.05463	0.045027
																							0.087603	0.043481	0.045583
																							0.141046	0.065779	0.23292
																							0.087603	0.060204	0.050586
																							0.042975	0.120408	0.075602
																							0.078787	0.042366	0.052254
																							0.077135	0.185072	0.047807
																							0.158126	0.110374	0.050586
																							0.072727	0.096996	0.200122
																							0.278236	0.076927	0.080605
																							0.060055	0.069123	0.042248
																							0.04573	0.078042	0.042248
																							0.045179	0.059089	0.208461
																							0.368593	0.046825	0.051142
																							0.105785	0.076927	0.076713
																							0.178511	0.05017	0.127856
																							0.252891	0.071353	0.1273
																							0.066115	0.20737	0.06504
																							0.260054	0.085847	0.072266
																							0.37245	0.059089	0.171771
																							0.126721	0.046825	0.057257
																							0.049587	0.081387	0.039469
																							1.38236	0.143821	0.07449
																							0.526719	0.185072	0.120073
																							0.041873	0.040136	0.070043
																							0.076033	0.061319	0.236255
																							0.18347	0.076927	0.041692
																							0.065013	0.055745	0.513091
																							0.063361	0.080272	0.134527
																							0.096969	0.037906	0.055589
																							0.150412	0.049055	0.042804
																							0.314599	0.570824	0.076158
																							0.401651	0.076927	0.076158
																							0.04573	0.284297	0.584801
																							0.036914	0.040136	0.429707
																							0.147658	0.036791	0.127856
																							0.037465	0.095881	0.198454
																							0.230853	0.040136	0.320751
																							0.165839	0.132672	0.103952
																							0.352615	0.214059	0.058925
																							0.060606	0.113719	0.544777
																							1.08099	0.040136	0.312413
																							0.083195	0.121523	1.06176
																							0.245178	0.078042	0.12452
																							0.753715	0.055745	0.093946
																							0.083746	0.066893	0.167324
																							0.132231	0.086962	0.07449
																							0.089807	0.051285	0.088387
																							0.138291	0.131557	0.11785
																							0.15658	0.078042	0.393573
																							0.159897	0.0524	0.088387
																							0.244822	0.498356	0.576463
																							0.136012	0.347846	0.753237
																							0.044453	0.049055	0.106176
																							0.050424	0.109259	0.211796
																							0.049097	0.099225	0.081717
																							0.128714	0.091421	0.198454
																							0.047107	0.090306	0.375785
																							0.051751	0.429233	0.122297
																							0.047107	0.075813	0.13675
																							0.055068	0.233012	0.172327
																							0.319131	0.090306	0.296848
																							0.07829	0.136017	0.197899
																							0.062367	0.053515	0.081161
																							0.228235	0.153855	0.398577
																							0.055732	0.239702	0.051698
																							0.237524	0.083617	0.051142
																							0.09554	0.369029	0.163433
																							0.185773	0.065779	0.125632
																							0.084925	0.099225	0.280171
																							0.322448	0.221863	0.042248
																							0.06104	0.078042	0.061148
																							0.043126	0.064664	0.196787
																							0.056395	0.039021	0.771026
																							0.039145	0.05017	0.256823
																							0.082934	0.148281	0.058369
																							0.168522	0.284297	0.235699
																							0.04777	0.10034	0.799377
																							0.421969	0.049055	0.205125
																							0.072319	0.069123	0.170104
																							0.176484	0.10257	0.044472
																							0.469076	0.178383	0.060037
																							0.404719	0.071353	0.07171
																							0.078953	0.158315	0.075046
																							0.090896	0.129327	0.060593
																							0.374199	0.062434	0.32909
																							0.041135	0.053515	0.064484
																							0.181792	0.057974	0.194563
																							0.127387	0.075813	0.056701
																							0.254111	0.173923	0.064484
																							0.039808	0.043481	0.304074
																							0.063694	0.037906	0.196787
																							0.318468	0.179497	0.098949
																							0.086915	0.105915	0.217355
																							0.463105	0.084732	0.11507
																							0.045116	0.231897	0.450831
																							0.101512	0.103685	0.557006
																							0.739773	0.423659	0.052254
																							0.113454	0.05017	0.072822
																							0.181792	0.040136	0.272944
																							0.251457	0.148281	0.163989
																							0.140656	0.113719	0.084913
																							0.048434	0.129327	0.116562
																							0.041135	0.051285	0.121966
																							0.039808	0.0524	0.258598
																							0.420643	0.046825	0.059439
																							0.157907	0.072468	0.076422
																							0.040472	0.040136	0.257826
																							0.119425	0.094766	0.040913
																							0.398748	0.177268	0.138176
																							0.09355	0.05463	0.07179
																							0.422633	0.178383	0.047088
																							0.165205	0.05463	0.052492
																							0.130704	0.326663	0.118106
																							0.091559	0.057974	0.038597
																							0.732475	0.062434	0.152071
																							0.242168	0.120408	0.080281
																							0.087579	0.182842	0.078737
																							0.098194	0.084732	0.440003
																							0.388132	0.090306	0.388284
																							0.152599	0.075813	0.044772
																							0.084925	0.222978	0.049404
[truncated: 7,013 more rows]
