# Supplementary material for: Capping protein regulates endosomal trafficking by controlling F-actin density around endocytic vesicles and recruiting RAB5 effectors
Source: eLife. 2021 Nov 19;10:e65910. doi: 10.7554/eLife.65910 (PMC8654373; doi:10.7554/eLife.65910)
Supplement: Figure 3—figure supplement 1—source data 2. [file elife-65910-fig3-figsupp1-data2.xlsx]

## Sheet: Sheet1
Figure S3A				Figure S3C			Figure S3D	Number		Size				Figure S3E						Figure S3F	Size					Number							Figure S3I
WT	CapZb KO	CapZb KO+CapZb rescue		Scramble-sg	CapZa1/2-sg		Scramble-sg	CapZa1/2-sg		Scramble-sg	CapZa1/2-sg			Latrunculin A	-	+	-	+		Latrunculin A	-	+	-	+		Latrunculin A	-	+	-	+
7.815	20.397	14.348		12.578	17		132	247		0.112987	0.140692			Capzb-sg	-	-	+	+		Capzb-sg	-	-	+	+		Capzb-sg	-	-	+	+
4.139	26.775	9.871		17.847	26.171		118	204		0.227923	0.081353				18.384	15.723	42.118	15.244			0.055976	0.043544	0.122142	0.151452			81	70	623	202			Mander‘s Coefficents（N-wash/Rab5）			Rab5/n-WASP pearson's colocalization
5.2	21.683	8.345		14.422	36.6		194	327		0.028247	0.439304				16.025	13.449	41.574	17.254			0.049853	0.041729	0.091606	0.080775			281	95	308	175			scramble-sg	Capzβ-sg
6.351	20.596	7.988		13.47	52.2		179	313		0.085714	0.073696				17.715	8.82	40.929	23.727			0.055976	0.146053	0.359097	0.065629			288	60	475	236			0.124	0.159		NC	capzb-ko
8.121	21.874	7.679		15.943	22.64		125	230		0.093507	0.065082				15.645	10.828	45.267	25.67			0.038483	0.39643	0.059849	0.117796			149	126	381	297			0.067	0.225		0.313	0.456
8.1	25.544	5.666		19.848	16.616		142	339		0.119805	0.048812				23.623	15.899	43.77	20.111			0.055101	0.06078	0.080614	0.079092			271	55	663	203			0.114	0.156		0.32	0.52
5.943	13.097	9.05		13.649	25		164	317		0.051623	0.107194				21.649	9.627	41.659	22.646			0.053352	0.066223	0.078171	0.114431			148	95	435	275			0.122	0.151		0.373	0.499
12.542	21.995	10.889		8.77	19.7		88	191		0.027273	0.037326				20.497	14.454	31.467	18.819			0.050728	0.041729	0.094049	0.114431			249	98	666	225			0.097	0.288		0.418	0.445
4.988	16.863	10.333		12.899	29		80	459		0.07013	0.114851				18.555	11.967	32.914	14.941			0.0586	0.365586	0.280926	0.089189			83	72	494	341			0.123	0.29		0.412	0.473
6.327	14.737	5.727		19.896	16		208	283		0.031169	0.053597				18.861	12.908	33.289	16.076			0.064722	0.100695	0.062292	0.077409			137	87	589	288			0.151	0.193		0.407	0.49
7.348	16.131	10.336		16.246	21.2		66	292		0.056494	0.092838				20.102	9.777	31.585	19.271			0.039358	0.276684	0.145349	0.055533			232	68	546	238			0.139	0.18		0.42	0.449
6.744	16.06	6.769		13.476	23		158	272		0.114935	0.190461				16.945	10.469	34.125	19.437			0.093584	0.047172	0.045192	0.060581			240	78	623	333			0.177	0.237		0.389	0.441
6.396	14.09	11.341		11.626	29		193	201		0.296104	0.042112				22.07	12.643	27.793	17.92			0.038483	0.391894	0.056185	0.072361			177	79	588	298			0.11	0.224		0.33	0.55
7.742	15.81	5.792		12.405	28.2		168	416		0.192858	0.041155				21.32	11.416	26.469	18.276			0.065597	0.056244	0.046414	0.038704			290	83	675	218						0.354	0.484
9.537	22.263	9.68		16.618	32.41		100	374		0.118831	0.12155				19.398	11.933	23.975	18.767			0.086587	0.072573	0.149013	0.092554			226	135	580	224
11.757	22.673	10.457		13.307	16.5		202	379		0.046753	0.088052				19.311	9.147	25.03	22.318			0.044606	0.046265	0.069621	0.365168			124	108	376	314
6.451	18.929	10		14.04	26.1		128	353		0.098377	0.148349				21.243	9.704	31.32	23.131			0.199414	0.505289	0.045192	0.047118			144	138	636	252
7.432	14.678	11.603			32.328		108	240		0.144156	0.156005				21.655	10.663	38.301	21.955			0.48454	0.494403	0.290698	0.063947			134	73	486	426
8.9	19.969	7.669					159	454		0.071104	0.209602				18.082	9.765	37.059	16.515			0.057725	0.045358	0.058628	0.050484			241	112	469	295
9.988	22.018	8.509					118	242		0.401299	0.060297					16.604	31.204	14.462			0.181047	0.107952	0.158784	0.104334			166	63	579	370
13.993	27.041	7.837					141	281		0.13052	0.026798					16.682	37.99	21.589			0.087462	0.28122	0.103821	0.173329			175	115	428	255
13.872		11.854					128	254		0.248377	0.048812					15.03	39.84	19.982			0.063847	0.573326	0.185656	0.102651				103	479	307
19.628		7.649					85	420		0.116883	0.289041					9.87	35.569	18.023			0.055976	0.048987	0.258941	0.146404				86	568
		16.175					108	275		0.083766	0.056468					11.999	22.097	19.655			0.067346	0.336557	0.058628	0.074043				98
							163	366		0.052597	0.320625										0.1723	0.160568	0.131913	0.099285				116
							91			0.302923	0.102408										0.049853	0.160568	0.089164	0.058898				69
							167			0.131494	0.041155										0.05685	0.089809	0.164891	0.099285				63
										0.094481	0.251714										0.052477	0.614149	0.04275	0.094237				76
										0.178247	0.033498										0.090086	0.051708	0.048857	0.289442
										0.067208	0.026798										0.039358	0.434531	0.0513	0.154818
										0.187987	0.103366										0.114575	0.14696	0.400625	0.065629
										0.198702	0.106237										0.10408	0.169639	0.19787	0.12621
										0.07987	0.130164										0.511653	0.322043	0.15512	0.063947
										0.085714	0.096666										0.699697	0.617777	0.047635	0.040387
										0.085714	0.242143										0.288625	0.164196	0.178327	0.05385
										0.052597	0.037326										0.069095	0.14061	0.064735	0.228861
										0.242533	0.07561										0.094459	0.223162	0.157563	0.082457
										0.027273	0.158877										1.61892	0.052615	0.130692	0.297856
										0.049675	0.170362										0.042856	0.177804	0.048857	0.05385
										0.139286	0.111022										0.246643	0.062594	0.050078	0.122845
										0.225	0.182804										0.039358	0.26852	0.037864	0.037022
										0.119805	0.036369										0.234398	0.518897	0.081835	0.074043
										0.199676	0.187589										0.065597	1.74992	0.058628	0.079092
										0.383767	0.038284										1.06879	0.975199	0.089164	0.336561
										0.083766	0.028713										0.091835	0.050801	0.045192	0.19184
										0.075974	0.043069										0.069095	0.07348	0.039085	0.111065
										0.158767	0.036369										0.039358	0.904441	0.079392	0.16828
										0.397403	0.125379										0.774039	0.045358	0.255276	0.156501
										0.044805	0.054554										0.08134	0.322043	0.069621	0.058898
										0.306819	0.044983										0.073468	0.771995	0.188098	0.058898
										0.06039	0.051683										0.272007	0.045358	0.11237	0.05385
										0.232793	0.100494										0.627978	0.117024	0.250391	0.043753
										0.087662	0.040198										0.488038	0.491682	0.177106	0.070678
										0.202598	0.044983										0.072594	0.279406	0.057407	0.107699
										0.198702	0.146435										0.076092	0.048987	0.054964	0.291125
										0.192858	0.994415										0.071719	0.193226	0.133135	0.376948
										0.15487	0.133992										0.150435	0.22044	0.080614	0.252421
										0.279546	0.228744										0.316613	0.318414	0.075728	0.112748
										0.136364	0.171319										0.238772	0.172361	0.14657	0.183426
										0.201624	0.185675										0.942841	0.051708	0.065957	0.048801
										0.227923	0.127293										0.038483	1.17931	0.12947	0.117796
										0.170455	0.086138										0.114575	0.085273	0.057407	0.04207
										0.042857	0.064125										0.104955	0.048987	0.117256	0.114431
										0.118831	0.092838										0.04723	0.046265	0.273598	0.117796
										0.116883	0.187589										0.044606	0.069851	0.089164	0.100968
										0.137338	0.178976										0.073468	0.06078	0.040307	0.04207
										0.037987	0.178018										0.04548	0.090716	0.38719	0.407238
										0.349676	0.129207										0.06822	0.059873	0.334669	0.16828
										0.051623	0.446003										0.041107	0.048987	0.127028	0.331512
										0.085714	0.037326										0.037609	0.044451	0.0513	0.178377
										0.037987	0.047854										0.060349	0.04808	0.170999	0.292808
										0.029221	0.089009										0.037609	0.090518	0.14657	0.107699
										0.047727	0.030627										0.049853	0.080358	0.229627	0.089189
										0.089611	0.087095										0.050728	0.163487	0.196648	0.040387
										0.50065	0.617322										0.048104	0.100678	0.046414	0.302905
										0.149026	0.089009										0.037609	0.094213	0.178327	0.129576
										0.136364	0.493858										0.046355	0.046183	0.158784	0.045436
										0.093507	0.206731										0.046355	0.038794	0.232069	0.057215
										0.056494	0.069867										0.065597	0.038794	0.105042	0.074043
										0.14513	0.07561										0.07959	0.067427	0.050078	0.107699
										0.149026	0.149306										0.04548	0.173647	0.243062	0.19184
										0.142208	0.101451										0.057725	0.036946	0.213748	0.040387
										0.117857	0.122507										0.048031	0.03787	0.12947	0.067312
										0.061364	0.034455										0.04215	0.107144	0.074506	0.117796
										0.027273	0.06891										0.037249	0.374081	0.100156	0.476233
										0.029221	0.032541										0.048031	0.072045	0.100156	0.075726
										0.749027	0.043069										0.12547	0.346371	0.109928	0.082457
										0.07987	0.108151										0.061755	0.036946	0.0513	0.037022
										0.36039	0.184718										0.062735	0.35376	0.078171	0.05385
										0.759742	0.04594										0.058814	0.071121	0.095271	0.063947
										0.064286	0.114851										0.076458	0.536644	0.065957	0.107699
										0.228897	0.034455										0.08234	1.2848	0.04275	0.144721
										0.104221	0.107194										0.326418	0.061885	0.200313	0.445943
										0.086688	0.055511										0.04215	0.059114	0.086721	0.043753
										0.156818	0.109108										0.08234	0.138548	0.063514	0.060581
										0.043831	0.059339										0.066656	0.187502	0.213748	0.089189
										0.663313	0.061254										0.057834	1.4409	0.072064	0.074043
										0.032143	0.033498										0.118608	0.502469	0.084278	0.058898
										0.099351	0.069867										0.060774	0.039717	0.056185	0.043753
										0.14026	0.175147										0.061755	0.050801	0.149013	0.052167
										0.035065	0.04594										0.065676	0.126541	0.116035	0.129576
										0.061364	0.048812										0.074498	0.052648	0.166113	0.048801
										0.226948	0.145477										0.04117	0.039717	0.236955	0.121162
										0.049675	0.107194										0.054893	0.9449	0.041528	0.370217
										0.196754	0.092838										0.065676	0.073892	0.168556	0.228861
										0.183117	0.061254										0.049992	0.044335	0.037864	0.047118
										0.066234	0.312011										0.048031	1.74109	0.407954	0.36012
										0.197728	0.036369										0.04313	0.337134	0.079392	0.201936
										0.050649	0.048812										0.050972	0.153327	0.052521	0.102651
										0.037013	0.438346										0.130371	0.246616	0.107485	0.134624
										0.069156	0.085181										0.132331	0.3436	0.142906	0.163232
										0.221104	0.036369										0.049012	0.057267	0.079392	0.331512
										0.137338	0.02967										0.366607	0.231838	0.083056	0.159866
										0.036039	0.043069										0.046071	0.301112	0.128249	0.173329
										0.044805	0.111022										0.132331	0.348218	0.068399	0.136307
										0.112013	0.02967										0.052933	0.718604	0.095271	0.055533
										0.094481	0.063168										0.290149	0.071121	0.080614	0.045436
										0.090585	0.110065										0.037249	0.077587	0.054964	0.112748
										0.087662	0.247886										0.04411	1.54343	0.086721	0.09592
										0.137338	0.037326										0.081359	0.845145	0.079392	0.301222
										0.029221	0.257457										0.113707	0.053572	0.084278	0.068995
										0.057468	0.05264										0.88417	0.081282	0.048857	0.087506
										0.081818	0.148349										0.107826	0.173647	0.045192	0.063947
										0.06039	0.12155										0.107826	0.167182	0.054964	0.067312
										0.076948	0.092838										0.101944	0.0859	0.117256	0.048801
										0.144156	0.192375										0.643033	1.8196	0.181991	0.297856
										0.050649	0.047854										0.079399	0.236456	0.054964	0.102651
										0.027273	0.136864										0.363666	0.253082	0.222298	0.058898
										0.049675	0.111979										0.102924	0.077587	0.153899	0.055533
										0.068182	0.028713										0.657736	0.063732	0.056185	0.074043
										0.13052	0.12155										0.058814	0.367615	0.150234	0.543545
										0.115909	0.07561										0.04411	0.739848	0.075728	0.09592
										0.047472	0.051683										0.12645	0.245692	0.054964	0.099285
										0.052417	0.133992										0.135272	0.068351	0.205198	0.19184
										0.032637	0.064125										0.0843	0.049877	0.097713	0.116113
										0.035604	0.313925										0.134292	0.045259	0.0513	0.082457
										0.277908	0.055511										0.230355	0.064656	0.075728	0.038704
										0.15824	0.354123										0.142134	0.653948	0.213748	0.072361
										0.112746	0.066039										0.051952	0.135777	0.037864	0.047118
										0.157251	0.043069										0.129391	0.080358	0.236955	0.038704
										0.091977	0.126336										0.192126	0.040641	0.241841	0.358437
										0.03956	0.40772										0.173501	0.036946	0.041528	0.34834
										0.055384	0.080395										0.088221	0.039717	0.144127	0.164915
										0.027692	0.048812										0.33818	0.202281	0.109928	0.057215
										0.060329	0.192375										0.081359	0.119152	0.212527	0.148087
										0.152306	0.02967										0.079399	0.053572	0.362761	0.22213
										0.043516	0.084224										0.037249	0.055419	0.061071	0.077409
										0.088021	0.253628										0.087241	0.079434	0.18077	0.144721
										0.100878	0.030627										0.196047	0.03787	0.086721	0.057215
										0.060329	0.083267										0.058814	0.059114	0.105042	0.212033
										0.040549	0.15122										0.057834	0.038794	0.222298	0.370217
										0.03956	0.031584										0.190165	0.070198	0.186877	0.043753
										0.243293	0.235444										0.049992	0.141319	0.074506	0.151452
										0.143405	0.576167										0.037249	0.045259	0.174663	0.038704
										0.068241	0.089009										0.051952	0.045259	0.039085	0.171646
										0.066263	0.408677										0.037249	0.04803	0.076949	0.223813
										0.038571	0.066039										0.108806	0.053572	0.037864	0.393776
										0.103845	0.113894										0.063715	0.23738	0.037864	0.079092
										0.042527	0.08231										0.051952	0.543109	0.076949	0.082457
										0.076153	0.138778										0.384251	0.067427	0.100156	0.048801
										0.027692	0.136864										0.099984	0.18196	0.229627	0.166598
										0.095933	0.402934										0.04313	0.806351	0.043971	0.040387
										0.359006	0.205774										0.109786	0.061885	0.053742	0.067312
										0.094944	0.064125										0.129391	0.070198	0.079392	0.085823
										0.028681	0.102408										0.303872	0.078511	0.062292	0.040387
										0.050439	0.606794										0.067636	0.047106	0.213748	0.190157
										0.040549	0.042112										0.177422	0.169521	0.175884	0.986123
										0.037582	0.043069										0.04411	0.116262	0.13802	0.188474
										0.037582	0.036369										0.121549	0.058456	0.127028	0.082457
										0.113735	0.451746										0.286228	0.090281	0.207641	0.331512
										0.07912	0.343595										0.091162	0.133798	0.074506	0.361803
										0.223514	0.072739										0.803791	0.046115	0.103821	0.477916
										0.047472	0.126336										0.186244	0.058456	0.101378	0.063947
										0.13846	0.073696										0.12547	0.151335	0.061071	0.23391
										0.058351	0.145477										0.098023	0.03962	0.04275	0.048801
										0.104834	0.363694										0.441105	0.054559	0.053742	0.228861
										0.195822	0.084224										0.146055	0.068848	0.058628	0.200254
										0.15824	0.113894										0.254861	0.21044	0.16367	0.040387
										0.302633	0.188546										0.243098	0.085735	0.052521	0.090871
										0.314501	0.071782										0.090181	0.042218	0.065957	0.072361
										0.02967	0.110065										0.053913	0.11821	0.235734	0.341609
										0.265051	0.026798										0.069597	0.089632	0.04275	0.131259
										0.170108	0.077524										0.051952	0.201347	0.065957	0.208668
										0.201756	0.123464										0.059794	0.040269	0.046414	0.286077
										0.02967	0.032541										0.698906	0.581308	0.078171	0.206985
										0.081098	0.421119										0.089201	0.075992	0.039085	0.190157
										0.141427	0.257457										0.12547	0.961919	0.052521	0.089189
										0.751638	0.230658										0.319556	0.253957	0.046414	0.281028
										0.161207	0.122507										0.483255	0.363074	0.057407	0.052167
										0.165163	0.199074										0.159778	0.067549	0.179548	0.052167
										0.725924	0.141649										0.04019	0.074693	0.11237	0.121162
										0.150328	0.057425										0.414638	0.055208	0.254055	0.339926
										0.067252	0.250757										0.188205	0.917753	0.090385	0.075726
										0.328347	0.245015										0.079399	0.200698	0.046414	0.045436
										0.071208	0.250757										0.134292	0.051961	0.052521	0.121162
										0.198789	0.026798										0.174481	0.499471	0.037864	0.114431
										0.709111	0.193332										0.052933	0.051961	0.20642	0.365168
										0.129559	0.200032										0.424441	1.18535	0.068399	0.114431
										0.056373	0.206731										0.068616	0.38191	0.142906	0.040387
										0.151317	0.053597										0.123509	0.087034	0.190541	0.30627
										0.116702	0.115808										0.097043	0.0656	0.203977	0.139673
										0.219558	0.033498										0.188205	1.89396	0.659566	0.132941
										0.075164	0.127293										0.439144	0.64431	0.260162	0.065629
										0.052417	0.047854										0.122529	0.064951	0.221077	0.077587
										0.094944	0.056468										0.066656	0.10522	0.107485	0.052648
										0.044505	0.089966										0.039209	0.613784	0.279705	0.080358
										0.095933	0.035412										0.052933	0.18381	0.107485	0.07574
										0.094944	0.194289										0.121549	0.038321	0.381082	0.193044
										0.036593	0.047854										0.060774	0.114963	0.090385	0.04803
										0.172086	0.033498										0.062735	0.038321	0.201534	0.053572
										0.045494	0.033498										0.178402	0.402045	0.140463	0.157021
										0.159229	0.097623										0.071557	0.14549	0.095271	0.043412
										0.046483	0.077524										0.21075	0.409839	0.096492	0.038794
										0.094944	0.155048										0.050972	0.237719	0.116035	0.060038
										0.290765	0.050726										0.189185	0.059105	0.090385	0.110839
										0.095933	0.031584										0.058814	0.146139	0.12947	0.060038
										0.095933	0.026798										0.130371	0.3293	0.041528	0.038794
										0.124614	0.042112										0.245058	0.042218	0.233291	0.205975
										0.028681	0.218216										0.104885	0.14419	0.142906	0.062809
										0.055384	0.100494										0.141154	0.050662	0.222298	0.063732
										0.112746	0.04594										0.196047	0.122757	0.43971	0.064656
										0.044505	0.086138										0.069597	0.045465	0.080614	0.060961
										0.209668	0.026798										0.094102	0.086384	0.178327	0.054496
										0.081098	0.063168										0.176442	0.066899	0.109928	0.072045
										0.04945	0.037326										0.434243	0.054559	0.162449	0.080358
										0.068241	0.066039										0.384251	0.061703	0.107485	0.056343
										0.17802	0.102408										1.21843	0.069582	0.149013	0.060961
										0.068241	0.181847										0.092142	0.042313	0.04275	0.07574
										0.115713	0.087095										0.068616	0.06394	0.576509	0.051725
										0.086043	0.132078										0.072537	0.038552	0.074506	0.120999
										0.050439	0.095709										0.354844	0.160791	0.313904	0.077587
										0.166152	0.088052										0.04117	0.143866	0.056185	0.055419
										0.036593	0.156963										0.299951	0.064881	0.224741	0.074816
										0.100878	0.039241										0.105865	0.201224	0.183213	0.072969
										0.110768	0.200032										0.045091	0.457925	0.329783	0.038794
										0.032637	0.058382										0.08528	0.045134	0.065957	0.19951
										0.04945	0.143563										0.995916	0.061119	0.052521	0.127465
										0.314501	0.07561										0.491097	0.037612	0.050078	0.071121
										0.131537	0.088052										0.059794	0.358253	0.040307	0.053572
										0.154284	0.140692										0.061755	0.084627	0.101378	0.37131
										0.038571	0.087095										0.231335	0.209686	0.134356	0.729688
										0.073186	0.103366										0.229374	0.128821	0.31024	0.304806
										0.060329	0.032541										0.087241	0.067701	0.569181	0.083129
										0.112746	0.05264										0.04411	0.039493	0.041528	0.769405
										0.028681	0.154091										0.08332	0.053597	0.039085	0.115457
										0.055384	0.160791										1.12237	0.043254	0.191763	0.187502
										0.100878	0.094752										0.700866	0.044194	0.080614	0.167182
										0.074175	0.135923										0.246038	0.949701	0.257719	0.256776
										0.038571	0.075296										0.148995	0.679835	0.337111	0.047106
										0.031648	0.040092										0.099984	0.084627	0.046414	0.071121
										0.041928	0.113432										0.245058	0.037612	0.0513	0.046183
										0.095423	0.470353										0.04117	1.10579	0.151456	0.038794
										0.098315	0.083119										0.076458	0.040433	0.081835	0.110839
										0.075182	0.106587										0.150956	0.151388	0.053742	0.081282
										0.039037	0.164281										0.04019	0.263283	0.478796	0.076663
										0.078073	0.1193										0.038229	0.272686	0.326119	0.072045
										0.219762	0.165259										0.155857	0.407149	0.205198	0.076663
										0.078073	0.154503										0.113707	0.247298	0.442153	0.155174
										0.04482	0.077251										0.047051	0.038552	0.484903	0.822053
										0.080965	0.154503										0.04313	0.178657	0.664451	0.038794
										0.046266	0.057694										0.277406	0.225671	0.054964	0.052648
										0.14458	0.092897										0.164679	0.047015	0.151456	0.084053
										0.148918	0.02738										0.097043	0.077104	0.13802	0.278944
										0.063615	0.046938										0.353864	0.050776	0.083056	0.036946
										0.09976	0.040092										0.080379	0.513403	0.128249	0.131159
										0.174942	0.14179										0.060774	1.54961	0.072064	0.052648
										0.095423	0.1193										0.058814	0.113776	0.087942	0.167182
										0.056386	0.13299										0.310734	0.039493	0.339554	0.05819
										0.031808	0.106587										0.099004	0.274567	0.073285	0.077587
										0.056386	0.116366										0.322497	0.927133	0.22352	0.481225
										0.11711	0.070406										0.060774	0.314059	0.522767	0.044335
										0.13446	0.078229										0.156837	0.667611	0.057407	0.046183
										0.070844	0.1281										0.071557	0.067701	0.123363	0.044335
										0.028916	0.088008										0.067636	0.056418	0.420168	0.083129
										0.033253	0.047915										0.04313	0.169254	0.13802	0.056343
										0.02747	0.033247										0.407777	0.079925	0.096492	0.03787
										0.041928	0.258156										0.099984	0.053597	0.101378	0.071121
										0.174942	0.076273										0.119588	0.579223	0.064735	0.068351
										0.078073	0.063561										0.04411	0.066761	0.098935	0.066503
										0.313739	0.262068										0.072537	0.681716	0.062292	0.060038
										0.066507	0.251311										0.055873	0.048895	0.062292	0.061885
										0.059278	0.085074										0.038229	0.109075	0.497117	0.105297
										0.039037	0.125167										0.038229	0.046075	0.076949	0.386088
										0.121447	0.080185										0.049992	0.047955	0.158784	0.041565
										0.080965	0.039115										0.117628	0.054537	0.100156	0.306654
										0.190846	0.121255										0.057834	0.053597	0.062292	1.01694
										0.135905	0.117344										0.75968	1.24683	0.0513	0.03787
										0.153255	0.068451										0.048031	0.055478	0.072064	0.048954
										0.371571	0.111477										0.104885	0.058298	0.061071	0.415645
										0.105544	0.220998										0.628329	0.236955	0.128249	0.173647
										0.114218	0.186772										0.047051	0.069582	0.041528	0.136701
										0.028916	0.049871										0.051952	0.057358	0.056185	0.089595
										0.135905	0.040092										0.073517	0.140104	0.108706	0.130235
										0.02747	0.21513										0.416599	0.044194	0.135577	0.06558
										0.050603	0.179927										0.331319	0.047015	0.405511	0.061885
										0.975916	0.440039										1.30861	0.40997	0.14657	0.082205
										0.452536	0.537826										0.264663	0.424074	0.102599	0.093289
										0.040482	0.165259										0.142134	0.369537	0.040307	0.062809
										0.241449	0.052805										0.092142	0.041373	0.194205	0.125617
										0.033253	0.030314										0.194086	0.067701	0.048857	0.256776
										0.332534	0.036181										0.289169	0.051716	0.149013	0.073892
										0.063615	0.182861										0.262702	0.414671	0.043971	0.056343
										0.07229	0.109521										0.047051	0.039493	0.453146	0.089595
										0.156147	0.184817										0.051952	0.042313	0.570402	0.084976
										0.060724	0.277714										0.292109	0.085567	0.291919	0.042488
										0.078073	0.1193										1.08512	0.226612	0.37009	0.125617
										0.09976	0.055738										0.288188	0.072403	0.089164	0.317738
										0.589887	0.333452										0.037249	0.618716	0.371311	0.153327
										0.266028	0.048893										0.071557	0.052657	0.091606	0.06558
										0.244341	0.556405										0.055873	0.605552	0.063514	0.043412
										0.200966	0.162326										0.048031	1.0268	0.243062	0.060038
										0.177834	0.02738										0.081359	0.061119	0.131913	0.090518
										0.065061	0.203396										0.051952	0.118478	0.149013	0.242921
										0.143134	0.156458										0.091162	0.072403	0.144127	0.263242
										0.426512	0.088008										0.076458	0.37988	0.102599	0.074816
										0.138797	0.331496										0.04411	0.042313	0.119699	0.855305
										0.114218	0.164281										0.056853	0.144806	0.168556	0.270631
										0.043374	0.085074										0.051952	0.971327	0.101378	0.252158
										0.280486	0.282603										0.145074	0.261403	0.084278	0.287257
										0.04482	0.058672										0.063715	0.520925	0.109928	0.169953
										0.052049	0.731443										0.393073	0.040433	0.279705	0.047106
										0.242895	0.136901										0.399935	0.516223	0.085499	0.226296
										0.589887	0.081163										0.768502	0.115657	0.061071	0.060961
										0.381692	0.036181										0.456788	0.177716	0.046414	0.18196
										0.296389	0.144724										0.073517	1.04091	0.083056	0.036946
										0.112773	0.042048										0.045091	0.434418	0.097713	0.03787
										0.399041	0.084096										0.066656	0.866954	0.048857	0.291875
										0.555188	0.377456										0.038229	0.325343	0.0513	0.093289
										0.167713	0.122233										0.088221	0.814298	0.074506	0.397172
										0.456873	0.188728										1.60268	0.054537	0.106263	0.526484
										0.143134	0.164281										0.056853	0.590507	0.064735	0.039717
										0.7576	0.070406										0.236236	0.101552	0.053742	0.369462
										0.294944	0.204374										0.276426	0.050776	0.087942	0.046183
										0.58555	0.044004										0.037249	0.093089	0.053742	0.516323
										0.498802	0.451774										0.063715	0.099672	0.04275	0.097907
										0.125785	0.053783										0.131351	0.085567	0.070842	0.072969
										0.148918	0.257179										0.057834	0.456044	0.183213	0.145014
										0.131568	0.098764										0.038229	0.12694	0.122142	0.389783
										0.034699	0.097786										0.58814	0.09497	0.260162	0.047106
										0.157592	0.195573										0.278386	0.078045	0.103821	0.06558
										0.031808	0.962219										0.039209	0.413731	0.355433	0.042488
										0.21687	0.29336										0.046071	0.496477	0.18077	0.131159
										0.075182	0.047915										0.070577	0.082746	0.119699	0.443355
										0.241449	0.328563										0.051952	0.205925	0.053742	0.175495
										0.636153	0.044982										0.454828	0.118478	0.229627	0.040641
										0.36145	0.042048										0.050972	0.109075	0.059849	0.083129
										0.095423	0.20633										0.054893	0.038552	0.098935	0.242921
										0.046266	0.175038										0.068616	0.048895	0.18932	0.062809
										0.45109	0.149613										0.063715	0.039493	0.091606	0.149632
										0.062169	0.069428										0.075478	0.055478	0.064735	0.039717
										0.277594	0.081163										0.97043	0.056418	0.190541	0.055419
										0.070844	0.056716										0.074498	0.039493	0.128249	0.273402
										0.221208	0.692328										0.652835	0.07987	0.181991	0.222601
										0.273257	0.164281										0.225454	0.054546	0.108706	0.598529
										0.080965	0.453729										0.101944	0.148052	0.092828	0.379622
										0.277594	0.031292										0.04411	0.163637	0.205198	0.114533
										0.287715	0.067473										0.039209	0.118831	0.091606	0.088671
										0.600008	0.198507										0.049012	0.051623	0.196648	0.045259
										0.274702	0.055738										0.065676	0.127598	0.116035	0.234609
										0.150363	0.328563										0.038229	0.046753	0.233291	0.050801
										0.05494	0.343231										0.12449	0.064286	0.250391	0.040641
										0.057832	0.131034										0.08332	0.187013	0.068399	0.077587
										0.082411	0.037159										0.068616	0.073052	0.152677	0.124694
										0.666515	0.03227										0.061667	0.077922	0.043971	0.036946
										0.033253	0.02738										0.097639	0.102273	0.052521	0.062809
										0.02747	0.074318										0.07323	0.058442	0.037864	0.082205
										0.367234	0.040092										0.147744	1.47663	0.057407	0.072969
										0.3788	0.03227										0.037257	0.898053	0.053742	0.057267
										0.118556	0.091919										0.04882	0.412014	0.245505	0.104373
										0.033253	0.044004										0.051389	0.098377	0.045192	0.045259
										0.186508	0.199484										0.101494	0.059416	0.056185	0.073892
										0.594225	0.518268										0.272363	0.062338	0.056185	0.056343
										0.386029	0.084096										0.047535	0.037987	0.045192	0.16164
										0.076627	0.124189										0.07323	0.061364	0.067178	0.044335
										0.229883	0.05476										0.097639	0.12565	0.32734	0.104373
										0.050603	0.139835										0.044966	0.593183	0.078171	0.051725
										0.041928	0.280647										0.038542	0.075	0.290698	0.084976
										0.516151	0.052805										0.096355	0.058442	0.175884	0.118228
										0.075182	0.11441										0.128473	0.05552	0.192984	0.116391
										0.031808	0.04596										0.065521	0.148052	0.103821	0.177732
										0.221208	0.051827										0.083507	0.609741	0.184434	0.132119
										0.056386	0.194595										0.056528	0.268832	0.050078	0.048758
										0.290606	0.185794										0.050104	0.970132	0.084278	0.072351
										0.579766	0.455685										0.037257	0.071104	0.280926	0.048758
										0.076627	0.029336										0.057813	0.081818	0.166113	0.062914
										0.04482	0.042048										0.074514	0.613637	0.076949	0.100662
										0.030362	0.127122										0.059098	0.062338	0.11237	0.039321
										0.1894	0.154503										0.052674	0.118831	0.04275	0.039321
										0.125785	0.080185										0.330176	1.15033	0.096492	0.042467
										0.07229	0.212197										0.041111	0.186039	0.117256	0.17144
										0.030362	0.077251										0.145175	0.548378	0.227184	0.097516
										0.461211	0.106587										0.151598	0.062338	0.287033	0.059768
										0.09976	0.272824										0.213265	0.098377	0.19787	0.051904
										0.09976	0.04596										0.167015	0.137338	0.133135	0.070778
										0.257353	0.155481										0.101494	0.342858	0.304133	0.056622
										0.183617	0.30216										0.053959	0.039935	0.118478	0.272102
										0.150363	0.102676										0.041111	0.13052	0.047635	0.451407
										0.037591	0.02738										0.042396	0.922404	0.086721	0.218626
										0.049157	0.088986										0.38285	1.05779	0.037864	0.045613
										0.17205	0.299227										0.21455	0.335066	0.158784	0.231208
										0.037591	0.02738										0.065521	0.5513	0.043971	0.195033
										0.102652	0.209263										0.037257	0.287338	0.062292	0.3649
										0.198075	0.14668										0.037257	0.401299	0.092828	0.048758
										0.033253	0.04107										0.074514	0.037987	0.047635	0.062914
										0.185063	0.051827										0.061667	0.059416	0.415282	0.064487
										0.159038	0.062583										0.375141	0.093507	0.087942	0.037748
										0.153255	0.222953										0.066806	0.041883	0.168556	0.114818
										0.036145	0.198507										0.093785	0.077032	0.0513	0.039321
										0.121447	0.030314										0.537017	0.038002	0.040307	0.138411
										0.166267	0.306072										0.301912	0.078059	0.073285	0.501738
										0.033253	0.097786										0.052674	0.202338	0.19787	1.07268
										0.200966	0.116366										0.055243	0.102709	0.050078	0.196606
										0.049157	0.387235										0.04625	0.05649	0.111149	0.102235
										0.067953	0.029336										0.45351	0.071897	0.183213	0.218626
										0.28916	0.089964										0.299342	0.046219	0.04275	0.393212
										0.270365	0.085074										0.209411	0.068815	0.106263	0.039321
										0.154701	0.266957										0.134897	0.377971	0.208863	0.048758
										0.082411	0.236643										0.137466	0.067788	0.279705	0.04404
										0.112773	0.154503										0.044966	0.229042	0.183213	0.051904
										0.514705	0.037159										0.064236	0.064707	0.050078	0.075497
										0.093977	0.084096										0.055243	0.275261	0.070842	0.174586
										0.073736	0.088986										0.043681	0.988065	0.079392	0.158858
										0.07229	0.305094										0.038542	0.141739	0.059849	0.102235
										0.030362	0.196551										0.042396	0.069842	0.28459	0.262665
										0.21687	0.118322										0.118195	0.12736	0.177106	0.037748
										0.02747	0.216108										2.15835	0.12736	0.776822	0.451407
										0.02747	0.113432										0.068091	0.047246	0.184434	0.083361
										0.118556	0.092897										0.04882	0.314291	0.0513	0.050331
										0.105544	0.033247										0.07066	0.119143	0.072064	0.042467
										0.104098	0.116366										0.11948	0.260882	0.174663	0.040894
										0.225545	0.134945										0.074514	0.156118	0.114813	0.064487
										0.063615	0.031292										0.751567	0.082168	0.196648	0.083361
										0.182171	0.161348										0.055243	0.135576	0.041528	0.146275
										0.140243	0.154503										0.182432	0.065734	0.047635	0.188742
										0.041928	0.044982										0.534448	0.100655	0.040307	0.077069
										0.036145	0.033247										0.043681	0.046219	0.075728	0.268957
										0.039037	0.085074										0.110487	0.03903	0.039085	0.080215
										0.075182	0.077251										0.074514	0.180769	0.098935	0.21548
										0.062169	0.043026										0.110487	0.051355	0.062292	0.058195
										0.121447	0.093875										0.038542	0.24753	0.043971	0.086507
										0.09976	0.125167										0.131042	0.077032	0.086721	0.108526
										0.238557	0.230776										0.740004	0.072924	0.117256	0.28154
										0.030362	0.11441										0.044966	0.419055	0.136799	0.067632
										0.09976	0.487955										0.04882	0.059571	0.188098	0.051904
										0.050504	0.117344										0.391843	0.711776	0.202755	0.080215
										0.068958	0.072362										0.050104	0.108872	0.056185	0.091225
										0.033022	0.030314										0.54858	0.175633	0.18932	0.084934
										0.117519	0.037159										0.150313	0.057517	0.041528	0.147848
										0.032051	0.096809										0.098924	0.052382	0.152677	0.05505
										0.03108	0.1281										0.07066	0.193094	0.098935	0.136838
										0.027195	0.149613										0.23639	0.161254	0.090385	0.111672
										0.060217	0.081763										0.220974	0.133522	0.175884	0.067632
										0.042734	0.255352										0.35844	0.683018	0.039085	0.113245
										0.075756	0.075474										0.039827	0.05649	0.091606	0.048758
										0.056332	0.094342										0.089931	0.686099	0.304133	0.185596
										0.187448	0.109437										0.215835	1.39274	0.273598	0.047185
										0.093239	0.11321										0.21455	0.069842	0.057407	0.051904
										0.067015	0.212584										0.173439	0.118116	0.040307	0.05505
										0.058274	0.062895										0.218404	0.445759	0.097713	0.037748
										0.197161	0.062895										0.750282	0.156118	0.054964	0.095944
										0.062159	0.267931										0.280071	0.062653	0.221077	0.062914
										0.033022	0.129563										0.057813	0.038002	0.098935	0.092798
										0.027195	0.173589										0.043681	0.082168	0.067178	0.089652
										0.039821	0.244031										0.059098	0.080113	0.103821	0.743956
										0.029137	0.216358										0.096355	0.107845	0.552081	0.050331
										0.197161	0.152205										0.399551	1.22943	0.072064	0.121109
										0.122376	0.140884										0.037257	0.310183	0.081835	0.169867
										0.185506	0.222647										0.04625	0.128387	0.175884	0.217053
										0.44094	0.128305										0.540871	0.361537	0.081835	0.228063
										0.093239	0.067926										0.137466	0.251638	0.073285	0.06606
										0.093239	0.0478										0.037257	0.256774	0.217412	0.097516
										0.053418	0.030189										0.145175	0.186931	0.073285	0.113245
										0.085469	0.050316										0.066806	0.465274	0.094049	0.095944
										0.034964	0.138368										0.33403	1.38555	0.076949	0.073924
										0.092267	0.037737										0.050104	0.134549	0.107485	0.240646
										0.075756	0.0478										0.316044	0.156118	0.067178	0.108526
										0.034964	0.028932										0.069375	0.206446	0.037864	0.688907
										0.034964	0.164784										1.73053	1.17294	0.299247	0.091225
										0.215614	0.038995										0.056528	0.078059	0.179548	0.725082
										0.046619	0.099374										0.051389	0.202338	0.257719	0.338162
										0.195218	0.049058										0.998235	0.08114	0.085499	0.366473
										0.032051	0.323279										0.438093	0.045192	0.067178	0.094371
										0.206873	0.066668										0.182432	0.09552	0.15512	0.037748
										0.164139	0.101889										0.102778	0.074978	0.100156	0.119536
										0.119462	0.033963										0.053959	0.170498	0.076949	0.121109
										0.04759	0.040253										0.064236	0.042111	0.041528	0.069205
										0.032051	0.027674										0.047535	1.16883	0.458032	0.177732
										0.075756	0.066668										0.04625	1.10926	0.080614	0.086507
										0.093239	0.149689										0.940422	0.698424	1.11882	0.050331
										0.061188	0.138368										0.042396	0.693289	0.12947	0.088079
										0.042734	0.074216										0.131042	0.054436	0.058628	0.108526
										0.033993	0.035221										0.149029	0.076005	0.236955	0.048758
										0.050504	0.213842										0.963547	0.651178	0.063514	0.347599
										0.088382	0.091826										0.146459	0.06368	0.174663	0.116391
										0.040792	0.227679										0.250522	0.048273	0.064735	0.102235
										0.041763	0.213842										1.07532	0.036975	0.046414	0.195033
										0.285543	0.060379										0.476635	0.17666	0.090385	0.402649
										0.354501	0.148431										0.118195	0.119143	0.083056	0.067632
										0.252521	0.0478										0.432954	0.089357	0.095271	0.127401
										0.035936	0.083021										0.089931	0.045192	0.162449	0.089652
										0.039821	0.179879										0.038542	0.108872	0.075728	0.155712
										0.054389	0.171074										0.254377	0.041084	0.067178	0.06606
										0.289428	0.080505										0.052674	0.054306	0.043971	0.062914
										0.027195	0.120758										0.134897	0.053354	0.059849	0.081788
										0.058274	0.168558										0.14132	0.152439	0.063514	0.144702
										0.132088	0.563536										0.071945	0.080031	0.158784	0.987747
										0.13403	0.075474										0.444517	0.120999	0.098935	0.250083
										0.506013	0.135853										0.068091	0.073361	0.178327	0.333443
										0.054389	0.060379										0.092501	0.11814	0.062292	0.574089
										0.154426	0.040253										0.062952	0.054306	0.136799	0.037748
										0.098095	0.074216										0.71174	0.063834	0.0513	0.062914
										0.285543	0.122016										0.138751	0.043826	0.192984	0.154139
										0.046619	0.100632										0.49719	0.101944	0.103821	0.097516
										0.095181	0.13711										0.04625	0.055259	0.109928	0.122682
										0.320507	0.028932										0.069375	0.050495	0.072064	0.14942
										0.781844	0.449068										0.093785	0.11814	0.127028	0.165149
										0.616734	0.054089										0.044966	0.057165	0.12947	0.042467
										0.202017	0.108179										0.064236	0.03811	0.067178	0.058195
										0.090325	0.217616										0.191425	0.12481	0.092828	0.077069
										0.2836	0.036479										0.131042	0.071456	0.117256	0.083361
										0.293313	0.311958										0.092501	0.037157	0.420168	0.119536
										0.030108	0.16101										0.110487	0.106707	0.11237	0.130546
										1.12955	0.042768										0.820942	0.088605	0.174663	0.058195
										0.043706	0.646557										0.244099	0.137195	0.058628	0.059768
										0.039821	0.055347										0.1683	0.061928	0.156342	0.080215
										0.030108	0.052832										0.102778	0.044779	0.084278	0.047185
										0.561374	0.059121										1.29629	0.052401	0.048857	0.070778
										0.0709	0.074216										0.091216	0.170541	0.102599	0.062914
										0.844974	0.272963										0.150313	0.074314	0.061071	0.295695
										0.169966	0.050316										0.093785	0.108613	0.218634	0.267384
										0.041763	0.11321										0.241529	0.039063	0.04275	0.042467
										0.13403	0.055347										0.201703	0.068598	0.50811	0.064487
										0.148599	0.042768										0.693754	0.828888	0.062292	0.072351
										0.133059	0.054089										0.115626	0.521151	0.067178	0.130546
										0.372954	0.077989										0.039827	0.116235	0.086721	0.062914
										0.140829	0.050316										0.042396	0.054306	0.140463	0.086507
										0.387523	0.186168										0.28778	0.053354	0.102599	0.06606
										0.073814	0.134595										0.055243	0.116235	0.136799	0.06606
										0.191333	0.031447										0.440662	1.88548	0.167334	0.099089
										0.210758	0.036479										0.064236	0.664063	0.181991	0.091225
										0.327306	0.060379										0.044966	1.2681	0.227184	0.051904
										0.075756	0.072958										0.104063	1.77973	0.164891	0.069205
										0.052447	0.178621										0.037257	0.040015	0.360318	0.073924
										0.033993	0.129563										0.411114	0.043826	0.04275	0.341308
										0.04759	0.037737										0.043681	0.061928	0.29314	0.092798
										0.085469	0.171074										0.051389	0.091463	0.065957	0.056622
										0.036907	0.311958										0.222258	0.172447	0.095271	0.176159
										0.028166	0.116984										0.062952	0.042873	0.043971	0.110099
										0.035936	0.164784										0.043681	0.229611	0.0513	0.062914
										0.034964	0.222647										0.042396	0.504954	0.098935	0.078642
										0.106836	0.027674										0.853061	0.250572	0.094049	0.091225
										1.02174	0.0956										0.059098	0.603087	0.21497	0.056622
										0.029137	0.218873										0.083507	0.06955	0.164891	0.202897
										0.050504	0.049058										0.537017	0.103849	0.153899	0.169867
										0.05536	0.259126										0.444517	0.04859	0.084278	0.081788
										0.033993	0.101889										0.223543	0.040968	0.090385	0.179305
										0.058274	0.475484										0.087362	0.058117	0.040307	0.424669
										0.030108	0.313215										0.061667	0.06955	0.166113	0.143129
										0.033993	0.128305										0.183716	1.22618	0.040307	0.039321
										0.029137	0.181137										0.283925	0.049543	0.207641	0.116391
										0.062159	0.163526										0.49719	0.047637	0.323676	0.141556
										1.29271	0.288058										0.105348	0.070503	0.047635	0.190314
										1.55009	0.028932										0.456079	0.083841	0.230848	0.050331
										0.430257	0.057863										0.086077	0.116235	0.134356	0.081788
										0.764361	0.04151										0.066806	0.073361	0.15512	0.089652
										0.197161	0.035221										0.722018	1.82069	0.040307	0.047185
										0.171909	0.099374										0.519031	0.115282	0.216191	0.053477
										0.528352	0.265416										0.074514	0.092416	0.053742	0.06606
										0.058274	0.18491										0.064236	0.181021	0.150234	0.040894
										0.059245	0.037737										0.055243	0.050495	0.229627	0.040894
										0.225326	0.230195										0.044966	0.072409	0.262605	0.045613
										0.514754	0.067926										0.050104	1.34432	0.157563	0.19346
										0.135002	0.04151										0.537017	0.046684	0.12947	0.125828
										0.699289	0.110695										0.069375	0.87843	0.116035	0.512748
										0.477847	0.056605										0.038542	0.078125	0.18932	0.073924
										0.030108	0.138368										0.057813	0.099085	0.109928	0.037748
										0.067986	0.133337										0.050104	0.205793	0.186877	0.262665
										0.032051	0.163526										0.037257	0.133384	0.037864	0.039321
										0.038849	0.08931										0.052674	0.088605	0.149013	0.415231
										0.035936	0.300637										0.059098	0.564025	0.108706	0.769122
										0.027195	0.189942										0.079653	0.072409	0.085499	0.067632
										0.214643	0.276737										0.164445	0.379192	0.084278	0.174586
										0.073814	0.194973										0.04625	0.298209	0.04275	0.040894
										0.538064	0.027674										0.065521	0.154345	0.052521	0.045613
										0.327306	0.0717										0.041111	0.230564	0.068399	0.072351
										0.567201	0.052832										0.146459	0.119093	0.056185	0.187169
										0.235039	0.201263										1.859	0.075267	0.043971	0.110099
										0.151513	0.035221										0.298057	0.065739	0.13802	0.04404
										0.103922	0.247805										0.079653	0.037157	0.065957	0.080215
										0.040792	0.027674										0.35587	0.362996	0.102599	0.058195
										0.046619	0.031447										0.039827	0.057165	0.084278	0.099089
										0.068958	0.2868										0.071945	0.071456	0.192984	0.224917
										0.429286	0.16101										0.150313	0.110518	0.277262	0.141556
										0.046619	0.032705										0.945561	0.067645	0.084278	0.064487
										0.295255	0.040253										0.04882	0.093369	0.707201	0.081788
										0.445797	0.030189										0.050104	0.058117	0.128249	0.051904
										0.029137	0.045284										0.276217	0.113377	0.245505	0.092798
										0.030108	0.457873										0.055243	0.073361	0.116035	0.053477
										0.062159	0.083021										0.161876	0.071456	0.098935	0.069205
										0.027195	0.104405										0.123334	0.109566	0.289476	0.059768
										0.853715	0.114468										0.114341	0.06513	0.257719	0.040894
										0.029137	0.038995										0.044966	0.329599	0.153899	0.188742
										0.065073	0.055347										0.367433	0.18947	0.084278	0.124255
										0.133059	0.426426										0.615386	0.047367	0.113592	0.058195
										0.042734	0.030189										0.038542	0.201312	0.072064	0.059768
										0.033993	0.052832										0.041111	0.045394	0.048857	0.102235
										0.048562	0.027674										0.064236	0.143089	0.467803	0.289404
										0.027195	0.23271										0.071945	0.177628	0.153899	0.040894
										0.204931	0.114468										0.039827	0.075985	0.133135	0.039321
										0.034964	0.049058										0.062952	0.409531	0.081835	0.127401
										0.036907	0.432715										0.039827	0.079933	0.134356	0.062914
										0.053418	0.036479										0.124619	0.309862	0.067178	0.24851
										0.058274	0.072958										0.078369	0.374006	0.113592	0.05505
										0.059245	0.150947										0.051389	0.299007	0.047635	0.045613
										0.064101	0.177363										0.213265	0.175654	0.122142	0.148268
										0.114606	0.090568										0.052674	0.088814	0.102599	0.05233
										0.093239	0.203779										0.321182	0.951297	0.065957	0.108398
										0.089354	0.505673										0.074514	0.654263	0.135577	0.049838
										0.038849	0.145916										0.101494	1.24734	0.103821	0.225517
										0.033993	0.212584										0.047535	0.363151	0.083056	0.164465
										0.091296	0.1673										0.041111	0.175654	0.04275	0.128333
										0.046619	0.807567										0.106633	0.055262	0.041528	0.113381
										0.039821	0.225163										0.14389	0.802287	0.062292	0.051084
										0.048868	0.201263										0.111772	0.307889	0.058628	0.108398
										0.058841	0.090568										0.061667	0.153944	0.074651	0.083479
										0.105715	0.030189										0.078369	0.237824	0.055672	0.178171
										0.195473	0.217616										0.050104	0.16776	0.064528	0.10466
										0.036901	0.212584										0.178577	1.03024	0.074651	0.107152
										0.123667	0.084279										0.044966	0.317757	0.058202	0.219287
										0.239355	0.196231										0.044966	0.210193	0.075916	0.03987
										0.052858	0.061637										0.065521	0.579265	0.129057	0.056068
										0.046874	0.363531										0.079653	0.224009	0.080977	0.066035
										0.093747	0.172331										0.041111	0.058223	0.055672	0.044854
										0.085769	0.120758										0.052674	0.207233	0.065794	0.038624
										0.055849	0.100632										0.232536	0.337493	0.229013	0.145776
										0.166551	0.261642										0.057813	0.147037	0.074651	0.110889
										0.06682	0.217616										0.047535	0.054275	0.046815	0.061051
										0.146605	0.104405										0.231251	0.093748	0.049345	0.03987
										0.101726	0.046542										0.074514	0.045394	0.037958	0.047346
										0.063828	0.074216										0.052674	0.06513	0.16828	0.099676
										0.115688	0.378626										0.057813	0.098682	0.086038	0.28906
										0.097737	0.205037										0.053959	0.887154	0.053141	0.061051
										0.084771	0.040253										0.057813	1.03814	0.094895	0.054822
										0.076793	0.040253										0.066806	1.66576	0.044284	0.044854
										0.076793	0.142142										0.069375	0.259534	0.094895	0.0461
										0.041887	0.064153										0.40212	0.261508	0.060733	0.114627
										0.09275	0.032705										0.055243	0.327625	0.053141	0.056068
										0.175527	0.267931										0.043681	0.502293	0.094895	0.137054
										0.192481	0.081763										0.053959	0.268416	0.139179	0.041116
										0.131645	0.108179										0.218404	0.414466	0.159423	0.068527
										0.054852	0.665426										0.107917	0.047367	0.04808	0.107152
										0.058841	0.106921										0.060474	0.101643	0.092364	0.077249
										0.125661	0.150947										0.051987	0.048354	0.050611	0.067281
										0.111699	0.477999										0.038194	0.092761	0.049345	0.044854
										0.085769	0.510705										0.107156	0.143089	0.079712	0.057314
										0.048868	0.378626										0.043499	0.828931	0.039223	0.054822
										0.062831	0.618883										0.038194	0.099669	0.039223	0.061051
										0.165554	0.347179										0.06684	0.409531	0.060733	0.037378
										0.099731	0.37611										0.063657	0.153944	0.260645	0.03987
										0.034906	0.51951										0.060474	0.117432	0.051876	0.047346
										0.030917	0.0956										0.209008	0.123353	0.115139	0.059805
										0.09275	0.259126										0.086998	0.379927	0.046815	0.037378
										0.130648	0.06541										0.037133	0.310849	0.068324	0.08597
										0.033909	0.042768										0.209008	0.074012	0.037958	0.103414
										0.06682	0.402526										0.061535	0.299007	0.09616	0.03987
										0.078788	0.06541										0.086998	0.162826	0.142975	0.051084
										0.068814	0.0478										0.046682	0.31677	0.067059	0.053576
										0.031914	0.2151										0.080632	0.04046	0.051876	0.183154
										0.984347	0.106921										0.062596	0.037499	0.059467	0.059805
										0.087763	0.138368										0.050926	0.157892	0.049345	0.067281
										0.241349	0.335858										0.064718	0.070064	0.111343	0.042362
										0.171538	0.066668										0.318286	0.053288	0.044284	0.05233
										0.04089	0.274221										0.124132	0.039105	0.041754	0.041116
										0.06682	0.281768										0.530476	0.039105	0.053141	0.037378
										0.141618	0.211326										0.12201	0.066261	0.065794	0.048592
										0.114691	0.103147										0.171874	0.039105	0.174607	0.074757
										0.033909	0.030189										0.040316	0.135781	0.068324	0.073511
										0.036901	0.228937										0.947431	0.13035	0.050611	0.069773
										0.677175	0.062895										0.058352	0.036933	0.063263	0.037378
										0.960411	0.133337										0.836031	0.06952	0.039223	0.139546
										0.532564	0.187426										0.063657	0.05214	0.099956	0.226763
										0.034906	0.181137										0.085937	0.044536	0.050611	0.049838
										0.048868	0.678004										0.05517	0.181404	0.040488	0.037378
										0.209435	0.108179										0.828604	0.066261	0.253053	0.078495
										0.157575	0.074216										0.043499	0.250924	0.097425	0.053576
										0.352051	0.100632										0.084876	0.048881	0.039223	0.049838
										0.10771	0.186168										0.290701	0.437759	0.064528	0.056068
										0.314153	0.040253										0.043499	0.065175	0.050611	0.107152
										0.097737	0.079247										0.065779	0.247665	0.04808	0.05233
										0.710086	0.091826										0.043499	0.473605	0.04808	0.173187
										0.080782	0.196231										0.050926	0.056485	0.131588	0.083479
										0.223398	0.031447										0.328895	0.057571	0.170811	0.135808
										0.28922	0.279252										0.495465	0.094504	0.180933	0.05233
										1.12896	0.096858										0.381943	0.073865	0.249257	0.062297
										0.096739	0.157237										0.119888	0.167283	0.070855	0.145776
										0.071806	0.072958										0.07745	0.105366	0.054406	0.044854
										0.052858	0.0717										0.067901	0.13904	0.09616	0.261649
										0.072804	0.499384										0.046682	0.090159	0.187259	0.053576
										0.033909	0.06541										0.042438	0.227026	0.163219	0.082233
										0.14461	0.192458										0.426503	0.351945	0.055672	0.056068
										0.070809	0.573599										0.051987	0.557246	0.04555	0.103414
										0.053855	0.223905										0.060474	0.041278	0.040488	0.066035
										0.068814	0.116984										0.064718	0.115143	0.123996	0.088462
										0.176524	0.035221										0.660974	0.178145	0.039223	0.234238
										0.173532	0.0956										0.453027	0.150989	0.173341	0.048592
										0.046874	0.072958										0.076389	0.084728	0.182198	0.169449
										0.037898	0.033963										0.04456	0.065175	0.067059	0.057314
										0.227387	0.483031										0.518806	0.160765	0.087303	0.113381
										0.212427	0.093084										0.079571	0.159679	0.043019	0.074757
										0.064825	0.296863										0.288579	0.235716	0.188524	0.168203
										0.702107	0.046542										0.050926	0.21725	0.060733	0.062297
										0.045876	0.037737										0.206886	0.059744	0.194851	0.053576
										0.033909	0.516994										0.064718	0.0869	0.074651	0.05233
										0.259301	0.320763										0.212191	0.56485	0.077181	0.084724
										0.094745	0.051574										0.105034	1.09494	0.212564	0.054822
										0.033909	0.037737										0.970772	0.047795	0.1202	0.041116
										0.100729	0.153463										0.101852	0.066261	0.07212	0.037378
										0.027925	0.061637										0.050926	0.499675	0.098691	0.128333
										0.131645	0.046542										0.604743	0.167283	0.046815	0.206827
										0.259301	0.040253										0.051987	0.054313	0.145505	0.056068
										0.027925	0.088053										0.341627	1.20682	0.050611	0.201844
										0.062831	0.090568										0.357541	0.12166	0.04555	0.132071
										0.062831	0.384915										0.264177	0.585489	0.150567	0.155744
										0.037898	0.075474										0.043499	0.041278	0.044284	0.038624
										0.227387	0.054089										0.336322	1.17315	0.054406	0.061051
										0.324126	0.255352										0.037133	0.291115	0.129057	0.072265
										0.043882	0.038995										0.039255	0.222681	0.116404	0.127087
										0.152589	0.500642										0.328895	1.3828	0.061998	0.084724
										0.094745	0.164784										0.2228	0.210733	0.087303	0.080987
										0.10372	0.076731										0.05517	0.13035	0.106282	0.071019
										0.050863	0.067926										0.198398	0.076038	0.07212	0.143284
										0.179516	0.083021										0.114583	0.462743	0.142975	0.372538
										0.377981	0.030189										0.05517	0.110798	0.175872	0.28906
										0.17453	0.279252										0.042438	0.101021	0.26444	0.067281
										0.056847	0.030189										0.073206	0.0869	0.037958	0.114627
										0.171538	0.057863										0.046682	0.624594	0.094895	0.211811
										0.033909	0.079247										0.082754	0.048881	0.077181	0.09843
										0.063828	0.387431										0.259934	0.27808	0.091099	0.067281
										0.070809	0.433973										0.706595	0.058658	0.193586	0.041116
										0.078788	0.153463										0.15596	0.090159	0.229013	0.074757
										0.053855	0.096858										0.377699	0.057571	0.212564	0.307749
										0.045876	0.037737										0.725692	0.438845	0.037958	0.044854
										0.09275	0.027674										0.141107	0.061916	0.037958	0.048592
										0.07779	0.171074										0.26736	0.054313	0.326438	0.0461
										0.026927	0.247805										0.086998	0.047795	0.080977	0.245452
										0.074798	0.040253										0.341627	0.048881	0.175872	0.054822
										0.028922	0.0717										0.235532	0.315013	0.207503	0.042362
										0.091753	0.387431										0.04456	0.048881	0.260645	0.409917
										0.29815	0.096858										0.051987	0.865741	0.065794	0.159481
										0.091075	0.081763										0.08912	0.04345	0.084773	0.043608
										0.131339	0.203779										0.054109	0.316099	0.043019	0.134562
										0.084364	0.128305										0.039255	0.102108	0.167015	0.062297
										0.027802	0.027674										0.058352	1.13296	0.287215	0.067281
										0.12367	0.074216										0.048804	0.267218	0.068324	0.057314
										0.178315	0.042768										0.094425	0.039105	0.159423	0.049838
										0.163935	0.042768										0.074267	0.071693	0.04555	0.201844
										0.094909	0.027674										0.071084	0.635456	0.044284	0.062297
										0.033554	0.090568										0.219617	0.116229	0.065794	0.235484
										0.077653	0.084279										0.04456	0.157506	0.053141	0.059805
										0.070942	0.036479										0.105034	0.076801	0.105017	0.494641
										0.067108	0.075474										0.075328	0.039361	0.079712	0.171941
										0.054645	0.061637										0.108217	0.374406	0.070855	0.226763
										0.029719	0.074216										0.041377	0.171843	0.131588	0.066035
										0.041223	0.212584										0.076389	0.072001	0.106282	0.049838
										0.03643	0.050316										0.068962	0.087361	0.134118	0.099676
										0.07286	0.110695										0.083815	0.306245	0.06959	0.32893
										0.055604	0.114468										0.098669	0.356166	0.084773	0.10466
										0.06519	0.145916										0.040316	0.395526	0.091099	0.228008
										0.121753	0.028932										0.047743	0.073921	0.043019	0.10466
										0.061356	0.083021										0.118827	0.046081	0.053141	0.215549
										0.033554	0.028932										0.305554	0.069121	0.040488	0.043608
										0.070942	0.046542										0.045621	0.388806	0.089834	0.164465
										0.076695	0.231452										0.163387	0.070081	0.196116	0.082233
										0.046975	0.171074										0.039255	0.093122	0.112609	0.063543
										0.128463	0.035221										0.152777	1.57539	0.18979	0.113381
										0.047934	0.096858										0.04456	0.043201	0.308725	0.76252
										0.194612	0.105663										0.046682	0.396486	0.156893	0.605531
										0.104496	0.045284										0.141107	0.805453	0.060733	0.090954
										0.112166	0.087285										0.05517	0.329285	0.040488	0.132071
										0.118877	0.072737										0.145351	0.240964	0.112609	0.043608
										0.132298	0.126078										0.061535	0.138242	0.150567	0.285322
										0.099703	0.027479										0.079571	0.061441	0.459291	0.071019
										0.088199	0.158406										0.042438	0.175683	0.123996	0.118365
										0.402646	0.053341										0.054109	0.677771	0.04555	0.0922
										0.129422	0.13416										0.07745	0.047041	0.078446	0.23673
										0.106414	0.082436										0.128375	0.142082	0.037958	0.089708
										0.070942	0.064655										0.059413	0.155523	0.215095	0.087216
										0.064232	0.029095										0.071084	0.62977	0.101221	0.134562
										0.026843	0.11638										0.054109	0.057601	0.080977	0.10466
										0.129422	0.063039										0.180362	0.671051	0.065794	0.412409
										0.124629	0.121229										0.076389	0.067201	0.139179	0.095938
										0.10929	0.029095										0.134741	1.10882	0.054406	0.123349
										0.100662	0.135776										0.037133	0.053761	0.279623	0.20309
										0.394977	0.085668										0.286457	0.840014	0.105017	0.087216
										0.155306	0.067888										0.060474	0.399366	0.086038	0.0922
										0.131339	0.038793										0.107156	0.367686	0.268236	0.049838
										0.539738	0.119612										0.060474	0.045121	0.16828	0.318963
										0.063273	0.163255										0.067901	0.114242	0.059467	0.799898
										0.045058	0.108298										0.095486	0.056641	0.067059	0.102168
										0.061356	0.051724										0.045621	0.061441	0.043019	0.119611
										0.046017	0.15194										0.139617	0.897615	0.092364	0.059805
										0.034513	0.037177										0.204772	0.056641	0.204973	0.287814
										0.606845	0.030711										0.156681	1.31234	0.139179	0.110889
										0.134215	0.221445										0.158233	0.069121	0.064528	0.133316
										0.151472	0.064655										0.251311	0.055681	0.056937	0.226763
										0.162017	0.071121										0.232695	0.067201	0.206238	0.066035
										0.519605	0.129311										0.145822	0.113282	0.075916	0.041116
										0.031636	0.342673										0.062052	0.208323	0.051876	0.170695
										0.367175	0.117996										0.068257	0.058561	0.058202	0.181908
										0.504267	0.234376										0.076014	0.037441	0.053141	0.366309
										0.029719	0.038793										0.085322	0.254404	0.046815	0.084724
										1.45911	0.029095										0.26217	0.059521	0.049345	1.4453
										0.106414	0.03556										0.068257	0.055681	0.046815	0.062297
										0.051769	0.072737										0.065155	0.070081	0.09363	0.094692
										0.038347	0.085668										0.229593	0.037441	0.094895	0.331422
										0.382514	0.100216										0.040334	0.082561	0.050611	0.05856
										0.204199	0.046875										0.049642	0.192003	0.037958	0.053576
										0.870483	0.080819										0.049642	0.116162	1.21212	0.269125
										0.400729	0.032328										0.147374	0.109442	0.04555	0.140792
										0.38539	0.143858										0.041885	0.052801	0.111343	0.084724
										0.02876	0.056573										0.07136	0.088321	0.105017	0.115873
										0.106414	0.05819										0.077565	0.091201	0.270767	0.1383
										0.091075	0.033944										0.080668	0.141122	0.051876	0.446049
										0.067108	0.103449										0.100835	0.086401	0.088569	0.14453
										0.112166	0.087285										0.138066	0.082561	0.282154	0.063543
										0.043141	0.15194										0.046539	0.076801	0.307459	0.214303
										0.317324	0.038793										0.058949	0.107522	0.055672	0.595563
										0.205158	0.05819										0.113245	0.106095	0.049345	0.270371
										0.026843	0.046875										0.299401	0.038194	0.039223	0.062297
										0.103538	0.090517										0.139617	0.038194	0.172076	0.066035
										0.029719	0.080819										0.065155	0.048804	0.118935	0.145776
										0.557953	0.311962										0.080668	0.072145	0.089834	0.464739
										0.096827	0.127694										0.068257	0.234471	0.039223	0.056068
										0.040265	0.090517										0.099283	0.07745	0.050611	0.348865
										0.12367	0.080819										0.057398	0.232349	0.061998	0.108398
										0.079571	0.129311										0.138066	0.067901	0.111343	0.080987
										0.171604	0.109914										0.041885	0.071084	0.153097	0.068527
										0.086281	0.059806										0.054296	0.112461	0.061998	0.037378
										0.052727	0.214979										0.133412	0.048804	0.139179	0.118365
										0.113124	0.190733										0.719804	0.109278	0.149301	0.621728
										0.184067	0.050108										0.040334	0.172935	0.080977	0.087216
										0.047934	0.029095										0.038783	0.101852	0.039223	0.219287
										0.305819	0.032328										0.046539	0.107156	0.098691	0.082233
										0.033554	0.030711										0.086873	0.040316	0.049345	1.10889
										0.177356	0.054957										0.074462	0.041377	0.110078	0.097184
										0.266514	0.164871										0.077565	0.051987	0.055672	0.043608
										0.148596	0.048492										0.111694	0.05517	0.044284	0.85472
										0.095868	0.042026										0.040334	0.039255	0.061998	0.399949
										0.186943	0.038793										0.299401	0.071084	0.154362	0.140792
										0.185984	0.061423										0.041885	0.826482	0.039223	0.311487
										0.07286	0.050108										0.265272	0.071084	0.054406	0.089708
										0.034513	0.050108										0.041885	0.046682	0.065794	0.102168
										0.090116	0.03556										1.08126	0.061535	0.056937	0.211811
										0.111207	0.063039										0.044988	0.043499	0.139179	0.828555
										0.033554	0.027479										0.049642	0.531537	0.050611	0.0461
										0.080529	0.137393										0.21408	0.145351	0.122731	0.0922
										0.027802	0.255389										0.058949	0.754338	0.083507	0.088462
										0.040265	0.147091										0.051193	0.617475	0.421333	0.095938
										0.133257	0.082436										0.397133	0.068962	0.063263	0.03987
										0.161059	0.053341										0.179951	0.693863	0.050611	0.047346
										0.106414	0.114763										0.11945	0.124132	0.137914	0.463493
										0.13805	0.436424										0.359902	1.42274	0.046815	0.315225
										0.161059	0.051724										0.055847	0.302372	0.06959	0.05856
										0.289522	0.042026										0.076014	0.038194	0.073385	0.124595
										0.043141	0.043642										0.043436	0.274787	0.056937	0.067281
										0.027802	0.371768										0.085322	0.051987	0.078446	0.044854
										0.062314	0.163255										0.060501	0.041377	0.056937	0.061051
										0.029719	0.027479										0.376966	0.046682	0.060733	0.048592
										0.029719	0.038793										0.133412	0.27797	0.061998	0.218041
										0.02876	0.132543										0.693431	0.408467	0.060733	0.080987
										0.030678	0.04041										0.049642	0.081693	0.051876	0.205581
										0.049851	0.132543										0.082219	0.039255	0.050611	0.133316
										0.219538	0.032328										0.207874	0.09973	0.04555	0.105906
										0.161059	0.139009										0.07136	0.198398	0.041754	0.048592
										0.270348	0.087285										0.079116	0.07745	0.164484	0.156989
										0.031636	0.063039										0.373864	0.444539	0.148036	0.076003
										0.051769	0.289333										0.066706	1.29967	0.126526	0.05233
										0.071901	0.032328										0.187707	0.274787	0.084773	0.059805
										0.096827	0.048492										0.041885	0.06684	0.041754	0.037378
										0.033554	0.045259										0.094629	0.808446	0.158158	0.05856
										0.104496	0.221445										0.544507	0.308737	0.039223	0.038624
										0.033554	0.114763										0.136515	0.604743	0.074651	0.125841
										0.038347	0.276402										0.395582	0.324652	0.04808	0.766258
										0.034513	0.087285										0.058949	0.038194	0.068324	0.03987
										0.040265	0.061423										0.057398	0.27797	0.116404	0.042362
										0.135174	0.19235										0.527442	0.115644	0.053141	0.064789
										0.162017	0.108298										0.041885	0.74585	0.313786	0.069773
										0.057521	0.037177										0.063603	1.15962	0.055672	0.038624
										0.039306	0.048492										0.055847	0.47849	0.04555	0.108398
										0.02876	0.124462										0.193913	0.263116	0.04808	0.613006
										0.096532	0.22791										0.902857	0.051987	0.067059	0.120857
										0.048735	0.032328										0.04809	0.147472	0.07212	0.038624
										0.133083	0.153556										0.515032	0.902871	0.044284	0.03987
										0.100281	0.11638										0.086873	0.292823	0.046815	0.246698
										0.225867	0.431574										0.058949	0.048804	0.041754	0.260403
										0.086223	0.30388										0.044988	0.607926	0.089834	0.054822
										0.111528	0.148707										0.147374	0.387248	0.079712	0.064789
										0.029053	0.467135										0.186156	0.362846	0.092364	0.237976
										0.088097	0.042026										0.057398	0.158082	0.108813	0.071019
										0.036551	0.124462										0.116348	0.042438	0.123996	0.044854
										0.1209	0.208513										0.086873	0.154899	0.158158	0.110889
										0.152765	0.071121										0.076014	0.054109	0.122731	0.069773
										0.149953	0.059806										0.327324	0.067901	0.065794	0.041116
										0.083411	0.032328										0.054296	0.05517	0.068324	0.068527
										0.099344	0.063039										0.085322	0.046682	0.063263	0.044854
										0.073102	0.140625										0.100835	0.078511	0.051876	0.047346
										0.034677	0.140625										0.060501	0.068067	0.196116	0.042362
										0.162137	0.092134										0.14272	0.053886	0.067059	0.038624
										0.082474	0.056573										0.141168	0.052941	0.070855	0.128333
										0.139644	0.046875										0.093078	0.08792	0.041754	0.03987
										0.142455	0.061423										0.249759	0.108718	0.065794	0.123349
										0.229616	0.037177										0.457634	0.542644	0.04555	0.116994
										0.034677	0.05819										0.085322	0.08981	0.060733	0.054416
										0.070291	0.064655										0.063603	1.37741	0.041754	0.047614
										0.059981	0.129311										0.283888	0.066176	0.065794	0.213582
										0.111528	0.202048										0.054296	0.099264	0.061998	0.07074
										0.044986	0.184268										0.421954	0.211764	0.068324	0.076182
										0.114339	0.484915										0.324222	0.317646	0.077181	0.178211
										0.070291	0.114763										0.34594	0.136134	0.040488	0.106111
										0.273664	0.106681										0.038783	0.248633	0.037958	0.123796
										0.121837	0.122845										0.437467	0.069958	0.054406	0.065299
										0.447985	0.043642										0.840805	0.15126	0.056937	0.133318
										0.043112	0.421876										0.052744	0.229726	0.108813	0.048974
										0.190253	0.339441										0.373864	0.086974	0.04555	0.057136
										0.16776	0.056573										0.39403	0.044433	0.073385	0.087065
										0.059981	0.198815										0.049642	0.057668	0.089834	0.081624
										0.189316	0.153556										0.089975	0.050105	0.04555	0.106111
										0.387067	0.160022										0.94164	0.187184	0.107548	0.077542
										0.032802	0.117996										0.076014	1.49936	0.06959	0.065299
										0.177132	0.208513										0.096181	0.039706	0.123996	0.042172
										0.036551	0.085668										0.460736	0.039706	0.064528	0.087065
										0.035614	0.24569										0.380069	0.318591	0.041754	0.141481
										0.108716	0.19235										0.121002	0.172058	0.047889	0.159166
										0.038425	0.176186										0.044988	0.693904	0.04915	0.039451
										0.517338	0.266703										0.179951	0.339389	0.112162	0.065299
										0.109653	0.032328										0.457634	0.042542	0.044109	0.063938
										0.070291	0.050108										0.041885	0.098319	0.05293	0.153724
										0.129335	0.088901										0.131861	0.904722	0.04915	0.148283
										0.072165	0.029095										0.058949	0.03876	0.041588	0.081624
										0.568885	0.043642										0.423505	0.640018	0.042848	0.053055
										0.19119	0.027479										0.786509	0.323318	0.069313	0.046253
										0.072165	0.064655										0.046539	0.831929	0.080656	0.089786
										0.028116	0.050108										0.058949	0.105882	0.157531	0.072101
										0.177132	0.126078										0.063603	0.12668	0.132326	0.107471
										0.049672	0.066272										0.263721	0.077521	0.286076	0.100669
										0.482662	0.255389										1.29223	1.17605	0.097039	0.057136
										0.240862	0.092134										0.038783	0.558716	0.119723	0.047614
										0.158388	0.106681										0.07136	0.141806	0.151229	0.110192
										0.898781	0.281251										0.037231	0.076575	0.080656	0.081624
										0.129335	0.066272										0.080668	0.838546	0.05167	0.112913
										0.04686	0.114763										0.243554	1.16092	0.243227	0.077542
										0.034677	0.407329										0.432813	0.053886	0.123504	0.091146
										0.041237	0.03556										0.158233	0.697686	0.129805	0.107471
										0.101218	0.602911										0.525891	0.294011	0.089477	0.134679
										0.16776	0.030711										0.088424	0.079411	0.097039	0.047614
										0.029991	0.038793										0.062052	0.050105	0.045369	0.047614
										0.082474	0.063039										0.055847	0.066176	0.059232	0.06938
										0.30553	0.101832										0.271478	0.146533	0.074354	0.053055
										0.260544	0.04041										0.454531	0.539808	0.088217	0.050335
										0.137769	0.126078										0.07136	0.062395	0.233145	0.092507
										0.222118	0.04041										0.293196	0.047269	0.05293	0.040812
										0.104967	0.053341										0.068257	0.475523	0.042848	0.114273
										1.80506	0.105065										0.131861	0.065231	0.105861	0.051695
										0.09747	0.570583										0.169092	0.510502	0.070574	0.134679
										0.219306	0.26832										0.117899	0.03876	0.30624	0.06938
										0.095595	0.219828										0.912165	0.072794	0.063012	0.108831
										0.637301	0.067888										0.052744	0.234453	0.120984	0.126516
										0.109653	0.615842										0.245106	0.055777	0.1046	0.038091
										0.104967	0.190733										0.07136	0.071848	0.128545	0.185013
										0.107779	0.147091										0.128758	0.588022	0.149969	0.039451
										0.048735	0.082436										0.21408	0.060504	0.05167	0.038091
										0.119963	0.046875										0.197015	0.045378	0.065533	0.126516
										0.19119	0.045259										0.221836	0.040651	0.054191	0.038091
										0.35895	0.181035										0.041885	0.055777	0.042848	0.054416
										0.085286	0.043642										0.22649	0.046323	0.288596	0.085705
										0.432052	0.13416										0.575533	0.073739	0.081916	0.039451
										0.332709	1.06681										0.372312	0.299683	0.05041	0.672034
										0.209934	0.069504										0.085322	0.056722	0.25583	0.159166
										0.032802	0.185884										0.390928	0.154096	0.15249	0.048974
										0.04686	0.184268										0.068257	0.039706	0.098299	0.133318
										0.089972	0.179419										0.097732	0.062395	0.236926	0.096588
										0.103093	0.11153										1.12314	0.059559	0.088217	0.066659
										0.132146	0.042026										0.086873	0.380986	0.047889	0.066659
										0.187441	0.331359										0.21408	0.198528	0.081916	0.059857
										1.16026	0.145475										0.228041	0.106146	0.074354	0.048974
										0.195876	0.051724										0.082219	0.107061	0.039068	0.246231
										0.319588	0.046875										0.055847	0.132682	0.214242	0.058497
										0.132146	0.098599										0.423505	0.072289	0.367992	0.205419
										0.085286	0.244074										0.401787	0.038432	0.060492	0.121075
										1.12371	0.046875										0.280785	0.049413	0.146188	0.110192
										0.171509	0.216595										0.694983	0.042092	0.079395	0.391793
										0.068416	0.088901										0.079116	0.105231	0.181475	0.044893
										0.530459	0.155173										0.197015	0.041177	0.04915	0.074822
										0.084349	0.164871										0.082219	0.046668	0.084436	0.501985
										0.030928	0.221445										0.103937	0.615829	0.170133	0.087065
										0.215558	0.119612										0.037231	0.045753	0.046629	0.048974
										0.08716	0.231143										0.406441	0.156474	0.070574	0.048974
										0.314902	0.156789										0.122553	0.123532	0.054191	0.074822
										0.587629	0.16972										0.141168	0.256214	0.065533	0.044893
										0.092783	0.042026										0.043436	0.053073	0.04915	0.357783
										0.527648	0.400863										0.268375	0.041177	0.046629	0.097948
										0.071228	0.077586										0.038783	0.301967	0.065533	0.157806
										1.71415	0.114763										0.049642	0.060393	0.064272	0.681556
										0.031865	0.276402										0.062052	0.042092	0.273473	0.761819
										0.036551	0.04041										0.065155	0.507853	0.10334	0.044893
										0.095595	0.043642										0.046539	0.046668	0.170133	0.089786
										0.492971	0.21013										0.057398	0.278175	0.046629	0.089786
										0.250234	0.163255										0.058949	0.334908	0.195338	0.34554
										0.386129	0.03556										0.049642	0.791519	0.127285	0.133318
										0.049672	0.345906										0.07136	0.880278	0.177695	0.34554
										0.06373	0.066272										0.069809	0.053073	0.080656	0.048974
										0.327085	0.349139										0.195464	0.261704	0.040328	0.384991
										0.715089	0.181035										0.077565	0.110721	0.086957	0.123796
										0.209934	0.054957										0.068257	1.00198	0.05293	0.099309
										0.041237	0.032328										0.052744	0.204056	0.209201	0.251673
										0.093721	0.11638										0.041885	3.22647	0.098299	0.315611
										0.041237	0.085668										0.11945	0.668902	0.109641	0.130598
										0.329897	0.090517										0.046539	0.121702	0.066793	0.100669
										0.044986	0.088901										0.058949	0.383406	0.083176	0.057136
										0.048735	0.030711										0.172194	0.040262	0.088217	0.285682
										0.031865	0.042026										0.054296	0.060393	0.147449	0.091146
										0.041237	0.027479										0.125655	0.144578	0.230625	0.133318
										0.141518	0.074354										0.079116	0.059478	0.070574	0.040812
										0.367385	0.032328										0.082219	0.095165	0.149969	0.106111
										0.229616	0.074354										0.726009	0.058563	0.117203	0.099309
										0.106842	0.066272										0.040334	1.01845	0.098299	0.13876
										0.075914	0.085668										0.150476	0.557266	0.05293	0.27888
										0.282099	0.033944										0.043436	0.051243	0.119723	0.76318
										0.160262	0.119612										0.041885	0.089675	0.158791	0.307449
										0.038425	0.084052										0.038783	0.987339	0.114682	0.492462
										0.043112	0.538256										0.044988	0.080524	0.042848	1.27333
										0.111528	0.148707										0.069809	0.482232	0.056711	1.0407
										0.052484	0.09375										0.07136	0.045753	0.127285	1.1917
										0.032802	0.092134										0.085322	0.037517	0.081916	0.077542
										0.04686	0.04041										0.044988	0.063138	0.182736	0.353702
										0.083411	0.033944										0.044988	0.901325	0.085697	0.130598
										0.042174	0.032328										0.038783	0.042092	0.127285	0.59177
										0.059981	0.153556										0.041885	0.044837	0.118463	0.081624
										0.039363	0.108298										0.057398	0.062223	0.275994	0.221744
										0.058107	0.101832										0.043436	0.054903	0.149969	0.191815
										0.061856	0.038793										0.11945	0.08876	0.089477	0.095227
										0.035614	0.029095										0.082219	0.09791	0.04915	0.042172
										0.039363	0.032328										0.072911	0.049413	0.068053	1.47875
										0.085286	0.054957										0.043436	0.142748	0.041588	0.044893
										0.027179	0.033944										0.07136	0.056733	0.275994	0.081624
										0.038425	0.096983										0.156681	0.400792	0.151229	0.122435
										0.059044	0.085668										0.07136	0.117126	0.079395	0.096588
										0.083411	0.289333										0.04809	0.373341	0.086957	0.156445
										0.027179	0.059806										0.237349	0.064054	0.168873	0.044893
										0.194002	0.103449										0.085322	0.819885	0.057971	0.042172
										0.064667	0.042026										0.043436	0.182095	0.057971	0.06802
										0.056232	0.085668										0.063603	0.157389	0.093258	0.186374
										0.055295	0.092134										0.069809	0.064969	0.086957	0.1374
										0.062793	0.053341										0.07136	0.228763	0.060492	0.284322
										0.039024	0.090517										0.054296	0.258044	0.061752	0.118354
										0.060626	0.066272										0.237349	0.049413	0.065533	0.595852
										0.027177	0.04041										0.041885	0.120787	0.128545	0.042172
										0.049477	0.046875										0.079116	0.054903	0.046629	0.197257
										0.064807	0.051724										0.046539	0.27543	0.161311	0.79719
										0.162367	0.148707										0.040334	0.207716	0.060492	0.157806
										0.087803	0.092134										0.113245	0.145493	0.055451	0.367306
										0.076654	0.046875										0.043436	0.169284	0.042848	0.092507
										0.049477	0.030711										0.139617	0.391642	0.047889	0.110192
										0.031358	0.213363										0.088424	0.578312	0.142408	0.040812
										0.040417	0.038793										0.158233	0.057648	0.055451	0.130598
										0.091288	0.053341										0.049642	0.040262	0.245748	0.077542
										0.105225	0.11638										0.103937	0.045753	0.037807	0.053055
										0.138674	0.038793										0.066706	0.052762	0.373032	0.057136
										0.036236	0.033944										0.148925	0.071197	0.055451	0.062578
										0.349123	0.056573										0.069809	0.065476	0.04915	0.043533
										0.062717	0.066272										0.111694	0.044498	0.047889	0.459812
										0.060626	0.274785										0.075294	0.058483	0.055451	0.163247
										0.295466	0.13416										0.06078	0.062297	0.05041	0.091146
										0.040417	0.053341										0.059873	0.059119	0.074354	0.06938
										0.056445	0.080819										0.098881	0.086454	0.192817	0.07074
										0.046689	0.202048										0.039915	0.037506	0.167613	0.053055
										0.033449	0.07597										0.040822	0.061662	0.178955	0.089786
										0.029268	0.066272										0.044451	0.256182	0.20668	0.119715
										0.901728	0.184268										0.044451	0.416375	0.071834	0.111552
										0.946326	0.029095										0.055337	0.062297	0.405799	0.044893
										0.070382	0.1875										0.108859	0.204056	0.365471	0.236708
										0.045295	0.231143										0.04808	0.043227	0.065533	0.110192
										0.773507	0.051724										0.109767	0.080732	0.095779	0.073461
										0.208359	0.037177										0.07983	0.090268	0.402018	0.047614
										0.512187	0.033944										0.15331	0.151929	0.109641	0.062578
										0.075957	0.114763										0.04808	0.079461	0.05167	0.042172
										0.388147	0.202048										0.259448	0.209777	0.063012	0.212221
										0.074563	0.160022										0.058966	0.129045	0.047889	0.053055
										0.852948	0.147091										0.089809	0.097896	0.117203	0.042172
										0.09965	0.056573										0.45721	0.121416	0.055451	0.145562
										0.063414	0.046875										0.037194	0.055305	0.094518	0.07074
										0.117071	0.073385										0.375565	0.181171	0.457469	0.180932
										0.068988	0.097425										0.318414	0.183714	0.15375	0.333296
										0.03763	0.046815										0.084366	0.218041	0.108381	0.34554
										0.115678	0.082242										0.059873	0.093446	0.064272	0.119715
										0.084319	0.074651										0.065316	0.253639	0.249529	0.129237
										0.464104	0.040488										0.102509	0.075647	0.093258	0.153724
										0.337277	0.063263										0.179618	0.056576	0.15249	0.136039
										0.097559	0.121465										0.150589	0.096625	0.054191	0.155085
										0.548423	0.035427										0.052615	0.10616	0.079395	0.06802
										0.036933	0.051876										0.061687	0.102346	0.098299	0.323773
										0.521246	0.09363										0.842754	0.237112	0.042848	0.118354
										0.040417	0.125261										0.058058	0.066112	0.110902	0.057136
										0.571419	0.037958										0.350165	0.041955	0.120984	0.059857
										0.104528	0.035427										0.053523	0.107431	0.057971	0.085705
										0.091288	0.123996										0.069851	0.040048	0.126025	0.161887
										0.059233	0.040488										0.190504	0.096625	0.05041	0.062578
										0.027874	0.036693										0.135167	0.064204	0.041588	0.097948
										0.384663	0.051876										0.058058	0.20342	0.05041	0.066659
										0.04878	0.060733										0.129724	0.038141	0.095779	0.072101
										0.309403	0.027836										0.052615	0.116967	0.045369	0.062578
										0.216024	0.116404										0.038101	0.050219	0.432264	0.050335
										0.066201	0.027836										0.146053	0.038141	0.148709	0.074822
										0.092681	0.059467										0.485332	0.074375	0.075615	0.046253
										0.232749	0.043019										0.59147	0.911576	0.113422	0.044834
										0.049477	0.061998										0.056244	0.064204	0.10208	0.059779
										0.202087	0.034162										0.120653	0.430996	0.120984	0.059779
										0.066898	0.068324										0.047172	0.047041	0.068053	0.058118
										0.149127	0.142975										0.044451	0.037506	0.109641	0.074723
										0.067595	0.044284										0.650435	0.063569	0.061752	0.071402
										1.03204	0.136649										0.822796	0.124595	0.093258	0.068081
										0.032055	0.14424										0.110674	0.261268	0.073094	0.0631
										0.074563	0.04808										0.156032	0.082639	0.157531	0.044834
										0.050173	0.065794										0.136982	0.043227	0.15375	0.078044
										0.390238	0.07212										0.332928	0.038141	0.160051	0.051476
										0.06411	0.067059										0.165104	1.56697	0.191557	0.066421
										0.084319	0.053141										0.371029	0.200242	1.00946	0.074723
										0.094772	0.040488										0.068037	0.111881	0.127285	0.041513
										0.121949	0.037958										0.065316	0.065476	0.192817	0.053136
										0.437624	0.139179										0.170547	0.090268	0.362951	0.054797
										0.027177	0.027836										0.243119	0.297502	0.428483	0.073063
										0.075957	0.031632										0.077109	0.096625	0.160051	0.074723
										0.059929	0.044284										0.063501	0.490115	0.211721	0.06476
										0.236233	0.04555										0.078016	0.088996	0.118463	0.051476
										0.036933	0.193586										0.05443	0.118238	0.62004	0.071402
										0.039721	0.046815										0.246748	0.21677	0.076875	0.051476
										0.077351	0.031632										0.216812	0.142394	0.186516	0.099631
										0.055748	0.061998										0.269427	0.047041	0.063012	0.159409
										0.040417	0.084773										0.038101	0.3509	0.057971	0.09797
										0.087803	0.032897										0.07348	0.215498	0.107121	0.049815
										0.089197	0.068324										0.106138	0.094717	0.122244	0.242435
										0.044599	0.507371										0.352886	0.369335	0.081916	0.076384
										0.116512	0.036693										0.192318	0.108703	0.165092	0.061439
										0.066578	0.061998										0.056244	0.56894	0.302459	0.415129
										0.0921	0.415007										0.3293	0.368063	0.097039	0.099631
										0.059921	0.148036										0.041729	0.06039	0.088217	0.102952
										0.049934	0.074651										0.084366	0.06039	0.059232	0.106273
										0.06214	0.110078										0.087088	0.837201	0.071834	0.038192
										0.228586	0.097425										0.178711	0.261903	0.055451	0.074723
										0.318467	0.148036										0.065316	0.377598	0.25835	0.041513
										0.056592	0.235339										0.075294	0.120145	0.320102	0.09631
										0.046605	0.036693										0.042637	0.180535	0.36169	0.091328
										0.067688	0.032897										0.039008	0.061662	0.107121	0.066421
										0.036618	0.051876										0.107952	0.061026	0.180215	0.071402
										0.184201	0.07212										0.210462	0.14303	0.117203	0.078044
										0.397252	0.193586										0.132446	0.040684	0.268432	0.038192
										1.01421	0.050611										0.04808	0.250461	0.127285	0.046494
										0.275191	0.158158										0.442695	0.037506	0.328924	0.190959
										0.027741	0.43019										0.046265	0.079461	0.042848	0.069742
										0.533738	0.036693										0.097973	0.038777	0.05041	0.307195
										0.088771	0.265706										0.389173	0.123959	0.131066	0.199262
										0.02996	0.268236										0.228605	0.083275	0.115943	0.370295
										0.149802	0.326438										0.225883	1.19128	0.224324	0.104612
										0.03218	0.179668										0.094345	0.474859	0.15501	0.265682
										0.049934	0.180933										0.059873	1.14932	0.437305	0.19262
										0.097648	0.270767										0.436345	0.14748	0.486455	0.156088
										0.088771	0.074651										0.230419	0.553048	0.045369	0.074723
										0.099868	0.284685										0.374658	0.585468	0.283555	0.154428
										0.028851	0.030366										0.04808	0.087089	0.352869	0.215867
										0.072127	0.034162										0.061687	0.132859	0.085697	0.0631
										0.563698	0.078446										0.066223	0.040048	0.190297	0.104612
										0.444966	0.039223										0.052615	0.283517	0.209201	0.046494
										0.780078	0.031632										0.212276	1.03045	0.286076	0.044834
										0.427212	0.06959										0.040822	0.097896	0.431004	0.071402
										0.056592	0.229013										0.136982	0.046405	0.078135	0.044834
										0.069907	0.317581										0.04808	0.657301	0.117203	0.041513
										0.048824	0.058202										0.143332	0.083911	0.095779	0.092989
										0.393923	0.056937										0.040822	0.211684	0.057971	0.089668
										0.878836	0.053141										0.173268	0.042591	0.192817	0.111255
										0.037728	0.039223										0.051708	0.129045	0.118463	0.094649
										0.127609	0.029101										0.071666	0.042591	0.085697	0.066421
										0.419444	0.032897										0.043544	0.057212	0.117203	0.101291
										0.52597	0.488392										0.045358	0.075647	0.056711	0.083026
										0.40169	0.394763										0.045358	0.040684	0.151229	0.106273
										0.079894	0.370723										0.136982	0.040048	0.118463	0.051476
										0.30959	0.027836										0.204111	0.09726	0.054191	0.09797
										0.152021	0.173341										0.050801	0.07819	0.215502	0.262361
										0.055482	0.383375										0.437252	0.075647	0.127285	0.079705
										0.085442	0.032897										0.157846	0.082004	0.143668	0.144465
										0.228586	0.060733										0.282127	1.28155	0.190297	0.0631
										0.084333	0.063263										0.297549	0.057212	0.35791	0.071402
										1.38594	0.146771										0.163289	0.265082	0.366731	0.078044
										0.367291	0.1202										0.371029	0.20787	0.085697	0.142804
										0.197516	0.080977										0.40913	0.076283	0.137367	0.038192
										0.073236	0.161954										0.117024	0.03687	0.078135	0.046494
										0.135376	0.036693										0.059873	0.058483	0.068053	0.132841
										0.470488	0.211299										0.308435	0.174178	0.107121	0.212546
										0.357305	0.09616										0.110674	0.21232	0.107121	0.071402
										0.797832	0.387171										0.058058	0.113152	0.274733	0.084686
										0.122061	0.139179										0.038101	0.049584	0.31002	0.073063
										0.057701	0.26444										0.055337	0.04132	0.331444	0.112915
										0.787845	0.079712										0.116117	0.07819	0.239447	0.078044
										0.474927	0.111343										0.098881	0.076422	0.085697	0.043173
										0.418335	0.657938										0.070759	0.05152	0.045369	0.051476
										0.419444	0.079712										0.058058	0.044651	0.215502	0.144465
										0.145363	0.061998										0.049894	0.047227	0.168873	0.237454
										0.4949	0.108813										0.064409	0.042933	0.243227	0.048155
										0.072127	0.092364										0.039008	0.050661	0.054191	0.104612
										0.27963	0.094895										0.065316	0.040357	0.060492	0.078044
										0.135376	0.078446										0.06078	0.155419	0.303719	0.126199
										0.071017	0.064528										0.044451	0.060107	0.093258	0.562914
										0.149802	0.037958										0.048987	0.047227	0.040328	0.059779
										0.635825	0.107548										0.050801	0.099606	0.1046	0.039852
										1.79873	0.061998										0.071666	0.531516	0.066793	0.046494
										0.099868	0.059467										0.070759	0.086726	0.040328	0.076384
										0.0921	0.218891										0.043544	0.066118	0.071834	0.302214
										0.162008	0.036693										0.04808	0.052379	0.15627	0.25904
										0.096539	0.04808										0.053523	0.990904	0.091998	0.056457
										0.066578	0.33656										0.059873	0.070411	0.190297	0.066421
										0.076565	0.132853										0.054392	0.150267	0.039068	0.119557
										0.046605	0.054406										0.045327	1.01581	0.139887	0.039852
										0.039947	0.436516										0.116716	0.074704	0.298678	0.199262
										0.066707	0.059467										0.040794	0.081574	0.069313	0.104612
										0.040024	0.268236										0.052126	0.185473	0.224324	0.044834
										0.088053	0.029101										0.04306	1.70703	0.126025	0.112915
										0.044471	0.164484										0.069123	0.127942	0.288596	0.088007
										0.045361	0.031632										0.261762	0.056672	0.118463	0.071402
										0.099616	0.027836										0.045327	0.274774	0.080656	0.245756
										0.065817	0.428925										0.077055	0.425041	0.260871	0.109594
										0.072043	0.053141										0.086121	0.447367	0.10208	0.058118
										0.128077	0.105017										0.070256	0.080715	0.039068	0.396863
										0.038245	0.757893										0.090653	0.073846	0.090738	0.06476
										0.045361	0.084773										0.041927	0.05152	0.066793	0.139483
										0.035577	0.055672										0.037395	1.07334	0.294897	0.076384
										0.103173	0.029101										0.129181	0.598492	0.085697	0.044834
										0.055144	0.112609										0.079322	0.041216	0.097039	0.048155
										0.044471	0.123996										0.045327	0.03864	0.10208	0.068081
										0.056034	0.236605										0.258362	0.065259	0.040328	0.134502
										0.072043	0.065794										0.037395	0.149408	0.080656	0.074723
										0.043582	0.210034										0.08952	0.226689	0.136106	0.179336
										0.18589	0.083507										0.038528	0.058389	0.059232	0.083026
										0.03113	0.074651										0.148445	0.103899	0.039068	0.041513
										0.040914	0.268236										0.038528	0.089302	0.044109	0.046494
										0.057813	0.051876										0.077055	0.351196	0.071834	0.06476
										0.264159	0.246727										0.073656	0.211233	0.112162	0.109594
										0.04714	0.207503										0.050993	0.082432	0.105861	0.078044
										0.076491	0.159423										0.040794	0.047227	0.090738	0.081365
										0.03024	0.031632										0.053259	0.261894	0.055451	0.039852
										0.04714	0.18979										0.047593	0.40615	0.056711	0.092989
										0.117404	0.125261										0.105385	0.609655	0.219283	0.139483
										0.035577	0.079712										0.060058	0.511767	0.098299	0.169373
										0.203678	0.039223										0.044194	0.079856	0.041588	0.039852
										0.067596	0.059467										0.041927	0.168299	0.078135	0.12786
										0.038245	0.034162										0.037395	0.559852	0.126025	0.114576
										0.034688	0.30999										0.082721	0.502321	0.042848	0.039852
										0.028462	0.040488										0.06799	0.096171	0.086957	0.315498
										0.095168	0.035427										0.04306	0.03864	0.10082	0.069742
										0.161875	0.208769										0.155244	0.042075	0.108381	0.084686
										0.080938	0.051876										0.039661	0.065259	0.097039	0.327121
										0.045361	0.055672										0.069123	0.298817	0.057971	0.089668
										0.090721	0.127792										0.210769	0.067835	0.093258	0.302214
										0.040024	0.108813										0.057792	0.170016	0.147449	0.836899
										0.12452	0.09363										0.056658	0.454236	0.354129	0.076384
										0.057813	0.174607										0.063457	0.134811	0.055451	0.046494
										0.055144	0.078446										0.04646	0.182038	0.113422	0.059779
										0.048029	0.035427										0.049859	0.472268	0.056711	0.119557
										0.032019	0.04555										0.122382	0.058389	0.298678	0.312177
										0.052476	0.037958										0.070256	1.24507	0.202899	0.039852
										0.032909	0.09363										0.100852	0.289371	0.074354	0.101291
										0.042692	0.097425										0.038528	0.132235	0.065533	0.068081
										0.121851	0.041754										0.109917	0.048944	0.056711	0.19428
										0.045361	0.040488										0.049859	0.054096	0.099559	0.152767
										0.03024	0.041754										0.038528	0.075563	0.149969	0.179336
										0.17077	0.105017										0.069123	0.052379	0.245748	0.124539
										0.035577	0.148036										0.081588	0.074704	0.056711	0.12952
										0.265049	0.14171										0.320687	0.534951	0.216762	0.054797
										0.028462	0.044284										0.523524	0.066976	0.066793	0.038192
										0.052476	0.167015										0.04306	0.193201	0.093258	0.116236
										0.101394	0.146771										0.098586	0.467116	0.118463	0.068081
										0.162765	0.086038										0.073656	0.379532	0.374293	0.038192
										0.042692	0.075916										0.037395	0.091878	0.127285	0.054797
										0.04625	0.089834										0.048726	0.493735	0.057971	0.038192
										0.032019	0.04555										0.044194	0.274774	0.05041	0.074723
										0.073822	0.110078										0.040794	0.162288	0.045369	0.076384
										0.042692	0.103752										0.052126	0.078998	0.759928	0.076384
										0.059591	0.068324										0.095186	0.22583	0.074354	0.073063
										0.058702	0.050611										0.07139	0.297958	0.147449	0.051476
										0.26238	0.027836										0.115583	0.059248	0.124764	0.260701
										0.40202	0.106282										0.060058	0.075563	0.045369	0.043173
										0.034688	0.030366										0.107651	0.136528	0.098299	0.048155
										0.03024	0.277093										0.075922	0.253307	0.086957	0.076384
										0.052476	0.239135										0.074789	0.144256	0.05041	0.325461
										0.032019	0.125261										0.190372	0.054955	0.085697	0.078044
										0.04625	0.217626										0.180174	0.223254	0.339006	0.073063
										0.042692	0.060733										0.072523	0.075563	0.073094	0.358671
										0.078269	0.078446										0.116716	0.047227	0.148709	0.068081
										0.121851	0.167015										0.075922	0.044651	0.068053	0.044834
										0.064928	0.04555										0.039661	0.343468	0.114682	0.076384
										0.055144	0.103752										0.038528	0.060107	0.161311	0.131181
										0.040914	0.056937										0.037395	0.049803	0.090738	0.088007
										0.682189	0.099956										0.06799	0.1288	0.113422	0.048155
										0.079159	0.115139										0.54732	0.046368	0.113422	0.0631
										0.035577	0.077181										0.107651	0.063542	0.060492	0.215867
										0.202789	0.032897										0.063457	0.041216	0.044109	0.074723
										0.054255	0.09363										0.048726	0.156278	0.044109	0.044834
										0.056034	0.07212										0.038528	0.244721	0.045369	0.350369
										0.378006	0.174607										0.056658	0.209515	0.044109	0.076384
										0.548775	0.032897										0.117849	0.075563	0.04915	0.066421
										1.01661	0.053141										0.545054	0.218102	0.230625	0.066421
										0.03024	0.091099										0.040794	0.041216	0.293637	0.076384
										0.042692	0.034162										0.045327	0.041808	0.209201	0.061439
										0.12452	0.064528										0.069123	0.055504	0.117203	0.117897
										0.370001	0.029101										0.130314	0.065596	0.054191	0.101291
										0.165433	0.04555										0.055525	0.138399	0.064272	0.109594
										0.060481	0.027836										0.201704	0.052621	0.068053	0.102952
										0.086274	0.098691										0.470265	0.045412	0.066793	0.038192
										0.029351	0.050611										0.345616	0.148491	0.05167	0.088007
										0.076491	0.082242										0.186973	0.047575	0.275994	0.398524
										0.391347	0.039223										0.346749	0.041087	0.044109	0.144465
										0.284616	0.102486										0.145046	0.057666	0.330184	0.277306
										0.082717	0.032897										0.064591	0.064875	0.045369	0.880073
										0.199231	0.061304										0.040794	0.282565	0.078135	0.043173
										0.034688	0.054782										0.216435	0.234991	0.066793	0.481549
										0.137861	0.041739										0.132581	0.152095	0.057971	0.117897
										0.78892	0.142174										0.419272	0.09587	0.086957	0.038192
										0.584352	0.100435										0.039661	0.045412	0.110902	0.056457
										0.445602	0.105652										0.483863	0.195345	0.081916	0.16107
										0.606588	0.092608										0.064591	0.366902	0.061752	0.121218
										0.072933	0.062609										0.219835	0.061991	0.10082	0.091328
										0.13875	0.104348										0.050993	0.656676	0.069313	0.079705
										0.055144	0.092608										0.072523	0.0519	0.045369	0.136162
										0.03024	0.09913										0.188106	0.056225	0.057971	0.053136
										0.051587	0.091304										0.241365	0.047575	0.108381	0.117897
										0.442044	0.066522										0.039661	0.287611	0.074354	0.099631
										0.072043	0.078261										0.06799	0.162187	0.115943	0.09631
										0.029351	0.028696										0.04306	0.084337	0.085697	0.114576
										0.052476	0.080869										0.218701	0.196066	0.055451	0.056457
										0.156539	0.125217										0.050993	0.06055	0.086957	0.058118
										0.368222	0.070435										0.155244	0.11317	0.089477	0.056457
										0.997045	0.329999										0.088387	0.049737	0.059232	0.073063
										0.205457	0.065217										0.054392	0.064154	0.209201	0.111255
										0.159207	0.166956										1.30994	0.080733	0.064272	0.069742
										0.166322	0.083478										0.299156	0.074245	0.15375	0.076384
										0.109399	0.191739										0.083854	0.834	0.039068	0.081365
										0.042692	0.09913										0.200571	0.320048	0.084436	0.536346
										0.126298	0.082174										0.830612	0.113891	0.243227	0.066421
										0.059591	0.079565										0.317287	0.041808	0.123504	0.066421
										0.193005	0.097826										0.04306	0.401502	0.055451	0.111255
										0.122741	0.152608										0.698031	0.141283	0.060492	0.048155
										0.115625	0.122608										0.077055	1.29461	0.04915	0.124539
										0.033798	0.103043										0.066857	0.227782	0.042848	0.081365
										0.111178	0.095217										0.038528	0.789309	0.040328	0.112915
										1.44976	0.130434										0.047593	1.15982	0.107121	0.171033
										0.076491	0.105652										0.138247	0.193182	0.046629	0.038192
										0.048918	0.09913										0.421538	0.07785	0.081916	0.0631
										0.063149	0.118695										0.103118	0.263824	0.079395	0.044834
										0.068486	0.208695										0.471398	0.118216	0.260871	0.089668
										0.040024	0.100435										0.564318	0.039646	0.047889	0.078044
										0.12452	0.104348										0.075922	0.063433	0.284815	0.071402
										0.127188	0.19826										0.06799	0.066316	0.076875	0.111255
										0.03113	0.118695										0.173375	0.072083	0.037807	0.09631
										0.0925	0.080869										0.050993	0.291936	0.046629	0.051476
										0.090721	0.053478										0.106518	0.26022	0.234406	0.038192
										0.151202	0.092608										0.072523	0.465656	0.098299	0.039852
										0.219688	0.084782										0.048726	0.245082	0.05041	0.180996
										0.034688	0.146087										0.072523	0.050458	0.144928	0.073063
										0.029351	0.063913										0.148445	0.061991	0.108381	0.222509
										0.105842	0.061304										0.106518	0.459169	0.228104	0.101291
										0.499857	0.134347										1.06744	0.103079	0.090738	0.139483
										0.09339	0.116087										1.59663	0.234991	0.107121	0.171033
										0.176996	0.09913										0.091787	0.072083	0.088217	0.059779
										0.070265	0.109565										0.167709	0.549993	0.042848	0.09631
										0.0925	0.172173										0.047593	0.064875	0.093258	0.094649
										0.081827	0.237391										0.065724	0.188857	0.076875	0.122878
										0.070265	0.092608										0.387543	0.572339	0.128545	0.0631
										0.118294	0.046956										0.080455	0.296261	0.120984	0.091328
										0.060481	0.048261										0.104251	0.066316	0.273473	0.088007
										0.052476	0.097826										0.347883	0.202553	0.05167	0.099631
										0.157428	0.176086										0.037395	0.146329	0.443606	0.126199
										0.082717	0.091304										0.039661	1.47193	0.10082	0.12786
										0.110289	0.063913										0.130314	1.09926	0.086957	0.061439
										0.115625	0.193043										0.037395	0.142004	0.05167	0.061439
										0.034688	0.136956										0.052126	0.09587	0.109641	0.038192
										0.152092	0.09										0.585848	0.044691	0.059232	0.048155
										0.063149	0.087391										0.528056	0.075687	0.068053	0.048155
										0.206347	0.165652										0.060058	0.27752	0.088217	0.0631
										0.10851	0.181304										1.08671	0.049737	0.05293	0.111255
										0.03113	0.066522										0.100852	0.054783	0.147449	0.044834
										0.039135	0.135652										0.274227	0.121099	0.05167	0.066421
										0.07738	0.109565										0.505393	0.07857	0.068053	0.10723
										0.033798	0.062609										0.380744	0.043971	0.047889	0.365942
										0.036466	0.056087										0.037395	1.38183	0.05293	0.068082
										0.040024	0.082174										0.118983	0.117495	0.05293	0.037445
										0.069375	0.037826										0.607378	0.102358	0.085697	0.081699
										0.128967	0.110869										0.050993	0.048296	0.037807	0.062976
										0.042692	0.070435										0.098586	1.46833	0.095779	0.129356
										0.06226	0.080869										0.101985	0.11245	0.139887	0.042551
										0.037356	0.06										0.162043	0.093708	0.10334	0.054466
										0.06226	0.054782										0.134847	0.037483	0.047889	0.04936
										0.04625	0.070435										0.049859	1.17495	0.042848	0.042551
										0.088053	0.074348										0.105385	2.06374	0.093258	0.081699
										0.064928	0.09										0.158644	0.056225	0.037807	0.047658
										0.038245	0.199565										0.04646	0.0865	0.114682	0.042551
										0.035577	0.048261										0.08952	0.056225	0.064272	0.052764
										0.106731	0.146087										0.08952	0.066316	0.091998	0.098719
										0.03024	0.035217										0.220968	0.107404	0.115943	0.059572
										0.214351	0.140869										0.090653	0.132633	0.059232	0.056168
										0.037356	0.087391										0.146179	0.172999	0.058553	0.102123
										0.064928	0.076956										0.047593	0.053341	0.057252	0.086805
										0.048029	0.09										0.130314	0.134795	0.06636	0.110634
										0.163654	0.09										0.037395	0.858508	0.173057	0.081699
										0.028462	0.031304										0.081588	1.14251	0.068963	0.052764
										0.067596	0.086087										0.072523	0.110287	0.05465	0.498702
										0.192116	0.179999										0.184706	0.040366	0.122311	0.212757
										0.084495	0.131739										1.05271	0.058387	0.320091	0.076593
										0.087164	0.284347										0.045327	0.123983	0.114504	0.061274
										0.066707	0.03										0.205103	0.082175	0.084577	0.071486
										0.04625	0.114782										0.056658	0.561526	0.04424	0.068082
										0.066707	0.079565										0.054392	0.0865	0.059854	0.05787
										0.097837	0.062609										0.040794	0.085058	0.045541	0.163397
										0.114736	0.153913										0.688966	0.049737	0.080673	0.040849
										0.26238	0.182608										0.146179	0.04325	0.114504	0.047658
										0.0925	0.075652										0.090653	0.047575	0.052047	0.204247
										0.298847	0.116087										0.060058	0.054062	0.124913	0.073188
										0.09339	0.093913										0.179041	0.126145	0.046843	0.068082
										0.06137	0.117391										0.122382	0.092266	0.05465	0.073188
										0.043582	0.065217										0.055525	0.131912	0.048144	0.04936
										0.057813	0.058695										0.249297	0.169395	0.055951	0.056168
										0.048029	0.061304										0.037395	0.848417	0.05465	0.175312
										0.048918	0.048261										0.088387	0.064154	0.078071	0.137867
										0.052603	0.086087										0.077055	0.158583	0.063758	0.064678
										0.084441	0.032609										1.26801	0.048296	0.041638	0.04936
										0.059524	0.220434										0.129181	0.073525	0.055951	0.153185
										0.05814	0.172173										0.142779	0.102358	0.389053	0.039147
										0.148119	0.196956										0.095186	0.155699	0.039035	0.090209
										0.361298	0.054782										0.065724	0.170837	0.070264	0.045956
										0.214564	0.088695										0.186973	0.037483	0.080673	0.517425
										0.196569	0.123913										0.112184	0.077129	0.050746	0.04936
										0.07752	0.103043										0.063457	0.046133	0.107998	0.595719
										0.156424	0.032609										0.044194	0.072804	0.058553	0.114038
										0.031839	0.283043										0.060058	0.142724	0.104095	0.04936
										0.191031	0.178695										0.052126	0.046133	0.167852	0.515723
										0.65892	0.044348										0.380744	0.083616	0.052047	0.037445
										0.027686	0.173478										0.050993	0.056225	0.050746	0.086805
										0.037376	0.037826										0.073656	0.114612	0.131419	0.558274
										0.159193	0.036522										0.04306	0.046854	0.080673	0.07489
										0.037376	0.063913										0.044194	0.045412	0.261537	0.037445
										0.37791	0.057391										0.100852	0.204716	0.07677	0.108932
										0.127354	0.067826										0.055525	0.049624	0.05465	0.044253
										0.675531	0.093913										0.239098	0.085233	0.053348	0.093613
										0.496958	0.236086										0.065724	0.07652	0.096287	0.054466
										0.095516	0.133043										0.045327	0.06061	0.204285	0.110634
										1.12681	0.03913										0.130314	0.073111	0.186069	0.316582
										0.03876	0.182608										0.077055	0.317444	0.07677	0.205949
										0.35853	0.050869										0.091787	0.170465	0.037734	0.253606
										0.0969	0.108261										0.048726	0.088642	0.041638	0.202545
										0.160577	0.139565										0.044194	0.30608	0.071565	0.148079
										1.00084	0.096521										0.070256	0.521244	0.046843	0.141271
										0.192416	0.070435										0.123515	0.227287	0.067661	0.037445
										0.874868	0.165652										0.038528	0.228044	0.05465	0.12425
										0.394521	0.06913										0.04646	0.530715	0.055951	0.039147
										0.1938	0.181304										0.044194	0.040912	0.039035	0.051062
										0.11628	0.286956										0.079322	0.065534	0.117106	0.153185
										0.524644	0.046956										0.052126	0.060231	0.379945	0.086805
										0.131507	0.032609										0.050993	0.181072	0.092384	1.17952
										0.867947	0.196956										0.08952	0.306837	0.046843	0.114038
										0.141197	0.216521										0.049859	0.976576	0.080673	0.095315
										0.383447	0.058695										0.045327	0.128038	0.340909	0.054466
										0.23256	0.083478										0.037573	0.048488	0.084577	0.093613
										0.394521	0.075652										0.051962	0.298882	0.079372	0.188928
										0.274089	0.135652										0.131904	0.590946	0.05465	0.05787
										0.06783	0.063913										0.051962	0.103037	0.055951	0.056168
										0.052603	0.315651										0.055959	0.13372	0.083276	0.548062
										1.19602	0.187826										0.179869	0.042806	0.037734	0.098719
										0.369604	0.194347										0.171076	0.064398	0.104095	0.073188
										0.098284	0.028696										0.051962	0.282215	0.081974	0.05787
										0.776584	0.036522										0.055959	0.576172	0.097589	0.284243
										0.250556	0.03										0.043968	0.167056	0.050746	0.054466
										0.085826	0.121304										0.106323	0.093945	0.158744	0.444237
										0.059524	0.054782										0.277399	0.043942	0.070264	0.158291
										0.037376	0.223043										0.132704	0.068186	0.052047	0.134462
										0.143966	0.048261										0.132704	0.353431	0.104095	0.328497
										0.127354	0.03913										0.1383	0.049245	0.166551	0.047658
										0.0969	0.058695										0.079143	0.114401	0.075469	0.628059
										0.035991	0.224347										0.185465	0.060989	0.117106	0.194034
										0.037376	0.117391										0.533213	0.05114	0.062457	0.056168
										0.037376	0.061304										0.101526	0.123114	0.092384	0.10723
										0.055371	0.033913										0.457268	0.074247	0.227707	0.837411
										0.25194	0.043043										0.143096	0.142433	0.046843	0.069784
										0.178573	0.040435										0.05516	0.142054	0.040337	0.078295
										0.037376	0.073043										0.052762	0.053034	0.139226	0.548062
										0.1938	0.104348										0.085538	0.154176	0.083276	0.07489
										0.095516	0.053478										0.279797	0.047351	0.063758	0.209353
										0.117664	0.054782										0.334157	0.142054	0.178262	0.296158
										0.03876	0.307825										0.09593	0.042806	0.058553	0.088507
										0.055371	0.343042										0.097529	0.253046	0.055951	0.047658
										0.082754	0.200869										0.037573	0.926573	0.04424	0.17361
										0.040316	0.088695										0.102326	0.061367	0.04424	0.047658
										0.03395	0.043043										0.039971	0.090915	0.195177	0.07489
										0.038194	0.09										0.051163	0.119326	0.153539	0.078295
										0.072145	0.054782										0.39971	0.037502	0.173057	0.093613
										0.21113	0.058695										0.037573	0.099249	0.061156	0.217863
										0.037133	0.160434										0.090334	0.03826	0.062457	0.047658
										0.079571	0.100435										0.260611	1.62851	0.230309	0.093613
										0.054109	0.140869										0.048765	0.800428	0.080673	0.069784
										0.094425	0.157826										0.70189	0.542837	0.087179	0.068082
										0.12201	0.065217										0.320567	0.079172	0.04424	0.236586
										0.083815	0.239999										0.071948	0.448891	0.04424	0.149781
										0.060474	0.050869										0.045567	2.27666	0.199081	0.291052
										0.105034	0.073043										0.139898	0.07955	0.137925	0.287647
										0.237653	0.027391										0.184666	0.17198	0.083276	0.071486
										0.042438	0.033913										0.629943	0.182208	0.081974	0.11574
										0.063657	0.143478										0.1375	0.476924	0.053348	0.202545
										0.030768	0.070435										0.060756	0.08296	0.065059	0.045956
										0.06684	0.036522										0.831396	2.01869	0.039035	0.486788
										0.171874	0.483912										0.039172	1.15613	0.291465	0.11574
										0.086998	0.200869										0.291788	1.10045	0.124913	0.076593
										0.060474	0.346955										0.439681	0.352673	0.503557	0.221267
										0.06684	0.289564										0.773838	0.059095	0.075469	0.11574
										0.194154	0.130434										1.26628	1.1781	0.118408	0.816987
										0.611109	0.296086										0.084738	0.600416	0.065059	0.471469
										0.091242	0.061304										0.20625	0.088996	0.048144	0.079997
										0.049865	0.164347										0.103925	0.06039	0.104095	0.260415
										0.213252	0.063913										0.108721	0.040684	0.085878	0.091911
										0.517745	0.122608										0.104724	0.14748	0.09889	0.229778
										0.237653	0.046956										0.559594	0.071197	0.135323	0.079997
										0.650364	0.028696										0.753053	0.393491	0.091083	0.037445
										0.131558	0.058695										0.037573	0.113152	0.149636	0.04936
										0.103973	0.053478										0.117515	0.526349	0.048144	0.045956
										0.304494	0.062609										1.74433	0.161465	0.072866	0.042551
										0.049865	0.03913										0.037573	0.168457	0.037734	0.120846
										0.160204	0.18913										0.17907	0.497108	0.248526	0.144675
										0.287518	0.067826										0.04077	0.050219	0.08848	0.565082
										0.136863	0.160434										0.150291	0.379506	0.067661	0.088507
										0.067901	0.224347										0.05516	0.212955	0.055951	0.061274
										0.70129	0.136956										0.057558	0.326743	0.048144	0.07489
										0.368151	0.165652										0.054361	0.48948	0.052047	0.083401
										0.395735	0.028696										0.539608	1.52565	0.040337	0.07489
										0.045621	0.174782										0.051163	0.062933	0.113203	0.05787
										0.428625	0.032609										0.084738	0.038777	0.132721	0.04936
										0.09973	0.049565										0.063154	0.038141	0.513967	0.076593
										0.420137	0.122608										0.525219	0.06929	0.150937	0.175312
										0.151716	0.041739										0.051962	0.096625	0.182165	0.148079
										0.080632	0.078261										0.179869	0.116967	0.091083	0.536148
										0.396796	0.035217										0.271003	0.113152	0.123612	0.114038
										0.074267	0.09										0.198256	0.315937	0.078071	0.148079
										0.123071	0.134347										0.051962	0.119509	0.061156	0.491894
										0.062596	0.182608										0.116715	0.057848	0.072866	0.389771
										0.270543	0.092608										0.045567	0.043227	0.154841	0.102123
										0.123071	0.299999										0.072747	0.141123	0.106697	0.117442
										0.95698	0.108261										0.047166	0.056576	0.048144	0.090209
										0.607926	0.063913										0.055017	0.109338	0.057252	0.047658
										0.056231	0.09913										0.155176	0.07374	0.087179	0.187226
										0.120949	0.259564										0.138248	0.876613	0.307079	0.134462
										0.158082	0.166956										0.069124	0.040684	0.150937	0.226373
										0.729936	0.404347										0.039499	0.640137	0.158744	0.262117
										0.157021	0.054782										0.056428	0.07819	0.045541	0.054466
										0.198398	0.035217										0.064892	0.09281	0.041638	0.051062
										0.305554	0.104348										0.190443	0.057848	0.227707	0.056168
										0.053048	0.112174										0.052196	0.059119	0.083276	0.159993
										0.074267	0.208695										0.077588	1.23705	0.291465	0.103825
										0.086998	0.395216										0.129784	0.562584	0.132721	0.11574
										0.845579	0.103043										0.069124	0.134766	0.059854	0.313178
										0.558061	0.032609										0.06207	0.345178	0.083276	0.05787
										0.625962	0.451303										0.039499	0.096625	0.093685	0.040849
										0.16657	0.183913										0.063481	0.082639	0.070264	0.127654
										0.058352	0.105652										0.064892	0.052762	0.079372	0.939535
										0.332078	0.463042										0.368191	0.153201	0.074167	0.561678
										0.297067	0.113478										0.252514	2.5739	0.294067	0.079997
										0.131558	0.041739										0.126962	0.106796	0.162648	0.061274
										0.197337	0.494346										0.14248	0.542877	0.039035	0.233182
										0.231288	0.09										0.093106	0.525714	0.055951	0.258712
										0.794654	0.092608										0.049374	0.047677	0.041638	0.301264
										0.159143	0.070435										0.155176	0.422097	0.075469	0.100421
										0.12201	0.140869										0.191854	0.068654	0.059854	0.06638
										0.084876	0.84391										0.115677	0.076918	0.115805	0.064678
										0.393614	0.659998										0.078999	0.562584	0.04424	0.052764
										0.029707	0.096521										0.236996	0.463416	0.070264	0.131058
										0.03289	0.259564										0.637633	0.03687	0.248526	0.301264
										0.074267	0.316956										0.055017	0.051491	0.062457	0.103825
										0.073206	0.232173										0.052196	0.050855	0.257634	0.100421
										0.350114	0.057391										0.186211	0.111881	0.042939	0.040849
										0.354358	0.078261										0.043731	0.038777	0.137925	0.042551
										0.074267	0.131739										0.681364	1.27074	0.045541	0.149781
										0.028646	0.376955										0.105802	0.067383	0.284959	0.047658
										0.038194	0.146087										0.077588	0.350264	0.230309	0.114038
										0.265238	0.58565										0.063481	0.044498	0.053348	0.061274
										0.179301	0.101739										0.115677	0.076918	0.061156	0.047658
										0.05517	0.06913										0.251103	0.099167	0.053348	0.042551
										0.091242	0.088695										0.112855	0.053398	0.050746	0.052764
										0.067901	0.225652										0.045142	0.04132	0.096287	0.052764
										0.054109	0.067826										0.087463	0.197063	0.083276	0.350623
										0.088059	0.22826										0.205961	0.072468	0.057252	0.044253
										0.058352	0.166956										0.084641	0.165279	0.042939	0.284243
										0.046682	0.340434										0.046553	0.073104	0.040337	0.042551
										0.242958	0.373042										0.179158	0.041955	0.08848	0.039147
										0.323591	0.225652										0.125552	0.049584	0.117106	0.054466
										0.037133	0.103043										0.050785	1.22751	0.058553	0.037445
										0.120949	0.028696										0.440136	0.336914	0.05465	0.079997
										0.100791	0.105652										0.064892	0.038141	0.067661	0.056168
										0.172935	0.046956										0.190443	0.080732	0.084577	0.100421
										0.248263	0.232173										0.112855	0.095989	0.046843	0.05787
										0.092303	0.096521										0.153765	0.317208	0.059854	0.272329
										0.350114	0.28826										0.084641	0.140487	0.079372	0.037445
										0.063657	0.075652										0.191854	0.523171	0.045541	0.045956
										0.157021	0.305216										0.128373	0.092175	0.202984	0.045956
										0.07745	0.048261										0.138248	0.099167	0.067661	0.05787
										0.028646	0.237391										0.06207	0.643316	0.260236	0.039147
										0.3342	0.100435										0.059249	0.216134	0.355222	0.061274
										0.04456	0.106956										0.165051	0.055305	0.063758	0.078295
										0.075328	0.093913										0.045142	0.055305	0.06636	0.114038
										0.08912	0.405651										0.067713	0.049584	0.055951	0.12425
										0.148533	0.037826										0.61224	0.148751	0.124913	0.037445
										0.373455	0.033913										0.191854	0.310851	0.04424	0.039147
										0.366029	0.033913										0.661614	0.216134	0.05465	0.037906
										0.42332	0.035217										0.253925	0.210413	0.317488	0.10257
										0.054109	0.063913										0.320227	0.193249	0.057252	0.134902
										0.14429	0.037826										1.01005	0.200242	0.260236	0.075813
										0.13368	0.349564										0.110034	1.23959	0.092384	0.15497
										0.05517	0.076956										0.310352	0.075647	0.085878	0.10257
										0.094425	0.44739										0.155176	0.088996	0.107998	0.062434
										0.028646	0.033913										0.369601	0.162736	0.150937	0.071353
										0.181423	0.03										0.197497	0.296866	0.041638	0.238587
										0.054109	0.046956										0.173515	0.421461	0.037734	0.092536
										0.081693	0.050869										0.18339	0.062297	0.055951	0.094766
										0.04456	0.036522										0.091695	0.233933	0.145732	0.199566
										0.042438	0.273912										0.152355	0.053398	0.065059	0.042366
										0.05517	0.121304										0.049374	0.663022	0.048144	0.045711
										0.17824	0.083478										0.200318	0.195792	0.247224	0.147166
										0.073206	0.191739										0.095927	0.090268	0.081974	0.042366
										0.127314	0.032609										0.248282	0.294323	0.113203	0.066893
										0.183545	0.032609										0.170694	0.061662	0.06636	0.05017
										0.206886	0.259564										0.073356	0.094717	0.053348	0.065779
										0.540025	0.176086										0.229943	0.116288	0.04424	0.101455
										0.071084	0.113478										0.167872	0.044867	0.037734	0.273148
										0.152777	0.134347										0.136837	0.172142	0.037734	0.083617
										0.046682	0.112174										0.172104	0.264165	0.05465	0.074698
										0.158082	0.113478										0.554402	0.064553	0.065059	0.214059
										0.109278	0.101739										0.050785	0.068216	0.097589	0.123753
										0.048804	0.06										0.187622	0.042578	0.152238	0.187302
										0.168692	0.033913										0.053606	0.120866	0.092384	0.168349
										0.100791	0.109565										0.57133	0.08424	0.167852	0.061319
										0.038194	0.267391										0.06066	0.180841	0.057252	0.056859
										0.045621	0.108261										0.26521	0.116288	0.061156	0.139361
										0.067901	0.035217										0.626347	0.762279	0.063758	0.15274
										0.075328	0.076956										0.255335	0.070047	0.119709	0.179498
										0.073206	0.048261										0.097338	0.348405	0.063758	0.046825
										0.041377	0.071739										0.073356	0.048072	0.169154	0.070238
										0.039255	0.121304										0.118498	0.058144	0.145732	0.162774
										0.061535	0.03913										0.207372	0.51368	0.078071	0.051285
										0.08912	0.078261										0.411922	0.084698	0.111902	0.066893
										0.128375	0.03										0.155176	0.064553	0.048144	0.222978
										0.073206	0.142174										0.064892	0.040289	0.037734	0.071353
										0.075328	0.206086										0.074767	0.076457	0.071565	0.072468
										0.074033	0.311738										0.251103	0.064553	0.072866	0.064664
										0.100609	0.067826										0.134016	2.00482	0.084577	0.376833
										0.037965	0.097826										0.038089	0.830953	0.046843	0.214059
										0.048406	0.131739										0.049374	0.041204	0.068963	0.05463
										0.105354	0.049565										0.111445	0.041662	0.163949	0.10703
										0.036067	0.071739										0.568509	0.553511	0.050746	0.066893
										0.075931	0.070407										0.043731	0.504981	0.068963	0.036791
										0.081626	0.118648										0.526188	0.395103	0.122311	0.070238
										0.077829	0.031292										0.042321	0.22113	0.053348	0.15497
										0.079727	0.054761										0.047964	0.996685	0.178262	0.081387
										0.029423	0.075622										1.66179	0.194118	0.039035	0.230783
										0.028474	0.136902										0.091695	0.038457	0.1106	0.04794
										0.046508	0.076926										0.520545	0.650112	0.068963	0.060204
										0.029423	0.035203										0.086052	0.042578	0.041638	0.046825
										0.045559	0.067799										0.404869	0.043951	0.048144	0.071353
										0.059796	0.074318										0.208782	0.437223	0.039035	0.066893
										0.027525	0.069103										0.074767	0.312237	0.041638	1.12604
										0.048406	0.091268										0.094516	0.770978	0.04424	0.238587
										0.1101	0.135598										0.038089	0.955939	0.119709	0.096996
										0.085422	0.135598										0.217247	0.085613	0.053348	0.176153
										0.308469	0.160371										0.052196	0.286141	0.040337	0.168349
										0.105354	0.226866										0.088874	0.054939	0.048144	0.041251
										0.048406	0.129079										0.442957	0.993938	0.042939	0.040136
										0.037016	0.086053										0.046553	0.160697	0.039035	0.051285
										0.040813	0.127775										0.038089	1.20179	0.04424	0.051285
										0.027525	0.056065										0.198908	0.06318	0.048144	0.108144
										0.056948	0.196878										0.108623	0.039831	0.053348	0.043481
										0.061694	0.190359										0.131194	0.079662	0.048144	0.041251
										0.105354	0.065191										0.066303	0.143757	0.100191	0.128213
										0.154709	0.071711										0.084641	0.667509	0.154841	0.101455
										0.035118	0.084749										0.088874	0.053108	0.102793	0.128213
										0.09871	0.050849										0.119909	0.782423	0.068963	0.085847
										0.130032	0.028684										0.111445	0.108962	0.132721	0.069123
										0.244877	0.174713										0.063481	0.092481	0.042939	0.051285
										0.319859	0.083445										0.143326	0.539318	0.094986	0.159429
										0.072134	0.073014										0.078792	0.117203	0.07677	0.05017
										0.044609	0.3064										0.081043	0.095685	0.067661	0.065779
										0.528669	0.151244										0.060032	0.901	0.160045	0.161659
										0.602702	0.106914										0.048776	0.04212	0.041638	0.297676
										0.04366	0.08866										0.068286	0.075999	0.042939	0.719105
										0.03322	0.029988										0.0938	0.054939	0.075469	0.044596
										0.109151	0.108218										0.349686	0.103011	0.037734	0.140476
										0.046508	0.037811										0.107307	0.066867	0.107998	0.040136
										0.059796	0.076926										0.088547	0.311778	0.14313	0.062434
										0.201217	0.048242										0.316669	0.037864	0.101492	0.486093
										0.210708	0.148637										0.053278	0.0572	0.048144	0.036791
										0.653006	0.049546										0.059282	0.080563	0.100191	0.039021
										0.1101	0.082141										0.097552	0.101509	0.089781	0.039021
										0.369214	0.063888										0.072038	0.076535	0.065059	0.037906
										0.239182	0.02738										0.072038	0.039476	0.041638	0.068008
										0.130981	0.204701										0.048776	0.053977	0.091083	0.083617
										0.405281	0.040419										0.230373	0.037864	0.045541	0.239702
										0.099659	0.071711										0.044274	0.037864	0.089781	0.075813
										0.061694	0.113433										0.092299	0.07734	0.04424	0.10257
										0.048406	0.103003										0.061533	0.08298	0.045541	0.04794
										0.055999	0.050849										0.048776	0.050754	0.079372	0.036791
										0.070236	0.04433										0.123066	0.047532	0.188671	0.15274
										0.034169	0.086053										0.045024	0.056394	0.050746	0.073583
										0.130032	0.419833										0.03827	0.179655	0.136624	0.064664
										0.522025	0.058672										0.240128	0.061228	0.046843	0.191761
										0.052203	0.083445										0.03677	0.380256	0.061156	0.555216
										0.28569	0.071711										0.070538	0.490627	0.039035	0.113719
										0.530567	0.045634										0.078792	0.161931	0.037734	0.044596
										0.094914	0.029988										0.039021	1.4171	0.091083	0.136017
										0.029423	0.079534										0.066035	0.585691	0.201683	0.129327
										0.107252	0.075622										0.103555	0.368977	0.055951	0.056859
										0.075931	0.040419										0.062283	0.062839	0.360427	0.04794
										0.034169	0.093876										0.043523	0.062839	0.087179	0.055745
										0.053152	0.140814										0.053278	0.22477	0.115805	0.069123
										0.074033	0.067799										0.289654	0.12165	0.05465	0.331123
										0.130981	0.045634										0.195104	0.245716	0.093685	0.185072
										0.279046	0.16689										0.072038	0.132123	0.085878	0.037906
										0.041762	0.036507										0.05628	0.061228	0.049445	0.049055
										0.379655	0.089964										0.624332	0.139374	0.063758	0.064664
										0.063592	0.09518										0.445737	0.287609	0.037734	0.049055
										0.031322	0.057368										0.081794	0.309361	0.08848	0.089191
										0.678633	0.113433										0.144827	0.041087	0.045541	0.095881
										0.586566	0.067799										0.040522	0.037059	0.046843	0.711301
										0.073084	0.290754										0.107307	0.10312	0.048144	0.066893
										0.4945	0.031292										0.065285	0.120038	0.055951	0.916441
										0.042711	0.148637										0.053278	0.215908	0.072866	0.443727
										0.157557	0.147333										0.073539	0.164348	0.037734	0.133787
										0.042711	0.170802										0.114811	0.08298	0.065059	0.225208
										0.195522	0.083445										0.585311	0.432622	0.049445	0.256425
										0.093015	0.086053										0.073539	0.093453	0.068963	0.192876
										0.12149	0.325957										0.109558	0.148235	0.058553	0.053515
										0.139523	0.161675										0.1876	0.626778	0.037734	0.151625
										0.07688	0.147333										0.100554	0.076535	0.091083	0.182842
										0.073084	0.199486										0.123816	0.123261	0.085878	0.092536
										0.385349	0.119952										0.07579	0.146624	0.079372	0.432578
										0.288538	0.129079										0.078792	0.113593	0.140528	0.04794
										0.483111	0.162979										0.084045	0.060422	0.068963	0.826134
										0.081626	0.052153										0.067536	0.186905	0.07677	0.119293
										0.524873	0.169498										0.598068	1.35909	0.084577	0.064664
										0.108202	0.196878										0.046525	0.063645	0.037734	0.258655
										0.149964	0.207309										0.048776	0.046726	0.093685	0.134902
										0.13193	0.097787										0.066786	0.825768	0.149636	0.05463
										0.404332	0.202094										0.041272	0.159514	0.067661	0.125983
										1.16554	0.110826										0.052528	0.304527	0.037734	0.439267
										0.578024	0.07823										0.105056	0.178044	0.1106	0.172808
										0.054101	0.074318										0.07579	0.693645	0.049445	0.042366
										0.060745	0.058672										0.057781	0.082174	0.160045	0.137132
										0.087321	0.058672										0.523028	1.19233	0.057252	0.068008
										0.649209	0.232082										0.071288	0.045921	0.229008	0.344501
										0.081626	0.031292										0.039771	0.701701	0.046843	0.180612
										0.072134	0.185144										0.068286	0.214297	0.039035	0.10257
										0.056948	0.103003										0.07504	0.177238	0.05465	0.10034
										0.072134	0.109522										0.05628	0.227187	0.080673	0.1048
										0.128133	0.052153										0.165088	1.27531	0.045541	0.080272
										0.341689	0.045634										0.043523	0.179655	0.041638	0.189532
										0.279046	0.276412										0.126067	0.066867	0.041638	0.042366
										0.817207	0.040419										0.117813	0.045115	0.184768	0.225208
										0.229691	0.035203										0.272395	0.244911	0.085878	0.062434
										0.390095	0.132991										0.054779	0.248939	0.070264	0.039021
										0.129083	0.037811										0.072038	0.344003	0.049445	0.056859
										0.071185	0.039115										0.107307	0.046726	0.089781	0.05463
										0.058846	0.043026										0.044274	0.049949	0.152238	0.183957
										0.030372	0.031292										0.360192	0.066867	0.118408	0.109259
										0.068338	0.243816										0.061533	0.076535	0.128817	0.148281
										0.091117	0.050849										0.048026	1.00059	0.04424	0.078042
										0.154709	0.084749										0.072789	0.132928	0.059854	0.063549
										0.089219	0.116041										0.069037	0.08298	0.055951	0.070238
										0.334096	0.053457										0.414971	0.120038	0.058553	0.247506
										0.030372	0.288146										0.481006	0.045921	0.039035	0.198451
										0.078778	0.311615										0.195104	0.056394	0.05465	0.042366
										0.423315	0.035203										0.195854	0.043504	0.049445	0.049055
										0.067389	0.207309										0.459995	0.070895	0.093685	0.074698
										0.105354	0.217739										0.092299	0.161125	0.132721	0.070238
										0.064541	0.063888										0.078042	0.918415	0.049445	0.188417
										0.044609	0.045634										0.479505	0.084591	0.091083	0.342272
										0.045559	0.035203										0.202608	0.202212	0.08848	0.179498
										0.793478	0.130383										0.041272	1.08921	0.07677	0.140476
										0.069287	0.138206										0.084795	0.041893	0.096287	0.316629
										0.170845	0.168194										0.13057	0.215908	0.071565	0.036791
										0.077829	0.028684										0.060032	0.041087	0.073719	0.616535
										0.031322	0.233385										0.118563	0.046726	0.038703	0.089191
										0.053152	0.147333										0.411219	0.062033	0.17324	0.045711
										0.492602	0.104306										0.051778	0.074118	0.066347	0.076927
										0.037016	0.062584										0.054029	0.945806	0.103207	0.472714
										0.036067	0.050849										1.05281	0.095064	0.046075	0.214059
										0.047457	0.311615										0.782666	0.066867	0.130852	0.042366
										0.057897	0.204701										0.065285	0.03867	0.099521	0.051285
										0.048406	0.037811										0.042773	0.055588	0.044232	0.325548
										0.027525	0.036507										0.330176	0.053977	0.060818	0.175038
										0.067389	0.056065										0.170341	0.037864	0.138224	0.062434
										0.037965	0.043026										0.153832	0.045115	0.088463	0.080272
										0.031322	0.045634										0.096051	0.080563	0.106893	0.049055
										0.03322	0.079534										1.24116	0.062033	0.116108	0.056859
										0.162302	0.161675										0.03677	0.079757	0.112422	0.313284
										0.04366	0.265981										0.095301	0.136957	0.250646	0.049055
										0.030372	0.104306										0.066035	0.042698	0.042389	0.196221
										0.163252	0.162979										0.081794	0.102315	0.064504	0.086962
										0.032271	0.155156										0.181597	0.039476	0.117951	0.148281
										0.034169	0.104306										0.282901	0.068478	0.130852	0.084732
										0.031322	0.103003										0.051778	0.062839	0.06819	0.096996
										0.037016	0.202094										0.589063	0.040281	0.151125	0.138247
										0.072134	0.646699										0.155333	0.066061	0.049761	0.049055
										0.060745	0.053457										0.979271	0.123525	0.187984	0.040136
										0.090168	0.152548										0.345934	0.414994	0.05529	0.060204
										0.041762	0.032596										0.296408	0.638312	0.092149	0.556331
										0.194573	0.073014										0.087797	0.476452	0.241431	0.131557
										0.036067	0.096483										0.054029	0.072411	0.071876	0.049055
										0.036067	0.170802										0.527531	0.357795	0.05529	0.055745
										0.080677	0.045634										0.891474	0.040161	0.121637	0.040136
										0.354977	0.07823										0.201107	0.051114	0.075562	0.218519
										0.122439	0.093876										0.521528	0.702204	0.112422	0.585318
										0.058846	0.084749										0.643843	0.293295	0.092149	0.334467
										0.086371	0.324653										0.170341	0.057807	0.062661	0.042366
										0.077829	0.203397										0.068286	0.043203	0.093992	0.04794
										0.388197	0.312919										0.053278	0.06085	0.05529	0.287642
										0.428061	0.413314										0.164337	0.139346	0.193513	0.071353
										0.047457	0.389845										0.106557	0.069977	0.110579	0.0524
										0.104405	0.058672										0.058531	0.055373	0.10505	0.078042
										0.231589	0.410706										0.121565	0.079713	0.073719	0.088076
										0.128133	0.046938										0.07504	0.059633	0.044232	0.042366
										0.243928	0.268589										0.043523	0.058416	0.152968	0.055745
										0.059796	0.204701										0.095301	0.047463	0.103207	0.233012
										0.096812	0.058672										1.52706	0.048071	0.101364	0.266459
										0.036067	0.036507										0.043523	0.422296	0.040546	0.263114
										0.06549	0.093876										0.041272	0.057199	0.08662	0.05463
										0.032271	0.147333										0.046525	0.076062	0.06819	0.334467
										0.030372	0.08866										0.073539	0.105878	0.116108	0.416969
										0.286639	0.263373										0.083294	0.194719	0.049761	0.086962
										0.079727	0.04433										0.331677	0.265913	0.046075	0.139361
										0.093965	0.052153										0.077291	0.069977	0.195356	0.070238
										0.067389	0.126471										0.058531	0.057199	0.053447	0.063549
										0.055999	0.050849										0.048776	0.30729	0.047918	0.043481
										0.082575	0.282931										0.03827	0.222101	0.06819	0.060204
										0.050304	0.574989										0.047275	0.100402	0.044232	0.096996
										0.172743	0.065191										0.03677	0.061458	0.038703	0.089191
										0.028474	0.07823										0.110309	0.365706	0.042389	0.068008
										0.142371	0.136902										0.081043	0.739322	0.057132	0.489437
										0.087321	0.237297										0.061533	1.54254	0.092149	0.063549
										0.038856	0.192967										0.326424	1.05757	0.31515	0.045711
										0.110091	0.046938										0.109558	0.090666	0.070033	0.138247
										0.145709	0.0339										0.03827	0.196544	0.047918	0.186187
										0.028062	0.073014										0.509521	0.047463	0.134538	0.2096
										0.037776	0.436783										0.03752	0.067543	0.062661	0.121523
										0.033459	0.112129										0.081043	0.156992	0.101364	0.037906
										0.107932	0.059976										0.039021	0.063284	0.071876	0.080272
										0.036697	0.263373										0.142576	0.037727	0.03686	0.101455
										0.106853	0.254247										0.138824	0.146039	0.145596	0.063549
										0.098218	0.397668										0.05703	0.063892	0.044232	0.057974
										0.064759	0.198182										0.045774	0.037118	0.05529	0.256425
										0.100377	0.071711										0.047275	0.249483	0.129009	0.1572
										0.092822	0.075622										0.108808	0.041986	0.057132	0.051285
										0.088505	0.151244										0.072038	0.452721	0.119794	0.233012
										0.072315	0.032596										0.13132	0.097968	0.081091	0.045711
										0.247165	0.185144										0.108058	0.083364	0.090306	0.138247
										0.037776	0.065191										0.039021	0.063892	0.10505	0.044596
										0.199675	0.049546										0.092299	0.083364	0.193513	0.044596
										0.533186	0.715802										0.053278	0.062067	0.130852	0.044596
										0.084187	0.168194										0.201857	0.10101	0.040546	0.049055
										0.077711	0.103003										0.237877	0.038335	0.05529	0.138247
										0.124122	0.168194										0.05703	0.121699	0.252489	0.148281
										0.140312	0.208613										0.041272	0.113789	0.05529	0.088076
										0.101456	0.568469										0.145578	0.059024	0.038703	0.082502
										0.194278	0.20079										0.168089	0.039552	0.129009	0.186187
										0.119805	0.135598										0.095301	0.233662	0.082934	0.471599
										0.041014	0.082141										0.058531	0.140563	0.040546	0.066893
										0.028062	0.040419										0.22587	0.083364	0.051604	0.199566
										0.161899	0.325957										0.127568	0.052331	0.184298	0.142706
										0.060442	0.04433										0.042773	0.408909	0.132695	0.163889
										0.154343	0.264677										0.084045	0.045637	0.134538	0.306595
										0.083108	0.050849										0.067536	0.046246	0.199042	0.044596
										0.056125	0.305096										0.091549	0.053548	0.06819	0.10257
										0.044252	0.084749										0.048776	0.14178	0.03686	0.188417
										0.042094	0.453733										0.066035	0.062675	0.195356	0.063549
										0.046411	0.06128										0.05553	0.507485	0.10505	0.083617
										0.046411	0.305096										0.084795	0.057807	0.304092	0.162774
										0.135995	0.187751										0.091549	0.052331	0.156654	0.40582
										0.04857	0.050849										0.165838	0.81295	0.03686	0.153855
										0.330273	0.089964										0.069787	0.101619	0.193513	0.279838
										0.043173	0.140814										0.059282	0.061458	0.044232	0.042366
										0.028062	0.035203										0.15083	0.090057	0.154811	0.112604
										0.033459	0.131687										0.044274	1.15127	0.103207	0.598697
										0.237451	0.229474										0.03677	0.160643	0.252489	0.1048
										0.118726	0.37811										0.045024	0.073628	0.541837	0.144936
										0.170533	0.104306										0.052528	0.055373	0.044232	0.122638
										0.070156	0.049546										0.046525	0.058416	0.062661	0.15497
										0.073394	0.035203										0.07504	0.059633	0.060818	0.068008
										0.035618	0.448517										0.060032	1.29184	0.259861	0.085847
										0.036697	0.661041										0.043523	0.108312	0.047918	0.141591
										0.088505	0.12256										0.05553	0.13752	0.38887	0.537378
										0.245007	0.282931										0.05628	0.982112	0.073719	0.204025
										0.092822	0.07823										0.063034	0.679081	0.202728	0.056859
										0.030221	0.082141										0.064534	0.061458	0.14191	0.168349
										0.0313	0.08866										0.045024	0.652307	0.05529	0.251965
										0.448999	0.123864										0.171091	0.091883	0.195356	0.093651
										0.437126	0.255551										0.083294	0.185591	0.130852	0.055745
										0.573121	0.070407										0.0938	0.054156	0.066347	0.063549
										0.774954	0.066495										0.05703	0.103444	0.152968	0.260885
										0.753368	0.391149										0.05703	0.076062	0.060818	0.276493
										0.194278	0.089964										0.087797	0.116831	0.125323	0.066893
										0.167295	0.213828										0.096051	0.528783	0.182455	0.143821
										0.268752	0.066495										0.090798	0.115006	0.044232	0.05017
										0.103615	0.036507										0.060032	0.073019	0.06819	0.039021
										0.186723	0.619319										0.03827	0.037118	0.049761	0.35788
										0.196437	0.028684										0.049526	0.119265	0.261704	0.173923
										0.392874	0.340299										0.03827	0.101619	0.097678	0.142706
										0.09606	0.303792										0.03827	0.101844	0.042389	0.063549
										0.364811	0.118648										0.048026	0.061509	0.152968	0.149395
										0.071235	0.074318										0.117813	0.045376	0.281976	0.045711
										0.113329	0.374199										0.285152	0.065543	0.202728	0.162774
										0.180247	0.393756										0.072038	0.087727	0.278291	0.115949
										0.045332	0.219043										0.200357	0.049409	0.182455	0.0524
										0.2558	0.070407										0.420915	0.037309	0.416514	0.084732
										0.515917	0.08866										0.074797	0.058484	0.092149	0.211829
										0.067997	0.048242										0.038132	0.07361	0.294877	0.334467
										0.036697	0.108218										0.178926	0.086718	0.339109	0.241931
										0.259038	0.143421										0.133461	0.381157	0.256175	0.073583
										0.360494	0.10561										0.067464	0.042351	0.165869	0.04794
										0.084187	0.13951										0.048398	0.190579	0.151125	0.039021
										0.034538	0.136902										0.299187	0.049409	0.044232	0.380178
										0.074473	0.06128										0.063064	0.062518	0.132695	0.062434
										0.09606	0.299881										0.039598	0.286372	0.046075	0.1048
										0.113329	0.923111										0.043998	0.141169	0.121637	0.046825
										0.034538	0.311615										0.042532	0.046384	0.164026	0.127098
										0.0313	0.032596										0.058664	0.243013	0.344638	0.130442
										0.066918	0.029988										0.039598	0.493084	0.309621	0.049055
										0.198596	0.069103										0.127595	0.093777	0.162183	0.348961
										0.930377	0.083445										0.118795	0.086718	0.051604	0.065779
										0.650832	0.052153										0.098262	0.150244	0.060818	0.245276
										0.983264	0.074318										0.039598	0.053443	0.24696	0.535148
										0.072315	0.031292										0.63064	0.066551	0.164026	0.169464
										0.067997	0.307704										0.252256	0.292422	0.10505	0.045711
										0.03238	0.062584										0.061597	0.037309	0.066347	0.147166
										0.072315	0.119952										0.14666	0.112935	0.053447	0.313284
										0.137074	0.404187										0.083596	0.142178	0.167712	0.30994
										0.059363	0.126471										0.058664	0.326706	0.149282	0.073583
										0.091743	0.121256										0.31092	0.506193	0.136381	0.171693
										0.041014	0.348122										0.218524	0.052434	0.106893	0.219634
										0.110091	0.059976										0.064531	0.435608	0.062661	0.043481
										0.069077	0.080837										0.7729	0.054451	0.29672	0.036791
										0.38316	0.10561										0.048398	0.247046	0.219315	0.041251
										0.100377	0.292058										0.038132	0.045376	0.097678	0.084732
										0.092822	0.199486										0.733302	1.06684	0.053447	0.092536
										0.165137	0.035203										0.052798	0.529385	0.171397	0.15051
										0.086346	0.215132										0.038132	0.06756	0.038703	0.036791
										0.250403	0.136902										0.196525	0.042351	0.200885	0.039021
										0.587152	0.057368										0.325586	0.049409	0.066347	0.15497
										0.106853	0.151244										0.064531	0.326706	0.071876	0.0601
										0.050728	0.032596										0.070397	1.10011	0.092149	0.063534
										0.056125	0.138206										0.14666	0.212762	0.060818	0.291915
										0.03238	0.159067										0.218524	1.16263	0.042389	0.179442
										0.04749	0.080837										0.736235	0.370065	0.202728	0.058383
										0.138153	0.048242										0.134928	0.051426	0.50682	0.067827
										1.10955	0.114737										0.215591	0.06756	0.047918	0.04808
										0.030221	0.148637										0.894629	0.041342	0.058975	0.067827
										0.125202	0.056065										0.095329	0.078651	0.05529	0.038636
										0.072315	0.036507										0.074797	0.09781	0.042389	0.045504
										0.133836	0.106914										0.061597	0.416449	0.47549	0.05409
										0.036697	0.073014										0.07333	0.108902	0.040546	0.056666
										0.057204	0.357249										0.109995	0.105877	0.06819	0.326258
										0.026983	0.048242										0.32412	1.43287	0.423886	0.05409
										0.055046	0.059976										0.061597	0.071593	0.14191	0.042929
										0.034538	0.082141										0.042532	0.232929	0.167712	0.065252
										0.120884	0.08866										0.912228	0.132094	0.108736	0.129645
										0.067997	0.035203										0.222924	0.36099	0.285662	0.078989
										0.039935	0.100395										0.344652	0.037309	0.230373	0.099594
										0.044252	0.045634										0.070397	0.099827	0.24696	0.046363
										0.067997	0.029988										0.046931	0.637278	0.042389	0.255855
										0.234213	0.155156										0.101196	0.051426	0.071876	0.068686
										0.061521	0.169183										0.060131	0.123019	0.151125	0.121917
										0.099298	0.112084										0.476646	0.102852	0.138224	0.039494
										0.142471	0.067673										0.483979	0.116969	0.049761	0.04207
										0.089584	0.04864										0.299187	0.054451	0.03686	0.046363
										0.249324	0.403924										0.190659	0.382165	0.044232	0.267016
										0.161899	0.156494										0.058664	0.068568	0.186141	0.158836
										0.124122	0.095165										0.133461	0.194612	0.158497	0.160553
										0.051808	0.109969										0.379851	0.096802	0.127166	0.446458
										0.097139	0.099395										0.789033	0.316623	0.108736	0.08414
										0.041014	0.063444										0.657039	0.175453	0.051604	0.066969
										0.029142	0.126887										0.058664	0.060501	0.060818	0.098736
										0.077711	0.054984										0.067464	0.049409	0.073719	0.046363
										0.077711	0.19456										0.133461	0.063526	0.276448	0.067827
										0.041014	0.086706										0.048398	0.045376	0.070033	0.236108
										0.059363	0.162838										0.058664	0.860124	0.046075	0.050656
										0.089584	0.114198										0.038132	0.345865	0.079248	0.060959
										0.0313	0.183986										0.47518	0.118986	0.110579	0.09616
										0.036697	0.054984										0.085063	0.751222	0.184298	0.057524
										0.091743	0.124772										0.060131	0.312589	0.221158	0.095302
										0.042094	0.09728										0.252256	0.07966	0.294877	0.103029
										0.043173	0.120543										0.171593	0.059493	0.064504	0.099594
[truncated: 9,670 more rows]
