# Supplementary material for: Capping protein regulates endosomal trafficking by controlling F-actin density around endocytic vesicles and recruiting RAB5 effectors
Source: eLife. 2021 Nov 19;10:e65910. doi: 10.7554/eLife.65910 (PMC8654373; doi:10.7554/eLife.65910)
Supplement: Figure 3—source data 1. [file elife-65910-fig3-data1.xlsx]

## Sheet: Sheet1
Figure 3A			Figure 3B	size				Number					Figure 3D			Figure 3F			Figure 3C
mCherry/EGFP	mCherry-CapZb/GFP-CapZa1		mCherry/EGFP	mCherry-CapZb/GFP-CapZa1				mCherry/EGFP	mCherry-CapZb/GFP-CapZa1				WT	CapZb KO		WT	CapZb KO		Scramble	CapZβ KO
28.927	12.992		0.047346	0.051826				118	81				Manders M1			36.9	33.3		17.7	50.1
23.264	9.497		0.019935	0.086752				206	92				0.373	0.569		42.2	33.7		18.5	42.3
26.902	11.881		0.024919	0.166744				206	83				0.409	0.509		41.9	37.2		16.1	51.1
25.582	13.791		0.0922	0.083372				177	172				0.315	0.356		51.8	37.2		15.7	54.4
27.108	9.183		0.346374	0.113791				176	93				0.261	0.453		45.3	29		12.9	58
23.047	8.362		0.043608	0.055206				203	115				0.325	0.351		44.4	32.7		19.6	48
31.507	8.967		0.153252	0.031546				246	141				0.332	0.375		50.8	37.2		16.4	42.6
30.123	5.792		0.573136	0.125058				156	113				0.319	0.48		38.8	31		15.8	53.7
34.128	5.135		0.140792	0.258002				134	192				0.293	0.42					17.3	44.8
28.993	17.218		0.114627	0.138578				206	233				0.262	0.529					18.6	52.3
27.57	10.852		0.023673	0.065346				161	116				0.303	0.382					14.2	48.1
33.85	17.338		0.027411	0.330108				175	153				0.359	0.4					19.1	49.6
35.478	16.4		0.054822	0.108158				174	119				0.313	0.516					14.5	52
35.455	15.439		0.181908	0.068726				141	80				0.272	0.428					12.4	47.7
33.502	14.403		0.032395	0.241103				219	112				0.3	0.412					16.7	49.4
30.072	17.084		0.033641	0.050699				199	78				0.298	0.44
30.86	12.41		0.226763	0.039433				187	112				0.279	0.36
19.779	10.732		0.022427	0.429253				204	69				0.375	0.488
27.11	14.869		0.049838	0.238849				281	152				0.33	0.327
29.436	14.862		0.226763	0.269269				134	93				0.323	0.407
35.39			0.080987	0.113791				228	73				0.359	0.453
			0.109643	0.107032				216	120				0.302	0.463
			0.077249	0.476572				253					0.364	0.434
			0.026165	0.114918				183					0.342	0.392
			0.656614	0.076612									0.321	0.593
			0.022427	0.025913									0.348	0.371
			0.027411	0.098018										0.392
			0.018689	0.045066										0.497
			0.037378	0.022533
			0.021181	0.030419									Pearson's
			0.044854	0.072105									WT	CapZb KO
			0.142038	0.089005									0.2	0.36
			0.134562	0.237723									0.26	0.34
			0.760028	0.337994									0.17	0.2
			0.093446	0.065346									0.1	0.3
			0.021181	0.065346									0.15	0.16
			0.022427	0.030419									0.15	0.25
			0.047346	0.189277									0.14	0.33
			0.031149	0.510371									0.19	0.27
			0.094692	0.167871									0.15	0.33
			0.640417	0.324475									0.21	0.25
			0.079741	0.342501									0.2	0.26
			0.094692	0.331234									0.13	0.31
			0.049838	0.148717									0.15	0.28
			0.143284	0.132944									0.15	0.25
			0.068527	0.223076									0.18	0.3
			0.034887	0.260256									0.16	0.19
			0.023673	0.315461									0.24	0.33
			0.245452	0.645569									0.18	0.2
			0.281584	0.40672									0.2	0.24
			0.019935	0.272649									0.2	0.26
			0.163219	0.031546									0.15	0.28
			0.022427	0.398833									0.21	0.26
			0.102168	0.954271									0.21	0.24
			0.031149	0.107032									0.22	0.39
			0.199352	0.300815									0.2	0.22
			0.018689	0.873152										0.28
			0.205581	0.021406										0.31
			0.287814	0.58473
			0.112135	0.139704
			0.100922	0.032673
			0.130825	0.412353
			0.267879	0.135198
			0.038624	0.520511
			0.153252	0.039433
			0.137054	0.087879
			0.0461	0.726688
			0.079741	0.309828
			0.041116	0.104778
			0.038624	0.22533
			0.231746	0.114918
			0.204335	0.219696
			0.287814	0.063092
			0.063543	0.067599
			0.198106	0.163364
			0.181908	0.155477
			0.533266	0.070979
			0.417393	0.084499
			0.180662	0.028166
			0.117119	0.245609
			0.032395	0.098018
			0.147022	0.069544
			0.019935	0.097019
			0.214303	0.036919
			0.561922	0.037777
			0.082233	0.073837
			0.129579	0.036919
			0.120857	0.1803
			0.022427	0.09616
			0.793669	0.066969
			0.049838	0.042929
			0.023673	0.148533
			0.391228	0.019747
			0.198106	0.098736
			0.228008	0.104746
			0.199352	0.101312
			0.296536	0.261006
			0.034887	0.142523
			0.443557	0.047222
			0.287814	0.461912
			0.028657	0.043787
			0.044854	0.01803
			0.133316	0.24641
			0.247944	0.026616
			0.062297	0.285905
			0.066035	0.151967
			0.028657	0.04207
			0.10466	0.453327
			0.067281	0.03606
			0.024919	0.497114
			0.033641	0.040353
			0.041116	0.363176
			0.232992	0.018889
			0.056068	0.130503
			0.044854	0.024899
			0.021181	0.230956
			0.026165	0.641354
			0.149514	0.442165
			0.054125	0.302218
			0.228015	0.159695
			0.07946	0.157977
			0.117463	0.12621
			0.026487	0.052373
			0.092127	0.182017
			0.029941	0.412115
			0.084066	0.296208
			0.049519	0.059242
			0.062186	0.233532
			0.12322	1.53427
			0.104795	0.394944
			0.027638	0.352873
			0.023032	0.117624
			0.034548	0.362318
			0.081763	0.046363
			0.135888	0.382065
			0.07255	0.046363
			0.054125	0.053232
			0.048367	0.160553
			0.087521	0.472215
			0.188861	0.359742
			0.097885	0.033484
			0.02879	0.137372
			0.188861	0.05409
			0.034548	0.095302
			0.066792	0.248128
			0.034548	0.097019
			0.203832	0.155402
			0.02188	0.880037
			0.020729	0.339136
			0.13013	0.081564
			0.104795	0.416408
			0.292505	0.22237
			0.047215	0.129645
			0.056428	0.546052
			0.055276	1.32564
			0.046064	0.416408
			0.020729	0.309086
			0.099037	0.021464
			0.149707	0.278178
			0.127827	0.451609
			0.102492	0.121059
			0.048367	0.060959
			0.109401	0.421559
			0.082915	0.04207
			0.046064	0.6259
			0.046064	0.036919
			0.148556	0.348581
			0.031093	0.170856
			0.179649	0.116766
			0.038003	0.033484
			0.226864	0.037777
			0.023032	0.022323
			0.139343	0.060959
			0.247593	0.65389
			0.092127	2.68379
			0.185407	0.018953
			0.089824	0.026535
			0.117463	0.073918
			0.02188	0.018953
			0.254502	0.462461
			0.171587	0.022744
			0.073702	0.176266
			0.153162	0.034116
			0.219954	0.147836
			0.196922	0.278614
			0.027638	0.073918
			0.085218	0.371485
			0.099037	0.102348
			0.046064	0.617879
			0.039154	0.098557
			0.018425	0.553437
			0.033396	0.411287
			0.112856	0.162999
			0.066792	0.19901
			0.031093	0.494682
			0.018425	0.629251
			0.100189	0.117511
			0.143949	0.261556
			0.039154	0.02843
			0.185407	0.536379
			0.105947	0.293777
			0.143949	0.360113
			0.029941	0.45488
			0.118614	0.024639
			0.132433	0.058755
			0.118614	0.451089
			0.018425	0.043593
			0.017274	0.185743
			0.168133	0.020849
			0.252199	0.066337
			0.156617	0.17058
			0.02188	0.424555
			0.087521	0.276719
			0.211893	0.377171
			0.024183	0.066337
			0.07255	0.686111
			0.094431	0.079604
			0.031093	0.045488
			0.05758	0.096662
			0.396148	0.070127
			0.048367	0.090976
			0.102492	1.56744
			0.286747	0.020849
			0.058731	0.403706
			0.191164	0.089081
			0.104795	0.164894
			0.214196	0.42645
			0.1808	0.149731
			0.023032	0.022744
			0.510156	1.93703
			0.017274	0.066337
			0.359297	0.155417
			0.295959	0.390439
			0.974248	0.024639
			0.23838	0.214173
			0.299414	0.072023
			0.039154	0.145941
			0.252199	0.062546
			0.323598	0.036011
			0.100189	0.051174
			0.474456	0.221754
			0.02879	0.161103
			0.631073	0.555333
			0.314385	0.02843
			0.090976	0.032221
			0.05067	0.335474
			0.052973	0.073918
			0.381177	0.134569
			0.029941	0.153522
			0.035699	0.094767
			0.247593	0.018953
			0.389238	0.064441
			0.936245	0.153522
			0.185407	0.079604
			0.242986	0.153522
			0.077157	0.017058
			0.442212	0.077186
			0.02879	0.220332
			0.025335	0.028068
			0.086369	0.028068
			0.064489	0.145952
			0.032245	0.089817
			0.199226	0.088413
			0.328204	0.075783
			0.017274	0.067363
			0.02188	0.223139
			0.28214	0.051925
			0.062186	0.113674
			0.141646	0.145952
			0.111705	0.188054
			0.567735	0.129112
			0.34663	0.053329
			0.218803	0.088413
			0.164678	0.037891
			0.1808	0.127708
			0.222257	0.129112
			0.058731	0.058942
			0.307475	0.068766
			0.103643	0.063152
			0.049519	0.039295
			0.071399	0.040698
			0.13013	0.053329
			0.07255	0.136129
			0.093279	0.060346
			0.063338	0.289098
			0.033396	0.023858
			0.024183	0.108061
			0.076005	0.919219
			0.352387	0.089817
			0.052973	0.037891
			0.2165	0.0828
			0.232622	0.140339
			0.085218	0.085607
			0.685198	0.154373
			0.308627	0.370494
			0.358145	0.075783
			0.089824	0.120691
			0.215348	0.196474
			0.116311	0.127708
			0.025335	0.037891
			0.026487	0.070169
			0.219954	0.030875
			0.291353	0.025261
			0.063338	0.028068
			0.278686	0.140339
			0.219954	0.036488
			0.024183	0.032278
			0.092127	0.189457
			0.153162	0.025261
			0.133585	0.345233
			0.065641	0.036488
			0.133585	0.092624
			0.184255	0.42663
			0.327052	0.134725
			0.13013	0.120691
			0.13013	0.029471
			0.035699	0.016841
			0.02188	0.17823
			0.274079	0.09543
			0.025335	0.018244
			0.058731	0.324183
			0.082915	0.056136
			0.214196	0.088413
			0.059883	0.199281
			0.020839	0.138935
			0.050451	0.050522
			0.086644	0.09543
			0.034	0.471538
			0.035096	0.035085
			0.03729	0.103851
			0.084451	0.262434
			0.300513	0.070169
			0.030709	0.057539
			0.110773	0.021051
			0.076773	0.067363
			0.817089	0.108061
			0.431028	0.051925
			0.501221	0.199281
			0.180966	0.119288
			0.121741	0.293308
			0.087741	0.138935
			0.37619	0.103851
			0.059225	0.021051
			0.018645	0.112271
			0.07129	0.028068
			0.032903	0.092624
			0.091031	0.049119
			0.206192	0.067363
			0.067999	0.105254
			0.089935	0.110868
			0.032903	0.032278
			0.144773	0.053329
			0.182063	0.056136
			0.051548	0.17402
			0.143676	0.036488
			0.114063	0.291905
			0.38277	0.885538
			0.083354	0.089817
			0.027419	0.029471
			0.093225	0.025261
			0.048258	0.206298
			0.330126	0.148759
			0.095418	0.286291
			0.059225	0.126305
			0.217159	0.43505
			0.089935	0.464521
			0.039483	0.130515
			0.162321	0.085607
			0.084451	0.077186
			0.036193	0.484169
			0.11187	0.065959
			0.053741	0.16139
			0.076773	0.26103
			0.028516	0.34804
			0.028516	0.404176
			0.036193	0.167003
			0.025226	0.09122
			0.143676	0.049119
			0.038387	0.094027
			0.268707	0.154373
			0.049354	0.09543
			0.15574	0.070169
			0.092128	0.26103
			0.146966	0.029471
			0.021935	0.655382
			0.036193	0.09543
			0.231417	0.064556
			0.038387	0.141742
			0.139289	0.168407
			0.582381	0.35225
			0.251159	0.192264
			0.263223	0.704501
			0.050451	0.035085
			0.03729	0.197878
			0.038387	0.394352
			0.101999	0.390142
			0.041677	0.188054
			0.026322	0.213315
			0.245675	0.283484
			0.168902	0.042102
			0.129418	0.092624
			0.025226	0.140339
			0.043871	0.310149
			0.019742	0.255417
			0.194127	0.063152
			0.446383	0.301728
			0.132708	0.383125
			0.052645	0.044908
			0.017548	0.501009
			0.162321	0.218928
			0.105289	0.088413
			0.096515	0.607667
			0.10858	0.016841
			0.07787	0.113674
			0.035096	0.124902
			0.190837	0.029471
			0.098709	0.136129
			0.312578	0.085607
			0.099805	0.231559
			0.055935	0.329796
			0.129418	0.119288
			0.034	0.282081
			0.140386	0.077186
			0.063612	0.412596
			0.039483	0.070169
			0.046064	0.35646
			0.060322	0.039295
			0.14587	0.454698
			0.129418	0.099035
			0.107483	0.025633
			0.164515	0.209721
			0.058128	0.04544
			0.167805	0.231859
			0.350964	0.106026
			0.085548	0.093209
			0.030709	0.055926
			0.023032	0.037284
			0.137095	0.24118
			0.027419	0.076898
			0.174385	0.078063
			0.096515	0.069907
			0.036193	0.14797
			0.018645	0.075733
			0.039483	0.071072
			0.08116	0.083889
			0.078967	0.109521
			0.458447	0.020972
			0.15574	0.019807
			0.231417	0.125833
			0.055935	0.066412
			0.028516	0.412452
			0.225933	0.107191
			0.047161	0.040779
			0.347674	0.167777
			0.030709	0.165447
			0.076773	0.433424
			0.22374	0.059421
			0.031806	0.283124
			0.171095	0.270307
			0.424447	0.115347
			0.208385	0.336719
			0.135999	0.029128
			0.144773	0.154961
			0.062516	0.081558
			0.020839	0.299435
			0.025226	0.04777
			0.026322	0.420608
			0.057032	0.078063
			0.051548	0.175933
			0.027419	0.466047
			0.206192	0.036119
			0.069096	0.181758
			0.051548	1.02997
			0.182063	0.299435
			0.11845	0.648971
			0.14587	0.116512
			0.049354	0.146805
			0.177676	0.14797
			0.096515	1.14531
			0.083354	0.304096
			0.089935	0.142144
			0.312578	0.421773
			0.239094	0.526634
			0.288449	0.760822
			0.07129	0.165447
			0.020839	0.09554
			0.305997	0.086219
			0.178772	0.314582
			0.058128	0.017477
			0.026322	0.39381
			0.029613	0.421773
			0.229224	0.972874
			0.024129	0.089714
			0.027419	0.262152
			0.084451	0.037284
			0.027419	0.354196
			0.020839	0.060586
			0.26761	0.087384
			0.207288	0.222538
			0.063612	0.039614
			0.094322	0.214382
			0.018645	0.223703
			0.063612	0.299435
			0.050451	0.076898
			0.026322	0.14564
			0.044967	0.019807
			0.172192	0.199235
			0.228127	0.236519
			0.315868	0.068742
			0.019742	0.166612
			0.044967	0.090879
			0.070193	0.108356
			0.447479	0.027963
			0.188643	0.066412
			0.063612	0.023302
			0.065806	0.027963
			0.061419	0.038449
			0.197417	0.201565
			0.072386	0.025633
			0.036193	0.055926
			0.017548	0.24817
			0.116257	0.019822
			0.018645	0.020813
			0.083354	0.075325
			0.10858	0.039645
			0.085548	0.082263
			0.105289	0.047574
			0.07458	0.082263
			0.122838	0.052529
			0.18974	0.025769
			0.054288	0.197232
			0.139031	0.276521
			0.066205	0.024778
			0.055612	0.125872
			0.094012	0.042618
			0.086067	0.032707
			0.02913	0.022796
			0.111225	0.02676
			0.037075	0.016849
			0.056937	0.130827
			0.018537	0.105058
			0.099308	0.040636
			0.068854	0.083254
			0.309841	0.282468
			0.068854	0.276521
			0.031779	0.01784
			0.095336	0.135783
			0.068854	0.06244
			0.17743	0.981204
			0.123142	0.041627
			0.017213	0.078298
			0.064881	0.602598
			0.07415	0.544122
			0.062233	0.324095
			0.031779	0.455913
			0.194644	0.23985
			0.27409	0.131818
			0.041047	0.084245
			0.052964	0.034689
			0.205237	0.280486
			0.248932	0.025769
			0.072826	0.042618
			0.084743	0.136774
			0.07415	0.240841
			0.165513	0.093165
			0.076798	0.14173
			0.312489	0.060458
			0.42239	0.225974
			0.017213	0.573856
			0.018537	0.374642
			0.12579	0.065414
			0.095336	0.24877
			0.101956	0.10704
			0.048992	0.327068
			0.37737	0.437082
			0.09666	0.534211
			0.095336	0.058476
			0.027806	0.392482
			0.076798	0.072351
			0.092687	0.47078
			0.02913	0.5243
			0.030454	0.085236
			0.060909	0.068387
			0.035751	0.344908
			0.153596	0.566918
			0.078122	0.07136
			0.02251	0.616474
			0.064881	0.124881
			0.239663	0.180383
			0.680591	0.037662
			0.203912	0.060458
			0.643516	0.502496
			0.386639	0.029733
			0.19332	0.632332
			0.054288	0.058476
			0.046344	0.025769
			0.165513	1.5838
			0.189347	0.644225
			0.621006	0.432126
			0.031779	1.06743
			0.034427	0.216063
			0.02251	0.046582
			0.021186	0.366713
			0.111225	0.359775
			0.068854	0.813706
			0.332351	0.259672
			0.51905	0.115961
			0.018537	1.10212
			0.223774	0.26661
			0.025158	0.352837
			0.282035	0.051538
			0.062233	0.132809
			0.111225	0.758203
			0.017213	0.144703
			0.030454	0.240841
			0.300572	0.484655
			0.071502	0.047574
			0.505809	0.30229
			0.041047	0.029733
			0.341619	0.203179
			0.381343	0.020813
			0.189347	0.074334
			0.10328	0.185339
			0.762685	0.094156
			0.018537	0.998053
			0.031779	0.15065
			0.144328	0.075325
			0.059585	0.882093
			0.309841	0.031716
			0.04502	0.344908
			0.070178	0.139747
			0.030454	0.226965
			0.034427	0.191285
			0.235691	0.242823
			0.062233	0.162543
			0.042371	0.127854
			0.12579	0.02838
			0.149624	0.08514
			0.048992	0.158274
			0.687211	0.062218
			0.742824	0.026197
			0.066205	0.104788
			0.05164	0.098239
			0.054288	0.097147
			0.042371	0.28271
			0.02251	0.116795
			0.344268	0.08514
			0.709721	0.184471
			0.104604	0.030563
			0.233043	1.1363
			0.082095	0.061126
			0.090039	0.128802
			0.12579	0.017465
			0.088715	0.141901
			0.042371	0.563236
			0.227746	0.094964
			0.307193	0.122253
			0.076798	0.158274
			0.46741	0.053486
			0.079446	0.285984
			0.279386	0.5163
			0.202588	0.020739
			0.034427	0.036021
			0.070178	0.169189
			0.372074	0.02838
			0.190671	0.406054
			0.054288	0.198661
			0.10328	0.090598
			0.758713	0.790277
			0.043696	0.039296
			0.100632	0.037112
			0.336323	0.078591
			0.205237	0.375491
			0.059585	0.021831
			0.068854	0.671299
			0.027806	0.712778
			0.2966	0.732425
			0.117846	0.697496
			0.090039	0.064401
			0.026482	0.079683
			0.214505	0.07095
			0.136383	0.380948
			0.282035	0.030563
			0.030454	0.089507
			0.059585	0.055669
			0.068854	0.979114
			0.107253	0.039296
			0.095336	0.263062
			0.312489	0.057852
			0.033103	0.257604
			0.075474	0.164823
			0.059585	0.414786
			0.041047	0.048028
			0.299248	0.018556
			0.070178	0.118978
			0.150948	0.054577
			0.034427	0.052394
			0.104604	0.342744
			0.039723	0.221583
			0.349564	0.208485
			0.033103	0.160457
			0.097984	0.038204
			0.02251	0.065493
			0.083419	0.046936
			0.117846	0.065493
			0.023834	0.221583
			0.042371	0.365667
			0.05724	0.026197
			0.101991	0.270703
			0.098869	0.388589
			0.041629	0.017465
			0.019774	0.432251
			0.021855	0.04257
			0.168597	0.018556
			0.097828	0.033838
			0.050995	0.222675
			0.095747	0.025105
			0.081176	0.278343
			0.080136	0.16264
			0.116561	0.164823
			0.055158	0.081866
			0.027059	0.48137
			0.058281	0.203027
			0.097828	0.147358
			0.413167	0.128802
			0.202941	0.098239
			0.059321	0.052394
			0.073891	0.284893
			0.066606	0.058943
			0.527647	0.106971
			0.124887	0.050211
			0.329909	0.037112
			0.415249	0.034929
			0.058281	0.103697
			0.297647	0.188837
			0.097828	0.152816
			0.023937	0.33947
			0.122805	0.030563
			0.135294	0.024014
			0.106154	0.039296
			0.126968	0.078591
			0.268507	0.057852
			0.081176	0.031655
			0.232081	0.221583
			0.070769	0.194295
			0.11448	0.089507
			0.185249	0.223766
			0.079095	0.081866
			0.213348	0.149541
			0.212308	0.101513
			0.468326	0.038204
			0.056199	0.025105
			0.033303	0.130985
			0.35905	0.305632
			0.11552	0.025105
			0.092624	0.034929
			0.238326	0.057852
			0.191493	0.222675
			0.024977	0.064401
			0.292443	0.522849
			0.252896	0.032746
			0.564072	0.379857
			0.444389	0.28271
			0.336154	0.144084
			0.41733	0.338378
			0.267466	0.058943
			0.138416	0.511934
			0.165475	0.018556
			0.023937	0.048028
			0.283077	0.097147
			0.453755	0.203027
			0.192534	0.181196
			0.324706	0.045845
			0.085339	0.068767
			0.11448	0.019648
			0.565113	0.033838
			0.017692	0.087323
			0.045792	0.047066
			0.588009	0.074751
			0.23	0.056756
			0.037466	0.027686
			0.048914	0.051219
			0.131131	0.071983
			0.148823	0.204874
			0.451674	0.117664
			0.077014	0.023533
			0.150905	0.083057
			0.031222	0.13566
			0.105113	0.073367
			0.403801	0.083057
			0.233122	0.098284
			0.024977	0.041529
			0.126968	0.121817
			0.047873	0.059524
			0.022896	0.269936
			0.194615	0.045681
			0.46104	0.210411
			0.310136	0.059524
			0.018733	0.063677
			0.24457	0.04845
			0.185249	0.01938
			0.105113	0.01938
			0.314299	0.024917
			0.104072	0.69768
			1.2062	0.11628
			0.265385	0.437434
			0.0281	0.485884
			0.041629	0.042913
			0.044751	0.080289
			0.113439	0.238097
			0.193575	0.098284
			0.225837	0.793195
			0.090543	0.033223
			0.730588	0.202106
			0.05724	0.099669
			0.13009	1.16003
			0.221674	0.040144
			0.128009	0.035991
			0.128009	0.103821
			0.066606	0.178573
			0.576561	0.119049
			0.108235	0.272704
			0.317421	0.236713
			0.027059	0.105206
			0.097828	0.055371
			0.23	0.163346
			0.152986	0.437434
			0.220633	1.286
			0.421493	0.033223
			0.18733	0.03876
			0.11552	0.179957
			0.117602	0.401443
			0.168597	0.101053
			0.169638	0.173036
			0.077014	0.14535
			0.159231	0.114896
			0.044751	0.22287
			0.443348	0.924703
			0.701448	0.07752
			0.110317	0.390368
			0.08638	0.451277
			0.270588	0.0969
			0.020814	0.123201
			0.017692	0.105206
			0.087421	0.182726
			0.053077	0.051219
			0.435022	0.235328
			0.24457	0.139813
			0.113439	0.049834
			0.181086	0.166114
			0.20086	0.400058
			0.37362	0.260246
			0.095747	0.769663
			0.121765	0.127354
			0.022896	0.204874
			0.191493	0.031839
			0.073891	0.033223
			0.105113	0.640924
			0.506832	0.08721
			0.017692	0.05814
			0.208145	0.171651
			0.137376	0.01938
			1.50801	0.092747
			0.157149	0.499727
			0.24457	0.078904
			0.380905	0.168883
			0.047873	0.13566
			0.156109	0.114896
			0.205023	0.02907
			0.059321	0.041529
			0.039547	0.07752
			0.479774	0.127354
			0.110317	0.030454
			0.365294	0.01938
			0.322624	0.123201
			0.058281	0.031839
			0.171719	0.053987
			0.214389	0.02907
			0.024977	0.207643
			0.103032	0.024917
			0.022896	0.109359
			0.0281	0.062293
			0.227918	0.369604
			0.047131	0.080289
			0.022179	0.071983
			0.119213	0.152271
			0.026338	0.044297
			0.123371	0.089979
			0.099806	0.056756
			0.316053	0.674147
			0.403383	0.377849
			0.085944	0.271096
			0.103965	0.016856
			0.077627	0.028093
			0.031883	0.042139
			0.105351	0.424202
			0.234267	0.03933
			0.219019	0.023879
			0.206543	0.144678
			0.34239	0.040735
			0.381204	1.18411
			0.110896	0.074446
			0.309122	0.080065
			0.099806	1.64203
			0.224564	0.030902
			0.052675	0.238789
			0.123371	0.043544
			0.076241	0.355374
			0.224564	0.091302
			0.887165	0.268287
			0.223178	0.150297
			0.037427	0.412965
			0.023565	0.07866
			0.329915	0.243003
			0.307736	0.561857
			0.119213	0.054781
			0.29526	0.022474
			0.026338	0.158725
			0.019407	0.198055
			0.737456	0.074446
			0.137233	0.098325
			0.377045	0.070232
			0.261991	0.115181
			0.773497	0.148892
			0.077627	0.110967
			0.066537	0.016856
			0.182978	0.080065
			0.361797	0.591354
			0.027724	0.11799
			0.045744	0.198055
			0.31328	0.029497
			0.525368	0.035116
			0.126144	0.070232
			0.334073	0.172771
			0.487941	0.13906
			0.091489	0.023879
			0.145551	0.193841
			0.234267	0.154511
			0.130302	0.064614
			0.234267	0.046353
			0.094261	0.068827
			0.278625	0.279524
			0.166344	0.067423
			0.169116	0.047758
			0.446355	0.019665
			0.59052	0.066018
			0.392293	0.032307
			0.12753	0.220529
			0.253674	0.026688
			0.06931	0.134846
			0.103965	0.042139
			0.242584	0.053376
			0.399224	0.148892
			0.063765	0.036521
			0.153868	0.016856
			0.252288	0.422797
			0.141392	0.026688
			0.501803	0.219124
			0.054062	0.056186
			0.110896	0.221933
			0.497644	0.721986
			0.378432	0.134846
			0.121985	1.21782
			0.045744	0.234575
			0.088717	0.022474
			0.112282	0.058995
			0.036041	0.206482
			0.763794	1.65186
			0.476851	0.601187
			0.309122	0.023879
			0.421404	0.051972
			0.137233	0.202268
			0.321597	0.290761
			0.126144	0.112371
			0.217633	0.543596
			0.26615	0.022474
			0.124758	0.224743
			0.024952	0.127822
			0.121985	0.155915
			0.420017	0.380658
			0.018021	0.029497
			0.263377	0.056186
			0.302191	0.116585
			0.112282	0.17558
			0.896869	0.01826
			0.282784	0.129227
			0.054062	0.133441
			0.079013	0.556238
			0.031883	0.09692
			0.170502	1.12933
			0.187136	0.085683
			0.243971	0.234575
			0.142778	0.438248
			0.095648	0.491625
			0.063765	0.155915
			0.05822	0.161534
			0.083172	2.36682
			0.239812	0.434034
			0.037427	0.141869
			0.038813	0.05759
			0.031883	0.025284
			0.155254	0.280928
			0.267536	0.030902
			0.410314	0.085683
			0.651512	0.016856
			0.026338	0.02107
			0.557251	0.650349
			0.134461	0.251431
			0.023565	0.025284
			0.052675	0.598378
			0.275853	0.473364
			0.120599	0.283738
			0.023565	0.452295
			0.034655	0.026688
			0.148323	0.074446
			0.522596	0.101134
			0.346549	0.751484
			0.13862	0.894757
			0.275853	0.398918
			0.403383	0.050567
			0.020793	0.300593
			0.018021	0.132036
			0.034655	1.59146
			0.169116	0.193841
			0.080399	0.25705
			0.447741	0.213506
			0.095648	0.164343
			0.124758	0.023879
			0.181592	0.016856
			0.246743	0.164343
			0.052675	0.698107
			0.300805	0.323068
			0.048517	0.247217
			0.212088	0.032307
			0.199612	0.379253
			0.4117	0.412965
			0.047131	0.318854
			0.018021	0.026688
			0.065151	0.046353
			0.188523	0.026688
			0.022179	0.171366
			0.033269	0.205078
			0.054062	1.10405
			0.095648	0.066018
			0.067924	0.893352
			0.170502	0.570285
			0.031883	0.082874
			0.024952	0.116585
			0.115054	0.264073
			0.206543	0.292166
			0.022179	0.907399
			0.285556	0.210696
			0.21486	0.028093
			0.027724	0.193841
			0.213474	0.025284
			0.019407	0.743056
			0.077627	0.41156
			0.285556	0.616638
			0.152482	0.080065
			0.217633	0.636303
			0.048517	0.352565
			0.073468	0.115181
			0.045744	0.098325
			0.055448	0.161534
			0.108123	0.108157
			0.103965	0.186817
			0.0402	0.095516
			0.243971	0.29357
			0.018021	0.640517
			0.066537	0.219124
			0.09842	0.56888
			0.074855	0.434034
			0.030496	0.158725
			0.067924	0.02107
			0.034655	0.42982
			0.031883	0.264073
			0.306349	0.028093
			0.09842	0.085683
			0.024952	0.161534
			0.023565	0.101134
			0.119213	0.203673
			0.180206	0.176985
			0.06931	0.020991
			0.073468	0.096208
			0.207929	0.091835
			0.024952	0.171426
			0.342272	0.024489
			0.028216	0.166178
			0.277252	0.108453
			0.03435	0.167053
			0.090782	0.03411
			0.14844	0.017492
			0.023309	0.032361
			0.056432	0.166178
			0.100596	0.09271
			0.21346	0.125071
			0.055205	0.038483
			0.185244	0.224778
			0.082194	0.460925
			0.136173	0.049853
			0.062566	0.089211
			0.077287	0.227401
			0.051525	0.365591
			0.061339	0.244019
			0.159481	0.08134
			0.172976	0.077841
			0.120224	0.019242
			0.206099	0.041107
			0.397477	0.683953
			0.017175	0.029737
			0.153347	0.08134
			0.284613	0.028862
			0.07238	1.30668
			0.066246	0.319237
			0.142306	0.1723
			0.10305	0.361218
			0.159481	0.62273
			0.096916	1.42038
			0.191378	0.751299
			0.105503	0.03411
			0.253943	0.423316
			0.028216	0.209034
			0.104276	0.217781
			0.14108	0.140814
			0.388889	0.155682
			0.045391	0.085713
			0.031896	0.02274
			0.263758	0.031486
			0.177883	0.0586
			1.08202	0.468797
			0.388889	0.033236
			0.359446	0.017492
			0.612163	0.836137
			0.052752	0.676082
			0.026989	0.201163
			0.679636	0.021866
			0.051525	0.055101
			0.318963	0.024489
			0.237995	0.615733
			0.052752	0.037609
			0.204872	0.209034
			0.39993	0.02274
			0.596215	0.060349
			0.149667	0.023615
			0.364354	0.283377
			0.117771	0.181921
			0.019628	0.136441
			0.105503	0.329732
			0.158255	0.048104
			0.03435	0.110202
			0.196285	0.078716
			0.063793	0.029737
			0.150894	0.150435
			0.093235	0.289499
			0.172976	0.676082
			0.040484	0.032361
			0.024536	0.397952
			0.169296	0.246643
			0.214686	0.979575
			0.049071	0.21953
			0.105503	0.258013
			0.147214	0.192417
			0.36558	0.0586
			0.184017	0.1723
			0.46863	0.030612
			0.202419	0.120698
			0.126358	0.419818
			0.03435	0.02274
			0.240449	0.320986
			0.426919	0.311365
			0.284613	0.02274
			0.099369	0.10408
			0.041711	0.021866
			0.029443	0.154808
			0.134946	0.027113
			0.109183	0.027113
			0.406064	0.06997
			0.137399	0.205536
			0.060112	0.361218
			0.057659	0.030612
			0.693131	0.063847
			0.121451	0.175799
			0.055205	0.037609
			0.172976	0.159181
			0.163162	0.053352
			0.056432	0.180172
			0.019628	0.260637
			0.223274	1.10027
			0.273572	0.621855
			0.160708	0.320111
			0.122678	0.059474
			0.631792	0.024489
			0.467403	0.097083
			0.041711	0.755672
			0.116544	0.034985
			0.759377	0.125071
			0.164389	1.02943
			0.029443	0.033236
			0.344725	0.155682
			0.11041	0.892113
			0.442867	0.227401
			0.419559	0.42594
			0.462496	0.542265
			0.105503	0.708443
			0.096916	1.0889
			0.084648	0.027988
			0.572906	0.568503
			0.028216	0.017492
			0.203645	0.477543
			0.066246	0.330607
			0.125132	0.121572
			0.018402	0.031486
			0.424466	0.077841
			0.331231	0.234398
			0.298107	0.020116
			0.062566	0.027113
			0.090782	0.034985
			0.344725	0.932346
			0.018402	0.184545
			0.133719	0.02274
			0.253943	0.523898
			0.095689	0.085713
			0.158255	0.062973
			0.158255	0.090086
			0.066246	0.374338
			0.118998	0.09271
			0.157028	0.146936
			0.125132	0.086587
			0.07238	0.018367
			0.28952	0.019242
			0.128812	0.055101
			0.047844	0.019242
			0.480898	0.084838
			0.272345	1.1029
			0.202419	0.232649
			0.246583	0.132068
			0.095689	0.060349
			0.111637	0.147811
			0.482124	0.10408
			0.065019	0.04548
			0.379075	0.035859
			0.467403	0.53002
			0.25517	0.088337
			0.087101	0.021866
			0.047844	0.062973
			0.028216	0.295622
			0.025762	0.131193
			0.022082	0.026239
			0.083421	0.098832
			0.031896	0.031486
			0.022082	0.027988
			0.035577	0.031486
			0.019628	0.35772
			0.099369	0.019242
			0.019628	0.080465
			0.295654	0.093584
			0.123905	0.139065
			0.196285	0.423316
			0.104276	0.169676
			0.363127	0.227401
			0.47231	0.361218
			0.132492	0.239646
			0.284613	0.042856
			0.224501	0.169676
			0.586401	0.080465
			0.067473	0.077841
			0.055205	0.417194
			0.128812	0.106704
			0.055205	0.034985
			0.187697	0.064722
			0.031896	0.860627
			0.017175	0.050728
			0.138626	0.042856
			0.14476	0.652467
			0.234315	0.164429
			0.10673	0.258888
			0.171749	0.062973
			0.029443	0.065597
			0.060112	0.035859
			0.115317	0.076967
			0.114091	0.064722
			0.03435	0.069095
			0.163162	0.067346
			0.383982	0.160056
			0.230635	0.246643
			0.017175	0.020116
			0.079741	0.241395
			0.063793	0.073468
			0.128812	0.067346
			0.022082	0.037609
			0.145987	0.035859
			0.147214	0.057725
			0.056432	0.025364
			0.093235	0.048104
			0.055205	0.041107
			0.046618	0.111077
			0.332457	0.181921
			0.051525	0.188918
			0.093235	0.034985
			0.199965	0.245768
			0.161935	0.356845
			0.077287	0.162679
			0.118998	0.139939
			0.353313	0.446931
			0.436734	0.049853
			0.202419	0.161805
			0.026989	0.125071
			0.224501	0.076092
			0.176656	0.087462
			0.019628	0.043731
			0.18279	0.024489
			0.740975	0.151309
			0.296881	0.046355
			0.025762	0.16093
			0.14108	0.021866
			0.280933	0.077084
			0.025762	0.104063
			0.14844	0.023125
			0.10673	0.056528
			0.383982	0.161876
			0.114091	0.030834
			0.035577	0.041111
			0.063793	0.026979
			0.112864	0.254376
			0.347179	0.032118
			0.036803	0.019271
			0.025762	0.069375
			0.204872	1.18837
			0.155801	0.026979
			0.137399	0.71431
			0.060112	0.316044
			0.031896	0.781116
			0.055525	0.774692
			0.134847	1.14469
			0.125782	1.25647
			0.086121	0.179862
			0.036261	0.206841
			0.027196	0.202987
			0.192639	0.129758
			0.033995	0.147744
			0.098586	0.167015
			0.159777	0.122049
			0.058925	0.017986
			0.126915	0.091216
			0.055525	0.650073
			0.066857	0.481774
			0.159777	0.571705
			0.223234	0.07323
			0.070256	0.625663
			0.044194	0.041111
			0.115583	0.04882
			0.099719	1.23077
			0.048726	0.02441
			0.036261	0.096355
			0.109917	0.105348
			0.251563	0.167015
			0.080455	0.023125
			0.261762	0.150313
			0.105385	0.096355
			0.100852	0.196564
			0.586981	0.017986
			0.156377	0.161876
			0.175641	0.035972
			0.066857	0.100209
			0.035128	0.019271
			0.319553	0.251807
			0.08952	0.07066
			0.047593	0.023125
			0.304822	0.019271
			0.131448	0.398266
			0.169975	0.023125
			0.032862	0.050104
			0.2289	0.033403
			0.143912	0.020556
			0.036261	0.029549
			0.179041	0.033403
			0.249297	0.029549
			0.237965	0.04625
			0.026063	0.023125
			0.315021	0.051389
			0.087254	0.21198
			0.107651	0.152883
			0.083854	0.02441
			0.138247	0.078369
			0.099719	0.029549
			0.063457	0.14389
			0.171108	0.199133
			0.205103	0.037257
			0.146179	0.074514
			0.053259	0.241529
			0.222101	0.71174
			0.061191	0.019271
			0.02493	0.02441
			0.150711	0.043681
			0.235699	0.028264
			0.235699	0.223543
			0.232299	0.059098
			0.087254	0.082223
			0.311621	0.026979
			0.151845	0.128473
			0.018131	0.129758
			0.167709	0.154168
			0.143912	0.167015
			0.072523	0.02184
			0.095186	0.037257
			0.126915	0.086077
			0.174508	0.192709
			0.375079	0.219689
			0.301423	0.020556
			0.13938	0.030834
			0.097452	0.100209
			0.128048	0.310905
			0.072523	0.224828
			0.032862	0.127188
			0.36828	0.033403
			0.08952	0.597399
			0.419272	0.017986
			0.517858	0.123334
			0.095186	0.082223
			0.183573	0.032118
			0.496328	0.037257
			0.179041	0.069375
			0.247031	0.056528
			0.252696	0.064236
			0.40794	0.078369
			0.211902	0.035972
			0.202837	0.176008
			0.219835	0.053959
			0.167709	0.313474
			0.087254	0.086077
			0.048726	0.163161
			0.086121	0.115873
			0.175641	0.071019
			0.192639	0.102168
			0.023797	0.033641
			0.177907	0.051084
			0.34335	0.061051
			0.062324	0.066035
			0.047593	0.051084
			0.081588	0.037378
			0.088387	0.059805
			0.124648	0.051084
			0.075922	0.156989
			0.019264	0.099676
			0.171108	0.241714
			0.47593	0.306503
			0.055525	0.027411
			0.049859	0.271617
			0.02153	0.2766
			0.030596	0.14453
			0.143912	0.176925
			0.232299	0.789931
			0.052126	0.158235
			0.251563	0.216795
			0.083854	0.1383
			0.048726	0.054822
			0.041927	0.022427
			0.078189	0.114627
			0.027196	0.099676
			0.151845	0.080987
			0.118983	0.373784
			0.088387	0.019935
			0.125782	0.19686
			0.06799	0.297782
			0.016998	0.140792
			0.019264	0.158235
			0.13598	0.240468
			0.02493	0.140792
			0.126915	0.112135
			0.205103	0.05233
			0.163176	0.642909
			0.094053	0.023673
			0.06799	0.174433
			0.061191	0.021181
			0.209636	0.361325
			0.086121	0.229254
			0.194905	0.044854
			0.023797	0.297782
			0.048726	0.019935
			0.134847	0.240468
			0.080455	0.028657
			0.050993	0.027411
			0.073656	0.027411
			0.026063	0.140792
			0.183573	0.100922
			0.044194	0.2305
			0.048726	0.023673
			0.032862	0.294044
			0.092733	0.095938
			0.091544	0.154498
			0.047556	0.029903
			0.036856	0.032395
			0.027344	0.022427
			0.121267	0.457263
			0.124833	0.054822
			0.102245	0.043608
			0.091544	0.147022
			0.137911	0.454771
			0.078467	0.079741
			0.048744	0.350111
			0.153367	0.043608
			0.036856	0.305257
			0.148611	0.251681
			0.058256	0.165711
			0.384011	0.061051
			0.186656	0.071019
			0.166445	0.023673
			0.055878	0.338898
			0.070144	0.216795
			0.2354	0.077249
			0.197356	0.204335
			0.020211	0.19686
			0.029722	0.738847
			0.183089	0.852228
			0.039233	0.083478
			0.0856	0.056068
			0.143856	0.042362
			0.046367	0.071019
			0.115322	0.022427
			0.063011	0.0461
			0.155745	0.080987
			0.060633	0.024919
			0.022589	0.036132
			0.205678	0.032395
			0.072522	0.218041
			0.034478	0.110889
			0.328133	0.0922
			0.024967	0.105906
			0.272256	0.05233
			0.4922	0.113381
			0.097489	0.063543
			0.070144	0.269125
			0.036856	0.122103
			0.247289	0.330176
			0.2033	0.252927
			0.145045	0.05233
			1.28281	1.12135
			0.3852	0.259157
			0.324567	0.142038
			0.210433	0.022427
			0.035667	0.591825
			0.243722	0.340144
			0.026156	1.08273
			0.035667	0.19686
			0.071333	0.492149
			0.252045	0.038624
			0.204489	0.0461
			0.130778	0.175679
			0.386389	0.275354
			0.389956	1.57986
			0.120078	0.42113
			0.061822	0.548217
			0.595633	0.031149
			0.103433	0.077249
			0.259178	0.05856
			0.210433	0.061051
			0.029722	0.546971
			0.133156	0.044854
			0.183089	0.206827
			0.065389	0.487166
			0.090356	0.072265
			0.024967	0.37503
			0.337645	0.033641
			0.153367	0.464738
			0.107	0.176925
			0.724033	0.082233
			0.0214	1.19362
			0.186656	0.219287
			0.539756	0.05856
			0.111756	0.042362
			0.193789	0.018689
			0.084411	0.027411
			0.1926	0.017443
			0.355478	0.102168
			0.651511	0.079741
			0.023778	0.05233
			0.043989	0.05856
			0.026156	0.047346
			0.019022	0.056068
			0.036856	0.057314
			0.030911	0.017443
			0.093922	0.068527
			0.020211	0.191876
			0.055878	0.083478
			0.083222	0.289458
			0.078467	0.020529
			0.017833	0.164231
			0.189033	0.2484
			0.266311	0.030793
			0.168822	0.043111
			0.136722	0.022582
			0.024967	0.143702
			0.0963	0.069798
			0.426811	0.039005
			0.090356	0.266876
			0.0642	0.022582
			0.019022	0.061587
			0.126022	0.211448
			0.109378	0.449583
			0.059444	0.172443
			0.211622	0.309987
			0.017833	0.833474
			0.091544	0.619973
			0.136722	0.024635
			0.0749	0.153967
			0.111756	0.069798
			0.189033	0.051322
			0.136722	0.195025
			0.022589	0.022582
			0.092733	0.829368
			0.047556	0.568651
			0.104622	0.279193
			0.250856	0.332568
			0.024967	0.147808
			0.034478	0.172443
			0.047556	0.552228
			0.067767	0.515276
			0.166445	0.630238
			0.1391	1.55609
			0.111756	0.361309
			0.058256	0.718512
			0.049933	0.07801
			0.017553	0.449583
			0.084252	0.593286
			0.018723	0.018476
			0.182546	0.281246
			0.024574	0.472165
			0.063189	0.036952
			0.133399	0.297669
			0.337008	0.291511
			0.222332	1.15167
			0.098294	0.065693
			0.117017	0.899166
			0.045637	0.270982
			0.092443	0.133438
			0.065529	0.158073
			0.050317	0.030793
			0.031595	0.231977
			0.050317	0.552228
			0.018723	0.385944
			0.086592	0.804733
			0.063189	0.030793
			0.045637	0.129332
			0.214141	0.065693
			0.125208	0.045164
			0.188397	0.270982
			0.327647	0.147808
			0.179036	0.188866
			0.106485	0.145755
			0.07021	0.348991
			0.174355	0.133438
			0.053828	0.090327
			0.113506	0.445477
			0.0667	0.026688
			0.287861	0.024635
			0.174355	0.09238
			0.115847	0.020529
			0.734865	0.094433
			0.315945	0.020529
			0.079571	0.098539
			0.253926	0.119068
			0.086592	0.045164
			0.038616	0.445477
			0.506682	0.68156
			0.236374	0.798575
			0.018723	0.533752
			0.885816	0.182707
			0.080742	0.147808
			0.086592	0.293563
			0.018723	0.480377
			0.230523	0.082116
			0.389666	0.203236
			0.334668	0.075957
			0.07138	0.018476
			0.080742	0.361309
			0.038616	0.061587
			0.290201	0.049269
			0.017553	0.02874
			0.024574	0.022582
			0.131059	0.394155
			0.651783	0.041058
			0.025744	0.285352
			0.06904	0.862214
			0.100634	0.139597
			0.084252	0.057481
			0.050317	0.047216
			0.057338	0.303828
			0.087763	0.195025
			0.07021	0.086221
			0.172015	0.44753
			1.42526	0.018476
			0.236374	0.32641
			0.052658	0.242241
			0.191907	0.406472
			0.511363	0.045164
			0.021063	0.145755
			0.183716	0.952541
			0.661144	0.330515
			0.019893	0.030793
			0.227012	0.041058
			0.033935	0.264823
			0.415409	0.297669
			0.177865	0.985388
			0.044466	0.084195
			0.050317	0.16839
			0.030424	0.081899
			0.62955	0.051282
			0.345199	0.026789
			0.095954	0.033678
			0.120527	0.041332
			0.204779	0.049751
			0.500831	0.294682
			0.42009	0.4049
			0.147441	0.033678
			0.063189	0.020666
			0.032765	0.032912
			0.074891	0.026789
			0.017553	0.18829
			0.06787	0.153847
			0.095954	0.422505
			0.307754	0.052048
			0.029254	0.143131
			0.163823	0.099503
			0.022233	0.255646
			0.06787	0.492157
			1.16081	0.089553
			0.092443	0.257942
			0.077231	0.097207
			0.054998	0.212783
			0.060849	0.144662
			0.101805	0.022962
			0.379134	0.190586
			0.168504	0.16839
			0.661144	0.068121
			0.0667	0.02832
			0.036275	0.245696
			0.14276	0.474552
			0.244565	0.106392
			0.70327	0.04669
			0.14159	0.407962
			0.033935	0.084195
			0.108826	0.274781
			0.079571	0.064294
			0.037445	0.494453
			0.07021	0.287793
			0.301903	0.207425
			0.191907	0.120934
			0.166164	0.120169
			0.050317	0.230387
			0.294882	0.368161
			0.065529	0.053578
			0.035105	0.721013
			0.108826	0.334483
			0.051487	0.185228
			0.090103	0.815924
			0.050317	1.11137
			0.019893	0.052048
			0.042126	0.087256
			0.14276	0.518946
			0.125208	0.026789
			0.077231	0.267892
			0.052658	0.107157
			0.298393	0.326063
			0.022233	0.727137
			0.060849	1.03942
			0.018723	0.242634
			0.043296	0.133181
			0.028084	0.385
			0.083082	0.048221
			0.021063	0.039036
			0.065529	0.078072
			0.019893	0.127058
			0.052658	0.401839
			0.019893	0.083429
			0.097124	0.081899
			0.193078	0.022962
			0.036275	0.068121
			0.052658	0.143131
			0.056168	0.179105
			0.503172	0.035209
			0.035105	0.022962
			0.079571	0.166093
			0.053828	0.140835
			0.56168	0.134783
			0.173185	0.071693
			0.056168	0.088899
			0.090103	0.038714
			0.098294	0.124746
			0.079571	0.080296
			0.147441	0.288205
			0.083082	0.021508
			0.245735	0.131915
			0.143931	0.136216
			0.026914	0.058788
			0.086592	0.217946
			0.27967	0.068825
			0.205949	0.131915
			0.045637	0.14482
			0.177865	0.60222
			0.044466	0.017206
			0.040956	0.268131
			0.039786	0.811563
			0.018723	0.146253
			0.029254	0.104672
			0.053828	0.020074
			0.019893	0.045883
			0.039786	0.44593
			0.054998	0.113275
			0.111166	0.01864
			0.07255	0.093201
			0.024574	0.227983
			0.022233	0.028677
			0.018723	0.289639
			0.051487	0.022942
			0.031595	0.329787
			0.06787	0.30111
			0.024574	0.101804
			0.018723	0.187835
			0.07138	0.586448
			0.143931	0.177798
			0.040956	0.177798
			0.06787	0.425856
			0.021063	0.020074
			0.13925	0.017206
			0.077231	0.020074
			0.13691	0.405782
			0.033935	0.098936
			0.021063	0.339824
			0.082733	0.028677
			0.078597	0.900463
			0.113069	0.01864
			0.02482	0.030111
			0.034472	0.020074
			0.135131	0.031545
			0.059292	0.024376
			0.063429	0.08173
			0.386088	0.213645
			0.177876	0.470305
			0.271641	0.562072
			0.04964	0.16346
			0.13651	0.03728
			0.11169	0.534829
			0.11169	0.607956
			0.019304	0.305412
			0.217864	0.233719
			0.019304	1.33492
			0.04964	0.021508
			1.38164	0.139084
			0.612226	0.017206
			0.030336	0.01864
			0.614983	0.017206
			0.028957	0.123312
			0.038609	0.183534
			0.417803	0.043016
			0.592921	0.107539
			0.222001	0.025809
			0.603952	0.065957
			0.053777	0.205042
			0.106174	0.024376
			0.233032	0.334089
			0.166845	0.01864
			0.077218	0.031545
			0.066187	0.017206
			0.18615	0.024376
			0.348858	0.017206
			0.202696	0.232285
			0.038609	0.173497
			0.088249	0.193571
			0.035851	0.252359
			0.056534	0.070259
			0.053777	0.167761
			0.485368	0.143386
			0.354374	0.359898
			0.042745	0.154857
			0.063429	0.186401
			0.071702	0.110407
			0.06205	0.057354
			0.380573	0.017206
			0.321281	0.186401
			0.038609	0.064524
			0.06205	0.096068
			0.466064	0.022942
			0.343343	0.098936
			0.157193	0.067391
			0.125479	0.020074
			0.144783	0.057354
			0.097901	0.334089
			0.328175	0.025809
			0.35851	0.022942
			0.419181	0.022942
			0.095143	0.027243
			0.326796	0.038714
			0.166845	0.057354
			0.02482	0.071693
			0.031714	0.067391
			0.255094	0.028869
			0.354374	0.035055
			0.264746	0.027838
			0.020683	0.056707
			0.217864	0.058769
			0.042745	0.101042
			0.362647	0.056707
			0.104795	0.037117
			0.460548	0.076297
			0.165466	0.020621
			0.158572	0.087639
			0.096522	0.124756
			0.020683	0.299002
			0.033093	0.081452
			0.271641	0.108259
			0.350237	0.077328
			0.143404	0.074235
			0.042745	0.540266
			0.278535	1.07022
			1.02451	0.102073
			0.026199	0.474279
			0.039988	0.923813
			0.208212	0.101042
			0.500536	1.83216
			0.017926	0.017528
			0.041367	0.241264
			0.091006	0.539235
			0.485368	0.130942
			0.879729	0.053614
			0.612226	0.071142
			0.023441	0.587694
			0.675654	0.768126
			0.117205	0.040211
			0.228895	0.129911
			0.119963	0.392827
			0.096522	0.241264
			0.039988	1.37953
			0.102038	0.097949
			0.070323	0.90113
			0.261988	0.125787
			0.188907	0.084545
			0.033093	0.313437
			0.082733	0.471186
			0.041367	0.439224
			0.169603	0.093825
			0.114448	0.086607
			0.023441	1.08672
			0.234411	1.48264
			0.077218	0.043304
			0.404014	0.163936
			0.082733	0.325809
			0.11169	0.053614
			0.222001	0.115477
			0.140646	0.40623
			0.257852	0.020621
			0.113069	0.719667
			0.5943	0.172184
			0.296461	0.173215
			0.493641	1.34448
			0.102038	0.200022
			0.026199	0.60419
			0.019304	0.081452
			0.103417	0.071142
			0.107553	0.239202
			0.033093	1.41356
			0.162709	0.136097
			0.290945	0.111352
			0.129615	0.080421
			0.692201	0.020621
			0.071702	0.091763
			0.085491	0.03918
			0.033093	0.031962
			0.060671	0.064956
			0.052398	0.020621
			0.034472	0.034024
			0.068944	0.051552
			0.1241	0.052583
			0.343343	0.030931
			0.060671	0.144354
			0.60671	0.020921
			0.402635	0.214439
			0.406771	0.229084
			0.579132	0.024059
			0.048261	0.046026
			0.587406	0.029289
			0.110311	0.05021
			0.084112	0.053348
			0.020683	0.017783
			0.093764	0.114019
			0.132373	0.020921
			0.282672	0.036612
			0.042745	0.028243
			0.067565	0.108789
			0.107553	0.041842
			0.027328	0.673652
			0.075152	0.037658
			0.06832	0.026151
			0.101341	0.248958
			0.03416	0.238498
			0.018219	0.059624
			0.140056	0.183058
			0.11956	0.017783
			0.29947	0.117157
[truncated: 2,585 more rows]
