# Supplementary material for: Capping protein regulates endosomal trafficking by controlling F-actin density around endocytic vesicles and recruiting RAB5 effectors
Source: eLife. 2021 Nov 19;10:e65910. doi: 10.7554/eLife.65910 (PMC8654373; doi:10.7554/eLife.65910)
Supplement: Figure 4—figure supplement 1—source data 1. [file elife-65910-fig4-figsupp1-data1.xlsx]

## Sheet: Sheet1
	Figure S4A						Figure S4B			Figure S4C
	CK-636	-	+	-	+		Mander‘s Coefficients（Rab5A/Actin）			Manders' coefficient（Rab5A/Rab7）
	CapZb-sg	-	-	+	+		scramble-sg	ARP2-sg
		0.099	0.065	0.515	0.016		0.41	0.166		scramble-sg	Capzβ-sg	ARP2-sg
		0.078	0.008	0.373	0.033		0.464	0.249		0.565	0.279	0.673
		0.199	0.062	0.63	0.132		0.385	0.256		0.521	0.26	0.612
		0.25	0.067	0.586	0.065		0.407	0.285		0.461	0.219	0.611
		0.028	0.069	0.52	0.078		0.432	0.214		0.503	0.303	0.636
		0.093	0.007	0.372	0.069		0.393	0.206		0.397	0.242	0.621
		0.065	0.091	0.165	0.065		0.399	0.123		0.488	0.252	0.596
		0.086	0.005	0.588	0.085		0.513	0.15		0.56	0.256	0.606
		0.03	0.036	0.4	0.035		0.314	0.236		0.687	0.287	0.582
		0.164	0.01	0.456	0.315		0.392	0.134		0.437	0.237	0.603
		0.013	0.015	0.593	0.015		0.363	0.241
		0.111	0.036	0.248	0.035		0.45	0.163
		0.237	0.013	0.258	0.064
		0.13	0.027	0.361	0.005
		0.123	0.066	0.402	0.004
		0.141	0.189	0.123	0.013
		0.196	0.146	0.589	0.008
		0.223	0.122	0.617	0.018
		0.084	0.016	0.681	0.02
		0.206	0.022		0.033
		0.221	0.007		0.231
		0.307	0.03		0.04
			0.045		0.005
			0.02		0.007
			0.038		0.011
			0.07
