# Supplementary material for: Capping protein regulates endosomal trafficking by controlling F-actin density around endocytic vesicles and recruiting RAB5 effectors
Source: eLife. 2021 Nov 19;10:e65910. doi: 10.7554/eLife.65910 (PMC8654373; doi:10.7554/eLife.65910)
Supplement: Figure 4—source data 2. [file elife-65910-fig4-data2.xlsx]

## Sheet: Sheet1
Figure 4A	Number					Size						Figure 4B				Figure 4C	Number					Size						Figure 4D	Number					Size
CapZb-sg	-	-	+	+		CapZb-sg	-	-	+	+		WT	ARP2KO			ARP2-sg	-	+	-	+		ARP2-sg	-	+	-	+		VPS8-sg	-	+	-	+		VPS8-sg	-	+	-	+
CK-636	-	+	-	+		CK-636	-	+	-	+		0.326	0.206			CapZb-sg	-	-	+	+		CapZb-sg	-	-	+	+		ARP2-sg	-	-	+	+		ARP2-sg	-	-	+	+
	198	59	482	237			0.077076	0.03774	0.116087	0.03521		0.489	0.128				71	61	593	210			0.196276	0.037133	0.047015	0.07848			40	91	74	112			0.032739	0.051276	0.11154	0.062516
	147	45	328	174			0.066528	0.110161	0.066522	0.051691		0.411	0.12				79	62	424	264			0.107156	0.05517	0.044541	0.053955			52	143	26	160			0.051997	0.146046	0.075986	0.119547
	134	49	340	240			0.037321	0.140761	0.117391	0.074914		0.363	0.127				44	37	430	172			0.118827	0.107156	0.054439	0.099082			83	138	31	130			0.21232	0.152456	0.039736	0.070193
	89	66	336	191			0.075453	0.163202	0.09	0.098138		0.461	0.117				135	20	493	235			0.088059	0.129436	0.180638	0.064746			62	150	45	129			0.172359	0.141926	0.049496	0.107483
	148	155	311	277			0.041377	0.03621	0.113478	0.152076		0.496	0.2				57	26	460	223			0.096547	0.095486	0.04949	0.080442			66	86	47	100			0.032257	0.112625	0.043919	0.059225
	125	82	322	234			0.038943	0.131071	0.040435	0.093643		0.361	0.204				105	24	238	129			0.054109	0.060474	0.089082	0.121645			101	94	87	95			0.139139	0.139637	1.62708	0.142579
	102	66	424	298			0.034075	0.083641	0.061304	0.030715		0.364	0.242				119	42	481	360			0.074267	0.053048	0.215281	0.177562			105	65	41	100			0.087143	0.146962	0.108751	0.179869
	99	67	287	188			0.036509	0.03876	0.122608	0.041203		0.382	0.193				126	40	551	116			0.093364	0.046682	0.074235	0.050031			38	53	85	64			0.095327	0.148793	0.299763	0.044967
	89	52	488	205			0.09817	0.170342	0.146087	0.176048		0.329	0.078				132	43	460	253			0.271604	0.038194	0.106403	0.255061			35	151	53	126			0.047664	0.044409	0.768229	0.044967
	138	50	374	378			0.352113	0.107611	0.061304	0.057684		0.358	0.157				83	28	393	207			0.296006	0.048804	0.051964	0.104968			184	79	96	112			0.057293	0.371296	0.830273	0.287352
	123	57	358	244			0.052736	0.082621	0.09	0.155822		0.47	0.199				105	35	413	321			0.185667	0.115644	0.074235	0.063765			70	107	37	95			0.172359	0.118119	0.516568	0.280771
	87	95	438	274			0.120076	0.284073	0.06913	0.152825		0.469	0.1				162	54	303	141			0.203703	0.094425	0.133623	0.117721			57	58	59	53			0.118437	0.165275	0.04113	0.088838
	215	54	369	263			0.038132	0.194312	0.113478	0.172303		0.253	0.148				130	47	535	131			0.085937	0.050926	0.047015	0.080442			134	97	69	99			0.239281	0.134143	0.966212	0.07787
	78	41	384	223			0.150094	0.399334	0.043043	0.117615		0.317	0.241				96	50	249	164			0.813751	0.138985	0.076709	0.095157			113	127	58	63			0.081365	0.093396	0.040433	0.039483
	101	60	325	279			0.049491	0.056101	0.105652	0.152825		0.319	0.153				108	68	335	321			0.17824	0.059413	0.059388	0.089271			77	82	21	112			0.202691	0.41479	0.040433	0.159031
	204	65	459	131			0.275038	0.135151	0.225652	0.119114		0.392	0.142				218	85	462	229			0.288579	0.257812	0.074235	0.361991			42	101	32	103			0.232059	0.037084	0.098991	0.044967
	228	54	337	193			0.043811	0.533465	0.165652	0.119114		0.438	0.085				57	122	342	112			0.777679	0.559122	0.116301	0.288416			48	112	81	112			0.18921	0.119492	0.271181	0.041677
	90	45	337	238			0.169566	0.0459	0.058695	0.09589		0.278	0.117				93	60	444	126			0.064718	0.517745	0.12125	0.168733			70	96	79	85			0.250836	0.171227	0.365292	0.094322
	137	66	390	194			0.03083	0.054061	0.190434	0.042701		0.297	0.174				129	76	361	289			0.061535	0.141107	0.150944	0.03924			139	92	56	150			0.641774	0.087902	0.359018	0.318061
	124	78	445	318			0.083566	0.548765	0.104348	0.047945		0.289	0.203				94	58	603	217			0.232349	1.39197	0.084133	0.154018			92	80	32	126			0.069329	0.112625	0.243296	0.070193
		43	392				0.475434	0.206552	0.062609	0.032962		0.346	0.13				47	109	445	253			0.216434	0.569732	0.138572	0.050031			89	42					0.084735	0.038457	0.044616	0.098709
		60	361				0.094925	0.061711	0.183913	0.102633			0.177				117	88	512	349			0.095486	0.603682	0.051964	0.300188				102					0.115548	0.141926	0.161035	0.055935
		64	305				0.039755	0.450844	0.18913	0.059931							165	90	379				0.109278	0.185667	0.061862	0.235441									0.234467	0.089734	0.118511	0.073483
		45					0.105472	0.123931	0.091304	0.120612							73	59					0.141107	0.266299	0.232602	0.084366									0.230134	0.121782	0.572337	0.109676
		54					0.201208	0.154531	0.135652	0.053938							83	46					0.152777	0.239775	0.039592	0.109873									0.064996	0.041662	0.057164	0.131612
		60					0.142793	0.300393	0.096521	0.111622							139	91					0.15596	0.058352	0.039592	0.056898									0.052478	0.087445	0.739647	0.060322
							0.093302	0.293253	0.09	0.184289							85						0.06684	0.170813	0.089082	0.085347									0.075588	0.050819	0.071106	0.039483
							0.342378	0.260102	0.035217	0.030715													0.578219	0.270543	0.155893	0.065727									0.195951	0.054023	1.5978	0.039483
							0.10466	0.04896	0.052174	0.056186													0.123071	0.149594	0.103929	0.046107									0.111697	0.424404	0.132453	0.048258
							0.142793	0.087721	0.140869	0.102633													0.084876	0.466819	0.04949	0.084366									0.428973	0.096601	0.045313	0.180966
							0.144415	0.066301	0.19826	0.056186													0.107156	0.223861	0.153419	0.056898									0.088106	0.075541	0.075986	0.03729
							0.135491	0.455434	0.217825	0.278681													0.406345	1.03655	0.076709	0.150094									0.151176	0.28202	0.126179	0.099805
							0.071396	0.098431	0.073043	0.031464													0.496526	0.098669	0.059388	0.142246									0.071255	0.08424	0.054376	0.048258
							0.113585	0.258062	0.045652	0.102633													0.102912	0.067901	0.123725	0.072594									0.388531	0.539318	0.075289	0.33561
							0.062472	0.705847	0.052174	0.218													0.056231	0.223861	0.037117	0.194239									0.086661	0.112625	0.570943	0.059225
							0.248264	0.587525	0.09913	0.038955													0.046682	0.477429	0.133623	0.101044									0.326424	0.059517	0.098991	0.119547
							0.174434	0.269793	0.061304	0.311643													0.041377	0.412711	0.153419	0.121645									0.119881	0.043493	0.104568	0.048258
							0.301	0.292743	0.036522	0.370825													0.043499	0.076389	0.074235	0.152056									0.129029	0.129107	0.310917	0.059225
							0.063283	0.03009	0.035217	0.036708													0.170813	0.04456	0.183112	0.041202									0.106401	0.744424	0.099688	0.07129
							0.060038	0.131071	0.091304	0.03521													0.676888	0.354358	0.131148	0.131455									0.072699	0.076915	0.145001	0.400319
							0.312359	0.137191	0.113478	0.241224													0.071084	0.054109	0.091556	0.109873									0.047182	0.15795	0.759863	0.052645
							0.034887	0.493685	0.273912	0.034461													0.198398	0.477429	0.101454	0.066708									0.049589	0.112625	0.061347	0.050451
							0.287208	0.05355	0.045652	0.180543													0.254629	0.063657	0.126199	0.069651									0.06981	0.07783	0.066227	0.042774
							0.055981	0.03009	0.035217	0.105629													0.443478	0.084876	0.064337	0.069651									0.259021	0.158408	0.053678	0.133805
							0.092491	0.062221	0.082174	0.075663													0.296006	0.062596	0.039592	0.054936									0.254688	0.111252	0.161732	0.093225
							0.168755	0.886898	0.050869	0.238227													0.192033	0.312981	0.061862	0.05886									0.058737	0.154745	0.058558	0.719477
							0.381321	0.304473	0.084782	0.299657													0.578219	0.04456	0.064337	0.08829									0.187766	0.15795	0.039736	0.080064
							0.057604	0.421264	0.075652	0.055437													0.285396	0.168692	0.14847	0.057879									0.142028	0.09889	0.04601	0.112967
							0.060849	0.071911	0.136956	0.501925													0.288579	0.07745	0.074235	0.071613									0.048145	0.07783	0.253753	0.059225
							0.086811	0.350373	0.031304	0.178296													0.337383	0.068962	0.054439	0.171676									0.145398	0.818133	0.097597	0.225933
							0.066528	0.417184	0.033913	0.144584													0.176118	0.106095	0.039592	1.46758									0.090031	0.111709	0.184737	0.14916
							0.137113	0.147901	0.050869	0.295911													0.123071	1.93624	0.037117	0.514047									0.077032	0.127733	0.192406	0.299416
							0.107094	0.03417	0.044348	0.040454													0.143229	0.743728	0.205383	0.338447									0.27202	0.14101	0.112934	0.822572
							0.167944	0.135661	0.079565	0.038206													0.110339	0.141107	0.037117	0.154999									0.236874	0.055855	0.057164	0.203998
							0.639321	0.04437	0.066522	0.051691													0.192033	0.083815	0.118776	0.040221									0.078958	0.162986	0.317191	0.932249
							0.136302	0.190232	0.103043	0.053189													0.736301	0.061535	0.081658	0.03924									0.324498	0.192744	0.121299	0.182063
							0.391868	0.04692	0.043043	0.045698													0.148533	0.078511	0.069286	0.072594									0.037553	0.067758	0.044616	0.579091
							0.042189	0.097411	0.057391	0.211258													0.190972	0.088059	0.069286	0.056898									0.041886	0.184046	0.539573	0.052645
							0.06166	0.070381	0.043043	0.073416													0.056231	0.128375	0.101454	0.200125									0.260465	0.471102	0.740344	0.119547
							0.060038	0.164745	0.031304	0.037457													0.168692	0.040316	0.04949	0.075537									0.281649	0.252262	1.12167	0.120644
							0.065717	0.063669	0.153913	0.044949													0.2228	0.214312	0.108878	0.069651									0.038998	0.060433	0.057164	0.065806
							0.440547	0.207722	0.078261	0.047196													0.112461	0.049297	0.094031	0.236422									0.719288	0.037999	0.191709	0.095418
							0.220679	0.07322	0.152608	0.080907													0.223861	0.056966	0.128674	0.481674									0.750101	0.071421	0.045313	0.100902
							0.85351	0.25229	0.063913	0.128103													0.042438	0.06719	0.153419	0.132436									0.141065	0.314526	0.73407	0.199611
							0.20283	0.087545	0.049565	0.065925													0.071084	0.04455	0.126199	0.163828									0.151657	0.072336	0.038342	0.054838
							0.14117	0.035814	0.093913	0.053938													0.039255	0.13438	0.059388	0.241327									0.416937	0.277442	0.920899	0.75238
							0.054359	0.366099	0.035217	0.062928													0.198398	0.077415	0.173214	0.061803									0.064996	0.18954	0.039039	0.369609
							0.038943	0.188621	0.036522	0.056935													0.047743	0.051123	0.044541	0.317846									0.141065	0.269201	0.039039	0.576897
							0.064906	0.467174	0.044348	0.374571													0.067901	0.057696	0.054439	0.921164									0.369754	0.173058	0.050193	0.107483
							0.556566	0.284921	0.062609	0.118365													0.071084	0.108819	0.039592	0.069651									0.043331	0.171227	0.125482	0.116257
							0.038943	0.167132	0.037826	0.128852													0.167631	1.48622	0.079184	0.332561									0.038035	0.041204	0.055073	0.15245
							0.042189	0.145644	0.139565	0.187286													0.043383	0.354939	0.096505	0.358067									0.099179	0.065011	0.054376	0.26432
							0.36834	0.17907	0.036522	0.053938													0.225591	0.450247	0.123725	0.11674									0.443898	0.076457	0.041827	0.107483
							0.033264	0.265024	0.06913	0.080907													0.098913	0.259997	0.037117	0.12655									0.111215	0.043036	0.06065	0.266513
							0.038943	0.134502	0.075652	0.092894													0.102384	0.039803	0.252398	0.075537									0.154546	0.048987	0.056503	0.133805
							0.62634	0.203742	0.057391	0.146832													0.116266	0.0566	0.074235	0.147151									0.336053	0.045325	0.070526	0.218256
							0.081943	0.077995	0.044348	0.042701													0.136222	0.483842	0.101454	0.040221									0.181989	0.452331	1.3004	0.393738
							0.055981	0.21568	0.09913	0.285423													0.354873	0.181852	0.141046	0.954518									0.255169	0.056312	0.039594	0.18645
							0.090057	1.06328	0.057391	0.050942													0.2039	0.094577	0.190536	0.349238									0.653329	0.086987	0.174459	0.085548
							0.133057	0.864313	0.100435	0.249464													0.219518	0.125616	0.12125	0.50718									0.040442	0.158865	0.086611	0.178772
							0.150906	0.300042	0.061304	0.15732													0.35227	0.422495	0.180638	0.238384									0.069329	0.154287	0.06269	0.575801
							0.195528	0.580984	0.09913	0.039705													0.343593	0.072668	0.081658	0.092214									0.365903	0.158408	0.080837	0.190837
							0.323717	0.345407	0.082174	0.080907													0.439903	0.068651	0.136097	0.037278									0.405382	0.139179	0.042893	0.114063
							0.054359	0.382813	0.131739	0.101883													0.372226	0.131094	0.037117	0.119683									0.046219	0.041662	0.06104	0.064709
							0.086811	0.11938	0.101739	0.03521													0.098045	0.120869	0.497373	0.671008									0.147805	0.133685	0.046192	0.212772
							0.038132	0.179866	0.101739	0.15732													0.178738	0.128173	0.197959	0.180505									0.19258	0.378621	0.094859	0.34548
							0.835661	0.068445	0.058695	0.151327													0.114531	0.150813	0.128674	0.130474									0.058737	0.2106	0.094035	0.051548
							0.137113	0.60486	0.041739	0.049443													0.406064	0.611284	0.064337	0.051012									0.135769	0.079662	0.041656	0.142579
							0.295321	0.343815	0.031304	0.065925													0.156179	0.081432	0.039592	0.289397									0.046701	0.508186	0.051966	0.355351
							0.030019	0.109034	0.032609	0.101883													0.084163	0.094943	0.274669	0.10693									0.057774	0.05265	1.08841	0.101999
							0.050302	0.068445	0.037826	0.149828													0.129281	0.68943	0.207857	0.197182									0.094364	0.156118	0.071763	0.119547
							0.084377	0.148827	0.083478	0.187286													0.275048	0.082892	0.215281	0.096139									0.038035	0.114118	0.064752	0.093225
							0.057604	0.243536	0.036522	0.051691													0.124075	0.212525	0.22023	0.099082									0.043642	0.056395	0.118368	0.066903
							0.090868	0.079587	0.033913	0.076413													0.170061	0.145335	0.064337	0.150094									0.044806	0.051088	1.71077	0.059225
							0.117642	0.210109	0.080869	0.156571													0.045986	0.229688	0.17074	0.745564									0.146638	0.050424	0.169922	0.257739
							0.460019	0.038998	0.097826	0.059182													0.137958	0.097499	0.136097	1.6167									0.099505	0.06502	0.627722	0.456254
							0.059226	0.24274	0.071739	0.754386													0.328843	0.108454	0.04949	0.178543									0.052953	0.041799	0.588541	0.38277
							0.462453	0.08277	0.035217	0.068921													0.691524	0.295418	0.047015	0.051993									0.045388	0.060376	1.14491	0.069096
							0.048679	0.213293	0.092608	0.04345													0.365284	0.085814	0.037117	0.127531									0.057026	0.099521	0.100634	0.041677
							0.057604	0.32551	0.148695	0.071918													0.275916	0.105167	0.066811	0.124588									0.151294	0.111464	0.075475	0.059225
							0.161453	0.045364	0.108261	0.045698													0.061604	0.179296	0.160842	0.110854									0.129181	0.057059	0.081148	0.281868
							0.032453	0.190212	0.163043	0.068921													0.05206	0.038707	0.042066	0.103987									0.050043	0.150609	0.204152	0.096515
							0.281529	0.042181	0.073043	0.100385													0.091972	0.038707	0.037117	0.187372									0.158276	0.072982	0.425815	0.061419
							0.040566	0.144052	0.050869	0.215753													1.04379	0.282637	0.047015	0.081423									0.192608	0.044453	0.041855	0.050451
							0.163887	0.08742	0.06913	0.03521													0.282857	0.054044	0.074235	0.079461									0.072737	0.122079	0.065773	0.185353
							0.120076	0.083296	0.080869	0.074165													0.060736	0.108819	0.039592	0.056898									0.07041	0.109473	0.061929	0.053741
							0.038943	0.120821	0.101739	0.077911													0.113663	0.059157	0.108878	0.120664									0.0675	0.134685	0.884089	0.07129
							0.231227	0.126593	0.037826	0.065925													0.079825	0.23407	0.12125	0.299207									0.156531	0.246812	0.559069	0.047161
							0.115208	0.050307	0.09	0.481698													0.073751	0.047106	0.039592	0.041202									0.148966	0.17383	0.622279	0.03729
							0.292076	0.205766	0.078261	0.260702													0.051192	0.337046	0.321684	0.037278									0.418967	0.139993	1.25566	0.073483
							0.232038	0.108037	0.080869	0.082406													0.065942	0.054044	0.069286	0.090252									0.076229	0.155916	0.23533	0.072386
							0.098981	0.083296	0.049565	0.053938													0.290666	0.114661	0.207857	0.040221									0.379398	0.106819	0.144358	0.117354
							0.056792	0.367822	0.037826	0.146832													0.083295	0.357496	0.150944	0.539553									0.046552	0.039145	0.294269	0.080732
							0.089245	0.179787	0.043043	0.032213													0.117134	0.070842	0.089082	0.280567									0.409656	0.111464	0.073033	0.040048
							0.181736	0.22226	0.078261	0.032213													0.05553	0.113201	0.047015	0.158923									0.130345	0.074973	0.38097	0.106796
							0.15334	0.325349	0.169565	0.092894													0.517125	0.048202	0.089082	0.074556									0.072155	0.115445	0.322885	0.057212
							0.030019	0.300608	0.056087	0.057684													0.039912	0.071572	0.051964	0.114778									0.050043	0.392777	0.052533	0.106796
							0.111151	0.495653	0.050869	0.277932													0.162252	0.037247	0.059388	0.089271									0.203082	0.168522	0.050824	0.052762
							0.347246	0.309267	0.041739	0.159567													0.039045	0.081066	0.076709	0.127531									0.077392	0.048434	0.155036	0.113152
							0.159019	0.421016	0.406955	0.149079													0.074619	0.076684	0.064337	0.148132									0.107069	0.041135	0.315197	0.052762
							0.307491	0.094842	0.056087	0.802331													0.308887	0.154464	0.103929	0.042183									0.160022	0.145301	0.15888	0.061026
							0.146849	0.722449	0.033913	0.080907													0.235136	0.040168	0.044541	0.914297									0.206574	0.039145	0.222517	0.453881
							0.274227	0.090718	0.09	0.446489													0.074619	0.082892	0.039592	0.135379									0.185044	0.084925	0.054668	0.06484
							0.035698	0.054431	0.067826	0.185787													0.163988	0.046241	0.106403	0.606261									0.824549	0.25013	0.044845	0.133494
							0.302623	0.574825	0.032609	0.302653													0.61517	0.043427	0.037117	0.207973									0.199009	0.056395	0.516786	0.09726
							0.188227	0.127418	0.053478	0.070419													0.118869	0.081224	0.037117	0.059841									0.237414	0.066347	0.394637	0.050219
							0.137925	0.065152	0.13826	0.172303													0.057265	0.058706	0.044541	0.040221									0.07041	0.470403	0.178099	0.047677
							0.036509	0.390089	0.109565	0.223994													0.170061	0.113794	0.133623	0.06867									0.056444	0.136012	0.16913	0.063569
							0.038943	0.031339	0.34826	0.438997													0.542287	0.124249	0.089082	0.252118									0.037823	0.109473	0.065346	0.230755
							0.091679	0.502663	0.06913	0.347602													0.130149	0.211504	0.272194	0.053955									0.04306	0.268707	0.155036	0.054669
							0.162264	0.446994	0.03913	0.155072													0.179605	0.136311	0.155893	0.486579									0.051789	0.788207	0.799524	0.11061
							0.477057	0.454417	0.109565	0.162564													0.053795	0.76439	0.076709	0.07848									0.12569	0.037818	0.057019	0.306401
							0.048679	0.298134	0.050869	0.190282													0.131884	0.259354	0.042066	0.043164									0.085539	0.065684	0.068336	0.645859
							0.044623	0.144325	0.052174	0.30565													0.198694	0.417781	0.111352	0.067689									0.185044	0.08028	0.051796	0.779353
							0.281529	0.04371	0.101739	0.169306													0.131017	0.715736	0.086607	0.14617									0.042479	0.096204	0.038303	0.473587
							0.046245	0.123295	0.065217	0.13934													0.249018	0.101329	0.116301	0.128512									0.037823	0.258755	0.084441	0.040048
							0.096547	0.121645	0.062609	0.146832													0.041648	1.94375	0.262296	0.05886									0.053535	0.092886	0.040479	0.244104
							0.049491	0.190096	0.03913	0.137842													0.08156	0.073986	0.04949	0.249175									0.05819	0.076963	0.637224	0.038141
							0.068151	0.032164	0.041739	0.151327													0.28546	0.116207	0.249924	0.160885									0.149548	0.049097	0.24157	0.151929
							0.133868	0.149685	0.125217	0.07866													0.263768	0.158427	0.168265	0.228574									0.203664	0.081607	0.167576	0.136673
							0.049491	0.03505	0.044348	0.152076													0.038177	0.184965	0.039592	0.051012									0.073901	0.102175	0.211102	0.102346
							0.472189	0.217312	0.169565	0.05244													0.08156	0.720963	0.091556	0.074556									0.217048	0.131368	0.049185	0.767275
							0.070585	0.054019	0.073043	0.262949													0.21865	0.481312	0.086607	1.43619									0.099505	0.291265	0.094452	0.095353
							0.053547	0.079997	0.103043	0.125856													0.106722	0.100123	0.047015	0.045126									0.041897	0.248139	0.356915	0.083275
							0.038132	0.15917	0.045652	0.173052													0.065942	0.12063	0.118776	0.060822									0.090776	0.045116	0.06616	0.13858
							0.109528	0.119171	0.061304	0.612798													0.09284	0.103741	0.047015	0.046107									0.3311	0.06104	0.111862	0.048312
							0.148472	0.044947	0.040435	0.048694													0.11106	0.041818	0.079184	0.043164									0.223449	0.067674	0.098369	0.12968
							0.324529	0.25731	0.032609	0.147581													0.088501	0.201049	0.056913	0.052974									0.183298	0.101512	0.051796	0.524442
							0.064094	0.030514	0.126521	0.176798													0.147502	0.110577	0.155893	0.114778									0.701769	0.063694	0.150165	0.139216
							0.051113	0.105151	0.036522	0.197024													0.139693	0.050262	0.103929	0.05886									0.082048	0.827352	0.615896	0.180535
							0.180925	0.054431	0.078261	0.099636													0.052441	0.040612	0.096505	0.166771									0.234505	0.105492	0.273345	0.113152
							0.049491	0.103089	0.041739	0.333368													0.040787	0.098514	0.262296	0.065727									0.375324	0.115445	0.038303	0.157651
							0.084377	0.049895	0.070435	0.06967													0.185728	0.043427	0.267245	0.047088									0.040733	0.177811	0.06703	0.165279
							0.094925	0.064869	0.25826	0.269691													0.095413	0.102937	0.039592	0.278605									0.528945	0.212975	0.075736	0.133494
							0.313981	0.532766	0.130434	0.146832													0.107067	0.05549	0.07176	0.269776									0.354376	0.214302	0.038738	0.077554
							0.086811	0.242057	0.216521	0.349849													0.517854	0.054685	0.287041	0.13636									0.422458	0.077626	0.064419	0.416375
							0.510321	0.115323	0.091304	0.095141													0.305905	0.057902	0.04949	0.22465									0.440497	0.053078	0.054408	0.108067
							0.109528	0.192805	0.031304	0.033711													0.254193	0.254126	0.150944	0.16579									0.180388	0.682715	0.065725	0.100439
							0.152528	0.051054	0.052174	0.041203													0.069193	0.041818	0.044541	0.120664									0.173406	0.098858	0.149295	0.158922
							0.084377	0.057061	0.09	0.180543													0.048799	0.17813	0.094031	0.041202									0.475993	0.177811	0.494893	0.088361
							0.040566	0.043847	0.086087	0.032213													0.072106	0.088813	0.101454	0.048069									0.100086	0.088242	0.167141	0.083275
							0.335887	0.031233	0.095217	0.11387													0.343779	0.089224	0.039592	0.103987									0.235087	0.051751	0.144072	0.168457
							0.033264	0.066671	0.075652	0.066674													0.196653	0.197318	0.17074	0.094176									0.054698	0.064357	0.261157	0.474859
							0.173623	0.226441	0.062609	0.096639													0.089587	0.139681	0.173214	0.197182									0.105324	0.090896	0.05789	0.230755
							0.033264	0.254671	0.049565	0.104131													0.222874	0.076917	0.173214	0.202087									0.041315	0.10881	0.242441	0.132223
							0.072208	0.383808	0.050869	0.038955													0.041516	0.040202	0.037117	0.077499									0.045388	0.072319	0.085311	0.056576
							0.076264	0.040243	0.056087	0.050193													0.039331	0.140091	0.094031	0.05886									0.109979	0.122079	0.059196	0.095989
							0.047868	0.226441	0.078261	0.117615													0.040059	0.258031	0.042066	0.069651									0.36485	0.227572	0.290755	0.053398
							0.060849	0.44207	0.336521	0.125856													0.086673	0.195267	0.123725	0.090252									0.064009	0.071655	0.273345	0.050219
							0.268547	1.80852	0.082174	0.050193													0.084488	0.151783	0.126199	0.043164									0.059935	0.044453	0.41524	0.074375
							0.038943	0.827079	0.035217	0.194777													0.058268	0.285311	0.225179	0.098101									0.188535	0.174494	0.077477	0.155744
							0.047868	0.058262	0.065217	0.056186													0.08813	0.754196	0.054439	0.067689									0.041315	0.245485	0.079218	0.083275
							0.450283	0.062466	0.046956	0.075663													0.072106	0.134143	0.141046	0.405155									0.09194	0.2216	0.053972	0.066112
							0.159019	0.189802	0.06	0.055437													0.344508	0.050047	0.094031	0.080442									0.130345	0.065684	0.103157	0.111881
							0.106283	0.166377	0.160434	0.511664													0.0925	1.05735	0.037117	0.239365									0.077392	0.371545	0.095758	0.063569
							0.273415	0.06547	0.048261	0.405286													0.042244	0.059688	0.267245	0.09712									0.094504	0.108146	0.145813	0.104889
							0.044623	0.069073	0.043043	0.071169													0.326299	0.160398	0.178163	0.349238									0.05311	0.100185	0.107737	0.062933
							0.158208	0.580217	0.037826	0.033711													0.37874	0.04656	0.17074	0.127531									0.072245	0.153263	0.041333	0.109338
							0.032453	0.078083	0.041739	0.031464													0.081575	0.091275	0.069286	0.13636									0.07576	0.042462	0.037945	0.104889
							0.030019	0.070875	0.118695	0.204516													0.040787	0.100915	0.111352	0.053955									0.272969	0.082271	0.05895	0.113788
							0.056792	0.739386	0.076956	0.030715													0.227972	0.159447	0.039592	0.064746									0.037489	0.651532	0.113835	0.080097
							0.073019	0.723169	0.123913	0.64651													0.117992	0.129733	0.393444	0.047088									0.078103	0.557318	0.104349	0.191978
							0.234472	0.087093	0.096521	0.089148													0.309547	0.303731	0.301888	0.060822									0.050376	0.080944	0.055562	0.174814
							0.063283	0.08469	0.065217	0.059931													0.053169	0.051464	0.04949	0.037278									0.062873	0.043126	0.062338	0.047677
							0.043	0.184997	0.062609	0.068172													0.560826	0.084089	0.066811	0.074556									0.141757	0.046443	0.069114	0.109338
							0.218245	0.063668	0.256956	0.204516													0.286968	0.342329	0.091556	0.128512									0.050767	0.42197	0.444499	0.054033
							0.047057	0.368191	0.032609	0.209011													0.574665	0.177062	0.111352	0.168733									0.048814	0.087579	0.162622	0.255546
							0.038132	1.19707	0.264782	0.041203													0.47998	0.288721	0.044541	0.085347									0.071464	0.092886	0.160589	0.72087
							0.055981	0.090096	0.196956	0.332619													0.165334	0.241545	0.079184	0.08829									0.03788	0.052414	0.055562	0.31403
							0.051925	0.382607	0.173478	0.040454													0.539704	0.071989	0.259822	0.060822									0.195257	0.239514	0.048109	0.061026
							0.10466	0.043246	0.040435	0.058433													0.086673	0.402984	0.047015	0.108892									0.064044	0.047107	0.122644	0.082639
							0.166321	0.166978	0.080869	0.173801													0.041516	0.170322	0.094031	0.187372									0.123402	0.612387	0.045399	0.385227
							0.047868	0.06547	0.097826	0.317636													0.234527	0.047329	0.19301	0.113797									0.145271	0.08028	0.197179	0.122052
							0.105472	0.051655	0.100435	0.092894													0.315374	0.053762	0.103929	0.052974									0.180417	0.295246	0.072502	0.153836
							0.069774	0.288907	0.03913	0.484695													0.271617	0.044878	0.042066	0.121645									0.10622	0.508221	0.104349	0.164007
							0.047057	0.27269	0.083478	0.303403													0.05233	0.189468	0.051964	0.161866									0.271798	0.122079	0.098251	0.04132
							0.068962	0.477508	0.153913	0.056186													0.047346	0.42795	0.123725	0.056898									0.121059	0.049761	1.41481	0.137309
							0.102227	0.11292	0.100435	0.072667													0.108398	0.077962	0.096505	0.119683									0.087866	0.201696	0.058273	0.057848
							0.159019	0.475706	0.114782	0.093643													0.189384	0.046869	0.155893	0.044145									0.331156	0.178475	0.605766	0.132859
							0.055981	0.080486	0.101739	0.036708													0.076003	1.9489	0.079184	0.080442									0.04569	0.123406	0.672169	0.064204
							0.06734	0.064268	0.049565	0.05244													0.068527	0.236644	0.143521	0.138322									0.049595	0.1871	0.138228	0.339457
							0.069774	0.097303	0.161739	0.199272													0.049838	0.037526	0.047015	0.115759									0.185494	0.150609	0.082666	0.984044
							0.054359	0.088294	0.058695	0.220997													0.074757	0.047941	0.039592	0.177562									0.067949	0.04777	2.02193	0.264446
							0.040566	0.237252	0.075652	0.153574													0.049838	0.49519	0.106403	0.120664									0.040613	0.076963	0.049464	0.960524
							0.266113	0.101508	0.238695	0.217251													0.163219	0.057744	0.094031	0.037278									0.099972	0.050424	0.081311	0.083911
							0.091679	0.044447	0.032609	0.146832													0.225517	0.158988	0.042066	0.047088									0.275703	0.04578	0.409942	0.385862
							0.030019	0.100307	0.057391	0.040454													0.047346	0.038115	0.044541	0.584679									0.09138	0.04578	0.153135	0.058483
							0.038132	0.091898	0.183913	0.047196													0.08597	0.080889	0.051964	0.037278									0.12926	0.134685	0.10977	0.072468
							0.064906	0.132741	0.273912	0.038955													0.082233	0.061408	0.044541	0.055917									0.052719	0.233543	0.117223	0.255546
							0.169566	0.054658	0.087391	0.102633													0.304011	0.10037	0.079184	0.103006									0.038661	0.07829	0.073857	0.113152
							0.092491	0.219233	0.031304	0.301155													0.0461	0.121545	0.197959	0.142261									0.039832	0.069001	0.302205	0.106796
							0.190661	0.198811	0.109565	0.168557													0.03987	0.04955	0.244975	0.101196									0.268283	0.175821	0.039978	0.072468
							0.043	0.143553	0.084782	0.055437													0.256665	1.53307	0.09898	0.14666									0.063263	0.074309	1.46834	0.177993
							0.084377	0.092498	0.084782	0.057684													0.204335	0.355741	0.039592	0.064531									0.513916	0.198379	0.065049	0.117602
							0.354547	0.271489	0.142174	0.032213													0.311487	0.140602	0.054439	0.102662									0.146443	0.171176	0.092152	0.145573
							0.043811	0.0943	0.050869	0.105629													0.042362	0.127474	0.076709	0.170126									0.041785	0.268044	0.090119	0.03687
							0.042189	0.043246	0.032609	0.196275													0.412409	0.057173	0.039592	0.080663									0.064825	0.042462	0.069114	0.047041
							0.074642	0.061866	0.097826	0.256956													0.123349	0.146955	0.116301	0.107062									0.695114	0.103502	1.71024	0.249825
							0.094925	0.039642	0.163043	0.101883													0.154498	0.265535	0.066811	0.114395									0.06092	0.098858	0.838179	0.130316
							0.053547	0.118453	0.087391	0.137093													0.320209	0.302803	0.066811	0.060131									0.458073	0.311169	0.074535	0.064204
							0.068962	0.070585	0.063913	0.135595													0.124595	0.07496	0.116301	0.065997									0.041785	0.092223	0.050819	0.200242
							0.231227	0.034075	0.056087	0.31464													0.19063	0.058443	0.145995	0.175993									0.039051	0.088242	0.048109	0.103617
							0.630397	0.043811	0.084782	0.150578													0.068527	0.880882	0.037117	0.250789									0.127698	0.039808	0.089442	0.043227
							0.281529	0.387812	0.040435	0.062928													0.229254	1.16632	0.04949	0.140794									0.216735	0.395431	0.066326	0.153836
							0.136302	0.217434	0.097826	0.044199													0.072265	0.07496	0.066811	0.063064									0.050376	0.114118	0.077279	0.460238
							0.055981	0.131434	0.050869	0.053938													0.09843	0.174906	0.039592	0.060131									0.064825	0.041135	0.06876	0.131587
							0.106283	0.103849	0.133043	0.042701													0.042362	0.128321	0.230128	0.136394									0.163235	0.209658	0.037727	0.177357
							0.035698	0.105472	0.470868	0.143086													0.097184	0.07496	0.138572	0.038132									0.069511	0.058386	0.102836	0.073104
							0.113585	0.304246	0.177391	0.041203													0.054822	0.074536	0.118776	0.055731									0.099972	0.041799	0.11318	0.054033
							0.068962	0.064906	0.088695	0.070419													0.367555	0.04108	0.232602	0.111462									0.052329	0.090232	0.151515	0.080732
							0.127377	0.086	0.084782	0.089148													0.148268	0.077192	0.051964	0.098262									0.048424	0.092223	0.061458	0.191342
							0.064094	0.135491	0.073043	0.092894													0.068527	0.102279	0.059388	0.087996									0.044519	0.061703	0.086406	0.101074
							0.071396	0.039755	0.040435	0.050942													0.120857	0.360871	0.178163	0.230257									0.054281	0.121416	0.041986	0.123323
							0.076264	0.069774	0.078261	0.036708													0.037378	1.50524	0.180638	0.042532									0.135508	0.039145	0.116223	0.234569
							0.038132	0.089245	0.082174	0.094392													0.287814	0.052104	0.351378	0.212658									0.057015	0.043628	0.136912	0.070561
							0.15983	0.123321	0.086087	0.184289													0.0461	0.310697	0.037117	0.161327									0.271017	0.415616	0.273215	0.54097
							0.129	0.079509	0.03913	0.055437													0.054822	0.119647	0.103929	0.067464									0.056624	0.134712	0.39248	0.064204
							0.064906	0.046245	0.043043	0.058058													0.10466	0.08877	0.202908	0.108529									0.068266	0.03827	0.116831	0.059755
							0.081943	0.193906	0.259564	0.059873													0.160727	0.100349	0.160842	0.042532									0.05613	0.173747	0.221492	0.053398
							0.068151	0.206887	0.03913	0.119745													0.237976	0.065613	0.504796	0.190659									0.11327	0.241869	0.075453	0.141758
							0.077076	0.114396	0.058695	0.033565													0.237976	0.082981	0.051964	0.243456									0.273062	0.139304	0.466716	0.258089
							0.030019	0.086811	0.040435	0.315692													0.245452	0.061753	0.04949	0.140794									0.058658	0.194413	0.468542	0.119509
							0.035698	0.093302	0.041739	0.114302													0.114627	0.111928	0.106403	0.042532									0.037925	0.048221	0.25496	0.125866
							0.078698	0.083566	0.082174	0.137889													0.589333	0.054034	0.061862	0.049865									0.046522	0.042097	0.103444	0.044498
							0.129	0.301812	0.063913	0.055337													0.503363	0.055964	0.101454	0.064531									0.229069	0.096441	0.258611	0.394126
							0.049491	0.154151	0.066522	0.036286													0.118365	0.040526	0.056913	0.055731									0.068266	0.051282	0.070585	0.067383
							0.225547	0.278283	0.131739	0.173268													0.083479	0.042455	0.145995	0.127595									0.235643	0.045924	0.214799	0.06039
							0.366717	0.037321	0.136956	0.139703													0.292798	0.239294	0.126199	0.087996									0.130463	0.044394	0.804431	0.432903
							0.090868	0.081943	0.056087	0.156032													0.271617	0.065613	0.277143	0.372518									0.083436	0.285497	0.130827	0.062297
							0.054359	0.033264	0.110869	0.171454													0.08597	0.144734	0.336531	0.209724									0.043488	0.099503	0.10527	0.219312
							0.138736	0.167944	0.050869	0.047172													0.340144	0.038596	0.081658	0.080663									0.085964	0.060467	0.04442	0.088361
							0.082755	0.042189	0.262173	0.070759													0.071019	0.113858	0.044541	0.065997									0.201763	1.0754	0.222709	0.344543
							0.047057	0.46651	0.032609	0.136982													0.077249	0.050175	0.14847	0.118795									0.181536	0.283966	0.093708	0.080097
							0.146849	0.52168	0.053478	0.118838													0.037378	0.050175	0.076709	0.058664									0.076862	0.175278	0.461848	0.055305
							0.124944	1.01415	0.058695	0.047172													0.194368	0.140875	0.141046	0.038132									0.040454	0.152316	0.062067	0.139216
							0.244208	0.065717	0.095217	0.092531													0.62422	0.048245	0.079184	0.042532									0.038431	0.200537	0.164294	0.107431
							0.037321	0.051925	0.06	0.07983													0.043608	2.38329	0.133623	0.049865									0.062198	0.068121	0.142388	0.03687
							0.047868	0.060849	0.123913	0.377379													0.461001	0.530693	0.044541	0.042532									0.333237	0.039801	0.184983	0.055941
							0.031642	0.106283	0.127826	0.063501													0.127087	0.059824	0.106403	0.293321									0.036914	0.067356	0.079104	0.040684
							0.064906	0.869736	0.032609	0.230419													0.056068	0.391748	0.056913	0.221457									0.251319	0.521242	0.21419	0.047677
							0.387812	0.060849	0.056087	0.044451													0.383752	1.23314	0.054439	0.061597									0.062198	0.385	0.206889	0.097896
							0.06166	0.069774	0.063913	0.126096													0.548217	0.28175	0.185587	0.085063									0.045005	0.249523	0.066326	0.080097
							0.081132	0.057604	0.046956	0.110674													0.251681	1.56892	0.047015	0.055731									0.140577	0.399542	0.146647	0.050855
							0.057604	0.077887	0.052174	0.030844													0.693993	0.306837	0.059388	0.090929									0.380265	0.03827	0.215407	0.065476
							0.076264	0.125755	0.126521	0.039008													0.890853	0.052104	0.178163	0.099729									0.051073	0.076541	0.2793	0.048948
							0.147661	0.541151	0.185217	0.136982													0.044854	0.044385	0.096505	0.101196									0.126924	0.045159	0.077279	0.040048
							0.128189	0.055981	0.073043	0.163289													0.064789	0.198769	0.074235	0.063064									0.270028	0.058171	0.341366	0.048948
							0.118453	0.047868	0.238695	0.22044													0.10466	0.517185	0.066811	0.064531									0.143611	0.057406	0.275649	0.076283
							0.131434	0.100604	0.302608	0.037194													0.057314	0.864547	0.066811	0.38425									0.085458	0.233449	0.274432	0.097896
							0.197151	0.043811	0.769563	0.051708													0.412409	0.328065	0.158368	0.048398									0.259915	0.081133	0.428989	0.13413
							0.076264	0.036509	0.359999	0.038101													0.056068	0.09456	0.225179	0.195058									0.185076	0.099503	0.250092	0.04577
							0.052736	0.280717	0.16826	0.032658													0.139546	0.071402	0.581506	0.083596									0.180019	0.039036	0.704638	0.065476
							0.066528	0.133057	0.033913	0.050801													0.14453	0.357497	0.168265	0.043998									0.121867	0.127823	0.863455	0.037155
							0.16551	0.284774	0.052174	0.066223													0.139546	1.76937	0.116301	0.092396									0.066243	0.224264	0.576854	0.258091
							0.109528	0.171189	0.130434	0.078016													0.160727	0.07005	0.123725	0.051331									0.093043	0.231918	0.280517	0.049097
							0.077076	0.176057	0.104348	0.056244													0.382506	0.084543	0.047015	0.120262									0.224012	0.251819	0.087623	0.120752
							0.120076	0.069774	0.035217	0.333836													0.37503	0.952923	0.212806	0.085063									0.075851	0.096441	0.448461	0.285294
							0.539529	0.079509	0.195652	0.071666													0.122103	0.39373	0.044541	0.071864									0.075851	0.134712	0.193502	0.195061
							0.051113	0.034887	0.074348	0.119745													0.453525	0.283824	0.051964	0.042532									0.061692	0.043628	0.049288	0.192408
							0.120887	0.06734	0.12	0.046265													0.241714	0.638905	0.123725	0.281588									0.21491	0.083429	0.382135	0.072982
							0.114396	0.036509	0.073043	0.124281													0.122103	0.067635	0.168265	0.083596									0.041971	0.065825	0.462457	0.106156
							0.164698	0.085189	0.050869	0.048987													1.67705	0.054349	0.054439	0.478113									0.129452	0.143897	0.122308	0.082934
							0.07383	0.034075	0.13826	0.112488													0.127087	0.160632	0.069286	0.043998									0.182547	0.065825	0.480712	0.082271
							0.505453	0.193095	0.373042	0.085273													0.108398	0.103867	0.17074	0.227324									0.039442	0.081133	0.085189	0.237524
							0.801585	0.226359	0.104348	0.044451													0.080987	0.99761	0.133623	0.459047									0.241711	0.117873	0.045637	0.048434
							0.369151	0.086811	0.061304	0.100695													0.057314	0.051934	0.086607	0.16426									0.039442	0.424035	0.839724	0.039145
							0.358604	1.4693	0.043043	0.06078													0.102168	0.605088	0.150944	1.04276									0.1962	0.037505	0.466716	0.176484
							0.217434	0.049491	0.044348	0.065316													0.414901	0.194449	0.131148	0.387184									0.046016	0.123996	0.599368	0.075636
							0.245019	0.071396	0.045652	0.117024													0.399949	0.097829	0.089082	0.167193									0.517807	0.205129	0.119265	0.17383
							0.223113	0.254755	0.108261	0.228605													0.355095	0.384068	0.103929	0.441448									0.440945	0.277077	0.363272	0.081607
							0.305868	0.062472	0.366521	0.040822													0.044854	0.077297	0.042066	0.283055									0.413639	0.039036	0.063284	0.190417
							0.533849	0.410529	0.088695	0.111581													0.067281	0.294693	0.212806	0.038132									0.158781	0.091083	0.111963	0.098858
							0.576038	0.051925	0.203478	0.047172													0.252927	0.204111	0.084133	0.067464									0.03742	0.165328	0.681515	0.063694
							0.068151	0.217434	0.136956	0.082552													0.042362	0.068842	0.700281	0.039598									0.259915	0.097972	0.924913	0.164542
							0.086	0.070585	0.092608	0.093438													0.452279	0.038648	0.042066	0.085063									1.08669	0.179871	0.089449	0.049097
							0.140359	0.120076	0.043043	0.098881													0.105906	0.178748	0.12125	0.051331									0.251319	0.448528	0.073019	0.143974
							0.050302	0.348057	0.032609	0.133353													0.123349	0.786252	0.103929	0.054264									0.096583	0.044394	0.052939	0.583194
							0.088434	0.895699	0.037826	0.039915													0.062297	0.073673	0.07176	0.288921									0.047027	0.053578	0.163685	0.078953
							0.072208	0.046245	0.046956	0.51799													0.660352	0.10266	0.205383	0.15986									0.066243	0.052048	0.038944	0.040472
							0.384566	0.670151	0.049565	0.038101													0.321455	0.227059	0.210332	0.140794									0.106697	0.180636	0.037727	0.065684
							0.083566	0.10466	0.130434	0.125188													0.225517	0.050726	0.074235	0.101196									0.078885	0.200537	0.124133	0.085588
							0.262868	0.129	0.139565	0.197761													0.634187	0.1401	0.183112	0.205325									0.065737	0.14007	0.225143	0.105492
							0.224736	0.096547	0.046956	0.116117													0.140792	0.137685	0.04949	0.055731									0.040454	0.1416	0.045637	0.06303
							0.214189	0.069774	0.06	0.039008													0.139546	0.17271	0.321684	0.117328									0.125991	0.120934	0.110138	0.114781
							0.183359	0.106283	0.06	0.066223													0.142038	0.12923	0.066811	0.149594									0.144328	0.041332	0.196544	0.43922
							0.195528	0.034075	0.086087	0.239491													0.064789	1.10872	0.084133	0.112929									0.100556	0.049751	0.219667	0.583194
							0.072208	0.186604	0.063913	0.143332													0.1844	0.192034	0.084133	0.272788									0.133089	0.059702	0.100402	0.871141
							0.069774	0.318849	0.079565	0.046265													0.109643	0.130438	0.277143	0.070397									0.045546	0.29162	0.062067	0.28264
							0.172	0.068151	0.03913	0.12791													0.110889	0.321264	0.084133	0.243456									0.257305	0.383469	0.054156	0.044453
							0.037321	0.035698	0.16826	0.135167													0.155744	0.106283	0.136097	0.417982									0.052053	0.465367	0.058416	0.358939
							0.075453	0.189038	0.06913	0.044451													0.135808	0.041064	0.131148	0.063064									0.062108	0.042097	0.090611	0.039808
							0.142793	0.068151	0.045652	0.074387													0.077249	0.297109	0.106403	0.130528									0.133089	0.261004	0.04058	0.050424
							0.547642	0.047057	0.057391	0.056244													0.038624	0.204111	0.076709	0.124661									0.059742	0.142366	0.054478	0.173167
							0.222302	0.298566	0.035217	0.072573													0.449787	0.213774	0.07176	0.074797									0.082219	0.180636	0.18011	0.039808
							0.164698	0.360227	0.206086	0.150589													0.142038	0.056765	0.284567	0.24639									0.111795	0.181401	0.112291	0.041135
							0.091679	0.033264	0.088695	0.039008													0.080987	0.07005	0.445409	0.529444									0.146694	0.055109	0.170104	0.042462
							0.043	1.04985	0.037826	0.100695													0.095938	0.064011	0.210332	0.101196									0.103514	0.052048	0.188448	0.368892
							0.034887	1.25187	0.053478	0.237676													0.225517	0.18358	0.054439	0.051331									0.118301	0.837355	0.440825	0.0763
							0.236095	0.538717	0.095217	0.045358													0.28283	0.07005	0.279618	0.095329									0.141962	0.117873	0.915003	0.345007
							0.45434	2.16866	0.110869	0.057151													0.038624	0.193242	0.207857	0.099729									0.324145	0.189821	0.041136	0.072319
							0.059226	0.037321	0.074348	0.158753													0.061051	0.08092	0.089082	0.199458									0.045546	0.137773	0.038913	0.237524
							0.055981	0.216623	0.078261	0.166918													0.049838	0.33455	0.079184	1.5634									0.093458	0.325298	0.097282	0.157907
							0.091679	0.186604	0.253043	0.520711													0.225517	0.285031	0.249924	0.104129									0.085768	0.041332	0.07171	0.061703
							0.032453	0.058415	0.045652	0.175989													0.210565	0.090582	0.09898	0.080663									0.045546	0.09338	1.14125	0.167195
							0.052736	0.051925	0.050869	0.043544													0.03987	0.11836	0.096505	0.08213									0.095824	0.13165	0.126744	0.075636
							0.136302	0.172811	0.049565	0.234955													0.080987	0.082128	0.059388	0.321186									0.269727	0.538846	0.055589	0.071655
							0.193906	0.081132	0.139565	0.046265													0.093446	0.333342	0.138572	0.065997									0.205844	0.349791	0.485296	0.075636
							0.072208	0.035698	0.224347	0.20774													0.059805	0.077297	0.12125	0.162793									0.473205	0.040567	0.060593	0.20634
							0.052736	0.070585	0.052174	0.160568													0.093446	0.294693	0.168265	0.131994									0.200521	0.039036	0.05281	0.167859
							0.236906	0.100604	0.185217	0.358329													0.058742	0.97587	0.04949	0.174526									0.123625	0.055875	0.098393	0.321785
							0.062472	0.460831	0.255651	0.372844													0.094372	0.216189	0.064337	0.15106									0.943452	0.174513	0.251264	0.129377
							0.135491	0.038943	0.305216	0.031751													0.116521	0.190826	0.039592	0.080663									0.049687	0.09338	0.649841	0.059049
							0.047868	0.267736	0.079565	0.04808													0.051038	0.061596	0.111352	0.362251									0.162073	0.212018	0.117294	0.374863
							0.190661	0.054359	0.031304	0.055337													0.07415	0.085751	0.232602	0.070397									0.068615	0.048986	1.54539	0.78489
							0.034075	0.073019	0.037826	0.473539													0.079928	0.228267	0.230128	0.692237									0.120667	0.111749	0.048919	0.168522
							0.034887	0.605246	0.79565	0.355608													0.105928	0.10266	0.41324	0.114395									0.264403	0.042097	0.853854	0.094877
							0.03083	0.090057	0.199565	0.3547													0.10015	0.333342	0.168265	0.178926									0.133089	0.04669	0.129524	1.20885
							0.129	0.619038	0.296086	0.035379													0.158892	0.228267	0.116301	0.117328									0.805631	0.181401	0.672633	0.161224
							0.038132	0.118453	0.277825	0.152403													0.369786	0.073673	0.108878	0.041065									0.068023	0.115576	0.058925	0.102839
							0.056792	0.043	0.12913	0.059873													0.102076	0.10266	0.113827	0.038132									0.162664	0.06659	0.240702	0.232216
							0.051113	0.236906	0.061304	0.036286													0.213782	0.044687	0.202908	0.104129									0.091092	0.078837	0.233476	0.180465
							0.047057	0.052736	0.165652	0.031751													0.345711	0.05918	0.089082	0.70397									0.045546	0.059702	1.80944	0.180465
							0.051925	0.095736	0.116087	0.366493													0.392897	0.229474	0.195485	0.429715									0.547735	0.077306	0.99116	0.112127
							0.238529	0.086	0.164347	0.041729													0.081854	0.041064	0.116301	0.046931									0.062108	0.052813	0.314081	0.208331
							0.047057	0.10466	0.271304	0.050801													0.04526	1.25849	0.051964	0.042532									0.192831	0.123231	0.107288	0.256101
							0.216787	0.129811	0.213912	0.320228													0.232079	0.086959	0.131148	0.087996									0.234828	0.306163	0.303519	0.090896
							0.056513	0.039755	0.123913	0.051708													0.31297	0.597841	0.07176	0.118795									0.054419	0.130885	0.354105	0.06104
							0.060219	1.62264	0.173478	0.031751													0.200301	0.214981	0.091556	0.153993									0.23187	0.114046	0.089499	0.167195
							0.060219	0.129811	0.043043	0.346536													0.066446	0.708955	0.126199	0.104129									0.729919	0.14007	0.168992	0.136676
							0.060219	0.036509	0.041739	0.289385													0.224375	0.729487	0.037117	0.063064									0.137229	0.055875	0.110067	0.699302
							0.069483	0.146038	0.06	0.034472													0.043334	0.072466	0.047015	0.244923									0.051461	0.173747	0.039469	0.722523
							0.047249	0.142793	0.12	0.077109													0.039482	0.049518	0.039592	0.045465									0.120667	0.150785	0.07964	0.252784
							0.058366	0.10466	0.057391	0.087088													0.641347	0.083335	0.252398	0.071864									0.108246	0.256411	0.078302	0.758351
							0.06763	0.090868	0.127826	0.106138													0.146374	0.119568	0.059388	0.239057									0.099373	0.042097	0.036808	0.131368
							0.081527	0.030019	0.036522	0.095252													0.076076	0.213774	0.324158	0.199458									0.150243	0.172217	0.339307	0.090232
							0.055587	0.227981	0.071739	0.034472													0.117484	0.037134	0.247449	0.096796									0.088134	0.058171	0.040155	0.197715
							0.050954	0.063283	0.086087	0.147867													0.136744	0.070024	0.051964	0.272788									0.050278	0.083429	0.102394	0.388132
							0.034278	0.030019	0.075652	0.052615													0.049112	0.21856	0.039592	0.123195									0.068615	0.112515	0.119126	0.222264
							0.069483	0.054359	0.071739	0.343814													0.07415	1.11826	0.061862	0.180392									0.055602	0.042097	0.044839	0.046443
							0.057439	0.270981	0.076956	0.043544													0.065483	0.128908	0.306837	0.140794									0.062108	0.197475	0.058224	0.108146
							0.095424	0.094925	0.046956	0.096159													0.240746	0.364444	0.091556	0.065997									0.067432	0.052048	1.71327	0.183782
							0.1121	0.034887	0.080869	0.065316													0.081854	1.42966	0.059388	0.048398									0.223589	0.051282	0.104402	0.102175
							0.060219	0.135491	0.29739	0.172361													0.260969	0.832863	0.200434	0.130528									0.060334	0.070417	0.062909	0.067011
							0.107467	0.209321	0.078261	0.200483													0.037556	0.520406	0.118776	0.225857									0.066249	0.053578	0.31053	0.5195
							0.101909	0.034075	0.037826	0.12791													0.618236	0.159676	0.074235	0.601308									0.379747	0.078837	0.231559	0.228235
							0.090791	0.194717	0.097826	0.360143													0.225338	0.07692	0.267245	0.048398									0.134272	0.071183	0.036808	0.167859
							0.105614	0.051925	0.048261	0.139703													0.060668	0.390968	0.212806	0.079197									0.740566	0.068121	0.285098	0.090232
							0.238096	0.146849	0.24913	0.038101													0.041408	1.79729	0.235077	0.054264									0.167988	0.055875	0.091687	0.070992
							0.077821	0.033264	0.066522	0.097973													0.402527	0.073738	0.081658	0.142261									0.04732	0.08496	0.996506	0.326429
							0.065777	0.074642	0.082174	0.034472													1.41944	2.07897	0.039592	0.107062									0.081628	0.052813	0.037478	0.096204
							0.128775	0.242585	0.153913	0.035379													0.07415	0.203176	0.14847	0.290388									0.063291	0.045924	0.066255	0.047107
							0.084306	0.11034	0.369129	0.184154													0.58742	0.183548	0.09898	0.038132									0.089909	0.048986	0.143218	0.052414
							0.233463	0.151717	0.211304	0.070759													0.368823	0.129439	0.037117	0.139327									0.058559	0.047427	0.373439	0.244158
							0.125996	0.068962	0.035217	0.20139													0.042371	0.307682	0.039592	0.058664									0.064474	0.071606	0.189396	0.118098
							0.08338	0.035698	0.108261	0.345629													0.041408	0.096548	0.113827	0.045465									0.073938	0.046497	0.093025	0.135349
							0.124143	0.043	0.153913	0.069851													0.509418	0.244554	0.09898	0.079197									0.37324	0.079045	0.093694	0.132031
							0.042616	0.064906	0.232173	0.19504													0.546975	0.249328	0.131148	0.064531									0.369691	0.038128	0.261006	0.053741
							0.082453	0.030019	0.088695	0.047172													0.287932	1.1798	0.042066	0.095329									0.037856	0.091134	0.037478	0.205014
							0.08338	0.501397	0.088695	0.120653													0.363045	0.129969	0.047015	0.101196									0.178635	0.042777	1.54194	0.043789
							0.033352	0.129811	0.213912	0.132446													0.256154	0.19628	0.086607	0.265455									0.555424	0.053007	0.163965	0.072982
							0.136187	0.039755	0.199565	0.06078													0.050075	0.094957	0.329107	0.492779									0.043771	0.110663	0.125818	0.048434
							0.072262	0.309113	0.096521	0.229512													0.369786	0.067372	0.076709	0.40185									0.059151	0.121823	0.071609	0.062367
							0.238096	0.049491	0.109565	0.105231													0.047186	0.5899	0.037117	0.349052									0.059742	0.048357	1.23676	0.037155
							0.043543	0.387	0.076956	0.378287													1.04676	0.057774	0.037117	0.042532									0.079262	0.202728	0.248959	0.050424
							0.077821	0.068151	0.056087	0.044451													0.037556	0.090513	0.178163	0.368118									0.101148	0.078115	0.497249	0.111464
							0.088938	0.582529	0.06	0.046265													0.052964	0.070773	0.037117	0.039598									0.039631	0.063236	0.297145	0.062367
							0.204744	0.068151	0.080869	0.034472													0.159526	0.216653	0.079184	0.058664									0.088726	0.061376	0.043501	0.129377
							0.601261	0.383755	0.193043	0.123374													0.49147	0.114585	0.111352	0.206791									0.044363	0.17018	0.15995	0.073646
							0.310358	0.263679	0.036522	0.124281													0.061232	0.337979	0.084133	0.07333									0.100556	0.223186	0.055547	0.118762
							0.071336	0.06166	0.146087	0.032658													0.523697	0.038998	0.183112	0.142261									0.041405	0.068816	1.69252	0.169186
							0.094497	0.481925	0.15	0.069851													0.09346	1.41402	0.079184	0.149594									0.173903	0.085555	1.84845	0.053078
							0.044469	0.340755	0.031304	0.071666													0.088626	0.481451	0.180638	0.127595									0.097007	0.090204	0.04417	0.079617
							0.245507	0.11034	0.135652	0.105231													0.204645	0.830503	0.054439	0.057198									0.105288	0.054867	0.064917	0.043126
							0.032425	0.034887	0.049565	0.223162													0.157915	0.357237	0.274669	0.060131									0.081628	0.061376	0.036808	0.06104
							0.095424	0.096547	0.092608	0.034472													0.087014	0.163212	0.111352	0.137861									0.057376	0.227836	0.223528	0.20435
							0.078748	0.590642	0.083478	0.031751													0.049953	0.076551	0.274669	0.129061									0.120667	0.32734	0.117118	0.084261
							0.156569	0.804831	0.118695	0.422738													0.075735	0.234948	0.04949	0.061597									0.043771	0.078115	0.080309	0.070992
							0.284418	0.447038	0.091304	0.116117													0.712228	0.430899	0.158368	0.049865									0.132497	0.119963	0.275729	0.080944
							0.673523	0.286396	0.053478	0.046265													0.074123	0.038516	0.089082	0.117328									0.055602	0.069746	0.077632	0.297236
							0.181583	0.041377	0.079565	0.042637													0.072512	0.067403	0.348903	0.06893									0.081036	0.037198	0.447056	0.17184
							0.266815	0.734246	0.043043	0.229512													0.165972	0.217134	0.150944	0.039598									0.076896	0.063236	0.104402	0.057722
							0.610525	0.143604	0.053478	0.288478													0.061232	0.106882	0.296939	0.156927									0.047912	0.130192	1.89999	0.044453
							0.079674	0.734246	0.067826	0.117931													0.154692	0.28213	0.240026	0.196525									0.057968	0.053937	0.075625	0.075412
							0.228831	1.0677	0.061304	0.171454													0.049953	1.82518	0.326633	0.102662									0.052053	0.289212	0.742862	0.113464
							0.060219	0.211755	0.031304	0.066223													0.120853	0.316795	0.059388	0.083596									0.170941	0.064166	0.064248	0.038052
							0.035205	0.404038	0.044348	0.103417													0.223981	1.778	0.044541	0.063064									0.107227	0.411035	0.293799	0.040128
							0.264036	0.05517	0.09	0.139703													0.489859	0.220505	0.128674	0.139327									0.041958	0.098574	0.051532	0.05604
							0.037058	0.051925	0.199565	0.048987													0.228816	0.178618	0.059388	0.120262									0.039886	0.060446	0.212151	0.112772
							0.382621	0.655548	0.176086	0.059873													0.062844	0.095809	0.037117	0.261056									0.094795	0.335709	1.18992	0.076104
							0.137113	0.234472	0.032609	0.155125													0.103128	0.061626	0.037117	0.095329									0.211346	0.042777	0.036808	0.116923
							0.030573	0.120887	0.087391	0.032658													0.09346	0.241688	0.123725	0.064531									0.359495	0.251085	0.040824	0.325172
							0.056513	0.59551	0.123913	0.064103													0.302939	0.241207	0.037117	0.08213									0.058534	0.132052	0.086333	0.065034
							0.419678	0.031642	0.380868	0.037112													0.056398	1.12997	0.145995	0.063064									0.131573	0.605393	0.12448	0.038052
							0.163054	0.378887	0.070435	0.053981													0.111185	0.181507	0.111352	0.136394									0.051282	0.172039	0.038147	0.040128
							0.033352	0.060038	0.116087	0.036437													0.188531	0.076069	0.051964	0.051331									0.067341	0.387786	0.260336	0.138371
							0.037984	0.077887	0.071739	0.051957													0.177251	0.062589	0.059388	0.412116									0.053354	0.072536	0.311868	0.138371
							0.294609	0.038132	0.050869	0.034413													0.615546	0.037072	0.145995	0.123195									0.040922	0.292002	0.07964	0.06711
							0.616084	0.504642	0.065217	0.076923													0.217536	0.542595	0.123725	0.043998									0.134163	0.173899	0.042162	0.696698
							0.062998	0.054359	0.057391	0.110661													0.120853	0.065192	0.059388	0.096796									0.261074	0.140421	0.067594	0.336241
							0.032425	0.403227	0.086087	0.041835													0.357726	0.214464	0.054439	0.041065									0.090651	0.171109	0.058224	0.039436
							0.030573	0.233661	0.225652	0.140351													0.415735	0.235179	0.037117	0.212658									0.219634	0.141351	0.338638	0.348695
							0.072262	0.161453	0.093913	0.24494													0.075735	0.049351	0.314261	0.071864									0.324789	0.066026	0.042162	0.071261
							0.073189	0.043811	0.436955	0.04386													0.136967	0.615366	0.160842	0.055731									0.052836	0.109733	0.042162	0.058116
							0.056513	0.172811	0.100435	0.049933													0.038673	0.113934	0.150944	0.101196									0.066823	1.00527	0.120464	0.252527
							0.156569	0.129	0.056087	0.040486													0.112796	0.215683	0.133623	0.08213									0.047656	0.472411	0.153257	0.174347
							0.177877	0.086	0.048261	0.109312													0.185308	0.089563	0.113827	0.153993									0.323235	0.099504	0.220182	0.091325
							0.519734	1.44172	0.048261	0.037112													0.049953	0.051179	0.180638	0.153993									0.413885	0.049287	0.059563	0.044971
							0.032425	0.034075	0.061304	0.048583													0.04673	0.086517	0.210332	0.187725									0.042994	0.281773	2.20315	0.412345
							0.048175	0.048679	0.09	0.045209													0.070901	0.072504	0.150944	0.043998									0.107227	0.202728	0.219512	0.039436
							0.056513	0.205264	0.045652	0.041161													0.053175	0.171206	0.069286	0.126128									0.073039	0.043707	0.45174	0.740976
							0.31777	0.094113	0.623476	0.10189													0.045119	0.070066	0.094031	0.096796									0.038332	0.590514	0.192073	0.26844
							0.125996	0.467321	0.13826	0.049258													0.049953	0.91391	0.222704	0.07773									0.357941	0.345939	0.098379	0.145981
							0.037058	0.220679	0.041739	0.072875													0.054787	0.500823	0.042066	0.063064									0.204094	0.084625	0.037478	0.399892
							0.365018	0.133868	0.104348	0.068151													0.207868	0.065192	0.361276	0.046931									0.19995	0.037198	0.098379	0.03736
							0.091718	0.707472	0.041739	0.324562													0.127299	0.129775	0.042066	0.127595									0.113961	0.133912	0.047516	0.220702
							0.194553	0.537095	0.031304	0.125506													0.190142	0.045086	0.04949	0.041065									0.23362	0.044637	0.043501	0.137679
							0.147304	0.749661	0.067826	0.102564													0.159526	0.11759	0.056913	0.092396									0.174567	0.15902	0.150519	0.047046
							0.193626	0.054359	0.035217	0.078947													0.293271	0.17608	0.116301	0.442915									0.096349	0.130192	0.146384	0.060883
							0.138966	0.035698	0.056087	0.056005													0.038673	0.065192	0.185587	0.045465									0.124321	0.575634	0.141835	0.233847
							0.034278	0.076264	0.041739	0.337382													0.103128	0.32718	0.128674	0.105596									0.412849	0.042777	0.052516	0.094784
							0.231611	0.763453	0.083478	0.079622													0.045119	3.44422	0.039592	0.061597									0.061124	0.057656	0.047554	0.079563
							0.227905	0.06734	0.035217	0.067476													0.517252	0.187047	0.039592	0.098262									0.088061	1.39584	0.060373	0.040128
							0.371503	0.107906	0.329999	0.056005													0.125687	1.35015	0.037117	0.101196									0.140379	0.092064	0.039284	0.071261
							0.061145	0.602812	0.050869	0.096491													0.053175	0.070066	0.103929	0.148127									0.055944	1.39956	0.138114	0.703616
							0.211229	0.147661	0.27913	0.061404													0.101517	0.332054	0.205383	0.049865									0.180783	0.624921	0.237357	0.121766
							0.031499	0.199585	0.036522	0.154521													0.070901	0.291842	0.09898	0.070397									0.309767	0.523558	0.044246	0.054657
							0.04169	0.034075	0.044348	0.053981													0.141801	0.204107	0.074235	0.214124									0.039886	0.077185	0.048795	0.271207
							0.091718	0.047868	0.078261	0.053981													0.098294	0.104186	0.150944	0.134928									0.130537	0.32176	0.06947	0.211016
							0.361312	0.825925	0.12913	0.036437													0.335166	0.080424	0.173214	0.193592									0.052318	0.078115	0.105446	0.479455
							0.168612	0.112774	0.065217	0.242915													0.203033	0.180345	0.07176	0.096796									0.25952	0.554246	0.085184	0.040128
							0.500279	0.070585	0.209999	0.030364													0.077346	0.842625	0.126199	0.060131									0.19995	0.508679	0.049208	0.047046
							0.071336	0.057604	0.03913	0.041835													0.457631	1.19539	0.136097	0.108529									0.042476	0.261314	0.039284	0.038744
							0.207523	0.107094	0.16826	0.053981													0.729954	0.053007	0.128674	0.060131									0.071485	0.174829	0.395733	0.08579
							0.570688	0.16551	0.091304	0.054656													0.472133	0.358253	0.09898	0.22879									0.039368	0.056726	0.041351	0.051889
							0.08338	0.141981	0.037826	0.122807													0.146635	0.375922	0.145995	0.108529									0.205648	0.090204	0.06823	0.12315
							0.059292	0.137113	0.066522	0.192308													0.517252	0.442942	0.207857	0.074797									0.154883	0.091134	0.038043	0.080255
							0.037058	0.063427	0.03913	0.051957													0.823413	0.098702	0.155893	0.096796									0.140379	0.117173	0.667826	0.280893
							0.037984	0.49345	0.061304	0.039136													0.107962	0.120636	0.089082	0.038132									0.167833	0.366397	0.081462	0.038052
							0.110247	0.146056	0.057391	0.103914													0.045119	0.096874	0.126199	0.133461									0.107745	0.517978	0.089733	0.046354
							0.094497	0.135	0.108261	0.20108													0.523697	0.263206	0.103929	0.057198									0.106709	0.191568	0.105446	0.141138
							0.306652	0.16875	0.096521	0.093792													0.407678	0.043258	0.079184	0.104129									0.047138	0.600743	0.095108	0.096168
							0.123217	0.167587	0.040435	0.14305													0.049953	0.101749	0.09898	0.291854									0.045584	0.055797	1.39975	0.054657
							0.034278	0.129763	0.088695	0.117409													0.688058	0.045086	0.066811	0.231724									0.041958	0.053937	0.066162	0.096168
							0.053734	0.057026	0.031304	0.077598													0.051564	1.4781	0.04949	0.115862									0.080809	0.053937	0.163752	0.069185
							0.048175	0.037823	0.067826	0.049933													0.660664	0.90538	0.143521	0.316787									0.313393	0.076255	0.781129	0.057424
							0.050954	0.047716	0.092608	0.20108													0.072512	0.112106	0.106403	0.15986									0.176639	0.822999	0.175744	0.063651
							0.228831	0.047716	0.03913	0.045209													0.096683	0.074941	0.051964	0.085063									0.133127	0.605393	0.805526	0.09686
							0.113952	0.037241	0.178695	0.095817													0.078957	0.179126	0.084133	0.085063									0.19736	0.053937	1.35591	0.03736
							0.305726	0.056444	0.084782	0.0722													0.054787	0.257113	0.183112	0.048398									0.616943	0.139491	0.186495	0.35077
							0.086159	0.282802	0.117391	0.031039													0.141801	0.037166	0.09898	0.055731									0.297852	0.839738	0.093041	0.040128
							0.088012	0.093104	0.035217	0.046559													0.083792	0.069457	0.160842	0.127595									0.578611	0.039058	0.056238	0.29473
							0.033352	0.060517	0.217825	0.267882													0.111185	0.039603	0.158368	0.090929									0.105673	0.573775	0.272506	0.103086
							0.143599	0.10125	0.091304	0.074224													0.35128	0.040824	0.230128	0.118795									0.376589	0.404525	1.2025	0.244917
							0.095424	0.928127	0.031304	0.038462													0.518863	0.07109	0.225179	0.183326									0.061642	0.314321	0.92255	0.067802
							0.151937	0.239742	0.035217	0.199056													0.947489	0.050678	0.081658	0.103882									0.063197	0.32455	0.521028	0.065034
							0.084306	0.211229	0.048261	0.063428													0.294882	0.091502	0.185587	0.067749									0.136753	0.174829	0.054997	1.16716
							0.053734	0.233923	0.040435	0.108637													0.185308	0.038009	0.047015	0.143402									0.221188	0.200868	0.197246	0.054657
							0.053734	0.135	0.050869	0.094467													0.083792	0.073202	0.136097	0.085815									0.070449	0.142281	0.056238	0.158435
							0.09635	0.258363	0.052174	0.187585													0.680001	0.292103	0.118776	0.03952									0.065787	0.149721	0.07526	0.224161
							0.057524	0.15944	0.045652	0.087045													0.182086	0.057717	0.299414	0.095978									0.068895	0.086485	0.039697	0.292655
							0.046363	0.095431	0.044348	0.0722													0.201422	0.511004	0.163317	0.124207									0.101529	0.341289	0.141008	0.058116
							0.033484	0.41082	0.058695	0.074224													0.038673	0.086575	0.084133	0.164856									0.399381	0.081835	0.050449	0.520967
							0.039494	0.238578	0.096355	0.141026													0.061232	0.170335	0.185587	0.060974									0.082881	0.066956	0.163752	0.140447
							0.065252	0.549312	0.07323	0.092443													0.162749	0.085167	0.103929	0.07904									0.039368	0.064166	0.688501	0.317561
							0.036919	0.046552	0.096355	0.10054													0.037062	0.05279	0.059388	0.098236									0.091687	0.281773	0.199314	0.089249
							0.191462	0.041897	0.047535	0.050607													0.048341	0.703863	0.074235	0.057587									0.103601	1.02201	0.038457	0.042203
							0.047222	0.050043	0.060382	0.0722													0.040284	1.65197	0.319209	0.082428									0.191662	0.044637	1.37287	0.052581
							0.10818	0.10416	0.074514	0.045884													0.056398	0.730609	0.066811	0.041779									0.219116	0.182269	0.60125	0.163278
							0.206058	0.658127	0.078369	0.11471													0.075735	0.902352	0.183112	0.041779									0.129501	0.979229	0.246455	0.044971
							0.080706	0.132673	0.068091	0.071525													0.075735	0.128807	0.094031	0.110657									0.111889	0.150651	0.250278	0.05604
							0.141665	0.059354	0.163161	0.041835													0.075735	0.608841	0.054439	0.074524									0.357941	0.183199	0.051652	0.536879
							0.314238	0.064591	0.057813	0.23077													0.150094	1.03186	0.066811	0.091461									0.136235	0.051147	0.218817	0.065034
							0.097019	0.508579	0.051389	0.084346													0.039755	1.61044	0.039592	0.038391									0.045584	0.043707	0.052591	0.065034
							0.467064	0.185625	0.087362	0.068151													0.059226	0.207639	0.054439	0.110657									0.105155	0.071606	0.109878	0.061575
							0.113332	0.499268	0.11948	0.060729													0.097359	0.556755	0.047015	0.360199									0.05957	0.294792	0.090156	0.085098
							0.333985	0.095431	0.052674	0.038462													0.051925	0.430764	0.155893	0.055328									0.573949	0.058586	0.157773	0.401968
							0.080706	0.118125	0.077084	0.116734													0.053547	0.60673	0.096505	0.219055									0.140897	0.043707	0.147913	0.326555
							0.255855	0.337501	0.173439	0.089069													0.137113	0.057013	0.111352	0.057587									0.065269	0.388716	0.072782	0.062267
							0.165705	0.040733	0.032118	0.190284													0.044623	0.468069	0.145995	0.169373									0.075111	0.048357	0.091565	0.040128
							0.037777	0.109397	0.041111	0.072875													0.124944	0.100652	0.091556	0.058716									0.0518	0.64631	0.117861	0.853749
							0.061817	0.044224	0.037257	0.111336													0.047868	0.067571	0.165791	0.241638									0.109817	0.32455	0.091095	0.051889
							0.031767	0.5336	0.035972	0.128205													0.068151	0.038009	0.106403	0.041779									0.075629	0.073465	0.054939	0.06711
							0.064393	0.36776	0.030834	0.161269													0.267736	0.078129	0.042066	0.229217									0.25175	0.368257	0.077008	0.063651
							0.164846	0.379398	0.047535	0.031039													0.151717	0.040824	0.037117	0.093719									0.040922	0.072536	1.27581	0.237998
							0.762413	0.03666	0.050104	0.159245													0.142793	0.354043	0.037117	0.120819									0.116033	0.375697	0.138991	0.080947
							0.231815	0.101832	0.037257	0.087045													0.039755	0.170335	0.056913	0.060974									0.152811	0.087415	0.054	0.094092
							0.100453	0.243233	0.04625	0.080972													0.053547	0.327296	0.113827	0.552154									0.075111	0.059516	0.042261	0.199254
							0.115049	0.794291	0.051389	0.117409													0.069774	0.130215	0.126199	0.642486									0.042476	0.110663	0.059635	0.087866
							0.036919	0.100668	0.04625	0.063428													0.072208	0.394867	0.163317	0.040649									0.089615	0.044637	0.137113	1.33459
							0.044646	0.050043	0.100209	0.103914													0.043	1.55483	0.126199	0.197601									0.114849	0.101364	0.352173	0.406119
							0.074696	0.158858	0.035972	0.41498													0.043	0.159073	0.452832	0.05307									0.058398	0.115313	0.138052	0.19787
							0.112473	0.264764	0.080938	0.353577													0.060849	0.064051	0.126199	0.115173									0.171689	0.113453	0.460172	0.053965
							0.171715	0.204828	0.147744	0.040486													0.158208	0.073202	0.106403	0.277771									0.085261	0.071606	0.083113	0.096168
							0.09616	0.073319	0.092501	0.083671													0.141981	0.722867	0.037117	0.102753									0.572687	0.063236	0.066208	0.052581
							0.082423	0.203082	0.07323	0.053981													0.075453	0.04012	0.086607	0.102753									0.434089	0.055797	0.25873	0.050505
							0.033484	0.034914	0.035972	0.136303													0.199585	0.138661	0.04949	0.142273									0.049833	0.093924	0.600572	0.090633
							0.196613	0.155949	0.043681	0.132254													0.123321	0.118249	0.301888	0.048553									0.126918	0.101364	0.069495	0.060191
							0.052373	0.095431	0.089931	0.078273													0.073019	0.261837	0.089082	0.110657									0.638871	0.300371	0.124904	0.258754
							0.490245	0.03375	0.065521	0.08637													0.06166	0.086575	0.089082	0.048553									0.054505	0.058586	0.073722	0.079563
							0.350298	0.133837	0.227397	0.045884													0.146849	0.347617	0.123725	0.065491									0.180254	0.047427	0.10753	0.069185
							0.097019	0.101832	0.059098	0.031039													0.085189	0.244091	0.207857	0.306									0.084871	0.045567	0.972467	0.060191
							0.19833	0.052371	0.056528	0.156545													0.189849	0.236951	0.26972	0.272125									0.215682	0.060446	1.0814	0.062267
							0.230956	0.064357	0.033403	0.211201													0.059226	0.089247	0.094031	0.117432									0.041268	0.066035	0.509946	0.219318
							0.297066	0.120089	0.100209	0.067476													0.155774	0.082553	0.12125	0.150177									0.119521	0.041272	0.389738	0.116923
							0.079847	0.050424	0.04625	0.065452													0.091679	0.153059	0.123725	0.100494									0.105505	0.087046	0.088748	0.14183
							0.433579	0.12606	0.079653	0.061404													0.060849	0.153059	0.118776	0.26535									0.780972	0.090798	0.131478	0.047738
							0.250703	0.214302	0.102778	0.089069													0.176057	0.089247	0.284567	0.058716									0.664176	0.05703	0.049774	0.054657
							0.345146	0.222264	0.034688	0.242915													0.16551	0.240074	0.118776	0.042908									0.266293	0.126067	0.10753	0.361148
							0.907512	0.382161	0.089931	0.228071													0.066528	0.217763	0.054439	0.048553									0.380364	0.050277	0.209895	0.045662
							0.064393	0.277996	0.213265	0.080972													0.170378	0.14458	0.091556	0.077911									0.149887	0.127568	1.10394	0.06711
							0.087574	0.325766	0.044966	0.313091													0.037321	0.128069	0.145995	0.121948									0.04594	0.145578	0.217408	0.047046
							0.118483	0.048434	0.091216	0.063428													0.058415	0.799653	0.155893	0.059845									0.105116	0.072789	0.259669	0.041059
							0.079847	0.461778	0.042396	0.830635													0.057604	0.042839	0.056913	0.287933									0.05139	0.0938	0.128661	0.044943
							0.252421	0.058386	0.220974	0.202429													0.096547	0.859895	0.054439	0.064362									0.050222	0.059282	0.144626	0.064362
							0.073837	0.352968	0.101494	0.047234													0.262868	0.429724	0.101454	0.099365									0.200499	0.051778	0.0972	0.083782
							0.394085	0.122743	0.065521	0.033063													0.134679	0.04864	0.101454	0.481018									0.645878	0.078042	0.089217	0.050491
							0.219795	0.441874	0.28521	0.110661													0.096547	0.146811	0.04949	0.181793									0.050222	0.042022	0.04273	0.167564
							0.049797	0.042462	0.097639	0.139002													0.222302	0.17537	0.09898	0.246155									0.03971	0.051778	0.087808	0.197526
							0.54777	0.057722	0.044966	0.091093													0.051925	1.66223	0.210332	0.093719									0.877522	0.085546	0.273286	0.064917
							0.042929	0.58253	0.043681	0.072875													0.133057	0.274881	0.081658	0.068878									0.160399	0.084045	0.222104	0.058259
							0.119342	0.041799	0.077084	0.093118													0.138736	2.37308	0.047015	0.074524									0.111345	0.043523	0.382225	0.048827
							0.073837	0.185773	0.128473	0.112686													0.175245	1.32576	0.039592	0.054199									0.5248	0.03677	0.461581	0.048272
							0.062676	0.274015	0.078369	0.088394													0.371585	0.309687	0.044541	0.632324									0.129254	0.097552	0.500085	0.066027
							0.042929	0.193734	0.086077	0.0722													0.198774	0.23115	0.051964	0.502472									0.10862	0.107307	0.046956	0.099318
							0.056666	0.31515	0.133612	0.056005													0.090057	0.09951	0.200434	0.051941									0.170521	0.05628	1.45424	0.095434
							0.052373	0.062367	0.056528	0.104589													0.089245	0.089247	0.064337	0.250671									0.282255	0.042022	0.086869	0.03773
							0.443882	0.130704	0.246668	0.165992													0.043811	0.207499	0.155893	0.108398									0.073192	0.123816	0.399129	0.048827
							0.058383	1.24733	0.059098	0.076923													0.520057	0.063365	0.150944	0.232605									0.059631	0.062283	0.54939	0.49215
							0.321965	0.355622	0.047535	0.118084													0.476246	0.356988	0.202908	0.040649									0.100431	0.107307	1.19833	0.132609
							0.050656	0.190417	0.032118	0.077598													0.076264	0.408751	0.126199	0.046295									0.052308	0.109558	0.565355	0.081563
							0.076413	0.48699	0.052674	0.099865													0.18417	0.103527	0.103929	0.073395									0.055446	0.164337	0.197217	0.159241
							0.073837	0.34368	0.030834	0.458165													0.217434	0.844723	0.123725	0.213409									0.316986	0.426227	0.158243	0.061588
							0.173432	0.51751	0.068091	0.176788													0.133057	0.215532	0.133623	0.126465									0.387079	0.469	0.084521	0.203629
							0.040353	0.433249	0.055243	0.061404													0.166321	0.091032	0.108878	0.220184									0.314371	0.137323	0.512294	0.113744
							0.061817	0.570588	0.034688	0.053981													0.079509	0.389117	0.07176	0.280029									0.115601	0.03752	0.107061	0.047717
							0.135655	0.434576	0.04625	0.37247													0.094925	0.090139	0.113827	0.237122									0.238001	0.13057	0.086869	0.072685
							0.064393	1.11198	0.625663	0.059379													0.140359	0.076752	0.07176	0.06662									0.084216	0.076541	0.079826	0.141486
							0.047222	0.128714	0.04882	0.150473													0.068151	1.34094	0.279618	0.048553									0.069047	0.0938	0.942884	0.461634
							0.161412	0.081607	0.125904	0.062078													0.050302	0.112005	0.158368	0.05307									0.142801	0.053278	0.068556	0.043833
							0.04207	0.390786	0.33403	0.039811													0.129	0.047747	0.061862	0.381653									0.467633	0.051027	2.62721	0.128725
							0.060959	0.131368	0.19014	0.224697													0.138736	0.049978	0.059388	0.085815									0.078985	0.03752	0.177965	0.196971
							0.055807	0.092223	0.296773	0.037112													0.076264	0.047747	0.069286	0.120819									0.126062	0.127568	0.073722	0.132054
							0.051514	0.088906	0.145175	0.060054													0.077887	0.038822	0.086607	0.07904									0.795604	0.141075	0.072313	0.107641
							0.141665	0.39344	0.075799	0.076923													0.037321	0.224456	0.235077	0.138885									0.275663	0.089298	0.103774	0.31238
							0.044646	0.673426	0.154168	0.110661													0.176868	0.059349	0.334056	0.044037									0.342094	0.11181	0.047426	0.263553
							0.196613	0.044453	0.04625	0.34413													0.181736	0.055333	0.141046	0.215668									0.074277	0.369947	0.048835	0.256895
							0.069544	1.04829	0.053959	0.311741													0.107094	0.069166	0.326633	0.185181									0.168955	0.098302	0.197217	0.207513
							0.045504	0.447845	0.068091	0.038462													0.052736	0.101742	0.116301	0.103882									0.043939	0.123066	0.496798	0.208623
							0.039569	0.114118	0.146459	0.043185													0.277472	0.052656	0.037117	0.09259									0.689419	0.276897	0.063861	0.061033
							0.080884	0.031183	0.038542	0.089069													0.099793	0.084957	0.111352	0.143402									0.340525	0.071288	0.060574	0.264108
							0.074483	0.037818	0.051389	0.071525													0.147661	0.12569	0.079184	0.481018									0.075847	0.128318	0.084052	0.125951
							0.148966	0.083598	0.102778	0.068151													0.131434	0.043642	0.200434	0.254059									0.150124	0.09305	0.047426	0.408923
							0.054117	0.321785	0.050104	0.163293													0.092491	0.523708	0.343954	0.163727									0.23277	0.155333	0.051182	0.040504
							0.038987	0.359603	0.123334	0.060054													0.146038	0.05528	0.074235	0.267609									0.093631	0.142576	0.354521	0.042723
							0.033168	0.250793	0.041111	0.040486													0.300189	0.086121	0.066811	0.203247									0.409571	0.081794	0.589303	0.268547
							0.068082	0.368228	0.051389	0.271255													0.320472	0.052953	0.155893	0.095978									0.047077	0.194353	0.143217	0.392833
							0.034914	0.199706	0.042396	0.037112													0.161453	0.149548	0.089082	0.719268									0.038185	0.086296	0.314608	1.02536
							0.052371	0.074309	0.084792	0.146424													0.422698	0.050625	0.09898	0.098236									0.256309	0.087046	0.125374	0.114299
							0.073319	0.196388	0.138751	0.0722													0.329396	0.047716	0.04949	0.047424									0.065908	0.270894	0.046487	0.143706
							0.036078	0.233543	0.041111	0.111336													0.175245	0.291531	0.054439	0.195343									0.037139	0.596567	0.128661	0.322922
							0.03666	0.270034	0.050104	0.190284													0.069774	0.086703	0.497373	0.222443									0.138093	0.248382	0.042261	0.095434
							0.050043	0.122743	0.071945	0.159919													0.227981	0.050625	0.069286	0.037262									0.281417	0.609324	0.073722	0.090995
							0.43526	0.323775	0.034688	0.045884													0.912736	0.073901	0.037117	0.189697									0.108703	0.051778	0.045548	0.064917
							0.103578	0.215629	0.062952	0.033063													0.066528	0.207738	0.136097	0.339874									0.091539	1.18038	0.065739	0.372858
							0.038405	0.112791	0.122049	0.073549													0.118453	0.085539	0.128674	0.093719									0.048312	0.275397	0.115982	0.087666
							0.494613	0.092223	0.034688	0.123482													0.142793	0.070992	0.091556	0.190826									0.048312	0.039771	0.153547	0.041614
							0.186789	0.111464	0.056528	0.150473													0.065717	0.210065	0.116301	0.355682									0.053398	0.142576	0.09673	0.21972
							0.085539	0.088242	0.043681	0.08502													0.102227	0.11347	0.089082	0.266479									0.132223	0.613076	0.110817	0.663044
							0.360195	0.049761	0.079653	0.082321													0.038943	0.619139	0.235077	0.095978									0.113788	0.117813	0.166695	0.299063
							0.329936	0.031299	0.114341	0.039136													0.166321	0.130345	0.200434	0.057587									0.095353	0.105806	0.078417	0.043833
							0.22694	0.222422	0.043681	0.047908													0.189849	0.194936	0.155893	0.088074									0.038777	0.059282	0.686502	0.067137
							0.144893	0.188459	0.114341	0.089069													0.719642	0.08903	0.136097	0.394073									0.09726	0.208611	0.049774	0.205294
							0.123944	0.056604	0.093785	0.147774													0.100604	0.145474	0.12125	0.047424									0.153836	0.174843	0.053061	0.262998
							0.67442	0.09656	0.030834	0.109987													0.079509	1.6974	0.071403	0.142273									0.044498	0.05553	0.128661	0.095434
							0.080302	0.102554	0.21198	0.035088													0.137925	0.053535	0.06569	0.330841									0.087725	0.177845	0.630155	0.451092
							0.059354	0.177139	0.075799	0.341431													0.346434	0.068664	0.039985	0.250671									0.176721	0.294907	0.151669	0.354548
							0.259527	0.240402	0.09507	0.039136													0.253944	0.168169	0.139949	0.086945									0.043862	0.194353	0.124904	0.058259
							0.10416	0.183132	0.050104	0.192308													0.141981	0.037823	0.10282	0.09259									0.058483	0.03677	0.209425	0.03773
							0.054698	0.189125	0.228682	0.077598													0.064094	0.056444	0.159942	0.299225									0.040048	0.09305	0.041791	0.118738
							0.049461	0.16715	0.088646	0.048583													0.198774	0.089612	0.568364	0.048553									0.040684	0.078042	0.051652	0.066027
							0.082048	0.043286	0.136181	0.055331													0.141981	0.313061	0.10282	0.50473									0.093446	0.20711	0.045548	0.245243
							0.063427	0.26371	0.050104	0.219973													0.148472	0.326445	0.05141	0.075653									0.048948	0.046525	0.055409	0.038839
							0.058772	0.16049	0.209411	0.113361													0.076264	0.192608	0.191359	0.293579									0.157015	0.05628	0.536242	0.141486
							0.218794	0.179136	0.35844	0.077598													0.210944	0.051789	0.125668	0.050812									0.03687	0.062283	0.123026	0.054375
							0.097177	0.123198	0.053959	0.037787													0.066528	0.141401	0.085683	0.064362									0.063569	0.161336	0.155426	0.07324
							0.32179	0.262378	0.35587	0.085695													0.040566	0.07041	0.174222	0.19873									0.099167	0.330176	0.077948	0.155912
							0.281639	0.299671	0.159307	0.157895													0.533849	0.064591	0.348444	0.365845									0.144937	0.077291	0.068556	0.081563
							0.140819	0.265708	0.30705	0.235493													0.113585	0.047716	0.202783	0.05307									0.151294	0.03752	0.67805	0.086556
							0.153621	0.082576	0.101494	0.106613													0.041377	0.145474	0.165654	0.136627									0.058483	0.065312	0.248869	0.051046
							0.370669	0.127859	0.055243	0.072875													0.047868	0.185044	0.074259	0.076782									0.057848	0.050383	0.820328	0.102092
							0.038405	0.073919	0.032118	0.05668													0.333616	1.13237	0.094251	0.229217									0.055305	0.068422	0.100956	0.450537
							0.765196	0.055273	0.030834	0.070176													0.38272	0.484139	0.265617	0.25293									0.167186	0.100145	0.263425	0.406704
							0.267673	1.94186	0.134897	0.047234													0.09243	0.076811	0.074259	0.089203									0.049584	0.044163	0.703876	0.083782
							0.201919	0.032631	0.052674	0.068151													0.206524	0.247889	0.128525	0.169373									0.047677	0.059714	0.042261	0.193642
							0.096595	0.564047	0.101494	0.068826													0.199303	0.064591	0.094251	0.173889									0.191978	0.090193	0.464868	0.03773
							0.088448	0.191123	0.16573	0.080297													0.080877	0.048298	0.148517	0.175018									0.102981	0.045407	0.037096	0.624759
							0.743084	0.141178	0.050104	0.126856													0.108317	0.259526	0.105676	0.044037									0.408747	0.179763	0.122556	0.084892
							0.274074	0.408884	0.053959	0.030364													0.287401	0.075647	0.145661	0.090332									0.086454	0.062824	0.065269	0.521002
							0.094267	0.46682	0.088646	0.035088													0.262849	0.192026	0.122812	0.05307									0.197699	0.07091	0.056348	0.345116
							0.247889	0.715214	0.034688	0.064103													0.288845	0.061681	0.254193	0.055328									0.132223	0.174787	0.644241	0.414472
							0.053535	0.102554	0.074514	0.046559													0.179084	0.037823	0.237056	0.037262									0.129045	0.082106	0.062452	0.05382
							0.068082	0.394899	0.050104	0.105263													0.119871	0.155949	0.06569	0.155823									0.039413	0.094547	0.1728	0.149254
							0.058772	0.57004	0.041111	0.091093													0.11265	0.044806	0.134237	0.042908									0.146208	0.053493	0.091545	0.12817
							0.043642	1.46905	0.086077	0.088394													0.157421	0.225776	0.151373	0.055328									0.050219	0.05847	0.084337	0.048827
							0.066336	0.34229	0.050104	0.049933													0.086654	0.047134	0.057122	0.074524									0.109338	0.2034	0.218411	0.170893
							0.128018	0.04262	0.068091	0.11471													0.257072	0.047134	0.202783	0.124207									0.046405	0.060336	0.046133	0.131499
							0.237996	0.071921	0.052674	0.132254													0.160309	0.04306	0.105676	0.03952									0.080097	0.043541	0.202553	0.103757
							0.037823	0.225752	0.196564	0.048583													0.127092	0.452135	0.045698	0.08017									0.095989	0.08957	0.367623	0.132609
							0.050625	0.226418	0.226112	0.04386													0.216634	0.065754	0.139949	0.068878									0.04577	0.039187	0.137679	0.037175
							0.274656	0.253055	0.078369	0.051957													0.23252	0.937438	0.079971	0.103882									0.052762	0.047273	0.555039	0.066582
							0.180388	0.659941	0.062952	0.266532													0.103984	1.07011	0.06569	0.045166									0.140487	0.043541	0.791471	0.080453
							0.280475	0.642627	0.079653	0.033063													0.090986	0.047134	0.377005	0.127594									0.044498	0.227658	1.00051	0.164344
							0.185044	0.109213	0.093785	0.033063													0.969076	0.12278	0.191359	0.229217									0.146844	0.069044	0.170837	0.068956
							0.075065	1.02954	0.074514	0.194332													0.203636	0.335755	0.071403	0.064362									0.130952	0.175409	0.113891	0.052866
							0.165259	1.29324	0.041111	0.087719													0.147311	0.038987	0.114244	0.089203									0.100439	0.194691	0.0692	0.054015
							0.20832	0.033963	0.035972	0.047908													0.277292	0.364268	0.088539	0.047424									0.09726	0.111963	0.103079	0.091941
							0.095431	0.073253	0.071945	0.109312													0.053436	0.139074	0.231344	0.038391									0.474223	0.077752	0.205437	0.044821
							0.03375	0.164486	0.066806	0.039811													0.050548	0.059999	0.131381	0.057587									0.057212	0.059092	0.073525	0.036776
							0.227522	0.223754	0.080938	0.04251													0.207969	0.04909	0.085683	0.08017									0.057212	0.240721	0.094429	0.075851
							0.412566	0.058602	0.074514	0.136977													0.041883	0.062337	0.162798	0.062103									0.090268	0.051627	0.049737	0.068956
							0.101832	0.047947	0.305766	0.162618													0.501147	0.234543	0.045698	0.074524									0.040048	0.057848	0.116054	0.057463
							1.24701	0.459763	0.088646	0.090418													1.56121	0.258699	0.074259	0.05307									0.126502	0.107609	0.046854	0.04712
							0.10125	0.078667	0.097639	0.109987													0.395718	0.042857	0.311315	0.060974									0.074375	0.056604	0.118937	0.044821
							0.070992	0.419992	0.146459	0.097841													0.135757	0.52519	0.128525	0.135498									0.046405	0.07091	0.180208	0.036776
							0.030841	0.101393	0.101494	0.087045													0.059213	0.189349	0.228488	0.094849									0.095353	0.911255	0.707134	0.448212
							0.071573	0.249985	0.053959	0.177463													0.119871	0.175323	0.128525	0.044037									0.216134	0.051627	0.191741	0.04712
							0.230432	0.034963	0.057813	0.104589													0.248407	0.364672	0.162798	0.04705									0.121416	0.190959	0.508185	0.399943
							0.171078	0.279704	0.086077	0.095142													0.049104	0.12857	0.191359	0.057278									0.292416	0.05847	0.271032	0.225255
							0.073319	0.174378	0.54601	0.05803													0.046215	0.063116	0.21992	0.045004									0.046405	0.23139	0.412315	0.255136
							0.046552	0.506526	0.349447	0.045884													0.099652	0.057662	0.16851	0.049096									0.047677	0.062824	0.575222	0.037926
							0.13791	0.479866	0.295488	0.10189													0.11265	0.214284	0.1171	0.040913									0.585468	0.246319	0.646584	0.098836
							0.125108	0.079541	0.172154	0.336211													0.046215	0.043636	0.185647	0.040913									0.093446	0.052871	0.397177	0.073553
							0.043642	0.360992	0.044966	0.126541													0.122759	0.092726	0.037129	0.059324									0.107431	0.075264	0.436823	0.097687
							0.122781	0.093526	0.060382	0.118228													0.090986	0.038961	0.162798	0.045004									0.065476	0.139954	1.85253	0.597615
							0.126854	0.114504	0.150313	0.206899													0.063546	0.046753	0.091395	0.061369									0.55432	0.090193	0.050458	0.036776
							0.044806	0.032341	0.301912	0.04803													0.1502	0.071688	0.119956	0.038867									0.068654	0.319095	1.53537	0.080448
							0.443406	0.041081	0.265939	0.084053													0.826098	0.070129	0.048554	0.040913									0.066747	0.062202	0.041808	0.173538
							0.093686	0.439222	0.136181	0.169953													0.041883	0.041298	0.077115	0.065461									0.112517	0.116317	0.046133	0.036776
							0.069828	0.2596	0.060382	0.11361													0.576246	0.179219	0.045698	0.071598									0.095989	0.044163	0.063433	0.050567
							0.10125	0.035837	0.087362	0.124694													0.118427	1.46103	0.119956	0.081826									0.075647	0.103877	0.731642	0.581526
							0.361359	0.067741	0.055243	0.206899													0.134313	0.052987	0.251337	0.036822									0.051491	0.550485	0.535577	0.620601
							0.072737	0.040207	0.131042	0.116381													0.1502	1.04493	0.039985	0.042959									0.044498	0.074642	0.0865	0.043672
							0.054698	0.091778	0.047535	0.078511													0.046215	0.151167	0.134237	0.045004									0.085818	0.099523	0.120379	0.258584
							0.265927	0.162578	0.127188	0.108068													0.210857	0.48545	0.054266	0.081826									0.04577	0.722784	0.061271	0.06206
							0.167005	0.037148	0.268509	0.074816													0.229632	0.214284	0.059978	0.053187									0.172907	0.355172	0.707134	0.157449
							0.077392	0.838673	0.11691	0.043412													0.051992	0.176102	0.108532	0.063415									0.082004	0.056604	0.093708	0.464301
							0.156531	1.96579	0.086077	0.067427													0.135757	0.053766	0.18279	0.049096									0.053398	0.044163	0.578106	2.18015
							0.317716	0.101393	0.044966	0.036023													0.105429	0.751162	0.114244	0.075689									0.06929	0.078374	0.119658	1.10214
							0.120453	0.040207	0.077084	0.051725													0.043327	0.048311	0.151373	0.053187									0.465959	0.049761	0.343115	0.079299
							0.036078	0.052444	0.050104	0.102526													0.122759	0.042857	0.114244	0.04705									0.283517	0.047895	0.360415	0.057463
							0.070992	0.12543	0.097639	0.048954													1.42545	0.042078	0.059978	0.049096									0.062933	0.06469	0.136958	0.122971
							0.069828	0.263533	0.335315	0.172724													0.441933	0.081817	0.10282	0.038867									0.181171	0.082728	1.12233	0.114926
							0.062845	1.02485	0.089931	0.183807													0.079432	0.750382	0.16851	0.049096									0.048948	0.222682	0.059829	0.077
							0.05819	0.166074	0.201703	0.076663													0.671565	0.080259	0.068546	0.102282									0.906491	0.093925	0.113891	0.484988
							0.049461	0.223326	0.042396	0.150556													0.077988	0.053766	0.1171	0.102282									0.10171	0.100767	0.238595	0.542451
							0.123944	0.557659	0.052674	0.159792													0.076544	1.90907	0.088539	0.405039									0.046405	0.053493	0.313561	0.943543
							0.03375	0.255229	0.061667	0.292799													0.219522	0.856355	0.062834	0.660745									0.312758	0.271822	0.259499	0.722885
							0.032586	0.306363	0.053959	0.077587													0.340837	0.096622	0.042842	0.198428									0.043227	0.046029	0.154978	0.197673
							0.031422	0.030156	0.068091	0.060961													0.044771	0.114544	0.137093	0.083872									0.109338	0.118183	0.09515	1.97558
							0.037241	0.206718	0.061667	0.233685													0.111205	0.056883	0.10282	0.114556									0.132223	0.062824	0.097312	0.039075
							0.122199	0.059437	0.177293	0.093289													0.06499	0.060779	0.048554	0.433678									0.165279	0.080862	0.134795	0.449361
							0.215302	0.4248	0.105348	0.139472													0.41016	0.075584	0.142805	0.337532									0.204056	0.400579	0.060739	0.474645
							0.059354	0.150778	0.366148	0.04803													0.056325	0.166752	0.068546	0.184108									0.251732	0.088948	0.223181	0.042523
							0.061099	0.107074	0.289064	0.235532													0.281624	0.249348	0.077115	0.2823									0.06484	0.79556	0.13066	0.180434
							0.032586	0.252607	0.098924	0.114533													0.086654	0.094285	0.05141	0.116602									0.09726	0.046029	0.143372	0.050567
							0.030259	0.399452	0.160591	0.18196													0.108317	0.551683	0.142805	0.192291									0.10171	0.156748	0.125716	2.36863
							0.061681	0.031904	0.066806	0.092366													0.127092	0.054545	0.162798	0.04705									0.200242	0.046651	0.13066	0.619451
							0.068664	0.104889	0.113056	0.084053													0.164642	0.413762	0.128525	0.112511									0.126502	0.075264	0.117947	0.57463
							0.439915	0.052444	0.061667	0.044335													1.32147	0.115324	0.134237	0.190245									0.043227	0.046029	0.177273	0.584973
							0.077974	0.045452	0.123334	0.045259													0.040438	0.112207	0.10282	0.229113									0.20342	0.041675	0.354547	0.058612
							0.135	0.059874	0.250522	0.049877													0.041883	0.367789	0.128525	0.212748									0.064204	0.039187	0.055795	0.055164
							0.059354	0.074216	0.318613	0.160716													0.17764	0.043636	0.545515	0.040913									0.048948	0.042297	0.065683	0.229852
							0.050625	0.213955	0.056528	0.326974													0.059213	0.402074	0.382718	0.038867									0.068654	0.054738	0.218237	0.116075
							0.121035	0.032093	0.065521	0.035099													0.583467	0.046753	0.074259	0.049096									0.091539	0.05536	0.485912	0.057463
							0.05528	0.195903	0.193994	0.157021													0.085209	1.74154	0.251337	0.051141									0.049584	0.038565	0.10029	0.075851
							0.07041	0.335642	0.030834	0.054496													0.0751	0.086493	0.171366	0.04705									0.130316	0.1356	0.04732	1.05962
							0.086703	0.042791	0.04882	0.120075													0.147311	0.046753	0.171366	0.04705									0.104253	0.048517	0.068508	0.102284
							0.118707	0.055495	0.066806	0.035099													0.428935	0.175323	0.048554	0.517549									0.538427	0.0678	0.057208	0.071254
							0.169914	0.044797	0.093785	0.070198													0.099652	0.07948	0.057122	0.04705									0.139851	0.045407	0.04732	0.052866
							0.105905	0.175176	0.196564	0.218906													0.03755	0.097402	0.134237	0.042959									0.171636	0.043541	0.108765	0.420629
							0.087867	0.038111	0.107917	0.338982													0.085209	0.066233	0.119956	0.071598									0.117602	0.113207	0.065683	0.224106
							0.238578	0.038779	0.325037	0.111762													0.096763	0.042078	0.042842	0.182063									0.328015	0.093925	0.060033	0.04597
							0.030259	0.230671	0.056528	0.053572													0.050548	0.070129	0.134237	0.460271									0.129045	0.100262	0.040964	1.96179
							0.041315	0.127036	0.071945	0.466446													0.053436	0.320257	0.222776	0.192291									0.160193	0.221213	0.16456	0.194225
							0.03375	0.079565	0.061667	0.403637													0.53292	0.607786	0.268474	0.042959									0.14748	0.164451	1.54461	0.222957
							0.203082	0.12503	0.086077	0.362073													0.316286	0.341295	0.202783	0.036822									0.062933	0.093365	0.108765	0.245942
							0.071573	0.062181	0.096355	0.045259													0.417381	0.155843	0.125668	0.247524									0.150022	0.102384	0.05862	0.102284
							0.081466	0.176513	0.069375	0.067427													0.836207	0.421554	0.074259	0.196382									0.061026	0.129969	1.73883	0.882632
							0.056444	0.104303	0.11691	0.060961													0.228188	0.09896	0.037129	0.118648									0.070561	0.305029	0.20058	1.09295
							0.087867	0.502126	0.156737	0.197662													0.090986	1.64804	0.071403	0.231158									0.04132	0.063658	0.05862	0.565436
							0.040151	0.382445	0.083507	0.081282													0.047659	0.03974	0.057122	0.206611									0.038777	0.07639	0.042376	0.865393
							0.404419	0.374422	0.111772	0.040641													0.089542	0.04987	0.151373	0.059324									0.06039	0.093365	0.609509	0.265479
							0.278729	0.552941	0.075799	0.22999													0.038994	0.041298	0.037129	0.114556									0.044498	0.203707	0.360197	0.924005
							0.03375	0.228665	0.074514	0.122846													0.674454	0.127012	0.045698	0.090009									0.06929	0.180896	0.097465	0.058612
							0.044224	1.12193	0.055243	0.06558													0.158865	0.040519	0.082827	0.175926									0.059119	0.383011	3.30816	0.052866
							0.0675	0.032762	0.071945	0.041565													1.78795	0.117661	0.094251	0.067506									0.127773	0.053579	0.125009	0.04712
							0.044039	0.100292	0.060382	0.104373													0.23252	0.044415	0.048554	0.411175									0.065476	0.122542	0.9916	0.072403
							0.07201	0.138402	0.087362	0.145938													0.077988	0.12857	0.062834	0.302756									0.137944	0.041378	0.09464	0.048269
							0.116644	0.342329	0.061667	0.251234													0.088098	0.046753	0.068546	0.114556									0.387134	0.169755	0.226006	0.044821
							0.069629	0.054826	0.030834	0.109915													0.530031	0.204933	0.111388	0.118648									0.13413	0.464175	1.23103	0.04597
							0.036302	0.653901	0.436808	0.041565													0.101096	0.15818	0.231344	0.051141									0.190071	0.420145	0.122891	0.071254
							0.068439	0.080233	0.131042	0.092366													0.778438	0.070129	0.097107	0.038867									0.250461	0.111933	0.045907	0.049418
							0.039278	0.038779	0.123334	0.11361													0.138646	0.041106	0.268474	0.648471									0.038141	0.046152	0.418817	0.063209
							0.050585	0.819716	0.035972	0.079434													0.678786	0.340751	0.137093	0.071598									0.109974	0.089652	0.737344	0.058612
							0.076771	0.203258	0.11948	0.316814													0.313397	0.040025	0.125668	0.190245									0.145573	0.198402	0.049439	0.052866
							0.164849	0.565644	0.137466	0.150556													0.0751	0.165508	0.151373	0.167743									0.1799	0.09867	0.060739	0.111478
							0.111288	0.12971	0.033403	0.187502													0.28018	0.036779	0.194215	0.405039									0.086454	0.144823	0.064977	0.123944
							0.131522	0.391806	0.066806	0.112686													0.062102	0.305053	0.165654	0.0941									0.144937	0.050927	0.074864	0.044806
							0.157708	0.290846	0.034688	0.118228													0.25274	1.31865	0.1171	0.276163									0.223126	0.420145	0.529701	0.062845
							0.030351	0.500121	0.04882	0.125617													0.200748	0.04976	0.091395	0.120693									0.385862	0.874771	0.137722	0.107651
							0.119025	0.086251	0.247953	0.047106													0.076544	0.044352	0.111388	0.317076									0.184349	0.097609	0.189986	0.128599
							0.104742	0.17317	0.079653	0.087747													0.582023	0.062741	0.21992	0.617786									0.091539	0.077981	0.038845	0.068664
							0.045824	0.131048	0.187571	0.212441													0.122759	0.713954	0.06569	0.049096									0.239654	0.122012	0.984538	0.038405
							0.198176	0.161804	0.097639	0.155174													0.098207	0.24123	0.037129	0.040913									0.105524	0.311395	0.598209	0.099505
							0.16961	0.345003	0.034688	0.384241													0.046215	0.056251	0.074259	0.357989									0.06039	0.046152	0.393391	0.155367
							0.099385	0.08157	0.113056	0.169953													0.255628	0.054087	0.159942	0.646425									0.127138	0.187792	0.057208	0.052953
							0.032732	0.161804	0.056528	0.139472													0.096982	0.056251	0.039985	0.073643									0.041955	0.062067	0.134191	0.07041
							0.048205	0.522853	0.034688	0.05819													0.063362	0.22284	0.091395	0.63006									0.042591	0.979277	0.235894	0.123944
							0.076771	0.167821	0.035972	0.111762													0.084051	0.137382	0.077115	0.204565									0.04577	0.063128	0.039551	0.190281
							0.090459	0.060844	0.051389	0.234609													0.07112	0.403492	0.085683	0.077735									0.068654	0.094426	0.175155	0.10416
							0.204127	0.034768	0.034688	0.060961													0.064655	3.05486	0.037129	0.059324									0.06039	0.227578	0.55442	0.037823
							0.061298	0.123024	0.152883	0.084053													0.046551	0.060578	0.057122	0.192291									0.059755	0.272139	1.3525	0.222285
							0.089863	0.382445	0.059098	0.070198													0.050431	0.040025	0.134237	0.063415									0.251732	0.291767	0.050145	0.060517
							0.062488	0.126367	0.077084	0.138548													0.106034	0.054087	0.199927	0.290482									0.246011	0.038195	0.383504	0.152457
							0.052371	0.070873	0.154168	0.124694													0.089224	0.089785	0.279898	0.149332									0.254911	0.061536	0.062858	0.04306
							0.186273	0.102297	0.030834	0.034175													0.227585	0.297481	0.131381	0.171835									0.125866	0.063658	0.074864	0.059935
							0.039873	0.061512	0.084792	0.210594													0.085344	0.255293	0.068546	0.278208									0.037506	0.235005	0.209762	0.040151
							0.080342	0.0916	0.100209	0.482148													0.09181	0.206614	0.045698	0.139104									0.055305	0.040317	0.057914	0.466682
							0.081532	0.104424	0.111772	0.119152													0.134482	0.168753	0.099964	0.061369									0.271439	0.223335	0.097465	0.081466
							0.1464	0.095674	0.059098	0.045259													0.051724	0.135219	0.114244	0.613695									0.044498	0.336328	0.056501	0.039569
							0.041659	0.056004	0.039827	0.375928													0.075	0.459743	0.062834	0.208656									0.109338	0.559662	0.264351	0.213557
							0.089268	0.286437	0.043681	0.163487													0.056896	0.450007	0.3513	0.036822									0.043862	0.084347	0.065708	0.3311
							0.204127	0.053671	0.061667	0.05819													0.076293	0.071395	0.048554	0.051141									0.051491	0.278505	0.064189	0.090776
							0.205317	0.039086	0.060382	0.18196													0.126723	0.112502	0.062834	0.063415									0.120781	0.045091	0.049376	0.083793
							0.188654	0.104424	0.044966	0.135777													0.23793	0.614433	0.1171	0.538006									0.188164	0.403169	0.216115	0.093686
							0.0488	0.033252	0.159307	0.139472													0.122844	0.385102	0.037129	0.376399									0.092175	0.084347	0.256375	0.084957
							0.032732	0.034419	0.156737	0.143167													0.063362	0.206614	0.045698	0.378445									0.330558	0.067902	0.331579	0.076811
							0.367786	0.224016	0.174723	0.051725													0.148706	0.557101	0.294178	0.059324									0.139851	0.06525	0.056972	0.058772
							0.080342	0.063588	0.043681	0.056343													0.337498	0.147118	0.099964	0.038867									0.081368	0.041908	0.178893	0.558622
							0.057727	0.035586	0.030834	0.061885													0.051724	0.04976	0.177078	0.56869									0.03687	0.038725	0.063809	0.116962
							0.041659	0.471367	0.074514	0.169029													0.098275	0.143873	0.074259	0.04705									0.11506	0.051457	0.413999	0.313061
							0.110693	0.037336	0.051389	0.109915													0.192671	0.684747	0.468401	0.122739									0.06039	0.037134	0.445903	0.363686
							0.035707	0.761305	0.038542	0.093289													0.042672	1.21048	0.048554	0.081826									0.109974	0.05411	0.095334	0.07041
							0.163659	0.296355	0.07066	0.094213													0.064655	0.301808	0.282754	0.231158									0.070561	0.106628	0.089257	0.070992
							0.12081	0.13826	0.158022	0.060961													0.134482	0.114665	0.039985	0.143195									0.112517	0.037134	0.067607	0.066336
							0.058917	0.092173	0.07066	0.178266													0.069827	0.623087	0.148517	0.053187									0.047677	0.085939	0.150407	0.234505
							0.177942	0.155761	0.133612	0.045259													0.165516	0.04976	0.279898	0.04705									0.082424	0.079573	0.108247	0.050043
							0.0488	0.195431	0.319898	0.049877													0.07112	0.282336	0.114244	0.376399									0.083436	0.133029	0.044818	0.146638
							0.063083	0.103257	0.208126	0.067427													0.100861	0.429454	0.099964	0.869401									0.063209	0.133029	0.046337	0.054698
							0.316605	0.212349	0.092501	0.115457													0.041379	0.038943	0.119956	0.042959									0.06422	0.079976	0.57504	0.107651
							0.089863	0.397862	0.050104	0.073892													0.058189	0.037861	0.057122	0.112511									0.038431	0.062555	0.116224	0.058772
							0.75521	0.04492	0.042396	0.22999													0.060775	0.131973	0.085683	0.122739									0.052084	0.209045	0.342593	0.048298
							0.339815	0.438698	1.19094	0.0859													0.077586	0.073559	0.088539	0.036822									0.466735	0.05622	0.166739	0.552803
							0.092839	0.069422	0.04625	0.141319													0.042672	0.180652	0.048554	0.081826									0.096583	0.053053	0.043299	0.824549
							0.236859	0.058921	0.249238	0.120075													0.064655	0.269355	0.068546	0.14115									0.792387	0.043551	0.078242	0.148384
							0.064868	0.094507	0.041111	0.036946													0.059482	0.038943	0.057122	0.04705									0.128441	0.037216	0.039501	0.141983
							0.183298	0.05017	0.039827	0.098831													0.098275	0.058414	0.037129	0.038867									0.049556	0.108482	0.403744	0.252544
							0.065463	0.067088	0.04882	0.152403													0.058189	0.057333	0.185647	0.124785									0.704906	0.104523	0.042159	0.044806
							0.089268	0.032086	0.047535	0.061885													0.068534	0.355895	0.037129	0.490956									0.150184	0.178163	0.075963	0.096013
							0.071415	0.101507	0.107917	0.045259													0.385342	0.053006	0.042842	0.713931									0.040959	0.096604	1.04525	0.11347
							0.305298	0.249685	0.041111	0.090518													0.186206	0.186061	0.319883	0.071598									0.411616	0.593878	0.467553	0.192608
							0.251737	0.65338	0.04882	0.094213													0.5431	0.060578	0.048554	0.073643									0.037925	0.058596	1.00309	0.718644
							0.061298	0.120759	0.068091	0.125617													0.107327	0.834028	0.094251	0.108419									0.137543	0.093437	0.04064	0.101832
							0.112478	0.175013	0.033403	0.227219													0.592238	0.159017	0.045698	0.122739									0.070288	0.04751	0.107868	0.05819
							0.094624	0.13651	0.053959	0.053572													0.17974	0.263947	0.06569	0.067506									0.036914	0.134612	0.064569	0.10125
							0.094029	0.135927	0.053959	0.118228													0.07112	0.060578	0.119956	0.308893									0.180525	0.092645	0.055073	0.11638
							0.061298	0.180263	0.052674	0.108068													0.244395	0.072477	0.114244	0.163652									0.242217	0.099772	0.039881	0.068664
							0.040468	0.756054	0.051389	0.302959													0.131896	0.219595	0.045698	0.294573									0.036914	0.196376	0.099512	0.496359
							0.268995	0.194264	0.09507	0.132083													0.223706	0.073559	0.151373	0.229113									0.101134	0.216172	0.179273	0.052371
							0.104146	0.257269	0.136181	0.054496													0.053017	0.139546	0.18279	0.468454									0.039948	0.232008	0.063809	0.169914
							0.033922	0.242684	0.213265	0.117304													0.093103	0.193633	0.05141	0.0941									0.735246	0.188457	0.080141	0.146056
							0.088078	0.78114	0.032118	0.050801													0.067241	0.046515	0.085683	0.36208									0.04905	0.037216	0.080901	0.073901
							0.105932	0.454449	0.035972	0.031404													0.226292	0.097357	0.099964	0.124785									0.129452	0.072057	0.137113	0.376488
							0.07201	0.039086	0.034688	0.235532													0.086637	0.314789	0.074259	0.049096									0.157264	0.212212	2.6325	0.073319
							0.124976	0.168012	0.037257	0.118228													0.095689	0.085458	0.077115	0.106374									0.045005	0.045927	0.278025	0.07041
							0.077366	0.13476	0.109202	0.261395													0.068534	0.134137	0.114244	0.090009									0.081413	0.134612	0.137493	0.363686
							0.327317	0.035003	0.047535	0.1718													0.065948	0.040025	0.099964	0.110465									0.060175	0.110065	0.237764	0.118707
							0.449318	0.075839	0.039827	0.137625													0.10862	0.130892	0.319883	0.231158									0.054612	0.177372	0.295876	0.125108
							0.608215	0.296355	0.133612	0.14409													0.165516	0.082213	0.054266	0.053187									0.145633	0.283478	1.04373	0.293859
							0.264234	0.054254	0.052674	0.165334													1.02025	0.038943	0.085683	0.0941									0.210359	0.044343	0.080521	0.064009
							0.216625	0.565291	0.140036	0.035099													0.157758	0.234739	0.054266	0.067506									0.03742	0.376915	0.085838	0.050043
							0.035707	0.057171	0.136181	0.088671													0.166809	0.133055	0.042842	0.165698									0.08647	0.092645	0.137113	0.04306
							0.051181	0.376861	0.222258	0.035099													0.131896	0.041106	0.079971	0.108419									0.140577	0.06018	1.88616	0.622631
							0.219005	0.152844	0.030834	0.296493													0.149999	0.287745	0.148517	0.040913									0.542585	0.066514	0.051275	1.19696
							0.036302	0.055421	0.051389	0.154251													0.164223	0.125483	0.057122	0.07978									0.273568	0.051469	0.43109	0.071573
							0.057727	0.533788	0.037257	0.041565													0.075	0.122238	0.068546	0.040913									0.061186	0.052261	0.054693	0.045388
							0.110693	0.215849	0.100209	0.056343													0.140947	0.139546	0.042842	0.038867									0.088492	0.130653	0.140532	0.103578
							0.56001	0.040836	0.133612	0.198586													0.112499	0.047597	0.05141	0.053187									0.039948	0.348408	0.042919	0.087867
							0.19282	0.22635	0.185001	0.098831													0.250861	0.120074	0.308459	0.049096									0.986059	0.084727	0.126313	0.093104
							0.043444	0.092173	0.07323	0.182884													0.07112	0.153608	0.048554	0.382536									0.152713	0.06018	0.15073	0.119871
							0.034517	0.057754	0.062055	0.110839													0.077586	0.038943	0.111388	0.042959									0.124901	0.040384	0.053061	0.372415
							0.032732	0.094507	0.068021	0.033252													1.05387	0.249884	0.088539	0.12683									0.179513	0.081559	0.079826	0.104742
							0.251737	0.243851	0.094275	0.064656													1.73016	0.166589	0.071403	0.069552									0.087481	0.155992	0.637668	0.088448
							0.039278	0.163345	0.047734	0.160716													0.078879	0.04976	0.091395	0.040913									0.264466	0.227257	1.23448	0.21472
							0.036302	0.04317	0.072795	0.376851													0.347843	0.078968	0.05141	0.286391									0.111753	0.204294	1.20208	0.039569
							0.515971	0.073505	0.045348	0.202281													0.228878	0.045433	0.202783	0.116602									0.104674	0.640596	0.072313	0.102414
							0.067844	0.050754	0.057281	0.13393													0.457756	0.125483	0.245625	0.065461									0.037925	0.073641	0.203791	0.144311
							0.061893	0.229267	0.081148	0.036023													0.107327	0.044352	0.082827	0.067506									0.078379	0.041176	0.089687	0.091358
							0.072605	0.129509	0.089502	0.038794													0.047845	0.193633	0.048554	0.513458									0.411616	0.049094	0.189234	0.572588
							0.313034	0.09159	0.077568	0.039717													0.694392	0.058414	0.111388	0.169789									0.79896	0.057012	0.920345	0.069246
							0.173776	0.065338	0.134849	0.042488													0.263792	0.057333	0.1171	0.067506									0.044499	0.065567	0.200504	0.118125
							0.221981	0.112008	0.052508	0.098831													0.059482	0.220677	0.21992	0.069552									0.087987	0.135818	0.082174	0.250216
							0.186869	0.056004	0.039381	0.064656													0.166809	0.114665	0.085683	0.157515									0.13552	0.247439	0.059165	0.231014
							0.038088	0.067672	0.078762	0.032328													0.204309	0.106011	0.171366	0.225021									0.069783	0.073373	0.040382	0.116962
							0.104742	0.054837	0.053701	0.059114													0.042672	0.065987	0.062834	0.051141									0.048544	0.155332	0.351234	0.08263
							0.054751	0.109091	0.068021	0.047106													0.153878	0.212023	0.085683	0.053187									0.03742	0.042931	0.077478	0.123944
							0.040468	0.043753	0.058474	0.146861													0.664651	0.055169	0.197071	0.051141									0.111248	0.098351	0.061982	0.049847
							0.043444	0.042586	0.100242	0.245692													0.479738	0.285582	0.122812	0.057278									0.05259	0.183432	0.082174	0.038857
							0.071415	0.131843	0.057281	0.121923													0.475859	0.126565	0.088539	0.040913									0.043488	0.094448	0.078887	0.155427
							0.099385	0.113758	0.077568	0.193968													0.223706	0.114665	0.119956	0.370262									0.05259	0.039028	0.102565	0.042389
							0.075581	0.132426	0.120529	0.185655													0.218533	0.058414	0.094251	0.069552									0.149679	0.40199	0.258708	0.14326
							0.039873	0.05017	0.048928	0.07574													0.174568	0.046515	0.154229	0.075689									0.229069	0.044492	0.404135	0.097338
							0.04999	0.084589	0.046541	0.178266													0.270257	0.191469	0.099964	0.17388									0.040959	0.272417	0.391123	0.038857
							0.0732	0.065921	0.042961	0.193044													0.228878	0.208777	0.137093	0.038867									0.114282	0.060884	0.059702	0.083208
							0.071415	0.140594	0.046541	0.119152													0.466807	0.070314	0.137093	0.036822									0.05613	0.090545	0.24493	0.041212
							0.058917	0.09859	0.045348	0.091442													0.157758	0.120074	0.045698	0.040913									0.118327	0.118646	0.444701	0.044744
							0.038683	0.159262	0.053701	0.165334													0.266378	0.141709	0.068546	0.061369									0.052371	0.445702	0.070417	0.098123
							0.151161	0.128343	0.036994	0.036023													0.113792	0.110338	0.039985	0.167743									0.43526	0.102254	0.655188	0.068294
							0.088078	0.106174	0.118142	0.039717													0.329739	0.10493	0.042842	0.2823									0.094849	0.209972	1.92806	0.038072
							0.115454	0.055421	0.054894	0.097907													0.041379	0.120074	0.071403	0.059324									0.063427	0.078837	0.076541	0.074966
							0.112478	0.04842	0.106209	0.202281													0.094396	0.059496	0.1171	0.071598									0.347393	0.078056	0.042097	0.070256
							0.05692	0.140594	0.031027	0.061885													0.067241	0.06166	0.057122	0.04705									0.04306	0.142843	0.067356	0.160137
							0.060204	0.053671	0.059668	0.034607													0.069827	0.053006	0.16851	0.147287									0.153039	0.191238	0.276312	0.062799
							0.032838	0.066791	0.042961	0.034607													0.140947	0.063823	0.039985	0.038867									0.050625	0.102254	0.430924	0.083993
							0.084285	0.074598	0.058474	0.076134													0.085344	0.044664	0.10282	0.040913									0.345647	0.04137	0.048986	0.082423
							0.11384	0.05725	0.040574	0.102666													0.139654	0.06112	0.142805	0.07978									0.052371	0.130354	0.435517	0.080853
							0.058014	0.169581	0.081148	0.099205													0.08793	0.04584	0.099964	0.143195									0.102996	0.555761	0.133181	0.264147
							0.059109	0.172183	0.072795	0.130351													0.221119	0.037612	0.068546	0.049096									0.073901	0.044492	1.87831	0.186434
							0.230963	0.045973	0.097855	0.053063													0.124137	0.044664	0.06569	0.081826									0.455626	0.071031	0.59166	0.099301
							0.077717	0.072863	0.17781	0.086516													0.151292	0.146923	0.245625	0.130922									0.151875	0.045273	0.644473	0.041212
							0.461926	0.109295	0.070408	0.064599													0.055603	0.054067	0.10282	0.055233									0.131509	0.135818	0.509761	0.038072
							0.129164	0.059418	0.088308	0.077288													0.047845	0.467801	0.082827	0.053187									0.297932	0.206069	0.041332	0.277492
							0.213449	0.143992	0.15991	0.095745													0.131896	0.072874	0.125668	0.04705									0.059935	0.168602	0.081133	0.073396
							0.051447	0.09238	0.047734	0.033453													0.109913	0.068172	0.2342	0.036822									0.349721	0.533125	0.56334	0.095376
							0.049257	0.101922	0.113369	0.148808													0.115086	0.056418	0.145661	0.071598									0.062845	0.435554	0.117873	0.295154
							0.084285	0.062454	0.136043	0.080749													0.153878	0.059944	0.145661	0.055233									0.124526	0.046053	0.184463	0.085956
							0.082096	0.070695	0.047734	0.063445													0.212068	0.056418	0.074259	0.061369									0.05528	0.056201	0.042863	0.069079
							0.103988	0.037733	0.065635	0.050756													0.08793	0.075224	0.062834	0.177971									0.041315	0.128793	0.443936	0.091058
							0.123691	0.032095	0.068021	0.066906													0.142241	0.136344	0.085683	0.421404									0.084957	0.281003	0.133946	0.106758
							0.184989	0.075032	0.273279	0.156883													0.094396	0.048191	0.048554	0.045004									0.133255	0.086643	0.055109	0.071041
							0.110556	0.165244	0.114562	0.138426													0.042672	0.135169	0.10282	0.045004									0.054117	0.058542	0.122465	0.042782
							0.093042	0.086742	0.031027	0.089977													0.14612	0.056418	0.062834	0.07978									0.076229	0.056201	0.062358	0.151502
							0.30868	1.65027	0.071601	0.160344													0.121551	0.068172	0.142805	0.090009									0.080884	0.050737	0.100278	0.14169
							0.321816	0.928574	0.050121	0.104973													0.041379	0.754594	0.059978	0.040913									0.164677	0.087423	0.083425	0.316349
							0.063487	0.425904	0.032221	0.064599													0.05431	0.083452	0.085683	0.135013									0.050625	0.089765	0.057302	0.041604
							0.036122	0.13445	0.054894	0.032299													0.042672	0.266811	0.048554	0.069552									0.04597	0.071031	0.169377	0.080068
							0.049257	0.391207	0.087115	0.154576													0.086637	0.051717	0.302747	0.083872									0.065754	0.08274	0.100278	0.037679
							0.364505	0.052045	0.058474	0.076134													0.081465	0.486607	0.085683	0.049096									0.047716	0.04137	0.045504	0.146792
							0.07115	0.031227	0.100242	0.081902													0.078769	0.044664	0.202783	0.040913									0.061099	0.228705	0.061515	0.186041
							0.036122	0.221192	0.036994	0.093438													0.073337	0.213919	0.057122	0.042959									0.369505	0.105376	0.051403	0.120495
							0.051447	0.124041	0.127689	0.039221													0.218651	0.110486	0.071403	0.149332									0.102996	0.092887	0.056459	0.175837
							0.764038	0.117969	0.070408	0.173033													0.143957	0.228024	0.194215	0.087963									0.252544	0.195141	0.042134	0.066331
							0.160908	0.527826	0.132463	0.095745													0.126302	0.161027	0.091395	0.071598									0.558622	0.094448	0.798855	0.550275
							0.061298	0.138354	0.042961	0.128044													0.047533	0.052892	0.097107	0.063415									0.053535	0.265392	0.120502	0.302219
							0.170759	0.3448	0.046541	0.086516													0.122228	0.239778	0.05141	0.096145									0.038987	0.857058	0.08511	0.359916
							0.166381	0.042504	0.147976	0.068059													0.038026	0.041138	0.239912	0.601421									0.308988	0.12411	0.130614	0.113823
							0.21126	0.653168	0.100242	0.042681													0.043459	1.64671	0.208495	0.396856									0.360777	0.156893	0.054774	0.117355
							0.09742	0.425036	0.179004	0.040374													0.042101	0.13987	0.139949	0.382536									0.051207	0.04137	0.346339	0.166024
							0.348086	0.274972	0.039381	0.039221													0.145315	0.123415	0.148517	0.063415									0.044806	0.371548	0.359822	0.081638
							0.21126	0.12621	0.17423	0.069213													0.06383	0.098732	0.037129	0.167743									0.577243	0.075715	0.053088	0.084386
							0.088663	0.318777	0.272085	0.068059													0.143957	0.237427	0.06569	0.04705									0.05528	0.061664	0.066571	0.045922
							0.170759	0.718224	0.090695	0.050756													0.052965	1.17185	0.357013	0.053588									0.105324	0.071812	0.066571	0.060444
							0.109461	0.058985	0.048928	0.038067													0.249887	0.09403	0.128525	0.076554									0.126272	0.106157	0.124716	0.057304
							0.036122	0.322681	0.151556	0.070367													0.674967	1.40223	0.202783	0.072727									0.160022	0.72124	0.064886	0.039249
							0.031744	0.293188	0.252992	0.153422													0.080127	0.077575	0.099964	0.183731									0.140237	0.245097	0.049718	0.064369
							0.037217	0.425904	0.044154	0.05191													0.07062	0.225673	0.071403	0.174161									0.139074	0.064006	0.785372	0.083993
							0.090853	0.248082	0.039381	0.121123													0.190132	0.039963	0.06569	0.082296									0.219376	0.049956	0.053931	0.067901
							0.271463	0.319645	0.045348	0.19495													0.177909	1.8383	0.125668	0.057416									0.056444	0.128012	0.223309	0.039249
							0.250666	0.294489	0.068021	0.140733													0.146673	0.064646	0.242769	0.103349									0.1961	0.204508	0.235949	0.091451
							0.090853	0.037299	0.097855	0.066906													1.26166	0.195113	0.071403	0.32727									0.092522	0.09757	0.065729	0.042782
							0.089758	0.267599	0.155136	0.07152													0.833863	0.640582	0.128525	0.044019									0.072737	0.085081	0.174434	0.100848
							0.061298	0.049009	0.126496	0.151115													0.066546	1.49273	0.165654	0.264113									0.039569	0.087423	0.05983	0.122079
							0.030649	0.038167	0.128883	0.113048													0.039384	1.22945	0.099964	0.256457									0.072737	0.045273	0.927784	0.055068
							0.654577	0.499201	0.032221	0.047296													0.366683	0.043489	0.091395	0.103349									0.078056	0.064006	0.301677	0.064357
							0.077717	0.155702	0.033414	0.050756													0.042101	0.070523	0.408422	0.080382									0.195141	0.046053	0.090166	0.08028
							0.59109	0.042504	0.150363	0.083056													0.040743	0.081101	0.159942	0.141626									0.056981	0.827397	0.311789	0.064357
							0.118218	0.381665	0.33772	0.096898													0.100498	0.287968	0.308459	0.233491									0.053859	0.06869	0.145783	0.044453
							0.087569	0.095431	0.120529	0.032299													0.573111	0.051717	0.119956	0.101435									0.04137	0.040589	0.248589	0.06502
							0.172949	0.089612	0.155136	0.085363													0.108647	0.096381	0.079971	0.091865									0.096009	0.238852	0.051403	0.141983
							0.571387	0.211229	0.430802	0.245706													0.052965	0.079926	0.062834	0.1933									0.049956	0.049956	0.048032	0.053078
							0.445507	0.053535	0.040574	0.114202													0.081485	0.164553	0.06569	0.214352									0.160796	0.195921	0.090166	0.037155
							0.08319	0.220539	0.113369	0.118816													0.196922	0.048191	0.077115	0.177989									0.245097	0.060884	0.068257	0.088906
							0.043784	0.442242	0.14559	0.177647													0.202354	0.037612	0.05141	0.074641									0.465996	0.051517	0.058987	0.091559
							0.066771	0.071573	0.040574	0.221482													1.24944	0.590041	0.1171	0.038277									0.196702	0.103815	0.038763	0.065684
							0.378735	0.059935	0.212418	0.058831													0.772749	1.19301	0.091395	0.061244									0.067909	0.06869	0.794641	0.08028
							0.052541	0.030841	0.096662	0.043835													0.055681	0.439592	0.142805	0.256457									0.038248	0.117865	0.066571	0.435902
							0.421425	0.068664	0.097855	0.168418													0.042101	0.156326	0.045698	0.116746									0.103034	0.088984	0.166849	0.083598
							0.044879	0.080884	0.033414	0.169572													0.153463	0.242128	0.179934	0.038277									0.079617	0.391062	0.051403	0.054405
							0.090853	0.18388	0.066828	0.062292													0.753736	0.424312	0.128525	0.241147									0.182652	0.105376	0.117974	0.074973
							0.14011	0.038405	0.15275	0.044988													0.096424	0.52422	0.1171	0.225836									0.071031	0.281003	0.125558	0.061703
							0.036122	0.545238	0.032221	0.088823													0.522862	0.586515	0.231344	0.055502									0.302078	0.058542	0.981715	0.417989
							0.244098	0.337501	0.054894	0.256088													0.464465	0.146923	0.302747	0.223922									0.154552	0.064006	0.205612	0.209658
							0.074434	0.078556	0.085922	0.041528													0.186057	1.48568	0.048554	0.055502									0.047614	0.168602	0.81318	0.050424
							0.14011	0.516144	0.082342	0.036914													0.251245	0.052892	0.114244	0.287079									0.063226	0.128793	0.090166	0.287948
							0.033933	0.03666	0.120529	0.048449													0.105931	0.084627	0.122812	0.244974									0.067909	0.134257	0.044662	0.161224
							0.08319	0.655217	0.054894	0.229557													0.281123	0.095206	0.037129	0.065071									0.098351	0.092887	1.93309	0.099521
							0.067866	0.206574	0.047734	0.099205													0.270259	0.563007	0.16851	0.101435									0.043712	0.038248	2.17073	0.231552
							0.273653	0.299096	0.196904	0.073827													0.16976	0.345562	0.062834	0.262199									0.057762	0.29037	0.082582	0.039145
							0.425804	0.404419	0.047734	0.081902													0.139883	0.169255	0.137093	0.038277									0.08352	0.045273	0.03792	0.064357
							0.052541	0.048298	0.099049	0.049603													0.38298	0.235076	0.094251	0.042105									0.099912	0.199044	0.042134	0.917585
							0.271463	0.411402	0.078762	0.188029													0.199638	0.52657	0.197071	0.042105									0.045273	0.053859	0.039606	0.704609
							0.032838	0.262436	0.065635	0.145347													0.076053	0.158676	0.06569	0.04976									0.096009	0.06947	0.060673	0.074309
							0.045974	0.406165	0.14917	0.426814													0.066546	0.653511	0.097107	0.082296									0.060884	0.070251	0.36235	0.101512
							0.032838	0.055862	0.118142	0.148808													0.626076	1.27764	0.071403	0.227749									0.145185	0.059323	0.83846	0.375526
							0.137921	0.0675	0.162297	0.054217													0.080127	1.29879	0.228488	0.116746									0.064006	0.039028	0.076683	0.160561
							0.364505	0.034914	0.162297	0.065752													0.040743	0.058769	0.039985	0.130143									0.125671	0.077276	0.04719	0.057722
							0.052541	0.328772	0.263732	0.043835													0.177909	0.057594	0.154229	0.070813									0.044492	0.040589	2.4901	0.161224
							0.067866	0.054117	0.15633	0.05537													0.199638	0.054067	0.079971	0.072727									0.066348	0.108498	0.096907	0.039145
							0.050352	0.3986	0.040574	0.155729													0.05704	0.048191	0.119956	0.057416									0.04137	0.086643	0.696049	0.049097
							0.043784	0.05528	0.256572	0.197257													0.085559	0.04584	0.045698	0.116746									0.216997	0.327056	0.171906	0.201033
							0.037217	0.094849	0.041767	0.084209													0.267542	0.470152	0.139949	0.047847									0.091326	0.123329	0.042134	0.040472
							0.103988	0.393945	0.14917	0.19495													0.135808	0.049366	0.139949	0.313873									0.053859	0.056981	0.160108	0.179138
							0.279126	0.046552	0.063248	0.047296													0.236307	0.614724	0.16851	0.078468									0.043712	0.042931	0.227522	0.163878
							0.041595	0.298514	0.17065	0.072674													0.103214	0.111661	0.111388	0.055502									0.049956	0.044492	0.329486	0.089569
							0.11384	0.037823	0.087115	0.038067													0.044817	0.086978	0.062834	0.089951									0.045273	0.105376	0.062358	0.638262
							0.054731	0.269419	0.127689	0.116509													0.229516	0.793382	0.485537	0.101435									0.064787	0.09679	0.053088	0.072982
							0.041595	0.262436	0.050121	0.038067													0.093708	0.098732	0.10282	0.288993									0.286467	0.062445	2.67886	0.111464
							0.089758	0.046552	0.082342	0.05191													0.043459	0.054067	0.119956	0.053588									0.054639	0.31847	0.844359	0.388796
							0.091947	0.406708	0.133656	0.070367													0.052965	0.063471	0.085683	0.177989									0.095229	0.077276	0.115446	0.101512
							0.072244	0.112627	0.031027	0.065752													0.055681	0.253882	0.119956	0.061244									0.099912	0.070251	0.044662	0.13933
							0.117123	0.299769	0.058474	0.167265													0.274333	0.056418	0.262761	0.223922									0.103034	0.091326	0.038763	0.12606
							0.291166	0.07224	0.114562	0.253781													0.2268	0.097557	0.037129	0.755975									0.164699	0.142063	0.057302	0.191081
							0.064582	0.30432	0.126496	0.047296													0.058398	0.284442	0.188503	0.045933									0.113962	0.118646	0.043043	0.09554
							0.052298	0.477242	0.035801	0.275699													0.210503	0.049366	0.142805	0.21818									0.131135	0.039809	0.091304	0.067011
							0.04137	0.063708	0.075181	0.033453													0.343595	0.173956	0.21992	0.155023									0.056201	0.159235	0.080869	0.07829
							0.071812	0.109783	0.034607	0.274545													0.09914	0.06112	0.099964	0.212439									0.215435	0.242755	0.073043	0.164542
							0.060103	0.105232	0.224351	0.033453													0.241739	0.293845	0.105676	0.045933									0.246658	0.77588	0.170869	0.070328
							0.058542	0.320816	0.17065	0.070367													0.09914	0.219796	0.131381	0.038277									0.168602	0.202946	0.061304	0.074973
							0.136599	0.051763	0.305499	0.061138													0.071978	0.111661	0.06569	0.044019									0.435554	0.486291	0.130434	0.087579
							0.148307	0.824223	0.045348	0.126891													0.093708	0.074049	0.185647	0.04976									0.814127	0.309103	0.134347	0.092223
							0.433213	0.35267	0.060861	0.496027													0.090992	0.118713	0.042842	0.199042									0.231047	0.117865	0.550433	0.461114
							0.177968	0.350963	0.083535	0.14304													0.077334	0.059944	0.242769	0.116746									0.243536	0.059323	0.943041	0.059713
							0.032784	0.105801	0.038187	0.064599													0.11668	0.06112	0.062834	0.099521									0.048395	0.043712	0.056087	0.189754
							0.078837	0.157564	0.088308	0.032299													0.232002	0.257408	0.045698	0.132056									0.049956	0.09757	0.045652	0.277996
							0.06869	0.034129	0.069215	0.073827													0.077334	1.59382	0.068546	0.141626									0.099912	0.449604	0.070435	0.116771
							0.307542	0.559152	0.15991	0.034607													0.118036	0.047015	0.042842	0.290907									0.161577	0.151429	0.131739	0.130041
							0.37467	0.361771	0.069215	0.098052													0.222505	0.065821	0.048554	0.08421									0.216216	0.04137	0.195652	0.378844
							0.164699	0.047212	0.131269	0.367983													0.040702	0.862729	0.042842	0.512915									0.571372	0.084301	0.043043	0.179138
							0.670504	0.228098	0.083535	0.252628													0.226575	0.202165	0.06569	0.099521									0.098351	0.131135	0.264782	0.592482
							0.053078	0.411258	0.082342	0.054217													0.329687	0.054067	0.131381	0.382772									0.054639	0.075715	0.526955	0.279323
							0.924967	0.161545	0.038187	0.307998													0.040702	0.051717	0.414135	0.260285									0.241975	0.103815	0.979562	0.342353
							0.052298	0.051194	0.083535	0.132658													0.229289	0.04584	0.10282	0.103349									0.060884	0.037467	0.549129	0.462441
							0.215435	0.507389	0.093082	0.184568													0.069194	0.04584	0.06569	0.210525									0.229486	0.084301	0.083478	0.157907
							0.074153	0.071103	0.084728	0.042681													0.461291	0.04584	0.145661	0.078468									0.323934	0.075715	0.097826	1.23273
							0.564347	0.050625	0.075181	0.253781													0.06241	0.038788	0.142805	0.042105									0.111621	0.077276	0.232173	0.20236
							0.668943	0.051763	0.047734	0.155729													0.040702	0.051717	0.119956	0.044019									0.078837	0.081179	0.114782	0.303871
							0.276319	0.056313	0.113369	0.29877													0.153311	0.043489	0.088539	0.078468									0.127232	0.085862	0.254347	0.072982
							0.177188	1.03127	0.070408	0.401436													0.162809	0.037612	0.242769	0.304304									0.432432	0.071031	0.60652	0.092223
							0.258366	0.047781	0.095469	0.05537													0.367676	0.041138	0.039985	0.405739									0.052298	0.093668	0.157826	0.346333
							0.079617	1.47723	0.071601	0.066906													0.166879	0.043489	0.097107	0.066985									0.398087	0.04215	0.037826	0.086915
							0.053859	0.042093	0.031027	0.348372													0.127533	0.044664	0.185647	0.040191									0.040589	0.170163	0.12913	0.079617
							0.324714	0.076791	0.385454	0.080749													0.189943	0.071698	0.119956	0.440188									0.458971	0.121416	0.469564	1.48419
							0.502683	0.278723	0.094275	0.091131													0.1913	0.059944	0.299891	0.30239									0.062445	0.274617	0.22826	0.039145
							0.034345	0.056313	0.186164	0.111894													0.188587	0.038788	0.16851	0.256457									0.044492	0.355349	0.074348	0.415998
							0.309884	0.086461	0.063248	0.111894													0.065123	0.420786	0.108532	0.047847									0.044492	0.265717	0.088695	0.07829
							0.078837	0.160977	0.063248	0.188029													0.142458	0.06112	0.188503	0.103349									0.117085	0.046405	0.856954	0.137339
							0.885159	0.058589	0.077568	0.124584													0.082761	0.086978	0.091395	0.066985									0.038248	0.088996	0.067826	0.423296
							0.153771	0.157564	0.081148	0.224942													0.052913	0.063471	0.177078	0.333012									0.053078	0.113152	0.052174	0.078953
							0.216997	0.030716	0.103822	0.128044													0.32426	0.055243	0.074259	0.204783									0.067909	0.14303	0.052174	0.037818
							0.655673	0.11604	0.068021	0.215714													0.447724	0.038788	0.06569	0.164592									0.054639	0.238383	0.061304	0.25212
							0.119426	0.036973	0.031027	0.507562													0.131604	0.10551	0.108532	0.373203									0.192019	0.047677	0.144782	0.082934
							0.190457	0.16894	0.087115	0.411818													0.594251	0.074108	0.082827	0.44593									0.096009	0.16655	0.044348	0.051088
							0.086643	0.035836	0.085922	0.164958													0.075977	0.054639	0.237056	0.118659									0.039028	0.040048	1.48173	0.197052
							0.074934	0.040386	0.377101	0.100359													0.055626	0.052755	0.111388	0.051674									0.204508	0.085182	0.455216	0.07829
							0.091326	0.104663	0.14917	0.104973													0.073264	0.338512	0.039985	0.038277									0.115523	0.06484	0.147391	0.050424
							0.050737	0.056882	0.058474	0.031146													0.194014	0.065316	0.097107	0.091865									0.071031	0.04132	0.234782	0.071655
							0.19436	0.054038	0.102629	0.039221													0.074621	0.364889	0.248481	0.040191									0.091326	0.16655	0.24913	0.194398
							0.107718	0.20762	0.083535	0.062292													0.263207	0.059663	0.094251	0.038277									0.06869	0.413833	0.275217	0.091559
							0.205288	0.069396	0.034607	0.086516													0.340541	0.111791	0.077115	0.541623									0.057762	0.068019	0.53739	0.417325
							0.48551	0.042662	0.048928	0.070367													0.276775	0.075992	0.085683	0.183731									0.123329	0.083275	0.044348	0.059049
							0.273197	0.083617	0.054894	0.034607													0.164165	0.341024	0.074259	0.08421									0.31847	0.059755	0.756519	0.045116
							0.064006	0.054038	0.033414	0.2111													0.137031	0.151357	0.245625	0.04976									0.065567	0.077554	0.482607	0.449172
							0.048395	0.047212	0.044154	0.138426													0.039345	0.100486	0.099964	0.137798									0.071031	0.532071	0.06913	0.119425
							0.077276	0.040955	0.064441	0.451038													0.042059	0.109278	0.099964	0.532053									0.718118	0.037506	0.092608	0.499596
							0.053078	0.036405	0.040574	0.07152													0.096328	0.319671	0.068546	0.065071									0.064787	0.057848	0.037826	0.046443
							0.170943	0.093856	0.052508	0.046142													0.056983	0.058407	0.062834	0.066985									0.070251	0.43926	0.383477	0.049097
							0.05542	0.074516	0.102629	0.279159													0.587468	0.336628	0.05141	0.04976									0.067909	0.162736	0.85565	0.040472
							0.080398	0.06769	0.070408	0.102666													0.071907	0.763064	0.079971	0.063157									0.066348	0.055941	0.070435	0.147291
							0.103815	0.054359	0.342493	0.116509													0.250997	0.23991	0.108532	0.189472									0.175627	0.104253	0.091304	0.227572
							0.047614	0.204453	0.144396	0.094591													0.073264	1.21086	0.162798	0.1933									0.085862	0.07819	0.247825	0.084925
							0.085081	0.047057	0.031027	0.053063													0.048843	1.24791	0.179934	0.128229									0.052298	0.084546	0.148695	0.145964
							0.130354	0.07383	0.075181	0.164958													0.321547	0.260007	0.137093	0.237319									0.039028	0.066747	0.121304	0.072982
							0.06869	0.086	0.102629	0.170726													0.040702	0.037054	0.108532	0.44593									0.117085	0.118238	0.358695	0.076963
							0.377793	0.042189	0.057281	0.138426													0.214365	0.126863	0.042842	0.095693									0.133476	0.047677	0.087391	0.102175
							0.072592	0.097359	0.038187	0.094591													0.670229	0.07034	0.139949	0.10909									0.060884	0.043227	0.104348	0.039808
							0.049956	0.100604	0.238671	0.947065													0.093615	0.614848	0.125668	0.074641									0.105376	0.06484	0.371738	0.038481
							0.060884	0.050302	0.058474	0.130351													0.480285	0.261263	0.059978	0.155023									0.19358	0.054669	0.181304	0.040472
							0.273978	0.055981	0.31624	0.056524													0.188587	0.27508	0.071403	0.177989									0.043712	0.080732	0.336521	0.122079
							0.057762	0.040566	0.103822	0.056524													0.141101	0.151985	0.177078	0.200955									0.212313	0.050855	0.074348	0.307852
							0.042931	0.068151	0.040574	0.122276													0.411092	0.037682	0.05141	0.212439									0.123329	0.076283	0.104348	0.053078
							0.178749	0.133868	0.565651	0.100359													0.088188	0.244934	0.105676	0.258371									0.074934	0.271439	0.037826	0.040472
							0.106937	0.107906	0.035801	0.119969													0.473502	0.081017	0.099964	0.153109									0.04137	0.785074	0.163043	0.12407
							0.103034	0.120076	0.039381	0.173033													0.405665	0.09923	0.108532	0.162678									0.053078	0.142394	0.322173	0.084261
							0.249	0.120887	0.227931	0.085363													0.170949	0.299573	0.054266	0.135884									0.174066	0.075647	0.050869	0.059049
							0.035906	0.069774	0.16349	0.207639													0.142458	0.049615	0.162798	0.082296									0.043712	0.229483	0.057391	0.082271
							0.042931	0.058415	0.151556	0.319534													0.077334	1.32202	0.062834	0.057416									0.088984	0.072468	0.135652	0.039145
							0.06869	0.160642	0.077568	0.031146													0.537268	0.160777	0.122812	0.040191									0.099132	0.042591	0.088695	0.08593
							0.092887	0.083566	0.032221	0.138426													0.24964	1.1468	0.050382	0.225836									0.15299	0.754561	0.044348	0.138991
							0.059323	0.20851	0.070408	0.07152													0.286272	0.042706	0.12208	0.457413									0.12411	0.407476	0.080869	0.077478
							0.091326	0.082755	0.053701	0.14304													0.497923	0.275708	0.058134	0.197128									0.115523	0.418918	0.045652	0.048835
							0.088984	0.154151	0.411708	0.056524													0.042059	0.045219	0.094951	0.08421									0.072592	0.839743	0.037826	0.068556
							0.226363	0.107906	0.040574	0.113048													0.084118	0.048359	0.094951	0.14354									0.246658	0.043227	0.079599	0.046487
							0.048395	0.145227	0.036994	0.235324													0.056983	0.101114	0.114329	0.099521									0.102254	0.11506	0.108819	0.039443
							0.408235	0.039755	0.051314	0.131505													0.343255	0.218557	0.044569	0.124401									0.053078	0.040684	0.073553	0.169043
							0.039809	0.037321	0.097855	0.05537													0.759773	0.567745	0.042631	0.342581									0.047614	0.146208	0.134008	0.149791
							0.075715	0.032453	0.056088	0.239939													0.040702	0.116815	0.085262	0.216266									0.047614	0.071833	0.041815	0.048835
							0.067909	0.133868	0.033414	0.125737													0.272704	0.039566	0.065885	0.04976									0.049175	0.03687	0.079599	0.24746
							0.107718	0.066528	0.033414	0.040374													0.044772	0.62364	0.050382	0.076554									0.10562	0.286059	0.054409	0.182191
							0.049956	0.176057	0.034607	0.059985													0.104469	0.407596	0.036818	0.120573									0.065596	0.053398	0.059951	0.145565
							0.071031	0.047868	0.096662	0.088823													0.541338	0.09609	0.044569	0.139712									0.040024	0.55432	0.078087	0.281269
							0.067909	0.333453	0.059668	0.188029													0.043416	0.081645	0.079449	0.319615									0.040024	0.043227	0.58238	0.069026
							0.410576	0.214189	0.455862	0.245706													0.325617	0.049615	0.048445	0.264113									0.05281	0.052126	0.306808	0.084052
							0.16626	0.193906	0.035801	0.179954													0.8154	0.056523	0.050382	0.053588									0.072822	0.436717	0.217637	0.077008
							0.046053	0.066528	0.032221	0.074981													0.046129	0.094205	0.058134	0.206697									0.069487	0.091539	0.601021	0.105182
							0.13894	0.230415	0.108596	0.19495													0.230645	0.053383	0.046507	0.162678									0.22347	0.11061	0.246353	0.066208
							0.156893	0.053547	0.087115	0.158036													0.056983	0.045847	0.062009	0.128229									0.048363	0.293688	0.056424	0.038504
							0.065567	0.115208	0.102629	0.116509													0.364963	0.042078	0.046507	0.139712									0.105064	0.040048	0.32041	0.089687
							0.05542	0.522491	0.243445	0.054217													0.161452	0.168942	0.106578	0.095693									0.141197	0.549234	0.087659	0.071374
							0.239633	1.36464	0.097855	0.114202													0.150598	0.08808	0.321672	0.137798									0.155651	0.125866	0.331493	0.089687
							0.053078	0.101415	0.35562	0.073827													0.043416	0.129118	0.050382	0.183731									0.17066	0.044498	1.7955	0.517929
							0.047614	0.158208	0.079955	0.063445													0.047486	0.053048	0.147272	0.16842									0.136194	0.215498	0.064989	0.045078
							0.078056	0.075453	0.034607	0.061138													0.25371	0.058053	0.248036	0.055502									0.145644	0.062297	0.0665	0.552677
							0.163138	0.079509	0.120529	0.040374													0.477572	0.116106	0.552268	0.105262									0.048363	0.038141	0.076576	0.057287
							0.036686	0.064094	0.062055	0.162651													0.037989	0.040036	0.153085	0.275596									0.037245	0.058483	0.09572	0.416503
							0.04215	0.068151	0.202871	0.081902													0.12482	0.34031	0.228659	0.118659									0.038913	0.03687	0.624699	0.192521
							0.035125	1.21455	0.042961	0.572161													0.077334	0.196179	0.038756	0.16842									0.088943	0.059755	0.483638	0.228208
							0.214655	0.372397	0.058474	0.094591													0.160095	0.19718	0.079449	0.047847									0.047251	0.165279	1.2227	0.431529
							0.094448	0.249076	0.031027	0.188029													0.043416	0.053048	0.094951	0.097607									0.060037	0.082639	0.069019	1.27674
							0.275539	0.722887	0.267312	0.216868													0.313407	0.201183	0.133707	0.244974									0.216799	0.125866	1.3557	0.346538
							0.223241	0.119264	0.33414	0.092284													0.180446	0.271247	0.279041	0.093779									0.151759	0.071197	0.159197	0.380347
							0.061664	0.101415	0.062055	0.168418													0.156025	0.053048	0.145334	0.097607									0.315192	0.107589	0.195974	0.270938
							0.077276	0.032453	0.097855	0.054217													0.19537	0.058053	0.118205	0.187558									0.045027	0.228913	0.078087	0.173269
							0.423065	0.119264	0.063248	0.040374													0.059696	0.059054	0.046507	0.08421									0.234032	0.053566	0.094712	0.654572
							0.314567	0.526548	0.041767	0.079595													0.147884	0.649592	0.164712	0.086124									0.236811	0.069589	0.650896	0.410399
							0.156113	0.069774	0.19213	0.065752													0.073264	0.144131	0.178276	0.091865									0.131191	0.040746	0.140053	0.202852
							0.211533	0.045434	0.031027	0.054217													0.06241	0.268245	0.30617	0.070813									0.067263	0.072794	0.691199	0.073252
							0.615084	0.038132	0.036994	0.049603													0.057058	0.054049	0.300357	0.063157									0.173439	0.086071	0.528979	0.228208
							0.111621	0.099793	0.176617	0.186875													0.112462	0.246224	0.10464	0.206697									0.351881	0.038915	0.052394	0.740972
							0.167041	0.11683	0.126496	0.036914													0.043	0.136124	0.110454	0.204783									0.284618	0.187251	0.046852	1.02271
							0.245877	0.062472	0.033414	0.182261													0.125692	0.19718	0.137583	0.290907									0.384123	0.063638	0.256933	0.360625
							0.032003	0.041377	0.186164	0.048449													0.095923	0.059054	0.067822	0.05933									0.066707	0.040289	1.52144	0.148852
							0.042931	0.052736	0.076375	0.043835													0.057885	0.9869	0.058134	0.151195									0.075046	0.044867	0.148618	0.049304
							0.032784	0.101415	0.114562	0.096898													0.091788	1.08799	0.168587	0.057416									0.082272	0.132769	0.083125	0.182191
							0.391843	0.0732	0.081148	0.133812													0.078558	0.174159	0.079449	0.164592									0.058925	0.054481	0.852915	0.133356
							0.060103	0.035112	0.059668	0.197257													0.085173	0.993906	0.135645	0.254544									0.050031	0.222045	1.2766	0.304747
							0.269294	0.066059	0.065635	0.078441													0.051269	0.062057	0.32361	0.317701									0.103952	0.069132	0.057432	0.080765
							0.071812	0.043444	0.031027	0.160344													0.040519	0.094086	0.048445	0.14354									0.095058	0.264623	0.056424	0.060574
							0.053078	0.035112	0.078762	0.057678													0.114115	0.187171	0.246099	0.132056									0.067819	0.059059	0.087156	0.086869
							0.037467	0.057727	0.17065	0.158036													0.048788	0.475433	0.220907	0.331098									0.13953	0.06318	0.290686	0.109878
							0.248219	0.352908	0.110982	0.05537													0.048788	0.038035	0.207343	0.246888									0.040024	0.215178	0.408069	0.043669
							0.189677	0.495737	0.153943	0.144194													0.049615	0.171156	0.257725	0.149281									0.370226	0.044409	0.402024	0.237599
							0.248219	0.410635	0.213611	0.237631													0.149673	0.112102	0.364303	0.149281									0.088943	0.086529	0.053905	1.13259
							0.067909	0.171395	0.042961	0.088823													0.040519	0.126115	0.091076	0.179903									0.075046	0.237611	0.049371	0.522155
							0.056201	0.322556	0.118142	0.034607													0.067808	0.124113	0.058134	0.04976									0.691533	0.192744	0.230232	0.568642
							0.231827	0.332078	0.039381	0.056524													0.058712	0.506462	0.166649	0.177989									0.250709	0.265996	0.043326	0.370955
							0.146746	0.037493	0.244638	0.361061													0.047135	0.816744	0.222845	0.038277									0.61204	0.047614	0.305296	0.413686
							0.199824	0.208293	0.183777	0.092284													0.05375	0.062057	0.102703	0.147367									0.133415	0.120408	0.157182	0.328225
							0.072592	0.186869	0.085922	0.074981													0.048788	0.13212	0.040693	0.248802									0.128412	0.040746	0.048546	0.144626
							0.508927	0.162468	0.052508	0.125737													0.038038	0.251229	0.05232	0.1933									0.047807	0.099348	0.043397	0.065269
							0.128793	0.077366	0.052508	0.085363													0.044654	0.100091	0.46313	0.055502									0.108955	0.121324	0.046339	0.146973
							0.044492	0.093434	0.077568	0.148808													0.267923	0.51547	0.046507	0.16842									0.055034	0.434476	0.581077	0.054469
							0.316128	0.536205	0.237478	0.032299													0.115769	0.045041	0.073636	0.181817									0.227917	0.294382	0.725978	0.047426
							0.199044	1.48483	0.118142	0.05537													0.061192	0.045041	0.079449	0.214352									0.867196	0.076457	0.037513	0.04273
							0.210752	0.044634	0.051314	0.176493													0.057885	0.209191	0.168587	0.166506									0.046695	0.037999	0.041926	0.137113
							0.053078	0.383854	0.033414	0.158036													0.062019	1.81766	0.102703	0.038277									0.217355	0.202817	1.45122	0.0864
							0.325495	0.051776	0.060861	0.072674													0.29025	0.040036	0.207343	0.10909									0.234032	0.051734	0.081645	0.059635
							0.053859	0.719503	0.17423	0.084209													0.052096	0.074068	0.389495	0.065071									0.04336	0.041204	0.565631	0.084052
							0.043712	0.467766	0.032221	0.070367													0.095923	0.13112	0.408872	0.273682									0.070599	0.072794	1.51154	0.153547
							0.132696	0.086293	0.091888	0.083056													1.75804	0.065059	0.261601	0.066985									0.046695	0.107131	0.147108	0.110348
							0.039809	0.474908	0.214804	0.068059													0.081865	0.429391	0.048445	0.066985									0.113403	0.169853	0.300836	0.096261
							0.086643	0.345171	0.078762	0.104973													0.057058	0.052047	0.220907	0.139712									0.045027	0.265539	0.038984	0.407112
							0.301297	0.036898	0.278052	0.183415													0.074423	0.151138	0.036818	0.040191									0.073378	0.054481	0.729656	0.039443
							0.053859	0.258283	0.035801	0.076134													0.088481	0.271247	0.098827	0.185645									0.131747	0.070963	0.083116	0.052591
							0.322373	0.158898	0.060861	0.050756													0.133962	0.929848	0.038756	0.197128									0.055589	0.103469	0.089736	0.038504
							0.04137	0.097005	0.047734	0.078441													0.818654	0.149136	0.077511	0.063157									0.11785	0.158408	0.138282	0.265773
							0.046053	0.241025	0.054894	0.076134													0.788885	0.06606	0.27129	0.044019									0.357996	0.052192	0.200067	0.219286
							0.033564	1.50209	0.299533	0.206486													0.109154	0.059054	0.046507	0.269854									0.048363	0.051276	0.597259	0.706224
							0.049956	0.326127	0.069215	0.258395													0.038865	0.149136	0.279041	0.042105									0.072822	0.147878	0.043397	0.421668
							0.039809	0.17199	0.306693	0.079595													0.798808	0.184168	0.096889	0.05933									0.186781	0.120866	0.328787	0.266712
							0.177188	0.0488	0.236285	0.133812													0.628462	0.146133	0.284854	0.061244									0.06226	0.080577	0.045604	0.321651
							0.108498	0.070224	0.041767	0.032299													0.366327	0.043039	0.153085	0.101435									0.075602	0.042578	2.06981	0.130539
							0.131135	0.057727	0.035801	0.07152													0.213346	0.068062	0.156961	0.040191									0.055589	0.13048	1.86607	0.594468
							0.09679	0.057727	0.036994	0.050756													0.262962	0.128117	0.093014	0.369375									0.112291	0.080119	2.62956	0.062922
							0.159235	0.041659	0.066828	0.069213													0.039692	0.079072	0.25385	0.269854									0.06504	0.08836	0.225811	0.042261
							0.084301	0.163064	0.062055	0.057678													0.128173	0.139127	0.044569	0.089708									0.189004	0.048072	0.06767	0.121147
							0.183432	0.0488	0.053701	0.050756													0.039692	0.259236	0.131769	0.122103									0.113403	0.040746	0.094149	0.058695
							0.273197	0.133903	0.044154	0.058831													0.289423	0.345315	0.075574	0.038624									0.040024	0.107589	0.075025	0.22633
							0.053859	0.125571	0.279245	0.048449													0.152981	0.114104	0.071698	0.044854									0.075046	0.148793	0.552391	0.050243
							0.044492	0.076176	0.046541	0.309152													0.232365	0.929848	0.133707	0.099676									0.192895	0.061349	1.17613	0.093443
							0.06869	0.139854	0.035801	0.316073													0.104192	0.060055	0.077511	0.038624									0.058925	0.13689		0.418851
							0.067909	0.286849	0.059668	0.199564													0.080212	0.106097	0.040693	0.077249									0.279059	0.048529		0.256382
							0.171724	0.051776	0.258958	0.049603													0.112462	0.46042	0.125956	0.097184									0.115626	0.042578		0.547511
							0.056981	0.21841	0.14559	0.167265													0.367981	0.067061	0.094951	0.041116									0.067819	0.593341		0.454538
							0.079617	0.082722	0.039381	0.070367													0.439923	1.51838	0.060071	0.056068									0.109511	0.143299		0.048365
							0.161577	0.204722	0.032221	0.089977													0.326635	1.28817	0.073636	0.064789									0.166213	0.22113		0.089687
							0.117085	0.076176	0.18855	0.062292													0.055404	0.048044	0.277103	0.037378									0.170104	0.045783		0.358277
							0.210752	0.11962	0.142009	0.095745													0.287769	0.521475	0.060071	0.240468									0.053366	0.061806		0.063391
							0.098351	0.040509	0.132463	0.048449													0.415116	0.245224	0.077511	0.079741									0.152315	0.386862		0.108939
							0.031223	0.158239	0.032221	0.039221													0.299346	0.049045	0.0872	0.290306									0.042804	0.234864		0.177495
							0.114743	0.119629	0.050121	0.054226													0.276192	0.048044	0.211218	0.071019									0.112291	0.060433		0.048835
							0.063226	0.110767	0.099049	0.048104													0.164558	0.092084	0.063947	0.062297									0.186781	0.119035		0.079826
							0.04215	0.03418	0.125302	0.111077													0.046308	0.269245	0.195716	0.173187									0.068931	0.123155		0.246521
							0.167821	0.134186	0.093082	0.109328													0.037212	0.435397	0.125956	0.044854									0.176775	0.478885		0.343721
							0.049956	0.370912	0.139623	0.132068													0.086827	0.572522	0.186027	0.067281									0.053922	0.086071		0.059165
							0.059323	0.103805	0.090695	0.072594													0.039692	0.074068	0.110454	0.049838									0.066707	0.136432		0.053061
							0.117865	0.222167	0.15633	0.055976													0.060365	0.136124	0.094951	0.147022									0.053366	0.17901		0.077008
							0.075715	0.122793	0.056088	0.051603													0.051269	0.072066	0.180214	0.272863									0.166768	0.08836		0.068087
							0.030442	0.053801	0.039381	0.097958													0.448192	0.037034	0.114329	0.041116									0.066151	0.068216		0.106121
							0.056981	0.577255	0.071601	0.043731													0.133135	0.063057	0.189903	0.068527									0.103396	0.125444		0.10489
							0.053078	0.512061	0.047734	0.224778													0.102539	0.272248	0.124018	0.05233									0.168992	0.14742		0.041179
							0.032784	0.215205	0.070408	0.099707													0.108327	0.212193	0.164712	0.056068									0.041692	0.11583		0.049726
							0.053547	0.045573	0.060861	0.044606													1.12792	0.047043	0.162774	0.105906									0.057813	0.04212		0.179478
							0.113585	0.143681	0.033414	0.034985													0.563962	0.103094	0.06976	0.312733									0.106732	0.062264		0.075365
							0.051925	0.131022	0.079955	0.041107													0.038865	0.071065	0.211218	0.261649									0.087831	0.20831		0.065265
							0.073019	0.287362	0.125302	0.035859													0.081865	0.042038	0.093014	0.418638									0.088943	0.415247		0.093235
							0.231227	0.065194	0.039381	0.090961													0.576366	0.23021	0.050382	0.047346									0.057257	0.062264		0.141407
							0.065717	0.04937	0.073988	0.055101													0.429173	0.334305	0.054258	0.077249									0.039469	0.051734		0.094012
							0.099793	0.482312	0.063248	0.106704													0.13975	0.158144	0.071698	0.082233									0.042804	0.037084		0.1484
							0.063283	0.86335	0.150363	0.103205													0.052096	0.043039	0.118205	0.079741									0.21124	0.274237		0.160054
							0.056792	0.494338	0.15275	0.06822													0.049615	0.054049	0.071698	0.063543									0.140086	0.097517		0.202787
							0.075453	0.374709	0.050121	0.055976													0.192673	0.247225	0.042631	0.118365									0.127964	0.224334		0.077696
							0.062472	0.046206	0.031027	0.153059													0.055404	0.102093	0.354614	0.331422									0.144476	0.063638		0.428883
							0.150906	0.17343	0.068021	0.044606													0.194327	0.785716	0.106578	0.204335									0.038699	0.130938		0.14063
							0.219868	0.404458	0.076375	0.043731													0.047962	0.165151	0.085262	0.042362									0.054178	0.083782		0.077696
							0.039755	0.094943	0.15633	0.090961													0.049615	0.098089	0.065885	0.047346									0.074818	0.135974		0.133637
							0.149283	0.031648	0.097855	0.046355													0.045481	0.627572	0.137583	0.130825									0.191431	0.546643		0.075365
							0.080321	0.039876	0.050121	0.042856													0.059538	0.478436	0.048445	0.112135									0.219294	0.121324		0.310008
							0.359415	0.115198	0.101435	0.090086													0.052096	0.073924	0.114329	0.57812									0.067078	0.11583		0.55475
							0.033264	0.482312	0.180197	0.062973													0.238154	0.318326	0.036818	0.08597									0.079978	0.374501		0.123537
							0.143604	0.366481	0.033414	0.075217													0.071115	0.696999	0.094951	0.0461									0.101649	0.049903		0.063711
							0.062472	0.08355	0.068035	0.039358													0.176962	0.087502	0.065885	0.201844									0.088234	0.050361		0.042733
							0.064094	0.430409	0.062155	0.052477													0.424212	0.051294	0.065885	0.037378									0.303399	0.16848		0.047395
							0.112774	0.500667	0.110031	0.213408													0.05375	0.040734	0.12208	0.132071									0.056758	0.167106		0.133637
							0.090868	0.051902	0.034437	0.060349													0.294385	0.057329	0.094951	0.037378									0.093393	0.038457		0.21988
							0.036509	0.148111	0.12263	0.062973													0.207558	0.117675	0.186027	0.265387									0.054694	0.041662		0.125091
							0.053547	0.235459	0.099952	0.048104													0.1505	0.10108	0.182152	0.127087									0.105261	0.091565		0.199679
							0.185793	0.136085	0.090713	0.222154													0.137269	0.256471	0.048445	0.048592									0.071206	0.161612		0.052056
							0.171189	0.041775	0.212503	0.089211													0.079385	0.049786	0.28873	0.066035									0.122805	0.15005		0.654201
							0.097359	0.212673	0.048716	0.207285													0.088481	0.184056	0.063947	0.350111									0.043859	0.047669		0.059049
							0.28234	0.182291	0.101632	0.191542													0.042173	0.11164	0.153085	0.166957									0.093909	0.043877		0.118875
							0.049491	0.03861	0.081473	0.082214													0.271231	0.04526	0.127894	0.063543									0.12848	0.09263		0.060603
							0.129	0.032914	0.066355	0.080465													0.177789	0.087502	0.065885	0.048592									0.052631	0.085046		0.480162
							0.319661	0.058144	0.068874	0.069095													0.088481	0.051294	0.13952	0.057314									0.047471	0.065545		1.31695
							0.255566	0.04719	0.083153	0.072594													0.092615	0.165952	0.054258	0.037378									0.062434	0.05742		0.097897
							0.045434	0.037078	0.111711	0.143438													0.068635	0.042242	0.091076	0.03987									0.278116	0.787628		0.125868
							0.046245	0.094379	0.149508	0.205536													0.049615	0.037716	0.040693	0.089708									0.168211	0.399231		0.254066
							0.039755	0.139041	0.275498	0.049853													0.046308	0.110132	0.120143	0.713928									0.043343	0.155467		1.4669
							0.076264	0.092694	0.054596	0.04723													0.058712	0.076941	0.056196	0.504609									0.060886	0.03846		1.40863
							0.036509	0.401113	0.057955	0.06997													0.054577	0.061855	0.249974	0.523298									0.058822	0.082338		0.229981
							0.076264	0.054774	0.041997	0.041982													0.05375	0.283627	0.0872	0.124595									0.067078	0.213429		0.123537
							0.180925	0.101121	0.117591	0.030612													0.101712	0.048277	0.230596	0.10466									0.197106	0.03846		0.438206
							0.046245	0.055616	0.068874	0.043731													0.076077	0.085993	0.081387	0.03987									0.13364	0.062295		0.080804
							0.043811	0.031179	0.131869	0.099707													0.042173	0.173495	0.056196	0.05856									0.051083	0.076921		0.265721
							0.070585	0.056459	0.074754	0.031486													0.05375	0.039225	0.063947	0.20309									0.111453	0.06067		0.159277
							0.387812	0.03455	0.227622	0.038483													0.057885	0.066381	0.083325	0.123349									0.044891	0.206928		0.076142
							0.401604	0.083425	0.064675	0.095334													0.081865	0.05582	0.044569	0.209319									0.038699	0.056337		0.101782
							0.043811	0.226679	0.052916	0.191542													0.037212	0.037716	0.040693	0.171941									0.120225	0.062837		0.05361
							0.126566	0.34044	0.107511	0.060349													0.079385	0.081467	0.284854	0.260403									0.597511	0.621868		0.203564
							0.079509	0.38763	0.073914	0.055976													0.113289	0.161426	0.040693	0.119611									0.524241	0.049836		0.250182
							0.272604	0.155052	0.033597	0.04548													0.131481	0.043751	0.056196	0.03987									0.204846	0.197178		0.160054
							0.113585	0.099436	0.064675	0.09271													0.041346	0.452597	0.036818	0.084724									0.120225	0.257848		0.407128
							0.089245	0.064043	0.066355	0.19504													0.048788	0.354534	0.062009	0.066035									0.144476	0.165759		0.247074
							0.197151	0.096065	0.033597	0.048979													0.206731	1.81793	0.248036	0.072265									0.240449	0.039002		0.059049
							0.602812	0.41291	0.062995	0.078716													0.111635	0.04526	0.176338	0.079741									0.037151	0.483194		0.082358
							0.05517	0.096065	0.224262	0.07959													0.047135	0.834286	0.038756	0.355095									0.097005	0.046044		1.54382
							0.162264	0.169377	0.086513	0.083964													0.119904	0.555185	0.056196	0.102168									0.434976	0.056337		0.073034
							0.164698	0.206455	0.043676	0.0586													0.071942	0.054312	0.124018	0.42736									0.048503	0.061753		0.121206
							0.03083	0.03455	0.088193	0.049853													0.164558	0.407337	0.056196	0.0461									0.100617	0.393272		0.080027
							0.037321	0.168535	0.081473	0.08134													0.165385	0.04526	0.18409	0.079741									0.076366	0.500528		0.191132
							0.063283	0.064886	0.078954	0.103205													0.105019	0.067889	0.05232	0.043608									0.304947	0.115382		1.44748
							0.066528	0.160108	0.051236	0.204661													0.070288	3.50913	0.073636	0.14453									0.202266	0.098047		0.131306
							0.305868	0.669083	0.112551	0.044606													0.07525	0.069398	0.172463	0.372538									0.117129	0.05417		0.233088
							0.062472	0.735654	0.085673	0.258013													0.114942	0.351517	0.205405	0.147022									0.299272	0.065545		0.127422
							0.065717	0.033707	0.094912	0.085713													0.038038	0.07845	0.100765	0.297782									0.142412	0.077463		0.090904
							0.150906	0.099436	0.148668	0.117199													0.197635	0.116166	0.036818	0.193122									0.207426	0.117007		0.293691
							0.268547	0.580602	0.042837	0.135566													0.038865	1.72288	0.224783	0.28283									0.697612	0.340186		0.056718
							0.215812	0.648016	0.053756	0.134692													0.156289	0.158409	0.094951	0.158235									0.053662	0.2871		1.21983
							0.054359	0.712902	0.089873	0.080465													0.066154	0.301731	0.215094	0.113381									0.098037	0.160884		0.494924
							0.277472	0.15758	0.072234	0.222154													0.104192	1.44378	0.05232	0.637925									0.208458	0.486444		0.068373
							0.086	0.060673	0.052916	0.061223													0.109154	0.220264	0.089138	0.048592									0.059854	0.112673		0.05361
							0.491661	0.525829	0.176386	0.03411													0.071942	0.188582	0.156961	0.05856									0.08101	0.094797		0.358956
							0.246642	0.060673	0.312455	0.055101													0.060365	0.279101	0.046507	0.487166									0.074302	1.24699		0.282814
							0.085189	0.068257	0.220062	0.118948													0.043827	0.066381	0.151147	0.059805									0.125384	0.076379		0.052056
							0.070585	0.26797	0.096592	0.13819													0.059538	0.181039	0.178276	0.089708									0.094425	0.328268		0.045064
							0.09817	0.306733	0.041997	0.034985													0.040519	0.199142	0.042631	0.042362									0.072238	0.045503		0.26339
							0.047868	0.185388	0.038637	0.042856													0.195981	0.226298	0.127894	0.047346									0.049019	0.502153		0.067596
							0.07383	0.433134	0.034437	0.072594													0.058712	2.46514	0.20153	0.090954									0.239417	0.088297		0.108775
							0.043	0.121345	0.12263	0.41632													0.492019	0.588376	0.344926	0.095938									0.08359	0.356978		0.088574
							0.05517	0.036235	0.042837	0.154808													0.155462	0.384707	0.255788	0.176925									0.07327	0.148967		0.138299
							0.216623	0.089323	0.111711	0.202912													0.125692	0.049786	0.071698	0.076003									0.141896	0.058503		0.301461
							0.121698	0.117974	0.043676	0.040233													0.258	0.419406	0.222845	0.0461									0.038183	0.069879		0.06138
							0.086	0.035392	0.347732	0.034985													0.080212	0.147848	0.050382	0.057314									0.115581	0.102381		0.107221
							0.031642	0.086795	0.345212	0.0586													0.210039	0.04526	0.073636	0.0461									0.164599	0.072046		0.049726
							0.051113	0.20477	0.092393	0.174924													0.212519	0.131253	0.075574	0.043608									0.208458	0.130549		0.070703
							0.127377	0.039606	0.314135	0.218655													0.124039	0.061855	0.044569	0.077249									0.084622	0.046586		0.042733
							0.305057	0.405326	0.065515	0.080465													0.057058	0.117675	0.131769	0.042362									0.153248	0.051731		0.585829
							0.123321	0.598298	0.108351	0.118074													0.045481	0.104097	0.151147	0.107152									0.049535	0.066853		0.081581
							0.096547	0.419652	0.041997	0.176673													0.148019	0.244402	0.044569	0.069773									0.245394	0.05969		0.050502
							0.071396	0.14494	0.087353	0.086587													0.043584	0.155391	0.054258	0.042362									0.043951	0.078791		0.052833
							0.173623	0.058144	0.080634	0.12682													0.052664	0.223281	0.038756	0.148268									0.994854	0.055711		0.07148
							0.218245	0.173591	0.214183	0.083089													0.046308	1.81944	0.106578	0.0461									0.181299	0.0963		0.059826
							0.510321	0.032864	0.041157	0.381335													0.122581	0.129744	0.455379	0.0461									0.038915	0.140869		0.135191
							0.049491	0.051403	0.055436	0.481916													0.059021	0.727172	0.337174	0.252927									0.208768	0.128931		0.062934
							0.473812	0.129772	0.108351	0.304368													0.046308	0.125218	0.05232	0.316471									0.308116	0.042181		0.150425
							0.145227	0.332856	0.097432	0.04548													0.164349	0.152374	0.377868	0.073511									0.046698	0.140869		0.038623
							0.038943	0.04719	0.191505	0.075217													0.055388	0.248928	0.056196	0.071019									0.092938	0.117788		0.119933
							0.054359	0.17949	0.217543	0.173175													0.037228	0.081467	0.153085	0.095938									0.093854	0.099483		0.040655
							0.108717	0.048875	0.101632	0.122447													0.144373	0.14634	0.091076	0.037378									0.128191	0.046956		0.105704
							0.37483	0.031404	0.065515	0.062973													0.04086	0.090519	0.356552	0.090954									0.247683	0.159969		0.066404
							0.075453	0.032328	0.035277	0.283377													0.048124	2.66579	0.300357	0.054822									0.212431	0.226027		0.040655
							0.081132	0.045259	0.061315	0.304368													0.066285	0.405828	0.106578	0.078495									0.255924	0.072424		0.052852
							0.308302	0.205052	0.146148	0.118074													0.164349	0.351517	0.232534	0.095938									0.053108	0.217272		0.060306
							0.049491	0.04803	0.12683	0.218655													0.057204	0.04526	0.151147	0.080987									0.127275	0.189417		0.052174
							0.041377	0.230914	0.074754	0.246643													0.092617	0.04526	0.145334	0.039594									0.055397	0.04616		0.039978
							0.130623	0.074816	0.074754	0.202912													0.234266	0.052803	0.10464	0.060333									0.047614	0.081179		0.138228
							0.143604	0.034175	0.068874	0.161805													0.245162	0.039225	0.036818	0.106526									0.097059	0.043773		0.082666
							0.085189	0.0859	0.043676	0.109328													0.051756	0.220264	0.147272	0.048078									0.048529	0.070036		0.075213
							0.133057	0.099755	0.097432	0.108453													0.062653	0.046768	0.094951	0.133864									0.116288	0.084362		0.548848
							0.176057	0.175495	0.048716	0.12682													0.081721	0.060346	0.108516	0.076359									0.087902	0.51811		0.062338
							0.158208	0.202281	0.031078	0.084838													0.085353	0.072415	0.040693	0.094271									0.645076	0.577004		0.048109
							0.164698	0.100678	0.030238	0.03411													0.078997	0.167461	0.06976	0.138578									0.432645	0.62396		0.059628
							0.055981	0.084976	0.047876	0.064722													0.082629	0.092028	0.036818	0.112182									0.331465	0.310389		0.077245
							0.033264	0.083129	0.178066	0.265885													0.169798	0.084485	0.094951	0.137635									0.108047	0.10983		0.047431
							0.097359	0.184731	0.141949	0.327108													0.04994	0.138796	0.085262	0.078245									0.106673	0.089137		0.107059
							0.064906	0.064656	0.2545	0.385708													0.111685	0.064872	0.12208	0.167802									0.220672	0.349386		0.054207
							0.038132	0.068351	0.057115	0.557133													0.049032	0.265523	0.0872	0.073531									0.173058	0.321531		0.064371
							0.057604	0.042488	0.356971	0.729434													0.482152	0.063364	0.147272	0.083901									0.259129	0.397934		0.073857
							0.042189	0.233685	0.034437	0.383959													0.056296	0.079959	0.189903	0.047135									0.082409	0.076403		0.5231
							0.064094	0.126541	0.116751	0.09271													0.039044	0.051294	0.116267	0.185713									0.204648	0.403505		0.050142
							0.088434	0.059114	0.309095	0.057725													0.05448	0.260997	0.093014	0.067875									0.323682	0.530048		0.312369
							0.121698	0.046183	0.035277	0.062973													0.055388	0.052803	0.06976	0.306379									0.096143	0.088341		0.180239
							0.078698	0.067427	0.444324	0.186294													0.055388	0.229316	0.067822	0.131036									0.27149	0.276962		0.048109
							0.200396	0.048954	0.110871	0.19679													0.088077	0.049786	0.05232	0.056562									0.41479	0.304817		0.046076
							0.041377	0.043412	0.082313	0.114575													0.166165	0.135779	0.327486	0.222478									0.581896	0.810989		0.049464
							0.105472	0.397172	0.147828	0.054226													0.199762	0.153883	0.135645	0.111239									0.121782	0.370079		0.075213
							0.036509	0.132083	0.131869	0.146062													0.28239	0.155391	0.062009	0.203624									0.085155	0.130522		0.052852
							0.053547	0.045259	0.162107	0.048104													0.25969	0.957996	0.085262	0.119724									0.321851	0.474337		0.05624
							0.052736	0.060038	0.087353	0.065597													0.048124	0.039225	0.238347	0.109354									0.175347	0.105055		0.037945
							0.124944	0.147785	0.149508	0.148686													0.142557	0.245911	0.079449	0.108411									0.488042	0.067649		1.08008
							0.194717	0.115457	0.312455	0.144312													0.155269	0.411863	0.27129	0.043364									0.090293	0.065261		0.166687
							0.044623	0.031404	0.240221	0.238772													0.089893	0.057329	0.040693	0.262072									0.048297	0.042977		0.050142
							0.219868	0.083129	0.057115	0.097958													0.404064	0.844847	0.207343	0.137635									0.044097	0.043773		0.152458
							0.072208	0.152403	0.055436	0.034985													0.072641	0.042242	0.073636	0.086729									0.066495	0.117788		0.080633
							0.152528	0.083129	0.066355	0.077841													0.279666	0.087502	0.05232	0.11501									0.048297	0.286512		0.464827
							0.062472	0.761092	0.076434	0.753048													0.0454	0.191599	0.155023	0.164973									0.048297	0.037406		0.496674
							0.178491	0.544033	0.073074	0.267634													0.136201	0.167461	0.298419	0.048078									0.046897	0.237169		0.042688
							0.033264	0.14409	0.043676	0.108453													0.059021	0.049786	0.439877	0.06976									0.056696	0.081179		0.733152
							0.099793	0.146861	0.161267	0.278129													0.350491	0.066381	0.042631	0.039594									0.052496	0.080383		0.2419
							0.217434	0.055419	0.062155	0.139939													0.179786	0.105606	0.075574	0.049021									0.054596	0.08277		1.04281
							0.066352	0.057267	0.144468	0.383959													0.128029	0.232333	0.058134	0.06976									0.065095	0.206926		0.055562
							0.191817	0.12377	0.239381	0.091835													0.278758	0.232333	0.063947	0.086729									0.55156	0.113013		0.050142
							0.094099	0.09606	0.132709	0.230025													0.364111	0.475226	0.062009	0.049021									0.056696	0.041385		0.264938
							0.115814	0.156098	0.138589	0.125071													0.119857	0.371129	0.265476	0.117838									0.085394	0.111422		0.140261
							0.062733	0.415645	0.136069	0.076092													0.053572	0.22479	0.071698	0.176286									0.113392	0.439319		0.552236
							0.051875	0.734306	0.210823	0.188918													0.041768	0.042242	0.085262	0.038651									0.225384	0.042977		0.425527
							0.212326	0.039717	0.079794	0.133817													0.345951	0.184056	0.058134	0.048078									0.125991	0.383608		0.0393
							0.063939	0.062809	0.220902	0.35772													0.754555	0.171987	0.075574	0.076359									0.153989	0.077995		0.094561
							0.068765	2.00064	0.218382	0.327983													0.120765	0.244402	0.672411	0.106526									0.267381	0.1926		0.039442
							0.038605	0.177342	0.052916	0.046355													0.04086	0.046768	0.327486	0.039594									0.524962	0.347794		0.341328
							0.086861	1.23862	0.066355	0.140814													0.112593	0.197634	0.077511	0.058448									0.043397	0.269799		0.059669
							0.065146	0.032328	0.056275	0.072594													0.047216	1.65801	0.118205	0.060333									0.065795	0.184641		0.224012
							0.056701	0.522789	0.067195	0.315738													0.0454	0.592902	0.042631	0.040536									0.086794	0.287308		0.139565
							0.06032	0.048954	0.062995	0.031486													0.25061	0.669843	0.044569	0.082958									0.842739	0.462399		0.038937
							0.100131	0.302959	0.105832	0.037609													0.039044	0.168969	0.071698	0.086729									0.28278	0.346998		0.045005
							0.056701	0.185655	0.154548	0.209034													0.151637	0.132762	0.077511	0.131979									0.061596	0.124951		0.220473
							0.240073	0.207823	0.062995	0.07959													0.608365	0.206686	0.127894	0.063161									0.040597	0.12336		0.142599
							0.066352	0.045259	0.180586	0.08134													0.226094	0.064872	0.153085	0.061276									0.13789	0.068445		0.515279
							0.091686	0.068351	0.197384	0.12682													0.043584	0.215738	0.162774	0.164031									0.437468	0.362916		0.114282
							0.139942	0.077587	0.097432	0.18542													0.05448	1.63991	0.137583	0.13952									0.13649	0.247515		0.112765
							0.057907	0.162563	0.051236	0.075217													0.315079	0.099571	0.13952	0.049021									0.069995	0.144848		0.039442
							0.069971	0.045259	0.090713	0.100581													0.503944	0.288153	0.063947	0.182885									0.049696	0.43534		0.173951
							0.094099	0.138548	0.050396	0.041107													0.245162	0.689455	0.143396	0.123494									0.052496	0.068445		0.10518
							0.218358	0.207823	0.084833	0.031486													0.120765	0.150866	0.060071	0.052791									0.095193	0.099483		0.057647
							0.115814	0.04803	0.038637	0.156557													0.078997	0.043751	0.207343	0.091442									0.089594	0.058894		0.099617
							0.069971	0.04803	0.037797	0.506405													0.121673	0.48277	0.116267	0.068817									0.086094	0.072424		0.084953
							0.195437	0.120075	0.170506	0.03411													0.166165	0.132762	0.168587	0.050906									0.212785	0.11938		0.061692
							0.221977	0.060961	0.055436	0.469671													1.4283	0.621566	0.077511	0.044307									0.395471	0.089137		0.038431
							0.186992	0.071121	0.315815	0.076092													0.210658	0.132762	0.129832	0.057505									0.120391	0.083566		0.05259
							0.127878	0.03787	0.039477	0.062973													0.151637	2.20565	0.180214	0.060333									0.072795	0.470358		0.041971
							0.16407	0.212441	0.073914	0.226527													0.157085	0.494839	0.162774	0.141406									0.063695	0.184641		0.112259
							0.038605	0.034175	0.234341	0.180172													0.146189	0.039225	0.327486	0.0905									0.079794	0.166336		0.112259
							0.038605	0.117304	0.066355	0.469671													0.169798	0.250437	0.180214	0.048078									0.057396	0.038998		0.533989
							0.102544	0.070198	0.090713	0.559757													1.53635	0.04526	0.228659	0.067875									0.057396	0.264228		0.039442
							0.109782	0.044335	0.041997	0.046355													0.078089	0.254963	0.044569	0.198911									0.092393	0.62396		0.041971
							0.098925	0.061885	0.033597	0.24227													0.513932	0.514451	0.071698	0.10464									0.125291	0.638286		0.916276
							0.059114	0.038794	0.088193	0.076092													0.184326	0.061855	0.102703	0.065047									0.048297	0.054119		0.339305
							0.04343	0.077276	0.032757	0.054226													0.05448	0.17953	0.089138	0.072588									0.046897	0.043773		0.320596
							0.41862	0.158454	0.151188	0.098832													0.46036	0.049786	0.054258	0.066932									0.041315	0.087545		0.442968
							0.062733	0.046053	0.058795	0.065597													0.047216	0.260997	0.137583	0.076359									0.061099	0.04616		0.278625
							0.160451	0.114743	0.12263	0.061223													0.381363	0.141814	0.180214	0.123494									0.120453	0.097892		0.502132
							0.055494	0.074934	0.699664	0.119823													0.061745	0.075433	0.406935	0.064104									0.048298	0.319939		0.053095
							0.06032	0.04215	0.084833	0.302619													0.179786	0.110132	0.046507	0.049021									0.264764	0.098688		0.06422
							0.238867	0.030442	0.201584	0.348099													0.562057	0.070907	0.131769	0.057505									0.10416	0.055902		0.44853
							0.042224	0.056981	0.203264	0.055976													0.212474	0.048277	0.158898	0.130093									0.073319	0.051244		0.06776
							0.094099	0.078837	0.214183	0.03411													0.093525	0.251945	0.085262	0.042422									0.054117	0.11731		0.053601
							0.250931	0.206849	0.050396	0.178423													0.762727	0.555185	0.085262	0.094271									0.35554	0.078771		0.123384
							0.124259	0.036686	0.055436	0.03411													0.390443	0.075433	0.058134	0.851263									0.64067	0.05929		0.126924
							0.037398	0.057762	0.043676	0.032361													0.19613	0.304748	0.071698	0.175343									0.218794	0.071995		0.092032
							0.03016	0.096009	0.092393	0.041107													0.252426	0.07845	0.182152	0.098041									0.100668	0.049973		0.057647
							0.115814	0.214655	0.036957	0.134692													0.179786	0.122201	0.187965	0.342202									0.043642	0.347694		0.081413
							0.068765	0.045273	0.054596	0.122447													0.059021	0.152374	0.077511	0.071646									0.12569	0.038115		0.070794
							0.203881	0.328617	0.066355	0.260637													0.339595	0.423932	0.230596	0.054677									0.047134	0.04235		0.177491
							0.174928	1.04908	0.045356	0.041107													0.365019	0.048277	0.058134	0.188541									0.073901	0.036845		0.057141
							0.061526	0.076495	0.179746	0.144312													0.122581	0.039225	0.296481	0.064104									0.037823	0.056749		0.090515
							0.182166	0.092887	0.177226	0.06997													0.053572	0.386216	0.083325	0.039594									0.068664	0.038962		0.08293
							0.049462	0.857058	0.25366	0.03411													1.65621	0.040289	0.308108	0.065047									0.210065	0.119427		0.138554
							0.213533	1.05844	0.292297	0.080465													0.18251	0.055957	0.062009	0.120666									0.16875	0.063102		0.081919
							0.376397	0.452727	0.083993	0.030612													0.495772	0.081697	0.102703	0.128208									0.151294	0.04955		0.058658
							0.142355	0.072592	0.047036	0.133817													0.068101	0.074982	0.215094	0.088614									0.41082	0.050397		0.043993
							0.083242	0.075715	0.062995	0.041982													0.072641	0.172346	0.063947	0.043364									0.04597	0.04235		0.085964
							0.039811	0.113182	0.091553	0.098832													0.157993	0.087292	0.147272	0.156489									0.917653	0.038539		0.108214
							0.334173	0.050737	0.090713	0.101456													0.235174	1.21426	0.046507	0.079187									0.100668	0.078771		0.085964
							0.049462	0.149088	0.297336	0.258888													0.640146	0.058195	0.102703	0.666493									0.064009	0.091053		0.135014
							0.033779	0.183432	0.088193	0.055101													0.230634	0.079458	0.038756	0.076359									0.154785	0.04235		0.088492
							0.436716	0.247439	0.038637	0.120698													0.073549	2.97577	0.155023	0.127265									0.107651	0.049973		0.0713
							0.115814	0.279442	0.204944	0.070844													0.096249	0.070505	0.166649	0.458155									0.10416	0.07496		0.246768
							0.161658	0.250561	0.047036	0.059474													0.121673	0.238375	0.065885	0.041479									0.051789	0.075807		0.119844
							0.237661	0.242755	0.068035	0.040233													0.055388	0.221588	0.073636	0.038651									0.048879	0.23589		0.776205
							0.112195	0.533905	0.153708	0.123322													0.506668	0.118628	0.036818	0.070703									0.094267	0.04108		0.084447
							0.048256	0.192019	0.041157	0.14956													0.153453	0.191371	0.079449	0.052791									0.045388	0.069454		0.040959
							0.049462	0.700946	0.067195	0.057725													0.084445	0.040289	0.060071	0.52603									0.187953	0.243936		0.039948
							0.442748	0.195921	0.047036	0.099707													0.769083	0.036931	0.05232	0.067875									0.396273	0.048279		0.154735
							0.147181	0.292711	0.032757	0.03411													0.124397	0.098484	0.166649	0.350686									0.126854	0.171518		0.068771
							0.21112	0.112401	0.042837	0.16268													0.163441	1.87454	0.100765	0.05562									0.111724	0.183376		0.155747
							0.428272	0.122548	0.084833	0.061223													0.197946	0.042527	0.131769	0.202682									0.666855	0.075383		0.276096
							0.080829	0.303639	0.039477	0.033236													0.043584	0.040289	0.071698	0.05939									0.060517	0.082159		0.099112
							0.097718	0.106937	0.097432	0.179297													0.225186	0.141011	0.048445	0.047135									0.039569	0.104181		0.13198
							0.050669	0.073373	0.031917	0.175799													0.177062	2.56169	0.127894	0.071646									0.597609	0.113075		0.055624
							0.293155	0.032003	0.351092	0.044606													0.066213	0.057076	0.217032	0.145177									0.097759	0.120274		0.058658
							1.53454	0.035293	0.108351	0.064722													0.084271	0.062671	0.067822	0.118781									0.380561	0.079195		0.05613
							0.529609	0.049288	0.279698	0.032361													0.097513	0.10296	0.060071	0.098984									0.114634	0.040233		0.048039
							0.143562	0.051114	0.046196	0.057725													0.043339	0.073863	0.046507	0.312035									0.308988	0.041503		0.075345
							0.065146	0.04868	0.162107	0.031486													0.072232	0.087292	0.058134	0.29978									0.155367	0.063949		0.593658
							0.373984	0.095534	0.097432	0.090518													0.145668	0.982597	0.065885	0.062219									0.054117	0.048703		0.095066
							0.045843	0.11318	0.036117	0.142243													0.117979	0.937832	0.048445	0.066932									0.410238	0.038115		0.166366
							0.113402	0.073628	0.225102	0.050801													0.081863	0.101841	0.056196	0.182885									0.208901	0.038115		0.127935
							0.118227	0.235488	0.064675	0.034175													0.060193	0.166751	0.050382	0.273385									0.08903	0.043621		0.14715
							0.041018	0.228794	0.153708	0.038794													0.062601	1.92603	0.050382	0.154604									0.175151	0.082159		0.08647
							0.053082	0.205672	0.031917	0.068351													0.063805	0.364837	0.426313	0.157432									0.07041	0.102064		0.185581
							0.275059	0.037118	0.071394	0.061885													0.101125	0.055957	0.038756	0.444014									0.117543	0.067337		0.180019
							0.147181	0.035293	0.215023	0.087747													0.077047	1.44144	0.331361	0.06976									0.143729	0.042774		0.058658
							0.091686	0.828163	0.4922	0.068351													0.137241	0.327905	0.290668	0.150833									0.037823	0.160507		0.068771
							0.032573	0.14178	0.071394	0.042488													0.103533	0.672598	0.158898	0.058448									0.339828	0.197351		0.10518
							1.04957	0.887795	0.031078	0.052648													0.125202	0.126462	0.100765	0.514717									0.065173	0.038115		0.040959
							0.167689	0.256785	0.057955	0.056343													0.368383	0.352526	0.040693	0.079187									0.137328	0.077077		0.036914
							0.307632	0.146647	0.266259	0.098831													0.077047	0.07722	0.075574	0.360113									0.053535	0.178717		0.036914
							0.031366	0.082755	0.047036	0.034175													0.101125	0.053718	0.100765	0.114067									0.129763	0.127474		0.068771
							0.063939	0.221492	0.032757	0.048954													0.077047	0.06379	0.116267	0.136692									0.225776	0.366752		0.06422
							0.334173	0.082147	0.088193	0.053572													0.073436	0.484584	0.0872	0.316749									0.117543	0.057173		0.070794
							0.062733	0.182549	0.150348	0.050801													0.107144	0.059314	0.300357	0.093328									0.083211	0.186764		0.072817
							0.061526	0.052331	0.094912	0.116381													0.03732	0.420793	0.044569	0.04525									0.064009	0.718257		0.121867
							0.524784	0.155166	0.039477	0.060038													0.10594	0.230541	0.242223	0.213994									0.043642	0.120274		0.046016
							0.038605	0.484971	0.062155	0.056343													0.119183	0.072744	0.036818	0.109354									0.050625	0.054632		0.072311
							0.04705	0.075453	0.270458	0.040641													0.393664	0.059314	0.044569	0.084843									0.05528	0.054632		0.049556
							0.220771	1.0387	0.088193	0.052648													0.071028	0.052599	0.098827	0.062219									0.049461	0.124086		0.055118
							0.213533	0.420471	0.075594	0.119152													0.173357	0.03805	0.255788	0.0905									0.059935	0.043197		0.080472
							0.363126	0.180723	0.227622	0.039717													0.05297	0.101841	0.149209	0.131036									0.114634	0.073266		0.045299
							0.108576	0.264087	0.037797	0.082205													0.095105	0.136534	0.093014	0.067875									0.107345	0.145261		0.222232
							0.041018	0.603628	0.104152	0.030481													0.173357	0.074982	0.160836	0.555253									0.069112	0.090206		0.059688
							0.179753	1.17805	0.050396	0.133006													0.198638	0.079458	0.067822	0.131036									0.096561	1.18665		0.162011
							0.045843	0.791044	0.236861	0.138548													0.409315	0.042527	0.467006	0.041479									0.140185	0.044468		0.09273
							0.16407	0.158209	0.039477	0.13393													0.099921	0.041408	0.110454	0.098041									0.051957	0.085971		0.232357
							0.324521	0.055373	0.082313	0.053572													0.044543	0.03917	0.060071	0.075416									0.048526	0.697506		0.07461
							0.055494	0.163077	0.157067	0.038794													0.097513	0.080577	0.244161	0.072588									0.398989	0.19354		0.06182
							0.032573	0.136303	0.175546	0.046183													0.244385	0.062587	0.209281	0.593904									0.1843	0.15119		0.107652
							0.13391	0.118657	0.12683	0.329745													0.209473	0.090294	0.205405	0.04525									0.041663	0.232925		0.150819
							0.065146	0.372399	0.086513	0.049877													0.367179	0.038465	0.036818	0.249817									0.55633	0.120274		0.165741
							0.100131	0.08884	0.073074	0.032328													0.060193	0.186782	0.172463	0.153661									0.047055	0.189305		0.075676
							0.174928	0.070585	0.035277	0.034175													0.350325	1.92943	0.242223	0.066932									0.120579	0.103334		0.10179
							0.082035	0.259219	0.047876	0.13393													0.066213	0.143754	0.060071	0.133864									0.12352	0.05082		0.042634
							0.078416	0.055373	0.167147	0.227219													0.081863	0.220683	0.042631	0.050906									0.070583	0.119851		0.162011
							0.048256	0.772181	0.075594	0.152403													0.077047	0.121588	0.042631	0.070703									0.12401	0.084277		0.049562
							0.046107	0.657175	0.162947	0.038794													0.071028	0.059653	0.385619	0.132921									0.098522	0.147378		0.036772
							0.035541	0.635269	0.082313	0.052648													0.146872	0.57306	0.054258	0.212109									0.785234	0.038962		0.080472
							0.047068	0.38031	0.069714	0.072969													0.493585	0.696277	0.054258	0.047135									0.273018	0.049126		0.077808
							0.105663	0.257394	0.034437	0.041565													0.043339	0.273491	0.073636	0.165916									0.104894	0.05082		0.512145
							0.553288	0.063284	0.037797	0.049877													0.211881	0.043028	0.062009	0.113125									0.201945	0.060984		0.221699
							0.178666	0.124742	0.237701	0.079434													0.216696	0.088339	0.153085	0.065989									0.053917	0.07623		0.115646
							0.03362	0.077887	0.088193	0.076663													0.711485	0.281314	0.058134	0.300723									0.041173	0.10037		0.151352
							0.200759	0.041378	0.032757	0.046183													0.765659	0.119958	0.060071	0.096156									0.190672	0.298992		0.06555
							0.072043	0.153341	0.062155	0.291875													0.058989	0.563606	0.172463	0.27527									0.037742	0.150343		0.407158
							0.062437	0.066326	0.117591	0.124694													0.12761	1.05876	0.05232	0.082015									0.170575	0.124509		0.287249
							0.047068	0.090666	0.065515	0.052648													0.040931	0.037813	0.267414	0.057505									0.157831	0.120274		0.065017
							0.225734	0.180723	0.039477	0.087747													0.424965	0.250347	0.063947	0.116895									0.048526	0.080042		0.309632
							0.116229	0.207497	0.033597	0.083129													0.067417	1.27325	0.067822	0.086729									0.394087	0.069454		0.086867
							0.18443	0.045029	0.066355	0.038794													0.446635	0.037161	0.127894	0.406306									0.343111	0.099523		0.864411
							0.226695	0.053548	0.068035	0.093289													0.114367	0.534921	0.220907	0.089557									0.060289	0.136791		0.076742
							0.035541	0.052331	0.045356	0.132083													0.23355	0.423438	0.079449	0.054677									0.056368	0.102064		0.057556
							0.091254	0.07667	0.057955	0.048954													0.322636	0.214816	0.065885	0.189484									0.06323	0.047009		0.05276
							0.138322	0.246976	0.182265	0.043412													0.470712	0.061609	0.083325	0.292239									0.451926	0.039809		0.051694
							0.053792	0.112478	0.053756	0.0859													0.267258	0.235026	0.046507	0.270556									0.06176	0.057596		0.100191
							0.059555	0.124976	0.053756	0.060961													0.079455	0.290767	0.056196	0.05939									0.293605	0.116039		0.104454
							0.037462	0.039278	0.068874	0.082205													0.03732	0.16755	0.071698	0.126323									0.347032	0.080042		0.242483
							0.106623	0.114264	0.211663	0.11361													0.390053	0.698885	0.302294	0.199854									0.356835	0.144414		0.036772
							0.11719	0.091649	0.034437	0.088671													0.050562	0.04857	0.354614	0.146119									0.044114	0.074113		0.075676
							0.082609	0.538586	0.106671	0.154251													0.040931	1.11515	0.098827	0.037708									0.503883	0.039386		0.055958
							0.059555	0.066059	0.031078	0.147785													0.52609	0.706708	0.073636	0.213994									0.057349	0.142296		0.669892
							0.051871	0.085103	0.043676	0.062809													0.038524	0.179611	0.248036	0.072588									0.593582	0.116886		0.547851
							0.145046	0.200556	0.036117	0.084976													0.139649	0.835793	0.100765	0.10087									0.116168	0.146531		0.104454
							0.039383	0.058917	0.042837	0.12377													0.701854	0.390189	0.232534	0.156489									0.064211	0.109687		0.037305
							0.209404	0.059512	0.053756	0.220754													0.185396	0.451798	0.048445	0.042422									0.080386	0.039386		0.071413
							0.035541	0.141044	0.066355	0.118228													0.870396	0.784942	0.036818	0.092385									0.077445	0.179564		0.090065
							0.059555	0.032732	0.047876	0.047106													0.310598	0.242524	0.044569	0.08013									0.323995	0.064796		0.071945
							0.040344	0.048205	0.047876	0.04803													0.058989	0.417571	0.044569	0.328061									0.317623	0.046162		0.215836
							0.271841	0.276732	0.041997	0.082205													0.355141	0.042376	0.106578	0.098041									0.232335	0.051667		0.068215
							0.095096	0.059512	0.032757	0.203204													0.234754	0.321735	0.083325	0.143291									0.076465	0.061831		0.060754
							0.181548	0.134498	0.111711	0.087747													0.305782	0.254259	0.135645	0.098984									0.120579	0.063525		0.134831
							0.044186	0.0732	0.064675	0.238303													0.05297	0.799284	0.114329	0.038651									0.508784	0.051244		0.116712
							0.039383	0.093434	0.137749	0.235532													0.11196	0.126803	0.054258	0.044307									0.168614	0.168977		0.048497
							0.041305	0.146995	0.196544	0.032328													0.078251	0.09062	0.063947	0.774904									0.076465	0.068184		0.073011
							0.155612	0.165444	0.063835	0.061885													0.18058	0.044912	0.125956	0.134807									0.059309	0.156272		0.039437
							0.55617	0.296371	0.040317	0.043412													0.046951	0.058731	0.044569	0.091442									0.048526	0.067337		0.134298
							0.053792	0.255308	0.131869	0.232761													0.260035	0.107098	0.040693	0.262072									0.101953	0.061408		0.05276
							0.054753	0.043444	0.030238	0.060038													0.754824	0.074854	0.108516	0.148005									0.090679	0.105028		0.045299
							0.055713	0.281493	0.154548	0.160716													0.347918	0.089824	0.0872	0.119724									0.102443	0.041503		0.418882
							0.250709	0.325532	0.12851	0.205975													0.03732	0.059883	0.116267	0.08013									0.042644	0.068184		0.202513
							0.076846	0.239239	0.030238	0.030481													0.054174	0.041457	0.05232	0.121609									0.083327	0.254524		0.162011
							0.266078	0.127951	0.083993	0.115457													0.155299	0.055276	0.065885	0.057505									0.054898	0.063102		0.293111
							0.472601	0.044039	0.24946	0.103449													0.081863	0.179648	0.056196	0.052791									0.116168	0.037268		0.064631
							0.37078	0.623688	0.035277	0.052648													0.086678	0.041457	0.038756	0.083901									0.46516	0.044806		0.039104
							0.35349	0.568937	0.085673	0.217983													0.067417	0.114008	0.187965	0.088614									0.053917	0.065173		0.053768
							0.141204	0.87602	0.075594	0.104373													0.079455	0.041457	0.046507	0.133864									0.040193	0.058772		0.043992
							0.116229	0.030946	0.150348	0.03787													0.063805	0.043761	0.042631	0.05939									0.21763	0.084375		0.14284
							0.10182	0.0732	0.043676	0.115457													0.043339	0.056428	0.065885	0.116895									0.099502	0.040151		0.039647
							0.18539	0.902801	0.218382	0.102526													0.03683	0.071399	0.118205	0.13952									0.148518	0.37416		0.27373
							0.475482	0.869474	0.035277	0.036023													0.03683	0.085218	0.081387	0.217765									0.30831	0.080884		0.096675
							0.104702	0.41361	0.031078	0.121923													0.054563	0.141646	0.098827	0.132921									0.287233	0.096013		0.061372
							0.463955	0.506449	0.260379	0.194891													0.068204	0.07255	0.154015	0.037708									0.043134	0.250798		0.039104
							0.207483	0.055346	0.081473	0.105297													0.136408	0.046064	0.044222	0.10087									0.037252	0.096595		0.063001
							0.053792	0.498713	0.052916	0.173647													0.045015	0.040306	0.102168	0.142349									0.133813	0.114634		0.062458
							0.465877	0.307678	0.059635	0.031404													0.152777	0.066792	0.044222	0.072588									0.12254	0.076229		0.093416
							0.620528	0.139854	0.041997	0.063732													0.105034	0.061034	0.170789	0.061276									0.059309	0.192608		0.298171
							0.159455	0.753425	0.031917	0.241998													0.275544	0.047215	0.054896	0.038651									0.242138	0.083793		0.402449
							0.311225	0.065463	0.041157	0.064656													0.081845	0.059883	0.163164	0.077302									0.043624	0.244979		0.044536
							0.062437	0.034517	0.112551	0.033252													0.14732	0.195771	0.039647	0.305437									0.070093	0.114052		0.064631
							0.034581	1.16704	0.073914	0.10622													0.256447	0.051822	0.117417	0.394994									0.172046	0.189117		0.304145
							0.058595	0.090459	0.106671	0.040641													0.049107	0.164678	0.135716	0.041479									0.079406	0.075647		0.112968
							0.088372	0.720693	0.055436	0.038794													0.049107	0.362752	0.070145	0.987955									0.047545	0.240324		0.044536
							0.188272	0.213054	0.172186	0.095137													0.060019	0.148555	0.079295	0.091442									0.453396	0.746575		0.071148
							0.228616	0.045229	0.113391	0.043412													0.040922	0.07946	0.082344	0.095213									0.043134	0.388126		0.045622
							0.072043	1.77584	0.045356	0.041565													0.069568	1.72739	0.195187	0.148005									0.075975	0.202501		0.04888
							0.301619	0.141044	0.067195	0.031404													0.114583	0.329356	0.038122	0.060333									0.041173	0.057608		0.131977
							0.040344	0.069034	0.031917	0.303883													0.135044	0.047215	0.054896	0.091442									0.296056	0.062263		0.061372
							0.576342	0.116644	0.046196	0.078511													0.085937	0.055276	0.150965	0.074474									0.329877	0.372415		0.139581
							0.058595	0.414205	0.094912	0.06558													0.088665	0.241835	0.300405	0.306379									0.051467	0.236251		0.13252
							0.104702	0.061893	0.092393	0.059114													0.055927	0.07255	0.042697	0.261129									0.078915	0.098923		0.065174
							0.246867	0.04999	0.030238	0.080358													0.189607	0.535491	0.239409	0.259244									0.038723	0.062845		0.040734
							0.647424	0.042254	0.031917	0.076663													0.159597	0.479063	0.048797	0.328061									0.142146	0.044224		0.148814
							0.039383	0.151756	0.039477	0.032328													0.327379	0.140494	0.07472	0.114067									0.074014	0.084375		0.056484
							0.070122	0.039278	0.056275	0.078511													0.241442	0.047215	0.240934	0.216822									0.050976	0.21472		0.042906
							0.041305	0.035707	0.133549	0.054496													0.201883	0.405361	0.285156	0.093328									0.084797	0.115798		0.066803
							0.1681	0.051181	0.047876	0.092366													0.190971	0.156617	0.094544	0.047135									0.074994	0.121035		0.457304
							0.076846	0.055942	0.083153	0.069274													0.084573	0.093279	0.111318	0.049021									0.06127	0.133255		0.327499
							0.073003	0.059945	0.042837	0.076663													0.364209	0.294808	0.140291	0.13575									0.272038	0.069246		0.195522
							0.072043	0.030768	0.031917	0.158869													0.225073	0.298263	0.060996	0.107468									0.088228	0.502178		0.038561
							0.102781	0.078512	0.032757	0.170876													0.042286	0.153162	0.411722	0.049021									0.055878	0.062263		0.090157
							0.063398	0.090183	0.069714	0.092366													0.079116	0.067944	0.205861	0.098041									0.103423	0.106487		0.043449
							0.077806	0.035543	0.096592	0.069274													0.235985	0.300566	0.125042	0.081073									0.252922	0.08903		0.218333
							0.057634	0.091774	0.038637	0.127465													0.040922	0.054125	0.259233	0.049021									0.056368	0.052371		0.049424
							0.071197	0.503961	0.178066	0.036023													0.165053	0.042609	0.240934	0.158375									0.230865	0.096595		0.130348
							0.182442	0.09814	0.052076	0.239227													0.107762	0.760051	0.051847	0.065047									0.043624	0.061681		0.039647
							0.079461	0.131561	0.031917	0.078511													0.069568	3.12312	0.167739	0.17063									0.044114	0.122199		0.047794
							0.052762	0.373462	0.030238	0.136701													0.047743	0.048367	0.045747	0.415733									0.056858	0.560368		0.728862
							0.101074	0.205298	0.12011	0.031404													0.054563	0.279837	0.121992	0.062219									0.254392	0.232759		0.052682
							0.075647	0.569211	0.076434	0.057267													0.197791	0.044912	0.182988	0.193255									0.148518	0.097759		0.156961
							0.061662	0.282218	0.110871	0.07574													0.141864	0.043761	0.051847	0.592019									0.407812	0.037241		0.820105
							0.04132	0.094957	0.03267	0.142243													0.249626	0.172739	0.111318	0.079187									0.249	0.079138		0.040734
							0.078825	0.648254	0.076229	0.070198													0.070932	0.084066	0.08082	0.111239									0.066171	0.070992		0.039647
							0.142394	0.602101	0.243934	0.109915													0.301461	0.097885	0.088444	0.131979									0.206357	0.203664		0.043449
							0.113788	0.118298	0.158993	0.069274													0.079116	0.179648	0.050322	0.103698									0.046565	0.047134		0.312835
							0.112517	0.70979	0.113981	0.136701													0.080481	0.05758	0.086919	0.074474									0.149008	0.441079		0.370948
							0.054033	0.259938	0.031218	0.167182													0.075024	0.201529	0.041172	0.054677									0.042644	0.179225		0.163478
							0.049584	0.077981	0.079133	0.064656													0.072296	0.064489	0.08082	0.147062									0.260764	0.187371		0.568642
							0.090268	0.354365	0.111077	0.250311													0.203248	0.088673	0.044222	0.155546									0.038232	0.069246		0.189547
							0.113788	0.559662	0.042108	0.073892													0.102306	0.709381	0.060996	0.116895									0.34164	0.077392		0.133607
							0.034963	0.48009	0.082763	0.044335													0.047743	0.046064	0.135716	0.218708									0.053427	0.048298		0.135236
							0.14748	0.058353	0.031218	0.626238													0.072296	1.60762	0.093019	0.105583									0.219101	0.10416		0.273187
							0.131587	0.094426	0.108173	0.807275													0.040922	0.076005	0.053371	0.140463									0.046565	0.048298		0.381811
							0.127138	0.518815	0.042834	0.179189													0.270087	0.352387	0.574886	0.039594									0.129892	0.256035		0.826079
							0.254911	0.234475	0.047916	0.148709													0.091393	0.207287	0.30193	0.132921									0.117148	0.360195		0.259066
							0.054669	0.033421	0.087119	0.030481													0.047743	0.104795	0.038122	0.098041									0.049996	0.037823		0.117856
							0.084546	0.53526	0.055901	0.033252													0.387398	0.347781	0.050322	0.078245									0.078425	0.051207		0.253092
							0.23584	0.986703	0.129953	0.223525													0.285092	0.043761	0.051847	0.167802									0.081366	0.17166		0.047251
							0.308944	0.110341	0.079133	0.177342													0.114583	0.066792	0.213486	0.101812									0.06274	0.04597		0.041277
							0.209141	0.343755	0.205456	0.183807													0.178694	0.530884	0.173838	0.148005									0.345071	0.083793		0.182487
							0.059119	0.18514	0.03267	0.108068													0.682039	0.055276	0.039647	0.091442									0.046565	0.077974		0.055941
							0.181807	1.01111	0.080585	0.203204													0.368301	0.039154	0.039647	0.048078									0.046565	0.082048		0.084726
							0.048948	0.276383	0.060983	0.094213													0.122767	0.290201	0.422397	0.252645									0.049506	0.076229		0.068433
							0.036234	0.035543	0.357189	0.063732													0.117311	1.18729	0.096069	0.823924									0.044604	0.054698		0.503468
							0.251732	0.080103	0.045012	0.108991													0.057291	0.442212	0.108268	0.173458									0.344581	0.037241		0.109166
							0.057212	0.56762	0.090749	0.172724													0.114583	0.051822	0.07167	0.129151									0.096561	0.11638		0.256351
							0.277796	0.047744	0.144473	0.061885													0.444689	0.041457	0.15554	0.060333									0.042644	0.050625		0.043449
							0.141123	0.050927	0.079133	0.226296													0.04365	0.058731	0.126567	0.180999									0.043624	0.068082		0.121115
							0.04132	0.107158	0.046464	0.060038													0.508801	0.046064	0.125042	0.24039									0.141656	0.082048		0.096675
							0.135402	0.064189	0.039204	0.034175													0.20734	0.077157	0.039647	0.081073									0.067642	0.060517		0.063001
							0.036234	0.264182	0.152459	0.072045													0.215524	0.048367	0.039647	0.068817									0.088228	0.068664		0.13252
							0.075647	0.085939	0.069695	0.211517													0.042286	0.042609	0.216535	0.094271									0.049718	0.037241		0.040734
							0.095989	0.074798	0.169882	0.071121													0.500616	0.110553	0.059471	0.092385									0.083425	0.053535		0.180315
							0.052762	0.03868	0.058079	0.034175													0.051835	0.039154	0.250083	0.062219									0.044662	0.158858		0.124374
							0.03242	0.079066	0.160445	0.07574													0.241442	0.059883	0.135716	0.0905									0.048875	0.16875		0.112425
							0.326743	0.030716	0.076955	0.032328													0.218252	0.080612	0.054896	0.037708									0.053088	0.048298		0.076579
							0.122688	0.073947	0.047916	0.044335													1.17993		0.375125	0.063161									0.133985	0.040689		0.363345
							0.080097	0.21729	0.047916	0.108991													0.717505		0.056421	0.162145									0.080897	0.154074		0.248204
							0.089632	0.040386	0.060257	0.186578													0.308281		0.093019	0.087672									0.048032	0.037434		0.043992
							0.094717	0.068827	0.064613	0.030481													0.042286		0.044222	0.325233									0.058987	0.037434		0.527366
							0.07819	0.035836	0.04356	0.068351													0.040922		0.051847	0.157432									0.247746	0.040146		0.097761
							0.219948	0.094424	0.0363	0.030481													0.113218		0.056421	0.362942									0.308419	0.040146		0.051596
							0.177357	0.046075	0.067517	0.053572													0.081845		0.07167	0.151776									0.109548	0.059677		0.128719
							0.03242	0.26564	0.042108	0.069274													0.631568		0.07167	0.270556									0.044662	0.054251		0.161305
							0.115695	0.085323	0.074777	0.057267													0.619291		0.064046	0.178171									0.073313	0.068357		0.04182
							0.033056	0.262796	0.076229	0.107144													0.042286		0.126567	0.054677									0.11039	0.054794		0.048337
							0.096625	0.385661	0.211264	0.117304													0.226437		0.103693	0.335603									0.566277	0.040689		0.137951
							0.118238	0.128554	0.114707	0.416569													0.151413		0.121992	0.081073									0.330328	0.169807		0.038018
							0.035599	0.821379	0.042834	0.588369													0.085937		0.160114	0.28564									0.083425	0.08409		0.162392
							0.112517	0.233217	0.040656	0.060961													0.038194		0.201287	0.056562									0.068257	0.128576		0.056484
							0.113788	0.134811	0.072599	0.104373													0.065476		0.207386	0.082958									0.051403	0.100365		0.04888
							0.1621	0.277585	0.073325	0.053572													0.984864		0.099118	0.479837									0.796327	0.147022		0.370405
							0.31848	0.149031	0.072599	0.044335													0.943941		0.134191	0.176286									0.109548	0.043944		0.143383
							0.202149	0.036405	0.064613	0.438736													0.075024		0.144865	0.103698									0.203084	0.064017		0.185746
							0.191978	0.098406	0.144473	0.047106													0.188243		0.096069	0.101812									0.04719	0.168722		0.235169
							0.071833	0.14505	0.116885	0.041565													0.125495		0.141816	0.164973									0.129772	0.052624		0.047794
							0.250461	0.102957	0.090749	0.032328													0.290548		0.097593	0.189484									0.156737	0.069442		0.037475
							0.490115	0.924336	0.066065	0.046183													0.132316		0.135716	0.177229									0.433134	0.133459		0.074407
							0.030513	0.320247	0.038478	0.056343													0.075024		0.082344	0.072588									0.133985	0.205613		0.155874
							0.044498	0.122866	0.079859	0.035099													0.130951		0.086919	0.122552									0.089323	0.241962		0.145012
							0.266989	0.732643	0.050094	0.120075													0.065476		0.067095	0.084843									0.169377	0.154074		0.071148
							0.071833	0.165527	0.064613	0.111762													0.107762		0.118942	0.111239									0.038763	0.063474		0.353025
							0.113788	0.104663	0.071873	0.030481													0.136408		0.038122	0.083901									0.305048	0.074325		0.047794
							0.034327	0.06769	0.144473	0.034175													0.03683		0.29583	0.239447									0.058987	0.228399		0.038018
							0.06039	0.053469	0.054449	0.131159													0.107762		0.207386	0.329947									0.235106	0.07975		0.068433
							0.165279	0.254832	0.095831	0.109915													0.084573		0.088444	0.040536									0.133985	0.424247		0.042093
							0.054669	0.234355	0.112529	0.035099													0.055927		0.181463	0.083901									0.075841	0.152989		0.046075
							0.146208	0.119453	0.03993	0.205052													0.106663		0.054896	0.043364									0.044662	0.18988		0.126279
							0.351535	0.030716	0.110351	0.138548													0.094403		0.050322	0.218708									0.161793	0.090057		0.069965
							0.190706	0.212171	0.092201	0.043412													0.061301		0.064046	0.182885									0.26797	0.077037		0.03868
							0.03687	0.218428	0.087845	0.060961													0.051492		0.065571	0.119724									0.418809	0.099823		0.037542
							0.042591	0.233217	0.034848	0.084053													0.056396		0.309554	0.36577									0.269656	0.18988		0.140499
							0.033056	0.13538	0.128501	0.131159													0.078465		0.469668	0.063161									0.109548	0.125863		0.036973
							0.221855	0.164958	0.135035	0.036946													0.142217		0.088444	0.092385									0.176962	0.113928		0.064277
							0.072468	0.170647	0.063887	0.064656													0.289339		0.22721	0.147062									0.056459	0.050996		0.047781
							0.111245	0.238905	0.19747	0.043412													0.058849		0.425446	0.143291									0.166007	0.343954		0.167234
							0.044498	0.455058	0.163349	0.052648													0.148347		0.311079	0.151776									0.096907	0.057507		0.049488
							0.040684	0.05802	0.082037	0.169953													0.045362		0.154015	0.049963									0.070785	0.106333		0.055745
							0.050219	0.342431	0.066065	0.073892													0.109115		0.042697	0.056562									0.481167	0.060762		0.046075
							0.443074	0.298632	0.047916	0.088671													0.299147		0.254658	0.116895									0.080054	0.055879		0.118315
							0.031149	0.121159	0.031944	0.057267													0.041684		0.115892	0.150833									0.041291	0.169807		0.672916
							0.076283	0.05802	0.089297	0.057267													0.045362		0.091494	0.070703									0.147468	0.540345		0.182592
							0.116331	0.035836	0.058079	0.191197													0.052718		0.045747	0.065047									0.194658	0.039061		0.062002
							0.055941	0.035267	0.092201	0.107144													0.123827		0.088444	0.148947									0.214882	0.042316		0.04835
							0.083911	0.04835	0.062435	0.211517													0.177772		0.064046	0.0905									0.284824	0.236536		0.040386
							0.075647	0.050625	0.145199	0.108991													0.158155		0.141816	0.065047									0.383417	0.154617		0.03868
							0.033691	0.07224	0.076955	0.031404													0.050266		0.048797	0.110297									0.048875	0.161669		0.209327
							0.059119	0.103192	0.083489	0.036946													0.052718		0.042697	0.197968									0.615152	0.054251		0.039249
							0.163372	0.354112	0.150281	0.146861													0.067431		0.08082	0.095213									0.096907	0.180657		0.041524
							0.109974	0.193892	0.037026	0.048954													0.275852		0.053371	0.076359									0.116289	0.240334		0.297494
							0.086454	0.032044	0.129953	0.108068													0.186354		0.137241	0.078245									0.069099	0.071612		0.33333
							0.354714	0.121115	0.25918	0.4295													0.508794		0.204336	0.357285									0.149153	0.067814		0.073947
							0.424004	0.136865	0.068243	0.039717													0.274626		0.178413	0.05939									0.128086	0.110131		0.186574
							0.331193	0.032587	0.071873	0.111762													0.053944		0.154015	0.137635									0.075841	0.068357		0.123434
							0.146208	0.140667	0.051546	0.039717													0.209648		0.050322	0.050906									0.118817	0.083005		0.435149
							0.125866	0.047251	0.140843	0.101602													0.155703		0.062521	0.062219									0.412068	0.17903		0.044937
							0.290509	0.339447	0.118337	0.049877													0.044136		0.245509	0.052791									0.080897	0.051539		0.108076
							0.099803	0.162392	0.037026	0.206899													0.089499		0.154015	0.044307									0.068257	0.045029		0.802608
							0.073104	0.484459	0.092927	0.052648													0.071109		0.161639	0.054677									0.331171	0.111216		0.05802
							0.040048	0.326413	0.076229	0.034175													0.112793		0.205861	0.056562									0.084267	0.139426		0.13538
							0.048312	0.751129	0.031218	0.079434													0.058849		0.054896	0.047135									0.151681	0.072154		0.106939
							0.098532	0.42363	0.068243	0.03787													0.100533		0.041172	0.092385									0.973288	0.049369		0.112058
							0.055305	0.168909	0.038478	0.047106													0.039232		0.047272	0.073531									0.053088	0.040146		0.10125
							0.090903	0.073864	0.099461	0.471064													0.229264		0.138766	0.044307									0.046347	0.046656		0.559152
							0.102981	0.410596	0.118337	0.1718													0.120149		0.103693	0.158375									0.565434	0.106875		0.145618
							0.389041	0.463821	0.046464	0.422111													0.310181		0.147915	0.066932									0.191287	0.067272		0.78725
							0.271439	0.137951	0.240304	0.133006													0.302825		0.100643	0.067875									0.779473	0.057507		0.155288
							0.069926	0.238971	0.048642	0.131159													0.046588		0.054896	0.130093									0.082582	0.071612		0.040955
							0.130952	1.13131	0.044286	0.038794													0.038006		0.054896	0.092687									0.533413	0.207241		0.182023
							0.047041	0.279162	0.149555	0.193044													0.073561		0.062521	0.070178									0.042134	0.051539		0.13026
							0.072468	0.454045	0.081311	0.034175													0.250106		0.121992	0.17743									0.394371	0.46819		0.20762
							0.119509	0.601229	0.108173	0.121923													1.06908		0.236359	0.088715									0.128086	0.059677		0.137655
							0.173543	0.419286	0.034122	0.04803													0.083369		0.166214	0.041047									0.076683	0.070527		0.140499
							0.17545	0.700076	0.0363	0.072045													0.117697		0.079295	0.22245									0.445774	0.18988		0.262227
							0.206599	0.271558	0.116159	0.098831													0.041684		0.050322	0.109901									0.738182	0.066187		0.10125
							0.256182	0.030414	0.129227	0.187502													0.064979		0.14639	0.050316									0.184546	0.049911		0.04835
							0.067383	0.100476	0.134309	0.118228													0.165511		0.265332	0.173458									0.200556	0.087345		0.08191
							0.045134	0.644135	0.067517	0.059114													0.192484		0.179938	0.060909									0.038763	0.062389		0.339018
							0.053398	0.109166	0.145925	0.114533													0.192484		0.054896	0.037075									0.074155	0.060219		0.09158
							0.068654	0.494236	0.040656	0.066503													0.886406		0.083869	0.062233									0.117132	0.10796		0.2463
							0.031149	0.180315	0.030492	0.094213													0.039232		0.088444	0.062233									0.049718	0.19422		0.244594
							0.041955	0.208013	0.052998	0.120075													0.041684		0.134191	0.079446									0.048875	0.108503		0.431736
							0.302587	0.072234	0.047916	0.060038													0.217004		0.050322	0.194644									0.116289	0.039061		0.108645
							0.14748	0.564841	0.093653	0.098831													0.083369		0.076245	0.039723									0.049478	0.049911		0.195106
							0.213591	0.606661	0.072599	0.138548													0.115245		0.088444	0.095336									0.131471	0.045029		0.069965
							0.105524	0.472511	0.050094	0.090518													0.038006		0.211961	0.136383									0.147728	0.053709		0.142206
							0.085182	0.087442	0.189484	0.073892													0.069883		0.094544	0.105929									0.436823	0.209411		0.230373
							0.146208	0.565384	0.170608	0.040641													0.060075		0.086919	0.288655									0.115921	0.08409		0.445957
							0.960524	0.0907	0.100187	0.250311													0.338379		0.288206	0.109901									0.8171	0.212666		0.499426
							0.06929	0.117313	0.034122	0.132083													0.713538		0.042697	0.105929									0.050892	0.052624		0.040955
							0.036234	0.1499	0.172786	0.125617													0.046588		0.128091	0.043696									0.043117	0.182827		0.071672
							0.04577	0.208557	0.296931	0.157945													0.250106		0.242459	0.10328									0.148435	0.062389		0.097837
							0.055941	0.091787	0.216346	0.121923													0.183902		0.062521	0.283359									0.048065	0.153532		0.047781
							0.126502	0.118942	0.042108	0.201357													0.079691		0.038122	0.087391									0.079872	0.040146		0.071672
							0.174814	0.103735	0.071147	0.043412													0.050266		0.047272	0.12579									0.067149	0.17252		0.044368
							0.26826	0.032587	0.129953	0.143167													0.478144		0.039647	0.178754									0.142074	0.052624		0.309439
							0.762189	0.096675	0.139391	0.052648													0.106663		0.112842	0.072826									0.165399	0.17035		0.050056
							0.462781	0.057027	0.055175	0.196739													0.507568		0.094544	0.237015									0.152676	0.0782		0.086461
							0.033691	0.094502	0.21562	0.086824													0.038006		0.163164	0.271442									0.041703	0.180422		0.649595
							0.057212	0.106451	0.189484	0.093289													0.147121		0.050322	0.381343									0.137126	0.186044		0.421497
							0.116967	0.083097	0.087845	0.10622													0.152025		0.140291	0.113873									0.10037	0.073089		0.556877
							0.575297	0.030958	0.053723	0.038794													0.071109		0.07472	0.066205									0.067149	0.0368		0.045506
							0.058483	0.111339	0.03993	0.141319													0.071109		0.125042	0.574662									1.06661	0.067467		0.051763
							0.130952	0.137951	0.085667	0.143167													0.328571		0.044222	0.091363									0.931607	0.116022		0.162683
							0.407476	0.040191	0.056627	0.04803													0.458528		0.093019	0.041047									0.261528	0.133911		0.412396
							0.081368	0.049424	0.084215	0.030481													0.617909		0.094544	0.109901									0.159038	0.177867		0.093287
							0.127138	0.081467	0.174238	0.114533													0.525959		0.120467	0.048992									0.077045	0.037311		0.092149
							0.392219		0.066065	0.061885													0.069883		0.045747	0.145652									0.077752	0.037822		0.127416
							0.049584		0.192388	0.033252													0.090725		0.105218	0.067529									0.219825	0.090978		0.34755
							0.030513		0.307821	0.034175													0.095629		0.198237	0.160217									0.812859	0.116533		0.193968
							0.176721		0.082763	0.091442													0.061301		0.064046	0.112549									0.081993	0.192689		0.280998
							0.275888		0.198922	0.165334													0.069883		0.140291	0.079446									0.070683	0.047022		0.320816
							0.108703		0.074051	0.0859													0.289339		0.050322	0.056937									0.559812	0.041911		0.100113
							0.718963		0.072599	0.089595													0.105437		0.073195	0.144328									0.037462	0.125222		0.116609
							0.325472		0.058079	0.169953													0.456076		0.161639	0.060909									0.066442	0.037822		0.057451
							0.059755		0.054449	0.072045													0.415618		0.108268	0.349564									0.194379	0.157422		0.06769
							0.067383		0.24103	0.111762													0.155703		0.091494	0.436955									0.149142	0.175311		0.468709
							0.033056		0.034848	0.077587													0.17532		0.14639	0.062233									0.255874	0.0368		0.04323
							0.090903		0.145199	0.060961													0.613005		0.254658	0.316461									0.233962	0.054178		0.043799
							0.269532		0.150281	0.081282													0.063753		0.240934	0.181403									0.432582	0.1656		0.266209
							0.193249		0.044286	0.156098													0.165511		0.120467	0.52567									0.047358	0.282644		0.358927
							0.052126		0.063161	0.133006													0.129957		0.384274	0.079446									0.315955	0.201378		0.040955
							0.078825		0.071873	0.157945													0.128731		0.132666	0.116521									0.139246	0.286733		0.09158
							0.102981		0.195292	0.056343													0.898666		0.349202	0.436955									0.05796	0.138511		0.072809
							0.076918		0.148103	0.160716													0.061301		0.047272	0.064881									0.499731	0.043956		0.064846
							0.12968		0.096557	0.133006													0.085821		0.076245	0.488595									0.434703	0.085356		0.084186
							0.104889		0.106721	0.044477													0.05517		0.108268	0.129762									0.041703	0.083311		0.249713
							0.123323		0.041382	0.094186													0.057623		0.343102	0.757389									0.047358	0.345511		0.040955
							0.062933		0.084941	0.101163													0.040458		0.079295	0.115197									0.810738	0.039867		0.118833
							0.031149		0.128501	0.09593													0.060075		0.157064	0.09666									0.144194	0.062867		0.041971
							0.191978		0.072599	0.042733													0.089499		0.050322	0.115197									0.188725	0.103244		0.040454
							0.6929		0.448664	0.077616													0.088273		0.132666	0.083419									0.064322	0.158444		0.198223
							0.046405		0.079133	0.087209													0.286887		0.096069	0.243636									0.63403	0.103756		0.08647
							0.107431		0.320163	0.189244													0.053944		0.455944	0.042371									0.392293	0.501911		0.128441
							0.06929		0.312903	0.100291													0.257462		0.121992	0.334999									0.062201	0.040378		0.040454
							0.319751		0.366627	0.064535													0.05517		0.060996	0.198616									0.344228	0.038333		0.059669
							0.204691		0.241756	0.04186													0.063753		0.160114	0.105929									0.135005	0.074622		0.054612
							0.089632		0.196744	0.190988													0.738058		0.160114	0.283359									0.107439	0.115511		0.137037
							0.054033		0.058079	0.047093													0.041684		0.106743	0.156245									0.077752	0.050089		0.155241
							0.120781		0.064613	0.103779													1.10096		0.22111	0.08077									0.112387	0.084844		0.088998
							0.261903		0.101639	0.057558													0.156929		0.044222	0.133735									0.821341	0.105289		0.153724
							0.106796		0.082037	0.034884													0.057623		0.144865	0.197292									0.057254	0.049578		0.352959
							0.072468		0.042108	0.081105													0.115245		0.103693	0.242311									0.431875	0.097622		0.07939
							0.171		0.150281	0.149128													0.110341		0.147915	0.037075									0.038169	0.217222		0.038937
							0.052126		0.124871	0.061046													0.997973		0.112842	0.242311									0.048065	0.0414		0.089504
							0.06484		0.033396	0.052326													0.26727		0.263807	0.064881									0.91747	0.044978		0.220473
							0.062933		0.070421	0.070639													0.03678		0.564212	0.262173									0.213464	0.065933		0.04551
							0.03687		0.080585	0.03314													0.062527		0.161639	0.046344									0.043117	0.661378		0.041465
							0.074375		0.093653	0.049709													0.207196		0.088444	0.210533									0.04029	0.316889		0.102146
							0.118238		0.171334	0.066279													0.080917		0.088444	0.039723									0.043117	0.097622		0.044499
							0.167822		0.053723	0.066279													0.125053		0.294305	0.150948									0.056547	0.038844		0.154735
							0.034963		0.052998	0.048837													0.47324		0.123517	0.111225									0.046651	0.048556		0.166366
							0.037506		0.080585	0.040988													0.039232		0.131141	0.156245									0.079165	0.042422		0.389873
							0.07819		0.055175	0.195349													0.312633		0.117417	0.345592									0.120162	0.072067		0.291267
							0.13858		0.048642	0.101163													0.214552		0.102168	0.100632									0.056547	0.048556		0.220473
							0.146208		0.034848	0.251163													0.156929		0.282106	0.164189									0.104611	0.134933		0.198223
							0.098532		0.075503	0.081105													0.058849		0.083869	0.100632									0.065736	0.075644		0.05259
							0.061026		0.034122	0.121221													0.637526		0.231784	0.197292									0.110266	0.131867		0.036914
							0.031784		0.04356	0.071512													0.060075		0.120467	0.048992									0.055133	0.043444		0.062703
							0.04132		0.031944	0.064535													0.677984		0.358351	0.32573									0.304645	0.202911		0.125912
							0.031784		0.085667	0.038372													0.41194		0.108268	0.479326									0.088354	0.050089		0.072817
							0.076283		0.047916	0.194477													0.148347		0.237884	0.058261									0.053719	0.051111		0.084447
							0.092175		0.135035	0.040988													0.551705		0.207386	0.050316									0.103198	0.357267		0.078379
							0.094082		0.143747	0.078488													0.188806		0.041172	0.336323									0.050892	0.049067		0.15423
							0.183078		0.098009	0.063663													0.356769		0.173838	0.113873									0.236082	0.073089		0.046522
							0.061662		0.140843	0.102907													0.407036		0.147915	0.047668									0.103905	0.165089		0.085458
							0.038141		0.169882	0.088953													0.116471		0.108268	0.131087									0.085527	0.157933		0.146645
							0.068019		0.113981	0.109012													0.134861		0.120467	0.082095									0.099664	0.134422		0.106191
							0.189435		0.273699	0.043605													0.376385		0.208911	0.079446									0.112387	0.097622		0.643214
							0.216839		0.052272	0.108139													0.147121		0.048797	0.205237									0.231135	0.0552		0.058658
							0.230441		0.113255	0.036628													0.18758		0.236359	0.256877									0.481354	0.076156		0.047027
							0.157628		0.0363	0.067151													0.045362		0.050322	0.042371									0.148435	0.278044		0.13906
							0.076014		0.099461	0.089825													0.051492		0.039647	0.108577										1.01353		0.175974
							0.052009		0.0363	0.059302													0.038006		0.086919	0.233043										0.298489		0.268006
							0.030405		0.037752	0.178779													0.177772		0.128091	0.115197										0.157933		0.161815
							0.049609		0.102365	0.065407													0.700052		0.102168	0.092687										0.092511		0.13552
							0.030405		0.272973	0.057558													0.047814		0.178413	0.30322										0.057244		0.243228
							0.081615		0.116885	0.234593													0.150799		0.279056	0.086067										0.053156		0.143105
							0.090416		0.140843	0.062791													0.079691		0.07472	0.186699										0.482489		0.306437
							0.122422		0.059531	0.035756													0.041684		0.150965	0.046344										0.088933		0.131475
							0.095217		0.063887	0.143023													0.457302		0.060996	0.254228										0.192689		0.062198
							0.077614		0.052272	0.043605													0.038006		0.396473	0.079446										0.077178		0.057141
							0.05441		0.037752	0.046221													0.44872		0.057946	0.213181										0.059289		0.114282
							0.181633		0.049368	0.210174													0.052718		0.15554	0.04502										0.068489		0.039948
							0.198436		0.034848	0.172674													0.269722		0.131141	0.077528										0.309222		0.258904
							0.062411		0.05082	0.260756													0.18145		0.129616	0.094905										0.434444		0.580005
							0.44888		0.085667	0.124709													0.045362		0.100643	0.094905										0.227444		0.106697
							0.040807		0.108173	0.153488													0.220682		0.047272	0.074855										0.438022		0.133497
							0.156828		0.031218	1.07442													0.053944		0.111318	0.045447										0.130333		0.770137
							0.439279		0.05082	0.070639													0.589711		0.096069	0.037427										0.116022		0.069277
							0.089616		0.05082	0.255523													0.073561		0.039647	0.038764										0.3174		0.234126
							0.070413		0.109625	0.082849													0.083369		0.126567	0.106935										0.048556		0.044499
							0.368866		0.084941	0.088953													0.105437		0.614534	0.082875										0.104778		0.263455
							0.036807		0.108899	0.253779													0.183902		0.038122	0.086885										0.095578		0.167883
							0.150427		0.340491	0.085465													0.801811		0.079295	0.037427										0.077178		0.118327
							0.163229		0.161171	0.038372													0.174094		0.272957	0.057478										0.0644		0.394929
							0.065612		0.038478	0.105523													0.040458		0.126567	0.072181										0.316378		0.076356
							0.871356		0.060983	0.047093													0.332249		0.115892	0.21387										0.0414		0.076356
							0.314456		0.05082	0.035756													0.323667		0.070145	0.081538										0.042933		0.077873
							0.117621		0.109625	0.249418													0.084595		0.132666	0.068171										0.100178		0.074334
							0.071213		0.100187	0.090698													0.140991		0.048797	0.078865										0.075133		0.11327
							0.176032		0.034848	0.065407													0.074787		0.120467	0.088222										0.038844		0.046016
							0.038407		0.093653	0.09157													0.270948		0.044222	0.077528										0.157933		0.121867
							0.172031		0.161171	0.108139													0.18145		0.182988	0.037427										0.075644		0.081919
							0.080014		0.116159	0.036628													0.052718		0.07472	0.072181										0.1242		0.08647
							0.05361		0.060257	0.106395													0.372707		0.070145	0.156393										0.052133		0.408077
							0.108019		0.128501	0.340988													0.076013		0.247033	0.061488										0.044467		0.04551
							0.05521		0.149555	0.059302													0.087047		0.091494	0.203177										0.043444		0.048544
							0.088816		0.160445	0.083721													0.122601		0.083869	0.070845										0.070022		0.040454
							0.249645		0.030492	0.113372													0.223134		0.202811	0.175106										0.056507		0.041971
							0.231241		0.110351	0.278197													0.088273		0.135716	0.137679										0.086384		0.224518
							0.184833		0.112529	0.160465													0.045362		0.042697	0.053468										0.040919		0.120855
							0.992177		0.033396	0.160465													0.039232		0.054896	0.052131										0.046115		0.129452
							0.032006		0.051546	0.060174													0.139765		0.067095	0.171096										0.051961		0.061692
							0.316857		0.084941	0.093314													0.085821		0.645032	0.041437										0.03962		0.113776
							0.043208		0.381872	0.044477													0.264818		0.079295	0.527993										0.069497		0.072817
							0.080014		0.20836	0.063663													0.053944		0.14334	0.088222										0.657301		0.207325
							0.401672		0.042108	0.306976													0.045362		0.105218	0.130996										0.046115		0.354981
							0.079214		0.173512	0.197093													0.056396		0.314129	0.061488										0.120159		0.133497
							0.086415		0.047916	0.160465													0.057623		0.137241	0.20585										0.882679		0.093043
							0.036006		0.042834	0.083721													0.073561		0.193662	0.088222										0.140293		0.623493
							0.16963		0.066065	0.184884													0.046588		0.173838	0.082875										0.055858		0.047533
							0.768137		0.042108	0.054942													0.109115		0.106743	0.102925										0.288381		0.102146
							0.041607		0.031944	0.355814													0.041684		0.093019	0.179117										0.050662		0.642708
							0.443279		0.119789	0.107267													0.04904		0.343102	0.312786										0.046115		0.06776
							0.05681		0.110351	0.066279													0.068657		0.045747	0.040101										0.085085		0.222495
							0.136024		0.055901	0.132558													0.053944		0.08082	0.104262										0.499471		0.071805
							0.069612		0.156815	0.101163													0.058849		0.114367	0.288725										0.417633		0.478871
							0.285651		0.048642	0.043605													0.155703		0.14639	0.156393										0.062353		0.247273
							0.083215		0.050094	0.092442													0.074787		0.099118	0.117629										0.316959		0.06776
							0.170431		0.153185	0.053198													0.080917		0.079295	0.052131										0.037671		0.087481
							0.410473		0.056627	0.047965													0.093177		0.045747	0.118965										0.085735		0.478871
							0.035206		0.111803	0.050581													0.110341		0.254658	0.101589										0.168222		0.047533
							0.073613		0.045012	0.061046													0.106663		0.283631	0.076191										0.135097		0.093043
							0.030405		0.143021	0.122965													0.051492		0.067095	0.130996										0.120808		0.04551
							0.05361		0.131405	0.12907													0.072335		0.250083	0.065498										0.07924		0.136531
							0.129623		0.03267	0.107267													0.229264		0.240934	0.108272										0.187707		0.075851
							0.16643		0.031218	0.072384													0.201066		0.056421	0.086885										0.048713		0.038431
							0.044808		0.127049	0.22936													0.04904		0.29278	0.35155										0.120159		0.040959
							0.11122		0.066065	0.057558													0.040458		0.105218	0.199167										0.181862		0.194683
							0.121622		0.062435	0.134302													0.084595		0.114367	0.294072										0.150686		0.073915
							0.218439		0.094379	0.031395													0.039232		0.060996	0.247288										0.050012		0.049132
							0.207237		0.076955	0.123837													0.134861		0.085394	0.18179										0.081188		0.069567
							0.128823		0.050094	0.197093													0.044136		0.073195	0.105599										0.111066		0.313051
							0.076014		0.079859	0.110756													0.062527		0.07472	0.113619										0.07924		0.108698
							0.131223		0.045738	0.048837													0.050665		0.048797	0.057478										0.046115		0.446533
							0.075213		0.144473	0.074128													0.061707		0.140291	0.236594										0.050012		0.037392
							0.034424		0.076229	0.128198													0.227993		0.083869	0.270011										0.055858		0.045219
							0.109767		0.098009	0.103779													0.041571		0.102168	0.332836										0.622227		0.119133
							0.031176		0.099461	0.034012													0.037674		0.083869	0.133669										0.792398		0.058697
							0.043517		0.041382	0.1125													0.059109		0.105218	0.139016										0.254607		0.193918
							0.050662		0.315081	0.098546													0.053263		0.050322	0.295409										0.749531		0.040871
							0.035073		0.366627	0.068895													0.095484		0.051847	0.106935										0.061054		0.15783
							0.03962		0.034848	0.106395													0.060408		0.184513	0.159066										0.850854		0.164787
							0.097426		0.035574	0.28343													0.166285		0.138766	0.133669										0.119509		0.102177
							0.301371		0.101639	0.068895													0.08704		0.06862	0.048121										0.721602		0.107829
							0.038321		0.034848	0.066279													0.215002		0.193662	0.100252										0.405292		0.052175
							0.037022		0.24829	0.047093													0.15979		0.060996	0.147036										0.107169		0.077828
							0.375415		0.041382	0.177035													0.409218		0.103693	0.326152										0.162377		0.230006
							0.133149		0.094379	0.052326													0.282555		0.099118	0.135006										0.100674		0.036957
							0.064301		0.094379	0.034884													0.091587		0.047272	0.298082										0.244214		0.135656
							0.464397		0.037752	0.114244													0.306589		0.109793	0.410364										0.373466		0.098263
							0.253308		0.153185	0.039244													0.075998		0.079295	0.139016										0.226678		0.793064
							0.180563		0.064613	0.105523													0.207857		0.173838	0.121639										0.418932		0.186092
							0.087683		0.068243	0.081105													0.055862		0.163164	0.081538										0.326052		0.091741
							0.038321		0.070421	0.035756													0.071451		0.039647	0.274022										0.068198		0.234789
							0.179264		0.103817	0.051453													0.326075		0.196712	0.141689										0.361775		0.28479
							0.060404		0.037752	0.077616													0.260471		0.065571	0.105599										0.140293		0.107829
							0.034424		0.04719	0.205814													0.053913		0.079295	0.072181										0.402045		0.042175
							0.133798		0.115433	0.071512													0.312435		0.135716	0.082875										0.422179		0.266963
							0.10522		0.103091	0.078488													0.063007		0.109793	0.136342										0.319557		0.150004
							0.06625		0.124871	0.207558													0.094185		0.041172	0.050794										0.160428		0.045653
							0.161727		0.061491	0.068895													0.044819		0.045747	0.132332										0.492326		0.153047
							0.613134		0.128375	0.034012													0.172131		0.320229	0.125649										0.048063		0.040001
							0.106519		0.063648	0.034884													0.244881		0.07167	0.060151										0.110416		0.119568
							0.035073		0.084145	0.174418													0.127312		0.091494	0.334173										0.139644		0.095655
							0.336444		0.100327	0.05843													0.047417		0.06862	0.054804										0.340991		0.26305
							0.306567		0.187708	0.049709													0.738541		0.198237	0.064161										0.183161		0.145656
							0.09223		0.331187	0.532848													0.080545		0.062521	0.364916										0.429973		0.045219
							0.055208		0.238411	0.068023													0.158491		0.042697	0.041437										0.47414		0.079567
							0.046764		0.261066	0.330523													0.417013		0.07472	0.057478										0.038321		0.067393
							0.292927		0.340896	0.031395													0.113672		0.041172	0.330163										0.061703		0.040871
							0.061703		0.111115	0.051453													0.157841		0.114367	0.072181										0.100024		0.420011
							0.15783		0.037757	0.047965													0.557966		0.051847	0.074855										0.133149		0.044349
							0.194202		0.034521	0.128198													0.108475		0.093019	0.117629										0.047414		0.067393
							0.337094		0.170448	0.047965													0.199413		0.056421	0.044111										0.070147		0.350009
							0.383209		0.235175	0.070639													0.114321		0.125042	0.287388										0.163026		0.221745
							0.087683		0.111115	0.090698													0.044819		0.187562	0.196494										0.046764		0.082176
							0.081838		0.126218	0.175291													0.63851		0.082344	0.122976										0.064951		0.062175
							0.50012		0.137006	0.048837													0.33322		0.051847	0.153719										0.089632		0.043045
							0.531296		0.312847	0.095058													0.317631		0.125042	0.117629										0.10587		0.039566
							0.033125		0.097091	0.136046													0.056511		0.056421	0.120302										0.437118		0.088698
							0.03962		0.126218	0.049709													0.519642		0.157064	0.085548										0.357878		0.083915
							0.428674		0.16829	0.043605													0.045469		0.114367	0.527993										0.240317		0.053045
							0.383209		0.11543	0.04186													0.124065		0.201287	0.037427										0.23707		1.23134
							0.261751		0.039915	0.071512													0.061707		0.131141	0.068171										0.116262		0.061741
							0.224729		0.073357	0.207558													0.051964		0.254658	0.117629										0.153284		0.190005
							0.411787		0.064727	0.093314													0.062357		0.067095	0.064161										0.042867		0.056523
							0.857998		0.114351	0.200581													0.059109		0.157064	0.053468										0.044816		0.484795
							0.48648		0.147793	0.168314													0.039623		0.29278	0.368927										0.040269		0.120873
							0.459851		0.032364	0.055814													0.061707		0.135716	0.16174										0.230575		0.210875
							0.243565		0.04423	0.042733													0.040272		0.178413	0.139016										0.347486		0.055219
							0.510512		0.063648	0.038372													0.056256		0.169264	0.245951										0.182511		0.045219
							0.169521		0.073357	0.117732													0.268604		0.178413	0.057478										0.179913		0.043479
							0.591051		0.045309	0.161337													0.03724		0.059471	0.364916										0.079889		0.092176
							0.101323		0.07983	0.072384													0.06101		0.15249	0.438434										0.080554		0.325226
							0.088982		0.177999	0.09593													0.245626		0.057946	0.041437										0.046231		0.119568
							0.264349		0.072279	0.049709													0.062595		0.102168	0.220554										0.037125		0.079132
							0.064301		0.032364	0.080232													0.072896		0.051847	0.045447										0.052535		0.048262
							0.070796		0.090618	0.157849													0.21314		0.038122	0.100252										0.230455		0.242615
							0.044166		0.034521	0.050581													0.041202		0.106743	0.038764										0.079153		0.067828
							0.427375		0.039915	0.062791													0.091119		0.29888	0.130996										0.299802		1.12959
							0.454655		0.117587	0.093314													0.323276		0.134191	0.101589										0.078453		0.060871
							0.084436		0.047466	0.096802													0.100628		0.300405	0.054804										0.042729		0.10609
							0.060404		0.060412	0.051929													0.146583		0.215011	0.106935										0.07495		0.496969
							0.033125		0.128375	0.071626													0.041202		0.038122	0.280705										0.164611		0.792194
							0.032475		0.110036	0.043871													0.259888		0.167739	0.049458										0.145698		0.077828
							0.03897		0.030206	0.182646													0.08795		0.355301	0.303429										0.037825		0.143482
							0.032475		0.056097	0.101171													0.091119		0.067095	0.37561										0.217847		0.767846
							0.268246		0.233017	0.061777													0.053879		0.054896	0.118965										0.335526		0.483491
							0.035073		0.179078	0.032232													0.051502		0.070145	0.052131										0.060241		0.069567
							0.489728		0.102485	0.054615													0.205217		0.053371	0.053468										0.073549		0.099568
							0.042218		0.096012	0.043871													0.045956		0.173838	0.060151										0.075651		0.046958
							0.253308		0.096012	0.062672													0.065764		0.160114	0.041437										0.046932		0.04261
							0.038321		0.043151	0.07073													0.103797		0.190612	0.18981										0.056038		0.102177
							0.181862		0.141321	0.05551													0.071311		0.125042	0.049458										0.072149		0.061334
							0.059755		0.036679	0.19518													0.10142		0.129616	0.069508										0.560377		0.102401
							0.186408		0.033442	0.162948													0.468275		0.073195	0.358233										0.157606		0.062934
							0.044166		0.112194	0.043871													0.038825		0.114367	0.037427										0.130288		0.082134
							0.036372		0.04423	0.062672													0.093496		0.057946	0.163076										0.142196		0.068267
							0.066899		0.145636	0.043871													0.043579		0.106743	0.176443										0.275285		0.054934
							0.168872		0.126218	0.085055													0.055464		0.137241	0.136342										0.060941		0.044267
							0.068848		0.119745	0.148623													0.038825		0.047272	0.070845										0.173016		0.042667
							0.179913		0.040994	0.351861													0.039617		0.15554	0.156393										0.130988		0.072534
							0.045465		0.100327	0.054615													0.058633		0.047272	0.072181										0.047632		0.109334
							0.092879		0.034521	0.121764													0.052295		0.186038	0.105599										0.079153		0.169601
							0.116911		0.069042	0.049243													0.183824		0.065571	0.104262										0.570183		0.049067
							0.174068		0.084145	0.137879													0.041202		0.253133	0.097578										0.095264		0.057067
							0.073394		0.1068	0.081474													0.044371		0.047272	0.159066										0.095965		0.066667
							0.330599		0.051782	0.129822													0.454012		0.039647	0.327489										0.038526		0.086401
							0.075343		0.0356	0.110125													0.03724		0.211961	0.135006										0.049733		0.064001
							0.178614		0.043151	0.073416													0.038825		0.094544	0.109609										0.122582		0.052267
							0.059755		0.056097	0.218458													0.109343		0.048797	0.188473										0.062342		0.070934
							0.063652		0.056097	0.053719													0.064972		0.108268	0.57344										0.084757		0.051734
							0.046764		0.047466	0.047452													0.160846		0.056421	0.239268										0.179321		0.068801
							0.176666		0.072279	0.068044													0.124398		0.391899	0.221891										0.079854		0.140268
							0.217585		0.055018	0.11102													0.093496		0.088444	0.110945										0.037125		0.061867
							0.303969		0.04423	0.134298													0.115682		0.038122	0.045447										0.23816		0.085334
							0.238477		0.134848	0.089532													0.145791		0.324803	0.235258										0.794334		0.058667
							0.032022		0.121903	0.296351													0.181447		0.047272	0.041437										0.08896		0.604805
							0.300835		0.13269	0.046557													0.046748		0.042697	0.128322										0.086158		0.104001
							0.048875		0.081988	0.131612													0.057049		0.067095	0.058814										0.247266		0.0368
							0.042134		0.069042	0.186227													0.203632		0.195187	0.319469										0.107873		0.090134
							0.055616		0.04423	0.144147													0.041994		0.06862	0.275358										0.265479		0.0576
							0.036235		0.0356	0.214877													0.298713		0.243984	0.18179										0.05884		0.086934
							0.091009		0.105721	0.078788													0.049125		0.320229	0.413037										0.457408		0.163735
							0.032864		0.043151	0.283817													0.059426		0.141816	0.187137										0.510643		0.048
							0.065729		0.057176	0.490636													0.133114		0.144865	0.044111										0.093163		0.096001
							0.03455		0.080909	0.150414													0.066557		0.094544	0.085548										0.037125		0.049067
							0.256173		0.107878	0.059987													0.248003		0.222635	0.089558										0.07425		0.048534
							0.058144		0.033442	0.235469													0.35497		0.088444	0.348876										0.145698		0.198935
							0.044662		0.034521	0.197866													0.193332		0.120467	0.251298										0.111375		0.110934
							0.099436		0.030206	0.049243													0.134698		0.121992	0.184463										0.039226		0.280536
							0.065729		0.040994	0.165634													0.043579		0.067095	0.112282										0.216446		0.054934
							0.133985		0.070121	0.088637													0.307429		0.091494	0.050794										0.096665		0.04
							0.032022		0.037757	0.048347													0.05071		0.109793	0.084211										0.072149		0.142401
							0.042976		0.046388	0.100276													0.045164		0.266857	0.097578										0.08966		0.087467
							0.185388		0.118666	0.158472													0.076857		0.097593	0.195157										0.046231		0.0624
							0.155895		0.059333	0.072521													0.05071		0.144865	0.044111										0.07495		0.108801
							0.107862		0.284799	0.039394													0.358139		0.158589	0.232584										0.204538		0.284269
							0.080054		0.039915	0.042975													0.373193		0.06862	0.094905										0.187726		0.038934
							0.085953		0.213599	0.182646													0.167184		0.094544	0.101589										0.084757		0.157868
							0.057302		0.051782	0.104753													0.103005		0.135716	0.261991										0.040627		0.084267
							0.032022		0.039915	0.076998													0.142622		0.178413	0.089558										0.100167		0.058667
							0.108705		0.07983	0.094904													0.322484		0.243984	0.18179										0.552672		0.109868
							0.035392		0.252435	0.040289													1.12275		0.108268	0.038764										0.063743		0.173335
							0.286509		0.111115	0.065358													0.112513		0.186038	0.048121										0.052535		0.085867
							0.031179		0.089539	0.06894													0.186201		0.144865	0.081538										0.050434		0.045867
							0.063201		0.146715	0.061777													0.042787		0.22111	0.048121										0.182123		0.074134
							0.042134		0.047466	0.032232													0.045164		0.193662	0.564083										0.183523		0.086401
							0.032022		0.111115	0.129822													0.190162		0.120467	0.062824										0.068646		0.279469
							0.056459		0.104642	0.119078													0.082404		0.039647	0.217881										0.042028		0.126934
							0.297464		0.04423	0.397523													0.06101		0.07472	0.199167										0.257073		0.0624
							0.030336		0.0356	0.061777													0.060218		0.103693	0.056141										0.043429		0.206402
							0.101121		0.119745	0.17996													0.042787		0.192137	0.266001										0.063743		0.563738
							0.100278		0.249199	0.040289													0.03724		0.060996	0.126986										0.205939		0.089601
							0.417124		0.055018	0.044766													0.12836		0.103693	0.232584										0.171615		0.277869
							0.106177		0.040994	0.059987													0.05071		0.097593	0.58146										0.123283		0.053334
							0.043819		0.189866	0.04208													0.040409		0.243984	0.037427										0.037825		0.732272
							0.038763		0.199575	0.122659													0.184616		0.15249	0.053468										0.152703		0.073601
							0.154209		0.208205	0.375139													0.083988		0.045747	0.116292										0.049033		0.272002
							0.041291		0.174763	0.158472													0.041202		0.088444	0.061488										0.067946		0.215468
							0.039606		0.137006	0.123554													0.081611		0.390374	0.108272										0.063042		0.509871
							0.202242		0.077672	0.058196													0.05071		0.050322	0.082875										0.04483		0.044267
							0.12303		0.030206	0.240841													0.150545		0.08082	0.117629										0.122582		0.134934
							0.207298		0.111115	0.043871													0.188023		0.132666	0.187137										0.078453		0.045867
							0.458415		0.032364	0.165634													0.038399		0.082344	0.203177										0.244464		0.078401
							0.080054		0.146715	0.132508													0.068854		0.038122	0.090895										0.135274		0.249602
							0.30252		0.078751	0.205924													0.041047		0.240934	0.062824										0.042439		0.637338
							0.116289		0.073357	0.311572													0.067529		0.047272	0.248624										0.08753		0.136534
							0.262072		0.460641	0.038499													0.520374		0.094544	0.097578										0.038195		0.0528
							0.03455		0.031285	0.177274													0.117846		0.065571	0.536013										0.073738		0.161601
							0.180332		0.04423	0.050138													0.075474		0.053371	0.086885										0.248267		0.148801
							0.07247		0.122981	0.165634													0.038399		0.431546	0.152383										0.055171		0.056
							0.091009		0.08846	0.128926													0.161541		0.106743	0.259318										0.134213		0.118934
							0.030336		0.200654	0.335745													0.09666		0.243984	0.156393										0.376645		0.137068
							0.090166		0.040994	0.446765													0.04502		0.08082	0.089558										0.242432		0.155735
							0.056459		0.030206	0.098485													0.115197		0.170789	0.098915										0.214316		0.498671
							0.030336		0.067963	0.046557													0.058261		0.088444	0.19783										0.038195		0.081067
							0.030336		0.069042	0.039394													0.046344		0.106743	0.116292										0.100792		0.080001
							0.038763		0.100327	0.209505													0.308517		0.067095	0.084211										0.158085		0.078934
							0.079211		0.048545	0.18175													0.256877		0.059471	0.172433										0.159146		0.072534
							0.448303		0.161818	0.089532													0.131087		0.047272	0.125649										0.269487		0.475204
							0.309261		0.075515	0.037603													0.05164		0.093019	0.116292										0.136865		0.132268
							0.166849		0.131612	0.214877													0.773278		0.294305	0.168423										0.090183		0.069867
							0.120502		0.11543	0.036708													0.041047		0.10024	0.040101										0.151188		0.389336
							0.03455		0.091697	0.356338													0.115197		0.09295	0.065498										0.041908		0.065601
							0.053088		0.045309	0.31963													0.066205		0.083837	0.133669										0.303438		0.122668
							0.033707		0.080909	0.216668													0.10328		0.063789	0.064161										0.308743		0.140268
							0.353923		0.122981	0.639259													0.09666		0.049209	0.122976										0.197341		0.094401
							0.030336		0.094933	0.149519													0.082095		0.105707	0.041437										0.11989		0.081067
							0.174434		0.033442	0.184436													0.047668		0.061966	0.064161										0.096548		0.089067
							0.24269		0.048545	0.079684													0.574662		0.089304	0.18981										0.632339		0.152535
							0.045504		0.034521	0.07073													0.072826		0.083837	0.114955										0.522528		0.085867
							0.105334		0.138084	0.100276													0.066205		0.080192	0.096242										0.067902		0.0576
							0.043819		0.26646	0.091323													0.145652		0.072902	0.085548										0.045622		0.058134
							0.152524		0.120824	0.234574													0.1483		0.043741	0.450465										0.463114		0.316269
							0.042134		0.033442	0.16653													0.08077		0.083837	0.086885										0.41537		0.082134
							0.035392		0.198496	0.196971													0.211857		0.200479	0.090895										0.228639		0.086401
							0.15758		0.093854	0.347385													0.321758		0.069256	0.195157										0.45834		0.289602
							0.074155		0.05286	0.544355													0.805057		0.041918	0.327489										0.519346		0.141868
							0.128086		0.0712	0.158472													0.05164		0.167674	0.312786										0.15278		0.056
							0.198028		0.099248	0.071626													0.479326		0.063789	0.097578										0.178243		0.216535
							0.358136		0.040994	0.044766													0.041047		0.080192	0.082875										0.129439		0.076267
							0.25196		0.147793	0.033127													0.041047		0.080192	0.062824										0.485925		0.052267
							0.077526		0.161818	0.416324													0.642192		0.071079	0.050794										0.322535		0.152535
							0.143255		0.126218	0.392151													0.504485		0.096595	0.048121										0.16339		0.092801
							0.090166		0.045309	0.13967													0.226422		0.063789	0.048455										0.390438		0.091201
							0.032022		0.144557	0.043871													0.041047		0.078369	0.082659										0.298133		0.261335
							0.065729		0.056097	0.534507													0.109901		0.094772	0.057006										0.179304		0.114134
							0.07247		0.096012	0.041185													0.048992		0.069256	0.076958										0.145353		0.110934
							0.063201		0.129454	0.174588													0.04502		0.072902	0.045605										0.210072		0.0496
							0.369091		0.046388	0.086846													0.561421		0.054676	0.065557										0.115115		0.183468
							0.279768		0.031285	0.219354													0.34824		0.058321	0.054156										0.07639		0.308802
							0.324429		0.05286	0.039394													0.092687		0.067434	0.456047										0.144823		0.115201
							0.109548		0.102485	0.081474													0.08077		0.061966	0.037054										0.045622		0.201068
							0.187916		0.043151	0.338431													0.075474		0.111175	0.09976										0.15331		0.158401
							0.417124		0.225466	0.052824													0.357509		0.071079	0.037054										0.177713		0.108801
							0.093537		0.199575	0.477206													0.060909		0.089304	0.041329										0.172408		0.050667
							0.044662		0.107878	0.117287													0.595848		0.153093	0.037054										0.181957		0.093867
							0.370777		0.093854	0.060882													0.189347		0.499376	0.048455										0.053579		0.169601
							0.131457		0.046388	0.057301													0.070178		0.060144	0.061281										0.154371		0.069867
							0.032864		0.046388	0.290084													0.113873		0.072902	0.404742										0.080103		0.189868
							0.128929		0.139163	0.031336													0.263497		0.056499	0.064132										0.08753		0.044267
							0.040448		0.0356	0.248899													0.038399		0.071079	0.118287										0.069494		0.552004
							0.040448		0.037757	0.371558													0.275414		0.049209	0.098335										0.496535		0.038934
							0.084267		0.065806	0.152205													0.240987		0.045563	0.316383										0.20795		0.083734
							0.065729		0.060412	0.12445													0.17081		0.072902	0.085509										0.129969		0.221868
							0.038763		0.038836	0.170111													0.052964		0.067434	0.104036										0.277975		0.878407
							0.058987		0.078751	0.067149													0.046344		0.067434	0.33491										0.074268		0.092801
							0.576389		0.063648	0.219354													0.565393		0.080192	0.171018										0.228639		0.158401
							0.209826		0.250278	0.256957													0.05164		0.102062	0.376239										0.10875		0.082134
							0.895762		0.063648	0.04208													0.174782		0.080192	0.364838										0.148536		0.0624
							0.03792		0.060412	0.786092													0.262173		0.067434	0.39049										0.172408		0.098667
							0.060673		0.197417	0.309781													1.01162		0.235108	0.082659										0.046152		0.072001
							0.1323		0.107878	0.159367													0.162865		0.061966	0.038479										0.18514		0.065067
							0.096065		0.103563	0.25069													0.083419		0.149448	0.057006										0.155963		0.125334
							0.068257		0.043151	0.067149													0.090039		0.298896	0.062706										0.083286		0.046934
							0.032864		0.117587	0.040289													0.721638		0.052854	0.29073										0.062597		0.061334
							0.610096		0.073357	0.053719													0.291303		0.061966	0.277904										0.183548		0.047467
							0.147468		0.05286	0.071626													0.305869		0.112997	0.089784										0.10875		0.037334
							0.035392		0.051782	0.219354													0.079446		0.069256	0.057006										0.056762		0.0368
[truncated: 7,909 more rows]
