# Supplementary material for: Capping protein regulates endosomal trafficking by controlling F-actin density around endocytic vesicles and recruiting RAB5 effectors
Source: eLife. 2021 Nov 19;10:e65910. doi: 10.7554/eLife.65910 (PMC8654373; doi:10.7554/eLife.65910)
Supplement: Figure 5—figure supplement 1—source data 2. [file elife-65910-fig5-figsupp1-data2.xlsx]

## Sheet: Figure S5
				Figure S5D				Figure S5E
				DP_X	DP_Y			DP_X	DP_Y
				0.083333	41.0082			0.083333	21.9086
				0.1	41.0025			0.1	21.9075
				0.116667	40.9997			0.116667	21.9073
				0.133333	40.9984			0.133333	21.9071
				0.15	40.996			0.15	21.9058
				0.166667	40.995			0.166667	21.9051
				0.183333	40.9934			0.183333	21.9048
				0.2	40.9908			0.2	21.9045
				0.216667	40.9924			0.216667	21.9046
				0.233333	40.9945			0.233333	21.9041
				0.25	40.9951			0.25	21.903
				0.266667	40.996			0.266667	21.9022
				0.283333	40.9971			0.283333	21.9017
				0.3	40.9971			0.3	21.901
				0.316667	40.9982			0.316667	21.9009
				0.333333	41.0002			0.333333	21.9003
				0.35	41.0011			0.35	21.9006
				0.366667	41.0038			0.366667	21.9008
				0.383333	41.0067			0.383333	21.901
				0.4	41.0097			0.4	21.9013
				0.416667	41.0122			0.416667	21.9009
				0.433333	41.0165			0.433333	21.9011
				0.45	41.0175			0.45	21.9009
				0.466667	41.0178			0.466667	21.9012
				0.483333	41.0183			0.483333	21.9014
				0.5	41.0198			0.5	21.9004
				0.516667	41.0214			0.516667	21.8998
				0.533333	41.0221			0.533333	21.9
				0.55	41.0219			0.55	21.8992
				0.566667	41.0207			0.566667	21.8986
				0.583333	41.0183			0.583333	21.8983
				0.6	41.018			0.6	21.8986
				0.616667	41.019			0.616667	21.8981
				0.633333	41.0178			0.633333	21.8977
				0.65	41.0123			0.65	21.8983
				0.666667	41.0092			0.666667	21.8995
				0.683333	41.0073			0.683333	21.8993
				0.7	41.0062			0.7	21.8988
				0.716667	41.005			0.716667	21.8976
				0.733333	40.999			0.733333	21.8967
				0.75	40.9956			0.75	21.8961
				0.766667	40.994			0.766667	21.8947
				0.783333	40.9882			0.783333	21.8935
				0.8	40.9845			0.8	21.8932
				0.816667	40.985			0.816667	21.8929
				0.833333	40.9862			0.833333	21.8929
				0.85	40.987			0.85	21.8919
				0.866667	40.9869			0.866667	21.8913
				0.883333	40.9885			0.883333	21.8906
				0.9	40.9917			0.9	21.8895
				0.916667	40.9908			0.916667	21.8868
				0.933333	40.99			0.933333	21.8843
				0.95	40.9916			0.95	21.884
				0.966667	40.9918			0.966667	21.883
				0.983333	40.9913			0.983333	21.8866
				1	40.9988			1	21.8884
				1.01667	41.0038			1.01667	21.8971
				1.03333	40.9953			1.03333	21.8687
				1.05	40.9919			1.05	21.7764
				1.06667	40.9929			1.06667	21.7711
				1.08333	40.9932			1.08333	21.7609
				1.1	40.9941			1.1	21.7493
				1.11667	40.9947			1.11667	21.7389
				1.13333	40.9945			1.13333	21.7503
				1.15	40.9938			1.15	21.7902
				1.16667	40.9928			1.16667	21.8131
				1.18333	40.9926			1.18333	21.8426
				1.2	40.992			1.2	21.88
				1.21667	40.9911			1.21667	21.8975
				1.23333	40.9898			1.23333	21.9031
				1.25	40.9887			1.25	21.9058
				1.26667	40.9881			1.26667	21.905
				1.28333	40.9883			1.28333	21.9059
				1.3	40.9872			1.3	21.9067
				1.31667	40.9857			1.31667	21.9067
				1.33333	40.9839			1.33333	21.906
				1.35	40.9822			1.35	21.904
				1.36667	40.9806			1.36667	21.9017
				1.38333	40.9798			1.38333	21.9008
				1.4	40.9748			1.4	21.9001
				1.41667	40.9747			1.41667	21.899
				1.43333	40.9914			1.43333	21.8986
				1.45	41.0082			1.45	21.8977
				1.46667	41.0053			1.46667	21.8971
				1.48333	41.003			1.48333	21.896
				1.5	41.0005			1.5	21.894
				1.51667	40.9944			1.51667	21.892
				1.53333	40.9892			1.53333	21.8903
				1.55	40.986			1.55	21.8888
				1.56667	40.9837			1.56667	21.8867
				1.58333	40.9779			1.58333	21.8847
				1.6	40.9742			1.6	21.8826
				1.61667	40.9726			1.61667	21.8819
				1.63333	40.9712			1.63333	21.8818
				1.65	40.97			1.65	21.8818
				1.66667	40.9682			1.66667	21.881
				1.68333	40.9669			1.68333	21.881
				1.7	40.9663			1.7	21.8812
				1.71667	40.965			1.71667	21.8805
				1.73333	40.9624			1.73333	21.8799
				1.75	40.9617			1.75	21.8782
				1.76667	40.9614			1.76667	21.8759
				1.78333	40.9611			1.78333	21.8749
				1.8	40.9614			1.8	21.8747
				1.81667	40.9616			1.81667	21.875
				1.83333	40.9625			1.83333	21.8746
				1.85	40.9611			1.85	21.875
				1.86667	40.9613			1.86667	21.8745
				1.88333	40.9626			1.88333	21.8739
				1.9	40.9632			1.9	21.8736
				1.91667	40.9628			1.91667	21.8738
				1.93333	40.9627			1.93333	21.8738
				1.95	40.9624			1.95	21.8734
				1.96667	40.9624			1.96667	21.8725
				1.98333	40.9626			1.98333	21.8726
				2	40.9621			2	21.8719
				2.01667	40.9607			2.01667	21.8709
				2.03333	40.9584			2.03333	21.8699
				2.05	40.9575			2.05	21.8704
				2.06667	40.9575			2.06667	21.8704
				2.08333	40.9567			2.08333	21.8703
				2.1	40.956			2.1	21.8701
				2.11667	40.9567			2.11667	21.8697
				2.13333	40.9572			2.13333	21.869
				2.15	40.9569			2.15	21.8685
				2.16667	40.9557			2.16667	21.8678
				2.18333	40.9534			2.18333	21.8677
				2.2	40.9511			2.2	21.8677
				2.21667	40.9499			2.21667	21.8681
				2.23333	40.9487			2.23333	21.8681
				2.25	40.948			2.25	21.8681
				2.26667	40.9473			2.26667	21.868
				2.28333	40.9464			2.28333	21.8684
				2.3	40.9452			2.3	21.8688
				2.31667	40.9446			2.31667	21.8691
				2.33333	40.9442			2.33333	21.8693
				2.35	40.9449			2.35	21.8692
				2.36667	40.9444			2.36667	21.8687
				2.38333	40.9443			2.38333	21.8685
				2.4	40.9433			2.4	21.8689
				2.41667	40.9425			2.41667	21.8697
				2.43333	40.9425			2.43333	21.8706
				2.45	40.9417			2.45	21.8711
				2.46667	40.9408			2.46667	21.8708
				2.48333	40.9401			2.48333	21.871
				2.5	40.9398			2.5	21.8713
				2.51667	40.9407			2.51667	21.871
				2.53333	40.9416			2.53333	21.87
				2.55	40.9418			2.55	21.869
				2.56667	40.9421			2.56667	21.8685
				2.58333	40.9419			2.58333	21.8675
				2.6	40.9417			2.6	21.8672
				2.61667	40.9402			2.61667	21.8668
				2.63333	40.9398			2.63333	21.8663
				2.65	40.9397			2.65	21.8656
				2.66667	40.9396			2.66667	21.8649
				2.68333	40.9391			2.68333	21.8649
				2.7	40.9392			2.7	21.8646
				2.71667	40.9395			2.71667	21.8644
				2.73333	40.9402			2.73333	21.8636
				2.75	40.9404			2.75	21.8619
				2.76667	40.9404			2.76667	21.8602
				2.78333	40.9406			2.78333	21.8585
				2.8	40.9403			2.8	21.8578
				2.81667	40.9409			2.81667	21.8576
				2.83333	40.9405			2.83333	21.8573
				2.85	40.9396			2.85	21.8569
				2.86667	40.9395			2.86667	21.856
				2.88333	40.9392			2.88333	21.8547
				2.9	40.9381			2.9	21.854
				2.91667	40.9373			2.91667	21.8531
				2.93333	40.9367			2.93333	21.8531
				2.95	40.9372			2.95	21.8538
				2.96667	40.9371			2.96667	21.853
				2.98333	40.9365			2.98333	21.8529
				3	40.9355			3	21.8524
				3.01667	40.9349			3.01667	21.8513
				3.03333	40.9337			3.03333	21.8515
				3.05	40.9328			3.05	21.8535
				3.06667	40.9321			3.06667	21.8536
				3.08333	40.9308			3.08333	21.8541
				3.1	40.9301			3.1	21.8543
				3.11667	40.9295			3.11667	21.854
				3.13333	40.9292			3.13333	21.8548
				3.15	40.9296			3.15	21.8553
				3.16667	40.9302			3.16667	21.8556
				3.18333	40.9307			3.18333	21.8563
				3.2	40.9302			3.2	21.8572
				3.21667	40.9292			3.21667	21.8571
				3.23333	40.929			3.23333	21.8564
				3.25	40.9286			3.25	21.8553
				3.26667	40.9289			3.26667	21.8557
				3.28333	40.9292			3.28333	21.855
				3.3	40.9293			3.3	21.8546
				3.31667	40.9292			3.31667	21.8543
				3.33333	40.9293			3.33333	21.854
				3.35	40.9298			3.35	21.8533
				3.36667	40.9289			3.36667	21.853
				3.38333	40.9288			3.38333	21.8531
				3.4	40.9278			3.4	21.852
				3.41667	40.9263			3.41667	21.8506
				3.43333	40.9235			3.43333	21.8491
				3.45	40.9233			3.45	21.847
				3.46667	40.925			3.46667	21.8468
				3.48333	40.9234			3.48333	21.8485
				3.5	40.9173			3.5	21.8466
				3.51667	40.9161			3.51667	21.846
				3.53333	40.9212			3.53333	21.8322
				3.55	40.771			3.55	21.7046
				3.56667	40.5794			3.56667	21.4776
				3.58333	40.4475			3.58333	21.2397
				3.6	40.3992			3.6	21.0102
				3.61667	40.4827			3.61667	20.8872
				3.63333	40.5847			3.63333	20.8354
				3.65	40.6821			3.65	20.8486
				3.66667	40.7597			3.66667	20.9477
				3.68333	40.8023			3.68333	21.1199
				3.7	40.809			3.7	21.299
				3.71667	40.8068			3.71667	21.4975
				3.73333	40.809			3.73333	21.6816
				3.75	40.8185			3.75	21.8198
				3.76667	40.8422			3.76667	21.913
				3.78333	40.8692			3.78333	21.9696
				3.8	40.8942			3.8	22.0048
				3.81667	40.9048			3.81667	22.0052
				3.83333	40.9102			3.83333	21.9958
				3.85	40.9104			3.85	21.9872
				3.86667	40.9088			3.86667	21.9766
				3.88333	40.9071			3.88333	21.9471
				3.9	40.9072			3.9	21.9238
				3.91667	40.908			3.91667	21.9149
				3.93333	40.9099			3.93333	21.9112
				3.95	40.9109			3.95	21.9073
				3.96667	40.9117			3.96667	21.9025
				3.98333	40.9121			3.98333	21.8987
				4	40.9128			4	21.8956
				4.01667	40.9132			4.01667	21.8927
				4.03333	40.9135			4.03333	21.8901
				4.05	40.9134			4.05	21.8874
				4.06667	40.9143			4.06667	21.8847
				4.08333	40.9153			4.08333	21.882
				4.1	40.9165			4.1	21.8795
				4.11667	40.9183			4.11667	21.877
				4.13333	40.9194			4.13333	21.8744
				4.15	40.9203			4.15	21.872
				4.16667	40.9206			4.16667	21.8693
				4.18333	40.9207			4.18333	21.8672
				4.2	40.921			4.2	21.8657
				4.21667	40.9215			4.21667	21.8638
				4.23333	40.9215			4.23333	21.8621
				4.25	40.9212			4.25	21.861
				4.26667	40.9214			4.26667	21.8597
				4.28333	40.9214			4.28333	21.8582
				4.3	40.9225			4.3	21.8569
				4.31667	40.9231			4.31667	21.8554
				4.33333	40.9231			4.33333	21.854
				4.35	40.9229			4.35	21.8522
				4.36667	40.9225			4.36667	21.8514
				4.38333	40.9222			4.38333	21.8505
				4.4	40.922			4.4	21.849
				4.41667	40.9218			4.41667	21.8475
				4.43333	40.9207			4.43333	21.8466
				4.45	40.9195			4.45	21.8467
				4.46667	40.9186			4.46667	21.8466
				4.48333	40.9181			4.48333	21.8461
				4.5	40.9175			4.5	21.8461
				4.51667	40.9175			4.51667	21.846
				4.53333	40.9173			4.53333	21.8457
				4.55	40.9169			4.55	21.8455
				4.56667	40.9168			4.56667	21.8449
				4.58333	40.9167			4.58333	21.8453
				4.6	40.916			4.6	21.8452
				4.61667	40.9153			4.61667	21.8445
				4.63333	40.9139			4.63333	21.8445
				4.65	40.9119			4.65	21.8442
				4.66667	40.9111			4.66667	21.8438
				4.68333	40.9101			4.68333	21.8431
				4.7	40.9097			4.7	21.842
				4.71667	40.909			4.71667	21.8417
				4.73333	40.9074			4.73333	21.8418
				4.75	40.9059			4.75	21.8415
				4.76667	40.9051			4.76667	21.8411
				4.78333	40.9042			4.78333	21.8406
				4.8	40.9033			4.8	21.8401
				4.81667	40.9029			4.81667	21.8389
				4.83333	40.9024			4.83333	21.8385
				4.85	40.9011			4.85	21.8385
				4.86667	40.9006			4.86667	21.8391
				4.88333	40.8995			4.88333	21.8396
				4.9	40.8972			4.9	21.8395
				4.91667	40.8952			4.91667	21.8399
				4.93333	40.8939			4.93333	21.8391
				4.95	40.8928			4.95	21.8398
				4.96667	40.8911			4.96667	21.8407
				4.98333	40.8903			4.98333	21.8404
				5	40.89			5	21.8412
				5.01667	40.8895			5.01667	21.8405
				5.03333	40.8883			5.03333	21.8402
				5.05	40.8877			5.05	21.8397
				5.06667	40.8884			5.06667	21.8399
				5.08333	40.8884			5.08333	21.8397
				5.1	40.8886			5.1	21.84
				5.11667	40.8888			5.11667	21.8407
				5.13333	40.8886			5.13333	21.8404
				5.15	40.8883			5.15	21.8396
				5.16667	40.889			5.16667	21.8382
				5.18333	40.8896			5.18333	21.8372
				5.2	40.8899			5.2	21.837
				5.21667	40.8894			5.21667	21.8373
				5.23333	40.8893			5.23333	21.8369
				5.25	40.8889			5.25	21.8358
				5.26667	40.8882			5.26667	21.8358
				5.28333	40.8886			5.28333	21.835
				5.3	40.8903			5.3	21.8355
				5.31667	40.8921			5.31667	21.8361
				5.33333	40.8921			5.33333	21.8367
				5.35	40.8919			5.35	21.8371
				5.36667	40.8916			5.36667	21.8377
				5.38333	40.8914			5.38333	21.8379
				5.4	40.8913			5.4	21.8375
				5.41667	40.8902			5.41667	21.8383
				5.43333	40.889			5.43333	21.8392
				5.45	40.8885			5.45	21.8399
				5.46667	40.8886			5.46667	21.8395
				5.48333	40.8881			5.48333	21.8394
				5.5	40.8884			5.5	21.8395
				5.51667	40.888			5.51667	21.838
				5.53333	40.8874			5.53333	21.8378
				5.55	40.8875			5.55	21.8374
				5.56667	40.8879			5.56667	21.8382
				5.58333	40.8883			5.58333	21.8379
				5.6	40.8891			5.6	21.8376
				5.61667	40.889			5.61667	21.8368
				5.63333	40.8874			5.63333	21.8361
				5.65	40.8862			5.65	21.8355
				5.66667	40.8854			5.66667	21.8342
				5.68333	40.885			5.68333	21.8327
				5.7	40.8844			5.7	21.8314
				5.71667	40.8837			5.71667	21.8317
				5.73333	40.8831			5.73333	21.8322
				5.75	40.8826			5.75	21.832
				5.76667	40.8826			5.76667	21.8317
				5.78333	40.8822			5.78333	21.8322
				5.8	40.8814			5.8	21.8319
				5.81667	40.8804			5.81667	21.8316
				5.83333	40.8795			5.83333	21.8323
				5.85	40.8789			5.85	21.8327
				5.86667	40.8782			5.86667	21.8323
				5.88333	40.8776			5.88333	21.8322
				5.9	40.8766			5.9	21.8329
				5.91667	40.8763			5.91667	21.8346
				5.93333	40.8758			5.93333	21.8353
				5.95	40.8751			5.95	21.835
				5.96667	40.8738			5.96667	21.8345
				5.98333	40.871			5.98333	21.8311
				6	40.8681			6	21.8362
				6.01667	40.8783			6.01667	21.8404
				6.03333	40.8443			6.03333	21.8213
				6.05	40.667			6.05	21.6947
				6.06667	40.5407			6.06667	21.4987
				6.08333	40.4392			6.08333	21.2767
				6.1	40.3902			6.1	21.0424
				6.11667	40.4596			6.11667	20.9407
				6.13333	40.552			6.13333	20.9082
				6.15	40.6509			6.15	20.9103
				6.16667	40.7073			6.16667	21.0073
				6.18333	40.7611			6.18333	21.1562
				6.2	40.7701			6.2	21.3186
				6.21667	40.7726			6.21667	21.4912
				6.23333	40.7793			6.23333	21.6438
				6.25	40.7985			6.25	21.7706
				6.26667	40.8192			6.26667	21.8594
				6.28333	40.8436			6.28333	21.9164
				6.3	40.8729			6.3	21.9455
				6.31667	40.896			6.31667	21.9579
				6.33333	40.9012			6.33333	21.9526
				6.35	40.8995			6.35	21.9432
				6.36667	40.8972			6.36667	21.9273
				6.38333	40.8965			6.38333	21.9122
				6.4	40.8958			6.4	21.8996
				6.41667	40.8974			6.41667	21.8904
				6.43333	40.8979			6.43333	21.8846
				6.45	40.897			6.45	21.8793
				6.46667	40.8968			6.46667	21.8729
				6.48333	40.8965			6.48333	21.8685
				6.5	40.8954			6.5	21.8647
				6.51667	40.8941			6.51667	21.8574
				6.53333	40.8938			6.53333	21.8509
				6.55	40.8942			6.55	21.8462
				6.56667	40.8942			6.56667	21.8436
				6.58333	40.8944			6.58333	21.8448
				6.6	40.8949			6.6	21.8455
				6.61667	40.896			6.61667	21.8452
				6.63333	40.8966			6.63333	21.8439
				6.65	40.8973			6.65	21.842
				6.66667	40.8974			6.66667	21.8407
				6.68333	40.8967			6.68333	21.8395
				6.7	40.8953			6.7	21.8396
				6.71667	40.8938			6.71667	21.8396
				6.73333	40.8931			6.73333	21.8388
				6.75	40.8931			6.75	21.8391
				6.76667	40.8931			6.76667	21.8387
				6.78333	40.8926			6.78333	21.8385
				6.8	40.8923			6.8	21.838
				6.81667	40.892			6.81667	21.8373
				6.83333	40.891			6.83333	21.8351
				6.85	40.8895			6.85	21.8332
				6.86667	40.8884			6.86667	21.8319
				6.88333	40.8872			6.88333	21.8304
				6.9	40.8862			6.9	21.8295
				6.91667	40.8855			6.91667	21.8285
				6.93333	40.8843			6.93333	21.8276
				6.95	40.8818			6.95	21.8265
				6.96667	40.8792			6.96667	21.8254
				6.98333	40.8774			6.98333	21.8239
				7	40.8759			7	21.8225
				7.01667	40.8741			7.01667	21.8216
				7.03333	40.873			7.03333	21.8204
				7.05	40.8723			7.05	21.82
				7.06667	40.8713			7.06667	21.8199
				7.08333	40.8702			7.08333	21.8195
				7.1	40.8696			7.1	21.8188
				7.11667	40.8687			7.11667	21.8193
				7.13333	40.8673			7.13333	21.8198
				7.15	40.8668			7.15	21.8201
				7.16667	40.8668			7.16667	21.8207
				7.18333	40.8671			7.18333	21.8217
				7.2	40.867			7.2	21.8218
				7.21667	40.8668			7.21667	21.8215
				7.23333	40.8661			7.23333	21.8214
				7.25	40.8656			7.25	21.8225
				7.26667	40.8653			7.26667	21.8229
				7.28333	40.8648			7.28333	21.8237
				7.3	40.8641			7.3	21.8244
				7.31667	40.8638			7.31667	21.8253
				7.33333	40.864			7.33333	21.8263
				7.35	40.8647			7.35	21.8278
				7.36667	40.8646			7.36667	21.8278
				7.38333	40.8645			7.38333	21.8271
				7.4	40.864			7.4	21.8251
				7.41667	40.8631			7.41667	21.8244
				7.43333	40.8636			7.43333	21.8237
				7.45	40.8641			7.45	21.8234
				7.46667	40.8644			7.46667	21.8224
				7.48333	40.8648			7.48333	21.8219
				7.5	40.8648			7.5	21.8207
				7.51667	40.864			7.51667	21.8202
				7.53333	40.8632			7.53333	21.8191
				7.55	40.863			7.55	21.8182
				7.56667	40.8631			7.56667	21.8189
				7.58333	40.8637			7.58333	21.8189
				7.6	40.8638			7.6	21.8186
				7.61667	40.8644			7.61667	21.8178
				7.63333	40.8655			7.63333	21.8169
				7.65	40.866			7.65	21.8159
				7.66667	40.8663			7.66667	21.8146
				7.68333	40.8672			7.68333	21.815
				7.7	40.8684			7.7	21.8154
				7.71667	40.8694			7.71667	21.8155
				7.73333	40.8704			7.73333	21.8165
				7.75	40.8707			7.75	21.8165
				7.76667	40.8711			7.76667	21.817
				7.78333	40.8711			7.78333	21.8176
				7.8	40.871			7.8	21.8175
				7.81667	40.8707			7.81667	21.818
				7.83333	40.8714			7.83333	21.8167
				7.85	40.8725			7.85	21.8162
				7.86667	40.8724			7.86667	21.8161
				7.88333	40.8726			7.88333	21.816
				7.9	40.8728			7.9	21.8162
				7.91667	40.8718			7.91667	21.8154
				7.93333	40.8713			7.93333	21.8151
				7.95	40.8711			7.95	21.8157
				7.96667	40.8714			7.96667	21.8165
				7.98333	40.8723			7.98333	21.8165
				8	40.8726			8	21.8166
				8.01667	40.8719			8.01667	21.816
				8.03333	40.871			8.03333	21.8149
				8.05	40.8706			8.05	21.8142
				8.06667	40.8707			8.06667	21.8135
				8.08333	40.8696			8.08333	21.8128
				8.1	40.8687			8.1	21.8129
				8.11667	40.8686			8.11667	21.813
				8.13333	40.8685			8.13333	21.8137
				8.15	40.8676			8.15	21.8135
				8.16667	40.8668			8.16667	21.8133
				8.18333	40.8665			8.18333	21.8135
				8.2	40.8675			8.2	21.8136
				8.21667	40.8681			8.21667	21.8131
				8.23333	40.8684			8.23333	21.813
				8.25	40.8685			8.25	21.8129
				8.26667	40.8686			8.26667	21.8123
				8.28333	40.8686			8.28333	21.8119
				8.3	40.8679			8.3	21.8111
				8.31667	40.8669			8.31667	21.8112
				8.33333	40.8661			8.33333	21.8114
				8.35	40.8657			8.35	21.8119
				8.36667	40.8653			8.36667	21.8113
				8.38333	40.8652			8.38333	21.8109
				8.4	40.8661			8.4	21.8098
				8.41667	40.8672			8.41667	21.8093
				8.43333	40.8672			8.43333	21.8077
				8.45	40.8645			8.45	21.8056
				8.46667	40.863			8.46667	21.8051
				8.48333	40.8631			8.48333	21.8053
				8.5	40.8632			8.5	21.8034
				8.51667	40.8786			8.51667	21.802
				8.53333	40.8465			8.53333	21.8045
				8.55	40.6828			8.55	21.6897
				8.56667	40.5235			8.56667	21.4965
				8.58333	40.3891			8.58333	21.2867
				8.6	40.3171			8.6	21.0685
				8.61667	40.4035			8.61667	20.9857
				8.63333	40.5013			8.63333	20.9484
				8.65	40.6122			8.65	20.9601
				8.66667	40.6988			8.66667	21.0434
				8.68333	40.7308			8.68333	21.1615
				8.7	40.7562			8.7	21.3304
				8.71667	40.7718			8.71667	21.4938
				8.73333	40.7862			8.73333	21.6426
				8.75	40.8152			8.75	21.7588
				8.76667	40.8371			8.76667	21.8344
				8.78333	40.8576			8.78333	21.8849
				8.8	40.8725			8.8	21.9159
				8.81667	40.8798			8.81667	21.9222
				8.83333	40.8866			8.83333	21.9155
				8.85	40.8908			8.85	21.9056
				8.86667	40.8914			8.86667	21.8939
				8.88333	40.891			8.88333	21.8799
				8.9	40.8918			8.9	21.8725
				8.91667	40.893			8.91667	21.8638
				8.93333	40.8962			8.93333	21.8558
				8.95	40.8991			8.95	21.8494
				8.96667	40.898			8.96667	21.8414
				8.98333	40.8963			8.98333	21.8378
				9	40.8956			9	21.8366
				9.01667	40.895			9.01667	21.834
				9.03333	40.894			9.03333	21.8303
				9.05	40.8922			9.05	21.8265
				9.06667	40.8903			9.06667	21.8224
				9.08333	40.888			9.08333	21.8198
				9.1	40.8867			9.1	21.819
				9.11667	40.8856			9.11667	21.818
				9.13333	40.8855			9.13333	21.8167
				9.15	40.8855			9.15	21.8155
				9.16667	40.8847			9.16667	21.8152
				9.18333	40.8842			9.18333	21.8152
				9.2	40.8836			9.2	21.8143
				9.21667	40.8827			9.21667	21.8113
				9.23333	40.8817			9.23333	21.8111
				9.25	40.8805			9.25	21.8107
				9.26667	40.8801			9.26667	21.8103
				9.28333	40.8798			9.28333	21.81
				9.3	40.8793			9.3	21.8097
				9.31667	40.8789			9.31667	21.8092
				9.33333	40.8778			9.33333	21.8078
				9.35	40.877			9.35	21.8076
				9.36667	40.8766			9.36667	21.8074
				9.38333	40.8764			9.38333	21.8064
				9.4	40.8759			9.4	21.8059
				9.41667	40.8754			9.41667	21.8051
				9.43333	40.8747			9.43333	21.8052
				9.45	40.8739			9.45	21.8051
				9.46667	40.873			9.46667	21.8049
				9.48333	40.8723			9.48333	21.8039
				9.5	40.8723			9.5	21.8037
				9.51667	40.8722			9.51667	21.8038
				9.53333	40.8712			9.53333	21.8041
				9.55	40.8697			9.55	21.8042
				9.56667	40.8686			9.56667	21.8046
				9.58333	40.8679			9.58333	21.8042
				9.6	40.8668			9.6	21.8035
				9.61667	40.8657			9.61667	21.8035
				9.63333	40.8651			9.63333	21.8039
				9.65	40.8656			9.65	21.8034
				9.66667	40.8664			9.66667	21.8036
				9.68333	40.8666			9.68333	21.8044
				9.7	40.8661			9.7	21.8049
				9.71667	40.8642			9.71667	21.8054
				9.73333	40.8633			9.73333	21.8044
				9.75	40.8628			9.75	21.8028
				9.76667	40.8627			9.76667	21.8022
				9.78333	40.8615			9.78333	21.8021
				9.8	40.8597			9.8	21.802
				9.81667	40.8594			9.81667	21.8007
				9.83333	40.8588			9.83333	21.7984
				9.85	40.8589			9.85	21.7974
				9.86667	40.8597			9.86667	21.7974
				9.88333	40.8611			9.88333	21.7973
				9.9	40.8616			9.9	21.7965
				9.91667	40.8614			9.91667	21.7968
				9.93333	40.862			9.93333	21.7968
				9.95	40.8624			9.95	21.7966
				9.96667	40.8634			9.96667	21.7954
				9.98333	40.8626			9.98333	21.7943
				10	40.8617			10	21.7936
				10.0167	40.8621			10.0167	21.7933
				10.0333	40.8644			10.0333	21.7938
				10.05	40.8662			10.05	21.7934
				10.0667	40.8673			10.0667	21.7922
				10.0833	40.8681			10.0833	21.792
				10.1	40.868			10.1	21.7934
				10.1167	40.8679			10.1167	21.7936
				10.1333	40.8687			10.1333	21.7942
				10.15	40.8692			10.15	21.7944
				10.1667	40.8691			10.1667	21.7946
				10.1833	40.8682			10.1833	21.7954
				10.2	40.8687			10.2	21.7951
				10.2167	40.8693			10.2167	21.7953
				10.2333	40.8691			10.2333	21.7965
				10.25	40.8691			10.25	21.798
				10.2667	40.8694			10.2667	21.7989
				10.2833	40.8691			10.2833	21.7991
				10.3	40.8689			10.3	21.8002
				10.3167	40.8694			10.3167	21.8008
				10.3333	40.8695			10.3333	21.8006
				10.35	40.8695			10.35	21.8015
				10.3667	40.8698			10.3667	21.8016
				10.3833	40.87			10.3833	21.8027
				10.4	40.8692			10.4	21.8025
				10.4167	40.8693			10.4167	21.8016
				10.4333	40.87			10.4333	21.8008
				10.45	40.8708			10.45	21.8002
				10.4667	40.8707			10.4667	21.7997
				10.4833	40.8708			10.4833	21.7995
				10.5	40.8706			10.5	21.7999
				10.5167	40.871			10.5167	21.7995
				10.5333	40.8713			10.5333	21.7993
				10.55	40.8715			10.55	21.7991
				10.5667	40.8709			10.5667	21.7985
				10.5833	40.8713			10.5833	21.7981
				10.6	40.8716			10.6	21.798
				10.6167	40.8717			10.6167	21.798
				10.6333	40.8713			10.6333	21.7974
				10.65	40.871			10.65	21.7967
				10.6667	40.8697			10.6667	21.7971
				10.6833	40.8691			10.6833	21.7971
				10.7	40.868			10.7	21.7969
				10.7167	40.8677			10.7167	21.7973
				10.7333	40.8686			10.7333	21.7979
				10.75	40.87			10.75	21.7981
				10.7667	40.8704			10.7667	21.7984
				10.7833	40.8696			10.7833	21.7978
				10.8	40.8684			10.8	21.7973
				10.8167	40.8676			10.8167	21.7961
				10.8333	40.8679			10.8333	21.7954
				10.85	40.869			10.85	21.7951
				10.8667	40.8679			10.8667	21.7943
				10.8833	40.8677			10.8833	21.7939
				10.9	40.8672			10.9	21.7948
				10.9167	40.8672			10.9167	21.7944
				10.9333	40.8698			10.9333	21.7933
				10.95	40.8698			10.95	21.791
				10.9667	40.8646			10.9667	21.7907
				10.9833	40.8615			10.9833	21.7906
				11	40.8684			11	21.7941
				11.0167	40.8719			11.0167	21.793
				11.0333	40.8642			11.0333	21.7986
				11.05	40.7079			11.05	21.6835
				11.0667	40.5478			11.0667	21.5178
				11.0833	40.4235			11.0833	21.3524
				11.1	40.3228			11.1	21.1553
				11.1167	40.3603			11.1167	21.0693
				11.1333	40.4666			11.1333	21.0408
				11.15	40.5858			11.15	21.0326
				11.1667	40.6651			11.1667	21.1006
				11.1833	40.7164			11.1833	21.2089
				11.2	40.7399			11.2	21.3628
				11.2167	40.8642			11.2167	21.4847
				11.2333	41.1597			11.2333	21.6394
				11.25	41.402			11.25	21.7463
				11.2667	41.5113			11.2667	21.8198
				11.2833	41.528			11.2833	21.8726
				11.3	41.4819			11.3	21.8871
				11.3167	41.3879			11.3167	21.8864
				11.3333	41.2796			11.3333	21.885
				11.35	41.1663			11.35	21.8804
				11.3667	41.0808			11.3667	21.8722
				11.3833	41.0185			11.3833	21.8672
				11.4	40.9475			11.4	21.8602
				11.4167	40.8996			11.4167	21.8507
				11.4333	40.8562			11.4333	21.8438
				11.45	40.8176			11.45	21.8368
				11.4667	40.8027			11.4667	21.8305
				11.4833	40.7877			11.4833	21.826
				11.5	40.7717			11.5	21.8209
				11.5167	40.7621			11.5167	21.8164
				11.5333	40.7565			11.5333	21.8146
				11.55	40.7473			11.55	21.812
				11.5667	40.7366			11.5667	21.8103
				11.5833	40.7265			11.5833	21.8074
				11.6	40.7202			11.6	21.8052
				11.6167	40.716			11.6167	21.8031
				11.6333	40.7076			11.6333	21.8009
				11.65	40.7031			11.65	21.7989
				11.6667	40.6988			11.6667	21.7967
				11.6833	40.6946			11.6833	21.7953
				11.7	40.6927			11.7	21.7947
				11.7167	40.6892			11.7167	21.7941
				11.7333	40.6856			11.7333	21.7935
				11.75	40.6838			11.75	21.7928
				11.7667	40.6831			11.7667	21.7924
				11.7833	40.681			11.7833	21.7912
				11.8	40.6793			11.8	21.7897
				11.8167	40.6782			11.8167	21.7882
				11.8333	40.6763			11.8333	21.7873
				11.85	40.6746			11.85	21.7868
				11.8667	40.6723			11.8667	21.7861
				11.8833	40.6711			11.8833	21.7858
				11.9	40.669			11.9	21.7859
				11.9167	40.6656			11.9167	21.7858
				11.9333	40.6633			11.9333	21.7862
				11.95	40.6609			11.95	21.7862
				11.9667	40.6579			11.9667	21.787
				11.9833	40.654			11.9833	21.788
				12	40.6524			12	21.7881
				12.0167	40.6532			12.0167	21.7881
				12.0333	40.6539			12.0333	21.7885
				12.05	40.655			12.05	21.7889
				12.0667	40.6543			12.0667	21.7889
				12.0833	40.6527			12.0833	21.7889
				12.1	40.6527			12.1	21.7892
				12.1167	40.653			12.1167	21.7908
				12.1333	40.6535			12.1333	21.7921
				12.15	40.6534			12.15	21.7929
				12.1667	40.6534			12.1667	21.7939
				12.1833	40.6534			12.1833	21.794
				12.2	40.6528			12.2	21.7937
				12.2167	40.6519			12.2167	21.7938
				12.2333	40.6496			12.2333	21.7943
				12.25	40.6465			12.25	21.7945
				12.2667	40.6438			12.2667	21.7941
				12.2833	40.6422			12.2833	21.7935
				12.3	40.6421			12.3	21.7925
				12.3167	40.6424			12.3167	21.7918
				12.3333	40.6415			12.3333	21.7916
				12.35	40.6412			12.35	21.7911
				12.3667	40.6425			12.3667	21.7913
				12.3833	40.6425			12.3833	21.7902
				12.4	40.6428			12.4	21.7894
				12.4167	40.6432			12.4167	21.7888
				12.4333	40.6428			12.4333	21.7876
				12.45	40.642			12.45	21.7857
				12.4667	40.6428			12.4667	21.7845
				12.4833	40.6435			12.4833	21.7839
				12.5	40.6448			12.5	21.783
				12.5167	40.6449			12.5167	21.7824
				12.5333	40.6445			12.5333	21.7812
				12.55	40.6452			12.55	21.7797
				12.5667	40.6471			12.5667	21.7787
				12.5833	40.6477			12.5833	21.7778
				12.6	40.6489			12.6	21.7777
				12.6167	40.6484			12.6167	21.7783
				12.6333	40.6478			12.6333	21.7784
				12.65	40.6471			12.65	21.7789
				12.6667	40.648			12.6667	21.7791
				12.6833	40.6493			12.6833	21.7788
				12.7	40.6495			12.7	21.7789
				12.7167	40.6498			12.7167	21.7802
				12.7333	40.65			12.7333	21.7811
				12.75	40.6492			12.75	21.7813
				12.7667	40.6471			12.7667	21.7813
				12.7833	40.6439			12.7833	21.7815
				12.8	40.6414			12.8	21.7813
				12.8167	40.6401			12.8167	21.7815
				12.8333	40.6406			12.8333	21.7817
				12.85	40.6413			12.85	21.7815
				12.8667	40.6414			12.8667	21.7823
				12.8833	40.64			12.8833	21.7835
				12.9	40.6382			12.9	21.7839
				12.9167	40.6376			12.9167	21.7839
				12.9333	40.6381			12.9333	21.7832
				12.95	40.6384			12.95	21.7832
				12.9667	40.6393			12.9667	21.7826
				12.9833	40.6406			12.9833	21.7822
				13	40.6426			13	21.7813
				13.0167	40.6423			13.0167	21.7804
				13.0333	40.6422			13.0333	21.7795
				13.05	40.6414			13.05	21.7795
				13.0667	40.6401			13.0667	21.7796
				13.0833	40.6387			13.0833	21.7785
				13.1	40.6386			13.1	21.7789
				13.1167	40.6382			13.1167	21.7802
				13.1333	40.6362			13.1333	21.7814
				13.15	40.6343			13.15	21.782
				13.1667	40.6328			13.1667	21.7822
				13.1833	40.6318			13.1833	21.782
				13.2	40.6322			13.2	21.782
				13.2167	40.6328			13.2167	21.7827
				13.2333	40.6311			13.2333	21.7832
				13.25	40.631			13.25	21.7838
				13.2667	40.6318			13.2667	21.7845
				13.2833	40.6335			13.2833	21.7856
				13.3	40.6339			13.3	21.7857
				13.3167	40.6347			13.3167	21.7847
				13.3333	40.6354			13.3333	21.784
				13.35	40.634			13.35	21.7848
				13.3667	40.6333			13.3667	21.7865
				13.3833	40.6328			13.3833	21.7869
				13.4	40.6323			13.4	21.7863
				13.4167	40.6324			13.4167	21.7849
				13.4333	40.6328			13.4333	21.7845
				13.45	40.6311			13.45	21.7826
				13.4667	40.6302			13.4667	21.7815
				13.4833	40.6338			13.4833	21.782
				13.5	40.6393			13.5	21.7876
				13.5167	40.6361			13.5167	21.7864
				13.5333	40.6093			13.5333	21.7776
				13.55	40.4164			13.55	21.6996
				13.5667	40.2239			13.5667	21.5582
				13.5833	40.075			13.5833	21.4082
				13.6	40.0082			13.6	21.2485
				13.6167	40.0914			13.6167	21.1413
				13.6333	40.2538			13.6333	21.1191
				13.65	40.3862			13.65	21.1235
				13.6667	40.4842			13.6667	21.1703
				13.6833	40.5423			13.6833	21.2522
				13.7	40.5827			13.7	21.376
				13.7167	40.6029			13.7167	21.5103
				13.7333	40.6065			13.7333	21.6256
				13.75	40.6204			13.75	21.711
				13.7667	40.6306			13.7667	21.7884
				13.7833	40.6428			13.7833	21.8391
				13.8	40.6498			13.8	21.8682
				13.8167	40.6555			13.8167	21.8647
				13.8333	40.6591			13.8333	21.864
				13.85	40.6607			13.85	21.8583
				13.8667	40.6619			13.8667	21.8516
				13.8833	40.6622			13.8833	21.8444
				13.9	40.6622			13.9	21.837
				13.9167	40.6637			13.9167	21.83
				13.9333	40.6671			13.9333	21.8245
				13.95	40.6686			13.95	21.8193
				13.9667	40.6695			13.9667	21.8148
				13.9833	40.6698			13.9833	21.8084
				14	40.6697			14	21.8047
				14.0167	40.6689			14.0167	21.8015
				14.0333	40.6682			14.0333	21.7983
				14.05	40.6671			14.05	21.7942
				14.0667	40.6659			14.0667	21.7907
				14.0833	40.6658			14.0833	21.7879
				14.1	40.666			14.1	21.7848
				14.1167	40.6652			14.1167	21.783
				14.1333	40.6641			14.1333	21.7802
				14.15	40.6629			14.15	21.7781
				14.1667	40.6616			14.1667	21.7773
				14.1833	40.66			14.1833	21.777
				14.2	40.6591			14.2	21.7766
				14.2167	40.6582			14.2167	21.7767
				14.2333	40.6568			14.2333	21.7757
				14.25	40.6546			14.25	21.775
				14.2667	40.6531			14.2667	21.7743
				14.2833	40.652			14.2833	21.7744
				14.3	40.652			14.3	21.7736
				14.3167	40.6513			14.3167	21.775
				14.3333	40.6508			14.3333	21.7761
				14.35	40.6506			14.35	21.7765
				14.3667	40.651			14.3667	21.7766
				14.3833	40.6511			14.3833	21.7765
				14.4	40.6499			14.4	21.7785
				14.4167	40.6486			14.4167	21.7795
				14.4333	40.6498			14.4333	21.7803
				14.45	40.6531			14.45	21.7788
				14.4667	40.655			14.4667	21.7762
				14.4833	40.6569			14.4833	21.7742
				14.5	40.6594			14.5	21.7737
				14.5167	40.6617			14.5167	21.7733
				14.5333	40.6642			14.5333	21.7741
				14.55	40.6671			14.55	21.7715
				14.5667	40.6696			14.5667	21.77
				14.5833	40.6713			14.5833	21.7697
				14.6	40.6723			14.6	21.77
				14.6167	40.6732			14.6167	21.7708
				14.6333	40.6754			14.6333	21.7706
				14.65	40.6779			14.65	21.7701
				14.6667	40.6787			14.6667	21.7698
				14.6833	40.6798			14.6833	21.7701
				14.7	40.6813			14.7	21.7692
				14.7167	40.6814			14.7167	21.7687
				14.7333	40.6809			14.7333	21.7696
				14.75	40.681			14.75	21.7706
				14.7667	40.6811			14.7667	21.7712
				14.7833	40.6812			14.7833	21.7727
				14.8	40.681			14.8	21.7741
				14.8167	40.6808			14.8167	21.7757
				14.8333	40.6817			14.8333	21.777
				14.85	40.6822			14.85	21.7776
				14.8667	40.6827			14.8667	21.7774
				14.8833	40.683			14.8833	21.7772
				14.9	40.6833			14.9	21.777
				14.9167	40.6847			14.9167	21.7768
				14.9333	40.6858			14.9333	21.7776
				14.95	40.6859			14.95	21.7778
				14.9667	40.6874			14.9667	21.775
				14.9833	40.6892			14.9833	21.7724
				15	40.6904			15	21.7717
				15.0167	40.6914			15.0167	21.7707
				15.0333	40.6922			15.0333	21.771
				15.05	40.692			15.05	21.7707
				15.0667	40.6913			15.0667	21.7695
				15.0833	40.6909			15.0833	21.7693
				15.1	40.691			15.1	21.7682
				15.1167	40.6918			15.1167	21.7655
				15.1333	40.6921			15.1333	21.7642
				15.15	40.691			15.15	21.7632
				15.1667	40.6897			15.1667	21.763
				15.1833	40.6892			15.1833	21.7637
				15.2	40.688			15.2	21.7643
				15.2167	40.6882			15.2167	21.7637
				15.2333	40.6877			15.2333	21.7647
				15.25	40.6875			15.25	21.7662
				15.2667	40.6873			15.2667	21.7671
				15.2833	40.6878			15.2833	21.7677
				15.3	40.6889			15.3	21.768
				15.3167	40.6887			15.3167	21.7677
				15.3333	40.6893			15.3333	21.767
				15.35	40.6892			15.35	21.7666
				15.3667	40.6905			15.3667	21.7662
				15.3833	40.6934			15.3833	21.7658
				15.4	40.6954			15.4	21.7661
				15.4167	40.6955			15.4167	21.767
				15.4333	40.6947			15.4333	21.768
				15.45	40.6944			15.45	21.7681
				15.4667	40.6941			15.4667	21.7684
				15.4833	40.6941			15.4833	21.7681
				15.5	40.6931			15.5	21.7676
				15.5167	40.6924			15.5167	21.7675
				15.5333	40.6917			15.5333	21.7672
				15.55	40.6913			15.55	21.7672
				15.5667	40.6914			15.5667	21.7667
				15.5833	40.6896			15.5833	21.766
				15.6	40.6893			15.6	21.7662
				15.6167	40.6908			15.6167	21.7666
				15.6333	40.6931			15.6333	21.7671
				15.65	40.6956			15.65	21.7668
				15.6667	40.6989			15.6667	21.7665
				15.6833	40.7016			15.6833	21.766
				15.7	40.705			15.7	21.7658
				15.7167	40.7085			15.7167	21.7655
				15.7333	40.7111			15.7333	21.7652
				15.75	40.7144			15.75	21.7645
				15.7667	40.7173			15.7667	21.7645
				15.7833	40.7188			15.7833	21.765
				15.8	40.7208			15.8	21.7655
				15.8167	40.7227			15.8167	21.7657
				15.8333	40.7241			15.8333	21.7655
				15.85	40.7262			15.85	21.7659
				15.8667	40.7272			15.8667	21.7651
				15.8833	40.7306			15.8833	21.7643
				15.9	40.7341			15.9	21.7636
				15.9167	40.7387			15.9167	21.7641
				15.9333	40.745			15.9333	21.7648
				15.95	40.751			15.95	21.7661
				15.9667	40.7585			15.9667	21.7676
				15.9833	40.7672			15.9833	21.7667
				16	40.772			16	21.7639
				16.0167	40.7791			16.0167	21.7624
				16.0333	40.7764			16.0333	21.7513
				16.05	40.6097			16.05	21.6593
				16.0667	40.4177			16.0667	21.5238
				16.0833	40.2806			16.0833	21.3987
				16.1	40.195			16.1	21.2696
				16.1167	40.2622			16.1167	21.1917
				16.1333	40.3788			16.1333	21.159
				16.15	40.4717			16.15	21.1556
				16.1667	40.5863			16.1667	21.2089
				16.1833	40.6347			16.1833	21.2868
				16.2	40.68			16.2	21.4025
				16.2167	40.6867			16.2167	21.5176
				16.2333	40.6959			16.2333	21.6259
				16.25	40.7044			16.25	21.7174
				16.2667	40.6081			16.2667	21.7782
				16.2833	40.6473			16.2833	21.8186
				16.3	40.7615			16.3	21.839
				16.3167	40.8159			16.3167	21.8411
				16.3333	40.8349			16.3333	21.8389
				16.35	40.8437			16.35	21.8357
				16.3667	40.8433			16.3667	21.8293
				16.3833	40.8352			16.3833	21.8217
				16.4	40.8275			16.4	21.8147
				16.4167	40.8244			16.4167	21.81
				16.4333	40.8224			16.4333	21.8045
				16.45	40.8184			16.45	21.8002
				16.4667	40.8152			16.4667	21.7965
				16.4833	40.8145			16.4833	21.7923
				16.5	40.8134			16.5	21.7886
				16.5167	40.8097			16.5167	21.7854
				16.5333	40.807			16.5333	21.783
				16.55	40.8074			16.55	21.7786
				16.5667	40.807			16.5667	21.7739
				16.5833	40.8053			16.5833	21.7719
				16.6	40.8051			16.6	21.7717
				16.6167	40.8056			16.6167	21.7702
				16.6333	40.8061			16.6333	21.7691
				16.65	40.806			16.65	21.7686
				16.6667	40.8059			16.6667	21.7681
				16.6833	40.8058			16.6833	21.7676
				16.7	40.8059			16.7	21.7667
				16.7167	40.8071			16.7167	21.7663
				16.7333	40.8084			16.7333	21.7655
				16.75	40.8104			16.75	21.7642
				16.7667	40.8112			16.7667	21.7631
				16.7833	40.8116			16.7833	21.7631
				16.8	40.8118			16.8	21.7626
				16.8167	40.8127			16.8167	21.7624
				16.8333	40.8141			16.8333	21.7621
				16.85	40.8151			16.85	21.7618
				16.8667	40.8154			16.8667	21.7611
				16.8833	40.8152			16.8833	21.7599
				16.9	40.8162			16.9	21.7586
				16.9167	40.817			16.9167	21.7577
				16.9333	40.8178			16.9333	21.7577
				16.95	40.818			16.95	21.7578
				16.9667	40.8182			16.9667	21.757
				16.9833	40.8192			16.9833	21.7565
				17	40.82			17	21.7561
				17.0167	40.8214			17.0167	21.7557
				17.0333	40.8237			17.0333	21.7553
				17.05	40.8253			17.05	21.7554
				17.0667	40.8267			17.0667	21.7549
				17.0833	40.8278			17.0833	21.7548
				17.1	40.8298			17.1	21.7545
				17.1167	40.8312			17.1167	21.7542
				17.1333	40.8321			17.1333	21.7538
				17.15	40.8335			17.15	21.7534
				17.1667	40.8358			17.1667	21.7534
				17.1833	40.8384			17.1833	21.7535
				17.2	40.841			17.2	21.7537
				17.2167	40.8447			17.2167	21.7538
				17.2333	40.8478			17.2333	21.7537
				17.25	40.8497			17.25	21.7536
				17.2667	40.8519			17.2667	21.7537
				17.2833	40.8541			17.2833	21.7536
				17.3	40.8563			17.3	21.7539
				17.3167	40.8579			17.3167	21.7539
				17.3333	40.86			17.3333	21.7547
				17.35	40.8612			17.35	21.7545
				17.3667	40.8615			17.3667	21.7533
				17.3833	40.8611			17.3833	21.7524
				17.4	40.8612			17.4	21.7527
				17.4167	40.8613			17.4167	21.7531
				17.4333	40.8607			17.4333	21.7531
				17.45	40.8601			17.45	21.7535
				17.4667	40.8603			17.4667	21.7535
				17.4833	40.8601			17.4833	21.7539
				17.5	40.8599			17.5	21.7542
				17.5167	40.8594			17.5167	21.7547
				17.5333	40.8584			17.5333	21.7551
				17.55	40.8565			17.55	21.7545
				17.5667	40.855			17.5667	21.7532
				17.5833	40.8545			17.5833	21.7529
				17.6	40.8541			17.6	21.7529
				17.6167	40.8531			17.6167	21.7529
				17.6333	40.8522			17.6333	21.7529
				17.65	40.8514			17.65	21.7528
				17.6667	40.8513			17.6667	21.7519
				17.6833	40.8515			17.6833	21.7524
				17.7	40.8526			17.7	21.7533
				17.7167	40.854			17.7167	21.7536
				17.7333	40.8544			17.7333	21.7546
				17.75	40.8545			17.75	21.7547
				17.7667	40.8552			17.7667	21.7543
				17.7833	40.8556			17.7833	21.7532
				17.8	40.8554			17.8	21.7524
				17.8167	40.8558			17.8167	21.7526
				17.8333	40.8567			17.8333	21.7537
				17.85	40.8572			17.85	21.7546
				17.8667	40.8573			17.8667	21.7562
				17.8833	40.8571			17.8833	21.7568
				17.9	40.8563			17.9	21.7563
				17.9167	40.8561			17.9167	21.7561
				17.9333	40.8558			17.9333	21.7562
				17.95	40.8561			17.95	21.7565
				17.9667	40.8566			17.9667	21.7555
				17.9833	40.857			17.9833	21.7538
				18	40.8567			18	21.7527
				18.0167	40.8561			18.0167	21.7512
				18.0333	40.8545			18.0333	21.7506
				18.05	40.853			18.05	21.7508
				18.0667	40.852			18.0667	21.7513
				18.0833	40.8513			18.0833	21.7524
				18.1	40.8501			18.1	21.7524
				18.1167	40.8489			18.1167	21.753
				18.1333	40.8479			18.1333	21.753
				18.15	40.8468			18.15	21.7524
				18.1667	40.8455			18.1667	21.7512
				18.1833	40.8444			18.1833	21.7504
				18.2	40.8438			18.2	21.7503
				18.2167	40.8446			18.2167	21.75
				18.2333	40.8445			18.2333	21.7504
				18.25	40.8437			18.25	21.7501
				18.2667	40.8437			18.2667	21.7497
				18.2833	40.8434			18.2833	21.7491
				18.3	40.8421			18.3	21.7484
				18.3167	40.8421			18.3167	21.7488
				18.3333	40.8422			18.3333	21.7488
				18.35	40.8422			18.35	21.749
				18.3667	40.8429			18.3667	21.7485
				18.3833	40.8427			18.3833	21.7472
				18.4	40.8428			18.4	21.7462
				18.4167	40.8437			18.4167	21.7457
				18.4333	40.8455			18.4333	21.7449
				18.45	40.8457			18.45	21.743
				18.4667	40.8445			18.4667	21.7413
				18.4833	40.8438			18.4833	21.7433
				18.5	40.8512			18.5	21.748
				18.5167	40.8481			18.5167	21.7495
				18.5333	40.8617			18.5333	21.7489
				18.55	40.7571			18.55	21.7015
				18.5667	40.5395			18.5667	21.5757
				18.5833	40.3714			18.5833	21.4577
				18.6	40.2615			18.6	21.3164
				18.6167	40.2776			18.6167	21.2361
				18.6333	40.4165			18.6333	21.1971
				18.65	40.5377			18.65	21.1693
				18.6667	40.6462			18.6667	21.1898
				18.6833	40.6964			18.6833	21.259
				18.7	40.7207			18.7	21.3564
				18.7167	40.7376			18.7167	21.4587
				18.7333	40.7514			18.7333	21.5837
				18.75	40.7682			18.75	21.671
				18.7667	40.8012			18.7667	21.7349
				18.7833	40.8402			18.7833	21.7943
				18.8	40.8704			18.8	21.8167
				18.8167	40.8908			18.8167	21.8226
				18.8333	40.9007			18.8333	21.8201
				18.85	40.8949			18.85	21.8183
				18.8667	40.8914			18.8667	21.8153
				18.8833	40.888			18.8833	21.8086
				18.9	40.8842			18.9	21.8018
				18.9167	40.8828			18.9167	21.7972
				18.9333	40.8791			18.9333	21.7915
				18.95	40.8749			18.95	21.7843
				18.9667	40.872			18.9667	21.7807
				18.9833	40.8683			18.9833	21.7776
				19	40.8634			19	21.774
				19.0167	40.8614			19.0167	21.7703
				19.0333	40.8598			19.0333	21.7678
				19.05	40.8578			19.05	21.7628
				19.0667	40.8564			19.0667	21.7595
				19.0833	40.8549			19.0833	21.7572
				19.1	40.853			19.1	21.7554
				19.1167	40.8512			19.1167	21.7532
				19.1333	40.8499			19.1333	21.751
				19.15	40.8481			19.15	21.7494
				19.1667	40.8473			19.1667	21.7485
				19.1833	40.8473			19.1833	21.7483
				19.2	40.8481			19.2	21.7482
				19.2167	40.8485			19.2167	21.7475
				19.2333	40.8488			19.2333	21.7465
				19.25	40.8495			19.25	21.7454
				19.2667	40.8494			19.2667	21.7448
				19.2833	40.8496			19.2833	21.7441
				19.3	40.8494			19.3	21.7437
				19.3167	40.8497			19.3167	21.7434
				19.3333	40.85			19.3333	21.7431
				19.35	40.8501			19.35	21.7426
				19.3667	40.8504			19.3667	21.7416
				19.3833	40.8517			19.3833	21.7416
				19.4	40.8534			19.4	21.7421
				19.4167	40.8542			19.4167	21.7426
				19.4333	40.8543			19.4333	21.7429
				19.45	40.8554			19.45	21.7435
				19.4667	40.8563			19.4667	21.743
				19.4833	40.8563			19.4833	21.7431
				19.5	40.8551			19.5	21.7427
				19.5167	40.853			19.5167	21.7423
				19.5333	40.8516			19.5333	21.7431
				19.55	40.8507			19.55	21.744
				19.5667	40.8499			19.5667	21.7442
				19.5833	40.8498			19.5833	21.7451
				19.6	40.8496			19.6	21.7452
				19.6167	40.8493			19.6167	21.7457
				19.6333	40.8489			19.6333	21.7459
				19.65	40.8483			19.65	21.7462
				19.6667	40.8503			19.6667	21.7446
				19.6833	40.8517			19.6833	21.7444
				19.7	40.8504			19.7	21.7452
				19.7167	40.85			19.7167	21.745
				19.7333	40.8494			19.7333	21.7443
				19.75	40.8501			19.75	21.7446
				19.7667	40.8507			19.7667	21.7448
				19.7833	40.8499			19.7833	21.7447
				19.8	40.8511			19.8	21.7446
				19.8167	40.8533			19.8167	21.7431
				19.8333	40.853			19.8333	21.7431
				19.85	40.8524			19.85	21.7422
				19.8667	40.8527			19.8667	21.7409
				19.8833	40.8536			19.8833	21.7407
				19.9	40.8546			19.9	21.7405
				19.9167	40.8553			19.9167	21.7405
				19.9333	40.8549			19.9333	21.7408
				19.95	40.8541			19.95	21.7416
				19.9667	40.8561			19.9667	21.7418
				19.9833	40.8565			19.9833	21.7412
				20	40.8543			20	21.74
				20.0167	40.8541			20.0167	21.7391
				20.0333	40.8534			20.0333	21.7388
				20.05	40.8514			20.05	21.7382
				20.0667	40.8502			20.0667	21.7378
				20.0833	40.8488			20.0833	21.7372
				20.1	40.8498			20.1	21.7376
				20.1167	40.8504			20.1167	21.7395
				20.1333	40.8497			20.1333	21.7421
				20.15	40.849			20.15	21.744
				20.1667	40.8489			20.1667	21.745
				20.1833	40.8486			20.1833	21.7446
				20.2	40.8478			20.2	21.7447
				20.2167	40.8463			20.2167	21.7454
				20.2333	40.8454			20.2333	21.7449
				20.25	40.8443			20.25	21.7443
				20.2667	40.8436			20.2667	21.7441
				20.2833	40.8429			20.2833	21.7441
				20.3	40.8431			20.3	21.7456
				20.3167	40.8445			20.3167	21.7465
				20.3333	40.8459			20.3333	21.7465
				20.35	40.8468			20.35	21.7467
				20.3667	40.8481			20.3667	21.7464
				20.3833	40.8491			20.3833	21.7453
				20.4	40.8495			20.4	21.744
				20.4167	40.8496			20.4167	21.7421
				20.4333	40.8507			20.4333	21.74
				20.45	40.8505			20.45	21.74
				20.4667	40.8504			20.4667	21.7394
				20.4833	40.8509			20.4833	21.7395
				20.5	40.8514			20.5	21.7396
				20.5167	40.8512			20.5167	21.7399
				20.5333	40.851			20.5333	21.7401
				20.55	40.8508			20.55	21.7408
				20.5667	40.8515			20.5667	21.7411
				20.5833	40.8511			20.5833	21.7411
				20.6	40.8498			20.6	21.7403
				20.6167	40.8489			20.6167	21.7394
				20.6333	40.8485			20.6333	21.7387
				20.65	40.8477			20.65	21.738
				20.6667	40.847			20.6667	21.7377
				20.6833	40.8469			20.6833	21.7374
				20.7	40.8461			20.7	21.7377
				20.7167	40.8452			20.7167	21.7379
				20.7333	40.8444			20.7333	21.7377
				20.75	40.8432			20.75	21.7376
				20.7667	40.8424			20.7667	21.7372
				20.7833	40.842			20.7833	21.7367
				20.8	40.8412			20.8	21.7361
				20.8167	40.8402			20.8167	21.7363
				20.8333	40.8401			20.8333	21.7367
				20.85	40.8402			20.85	21.7363
				20.8667	40.8402			20.8667	21.7354
				20.8833	40.8395			20.8833	21.7351
				20.9	40.8402			20.9	21.7349
				20.9167	40.8405			20.9167	21.7354
				20.9333	40.8398			20.9333	21.7353
				20.95	40.8387			20.95	21.7349
				20.9667	40.8392			20.9667	21.7368
				20.9833	40.8393			20.9833	21.7375
				21	40.8411			21	21.7399
				21.0167	40.8376			21.0167	21.7302
				21.0333	40.8529			21.0333	21.7354
				21.05	40.7266			21.05	21.6837
				21.0667	40.5169			21.0667	21.5688
				21.0833	40.3727			21.0833	21.4303
				21.1	40.2658			21.1	21.2874
				21.1167	40.2912			21.1167	21.2154
				21.1333	40.4306			21.1333	21.2003
				21.15	40.5566			21.15	21.1868
				21.1667	40.6634			21.1667	21.2161
				21.1833	40.741			21.1833	21.2886
				21.2	40.7608			21.2	21.3666
				21.2167	40.7591			21.2167	21.4677
				21.2333	40.762			21.2333	21.5561
				21.25	40.7676			21.25	21.6472
				21.2667	40.7914			21.2667	21.7317
				21.2833	40.8344			21.2833	21.7587
				21.3	40.8712			21.3	21.7874
				21.3167	40.886			21.3167	21.8046
				21.3333	40.8889			21.3333	21.8044
				21.35	40.8884			21.35	21.8055
				21.3667	40.8857			21.3667	21.8055
				21.3833	40.8831			21.3833	21.8045
				21.4	40.8806			21.4	21.8051
				21.4167	40.8766			21.4167	21.7959
				21.4333	40.8729			21.4333	21.7702
				21.45	40.8699			21.45	21.7568
				21.4667	40.8671			21.4667	21.7496
				21.4833	40.8649			21.4833	21.7458
				21.5	40.862			21.5	21.7436
				21.5167	40.86			21.5167	21.7437
				21.5333	40.8581			21.5333	21.7457
				21.55	40.855			21.55	21.7445
				21.5667	40.8524			21.5667	21.7439
				21.5833	40.8504			21.5833	21.7416
				21.6	40.8487			21.6	21.7405
				21.6167	40.8483			21.6167	21.7401
				21.6333	40.8471			21.6333	21.7409
				21.65	40.8461			21.65	21.7405
				21.6667	40.8457			21.6667	21.7398
				21.6833	40.8455			21.6833	21.74
				21.7	40.8463			21.7	21.7384
				21.7167	40.8471			21.7167	21.7371
				21.7333	40.8471			21.7333	21.7368
				21.75	40.8482			21.75	21.7367
				21.7667	40.8517			21.7667	21.736
				21.7833	40.8543			21.7833	21.7341
				21.8	40.8551			21.8	21.7325
				21.8167	40.8558			21.8167	21.7323
				21.8333	40.8562			21.8333	21.7314
				21.85	40.8566			21.85	21.7311
				21.8667	40.8573			21.8667	21.7306
				21.8833	40.8598			21.8833	21.7301
				21.9	40.861			21.9	21.7305
				21.9167	40.8609			21.9167	21.7311
				21.9333	40.8618			21.9333	21.7304
				21.95	40.8624			21.95	21.7292
				21.9667	40.8625			21.9667	21.7289
				21.9833	40.8613			21.9833	21.729
				22	40.8597			22	21.7294
				22.0167	40.8591			22.0167	21.7294
				22.0333	40.8581			22.0333	21.7298
				22.05	40.8574			22.05	21.7296
				22.0667	40.8559			22.0667	21.729
				22.0833	40.853			22.0833	21.7282
				22.1	40.8502			22.1	21.7277
				22.1167	40.8482			22.1167	21.7281
				22.1333	40.8473			22.1333	21.7276
				22.15	40.8465			22.15	21.7268
				22.1667	40.8458			22.1667	21.7264
				22.1833	40.8453			22.1833	21.7269
				22.2	40.8446			22.2	21.7266
				22.2167	40.8444			22.2167	21.7271
				22.2333	40.8443			22.2333	21.7277
				22.25	40.8437			22.25	21.7277
				22.2667	40.8422			22.2667	21.7274
				22.2833	40.842			22.2833	21.7271
				22.3	40.8422			22.3	21.7274
				22.3167	40.8427			22.3167	21.727
				22.3333	40.8434			22.3333	21.7274
				22.35	40.8437			22.35	21.7276
				22.3667	40.8439			22.3667	21.7285
				22.3833	40.844			22.3833	21.7284
				22.4	40.8443			22.4	21.7287
				22.4167	40.8453			22.4167	21.7291
				22.4333	40.8464			22.4333	21.7295
				22.45	40.8465			22.45	21.7291
				22.4667	40.8471			22.4667	21.7285
				22.4833	40.8481			22.4833	21.7294
				22.5	40.8486			22.5	21.7292
				22.5167	40.8487			22.5167	21.7293
				22.5333	40.8492			22.5333	21.7297
				22.55	40.8497			22.55	21.7294
				22.5667	40.8502			22.5667	21.7296
				22.5833	40.8513			22.5833	21.7305
				22.6	40.8521			22.6	21.731
				22.6167	40.8527			22.6167	21.7306
				22.6333	40.8529			22.6333	21.731
				22.65	40.8525			22.65	21.7295
				22.6667	40.8519			22.6667	21.7285
				22.6833	40.8523			22.6833	21.7287
				22.7	40.8529			22.7	21.7288
				22.7167	40.8529			22.7167	21.7286
				22.7333	40.8528			22.7333	21.7283
				22.75	40.8527			22.75	21.7294
				22.7667	40.8527			22.7667	21.7289
				22.7833	40.8535			22.7833	21.7279
				22.8	40.8531			22.8	21.7272
				22.8167	40.8517			22.8167	21.7258
				22.8333	40.8516			22.8333	21.7247
				22.85	40.8516			22.85	21.7243
				22.8667	40.8514			22.8667	21.7232
				22.8833	40.8509			22.8833	21.721
				22.9	40.8502			22.9	21.7209
				22.9167	40.8493			22.9167	21.7204
				22.9333	40.8484			22.9333	21.7201
				22.95	40.8478			22.95	21.7204
				22.9667	40.8478			22.9667	21.7205
				22.9833	40.8487			22.9833	21.7197
				23	40.8494			23	21.7191
				23.0167	40.8487			23.0167	21.7182
				23.0333	40.8477			23.0333	21.7179
				23.05	40.8468			23.05	21.7173
				23.0667	40.8459			23.0667	21.7171
				23.0833	40.8454			23.0833	21.7171
				23.1	40.845			23.1	21.7171
				23.1167	40.8447			23.1167	21.7172
				23.1333	40.8454			23.1333	21.7179
				23.15	40.8465			23.15	21.7175
				23.1667	40.8476			23.1667	21.7181
				23.1833	40.8481			23.1833	21.7183
				23.2	40.8501			23.2	21.7186
				23.2167	40.8511			23.2167	21.7186
				23.2333	40.8511			23.2333	21.7194
				23.25	40.8517			23.25	21.7188
				23.2667	40.8522			23.2667	21.7181
				23.2833	40.8519			23.2833	21.7187
				23.3	40.8527			23.3	21.7193
				23.3167	40.8543			23.3167	21.7201
				23.3333	40.8553			23.3333	21.7207
				23.35	40.8565			23.35	21.7215
				23.3667	40.8585			23.3667	21.7214
				23.3833	40.8616			23.3833	21.7215
				23.4	40.8645			23.4	21.7224
				23.4167	40.8651			23.4167	21.723
				23.4333	40.8644			23.4333	21.723
				23.45	40.8639			23.45	21.7223
				23.4667	40.8669			23.4667	21.7218
				23.4833	40.8706			23.4833	21.7252
				23.5	40.8713			23.5	21.7249
				23.5167	40.8743			23.5167	21.7207
				23.5333	40.8692			23.5333	21.7206
				23.55	40.7642			23.55	21.6756
				23.5667	40.5386			23.5667	21.5557
				23.5833	40.3808			23.5833	21.4443
				23.6	40.2687			23.6	21.3162
				23.6167	40.3095			23.6167	21.2245
				23.6333	40.4885			23.6333	21.2193
				23.65	40.6303			23.65	21.2049
				23.6667	40.7244			23.6667	21.2107
				23.6833	40.7801			23.6833	21.2655
				23.7	40.792			23.7	21.3513
				23.7167	40.7874			23.7167	21.4398
				23.7333	40.7838			23.7333	21.5504
				23.75	40.7804			23.75	21.6433
				23.7667	40.8077			23.7667	21.7077
				23.7833	40.8488			23.7833	21.7593
				23.8	40.8697			23.8	21.7853
				23.8167	40.8788			23.8167	21.7881
				23.8333	40.888			23.8333	21.79
				23.85	40.8886			23.85	21.7892
				23.8667	40.8854			23.8667	21.7849
				23.8833	40.8841			23.8833	21.7785
				23.9	40.881			23.9	21.7701
				23.9167	40.8796			23.9167	21.7663
				23.9333	40.8782			23.9333	21.7605
				23.95	40.8768			23.95	21.7523
				23.9667	40.8767			23.9667	21.7436
				23.9833	40.8762			23.9833	21.7398
				24	40.8729			24	21.7362
				24.0167	40.87			24.0167	21.7342
				24.0333	40.8674			24.0333	21.734
				24.05	40.8651			24.05	21.7324
				24.0667	40.8635			24.0667	21.7311
				24.0833	40.862			24.0833	21.7302
				24.1	40.8607			24.1	21.7266
				24.1167	40.8587			24.1167	21.7244
				24.1333	40.8583			24.1333	21.723
				24.15	40.8571			24.15	21.7225
				24.1667	40.8555			24.1667	21.7224
				24.1833	40.8549			24.1833	21.7225
				24.2	40.8557			24.2	21.7222
				24.2167	40.8566			24.2167	21.7222
				24.2333	40.8567			24.2333	21.7218
				24.25	40.8563			24.25	21.7207
				24.2667	40.8559			24.2667	21.7197
				24.2833	40.8554			24.2833	21.7184
				24.3	40.8574			24.3	21.7167
				24.3167	40.8585			24.3167	21.7151
				24.3333	40.859			24.3333	21.7141
				24.35	40.8601			24.35	21.7132
				24.3667	40.8606			24.3667	21.7121
				24.3833	40.8616			24.3833	21.7123
				24.4	40.8629			24.4	21.7129
				24.4167	40.8643			24.4167	21.7127
				24.4333	40.8649			24.4333	21.7126
				24.45	40.8661			24.45	21.7121
				24.4667	40.868			24.4667	21.7113
				24.4833	40.8688			24.4833	21.7101
				24.5	40.8682			24.5	21.7091
				24.5167	40.8682			24.5167	21.709
				24.5333	40.8679			24.5333	21.709
				24.55	40.8679			24.55	21.709
				24.5667	40.8689			24.5667	21.7088
				24.5833	40.8692			24.5833	21.7095
				24.6	40.8693			24.6	21.7095
				24.6167	40.8695			24.6167	21.7107
				24.6333	40.8702			24.6333	21.7115
				24.65	40.8704			24.65	21.7127
				24.6667	40.8705			24.6667	21.713
				24.6833	40.8704			24.6833	21.713
				24.7	40.8699			24.7	21.7125
				24.7167	40.8696			24.7167	21.7113
				24.7333	40.8694			24.7333	21.7112
				24.75	40.8687			24.75	21.7122
				24.7667	40.868			24.7667	21.7115
				24.7833	40.867			24.7833	21.7114
				24.8	40.8661			24.8	21.712
				24.8167	40.8653			24.8167	21.7125
				24.8333	40.8657			24.8333	21.713
				24.85	40.8661			24.85	21.7135
				24.8667	40.8655			24.8667	21.7135
				24.8833	40.8648			24.8833	21.7129
				24.9	40.8644			24.9	21.7131
				24.9167	40.864			24.9167	21.7122
				24.9333	40.8635			24.9333	21.7113
				24.95	40.8629			24.95	21.7111
				24.9667	40.862			24.9667	21.7111
				24.9833	40.8616			24.9833	21.7102
				25	40.8609			25	21.7098
				25.0167	40.861			25.0167	21.7086
				25.0333	40.8619			25.0333	21.7075
				25.05	40.8612			25.05	21.7073
				25.0667	40.8608			25.0667	21.7078
				25.0833	40.8613			25.0833	21.7078
				25.1	40.8618			25.1	21.7078
				25.1167	40.8624			25.1167	21.7075
				25.1333	40.8626			25.1333	21.7071
				25.15	40.8635			25.15	21.7065
				25.1667	40.8636			25.1667	21.7068
				25.1833	40.8636			25.1833	21.7072
				25.2	40.8633			25.2	21.7078
				25.2167	40.8633			25.2167	21.7085
				25.2333	40.8632			25.2333	21.7086
				25.25	40.8631			25.25	21.7085
				25.2667	40.8638			25.2667	21.7085
				25.2833	40.8641			25.2833	21.7088
				25.3	40.8643			25.3	21.7097
				25.3167	40.8648			25.3167	21.71
				25.3333	40.8661			25.3333	21.7102
				25.35	40.8675			25.35	21.7107
				25.3667	40.8679			25.3667	21.7099
				25.3833	40.8684			25.3833	21.7096
				25.4	40.8685			25.4	21.7094
				25.4167	40.8677			25.4167	21.7093
				25.4333	40.868			25.4333	21.7099
				25.45	40.8686			25.45	21.7112
				25.4667	40.8687			25.4667	21.7113
				25.4833	40.8695			25.4833	21.7104
				25.5	40.8688			25.5	21.7096
				25.5167	40.869			25.5167	21.7091
				25.5333	40.8699			25.5333	21.7086
				25.55	40.8705			25.55	21.7085
				25.5667	40.8703			25.5667	21.7081
				25.5833	40.8702			25.5833	21.707
				25.6	40.8699			25.6	21.7061
				25.6167	40.8695			25.6167	21.7061
				25.6333	40.8695			25.6333	21.7057
				25.65	40.869			25.65	21.7062
				25.6667	40.8684			25.6667	21.7067
				25.6833	40.8665			25.6833	21.7066
				25.7	40.8641			25.7	21.7071
				25.7167	40.8627			25.7167	21.7083
				25.7333	40.8612			25.7333	21.7083
				25.75	40.8599			25.75	21.708
				25.7667	40.8586			25.7667	21.708
				25.7833	40.8574			25.7833	21.7091
				25.8	40.8568			25.8	21.7099
				25.8167	40.8561			25.8167	21.7109
				25.8333	40.8548			25.8333	21.7103
				25.85	40.8532			25.85	21.7101
				25.8667	40.8531			25.8667	21.7101
				25.8833	40.8523			25.8833	21.7106
				25.9	40.8503			25.9	21.7113
				25.9167	40.8492			25.9167	21.7114
				25.9333	40.8466			25.9333	21.7116
				25.95	40.8467			25.95	21.7099
				25.9667	40.8487			25.9667	21.7094
				25.9833	40.8543			25.9833	21.7059
				26	40.8548			26	21.7016
				26.0167	40.8624			26.0167	21.7041
				26.0333	40.8765			26.0333	21.7051
				26.05	40.7893			26.05	21.666
				26.0667	40.5258			26.0667	21.5466
				26.0833	40.3552			26.0833	21.4452
				26.1	40.2555			26.1	21.3192
				26.1167	40.2857			26.1167	21.2314
				26.1333	40.4696			26.1333	21.2281
				26.15	40.6051			26.15	21.2118
				26.1667	40.7206			26.1667	21.2232
				26.1833	40.7717			26.1833	21.2533
				26.2	40.7778			26.2	21.3204
				26.2167	40.7761			26.2167	21.4265
				26.2333	40.7783			26.2333	21.5227
				26.25	40.7824			26.25	21.6054
				26.2667	40.8035			26.2667	21.6839
				26.2833	40.8388			26.2833	21.7372
				26.3	40.8787			26.3	21.7707
				26.3167	40.9052			26.3167	21.777
				26.3333	40.9053			26.3333	21.7786
				26.35	40.9076			26.35	21.7775
				26.3667	40.9078			26.3667	21.7722
				26.3833	40.9044			26.3833	21.7673
				26.4	40.901			26.4	21.7617
				26.4167	40.897			26.4167	21.7575
				26.4333	40.8932			26.4333	21.7523
				26.45	40.8899			26.45	21.7455
				26.4667	40.8869			26.4667	21.7403
				26.4833	40.8844			26.4833	21.7354
				26.5	40.8812			26.5	21.7302
				26.5167	40.8791			26.5167	21.724
				26.5333	40.8775			26.5333	21.7179
				26.55	40.8765			26.55	21.7126
				26.5667	40.8746			26.5667	21.708
				26.5833	40.8727			26.5833	21.7056
				26.6	40.8712			26.6	21.7045
				26.6167	40.8694			26.6167	21.7042
				26.6333	40.8674			26.6333	21.7039
				26.65	40.8664			26.65	21.7023
				26.6667	40.8663			26.6667	21.7006
				26.6833	40.8666			26.6833	21.6985
				26.7	40.8665			26.7	21.6962
				26.7167	40.8642			26.7167	21.6965
				26.7333	40.8634			26.7333	21.697
				26.75	40.863			26.75	21.698
				26.7667	40.8625			26.7667	21.6987
				26.7833	40.863			26.7833	21.6994
				26.8	40.8637			26.8	21.7002
				26.8167	40.8638			26.8167	21.701
				26.8333	40.8644			26.8333	21.7014
				26.85	40.8646			26.85	21.7022
				26.8667	40.8652			26.8667	21.703
				26.8833	40.8648			26.8833	21.7035
				26.9	40.865			26.9	21.7031
				26.9167	40.8649			26.9167	21.7026
				26.9333	40.8652			26.9333	21.7022
				26.95	40.8654			26.95	21.7013
				26.9667	40.8651			26.9667	21.7013
				26.9833	40.8654			26.9833	21.7017
				27	40.8659			27	21.7023
				27.0167	40.8663			27.0167	21.7021
				27.0333	40.8664			27.0333	21.7017
				27.05	40.8663			27.05	21.7023
				27.0667	40.8671			27.0667	21.7021
				27.0833	40.8679			27.0833	21.701
				27.1	40.8684			27.1	21.7009
				27.1167	40.8686			27.1167	21.7005
				27.1333	40.8695			27.1333	21.7001
				27.15	40.8707			27.15	21.701
				27.1667	40.8711			27.1667	21.7009
				27.1833	40.8707			27.1833	21.6998
				27.2	40.8698			27.2	21.7
				27.2167	40.8692			27.2167	21.7006
				27.2333	40.8681			27.2333	21.7017
				27.25	40.8674			27.25	21.7032
				27.2667	40.8665			27.2667	21.7035
				27.2833	40.8661			27.2833	21.7033
				27.3	40.8657			27.3	21.7032
				27.3167	40.8663			27.3167	21.7028
				27.3333	40.8672			27.3333	21.7017
				27.35	40.8677			27.35	21.7006
				27.3667	40.8678			27.3667	21.7009
				27.3833	40.8676			27.3833	21.6997
				27.4	40.8666			27.4	21.6986
				27.4167	40.8664			27.4167	21.697
				27.4333	40.8661			27.4333	21.697
				27.45	40.8653			27.45	21.6969
				27.4667	40.8635			27.4667	21.6952
				27.4833	40.8616			27.4833	21.6948
				27.5	40.8603			27.5	21.6953
				27.5167	40.8594			27.5167	21.6936
				27.5333	40.8593			27.5333	21.6924
				27.55	40.8595			27.55	21.6927
				27.5667	40.8597			27.5667	21.6923
				27.5833	40.8594			27.5833	21.6927
				27.6	40.859			27.6	21.6938
				27.6167	40.8602			27.6167	21.6937
				27.6333	40.861			27.6333	21.6937
				27.65	40.8614			27.65	21.6947
				27.6667	40.861			27.6667	21.6949
				27.6833	40.8607			27.6833	21.6947
				27.7	40.8626			27.7	21.695
				27.7167	40.8646			27.7167	21.6965
				27.7333	40.8651			27.7333	21.698
				27.75	40.8654			27.75	21.6986
				27.7667	40.8665			27.7667	21.6996
				27.7833	40.8687			27.7833	21.6996
				27.8	40.8697			27.8	21.6998
				27.8167	40.8698			27.8167	21.6993
				27.8333	40.87			27.8333	21.6991
				27.85	40.8709			27.85	21.6995
				27.8667	40.8716			27.8667	21.7
				27.8833	40.872			27.8833	21.7002
				27.9	40.8717			27.9	21.6998
				27.9167	40.8715			27.9167	21.6996
				27.9333	40.8724			27.9333	21.6999
				27.95	40.8727			27.95	21.7009
				27.9667	40.8723			27.9667	21.7004
				27.9833	40.8709			27.9833	21.6996
				28	40.8694			28	21.6989
				28.0167	40.8681			28.0167	21.6983
				28.0333	40.8672			28.0333	21.697
				28.05	40.8672			28.05	21.6965
				28.0667	40.8676			28.0667	21.6964
				28.0833	40.8669			28.0833	21.6962
				28.1	40.8677			28.1	21.6962
				28.1167	40.8679			28.1167	21.6962
				28.1333	40.868			28.1333	21.6962
				28.15	40.8679			28.15	21.6959
				28.1667	40.8686			28.1667	21.6948
				28.1833	40.869			28.1833	21.6934
				28.2	40.8689			28.2	21.6929
				28.2167	40.8701			28.2167	21.6935
				28.2333	40.8712			28.2333	21.6932
				28.25	40.8714			28.25	21.6929
				28.2667	40.8717			28.2667	21.693
				28.2833	40.8722			28.2833	21.6932
				28.3	40.8726			28.3	21.6931
				28.3167	40.8745			28.3167	21.6931
				28.3333	40.8757			28.3333	21.6924
				28.35	40.8764			28.35	21.693
				28.3667	40.8771			28.3667	21.6929
				28.3833	40.8769			28.3833	21.6919
				28.4	40.8772			28.4	21.6913
				28.4167	40.8789			28.4167	21.6911
				28.4333	40.8795			28.4333	21.6919
				28.45	40.8791			28.45	21.6924
				28.4667	40.8809			28.4667	21.6924
				28.4833	40.8815			28.4833	21.6914
				28.5	40.8803			28.5	21.6896
				28.5167	40.877			28.5167	21.6939
				28.5333	40.8821			28.5333	21.6907
				28.55	40.8312			28.55	21.6807
				28.5667	40.6093			28.5667	21.5791
				28.5833	40.4114			28.5833	21.4464
				28.6	40.3016			28.6	21.3299
				28.6167	40.3129			28.6167	21.2397
				28.6333	40.4563			28.6333	21.2153
				28.65	40.5813			28.65	21.2028
				28.6667	40.6887			28.6667	21.2221
				28.6833	40.7623			28.6833	21.2665
				28.7	40.7873			28.7	21.33
				28.7167	40.7899			28.7167	21.4205
				28.7333	40.7979			28.7333	21.5165
				28.75	40.8067			28.75	21.5924
				28.7667	40.8365			28.7667	21.6623
				28.7833	40.8551			28.7833	21.707
				28.8	40.8673			28.8	21.7413
				28.8167	40.8756			28.8167	21.7568
				28.8333	40.8788			28.8333	21.7676
				28.85	40.8793			28.85	21.7657
				28.8667	40.8775			28.8667	21.7618
				28.8833	40.8773			28.8833	21.754
				28.9	40.8765			28.9	21.747
				28.9167	40.8754			28.9167	21.7423
				28.9333	40.8759			28.9333	21.7336
				28.95	40.8741			28.95	21.7276
				28.9667	40.8738			28.9667	21.7221
				28.9833	40.8733			28.9833	21.7193
				29	40.8718			29	21.7166
				29.0167	40.87			29.0167	21.7119
				29.0333	40.8681			29.0333	21.7071
				29.05	40.8667			29.05	21.7045
				29.0667	40.8653			29.0667	21.7017
				29.0833	40.8639			29.0833	21.6978
				29.1	40.8625			29.1	21.6963
				29.1167	40.8625			29.1167	21.6951
				29.1333	40.8624			29.1333	21.6942
				29.15	40.8613			29.15	21.6926
				29.1667	40.8601			29.1667	21.6914
				29.1833	40.8595			29.1833	21.6911
				29.2	40.8593			29.2	21.6901
				29.2167	40.8598			29.2167	21.689
				29.2333	40.8606			29.2333	21.689
				29.25	40.8604			29.25	21.6882
				29.2667	40.8603			29.2667	21.6873
				29.2833	40.8613			29.2833	21.6862
				29.3	40.8625			29.3	21.6854
				29.3167	40.8634			29.3167	21.6851
				29.3333	40.8642			29.3333	21.6847
				29.35	40.8651			29.35	21.685
				29.3667	40.8667			29.3667	21.6853
				29.3833	40.8681			29.3833	21.6854
				29.4	40.8693			29.4	21.6854
				29.4167	40.8707			29.4167	21.6857
				29.4333	40.8718			29.4333	21.686
				29.45	40.8728			29.45	21.6858
				29.4667	40.8736			29.4667	21.6856
				29.4833	40.8748			29.4833	21.6858
				29.5	40.8763			29.5	21.6865
				29.5167	40.8769			29.5167	21.6874
				29.5333	40.8769			29.5333	21.6878
				29.55	40.8764			29.55	21.6884
				29.5667	40.8764			29.5667	21.6885
				29.5833	40.8766			29.5833	21.6888
				29.6	40.8769			29.6	21.6887
				29.6167	40.8766			29.6167	21.6893
				29.6333	40.8758			29.6333	21.6885
				29.65	40.8754			29.65	21.6875
				29.6667	40.8754			29.6667	21.6872
				29.6833	40.8749			29.6833	21.6867
				29.7	40.8741			29.7	21.686
				29.7167	40.8728			29.7167	21.6853
				29.7333	40.872			29.7333	21.6848
				29.75	40.872			29.75	21.6843
				29.7667	40.8714			29.7667	21.6837
				29.7833	40.8708			29.7833	21.6841
				29.8	40.8707			29.8	21.6844
				29.8167	40.87			29.8167	21.6838
				29.8333	40.869			29.8333	21.6822
				29.85	40.8683			29.85	21.6815
				29.8667	40.8678			29.8667	21.6817
				29.8833	40.8674			29.8833	21.6814
				29.9	40.8674			29.9	21.6808
				29.9167	40.8679			29.9167	21.6804
				29.9333	40.8682			29.9333	21.6812
				29.95	40.8684			29.95	21.6812
				29.9667	40.8687			29.9667	21.6819
				29.9833	40.8684			29.9833	21.6822
				30	40.8672			30	21.682
				30.0167	40.8672			30.0167	21.6818
				30.0333	40.8677			30.0333	21.6816
				30.05	40.8682			30.05	21.6816
				30.0667	40.8686			30.0667	21.681
				30.0833	40.8682			30.0833	21.6803
				30.1	40.8683			30.1	21.6807
				30.1167	40.8689			30.1167	21.6812
				30.1333	40.8684			30.1333	21.6816
				30.15	40.8679			30.15	21.6812
				30.1667	40.8682			30.1667	21.6808
				30.1833	40.8685			30.1833	21.6808
				30.2	40.8675			30.2	21.6811
				30.2167	40.8674			30.2167	21.682
				30.2333	40.8676			30.2333	21.6824
				30.25	40.868			30.25	21.6817
				30.2667	40.8681			30.2667	21.6814
				30.2833	40.8681			30.2833	21.682
				30.3	40.8688			30.3	21.6818
				30.3167	40.8686			30.3167	21.6822
				30.3333	40.869			30.3333	21.6826
				30.35	40.8693			30.35	21.6835
				30.3667	40.8689			30.3667	21.6836
				30.3833	40.8681			30.3833	21.6829
				30.4	40.8682			30.4	21.6829
				30.4167	40.8679			30.4167	21.6838
				30.4333	40.8668			30.4333	21.6853
				30.45	40.8653			30.45	21.6848
				30.4667	40.8655			30.4667	21.6851
				30.4833	40.8658			30.4833	21.6855
				30.5	40.866			30.5	21.6856
				30.5167	40.8662			30.5167	21.6857
				30.5333	40.8668			30.5333	21.687
				30.55	40.8668			30.55	21.6856
				30.5667	40.8657			30.5667	21.6839
				30.5833	40.8645			30.5833	21.6842
				30.6	40.864			30.6	21.6848
				30.6167	40.8643			30.6167	21.6845
				30.6333	40.8651			30.6333	21.6845
				30.65	40.8652			30.65	21.6847
				30.6667	40.8647			30.6667	21.6845
				30.6833	40.8644			30.6833	21.6823
				30.7	40.8646			30.7	21.6811
				30.7167	40.8652			30.7167	21.6802
				30.7333	40.8646			30.7333	21.6801
				30.75	40.8646			30.75	21.6794
				30.7667	40.8653			30.7667	21.6787
				30.7833	40.8662			30.7833	21.6783
				30.8	40.8664			30.8	21.6782
				30.8167	40.8675			30.8167	21.6778
				30.8333	40.8693			30.8333	21.6774
				30.85	40.8705			30.85	21.6776
				30.8667	40.8704			30.8667	21.677
				30.8833	40.8716			30.8833	21.6755
				30.9	40.8728			30.9	21.6736
				30.9167	40.8728			30.9167	21.6721
				30.9333	40.8735			30.9333	21.6726
				30.95	40.8746			30.95	21.6722
				30.9667	40.8756			30.9667	21.672
				30.9833	40.8793			30.9833	21.6715
				31	40.8823			31	21.6702
				31.0167	40.8778			31.0167	21.6702
				31.0333	40.8711			31.0333	21.6606
				31.05	40.8627			31.05	21.6521
				31.0667	40.6805			31.0667	21.5795
				31.0833	40.5036			31.0833	21.4692
				31.1	40.3911			31.1	21.3621
				31.1167	40.36			31.1167	21.2676
				31.1333	40.4506			31.1333	21.2317
				31.15	40.5679			31.15	21.2333
				31.1667	40.6658			31.1667	21.2324
				31.1833	40.7299			31.1833	21.2561
				31.2	40.7708			31.2	21.3106
				31.2167	40.7691			31.2167	21.3912
				31.2333	40.772			31.2333	21.4965
				31.25	40.7834			31.25	21.5788
				31.2667	40.806			31.2667	21.6412
				31.2833	40.8404			31.2833	21.6961
				31.3	40.8574			31.3	21.7348
				31.3167	40.8749			31.3167	21.7534
				31.3333	40.8912			31.3333	21.747
				31.35	40.8934			31.35	21.7427
				31.3667	40.8925			31.3667	21.7375
				31.3833	40.8894			31.3833	21.7316
				31.4	40.8871			31.4	21.7264
				31.4167	40.8842			31.4167	21.7202
				31.4333	40.8821			31.4333	21.7155
				31.45	40.8814			31.45	21.712
				31.4667	40.8806			31.4667	21.7074
				31.4833	40.8802			31.4833	21.7024
				31.5	40.8787			31.5	21.6992
				31.5167	40.8759			31.5167	21.6962
				31.5333	40.8725			31.5333	21.6942
				31.55	40.8691			31.55	21.6911
				31.5667	40.8669			31.5667	21.6874
				31.5833	40.8652			31.5833	21.6855
				31.6	40.863			31.6	21.6835
				31.6167	40.8621			31.6167	21.6808
				31.6333	40.8612			31.6333	21.6791
				31.65	40.8602			31.65	21.6777
				31.6667	40.8591			31.6667	21.6767
				31.6833	40.8581			31.6833	21.6755
				31.7	40.8576			31.7	21.6747
				31.7167	40.8574			31.7167	21.6731
				31.7333	40.8581			31.7333	21.6714
				31.75	40.8577			31.75	21.6715
				31.7667	40.8573			31.7667	21.6712
				31.7833	40.8573			31.7833	21.6713
				31.8	40.858			31.8	21.6712
				31.8167	40.8584			31.8167	21.6717
				31.8333	40.8593			31.8333	21.6718
				31.85	40.8607			31.85	21.6719
				31.8667	40.8615			31.8667	21.6715
				31.8833	40.8634			31.8833	21.6707
				31.9	40.8641			31.9	21.6715
				31.9167	40.8645			31.9167	21.6731
				31.9333	40.8655			31.9333	21.6733
				31.95	40.8662			31.95	21.6731
				31.9667	40.8669			31.9667	21.6736
				31.9833	40.868			31.9833	21.6741
				32	40.8688			32	21.6744
				32.0167	40.8693			32.0167	21.675
				32.0333	40.8703			32.0333	21.6761
				32.05	40.8697			32.05	21.6766
				32.0667	40.8681			32.0667	21.677
				32.0833	40.8678			32.0833	21.6768
				32.1	40.8684			32.1	21.6766
				32.1167	40.8681			32.1167	21.6747
				32.1333	40.8672			32.1333	21.6731
				32.15	40.8667			32.15	21.6723
				32.1667	40.8662			32.1667	21.6716
				32.1833	40.8656			32.1833	21.6711
				32.2	40.8642			32.2	21.6702
				32.2167	40.8638			32.2167	21.6688
				32.2333	40.8627			32.2333	21.6684
				32.25	40.8621			32.25	21.668
				32.2667	40.8612			32.2667	21.6682
				32.2833	40.8601			32.2833	21.6687
				32.3	40.859			32.3	21.6692
				32.3167	40.8577			32.3167	21.6697
				32.3333	40.8572			32.3333	21.67
				32.35	40.8582			32.35	21.6707
				32.3667	40.8594			32.3667	21.6702
				32.3833	40.8604			32.3833	21.6695
				32.4	40.8615			32.4	21.6689
				32.4167	40.8625			32.4167	21.669
				32.4333	40.8626			32.4333	21.6695
				32.45	40.8626			32.45	21.6705
				32.4667	40.8629			32.4667	21.6714
				32.4833	40.863			32.4833	21.6716
				32.5	40.8638			32.5	21.6713
				32.5167	40.8642			32.5167	21.6713
				32.5333	40.8638			32.5333	21.6704
				32.55	40.864			32.55	21.67
				32.5667	40.8653			32.5667	21.6717
				32.5833	40.8667			32.5833	21.6719
				32.6	40.8679			32.6	21.6713
				32.6167	40.8689			32.6167	21.6707
				32.6333	40.8704			32.6333	21.6685
				32.65	40.8717			32.65	21.6684
				32.6667	40.8725			32.6667	21.6677
				32.6833	40.8725			32.6833	21.6679
				32.7	40.8722			32.7	21.6677
				32.7167	40.8718			32.7167	21.6676
				32.7333	40.8715			32.7333	21.6671
				32.75	40.8712			32.75	21.6675
				32.7667	40.872			32.7667	21.6677
				32.7833	40.8729			32.7833	21.6663
				32.8	40.8738			32.8	21.6666
				32.8167	40.8748			32.8167	21.667
				32.8333	40.8759			32.8333	21.667
				32.85	40.8769			32.85	21.6654
				32.8667	40.8774			32.8667	21.6637
				32.8833	40.8775			32.8833	21.6641
				32.9	40.8782			32.9	21.6651
				32.9167	40.8797			32.9167	21.6659
				32.9333	40.8812			32.9333	21.6664
				32.95	40.8816			32.95	21.6676
				32.9667	40.8813			32.9667	21.669
				32.9833	40.8813			32.9833	21.6697
				33	40.8818			33	21.6704
				33.0167	40.8832			33.0167	21.6713
				33.0333	40.8846			33.0333	21.671
				33.05	40.8847			33.05	21.6705
				33.0667	40.8836			33.0667	21.6702
				33.0833	40.8831			33.0833	21.671
				33.1	40.8828			33.1	21.6717
				33.1167	40.8825			33.1167	21.6724
				33.1333	40.8818			33.1333	21.6719
				33.15	40.8812			33.15	21.672
				33.1667	40.88			33.1667	21.6721
				33.1833	40.8803			33.1833	21.672
				33.2	40.8813			33.2	21.6715
				33.2167	40.8816			33.2167	21.6705
				33.2333	40.8815			33.2333	21.6692
				33.25	40.881			33.25	21.6683
				33.2667	40.8795			33.2667	21.6677
				33.2833	40.8787			33.2833	21.6665
				33.3	40.8782			33.3	21.6654
				33.3167	40.8784			33.3167	21.6643
				33.3333	40.8788			33.3333	21.6643
				33.35	40.8786			33.35	21.6636
				33.3667	40.8781			33.3667	21.6623
[truncated: 910 more rows]
