# Supplementary material for: Capping protein regulates endosomal trafficking by controlling F-actin density around endocytic vesicles and recruiting RAB5 effectors
Source: eLife. 2021 Nov 19;10:e65910. doi: 10.7554/eLife.65910 (PMC8654373; doi:10.7554/eLife.65910)
Supplement: Figure 5—source data 2. [file elife-65910-fig5-data2.xlsx]

## Sheet: Sheet1
																											Figure 5D
	Figure 5E				Fiugure 5F				Figure 5G					Figure 5J	Number						Size						Data Alignment: None
																											Data Alignment Step: 0
	pearson‘s coefficient（Rab5a/EEA1）				Pearson‘s Coefficients(Rab5a/Rabaptin5)				Pearson‘s Coefficients(Rab5a/Rabex5)					Rabaptin-5 -sg	-	+	-	+			Rabaptin-5 -sg	-	+	-	+		G:\Biolayer-interferometry\20210514\biotin-capz+rabaptin5	210514_001.frd	210514_002.frd	210514_003.frd	210514_004.frd	210514_005.frd	210514_006.frd	210514_007.frd	210514_008.frd
	scramble-sg	Capzβ-sg			scramble-sg	Capzβ-sg			scramble-sg	Capzβ-sg				ARP2-sg	-	-	+	+			ARP2-sg	-	-	+	+		X Values	A4	B4	C4	D4	E4	F4	G4	H4
	0.695	0.464			0.658	0.334			0.55	0.246					70	206	27	167				0.055906	0.098586	0.024156	0.075514		0	0	0	0	0	0	0	0	0
	0.81	0.5			0.538	0.379			0.619	0.107					149	261	61	180				0.046098	0.050993	0.230119	0.04119		0.19	-0.00471076	2.98e-05	-0.00016368	-0.0009558	-0.00326346	0.00261428	-0.00064534	0.0020111
	0.785	0.431			0.606	0.346			0.436	0.352					162	146	38	185				0.088272	0.055525	0.282245	0.073226		0.41	-0.00278946	0.00012258	0.00068159	0.0023234	-0.00597517	0.00042312	0.0006517	0.00177864
	0.751	0.463			0.657	0.311			0.334	0.215					80	213	52	205				0.033347	0.029462	0.093446	0.116704		0.61	-0.005011	-0.00497584	-0.00163173	-0.00276568	-0.00050574	-0.00097834	0.00280895	0.00193019
	0.691	0.574			0.592	0.264			0.629	0.246					64	223	87	200				0.043155	0.031729	0.518085	0.02746		0.81	-0.00591199	-0.0029025	-0.0007485	-0.00135758	-0.00407969	-0.00067838	-0.00547996	0.00318413
	0.653	0.486			0.638	0.514			0.53	0.259					102	182	58	221				0.052963	0.086121	0.787617	0.164758		1.01	-0.00125952	-0.00414225	-0.00265915	-0.00034956	-0.00391588	-0.00339582	-0.00286167	0.00202163
	0.795	0.426			0.625	0.461			0.486	0.289					51	311	66	221				0.19518	0.029462	0.556862	0.02746		1.2	-0.00191614	-0.00278496	-0.00115812	-0.0032933	-0.00474838	0.00380413	0.00237562	0.00364723
	0.781	0.485			0.613	0.423			0.6	0.205					69	340	79	229				0.032366	0.027196	0.114424	0.032036		1.4	-0.00382478	0.00209759	-0.00426286	-0.00086908	-0.00383714	-0.00152375	-0.00079085	0.00057972
	0.703	0.459			0.609	0.474			0.412	0.236					133	246	64	226				0.079445	0.028329	0.23584	0.034325		1.61	-0.00316672	-0.00355115	0.00207977	-0.00102517	-0.00346013	0.00037677	-0.00218333	-0.00110125
	0.648	0.566			0.554	0.429			0.51	0.295					74	273	93	230				0.132408	0.037395	0.539699	0.02746		1.79	-0.00292049	-0.00157862	0.0010015	0.00157457	-0.00706161	3.64e-06	0.00187269	7.31e-05
					0.578	0.388			0.409	0.253					109	178	60	240				0.040213	0.055525	0.136037	0.029748		2.01	-0.00486466	-0.00141492	-0.00162448	-0.00069231	-0.00702408	-0.00121969	0.00034028	-0.00144073
	mander's coefficient Rab5A/EEA1				mander‘s coefficient Raba/Rabaptin5				mander‘s coefficient Rab5a/Rabex5						123	373	71	127				0.120639	0.031729	0.477401	0.228831		2.2	-0.00508068	-0.0021191	0.0001915	-0.00110167	-0.00510532	0.00230488	-0.001849	-0.00131896
															155	163	68	138				0.084349	0.030596	0.054669	0.034325		2.39	-0.0025307	-0.00313709	0.00145396	0.00174494	-0.00569496	0.00201922	0.00066423	-0.00060406
	Scramble-sg	CapΖβ-sg			Scramble-sg	Capzβ-sg			Scramble-sg	Capzβ-sg					130	134	62	107				0.171641	0.026063	0.755833	0.029748		2.61	-0.00196038	-0.00261813	-0.00229701	-0.00263918	-0.00244265	0.00303514	0.00421443	0.0034021
	0.58	0.313			0.454	0.209			0.243	0.177					89	210	100	116				0.055906	0.04306	0.612803	0.025171		2.81	-0.00377845	-0.00129869	0.00034789	0.00097757	-0.0007504	0.00034844	-0.00099822	-0.00535745
	0.505	0.184			0.416	0.271			0.38	0.187					127	274	70	140				0.284433	0.052126	1.16521	0.029748		3.01	-0.00095764	-0.00148567	-0.0016998	-1.663e-05	-0.00173623	0.00188924	-0.0001043	0.00075285
	0.469	0.251			0.41	0.281			0.312	0.186					257	259	92	146				0.112792	0.063457	0.034963	0.1762		3.21	-0.00255762	0.00165895	-0.00182699	0.00091296	-0.0023689	0.00049925	0.00032038	0.00182014
	0.544	0.159			0.395	0.286			0.198	0.203					161	197	82	97				0.096119	0.045327	0.099167	0.036613		3.38	-0.00258254	-0.00468859	-0.00531144	-0.00088842	-0.00712763	-0.00292235	-0.00155485	0.0011473
	0.684	0.289			0.411	0.263			0.303	0.144					193	292	97	101				0.118677	0.063457	0.113152	0.048054		3.6	-0.00227704	-0.00264909	0.00187379	-0.00335228	-0.00403565	0.00278834	0.0016514	-0.00231413
	0.564	0.171			0.322	0.276			0.238	0.193					85	253	95	134				0.048059	0.066857	0.278431	0.141875		3.81	-0.00310695	-0.00469172	0.00083091	0.00171898	-0.00456579	0.00326805	-0.00306518	0.00220151
	0.577	0.287			0.423	0.197			0.335	0.223						230	87	127				0.044136	0.047593	0.072468	0.137299		4.01	-0.00232566	-0.00580259	-0.00216505	0.0007316	-0.00377481	0.00261828	0.00193309	-0.00323852
	0.594	0.189			0.388	0.189			0.27	0.17						203	85	144				0.084349	0.036261	0.029877	0.089244		4.21	-0.00370978	-0.00420159	-0.00105738	0.00291913	-0.00343986	0.00376693	-0.00240956	0.00217015
	0.489	0.299			0.394	0.255			0.262	0.168							85					0.080426	0.083854	0.048948	0.032036		4.4	-0.00144763	-0.00075468	0.00026565	0.00183722	-0.00481242	0.00101353	-0.0002026	0.00387383
	0.611	0.239			0.407	0.302			0.351	0.181							98					0.053944	0.041927	0.049584	0.160182		4.6	-0.00354414	-0.00011147	-7.286e-05	0.00118584	-0.00502779	0.00333452	-0.00040798	0.0032312
					0.339	0.244			0.294	0.151							75					0.052963	0.047593	0.088361	0.073226		4.8	0.00120563	0.00331421	-0.00402827	0.00146539	-0.00181816	-0.00084349	-0.00172865	-0.0024984
																						0.180468	0.186973	0.040048	0.059496		5.01	-0.00121738	-0.00230331	0.00280702	0.00622117	-0.00656102	-0.00066726	0.00588816	0.00125869
																						0.094157	0.124648	0.125231	0.096109		5.2	-0.00295871	-0.00272055	-0.00144219	0.00176848	-0.00222804	0.00017589	-0.00338597	0.00194552
																						0.030405	0.08952	0.044805	0.082379		5.41	0.00246648	-0.00078196	0.0044192	-0.00123496	-0.00227882	-0.00212375	0.00095329	-0.00264658
																						0.041194	0.080455	0.037987	0.098397		5.6	-0.00352486	-0.00120997	-0.00097472	-0.00437052	-0.00672391	0.00079341	0.00330893	0.00122057
																						0.171641	0.055525	0.038961	0.093821		5.79	-7.071e-05	-0.00113257	-0.00145822	0.00769454	-0.00492259	-0.00137338	0.00179158	0.00231077
																						0.030405	0.50426	0.043831	0.02746		6.01	-0.00127849	-0.0015764	-0.0012843	0.00038707	-0.00416885	0.00148866	-0.00168863	0.00191961
																						0.086311	0.054392	0.056494	0.075514		6.21	-0.00966544	-0.00010297	-0.0015306	0.00011585	-0.00268888	0.00227843	0.00239591	0.00434973
																						0.038251	0.087254	0.177273	0.043478		6.4	-0.00682362	-0.00078915	-0.00250017	0.0005907	-0.00148099	0.00614765	0.00050606	-0.00121623
																						0.067675	0.027196	0.06039	0.068649		6.61	-0.00305031	-0.00794297	0.00424033	-0.00072361	-0.00596182	6.751e-05	-0.0004604	0.0051304
																						0.045117	0.210769	0.031169	0.038901		6.8	0.00032093	-0.00422972	-0.00034976	0.00338619	-0.00327819	-0.0035519	0.00013077	-0.00383987
																						0.111812	0.249297	0.096429	0.540041		7	-0.00384364	-0.00415709	-0.00100618	0.00180255	-0.00142625	0.00026716	0.00191158	0.00048133
																						0.128485	0.063457	0.024351	0.068649		7.21	-0.00196053	0.00016324	-0.00177175	0.00558629	-0.00303702	-0.0005077	-5.496e-05	0.00019734
																						0.096119	0.028329	0.19578	0.212813		7.41	-0.00441019	-0.00306965	-0.00203134	0.00148486	-0.00361858	0.00098415	0.00356394	0.00133413
																						0.045117	0.033995	0.07987	0.951936		7.61	-0.00517914	-0.00323488	0.00030388	-0.00109512	-0.00024987	0.00221354	-0.00219616	0.00055935
																						0.03629	0.032862	0.041883	0.038901		7.8	-0.00501948	-0.00336938	-0.00121906	0.00195187	-0.00019467	-0.002742	0.00304193	0.00017228
																						0.038251	0.130314	0.062338	0.032036		8	-0.00305897	-0.00302737	0.0002815	-0.00014048	-0.00071204	0.00046743	6.407e-05	0.00185389
																						0.045117	0.054392	0.069156	0.02746		8.2	-0.00330379	-0.00324469	0.00183875	0.0007569	-0.00230571	-0.00320248	0.00096095	0.00018045
																						0.143197	0.041927	0.124676	0.057208		8.41	-0.00808981	0.0015414	-0.00245888	-0.00060097	-0.00320829	-0.00183794	0.00298181	0.00069814
																						0.03629	0.038528	0.048701	0.620132		8.6	-0.00552763	-0.00598758	0.00073949	0.00069	-0.00418138	-0.00044631	-4.27e-06	-0.00276465
																						0.051983	0.045327	0.028247	0.070938		8.81	-0.00090783	-0.00251637	0.00086924	0.00103701	-0.00518347	-0.00023791	0.00156701	-2.171e-05
																						0.048059	0.040794	0.033117	0.061784		9	-0.00646479	-0.00202941	-0.00071199	-0.00160775	-0.00372589	0.0009055	-0.00172534	0.00202112
																						0.046098	0.073656	0.185065	0.034325		9.19	-0.00510274	-0.00357463	0.00056119	0.00023862	-0.00417613	0.00059329	0.001214	-0.00267924
																						0.108869	0.028329	0.040909	0.054919		9.41	0.00032388	0.00037287	0.00010266	0.00169462	-0.00536193	0.00396293	0.00128913	0.00381149
																						0.089253	0.050993	0.069156	0.052631		9.61	-0.00606972	-0.00261276	-0.00454099	-0.00178993	-0.00103525	0.00179959	0.00039531	0.00023527
																						0.051002	0.078189	0.111039	0.038901		9.81	-0.00468863	-0.00205265	-6.986e-05	0.0041784	-0.005579	0.00158073	-0.00152775	0.001664
																						0.260894	0.072523	0.705196	0.04119		10	-0.00366257	-0.00343878	0.00099859	-0.00034222	-0.00195918	-0.00069134	0.00339217	0.00047747
																						0.065714	0.027196	0.037013	0.036613		10.2	-0.00246175	-0.0018303	0.00143661	-0.00095724	-0.00255048	0.00110761	-1.135e-05	0.00252026
																						0.124562	0.193772	0.392533	0.073226		10.4	-0.00316157	-0.00223136	-0.00118797	0.00143906	-0.00414615	0.00278899	0.00043661	0.00498792
																						0.051983	0.069123	1.12111	0.025171		10.61	-0.00365137	-0.00330789	0.00066788	5.948e-05	-0.00401351	-0.00109119	-0.0014713	0.0060677
																						0.051002	0.039661	0.632144	0.066361		10.8	-0.00240598	-0.00398492	-0.00146526	0.00263264	-0.00811312	0.00314761	0.00077838	0.00201646
																						0.030405	0.150711	0.028247	1.24484		11.01	-0.0013802	-0.00205901	0.00067122	-0.00098149	0.00124386	-0.00181405	-0.00071575	-0.0006475
																						0.112792	0.141646	0.037013	1.16933		11.2	-0.00224936	0.00020546	-0.00133286	-0.00013983	-0.00642402	0.00022417	0.00405377	0.00066429
																						0.089253	0.045327	0.226948	0.04119		11.4	-0.00031351	-0.00593165	-0.00530024	0.00335156	-0.00646589	-0.00058248	0.00048289	0.00193866
																						0.131428	0.038528	0.074026	0.050343		11.61	-0.00231984	-0.00177054	-0.00147038	0.00094601	-0.00123579	0.0006472	0.00187128	0.00042415
																						0.038251	0.070256	0.211364	0.059496		11.81	-0.00304406	-0.00096026	-0.00012361	0.00510664	-0.00048546	0.00211865	0.00352774	-0.00150607
																						0.118677	0.050993	0.826949	0.59496		12	-0.00520726	7.19e-05	-0.0001584	0.00324964	-0.00624948	-5.303e-05	0.00175592	0.0038925
																						0.218719	0.392076	0.033117	0.032036		12.2	-0.00679987	-0.00516659	-0.00137576	-0.00516124	0.0006122	-0.00316219	0.00148525	0.00108578
																						0.294241	0.035128	0.40617	2.05261		12.4	-0.00625391	0.00221423	-6.331e-05	-0.00309621	-0.00719548	-0.00120075	0.00144498	0.00343277
																						0.166737	0.026063	0.247403	0.192218		12.59	-0.00031887	-0.00256709	-0.00206813	-0.00050478	-0.00476624	-0.00077422	0.00167852	-0.00088954
																						0.090234	0.284425	0.171429	0.12128		12.81	-0.0007163	-0.00215247	-0.00230451	-0.00098966	-0.00220658	-0.00378004	0.00286599	0.00301776
																						0.052963	0.037395	0.63117	0.070938		13.01	-0.00169129	-0.0030468	0.00146259	0.00335235	-0.00020798	0.0027859	0.00140846	0.00192966
																						0.027462	0.054392	0.586365	0.066361		13.21	-0.00137496	0.00255353	-0.0029507	0.00200188	-0.00431806	0.00215245	0.00126439	0.00346132
																						0.096119	0.039661	0.774352	0.16247		13.4	-0.00670802	-0.00312903	-0.00198577	0.00024366	-0.00874475	-0.00173223	9.146e-05	0.00139803
																						0.027462	0.039661	0.189935	0.263155		13.6	-0.00178366	-0.00329112	7.67e-06	0.00045349	-0.00239878	-0.00087193	0.00083901	0.00228484
																						0.041194	0.13598	0.024351	0.237984		13.81	-6.187e-05	-0.0004166	0.00087415	0.00213999	-0.00309718	-0.00296533	0.00057696	0.0001323
																						0.237332	0.044194	0.346754	0.098397		14.01	-0.00554346	0.00096952	-0.00118418	0.00343227	-0.00186985	0.00030357	0.00053406	0.00280631
																						0.024812	0.206237	0.036039	0.276885		14.21	0.00012127	-0.00341178	0.00251867	0.00265569	-0.00457003	-0.00562425	5.874e-05	0.00606943
																						0.056097	0.064591	0.099351	0.393589		14.41	-0.00042536	0.00096868	-0.00306365	-0.00053435	-0.00202237	-0.00055811	0.00308923	-0.00220448
																						0.024812	0.048726	0.177273	0.105262		14.6	0.00020518	-0.0050051	0.00066504	-0.00064858	-0.00793018	0.0033977	0.00287869	0.00327513
																						0.047466	0.094053	0.356494	0.288327		14.8	-0.00477528	-0.00067533	-0.00182032	-0.00031562	-0.00371688	0.00486486	-0.00014265	0.00104262
																						0.040994	0.055525	0.19578	0.320363		15.01	-0.00366642	-0.00156247	-0.00209639	0.00071729	0.00074267	-0.00259376	0.00090245	0.00044337
																						0.127297	0.037395	0.099351	0.505716		15.21	-9.949e-05	-0.00235105	0.00035026	0.00355342	-0.00526662	-0.00288033	-0.00068168	0.00143513
																						0.093854	0.062324	0.110065	0.13501		15.4	-0.00053404	-0.00615774	0.00072396	0.0011181	-0.0041625	0.00307191	0.00023004	0.00449206
																						0.025891	0.109917	0.028247	0.185353		15.6	-0.00531077	-0.00343262	-0.00106018	-0.00048473	-0.00425314	0.00425364	0.00293541	0.00241926
																						0.069042	0.029462	0.680845	0.096109		15.8	-0.00534824	0.00142852	-0.00031847	-0.0006219	-0.00845683	-0.00414629	-0.00015826	0.00013924
																						0.046388	0.137113	0.366234	0.322652		15.99	-0.00252771	-0.00366093	0.00126693	0.00192265	-0.00217379	0.00203376	0.00211544	0.00294735
																						0.057176	0.072523	1.14156	0.029748		16.21	-0.00317446	-0.0020243	0.00056461	0.00098386	-0.00253759	-0.00164322	0.00033548	0.00631796
																						0.028048	0.049859	0.089611	2.27458		16.41	-0.00197111	-0.00532034	-0.00235365	-0.00097473	-0.00265546	0.0029909	0.00204509	0.00386611
																						0.057176	0.184706	1.39383	0.281462		16.61	-0.00545028	-0.00439598	0.00262641	0.0025776	-0.0022485	0.00047411	0.00254496	0.00156622
																						0.144557	0.047593	0.041883	0.123569		16.8	0.00048777	-0.00340421	-0.00348747	0.00051279	-0.00615004	-0.0053776	0.00105878	0.00128523
																						0.055018	0.063457	0.027273	0.089244		17	-0.00339208	0.00333365	-0.0007605	0.00368438	0.00024887	-0.00215153	0.001344	-0.00240392
																						0.043151	0.070256	0.025325	0.036613		17.21	-0.00406806	-0.00416787	6.299e-05	0.00219025	-0.00048206	-0.00328398	-0.00436653	-0.00021346
																						0.08846	0.060058	0.062338	0.054919		17.41	-0.00190193	-0.00279446	-0.00286327	-0.00425163	0.00072413	-0.00137613	-0.00111744	0.00527412
																						0.0356	0.59378	0.048707	0.086956		17.6	-0.00569321	-0.00297902	0.00412065	0.00416597	-0.00176901	-0.0037454	-7.393e-05	0.0009757
																						0.060412	0.057792	0.029765	0.04119		17.8	-0.00430835	-0.00233464	-0.00425433	0.00265654	-0.00600271	-0.00045512	-0.00143862	-0.00124952
																						0.02697	0.048726	0.051412	0.329516		18	-0.00683715	-0.00314803	-0.00308905	0.00100788	-0.00404552	0.00217538	0.0012957	0.00011584
																						0.155345	0.069123	0.156943	0.173911		18.19	-0.00400766	0.00143522	-0.00248738	0.00443141	-0.00181115	-0.00240189	0.00155605	0.00078862
																						0.037757	0.028329	0.033373	0.059496		18.41	-0.00584741	-0.00389257	-0.00195201	0.00168481	-0.00470438	0.00303364	0.00073618	0.00133863
																						0.036679	0.032862	0.229101	0.157893		18.61	-0.00542529	0.00095699	-0.00097611	-0.00015626	-0.006036	0.00086633	0.0015057	0.00436639
																						0.116509	0.035128	0.111845	0.118992		18.8	-0.0037809	-0.00366904	0.000701	0.00031761	-0.00725792	-0.00071966	0.001513	-0.00010056
																						0.038836	0.052126	0.053216	0.04119		19	-0.00489021	-0.00172095	-0.00148644	-0.00019789	-0.00300195	-0.00151697	0.00109867	-0.00036863
																						0.105721	0.175641	0.254356	0.105262		19.2	-0.00138625	-0.00026638	0.00024691	0.00146814	-0.00260629	-0.00036934	0.00124799	0.00219657
																						0.138084	0.031729	0.092001	0.096109		19.39	-0.00283758	-0.00167527	0.00014345	-0.00179975	-0.00418658	-0.00292344	-0.00129437	0.00613057
																						0.051782	0.041927	0.042393	0.180776		19.61	-0.00588944	-0.00052036	-0.00213728	-0.00207159	-0.00619796	-0.00326836	0.00352452	-9.732e-05
																						0.110036	0.033995	0.072158	0.091532		19.81	-0.00618615	-4.616e-05	-0.00110167	0.00410995	-0.0066224	-0.00217261	0.00328111	-0.00035574
																						0.063648	0.100852	0.038785	0.219678		20	-0.00252631	-0.00414645	0.00097497	0.00280685	-0.00258379	-0.00399264	-0.00138412	0.00292791
																						0.080909	0.050993	0.52585	0.02746		20.2	-0.00339499	0.00036229	-0.0009142	0.00067343	-0.00477315	0.00305255	0.00029822	-0.00172679
																						0.144557	0.437403	1.25374	0.052631		20.4	-0.00626781	-0.00417109	-0.00368224	0.00326954	0.00286221	-0.00154218	0.00148057	0.00238592
																						0.048545	0.184706	0.323808	0.141875		20.61	-0.00316756	-0.00017996	0.00309635	-0.00050424	-0.0031359	-0.00052567	0.00335047	0.00307529
																						0.030206	0.037395	1.41068	0.061784		20.81	-0.00500758	-0.00270448	0.00135937	0.00383313	-0.00506155	-0.00378468	0.00114013	0.00154849
																						0.051782	0.032862	0.028863	0.025171		21.01	-0.00263943	-0.00154317	-0.00056701	0.00013787	-0.00498442	0.00234403	0.00362354	0.00110506
																						0.073357	0.032862	0.064942	0.064073		21.2	-0.00305272	-0.00448244	-0.00047119	-0.00161625	-0.00487386	-0.00147075	-0.00082291	0.00343179
																						0.034521	0.030596	0.462712	0.114415		21.4	-0.00563506	-0.00310821	-0.00353927	0.00171632	-0.00270827	-0.0032818	8.744e-05	-0.00034906
																						0.047466	0.199438	0.036981	0.18993		21.61	-0.0077142	-0.00503592	0.00035104	0.00224284	-0.0070544	0.00037107	-0.00054098	0.00253853
																						0.056097	0.044194	0.060432	0.27002		21.81	-0.00073583	-0.00351533	0.00063744	-0.00084573	0.00111144	8.125e-05	0.00480353	0.00248907
																						0.042073	0.026063	0.054118	0.144163		22.01	-0.00946596	-0.00124089	-0.00292652	0.00267733	-0.00257741	-0.00380305	-0.00051165	0.0028456
																						0.174763	0.033995	0.079374	0.077802		22.2	-0.00394584	-0.00625969	-0.00169853	0.00101939	-0.0055585	-0.00173596	0.00044608	-0.0016014
																						0.048545	0.169975	0.12357	0.089244		22.4	-0.00251532	-0.0019612	-0.00345501	-0.00083015	-0.00432023	-0.00095814	-0.00140055	0.00262778
																						0.241648	0.094053	0.571851	0.073226		22.6	-0.0020556	-0.0042159	-0.00418812	-0.00209067	0.00071062	-0.00565915	0.00520312	-0.00124431
																						0.031285	0.048726	0.107335	0.395877		22.79	-0.0055409	-0.00230664	-0.00267184	0.00048597	-0.00628228	-0.0009146	0.00402829	-0.00096696
																						0.042073	0.041927	1.80394	0.061784		23.01	-0.00264984	-0.0012631	-0.00033225	0.00111231	0.00144557	-0.00109853	0.00280648	0.00477112
																						0.034521	0.176774	1.38272	0.350111		23.21	-3.93e-05	0.00027143	-0.00137805	-1.185e-05	-0.00579191	-0.00068524	-0.0014658	0.00172392
																						0.096012	0.197171	0.054118	0.045766		23.4	-0.00373299	-0.00368469	0.00477921	0.00260549	-0.00515744	0.00154649	0.00234796	0.00305783
																						0.213599	0.134847	0.39326	0.064073		23.6	-0.00155301	-0.00124056	-0.00343447	-0.0001305	-0.0073201	-0.00332646	0.00245643	-0.00430071
																						0.040994	0.037395	0.036079	1.27001		23.81	-0.0038211	-0.00189427	-0.00218353	0.00250525	-0.00119877	-0.00046495	-0.00032057	-0.00039812
																						0.385126	0.126915	0.542086	0.178488		24.01	-0.0037939	-0.00342224	0.00525072	0.00149243	-0.00504069	-0.00265801	6.047e-05	0.00135847
																						0.069042	0.080455	0.3202	0.057208		24.21	-0.00321901	8.598e-05	0.00074275	-0.00245976	-0.00148723	-7.533e-05	0.00246935	0.00589004
																						0.02697	0.087254	0.375221	0.43249		24.4	-0.0041212	0.00188813	3.335e-05	0.00285171	-0.00405133	-0.00118254	0.00194508	0.00643894
																						0.024812	0.036261	0.430241	1.67504		24.6	-0.00219642	-0.00044299	-7.255e-05	0.00051199	-0.00409169	-0.00235667	0.00215541	0.00429295
																						0.075515	0.190372	0.081178	0.826079		24.8	-0.00100825	-0.00239287	-0.00323486	0.00228629	-0.00077859	-0.00097561	0.00228008	0.00345335
																						0.02697	0.066857	0.055922	1.0961		24.99	-0.00489528	-0.00326484	-0.00205181	-0.00093933	-0.0054431	0.00189898	0.00258994	0.00014042
																						0.057176	0.039661	0.03395	0.105262		25.21	-0.00277499	-0.00193693	0.00355597	0.00064683	-0.00535688	-0.00035834	0.00238837	0.00207598
																						0.477901	0.087254	0.080632	0.025171		25.41	-0.00286614	-0.00083097	-0.00013525	-0.00016365	-0.00818871	-0.00033471	0.00229925	0.00129446
																						0.037757	0.028329	0.03395	0.315787		25.6	-0.0063873	-0.00174983	0.00140314	0.00346498	-0.00238222	-0.00354351	0.00044889	0.00139756
																						0.05286	0.122382	0.048804	0.050343		25.8	-0.0019652	-0.00022923	0.00017629	0.00646071	-0.00239739	-0.0004455	0.00455045	0.00311366
																						0.180157	0.035128	0.035011	0.640726		26	0.0002092	0.00055403	0.000204	0.0006705	-0.00240289	0.00112622	0.00036711	-0.00155797
																						0.1068	0.162043	0.054109	0.153317		26.21	-0.0040966	7.742e-05	-0.00158005	0.00112803	-0.00461449	7.682e-05	0.00300259	0.00143431
																						0.169369	0.057792	0.064718	0.052631		26.41	-0.00329099	-0.00113248	0.0037497	-6.998e-05	-0.00289846	-0.00324651	0.00111413	-5.125e-05
																						0.090618	0.113317	0.206886	0.800908		26.61	-0.00175452	0.00069197	0.00147757	0.00195571	-0.00346756	-0.00346589	0.00170173	0.00257704
																						0.04423	0.026063	0.115644	0.02746		26.8	-0.00538728	-0.00297726	-0.00035426	0.00149811	-0.00520753	0.00106383	0.00477352	0.00351464
																						0.122981	0.033995	0.050926	0.025171		27	-0.00372742	-0.00530104	-0.00094309	0.00188492	-0.00017238	-0.00191793	0.00563851	0.00401252
																						0.660216	0.125782	0.03395	0.224254		27.21	-0.00061105	-0.00512203	0.00130034	0.00312145	-0.00772713	-0.00280083	-0.00022386	-0.00035122
																						0.065806	0.04306	0.110339	0.029748		27.41	-0.00268976	0.00148016	0.00018321	0.00087404	0.00055775	-0.00338631	-0.00030058	0.00351431
																						0.036679	0.032862	0.068962	0.077802		27.61	-0.00430124	0.00080312	0.00105287	-0.00208897	-0.004902	-0.00036058	0.00196557	-0.0007016
																						0.04423	0.118983	0.095486	0.038901		27.81	-0.00480187	-0.00134563	0.00115782	7.011e-05	-0.00369707	-0.00230192	0.00272599	0.00252642
																						0.033442	0.054392	0.064718	0.123569		28	-0.00416058	-0.00168109	-0.00226238	-0.00047205	-0.00608104	-8.93e-06	-0.00023058	0.00562506
																						0.329029	0.254963	0.124132	0.354688		28.2	-0.00280691	-0.00432204	-0.00257474	-0.0025855	-0.00409491	-0.00418657	-0.0001006	-0.00013335
																						0.15966	0.120116	0.205825	0.105262		28.41	-0.00356557	-0.00133222	0.0030637	0.00011803	-0.00226151	0.00038926	0.00066606	0.00410851
																						0.047466	0.029462	0.217495	0.091532		28.61	-0.00382655	-0.00337439	0.00104995	0.00111492	-0.00310727	-0.00010873	-0.00019152	0.00409052
																						0.048545	0.038528	0.090181	0.080091		28.81	-0.0070192	-0.00272876	0.00018201	-0.00064491	-0.00246904	-0.00238696	0.00446734	0.00266084
																						0.469271	0.04646	1.0705	0.054919		29	-0.00569768	-0.00165467	0.00087235	-0.0005285	-0.00334389	-0.00359902	0.00382056	0.00106914
																						0.042073	0.038528	0.167631	0.080091		29.2	-0.00531859	-0.00023482	0.0007789	0.00135614	0.0007701	3.078e-05	-0.00111399	0.00216408
																						0.040994	0.026063	0.676888	0.132722		29.41	-0.00489871	-0.00069406	-0.00013168	4.221e-05	0.00025625	0.00020513	-0.00166141	0.00584094
																						0.211442	0.34335	0.70129	0.025171		29.61	-0.00537691	-0.00102921	0.00019941	0.00236375	-0.00176481	0.00137756	0.00043643	0.00193581
																						0.396992	0.079322	1.3803	0.034325		29.81	-0.00252281	-0.00070728	0.00376456	-0.00112521	-0.00355901	0.00044315	0.00203371	0.00289297
																						0.104642	0.080455	0.850884	0.045766		30.01	-0.00435201	-0.00090992	0.00202341	0.00032071	-0.00538421	-0.00190443	-0.00013482	0.00456
																						0.104642	0.04306	0.225983	0.029748		30.2	-0.00374736	-0.002778	-0.00026114	0.00310673	-0.00522555	-0.00373869	7.497e-05	0.00145635
																						0.058254	0.196038	0.349054	0.043478		30.4	-0.00238112	0.00024114	0.00116409	0.00035843	-0.00241368	0.00014351	0.00540421	0.00029758
																						0.030206	0.213036	0.059413	0.043478		30.61	-0.0066978	-0.00312105	0.00161475	-0.0004128	-0.00368023	-0.00255535	0.00580767	0.00274264
																						0.182314	0.256096	0.760703	3.29516		30.81	-0.00448339	-0.00281082	-0.00097395	0.00585418	-0.0073465	-2.473e-05	0.00159255	0.00060705
																						0.036679	0.030596	0.397857	0.258579		31.01	-0.00217709	-0.00172994	-0.00286659	0.00098617	-0.00759028	-0.0014093	0.00153452	0.00293259
																						0.162896	0.045327	0.315103	0.157893		31.2	-0.00530803	-0.00197836	0.0034895	0.00136418	-0.00640209	-0.0024732	-8.199e-05	0.00156888
																						0.182314	0.054392	0.639755	0.869557		31.4	-0.00355977	0.00014641	-0.00182073	-0.00115303	-0.00536965	-0.00234574	0.00414876	0.00302528
																						0.210363	0.026063	0.080632	0.203659		31.6	-0.00131256	-0.00144912	-0.00027388	0.00019723	-0.00331543	-0.00112599	0.00116251	-0.00053897
																						0.312847	0.027196	0.134741	0.066361		31.79	-0.00171405	-0.00207828	0.00170732	0.00180562	-0.00474063	0.00072658	0.00367064	0.0025103
																						0.171527	0.037395	0.062596	0.073226		32.01	-0.00225088	-0.00246053	0.0016671	0.00100201	-0.00415722	-0.00297793	0.00209122	0.00360946
																						0.066885	0.179041	0.20052	0.528599		32.21	-0.00238105	-0.0031991	-0.00038448	0.00128747	-0.00373885	-0.00190849	0.00489103	0.00570084
																						0.045309	0.079322	0.256751	0.075514		32.4	-0.00290442	0.00305035	-0.00082553	0.00123606	-0.00278601	0.00033222	0.00218651	-0.0005804
																						0.340896	0.249297	0.190972	0.043478		32.6	-0.00196199	-0.0033148	0.00228307	-0.00089242	-0.00475043	-0.0001343	0.00528814	0.0029924
																						0.511344	0.029462	0.057291	0.02746		32.81	-0.00059472	-0.00499821	-0.0061638	0.00139265	-0.00539322	-0.00345839	0.00553556	6.09e-06
																						0.225466	0.052126	0.550635	0.141875		33.01	-0.00392414	0.0001571	-0.00231812	0.00358458	0.00044243	0.00040215	-0.00134845	0.00351811
																						0.138084	0.031729	0.371334	0.18993		33.21	-0.00206677	-0.00111368	-0.00390915	0.00493346	-0.00603915	0.00093645	-0.00017766	0.00249605
																						0.158581	0.062324	0.039255	0.080091		33.42	-0.00363781	0.00082964	0.0019149	0.00230004	-0.0034009	-0.00106326	-0.00020886	0.00363219
																						0.073357	0.050993	0.725692	0.059496		33.6	-0.00428	-0.00146859	-0.0013883	-0.00076333	-0.00710713	-0.00313273	0.00051698	0.00514991
																						0.311769	0.266294	0.126253	0.02746		33.81	-0.00555362	-0.00276347	0.00206012	0.00257518	-0.00277716	-5.549e-05	0.0045264	0.00283587
																						0.179078	0.050993	0.93576	0.276885		34.01	-0.00691494	-0.00536482	-0.00074873	-0.00054627	-0.00275332	-0.00425185	0.00394615	0.00365518
																						0.036679	0.04646	1.60522	0.025171		34.21	-0.00499124	-0.00291484	0.0009454	0.00109473	-0.00145655	-0.00027272	0.00235566	-0.00029805
																						0.162896	0.030596	0.049865	0.025171		34.41	-0.00278052	-0.00031997	-0.00295417	-0.00160959	-0.00179092	-0.00466297	0.00298526	0.00156191
																						0.201733	0.113317	0.091242	0.102974		34.58	-0.00658242	-0.00241135	0.00110584	-0.00072338	-0.00315176	0.00130061	-0.00037935	0.00093995
																						0.024812	0.137113	0.072145	0.025171		34.8	-0.00037321	-0.00025408	-2.69e-05	-0.00074608	-0.00437707	-0.00029583	0.00075173	0.00206323
																						0.233017	0.066857	0.05517	0.048054		35.01	-0.00404806	-0.00260551	-0.00332846	0.00108477	-0.00599773	-0.00027731	0.0035678	0.00238685
																						0.056097	0.036261	0.038194	0.130434		35.21	-0.00727261	-0.0031192	-0.0008414	0.00169539	-0.00284591	-0.00014542	0.00011714	0.00341108
																						0.338738	0.112184	0.048804	0.048054		35.41	-0.00216951	-0.00484511	-0.00313018	-0.00166259	-0.00412844	-0.00030504	0.00054177	0.00457679
																						0.074436	0.181307	0.10702	0.025171		35.61	-0.00570865	0.00093166	0.00318201	-0.00134132	-0.0034566	-0.00145285	0.00046151	0.00208957
																						0.227623	0.417006	0.065729	0.02746		35.8	-0.00658123	-0.00200649	-0.00038705	-0.00012691	-0.00445073	7.425e-05	0.0051504	0.00287748
																						0.347368	0.11105	0.028651	0.544617		36	-0.00331478	3.237e-05	0.00036036	-0.00186861	0.00148178	0.00324745	0.00310887	0.00420118
																						0.856554	0.062324	0.029494	0.04119		36.21	-0.00898515	-0.00187769	0.00236268	0.0015929	-0.00399092	-0.00055356	0.00251261	0.00584964
																						0.642955	0.049859	0.339598	1.21052		36.41	-0.00475042	-0.00027862	-0.00239935	0.00136416	-0.00878352	-0.00042391	0.00123836	0.00461449
																						0.125139	0.084988	0.278082	0.064073		36.61	-0.00615911	-0.00174827	0.00104303	0.00189196	-0.00207126	-0.00491431	-0.00028446	0.00112354
																						0.047466	0.027196	0.092694	0.038901		36.8	-0.00399537	-0.00260512	-0.00110531	-0.00015982	-0.00736207	-0.00309551	0.00555861	0.00270164
																						0.43475	0.105385	0.088481	0.075514		37	-0.00617516	-0.00524143	-0.00024187	0.00258243	-0.00299916	0.0007978	0.00253456	0.00239987
																						0.317162	0.026063	0.03455	0.091532		37.21	-0.00384693	-0.00418304	0.00103086	-0.0031652	-0.00543375	-0.00116742	0.00170429	0.00515472
																						0.060412	0.028329	0.024438	0.086956		37.39	-0.00405689	-0.00320556	-0.00090617	0.00091467	-0.00099384	-0.0034155	0.00305786	0.00504219
																						0.137006	0.032862	0.278082	0.068649		37.61	-0.00277459	-0.00196542	-0.00293299	0.00177914	-0.00359901	-0.00128623	-0.00015122	0.00365898
																						0.047466	0.06799	0.043819	0.048054		37.81	-0.00916058	0.00134451	0.00054749	-0.00016142	-0.00374594	-0.00089942	0.00362336	0.00163814
																						0.131612	0.123515	0.117974	0.036613		37.99	-0.0073302	-0.00586413	0.0027882	0.00034333	-0.00568516	-0.00104248	0.00357058	-0.00045084
																						1.25355	0.106518	0.15758	0.132722		38.2	-0.00623302	-0.00046265	-0.00214417	0.00122502	7.62e-05	0.00048825	0.00287959	0.00129242
																						0.087381	0.032862	0.229207	2.48968		38.41	-0.00507867	-0.00500776	0.00189112	0.00183036	-0.00572075	1.427e-05	0.00382785	-0.00040928
																						0.658058	0.030596	0.066571	0.025171		38.59	-0.0011453	-0.0018597	-0.00038625	-0.00025449	-0.00303114	-0.00296518	0.00032816	0.00059583
																						0.030206	0.06799	0.189602	0.048054		38.81	-0.00579022	-0.00403592	-0.00175911	0.00041793	-0.00081647	-0.00214134	0.00091145	0.00486206
																						0.038836	0.06799	0.036235	0.034325		39	-0.00055938	-0.00229697	0.00116928	0.00286684	-0.00684876	-7.357e-05	0.00134338	0.00490601
																						0.812324	0.02493	0.028651	0.029748		39.19	-0.00466316	-0.00111835	0.00067606	-0.00138852	-0.00438764	-0.00115501	-0.00118996	0.00050818
																						0.24812	0.156377	0.079211	0.466815		39.4	-0.00364883	-0.00229637	0.00236596	0.00207647	-0.00410718	-0.0032271	0.00097192	0.00434344
																						0.034521	0.096319	0.026966	0.178488		39.61	-0.00057094	-0.00244093	-0.00464145	0.00336441	-0.00443858	0.00179814	0.00542217	0.0080225
																						0.049624	0.273093	0.048032	0.677339		39.81	-0.00259677	0.001543	0.0011651	0.00023935	-0.00652	-0.00445512	-0.00064324	0.0048523
																						0.032364	0.036261	0.612624	2.87412		40.01	-0.00520467	-0.00382805	-0.00083297	-0.00126334	-0.002057	-0.00654335	0.00209066	0.00584862
																						0.065806	0.087254	0.156737	0.064073		40.2	-0.00337293	-0.00425031	0.00195464	-0.00056542	-0.00470835	-1.433e-05	0.00371189	0.00592656
																						0.051782	0.04306	0.058987	0.054919		40.4	-0.00568513	0.00166584	0.00177227	0.00029865	0.00040611	-0.00300438	0.0013992	0.0038711
																						0.034521	0.04646	0.654758	0.173911		40.61	-0.00288153	0.00094846	0.00288407	0.00263419	-0.00332895	-0.00042561	0.00161955	0.00100924
																						0.190945	0.07139	0.054774	0.070938		40.81	-0.00094914	-0.00119246	0.00037945	0.0011187	-0.00134444	-0.00299115	-0.00151358	0.00797723
																						0.032364	0.058925	0.080054	0.112127		41.01	-0.00448032	-0.00010108	-0.00477144	0.00196084	-0.00564757	-0.00227733	0.00353302	0.00291014
																						0.070121	0.102429	0.088481	0.157893		41.2	-0.00334357	-0.00186895	0.00161074	-0.00265669	-0.00230932	-0.00265696	0.00024767	0.00482679
																						0.048545	0.102429	0.99604	0.059496		41.4	-0.00428784	-0.00230496	0.00300422	0.00363574	-0.00296845	0.00190883	0.00199386	0.00209346
																						0.064727	0.11429	0.036235	0.025171		41.6	-0.00416207	-0.00123528	-0.00189424	8.519e-05	-0.00037226	-0.00250313	-0.00024362	0.00493132
																						0.025891	0.031268	0.183703	0.052631		41.81	-0.00444107	-0.00489164	-0.00141653	-9.605e-05	-0.00610239	-0.00231341	0.00088001	0.00569758
																						0.032364	0.039894	1.07357	0.059496		41.99	-0.00258216	-9.291e-05	-0.00169885	0.00033783	-0.00600479	-0.00404111	0.0041095	0.00549805
																						0.127297	0.133697	1.21008	0.045766		42.21	-0.00140463	-0.00231917	-0.00101516	0.00089838	-0.00522434	0.00027056	0.00117125	0.00581326
																						0.025891	0.048519	0.043819	0.093821		42.4	-0.00390987	-0.00133847	-0.00350131	0.00133385	-0.00269259	-0.00508446	0.00438684	0.00353529
																						0.120824	0.101351	0.070785	1.82378		42.59	-0.00284568	-0.00430171	-0.00195543	0.00234964	-0.00052451	0.00177661	0.00230673	0.0062304
																						0.142399	0.071161	0.391843	0.329516		42.81	-0.00679173	-0.00075561	0.00369699	5.497e-05	-0.00406691	0.0014957	-0.00038911	0.00475134
																						0.056097	0.185451	0.203084	0.070938		43.01	-0.0003521	-0.00130117	0.00440352	0.00617444	-0.0033835	2.375e-05	0.00309339	0.00250742
																						0.039915	0.025877	0.042134	0.048054		43.21	-0.0029997	-0.0055974	-0.00264473	-4.221e-05	-0.00465479	-0.0010724	-0.00037872	0.00384682
																						0.111115	0.043128	0.035392	0.034325		43.41	-0.00355212	0.00149804	-0.00164947	0.00069918	8.68e-05	-0.00214739	-0.00169098	0.0040933
																						0.030206	0.035581	2.4446	0.068649		43.6	-0.0043488	-0.00572841	-0.0027042	0.00119044	-0.00054261	-0.00040892	0.00331978	0.0005987
																						0.075287	0.163887	0.090166	0.302057		43.8	-0.00412889	-0.0020395	0.00310443	0.00244472	-0.00476289	-0.00069027	0.00103912	0.00642349
																						0.070399	0.029111	0.069942	0.276885		44.01	-0.00627122	-0.00022697	0.00197402	-0.00021177	-0.00498937	0.00065237	0.00236272	0.00197808
																						0.279639	0.032346	0.465156	0.167047		44.19	-0.00155188	-0.0057124	0.00148088	0.00345567	-0.0040548	-0.00171616	0.00483137	0.00068418
																						0.293328	0.102429	0.087638	0.588095		44.41	-0.00255028	-0.00113152	0.00515722	-0.00147968	-0.00309562	-0.00205967	0.00183479	0.00479228
																						0.028355	0.155261	0.062358	0.036613		44.6	-0.00491851	-0.00308936	0.00390517	0.00176964	-0.00314065	0.00180026	0.00303788	0.00078086
																						0.125153	0.029111	0.027808	0.066361		44.79	-0.00639246	-0.000135	-0.00156014	-0.00110446	-0.00327116	-0.00165774	0.00381638	0.00366351
																						0.063554	0.049597	0.098593	0.375283		45.01	-0.00548371	-0.00164293	0.0011736	-0.00010591	-0.00499883	-0.00200941	0.00084429	0.00905493
																						0.029333	0.111055	0.21741	0.080091		45.21	-0.00225679	-0.00370868	0.00236135	-0.00097195	-0.00210832	-0.00588362	0.00465522	0.00648759
																						0.053777	0.058223	0.188759	0.107551		45.4	-0.00260436	-5.512e-05	0.00226675	-0.00262361	-0.00313813	-0.00269506	0.00203392	0.0017465
																						0.108531	0.05391	0.343811	0.029748		45.61	-0.00328321	-0.00432672	-0.00206785	-0.00044775	-0.00366349	-0.0029081	0.00334135	0.0028151
																						0.099731	0.028033	0.643803	0.070938		45.8	-0.00749472	-0.00199315	0.00200443	0.00191426	-0.00488745	0.00052358	0.00413324	-0.00044751
																						0.09582	0.175747	0.068257	0.084667		46	-0.00206594	-0.00197032	-0.00088541	0.0037173	-0.00486538	-0.00187331	0.00340086	0.00197022
																						0.102665	0.052832	0.065729	0.043478		46.21	-0.00532386	0.00058683	-0.00138657	-0.00125401	-0.00444392	-0.00291549	0.0045388	0.00184028
																						0.049866	0.056067	1.08874	0.086956		46.41	-0.00488845	-0.00506951	-0.00486646	-1.35e-06	-0.00394476	-0.00129726	0.00150274	0.00430245
																						0.041066	0.104586	0.733126	0.102974		46.61	-0.00425341	-0.00297055	-7.667e-05	-0.00056425	-0.00410799	0.000378	-0.00014485	0.00173456
																						0.031288	0.097038	0.235949	0.14874		46.8	-0.00544685	-0.00572584	2.376e-05	0.00255555	-0.00626626	-0.00173869	-0.00036475	0.00364055
																						0.21804	0.074396	0.103649	0.151028		47	-0.0025607	-0.00399573	-0.00046607	0.00195093	-0.00488223	0.00167602	0.0009042	0.00268613
																						0.028355	0.047441	0.093537	0.185353		47.21	-0.00513948	-0.00139504	-0.00017493	-9.811e-05	0.0009325	-0.00078978	0.00333156	0.00246207
																						0.057688	0.132619	0.407854	0.508004		47.41	0.00036028	-0.00600253	5.167e-05	0.00101092	-0.00333357	0.00101841	-0.001034	0.00217398
																						0.055732	0.058223	0.773575	0.173911		47.61	-0.00281253	-0.00405502	0.00156585	0.00453965	-0.00155078	-0.00122032	0.0045636	0.00581184
																						0.025422	0.115368	0.929469	0.080091		47.81	-0.00609121	0.00097993	0.00176158	0.00216547	-0.00280249	-0.00407673	0.00356627	0.00435576
																						0.109509	0.069005	0.176962	0.043478		48	-0.00498458	-0.00565912	9.25e-06	0.00167893	-0.00066774	0.00111745	0.00315935	0.0049855
																						0.189685	0.079787	0.083425	0.572077		48.2	-0.00711836	0.00107407	0.00064189	0.00210309	-0.00634078	-0.00031425	-0.00121135	0.00469089
																						0.073332	0.026955	0.044662	0.084667		48.41	-0.00619292	-0.00125422	0.00424577	-0.00099889	-0.00286897	-0.00584551	0.0008294	0.00252823
																						0.025422	0.201624	0.084267	0.052631		48.61	-0.00550643	-0.0038349	0.00106323	0.00214823	-0.00294582	0.00036078	0.00307172	0.00654908
																						0.042044	0.066849	0.680038	0.057208		48.8	-0.00260263	-0.0043386	0.00011035	0.0006248	-0.00279407	-0.00109843	0.0065072	0.00180637
																						0.087998	0.313757	0.061515	0.059496		49.01	-0.00039403	-0.00278502	-0.00200115	-0.00107638	-0.0039348	-0.00129399	0.0057214	0.00266933
																						0.284528	0.254456	0.101964	0.082379		49.2	-0.00599052	0.00075187	0.00233996	0.00252585	-0.00104552	0.00073486	0.00323646	0.00135814
																						0.077243	0.231814	0.916829	0.052631		49.39	-0.00330782	-0.00446062	-0.00234211	-0.00232312	-0.00433025	5.883e-05	0.00316822	-0.00023656
																						0.053777	0.024799	0.055616	0.084667		49.61	-0.00595369	-0.00410239	-0.00146421	0.00330573	-0.00127712	-0.00307058	0.00293104	0.0086023
																						0.0264	0.112133	0.11039	0.050343		49.81	-0.00653158	-0.00025215	0.0015645	0.00073009	-0.00521719	0.00195404	-0.00011208	0.00336659
																						0.278662	0.256612	0.780316	0.544617		50.01	-0.00294195	-0.00175543	0.00253518	-0.00136925	-0.00386344	-0.0005279	0.00276178	0.00407152
																						0.059643	0.133697	0.101964	0.054919		50.2	-0.00606923	-0.00326573	-0.00145827	0.0014609	-0.00800033	-0.001616	0.00119242	0.00330478
																						0.035199	0.325617	0.332014	0.034325		50.39	-0.00300878	-0.00226463	-0.00026101	-6.28e-05	-0.00609578	-0.00311126	0.0038135	0.00304308
																						0.09582	0.131541	0.069942	0.036613		50.59	-0.00502677	-0.00410775	-0.00157489	-0.00053548	0.0013895	-0.00120078	0.00353457	0.00060949
																						0.031288	0.067927	0.074998	0.050343		50.81	-0.00343889	-0.00189344	-0.00053891	-0.00268626	-0.00329267	-0.00201048	0.00332561	0.00568444
																						0.032266	0.056067	0.117974	0.038901		51	-0.00412772	0.00046814	-0.00274785	-0.00065127	-0.00846478	-0.0030722	0.00016262	0.00370969
																						0.067465	0.051754	0.246903	0.066361		51.21	-0.00737121	-0.00161392	-0.00161589	-0.00057332	-0.00565263	-0.00188647	0.00385406	0.00362225
																						0.154486	0.043128	0.029494	0.118992		51.4	-0.00490911	-0.00054283	0.00242095	0.00072095	-0.00667164	-0.00218306	-0.00088846	0.00475832
																						0.415548	0.044206	0.040448	0.048054		51.59	-0.00094484	-0.00165159	-0.00153876	-0.0009358	2.871e-05	-0.00287622	0.00204576	0.00257945
																						0.094843	0.040972	0.233421	0.704799		51.81	-0.00172211	-0.00112665	7.76e-06	-0.00038969	-0.00093462	-0.00093899	0.00129593	0.00131929
																						0.027377	0.070083	0.173591	0.080091		52.01	-0.00392523	0.00034648	8.163e-05	-0.00074082	-0.00756253	-0.0032658	0.00103607	0.000964
																						0.120264	0.132619	0.232578	0.048054		52.21	-0.00497529	0.00030133	0.00318377	0.00134621	-0.00371624	-0.00121348	0.00381466	0.0056049
																						0.101687	0.026955	0.149153	0.41876		52.4	-0.00221515	-0.00219074	-0.00045043	0.00072293	-0.00393084	0.00101152	0.00131335	0.00279677
																						0.166219	0.057145	0.153367	0.061784		52.6	-0.0084206	-0.00238305	-0.0003848	-0.00143814	-0.00562351	0.00051307	0.00179809	0.00410638
																						0.049866	0.04205	0.043819	0.464527		52.81	-0.00346401	-0.00213845	-0.0014773	-0.00211098	-0.00149584	-0.00310205	1.874e-05	0.00364288
																						0.153508	0.025877	0.050792	0.080091		53.01	-0.00388947	0.00063099	-0.00336733	0.00346597	0.00054689	-0.0027282	0.00609254	-4.001e-05
																						0.303106	0.363354	0.027512	0.1762		53.21	-0.00392722	-0.00273558	0.00140416	0.00285892	-0.00366508	0.00284165	0.00236292	0.00176616
																						0.081154	0.13801	0.057847	0.308922		53.41	-0.00864609	-0.00119517	0.00133987	0.00604108	-0.00454005	-0.00077792	0.00391304	8.484e-05
																						0.062577	0.152027	0.22151	0.125857		53.6	-0.00293352	-0.00130195	-0.00285651	0.00023366	-0.00129724	-0.00096187	6.907e-05	0.00168555
																						0.125153	0.035581	0.582698	0.14874		53.8	-0.00474216	0.00131548	-0.0039986	0.00425071	-0.00499528	-0.00204346	-0.00051532	0.00328822
																						0.038133	0.247987	0.441609	0.100686		54.01	-0.00507468	-0.0029072	0.00182829	0.00079824	-0.00031871	-0.00173199	0.00196505	-0.00018676
																						0.129064	0.060379	0.027512	0.141875		54.21	-0.00761169	-0.0011162	0.00083025	-0.00060196	-0.00337929	-0.00540382	0.00519378	0.00494315
																						0.079199	0.038815	0.027512	0.036613		54.41	-0.00830091	-0.00025474	-0.00266535	0.00259452	-0.00371152	-0.00388699	0.00402626	0.00243294
																						0.288439	0.148792	0.100173	0.320363		54.6	-0.00394084	-0.00229913	0.00120296	0.00139428	-0.00093166	-0.00125234	0.00258676	0.00329488
																						0.042044	0.067927	1.45674	0.155605		54.8	-0.0028477	-0.00277984	-0.00064568	0.00129117	-0.00984675	-0.00497228	0.00294527	0.00285398
																						0.108531	0.085178	0.720966	0.105262		55.01	-0.00351838	-0.00203506	-0.00022926	0.00045411	-0.00154223	-0.00135489	0.00434175	0.00847823
																						0.082132	0.079787	0.023985	0.137299		55.21	7.747e-05	-0.00346766	-0.0005876	0.00326961	-0.00188865	-0.00188823	0.00536482	0.00103552
																						0.0264	0.244752	0.147438	0.052631		55.41	-0.00356469	-0.00230744	0.00163105	-0.0020417	-0.00260944	-0.00300123	0.00145973	0.00590237
																						0.030311	0.057145	0.07901	0.059496		55.6	-0.00516853	-0.00284705	0.00224934	0.0011001	-0.0082413	-0.00271483	0.00338879	0.00390085
																						0.052799	0.025877	0.201052	0.084667		55.8	-0.00384327	-0.00318661	0.00113056	0.00035515	-0.00413403	-0.00165114	0.00245578	0.00183075
																						0.06551	0.03019	0.320272	0.04119		56	-0.00088798	-0.00157394	-0.00320365	-0.00124789	-0.00546906	0.00014515	-0.00075687	0.00640965
																						0.245418	0.031268	0.294171	0.025171		56.19	-0.00733651	-0.00087587	0.00171844	0.00147022	-0.00725095	-0.00432021	-0.00014244	0.00254718
																						0.14862	0.052832	0.161547	0.105262		56.41	-0.00771896	-0.00400676	0.00204003	-0.00221173	-0.00985934	-0.00205356	0.00089007	0.00617497
																						0.931805	0.035581	0.023985	0.025171		56.61	-0.00227105	-0.00548045	0.00024303	0.00068381	-0.00169947	-0.00619624	0.00510997	0.00583581
																						0.126131	0.044206	0.281473	0.025171		56.8	-0.00260448	-0.00476208	-0.0015293	0.00067523	-0.00100556	-0.00574513	0.00108216	0.00459581
																						0.324616	0.036659	0.143206	0.105262		57	-0.00337954	-0.00074985	-0.00046279	0.00232987	-0.00411145	-0.00451289	0.0034671	0.00143157
																						0.037155	0.092725	0.065606	0.180776		57.2	-0.00718271	-0.00075412	0.00193653	-0.00059003	-0.00523172	-0.00103621	0.00132175	0.00318457
																						0.073332	0.060379	1.51671	0.045766		57.41	-0.0053216	-0.0030745	-9.804e-05	-0.00118877	-0.00102672	-0.00080724	0.00462172	0.00377336
																						0.03911	0.098116	0.037389	0.02746		57.61	-0.00334037	0.00127763	0.00427901	0.00526964	-0.0047394	0.00051676	0.00651648	0.0025235
																						0.499635	0.029111	0.16578	0.038901		57.8	-0.00441826	-0.00170678	-0.00172984	0.00145841	-0.00635843	0.00292047	0.00090649	0.00353987
																						0.093865	0.16173	0.104406	0.032036		58	-0.00481045	-0.00275839	0.00272146	-0.00183826	-0.00375286	-0.00390305	0.00188217	0.00513027
																						0.066488	0.026955	0.088181	0.201371		58.2	-0.00547528	-0.00198416	-0.0018806	0.00073479	-0.002168	-0.00136369	0.00592687	0.00480513
																						0.06551	0.207015	0.095235	0.089244		58.41	-0.0052977	-0.00281181	-0.00187156	-4.21e-06	-0.00420872	-0.00665549	-0.00029543	0.00566387
																						0.598389	0.075474	1.2818	0.089244		58.61	-0.00163893	-0.00300052	0.00075996	0.00222645	-0.00258879	0.00149091	0.00223983	0.00309764
																						0.034222	0.101351	0.131918	0.054919		58.81	-0.00887954	-0.00186456	0.00190631	0.00468086	-0.00089133	0.00119493	0.0010632	0.00208227
																						0.21804	0.120759	0.101584	0.02746		59.01	-0.00292014	0.00057908	0.00422275	0.00293217	-0.00237984	-0.00275106	-0.00023103	0.0051034
																						0.0264	0.062536	0.07125	0.032036		59.2	-0.00268511	-0.00284647	0.00109624	-0.00142286	-0.00315845	-0.00396234	5.14e-06	0.00498973
																						0.135909	0.079787	0.07901	0.045766		59.4	-0.00457486	-0.0006574	0.00156801	-0.00119619	-0.00321126	-0.00327829	0.00360781	0.00579175
																						0.476169	0.079787	0.426795	0.077802		59.61	-0.00464104	-0.00229047	0.0018504	-0.00015964	-0.00328157	-0.00083345	0.00312332	0.00213103
																						0.188708	0.035581	0.0388	0.109839		59.81	-0.00935101	0.00106686	-0.00156856	0.00081197	-0.00624603	-0.00386246	-0.00014368	0.00246153
																						0.701054	0.133697	0.53755	0.032036		60	-0.00717937	-0.00038252	-0.00048174	0.00334137	-0.00508113	-0.0016303	0.00272464	0.00367814
																						0.027377	0.047441	0.775285	0.057208		60.2	-0.00395964	-0.00041692	0.00020121	-0.00021911	-0.00418549	-0.00205227	0.00456051	0.00361601
																						0.175019	0.049597	0.04797	0.043478		60.4	-0.00581188	-0.00372987	0.00182487	0.00089227	-0.00756699	-0.00101828	0.00224906	0.00064645
																						0.149597	0.034502	0.075483	0.091532		60.6	-0.00238023	-0.00021495	-0.00091337	-8.478e-05	0.00294279	4.984e-05	0.00101941	0.00103462
																						0.0264	0.075474	0.057141	0.032036		60.81	-0.00253575	-0.00170728	-0.00151038	0.0017874	-0.00118784	-0.00329771	-0.00092958	0.00078074
																						0.048888	0.133697	0.243379	0.029748		61.01	-0.00508148	0.00080835	6.956e-05	0.00042409	-0.00349037	0.00068002	0.0016755	0.00497157
																						0.127109	0.036659	0.05573	0.02746		61.21	-0.00874249	-0.0018562	0.00109629	0.00193945	-0.00318552	0.0020517	-0.00023175	0.0045729
																						0.034222	0.19192	0.41198	0.036613		61.4	-0.0046285	-0.00229155	0.00080451	0.00084195	-0.00704553	-0.00288066	0.00428151	0.00304897
																						0.045955	0.192998	0.059257	0.068649		61.6	-0.00568205	-0.00172792	-0.00176029	-0.00083692	-0.00294139	-0.00349689	0.00259365	0.00860139
																						0.167197	0.039894	0.122042	0.073226		61.81	-0.00123038	-0.00097862	-0.00032059	0.00179951	-0.00139118	-0.00252965	0.00191409	0.00078103
																						0.057688	0.362276	0.077599	0.086956		62.01	-0.00341064	-0.00330546	-0.00229276	-0.00026614	-0.00768812	-0.00454121	-0.00020586	0.00491838
																						0.180886	0.074396	0.074777	0.02746		62.21	-0.00418727	-0.00207443	0.00043431	0.00019112	0.00094328	-0.00318901	-0.00103423	0.00422829
																						0.156442	0.048519	0.059963	0.116704		62.4	-0.00218157	-0.0004908	0.00176577	-7.612e-05	-0.00248805	-0.00124298	0.00011885	0.00306391
																						0.117331	0.445298	0.028923	0.02746		62.6	-0.00160811	-0.0017644	-0.00041573	0.00032767	-0.00473141	-0.0025105	-0.00021504	0.0038225
																						0.183819	0.054988	0.125569	0.093821		62.81	-0.0054877	-0.00359151	-0.00207874	0.00133794	-0.00435886	-0.00326127	0.00748699	0.00286933
																						0.041066	0.06577	0.045854	0.073226		63.01	-0.00134388	-0.00145387	-0.0009622	0.00150221	-0.00374506	-0.00204763	0.00315118	0.0058154
																						0.094843	0.025877	0.088886	0.029748		63.21	-0.00468179	-0.00529364	-0.00032124	0.00208693	-0.00523841	-0.00236391	0.00055873	0.00410857
																						0.166219	0.196233	0.056436	0.034325		63.4	-0.00289864	-0.00098938	0.00104543	-0.00220738	-0.00540115	-0.00027402	0.00376685	0.00442666
																						0.093865	0.076552	0.04021	0.025171		63.6	-0.00196062	-0.00321398	-0.0004688	-0.0012378	-0.00570755	0.00038509	0.00378675	0.00386224
																						0.062577	0.502442	0.038094	0.043478		63.8	-0.0058474	-0.00275695	0.00163625	-0.00061272	-0.00504393	-0.00676389	0.00292228	0.00709314
																						0.034222	0.049597	0.050087	0.066361		63.99	-0.00239536	-0.00420838	0.00047384	0.00205848	-0.00399129	-0.00159787	0.00213815	0.00413359
																						0.691276	0.209171	0.041621	0.034325		64.19	-0.00737335	0.00054867	-0.00165773	0.00168912	-0.00210885	-0.00483545	0.00243648	0.00358311
																						0.073332	0.058223	0.026101	0.038901		64.41	-0.00662175	-0.00136197	-0.00180718	-0.0006672	-0.00630057	-0.00263709	0.00021414	0.00510198
																						0.051821	0.067927	0.071736	0.066361		64.6	-0.0071835	-0.00214372	-9.052e-05	2.288e-05	-0.00241977	-0.00286907	0.00200605	0.0043451
																						0.035199	0.074396	0.034759	0.036613		64.8	-0.00231696	-0.00257269	0.00179916	0.00032303	-0.0037724	-0.0057484	0.003086	0.00396527
																						0.152531	0.038815	0.075434	0.04119		65	-0.00584092	-0.00214204	-0.00167225	0.00304829	-0.00282822	-0.00268677	-0.00083667	0.00124259
																						0.227818	0.115368	0.064341	0.068649		65.21	-0.00592522	-0.00034212	-0.00252093	0.00320688	-0.00726672	-0.00291277	0.00117099	0.00778093
																						0.072354	0.059301	0.042154	0.054919		65.41	-0.00619857	0.00067134	-0.00017128	2.021e-05	-0.00150473	-0.00589055	0.00012613	0.00623225
																						0.043021	0.071161	0.340931	0.082379		65.61	-0.00398136	-0.00173628	-0.0008625	0.00189745	-0.00545047	-0.00198669	0.00150118	0.00501951
																						0.10462	0.031268	1.43842	0.045766		65.8	-0.00346072	-0.00215386	0.00557866	-0.00067142	-0.0033121	-0.00469584	0.00157019	0.00159992
																						0.044977	0.056067	0.061382	0.045766		66	-0.00638421	-0.00417069	-0.00072713	0.00152019	0.00048331	0.00138822	0.00191945	0.00635733
																						0.068443	0.048519	0.246269	0.025171		66.21	-0.00483424	-0.00052035	-0.00341487	-0.00063784	-0.00020837	-0.00075631	0.00391244	0.00354464
																						0.07431	0.092725	0.641187	0.073226		66.41	-0.00182146	-0.00551469	0.00314254	0.00258377	-0.00122725	0.00074775	0.0023547	0.00087873
																						0.171108	0.039894	0.333536	0.02746		66.61	-0.00401681	-0.00409293	0.002396	-0.00236192	-0.00311422	-0.00065522	0.00245055	-0.00101523
																						0.118309	0.147714	0.435593	0.025171		66.81	-0.0026343	-0.00270708	0.00249736	-3.725e-05	-0.00416877	-0.00359555	0.00323848	0.00210311
																						0.071376	0.146636	0.828293	0.073226		67	-0.00456526	1.51e-06	0.00079808	0.00201492	-0.00347752	-0.00303857	0.00227239	0.00503599
																						0.376437	0.169278	1.09527	0.068649		67.2	-0.00430347	-0.00285962	-0.000325	0.001361	-0.00557403	-0.00435223	0.00226967	0.00171523
																						0.034222	0.058223	0.085048	0.038901		67.41	-0.00682462	-0.00583312	7.3e-06	-0.00303887	-0.00430108	-0.00370291	-6.445e-05	0.00666531
																						0.043999	0.080865	0.224083	0.029748		67.61	-0.00497558	0.0002952	0.00047728	0.0002014	-0.00268441	-0.00276063	0.00207971	0.00033552
																						0.121242	0.159574	0.062122	0.034325		67.81	-0.004222	-0.00385061	-0.00161494	-0.00052824	-0.0041395	-0.0029808	0.00099492	0.00141136
																						0.043999	0.04205	0.052508	0.029748		68.01	-0.00196414	-0.00179726	-0.00161223	0.00232771	-0.0057411	0.00112043	0.00151237	0.00475353
																						0.062577	0.16173	0.045852	0.096109		68.2	-0.00185934	-0.00319857	0.00525644	0.00349084	6.815e-05	-4.981e-05	0.00326466	0.00564069
																						0.12222	0.175747	0.235916	0.091532		68.4	-0.00101308	-0.0025959	-0.00016683	-0.0012677	-0.00387996	0.00149871	0.00412939	0.00596515
																						0.079199	0.136932	1.60038	0.070938		68.61	-0.00626029	-0.00759141	0.00304855	-0.00198684	-0.00335415	-0.00177727	0.00140584	0.00214312
																						0.115376	0.130463	0.079871	0.057208		68.81	-0.00282932	-0.00237783	0.00151232	-0.00171012	-0.00334223	-0.00377166	0.00299925	0.00401465
																						0.041066	0.043128	0.070997	0.029748		69.01	-0.00850339	-0.00207499	-0.00084358	0.00216307	-0.002565	-0.00294655	0.00243591	0.00354628
																						0.076265	0.650156	0.095402	0.185353		69.2	-0.00506594	-0.00013269	-0.00118625	3.946e-05	-0.00152925	-0.00679352	0.00178952	0.00382403
																						0.04791	0.199468	0.069517	0.038998		69.4	-0.00015251	-0.00080726	-0.00036241	0.00230977	-0.00192892	-0.00026242	-0.00116876	0.00262914
																						0.092887	0.024799	0.57167	0.054119		69.61	-0.00275774	-0.00379137	0.00274348	0.00270681	-0.00224165	-0.00217205	-0.00162688	0.00489316
																						0.060621	0.025877	0.313568	0.071628		69.81	-0.0100414	-0.00022506	-0.00042676	0.00077694	-0.00661516	-0.0007699	0.00496478	0.00666032
																						0.140797	0.174669	1.13373	0.031039		70.01	-0.0112613	-0.00154912	0.00017819	0.00544282	-0.00413282	-0.0031536	0.00134834	0.00350284
																						0.09582	0.125072	0.082829	0.048548		70.21	-0.00197038	-0.00271862	0.0033194	0.00182302	-0.00464332	-0.00041807	0.00061207	0.00398159
																						0.159375	0.034502	0.511027	0.027855		70.4	-0.00668128	0.00040805	0.00043245	-0.00392043	-0.00016831	-0.00330193	0.00332987	0.00498796
																						0.066488	0.086256	0.034759	0.041385		70.61	-0.0044407	-0.00382099	-0.00518428	-0.00206272	-0.00315862	-0.00043064	0.00581275	0.0037853
																						0.027377	0.147714	0.168617	0.067649		70.81	-0.00226345	-0.00230404	-0.00088513	0.00176688	-0.00486199	-0.00467247	0.00169531	0.00469857
																						0.029333	0.038815	0.102058	0.027855		71.01	-0.00290813	-0.00367124	0.0009771	0.00017067	-0.00698954	-0.00224305	0.00383023	0.00495536
																						0.043021	0.132619	0.219646	0.050936		71.21	-0.00090581	0.00093624	0.00125827	-0.00094756	-0.00620524	-0.00360652	0.00494507	0.00306672
																						0.030311	0.106742	0.400835	0.08675		71.4	-0.00857598	-0.00396635	-0.00084293	0.0002325	-0.0038504	-0.00203575	-0.00150492	0.00669606
																						0.079199	0.025877	0.218166	0.044569		71.6	-0.00535479	-0.00239531	-0.0020584	-0.0012054	-0.00573074	-0.00307504	0.00680982	0.00436147
																						0.174041	0.067927	0.119807	0.038998		71.81	-0.00511081	-0.00290313	0.00356883	0.00088854	-0.00322868	-0.00525746	0.0063618	0.00314781
																						0.038133	0.0841	0.352025	0.030243		72.01	-0.00510575	0.00199587	0.00185044	-0.00120521	-0.00257282	0.00072818	0.00396953	0.00404085
																						0.142753	0.073318	0.045852	0.07322		72.21	-0.0067833	-0.00138785	-0.0001203	0.00091602	-0.00650027	-0.00265235	0.00302489	0.00520298
																						0.082132	0.051754	0.056206	0.025468		72.41	-0.00589399	-0.00288079	0.00365091	0.00207926	-0.00736054	-0.00049518	0.00044417	0.00257586
																						0.080176	0.092725	0.479227	0.10585		72.6	-0.00678006	-0.00449291	0.00063292	0.00017516	-0.00504502	-0.00314057	0.00321375	0.00244446
																						0.256173	0.047441	0.122025	0.028651		72.8	-0.00230691	-0.00247573	0.00274929	-0.00252552	-0.00287531	-0.00329776	0.00133217	0.0067895
																						0.333416	0.059301	0.357201	0.064465		73.01	-0.00331751	-0.00189663	0.0005901	0.00350476	-0.00202558	-0.00177718	4.182e-05	0.00100901
																						0.070399	0.071161	0.103537	0.033426		73.21	-0.00969645	0.00059946	0.00057754	-4.675e-05	-0.0015816	-0.00099278	0.00291025	0.00556511
																						0.072354	0.029111	0.398616	0.062078		73.41	-0.00892534	-0.00458205	0.00179211	0.00335842	-0.00244813	-0.00178465	0.00147647	0.00488235
																						0.123198	0.045285	0.296558	0.048548		73.6	-0.00815524	-0.00396611	-0.00259223	0.00231066	-0.00327528	-0.00352628	0.00161237	0.00426336
																						0.13102	0.088413	0.094662	0.144848		73.8	-0.00114842	-0.00202731	-0.00025506	0.00108829	-0.00411058	7.167e-05	0.003957	0.00402166
																						0.102665	0.032346	0.030321	0.062874		74	-0.00550432	-0.00597561	0.00210297	0.00180856	-0.00233402	-0.00321149	0.00187319	0.00363525
																						0.123198	0.080865	0.139774	0.114605		74.21	-0.00212284	-0.00151289	-0.00035732	-0.00096766	-0.00278283	-0.00241473	0.00476978	0.00113489
																						0.072354	0.087334	0.11463	0.055711		74.41	-0.0052292	0.00073481	-0.00268653	0.00052754	-0.00342905	-0.0026633	0.00243029	8.716e-05
																						0.062577	0.091647	0.096141	0.052527		74.61	-0.00281151	-0.00316364	0.0005751	0.00197585	-0.0060629	-0.00141328	-0.0014059	0.00117781
																						0.322661	0.052832	0.052508	0.024672		74.79	-0.00688909	-0.00287809	-0.00059485	0.00078126	-0.00591845	-0.00040615	0.00481182	0.00808607
																						0.222929	0.105664	0.028842	0.066853		75	-0.00329922	0.00208214	-0.00148403	0.00160543	-0.00235828	-0.00045029	0.00199421	0.00393597
																						0.030311	0.155261	0.053987	0.049344		75.21	-0.00741362	0.00068029	-0.00386107	0.00270724	-0.00232432	-0.00626274	0.00282953	0.00223186
																						0.11342	0.054988	0.055466	0.031835		75.39	-0.00604403	-0.00170326	-0.00372419	0.00042536	-0.00391052	-0.00416379	0.00261919	0.00508266
																						0.150575	0.048519	0.055466	0.041385		75.61	-0.00182458	-0.00283749	-0.00065951	0.00297059	-0.00267913	-0.00527487	0.00059697	0.00462014
																						0.030311	0.081943	0.053987	0.043773		75.8	-0.00690923	-0.00274533	0.00145664	0.00123112	-0.00434902	-0.00304857	0.00288661	0.00704803
																						0.060621	0.089491	0.122765	0.089933		75.99	-0.00642198	-0.00303376	-0.00147442	0.00296341	-0.00297735	-0.00345223	0.00180564	0.00232863
																						0.12565	0.106742	0.093183	0.028651		76.21	-0.00562034	0.00111903	0.00151199	0.00121164	-3.933e-05	-0.00408928	0.00230557	0.00663492
																						0.083766	0.05391	0.085048	0.035018		76.41	-0.00505201	-0.00402639	-0.00031159	0.00297857	-0.00557465	-0.00583756	0.00262413	0.00193606
																						0.097403	0.217797	0.041415	0.042977		76.61	-0.00201345	0.00127113	0.00171162	-0.00127153	-0.00703361	0.00064893	0.0038973	0.00347803
																						0.068182	0.235048	0.031801	0.043773		76.81	-0.00576222	0.00028957	0.0004394	0.00194306	-0.00600837	-0.00605247	0.00213843	0.004683
																						0.171429	0.187607	0.059903	0.055711		77	-0.00659101	-0.00484555	-0.00184534	0.00092576	-0.00743422	-0.00108602	-0.00077441	0.00206644
																						0.030195	0.038815	0.052508	0.089933		77.2	-0.00330271	-0.00100242	-0.00057291	-0.00138556	-0.00504448	-0.00464111	-0.00408731	0.00863639
																						0.281494	0.034502	0.042154	0.143256		77.41	-0.00200876	-0.00222605	0.00079088	0.00119981	-0.00120136	-0.00014243	0.00087235	0.00700511
																						0.274676	0.051754	0.191543	0.058098		77.61	-0.00691492	0.00075481	0.00205933	1.302e-05	-0.00351388	0.00034782	0.00276374	0.00153028
																						0.176299	0.128306	0.096148	0.04616		77.81	-0.00086469	-0.00687861	0.00329932	0.00015567	-0.00630239	4.304e-05	0.00722227	0.00444342
																						0.234741	0.131541	0.110133	0.112217		78	-0.00765873	-0.00422446	0.00186608	-5.793e-05	-0.00271542	-0.00546229	0.00124781	0.00125328
																						0.058442	0.032346	0.040207	0.134502		78.2	-0.00064365	-0.00220645	0.00284738	0.00070176	-0.00344947	-0.0025129	-0.00218662	0.00219603
																						0.468507	0.024799	0.056815	0.066853		78.4	-0.0026904	-0.00604808	-0.00140601	0.00010718	-0.00279273	-0.00186845	0.00043554	0.00931991
																						0.748053	0.044206	0.044578	0.075607		78.61	-0.00345464	-0.00039859	-0.00312499	0.00081119	-0.00287865	-0.00419061	0.00133135	0.00407206
																						0.180195	0.036659	0.027096	0.068445		78.81	0.00312635	-0.00221847	0.00247832	0.00093113	-0.00376884	-0.00070783	0.00706825	0.00467031
																						0.20552	0.043128	0.0472	0.384404		79.01	-0.00342476	-0.00314238	-0.00558082	-0.00086734	-0.00243433	-0.00045638	0.00413641	0.00776762
																						0.318507	0.044206	0.04283	0.205334		79.2	-0.00395678	-0.00036043	0.0008723	0.00026507	-0.00372907	-0.00714812	0.00165516	0.00681513
																						0.115909	0.070083	0.041082	0.43534		79.4	-0.0035382	-0.00194266	-0.0034128	0.0020738	-0.00277498	0.00053537	0.00556698	0.00138187
																						0.082792	0.036659	0.069926	0.048548		79.61	-0.00172834	-0.00218018	-0.00233532	0.00253905	-0.00345197	-0.00189668	0.00353799	0.00496393
																						0.050649	0.024799	0.076044	0.081974		79.81	-0.00422337	-0.00180796	-0.0013215	0.00042658	-0.00310321	-0.00689562	0.00834303	0.00383934
																						0.036039	0.112133	0.0472	0.108238		80.01	-0.00438782	-0.00314225	-0.00079094	-0.00198936	-0.00695953	0.0023641	0.00243663	0.00549545
																						0.142208	0.155261	0.026222	0.31596		80.2	-0.00214614	-0.00292507	9.181e-05	0.00350191	-0.00511103	-0.00584524	0.00213207	0.00127996
																						0.20065	0.03019	0.213274	0.033426		80.4	-0.00353731	-0.00236224	0.00014923	0.00182764	-0.00294337	-0.00684407	0.00137326	0.00522869
																						0.041883	0.052832	0.034963	0.037406		80.6	-0.00288755	-0.00049757	0.00042064	0.00265439	-0.00396402	-0.00477322	0.00456898	0.00611134
																						0.074026	0.034502	0.106637	0.037406		80.81	-0.00346084	-0.00414656	0.005119	0.00154871	-0.0040798	-0.00123094	0.00316637	0.00435501
																						0.061364	0.054988	0.028844	0.031835		81.01	-0.0042864	-0.0041635	0.00314592	-0.00338013	-0.00753317	-0.00052101	0.00387945	0.00311808
																						0.518183	0.036659	0.246489	0.08675		81.21	-0.00532587	-0.00550463	-0.00095659	0.00283785	-0.00629639	-0.00342059	0.00394853	0.0037941
																						0.138312	0.06577	0.233378	0.031835		81.4	-0.00384607	-0.0041465	0.00017267	0.00144298	-0.00389438	-0.00242994	0.00152231	0.00533934
																						0.095455	0.12615	0.045452	0.366895		81.6	-0.00642231	-0.00364117	-0.00093044	0.00089668	0.00219553	-0.00280509	0.00230014	0.00552049
																						0.161689	0.033424	0.878445	0.335856		81.81	-0.00445939	8.73e-06	0.0008438	5.473e-05	-0.00428672	-0.00371092	0.00064313	0.00372537
																						0.063312	0.069005	0.074296	0.042181		82.01	-0.00660692	-0.00270566	0.00095888	-0.0029026	-0.00630649	-0.00215538	-0.0002897	0.00603432
																						0.366234	0.099195	0.579512	0.08675		82.19	-0.00759899	-0.00294074	-0.00037542	-0.00128499	-0.00542289	-0.00635425	0.00098494	0.00145399
																						0.467533	0.283567	0.039333	0.139277		82.41	-0.00354192	-0.00191972	0.00081002	0.00013412	-0.00341068	-0.00241908	0.00095209	0.00579841
																						0.107143	0.25769	0.388089	0.065261		82.6	-0.00387006	-0.00141148	0.00260172	-0.00162142	-0.00503863	-0.00297211	0.00030746	0.00431833
																						0.037987	0.0841	1.95268	0.070832		82.79	-0.00524522	-0.00130993	0.00193399	0.00318341	-0.00166538	0.00044593	0.00587859	0.00511103
																						0.045779	0.090569	0.611852	0.097096		83.01	-0.00544266	-0.00107045	-0.00048497	-0.0011023	-0.00262984	-0.00217832	0.00635144	0.00347541
																						0.036039	0.089491	0.313793	0.05969		83.21	-0.00243114	0.00073663	0.00330246	-0.00116419	-0.00334095	-0.00076508	0.00513609	0.0036135
																						0.06039	0.132619	0.715867	0.299246		83.41	-0.00417022	-3.503e-05	-0.00036285	0.001592	-0.00116878	-0.00584902	0.0019693	0.00569893
																						0.107143	0.064692	0.052444	0.071628		83.6	-0.00557702	-0.0041287	-0.00136887	-0.001837	-0.00336539	-0.00253437	0.00370083	0.006637
																						0.688638	0.061458	0.062933	0.070832		83.8	-0.00509787	-0.00330272	-0.0022385	0.00157437	-0.00351638	-0.0017005	0.00166426	0.00658597
																						0.078896	0.043128	0.147719	0.635898		84	-0.00433111	-0.00233769	-0.00057057	0.00168083	-0.00400319	-0.00108867	0.00234359	0.00280644
																						0.040909	0.05391	0.055941	0.081974		84.21	-0.00445127	-0.00033062	0.00202483	-0.00301807	-0.00250856	-0.00368849	-0.00107082	0.00448221
																						0.194806	0.093804	0.229008	0.116993		84.41	-0.00105941	-0.00121749	-0.00138528	4.827e-05	-0.00138489	0.00080459	0.00280661	0.00439846
																						0.034091	0.214562	0.101393	0.088341		84.61	-0.00193624	-0.00033929	0.00274724	0.00058545	-0.00253117	-0.00265197	0.00213958	0.00422088
																						0.278572	0.036659	0.024474	0.688426		84.8	-0.00562278	-0.00075522	0.00039936	0.00186131	-0.00425889	-0.00348312	-0.00037787	0.00097296
																						0.448053	0.031268	0.048074	0.027855		85	-0.0060006	-0.0014157	-0.00034122	-0.00142789	-0.00449409	-0.00218114	0.00172261	0.00608513
																						0.269806	0.102429	0.108385	0.040589		85.21	-0.00582048	-0.00485017	-0.00197507	2.562e-05	-0.00593831	-0.00311769	-0.00090182	0.00456541
																						0.191883	0.113211	0.06643	0.033426		85.41	-0.00451123	-0.00533583	0.00072322	0.00291183	-0.00326673	-0.00684169	0.00458252	0.00614646
																						0.547404	0.038815	0.025348	0.058894		85.61	-0.00197788	-0.00081013	0.0021425	0.00175473	-0.00576878	-0.00168051	0.00327041	0.00240491
																						0.282468	0.026955	1.64064	0.053323		85.82	-0.00573188	-0.00039781	-0.00196943	0.00049118	-0.00379233	-2.71e-05	0.00264862	0.00402978
																						0.267858	0.024799	0.163452	0.057302		86	-0.00532679	-0.00031123	0.00045874	0.00109144	-0.00321004	-0.00611214	0.00096362	0.00565323
																						0.357468	0.076552	0.048074	0.174295		86.2	-0.00535993	-0.00366915	0.00132866	-0.00197192	-0.00622653	-0.006049	-0.00039632	0.00382966
																						0.196754	0.032346	0.230756	0.076403		86.41	-0.00659533	-0.00146749	-0.00233875	0.00460738	-0.00555572	-0.00302893	-0.00026269	0.00302594
																						0.123702	0.078709	0.27883	0.035814		86.61	-0.00597553	-0.00332006	0.00278434	0.0003005	-0.00355903	-0.00351461	0.00247279	0.00597163
																						0.051623	0.045285	0.044578	0.077995		86.81	-0.00285429	-0.00200064	0.00235568	-0.00021877	-0.00182837	0.00089321	0.00693745	0.00245841
																						0.041883	0.159574	0.05157	0.876251		87	-0.00600393	0.00052265	-0.0022215	0.00134587	-0.00206769	0.00057548	-0.0001429	0.00403906
																						0.15487	0.036659	0.100519	0.202946		87.2	-0.00129129	-0.0016849	0.00124145	-0.0010031	-0.00078766	-0.00585621	-0.00264005	0.00605208
																						0.196754	0.05391	0.39683	0.081974		87.41	-0.00572995	-0.00063111	0.00120175	-0.00360566	-0.00319556	-0.00299136	0.0012	0.00389012
																						0.525975	0.240439	0.026222	0.127339		87.61	-0.00451537	-0.00217401	-0.00104725	-0.00015816	-0.00723834	0.00314195	0.00531421	0.00347632
																						0.040909	0.047441	0.032341	0.077199		87.81	-0.00482375	-0.00035147	0.00438504	-0.00111422	-0.00405086	-0.00247392	0.00440517	0.00485325
																						0.187013	0.089491	0.096148	0.562679		88.01	-0.00666106	-0.0016553	0.00110113	0.00159026	-0.00199797	-0.00427843	-0.00047001	0.0076586
																						0.046753	0.07224	0.115378	0.070036		88.2	-0.00870724	-0.00094664	0.00564918	0.00274429	-0.00156038	-0.0001865	0.00088684	0.00681889
																						0.148052	0.043128	0.492104	0.027855		88.4	-0.00530051	-0.00414072	0.00356142	-0.00291993	-0.00360875	0.00045088	0.00470803	0.00360157
																						0.080844	0.034502	0.139852	0.171112		88.61	-0.00358081	-0.00356467	0.00097124	-0.00351075	-0.00231364	-0.00092983	0.0034872	0.0072783
																						0.15487	0.066849	0.603986	1.10546		88.81	-0.0039412	-0.00281241	-0.00138871	0.00069903	-0.00444352	-0.00637347	0.00551339	0.00463187
																						0.230845	0.048519	0.046326	0.027855		89.01	-0.00691834	-0.00068621	0.0014849	-0.00228748	-0.00446454	-0.00467553	0.00503035	0.00369163
																						0.027273	0.086256	0.084785	0.055711		89.2	-0.00499589	0.00151825	-0.00122829	-0.00284225	-0.00047517	-0.00476556	0.00401125	0.00164424
																						0.078896	0.043128	0.214148	0.038998		89.4	-0.00452176	-0.00428205	0.00405864	0.00018823	-0.00345673	-0.00135009	-0.00226285	0.0048781
																						0.059416	0.079787	1.48331	0.035814		89.59	-0.00657185	-0.00262636	-0.00049091	-0.00048426	-0.00311384	0.00124239	0.00323735	0.00624074
																						0.046753	0.071161	0.32166	1.1739		89.81	-0.00419374	-0.00092695	0.00194215	0.00322966	-0.00079246	0.00045837	0.00641223	0.00707103
																						0.217208	0.024799	0.088282	0.457624		90.01	-0.00497211	-0.00276981	0.00319137	0.00032559	-0.00274096	-0.00261623	0.00032433	0.00603134
																						0.128572	0.062536	0.044578	0.048548		90.2	-0.00320109	-0.00102936	0.00122693	0.00039804	-0.0014789	-0.00148061	-0.00071539	0.00713049
																						0.05552	0.04205	0.222015	0.043773		90.4	-0.00075882	0.0020338	-0.00106037	0.00045527	-0.00457714	0.00172431	0.00366033	0.00773648
																						0.050649	0.14987	0.033215	0.040589		90.6	-0.0084226	-0.00202728	0.00038007	0.00278007	-0.00255855	-0.00032509	0.00537356	0.00280697
																						0.046753	0.073318	0.034089	0.035814		90.81	-0.00591174	0.00071006	0.00452538	0.00070178	-0.00316473	-0.00371993	0.00091413	0.00069833
																						0.027273	0.052832	0.117126	0.814173		91.01	-0.00371441	-0.00584765	0.00042866	0.00301633	-0.00221369	0.00065039	0.00415085	0.00441979
																						0.196754	0.048519	0.024474	0.33904		91.21	-0.00381854	-0.00039252	-0.00167788	0.00293293	-0.00120124	-0.00171622	0.00300015	0.00461242
																						0.024351	0.025877	0.06643	0.211701		91.4	-0.00557696	-0.00479106	0.0016985	7.091e-05	-0.00373701	-0.00135676	0.0027902	0.00658796
																						0.06526	0.227501	0.033215	0.126543		91.6	-0.0069753	0.000324	0.00510804	0.00076706	-0.00113604	0.00026212	0.00134287	0.00601421
																						0.047727	0.0841	0.040207	0.077199		91.81	-0.00093001	-0.00728934	-0.00206675	0.0019436	-0.00666996	-0.0032007	-0.00091547	0.00151142
																						0.170455	0.091647	0.028844	0.522885		92.01	-0.00580094	-0.00136942	0.00194651	-6.884e-05	-0.00190911	-0.00420201	0.00323795	0.00574127
																						0.093227	0.03019	0.056815	0.02706		92.21	-0.00621102	0.00035552	0.00021727	0.00055789	-0.00349487	-0.00393758	0.00216232	0.0017689
																						0.043082	0.076552	0.048948	0.689222		92.41	-0.0011005	0.00094206	-0.0038144	5.17e-05	-0.00043433	-0.00164414	0.00283002	0.00429054
																						0.049439	0.132619	0.131111	0.072424		92.6	-0.00380181	-0.00071611	0.00390629	0.00063109	-0.00186337	-0.00028735	0.0027586	0.00133574
																						0.065683	0.100273	0.129363	0.067649		92.8	-0.00646879	0.0010318	-0.00120472	-0.00332893	-0.00464376	-0.00160762	0.00204132	0.00593824
																						0.028957	0.034502	0.153837	0.103463		93.01	-0.00400607	-0.00739897	0.000528	0.00280311	-0.00671311	-0.00415638	0.00035206	0.00457782
																						0.03037	0.03019	0.173067	0.071628		93.21	-0.00286868	-0.0027635	0.00095126	0.00057495	-0.00152414	-0.00080586	0.00359741	0.00230828
																						0.689318	0.034155	0.077793	0.031039		93.41	-0.00479539	-0.00080564	-0.00043236	-0.00091352	-0.00265669	-0.00211166	0.0035645	9.364e-05
																						0.037432	0.103501	0.129327	0.065261		93.6	-0.00567016	-0.00146177	0.00149908	-4e-08	-0.00281996	-0.00315543	0.0016999	0.00717163
																						0.075571	0.054855	0.039021	0.121768		93.8	-0.00249068	-0.00030887	2.149e-05	0.00377882	-0.00866805	-0.00138195	0.002686	0.00430694
																						0.077689	0.054855	0.039021	0.033426		94	-0.00515071	-0.00193334	0.00176143	-0.00162838	-0.00183257	-0.00592441	-0.00096732	0.00310552
																						0.03602	0.0414	0.055745	0.02706		94.21	-0.00486082	-0.00033509	0.00143339	0.00156284	-0.00650166	-0.00178232	0.00030163	0.00251441
																						0.057208	0.04554	0.063549	0.064465		94.41	-0.00309461	-0.00032788	0.00187497	0.00211992	-0.00037739	-0.00188365	0.00344324	0.00551883
																						0.287451	0.063136	0.20514	0.031039		94.6	-0.00632811	-0.00264569	-0.00054397	0.00125658	-0.00219104	-0.00688522	0.00392088	0.00443462
																						0.052264	0.068311	0.027872	0.092321		94.8	-0.00392853	-0.00294705	-0.00095297	0.00259601	-0.00352497	0.00050824	0.00110142	0.00424766
																						0.134897	0.087976	0.034562	0.058098		95	-0.00649259	-0.00386859	-0.00445161	0.00261567	-0.00218807	-0.00380219	0.00627822	0.00495318
																						0.048026	0.095221	0.074698	0.041385		95.19	-0.00666628	-0.00328374	0.00011483	0.00244914	-0.00497016	-0.00133193	0.00415636	0.00383377
																						0.045201	0.042435	0.511735	0.034222		95.41	-0.0062199	-0.00119562	0.00020723	0.0025201	-0.00493799	0.00198222	0.00667272	0.00643384
																						0.048732	0.314643	0.072468	0.030243		95.61	-0.00824002	-0.00253913	0.00130021	0.00194749	-0.00222281	-0.00023929	0.00390986	0.00294286
																						0.227418	0.04554	0.224093	0.207722		95.8	-0.00774775	-0.00086206	-0.00070262	0.00271463	-0.00043145	-0.00056344	0.00604286	0.00479104
																						0.088284	0.034155	0.081387	0.101075		96	-0.00801465	0.00011415	0.00163284	-3.915e-05	0.00093719	-0.00210527	0.00361899	0.0045757
																						0.059327	0.02898	0.144936	0.042977		96.2	-0.00229761	0.00182239	0.00414462	0.00086288	-0.00364258	-0.00592079	0.00429899	0.00681538
																						0.428705	0.273242	0.030102	0.037406		96.41	-0.00269766	-0.00198286	0.00208818	0.00150602	-0.00216905	-0.00261946	0.00444425	0.0034712
																						0.032488	0.038295	0.096996	0.22921		96.61	-0.00865576	-0.00068582	0.00144386	-0.00077585	-0.00465105	-0.00172353	-3.018e-05	0.00230178
																						0.483087	0.04347	0.304365	0.026264		96.81	-0.00819545	-0.00048994	0.00242573	0.00028749	-0.00181706	-0.00218597	0.00232481	0.00779688
																						0.112297	0.078661	0.341157	0.057302		97	-0.00070655	-0.00172893	-0.00101461	-0.00107466	-0.00493138	-0.00366524	0.00188551	0.00407054
																						0.403279	0.0414	0.069123	0.045364		97.2	0.0005946	-0.00397962	0.00193287	0.00176818	-0.00372286	0.00095905	0.00235293	0.0035751
																						0.391273	0.070381	0.234127	0.091525		97.4	-0.00384118	-0.00269092	0.0006816	0.00165533	-0.00235019	-0.0026112	0.00531573	0.0052428
																						0.085458	0.239087	0.168349	0.031835		97.61	-0.00555668	-0.00088411	0.00304448	-0.00081922	-0.00599757	0.00075555	0.00356666	0.00432771
																						0.731694	0.072451	0.129327	0.044569		97.81	-0.00593444	-0.00325554	-0.00016925	-0.00248233	-0.00408661	-0.0018901	0.0022508	0.00343078
																						0.038138	0.044505	0.210714	0.048548		98.01	-0.00163123	-0.00465061	0.00035975	0.00247823	-0.00495065	-0.00072352	0.00453081	0.00262122
																						0.228831	0.066241	0.61542	0.269799		98.2	-0.00459505	-0.00181306	-0.00215876	0.00226927	-0.00445609	-0.00088332	0.00199987	0.0044298
																						0.107353	0.034155	0.045711	0.089137		98.4	-0.0032245	-0.00074446	0.0013563	0.00184742	-0.00150667	-0.00599548	0.00446036	0.00455695
																						0.024013	0.02484	0.137132	0.034222		98.61	-0.00471221	-0.00274798	-0.00180899	0.00109018	-0.00279986	-0.00263427	0.00273511	0.00497313
																						0.075571	0.080731	0.040136	0.053323		98.81	-0.00512072	-0.00016554	-0.00451341	-0.00151075	-0.0024119	-0.0014614	0.00105747	0.00471711
																						0.065683	0.104536	0.053515	0.045364		99.01	-0.00378908	-0.00200066	0.00279388	0.00208611	-0.00629108	-0.00032849	0.00546432	0.00192428
																						0.105234	0.076591	0.298791	0.084362		99.2	-0.0074982	-0.00208262	0.00068698	0.00439477	-0.00319256	-0.00164432	0.00236023	0.00459938
																						0.50145	0.030015	0.124868	0.058894		99.4	-0.0039499	0.00204274	0.00147484	-0.0005409	-0.00181126	-0.00293977	0.00362124	0.00566363
																						0.290276	0.102466	0.089191	0.124155		99.61	-0.0028865	0.00094834	-0.00179151	-0.00052253	-0.00292161	-0.00075927	0.00183599	0.00660976
																						0.430117	0.089011	0.05463	0.027855		99.81	-0.00915573	0.0006617	-0.00355765	-0.00181534	-0.00487313	-0.00473937	0.00412641	0.00162915
																						0.026838	0.044505	0.030102	0.066853		100.03	-0.00504634	-0.0029231	0.00030799	-0.00158651	-0.00080935	-0.00075811	-0.00062146	0.00242475
																						0.374322	0.05382	0.070238	0.127339		100.2	0.00020526	-0.00455429	-0.00071841	-0.00127933	-0.00719316	-0.00030936	0.00291666	0.00425657
																						0.185042	0.060031	0.523999	0.107442		100.4	-0.00413999	-0.00417561	-0.00028842	0.00040062	-0.00345692	-0.00211292	0.00379578	0.00352086
																						0.559364	0.161461	0.063549	0.052527		100.6	0.00121767	-0.00456318	-0.00045638	0.00274254	-0.00683614	-0.00539948	0.00222972	0.00108552
																						0.241544	0.02691	0.031217	0.104259		100.81	-0.00537323	-0.00131491	0.0001071	0.000357	-0.00446994	-0.00306848	0.00018284	0.00746589
																						0.081927	0.098326	0.279838	0.066057		101.01	-0.00362768	-0.00020732	-0.00244901	0.00098878	-0.00119515	-0.00643573	0.00438451	0.00757805
																						0.334771	0.03933	0.338927	0.043773		101.21	-0.00492902	-0.00096908	-5.049e-05	0.00078817	-0.00667786	-0.00046502	0.00241049	0.00513465
																						0.104528	0.034155	0.699037	0.048548		101.4	-0.00033956	-0.00023288	-0.00129075	0.00257102	-0.00193934	-0.00421757	0.00331595	0.00194747
																						0.149023	0.074521	0.484978	0.024672		101.6	-0.00503046	-0.00466649	-0.00402868	0.00117606	-0.00402684	-0.0027157	0.00204486	0.00733978
																						0.032488	0.05175	0.391327	0.072424		101.8	-0.00692293	-0.00113711	0.00351509	-0.00061026	-0.00512904	0.00142293	0.002045	0.0030681
																						0.099584	0.05382	0.945428	0.045364		101.99	-0.00195793	0.00050023	-0.00204727	0.00064503	-0.00481426	-0.0035919	0.00145223	0.00123263
																						0.055795	0.164566	1.49507	0.131318		102.21	-0.00701416	-0.00166293	-0.00243646	0.00088798	-0.00636056	-0.00156303	-0.00074898	0.0054132
																						0.029663	0.095221	0.039021	0.03661		102.41	-0.00395881	-0.00293214	0.00089662	-0.00143711	-0.00520185	-0.00373993	0.00426198	0.00202724
																						0.151141	0.117991	0.228553	0.069241		102.6	-0.00632386	-0.00490876	0.00443217	-0.0003597	-0.00458916	0.00077128	0.00133156	0.00248562
																						0.024013	0.032085	0.113719	0.032631		102.8	-0.0016429	-0.00079636	0.00017956	-0.00069255	-0.00803231	-0.00066992	0.00506553	0.00478782
																						0.068508	0.54545	0.246391	0.089137		103	-0.00205203	-0.00238466	-0.00095987	0.00161488	-0.00306096	0.0008796	0.00466517	0.0024344
																						0.207643	0.027945	0.183957	0.035814		103.21	-0.00249892	0.0004564	-0.0002037	-0.00162041	-0.00505753	-0.00074442	0.00267215	0.0016176
																						0.206937	0.201827	0.606501	0.145644		103.41	-0.00918847	0.00177871	0.00568443	0.00227835	-0.00246014	-0.0028506	0.00135501	0.00390381
																						0.040964	0.080731	0.040136	0.027855		103.61	-0.00565432	-0.00222359	0.00197867	0.00056736	-0.00452158	0.0007307	0.00209489	0.00388325
																						0.080515	0.05382	0.064664	0.045364		103.8	-0.0031494	-0.00692823	0.00043389	0.00309834	-0.00305057	-0.00087086	-0.00069739	0.00412075
																						0.062152	0.064171	1.33118	0.051731		104	-0.00522428	0.00295127	0.00133827	-0.00338218	-0.00536307	-0.00204062	0.00772721	0.00234429
																						0.099584	0.04347	0.056859	0.075607		104.21	-0.00491347	0.0002302	0.00246882	0.00032892	-0.00282686	-0.00587821	0.00040995	0.00112457
																						0.081927	0.221492	0.144936	0.054915		104.41	-0.007536	-0.00167308	-0.00223785	0.00329441	-0.00480767	-0.0061413	0.00414391	0.00519922
																						0.181511	0.225632	0.081387	0.031039		104.61	-0.00403879	-0.00362562	0.00142815	0.00072663	-0.00375583	-0.00030273	0.00244867	0.00673946
																						0.069921	0.073486	0.051285	0.042977		104.8	-0.00258957	-0.00410161	3.664e-05	-0.00076469	-0.00582832	-0.00279957	0.00129233	0.00792677
																						0.066996	0.252542	0.185072	0.062874		105	-0.00422624	-0.00362962	-0.00144041	-0.00034161	-0.00718207	-0.0008997	0.0034919	0.00504814
																						0.083267	0.046575	0.238587	0.038998		105.21	-0.00147829	-0.00112017	-2.278e-05	-0.00160936	-0.00288623	-0.00282493	0.00035381	0.00676076
																						0.041155	0.025875	0.035677	0.104259		105.41	-0.00427051	-0.00046967	0.00129246	-0.00049712	-0.00528905	-0.00482162	-0.00055615	0.00622318
																						0.054554	0.061066	0.059089	0.028651		105.61	-0.0051945	-0.00296948	-0.00145383	-0.00209697	-0.0051628	-0.00359434	0.00118484	0.00685663
																						0.107194	0.03312	0.224093	0.08277		105.81	-0.00292589	-0.00224152	-0.00117862	0.00147421	-0.00326498	-5.965e-05	0.00326308	0.00507888
																						0.369436	0.120061	0.028987	0.120972		106	-0.00709892	0.00232722	0.00104493	-0.00100805	-0.00329328	-0.00139772	0.00605996	0.00343576
																						0.048812	0.098326	0.074698	0.079587		106.2	-0.00488625	-0.00152897	-0.00240663	0.00486821	-0.00226879	-0.00229619	0.0056685	0.00355934
																						0.048812	0.036225	0.074133	0.041774		106.41	-0.00427294	0.00241361	0.00235891	0.00132917	-0.00133715	-0.00057932	0.00167516	0.010319
																						0.051683	0.030015	0.050966	0.051057		106.61	-0.00207339	-0.00123391	0.00228556	0.00196515	-0.00488565	-0.00151228	0.00331369	0.00699415
																						0.124422	0.03312	0.0278	0.060341		106.81	-0.00610466	0.00056899	0.00237022	0.0004935	-0.00212855	0.00260604	0.00711483	0.00678096
																						0.025841	0.044505	0.052511	0.032491		107.01	-0.00649933	0.00016465	0.00147985	0.00060566	-0.00302387	-0.00050147	0.00023614	0.00572232
																						0.033498	0.065206	0.250199	0.046416		107.2	-0.00727277	0.00010136	-0.00037632	-0.00140332	-0.00360547	-0.00300023	0.00050355	0.00472497
																						0.07561	0.02484	0.057144	0.055699		107.4	-0.00603614	-0.00057189	-0.00242325	0.00148028	5.588e-05	0.0010813	0.0033432	0.00717057
																						0.433561	0.03933	0.033978	0.033652		107.61	-0.00586814	-0.00082438	-0.00084125	-3.545e-05	-0.00207971	-0.0028334	-0.00073544	0.00586616
																						0.235444	0.171812	0.035522	0.071945		107.81	-0.00504959	6.682e-05	0.00075847	-0.00042439	-0.00462299	-0.00521623	-0.0016594	0.00570572
																						0.073696	0.02898	0.026255	0.02901		108.01	-0.00433598	0.00118585	0.00272821	0.00611085	-0.00520016	-0.0052993	0.00394416	0.00563688
																						0.376136	0.0414	0.044789	0.03017		108.18	-0.00186311	-0.00254537	-0.00092965	0.00172901	-0.00290803	0.00059933	-0.00087107	0.00587325
																						0.05264	0.065206	0.032433	0.336515		108.4	-0.00572683	-0.00029644	-0.00089111	-0.00302953	-0.00423645	-0.00131137	0.00200572	0.00831719
																						0.166533	0.062101	0.0695	0.041774		108.61	-0.00780632	-0.00421726	0.00342935	-0.00087847	-0.00363643	0.00103356	0.0024703	0.00454592
																						0.69676	0.03726	0.029344	0.118361		108.81	-0.00579632	0.00048202	-0.00139098	0.00018318	-0.0026292	-0.00325419	0.00139372	0.0068294
																						0.067953	0.079696	0.091122	0.038293		109.01	-0.00682567	-0.00414881	0.00034461	0.00129137	-0.00112718	-0.00206187	0.00304169	0.00544698
																						0.597223	0.116956	0.029344	0.034812		109.2	-0.00346267	-0.00416689	0.00161506	0.00165631	0.00085857	-0.00252549	0.00293214	0.00366013
																						0.044983	0.090046	0.23321	0.025529		109.4	-0.00533927	0.00103252	-0.00151083	-0.00367631	-0.00668942	-0.00402459	4.7e-06	0.00252855
																						0.046897	0.030015	0.060233	0.052218		109.6	-0.00228825	-0.00153355	0.00118534	3.58e-06	-0.00449856	-0.00390441	0.0011437	0.00425477
																						0.026798	0.02898	0.094211	0.089351		109.81	-0.00366084	-0.00228937	0.00287136	0.003557	-0.0023135	-0.00390412	0.00121083	0.00508151
																						0.035412	0.064171	0.066411	0.075426		110.01	-0.00635462	-0.00474067	-0.00052503	0.00084485	-0.0023928	-0.00328411	0.00257653	0.00662844
																						0.044026	0.168707	0.046333	0.025529		110.21	-0.00682787	-0.00243557	-0.00033442	0.00292471	-0.00465038	-0.00270902	-0.00090938	0.0073425
																						0.20386	0.078661	0.040155	0.112559		110.4	-0.0018227	-0.00189209	0.00298828	-0.00074957	-0.00378072	-0.00535455	0.00319117	0.00452955
																						0.137821	0.025875	0.0834	0.064982		110.6	-0.00547157	-0.00173642	0.00174834	0.00193671	-0.00156918	-0.00900931	0.00340017	0.00564059
																						0.824053	0.03726	0.31661	0.03017		110.81	-0.00224624	-0.00042568	0.00193608	0.00027449	-0.00221112	-0.00588158	0.00503541	0.00435424
																						0.084224	0.077626	0.049422	0.02785		111.01	-0.00451097	-0.00247067	0.00138623	0.00335608	-0.00268213	-0.00350984	-0.00127942	0.00608594
																						0.060297	0.193547	0.0417	0.091671		111.21	-0.0067119	-0.00266654	-0.00123965	-3.836e-05	-0.00027865	-0.00290175	-0.00018501	0.00798894
																						0.081353	0.091081	0.353676	0.08703		111.41	-0.0084209	-0.00102232	0.00086995	0.00027087	-0.00359926	-0.00283374	0.00458697	0.00826405
																						0.070825	0.086941	0.19151	0.024368		111.6	-0.00638361	-0.00092832	0.00188929	0.00357431	8.064e-05	-0.0030245	0.00589257	0.00243031
																						0.047854	0.069346	0.026255	0.066143		111.8	-0.00754557	-0.00335627	-0.00076884	0.00156765	-0.00537201	-0.00298879	0.00303514	0.00278045
																						0.02967	0.084871	0.024711	0.075426		112.01	-0.00523114	-0.00224462	0.00114853	-0.00250844	-0.00167372	-0.0020346	-0.00014505	0.00597718
																						0.041155	0.096256	0.024711	0.100955		112.21	-0.00519444	0.00056313	-0.00187214	0.0016676	-0.00224247	-0.00572691	0.00020619	0.00512306
																						0.331153	0.075556	0.211588	0.024368		112.41	-0.00428664	-0.00127332	0.00116842	0.00112269	-0.00600536	-0.00569397	0.00384992	0.00050902
																						0.027756	0.025875	0.024711	0.091671		112.6	-0.00418598	-0.00297406	0.0022916	0.00207528	-0.00484631	-0.00152168	0.00660206	0.00627292
																						0.096666	0.0414	0.035522	0.031331		112.8	-0.00212161	0.00076426	0.00210874	0.00202877	-0.00712278	-0.0027336	0.00177611	0.00631223
																						0.028713	0.146971	0.050966	0.075426		113	-0.00474364	-0.00262237	0.00206878	-0.00127807	-0.00577335	-0.00258831	0.00490036	0.00340768
																						0.074653	0.192512	0.032433	0.041774		113.21	-0.00477029	-0.00199403	-0.00038176	3.718e-05	-0.00600096	-0.00390541	0.00205115	0.00421974
																						0.876693	0.093151	0.259466	0.242523		113.41	-0.00757335	-0.0014638	0.00021181	-0.00183983	-0.00628562	-0.00279823	0.00578013	0.00570269
																						0.06891	0.254612	1.47803	0.048737		113.61	-0.00921712	-0.00547184	-0.00066809	0.00289063	-0.00357377	-0.00367051	0.00318473	0.00566096
																						0.111979	0.03519	1.36683	0.142729		113.8	-0.00493675	-0.00116102	0.00094464	0.00149089	-0.00068965	-0.00248025	0.00606828	0.00626913
																						0.125379	0.096256	0.16371	0.033652		114	-0.00787691	-0.00358858	0.00125531	0.00086937	-0.00206119	0.00084138	0.00093643	0.00197772
																						0.163662	0.228737	0.064866	0.054539		114.21	-0.00497295	-0.0007966	-0.00012318	0.00012259	-0.00161344	-0.00462689	0.00295975	0.00732815
																						0.066039	0.061066	0.775308	0.064982		114.41	-0.00563054	-0.00231358	0.00101351	0.00042625	-0.00503699	-0.0030608	0.00010833	0.00375103
																						0.040198	0.070381	0.27491	0.026689		114.61	-0.00489925	-0.0029861	0.00428715	-0.00077766	-0.00516804	-0.00222726	0.00168134	0.00588314
																						0.255543	0.075556	1.9985	0.034812		114.82	-0.00127131	-0.00203437	0.00492659	0.00170977	-0.00473783	-0.00273649	0.00359057	0.0044773
																						0.08231	0.032085	0.035522	0.830844		115	-0.00919908	-0.00116703	-0.00036186	0.00192983	-0.00199989	-0.00238678	0.00355147	0.00772565
																						0.209602	0.099361	0.047878	0.394535		115.2	-0.00484902	-0.00330354	0.00021272	0.00156085	-0.00116375	-0.00227655	0.00183031	0.0039158
																						0.691975	0.212177	0.0417	0.054539		115.41	-0.0058316	-0.00122216	0.00237314	0.0009293	-0.00192482	-0.00406274	0.00225511	0.00263743
																						0.101451	0.065206	0.134366	0.047576		115.61	-0.0063311	-0.00264864	-0.0015839	-0.00211184	-0.00374687	0.00171291	0.00243807	0.00378337
																						0.735044	0.082801	0.049422	0.02901		115.81	-0.00486537	-0.00025594	0.00156518	0.00314282	-0.00426298	-0.00705393	0.0030405	0.00590694
																						0.428776	0.103501	0.387654	0.02901		116	-0.00344108	0.00095712	-0.00128307	-0.00206939	-0.00106211	9.5e-05	0.00203092	0.00547423
																						0.155048	0.025875	0.101933	0.283137		116.2	-0.00783651	-0.00164602	-0.00072624	0.00235464	-0.00475606	-0.00456043	0.00301959	0.00616078
																						0.103366	0.044505	0.447887	0.070784		116.41	-0.00550112	-0.00104117	4.153e-05	-0.00050454	-0.00212984	-0.00121318	0.00138867	0.00824278
																						0.405805	0.0414	0.114288	0.216994		116.61	-0.00487689	-0.00175413	0.00172113	-0.0013276	-0.00107296	-0.0039092	0.00304642	0.00223424
																						0.247886	0.283593	0.088033	0.246004		116.81	-0.00700201	-0.00078466	0.00254373	0.00233176	-0.00364599	-0.00077749	0.00561919	0.002037
																						0.02967	0.136621	0.123555	0.032491		117	-0.00226811	0.00020467	-0.00019498	0.00198504	-0.00248211	-0.0037666	0.00249524	0.00673269
																						1.1954	0.032085	0.134366	0.063822		117.2	-0.00210856	-0.00300648	0.00115497	-0.00245362	-0.00401104	-0.00428514	0.00049751	0.00494335
																						0.028713	0.061066	2.33982	0.068463		117.4	-0.00470355	-0.00258439	0.00245362	-0.00134678	-0.00448652	-0.00340833	0.00270834	0.00783468
																						0.077524	0.073486	1.17841	0.186824		117.61	-0.00536446	-0.00156621	0.00158592	-0.00169847	-0.00221897	0.00121741	0.00398804	0.00772311
																						0.592438	0.461614	0.245566	0.139248		117.81	-0.00209834	-0.00518203	-0.00261378	-1.962e-05	-0.00341428	-0.00220447	0.0028953	0.00429586
																						0.060297	0.065206	0.420087	0.104436		118.01	-0.00554803	0.00126255	-0.00036047	0.00277806	-0.0089167	-0.00588115	0.00462327	0.00258176
																						0.314882	0.123166	0.038611	0.047576		118.2	-0.00673453	-0.0041156	0.0027255	6.507e-05	-0.0061069	-0.00645099	0.00468382	0.0045389
																						0.028713	0.079696	0.857163	0.026689		118.4	-0.00595162	-0.00350761	0.00127952	0.00137571	-0.00399211	-0.0003707	0.00357205	0.00372463
																						0.046897	0.04761	0.024711	0.049897		118.61	-0.00154082	-0.00042436	-0.00077866	0.00068199	-0.00389852	-0.00121973	0.00108084	0.00327751
																						0.465145	0.116956	0.033978	0.074265		118.81	-0.00615581	-0.00624292	-0.00069145	0.00022472	-0.0018714	0.00129836	0.00433672	0.00342708
																						0.050726	0.267032	0.032433	0.226277		119.01	-0.00441021	-0.00455692	0.00145557	0.00063394	-0.00024233	-0.00435589	0.00306669	0.00320886
																						0.047854	0.042435	0.030889	0.041774		119.21	-0.00568189	-0.0006304	0.00065201	0.00169558	-0.00203465	-0.00221288	0.00461994	0.00816601
																						0.140692	0.038295	0.029344	0.481565		119.4	-0.00309072	-0.00188831	-0.00011957	0.00187134	-0.00399787	-0.00303981	0.00216051	0.00384695
																						0.103366	0.077626	0.108111	0.121842		119.6	-0.0029215	-0.00088934	0.00226462	0.00213091	0.00131794	-0.00275585	0.00159634	0.010808
																						0.103366	0.076591	0.299621	0.288939		119.81	-0.0044496	-0.00551797	-0.00044532	0.0032251	0.0002798	-0.00414629	0.0018004	0.00720418
																						0.152177	0.034155	0.106566	0.126483		120.01	0.0885853	0.105872	0.0274997	0.0239287	0.0187572	0.0179024	0.0350795	0.0280395
																						0.135907	0.065206	0.058689	0.060341		120.21	0.127159	0.134633	0.0287189	0.0300179	0.0280338	0.0217698	0.0384632	0.0361577
																						0.112936	0.05382	0.874152	0.052218		120.41	0.146592	0.147698	0.0365467	0.0360086	0.0318929	0.0339274	0.0470672	0.0397493
																						0.179933	0.058996	0.029344	0.064982		120.61	0.165639	0.151129	0.0392638	0.0407009	0.0331881	0.0323553	0.0523191	0.047704
																						0.025841	0.04347	1.72205	0.063822		120.82	0.177607	0.163827	0.041238	0.0431556	0.0352004	0.032004	0.053324	0.0506098
																						1.01356	0.062101	0.032433	0.099794		121.02	0.190808	0.171982	0.0425813	0.0490034	0.0432757	0.0371898	0.0583747	0.0546094
																						0.285212	0.123166	1.01161	0.048737		121.21	0.203254	0.176365	0.0487645	0.0501146	0.0448847	0.0415844	0.0565527	0.0550081
																						0.055511	0.094186	0.117377	0.033652		121.41	0.203824	0.182935	0.0508255	0.0540034	0.0463957	0.0403666	0.066617	0.0593101
																						0.085181	0.063136	0.118922	0.025529		121.61	0.214281	0.189649	0.0512185	0.0528213	0.0517296	0.0415261	0.0644613	0.059241
																						1.09204	0.03519	0.117377	0.031331		121.81	0.21432	0.191875	0.0569855	0.0590985	0.050766	0.0453649	0.0647714	0.0646168
																						0.328281	0.052785	0.959096	0.43863		122.02	0.22594	0.195228	0.0555851	0.0575026	0.0523189	0.0462784	0.0712204	0.0625332
																						0.109108	0.04554	0.050966	1.16852		122.22	0.227964	0.198375	0.060446	0.0586518	0.0553756	0.0450896	0.0668213	0.0673109
																						0.060297	0.089011	0.200777	0.230919		122.41	0.229105	0.203576	0.060328	0.0651651	0.0589954	0.0454831	0.0725447	0.0657191
																						0.219173	0.062358	0.1112	0.054539		122.61	0.235092	0.205284	0.0608164	0.0624882	0.0563352	0.0469087	0.0735493	0.0703851
																						0.12825	0.028651	0.078766	0.081228		122.81	0.236821	0.209768	0.0652983	0.0640327	0.0626589	0.0489229	0.0761242	0.0672649
																						0.228744	0.101964	0.038611	0.035972		123.02	0.246526	0.21077	0.0602342	0.0664544	0.0605346	0.0481659	0.0763636	0.072124
																						0.23353	0.032864	0.061778	0.090511		123.22	0.247479	0.210708	0.06484	0.0673228	0.0605171	0.0476035	0.0758164	0.0786918
																						0.285212	0.068257	0.077222	0.040614		123.41	0.244247	0.217553	0.0670156	0.0685863	0.0645259	0.0503411	0.0766242	0.0740248
																						0.096666	0.042976	0.033978	0.025529		123.61	0.249445	0.219624	0.065611	0.0671435	0.0661105	0.0494183	0.0826928	0.0771886
																						0.044983	0.336227	0.026255	0.258769		123.81	0.2519	0.22198	0.0691449	0.0698784	0.0662087	0.0511753	0.0822473	0.0765936
																						0.261285	0.029494	0.033978	0.603406		124.01	0.257337	0.222207	0.0685925	0.0724314	0.0690664	0.0512142	0.0797845	0.0797657
																						0.044983	0.041291	0.050966	0.236721		124.22	0.256785	0.227391	0.0689398	0.0709444	0.0645367	0.0538355	0.0812339	0.0811039
																						0.024884	0.091851	0.024711	0.093992		124.42	0.262713	0.228932	0.075187	0.0731723	0.0681718	0.0521572	0.0809648	0.0790433
																						0.181847	0.160951	0.033978	0.49781		124.61	0.26315	0.229066	0.0714384	0.0770554	0.0691179	0.0529329	0.084476	0.0823385
																						0.026798	0.28061	0.058689	0.044095		124.81	0.26439	0.232187	0.0738594	0.0754072	0.0704052	0.0561317	0.0835198	0.08392
																						0.032541	0.031179	0.064818	0.191466		125.01	0.266591	0.23471	0.0712174	0.0750046	0.0723781	0.0516328	0.0860403	0.0832117
																						0.175147	0.122188	0.024376	1.07569		125.22	0.273663	0.241082	0.0738693	0.076717	0.0723439	0.0539786	0.0887501	0.0841264
																						0.049565	0.075841	0.024376	0.359723		125.42	0.267369	0.242854	0.077032	0.079806	0.0761393	0.054868	0.0876458	0.0819101
																						0.095898	0.061515	0.029916	0.46764		125.61	0.2721	0.240386	0.0786038	0.0798636	0.0723724	0.0549584	0.0885523	0.087987
																						0.12068	0.058987	0.047644	0.187984		125.81	0.26988	0.240828	0.0766557	0.0810879	0.0750437	0.0558546	0.0902101	0.0858101
																						0.031248	0.026966	0.026038	0.064982		126.01	0.275579	0.244892	0.0792801	0.0811349	0.0763541	0.0595441	0.0858994	0.0853271
																						0.026938	0.246903	0.028808	0.041774		126.21	0.275406	0.241311	0.0767333	0.0807929	0.0786412	0.0592756	0.0937481	0.0872984
																						0.063573	0.03792	0.047644	0.077747		126.42	0.276745	0.247323	0.0816633	0.0837494	0.0763069	0.0575777	0.0891096	0.0888169
																						0.11637	0.039606	0.089748	0.239042		126.62	0.279463	0.250225	0.0796117	0.0844683	0.0776794	0.0618212	0.0922826	0.0889916
																						0.178865	0.044662	0.070912	0.083549		126.81	0.284517	0.250658	0.0794951	0.0868799	0.0741599	0.0614386	0.0924966	0.0909898
																						0.170245	0.060673	0.026592	0.329553		127.01	0.280223	0.25213	0.0786298	0.0847274	0.0791164	0.0557515	0.094415	0.0944194
																						0.072193	0.305048	0.82934	0.55467		127.21	0.281717	0.254168	0.0803701	0.0876799	0.0779273	0.0553994	0.0961396	0.0899067
																						0.17671	0.055616	0.356777	0.973573		127.42	0.28285	0.256753	0.0797775	0.0825575	0.0761414	0.0602022	0.0939874	0.0933377
																						0.367428	0.03792	0.335725	0.105596		127.62	0.280747	0.255828	0.0803295	0.0828392	0.0798629	0.0560505	0.0957249	0.092016
																						0.247825	0.048032	0.388355	0.830844		127.81	0.286362	0.256063	0.0814832	0.0858413	0.0775305	0.0613915	0.0953656	0.0925662
																						0.078658	0.05056	0.187806	0.095153		128.01	0.292868	0.260952	0.0827602	0.0871456	0.0787807	0.0570075	0.100013	0.091196
																						0.149773	0.026123	0.341819	0.095153		128.21	0.287455	0.263771	0.0836818	0.0867238	0.0857988	0.0610002	0.0949195	0.0942581
																						0.21119	0.144097	0.025484	0.038293		128.41	0.294866	0.264847	0.0839818	0.0849112	0.0839502	0.061186	0.102168	0.0933967
																						0.161625	0.029494	0.065926	0.040614		128.62	0.291232	0.264514	0.0827597	0.0908143	0.0815886	0.0623175	0.0978951	0.0943128
																						0.02586	0.049718	0.279771	0.02901		128.82	0.294061	0.263651	0.0846564	0.0892694	0.0827082	0.0598489	0.0995951	0.0920987
																						0.160548	0.067414	0.298053	0.051057		128.99	0.297055	0.265002	0.0854928	0.0914659	0.0839674	0.0586471	0.102168	0.0965122
																						0.032325	0.036235	0.045428	0.200749		129.21	0.294463	0.266768	0.0867142	0.0918061	0.083085	0.0652341	0.0997758	0.100562
																						0.070038	0.116289	0.067034	0.05802		129.41	0.299423	0.265348	0.0831433	0.092084	0.0884204	0.060666	0.0982719	0.0971905
																						0.07327	0.278925	0.407745	0.073105		129.6	0.294206	0.268369	0.089007	0.0930864	0.0828911	0.0637908	0.0995916	0.0985278
																						0.153005	0.123873	0.278663	0.370167		129.82	0.298353	0.27192	0.0830507	0.0927095	0.0871845	0.0606577	0.103385	0.0980202
																						0.379281	0.127244	0.486413	0.430507		130	0.297372	0.272139	0.0902254	0.0905097	0.0875689	0.0627391	0.0982123	0.100703
																						0.568921	0.075841	0.033794	0.095153		130.19	0.299084	0.27355	0.0869291	0.0937879	0.0899863	0.0603537	0.104487	0.0981578
																						0.17671	0.101121	0.08864	0.061501		130.41	0.30112	0.275297	0.0868257	0.0964053	0.0891772	0.065432	0.104284	0.10313
																						0.024783	0.027808	0.10803	0.070784		130.61	0.302858	0.275531	0.0868067	0.0921326	0.088987	0.0655628	0.103605	0.100909
																						0.04741	0.057302	0.093072	0.053378		130.82	0.302523	0.275924	0.0896785	0.0972034	0.0869363	0.063793	0.10626	0.100228
																						0.028015	0.055616	1.6958	0.113719		131.02	0.301418	0.276689	0.0876244	0.0974017	0.087237	0.061752	0.105375	0.101576
																						0.286616	0.030336	1.26811	1.77193		131.21	0.306608	0.278313	0.0914225	0.0946496	0.0881228	0.0646787	0.104357	0.103513
																						0.203648	0.035392	1.47254	0.869137		131.41	0.302625	0.276228	0.091006	0.0951884	0.0925514	0.0611905	0.103979	0.102133
																						0.640036	0.024438	0.262597	0.226277		131.61	0.301604	0.277727	0.0905859	0.0938567	0.0869858	0.0654164	0.103083	0.100404
																						0.521511	0.230893	0.062048	0.38061		131.82	0.308302	0.279503	0.0904281	0.0968216	0.09382	0.0665015	0.108169	0.100875
																						0.153005	0.135671	0.076452	0.05918		132.02	0.307681	0.2837	0.0944114	0.0967231	0.0912711	0.0702625	0.10984	0.106195
																						0.026938	0.1323	0.371735	0.216994		132.21	0.307503	0.286245	0.0935121	0.0992924	0.0938992	0.0636478	0.106583	0.104845
																						0.074348	0.19213	0.029916	0.342317		132.41	0.310662	0.284657	0.0913824	0.0972897	0.0922107	0.0698337	0.106666	0.104113
																						0.067883	0.20814	1.21936	0.034812		132.61	0.307463	0.28842	0.0917395	0.0989832	0.0921406	0.0652362	0.108184	0.100207
																						0.108828	0.174434	0.034902	0.659105		132.81	0.307099	0.285462	0.09122	0.0990139	0.0904801	0.0694575	0.106675	0.109294
																						0.035558	0.05983	0.570621	0.2344		133.02	0.315873	0.284248	0.0941933	0.10072	0.0925093	0.0640013	0.111314	0.103821
																						0.065728	0.036235	1.35287	0.43979		133.22	0.30962	0.285077	0.0951017	0.0981793	0.091092	0.0701083	0.111916	0.107794
																						0.063573	0.165164	0.042104	0.024368		133.41	0.310623	0.282987	0.0977767	0.0990357	0.0948897	0.0670596	0.112262	0.108719
																						0.104518	0.118817	0.026592	0.223957		133.59	0.314416	0.287143	0.0924947	0.0988243	0.0922679	0.0647415	0.109881	0.105356
																						0.11637	0.112918	0.591119	0.040614		133.81	0.317334	0.294092	0.0975563	0.0972746	0.0959983	0.0655468	0.110799	0.108986
																						0.171323	0.056459	0.476441	0.056859		134.01	0.316223	0.291675	0.0947305	0.100401	0.0942603	0.0721478	0.110011	0.108243
																						0.046333	0.038763	0.029916	0.031331		134.22	0.318511	0.291309	0.0981785	0.10624	0.0953796	0.064995	0.113717	0.110937
																						0.295236	0.115446	0.141824	0.472282		134.4	0.313332	0.295072	0.0971538	0.104259	0.0953395	0.0669604	0.108721	0.111389
																						0.074348	0.027808	0.084208	0.156654		134.61	0.315818	0.293574	0.0990648	0.102216	0.0947345	0.0660223	0.114279	0.111056
																						0.15085	0.058987	0.780034	0.039453		134.81	0.316144	0.295287	0.097423	0.102166	0.095145	0.0691225	0.112961	0.106875
																						0.207958	0.191287	0.911886	0.02785		135.01	0.321287	0.294298	0.0985954	0.103406	0.100518	0.0694568	0.117276	0.109861
																						0.101285	0.166849	0.078114	0.02785		135.22	0.318589	0.293511	0.0981336	0.101895	0.0939125	0.0691403	0.112876	0.107977
																						0.104518	0.197186	1.65702	0.084709		135.42	0.319399	0.297474	0.0998411	0.10329	0.0946112	0.068858	0.11112	0.112424
																						0.113585	0.112076	0.049306	0.131125		135.61	0.320584	0.294183	0.0985029	0.10832	0.0990253	0.0699104	0.112372	0.11524
																						0.249076	0.053088	0.038226	0.344638		135.81	0.322542	0.294894	0.100603	0.105537	0.101849	0.072108	0.117172	0.113839
																						0.267736	0.055616	0.037672	0.053378		136.01	0.321691	0.300454	0.100391	0.104347	0.0941563	0.070663	0.114191	0.10967
																						0.034075	0.057302	0.04709	0.157814		136.21	0.322705	0.299244	0.0995952	0.1055	0.099084	0.0703886	0.114751	0.111249
																						0.066528	0.104492	0.115786	0.05802		136.42	0.322018	0.301761	0.102185	0.10682	0.100636	0.0681104	0.113377	0.11019
																						0.035698	0.08511	0.055954	0.333034		136.62	0.324718	0.300594	0.101927	0.106909	0.0987813	0.0726808	0.115081	0.11295
																						0.032453	0.04719	0.064818	0.068463		136.81	0.328664	0.303168	0.099434	0.108801	0.0990904	0.0718066	0.113269	0.109559
																						0.109528	0.155895	0.025428	0.047576		137.01	0.327457	0.300858	0.104468	0.11046	0.101223	0.0685408	0.117212	0.111704
																						0.047868	0.03792	0.048948	0.055699		137.21	0.325696	0.305201	0.100563	0.110723	0.100769	0.0706341	0.11575	0.11192
																						0.222302	0.046347	0.312758	0.2344		137.41	0.325583	0.303611	0.102124	0.10895	0.101662	0.0709254	0.118579	0.115162
																						0.086811	0.131457	0.105524	0.063822		137.62	0.328165	0.303842	0.105715	0.103909	0.102064	0.0726001	0.111825	0.114854
																						0.025962	0.222466	0.083275	0.067303		137.8	0.329318	0.305924	0.102989	0.105976	0.102413	0.0711146	0.11633	0.114889
																						0.137925	0.203927	0.045134	0.060341		138.01	0.32872	0.30746	0.104342	0.105381	0.104645	0.0714273	0.117025	0.115471
																						0.22717	0.031179	0.764732	0.034812		138.21	0.328983	0.308305	0.10378	0.106131	0.0999942	0.0706884	0.121116	0.116095
																						0.043811	0.027808	0.033056	0.218155		138.41	0.330374	0.308601	0.106752	0.109535	0.101984	0.0719129	0.117857	0.113679
																						0.075453	0.04719	0.104889	0.207711		138.62	0.328327	0.307444	0.10523	0.111173	0.103819	0.0724115	0.116747	0.11332
																						0.270981	0.07247	1.10038	0.031331		138.82	0.332301	0.310521	0.0991459	0.110585	0.101311	0.0727884	0.116611	0.117847
																						0.066528	0.224151	0.302587	0.102115		139.01	0.332724	0.310721	0.10261	0.113158	0.1062	0.0705588	0.121017	0.119878
																						0.043	0.03455	0.731676	0.317949		139.19	0.328107	0.309612	0.108537	0.109652	0.101182	0.0735932	0.119075	0.116172
																						0.086811	0.048875	0.025428	0.062661		139.41	0.333378	0.309845	0.105732	0.1122	0.104013	0.0704353	0.120933	0.117288
																						0.047868	0.053931	0.031149	1.28804		139.61	0.331004	0.311017	0.102287	0.112194	0.107051	0.0725638	0.120317	0.115888
																						0.167132	0.139884	1.23578	0.236721		139.82	0.331742	0.312586	0.10479	0.112576	0.106201	0.0720867	0.122017	0.118991
																						0.081132	0.046347	0.416375	0.119521		140.01	0.331301	0.31275	0.106245	0.111026	0.106861	0.0756366	0.119858	0.115227
																						0.042189	0.030336	0.44371	0.02785		140.21	0.332058	0.313505	0.105267	0.113899	0.103703	0.0730258	0.120748	0.119303
																						0.032453	0.091851	0.043227	0.032491		140.41	0.332994	0.3114	0.109248	0.11397	0.104534	0.0764378	0.118655	0.122115
																						0.120076	0.081739	0.039413	0.843609		140.61	0.331733	0.314154	0.107244	0.114149	0.103308	0.0749217	0.122495	0.121956
																						0.06166	0.180332	1.10165	0.033652		140.82	0.332651	0.312403	0.104516	0.109182	0.106674	0.0749005	0.123248	0.117963
																						0.082755	0.206455	0.375056	0.178701		141.02	0.334555	0.31607	0.106678	0.114493	0.112999	0.0747686	0.122914	0.122241
																						0.187415	0.033707	0.052762	0.067303		141.21	0.331863	0.31495	0.105936	0.114808	0.103785	0.0726911	0.125728	0.12189
																						0.260434	0.098593	0.385227	0.02785		141.41	0.337037	0.317702	0.106687	0.11398	0.106388	0.0739046	0.121632	0.12176
																						0.599566	0.131457	0.091539	1.18244		141.61	0.339133	0.319612	0.110182	0.115245	0.105037	0.0767785	0.123289	0.119419
																						0.038132	0.102806	0.567033	1.53172		141.81	0.330959	0.318534	0.107849	0.114981	0.111382	0.0784653	0.123046	0.122205
																						0.199585	0.049718	0.85055	0.077747		142	0.337508	0.320069	0.109602	0.11454	0.106599	0.076636	0.121926	0.121697
																						0.705038	0.029494	1.27519	0.026689		142.22	0.336823	0.320913	0.111646	0.113115	0.105128	0.0791068	0.121845	0.123638
																						0.233661	0.041291	0.13858	0.61385		142.41	0.33873	0.319028	0.111623	0.115087	0.106041	0.0795969	0.121851	0.118529
																						0.043811	0.10702	0.078825	0.035972		142.59	0.337545	0.321333	0.111284	0.116785	0.110074	0.0759597	0.126417	0.121716
																						0.038943	0.036235	0.123959	0.039453		142.81	0.339899	0.323475	0.111965	0.115169	0.110033	0.0798693	0.127735	0.119638
																						0.028396	0.02528	0.055305	0.044095		143.02	0.341899	0.321603	0.109567	0.115257	0.105309	0.0757234	0.124224	0.124771
																						0.081943	0.133143	0.078825	0.164776		143.22	0.337068	0.325611	0.112282	0.117499	0.109882	0.0776368	0.125948	0.128376
																						0.114396	0.055616	0.233933	0.064982		143.41	0.340136	0.322511	0.112714	0.115874	0.112206	0.0768089	0.12961	0.121764
																						0.223925	0.051403	0.068654	0.14737		143.61	0.340804	0.324521	0.111376	0.118834	0.111559	0.0793624	0.126829	0.122247
																						0.026774	0.039606	0.12968	0.05918		143.81	0.342725	0.326439	0.114899	0.115805	0.10979	0.0786563	0.125169	0.122608
																						0.075453	0.060673	0.026063	0.02785		144.01	0.342368	0.325779	0.115516	0.117126	0.107684	0.07762	0.127235	0.12613
																						0.039755	0.033707	0.102346	0.038293		144.22	0.342605	0.326743	0.110711	0.117248	0.110183	0.0779482	0.126201	0.124705
																						0.425944	0.069099	0.046405	0.02901		144.42	0.343656	0.329348	0.113458	0.118521	0.108913	0.0803679	0.12457	0.126887
																						0.048679	0.03792	0.04132	0.042935		144.61	0.343947	0.327775	0.111518	0.120594	0.109055	0.0762757	0.122156	0.125097
																						0.050302	0.02528	0.076918	0.026689		144.81	0.337427	0.326444	0.111409	0.116072	0.112889	0.0740866	0.128952	0.123565
																						0.149283	0.096065	0.076918	0.031331		145.01	0.339223	0.327198	0.114959	0.124088	0.109459	0.0753985	0.130578	0.127806
																						0.171189	0.314317	0.081368	0.096313		145.21	0.347068	0.326309	0.112523	0.119259	0.11152	0.0797348	0.127763	0.125426
																						0.053547	0.075841	0.066747	0.054539		145.42	0.345464	0.329262	0.112613	0.122393	0.112541	0.0785374	0.12834	0.123258
																						0.02434	0.038763	0.038141	0.045255		145.6	0.346014	0.330015	0.114348	0.119368	0.107708	0.0807018	0.127142	0.127994
																						0.117642	0.02528	0.052762	0.155493		145.81	0.342304	0.328315	0.116061	0.118955	0.11242	0.0785317	0.126563	0.127169
																						0.028396	0.541839	0.04132	0.040614		146.01	0.34582	0.330911	0.115269	0.119874	0.116111	0.0770685	0.129071	0.125301
																						0.052736	0.053088	0.076283	0.093992		146.21	0.34688	0.328898	0.11694	0.120833	0.113681	0.0815411	0.127491	0.126146
																						0.034075	0.069942	0.074375	0.075426		146.42	0.346362	0.330966	0.115201	0.123805	0.107476	0.0778945	0.132673	0.125637
																						0.246642	0.03792	0.054033	0.062661		146.62	0.346827	0.330271	0.116676	0.120384	0.111778	0.0817792	0.130373	0.125598
																						0.084377	0.043819	0.04577	0.026689		146.81	0.344341	0.333549	0.116515	0.122255	0.116595	0.077961	0.127963	0.13025
																						0.037321	0.053931	0.038141	0.051057		147.01	0.345428	0.33471	0.116471	0.125401	0.113114	0.0807478	0.124729	0.129588
																						0.060849	0.04719	0.33755	0.098634		147.21	0.347209	0.333512	0.113213	0.121158	0.117431	0.0802567	0.132104	0.1249
																						0.039755	0.152524	0.040684	0.03888		147.41	0.350428	0.336022	0.116019	0.12218	0.11558	0.0797421	0.128758	0.130546
																						0.445415	0.124716	0.087725	0.044435		147.62	0.348556	0.337809	0.114633	0.12323	0.114125	0.0805916	0.128674	0.130936
																						0.053547	0.066571	0.06484	0.044435		147.82	0.349984	0.338379	0.115349	0.121275	0.114946	0.075156	0.134055	0.130478
																						0.040566	0.051403	0.108703	0.055544		148.01	0.345918	0.333523	0.117072	0.124365	0.113655	0.0773109	0.129119	0.12804
																						0.033264	0.040448	0.024792	0.035178		148.21	0.349093	0.337945	0.113164	0.124815	0.113387	0.0789534	0.134473	0.129839
																						0.032453	0.068257	0.054669	0.037029		148.41	0.349526	0.332424	0.120841	0.123671	0.114891	0.0802889	0.131308	0.131536
																						0.046245	0.054774	0.090268	0.046286		148.62	0.350866	0.33852	0.119383	0.127583	0.117414	0.0838423	0.130627	0.131036
																						0.068962	0.032864	0.029242	0.024069		148.8	0.353344	0.336851	0.120789	0.126113	0.118141	0.0856282	0.132203	0.131628
																						0.61985	0.108705	0.124595	0.072207		149.01	0.352364	0.335953	0.121736	0.124937	0.115615	0.0824062	0.131509	0.131516
																						0.084377	0.024438	0.153836	0.055544		149.21	0.347257	0.337893	0.117397	0.125278	0.115014	0.0819158	0.133085	0.134273
																						0.043177	0.033707	0.050219	0.027772		149.41	0.350047	0.341462	0.1212	0.124638	0.11875	0.081153	0.131437	0.12743
																						0.059297	0.029494	0.273346	0.055544		149.61	0.350894	0.341814	0.116624	0.123096	0.119381	0.0760314	0.136496	0.130828
																						0.046631	0.058144	0.074375	0.03888		149.82	0.351183	0.340674	0.117808	0.127708	0.118938	0.0806044	0.133168	0.130013
																						0.054115	0.037078	0.189435	0.046286		150.02	0.350191	0.339332	0.117916	0.127023	0.118596	0.0865338	0.135942	0.133317
																						0.046056	0.076683	0.519993	0.035178		150.21	0.351971	0.340524	0.119615	0.127802	0.118507	0.0826604	0.133526	0.13203
																						0.055267	0.135671	0.135402	0.070355		150.41	0.35292	0.34253	0.118149	0.125618	0.11545	0.0847527	0.133351	0.131048
																						0.028785	0.096907	0.069926	0.090721		150.61	0.3498	0.342432	0.123014	0.127005	0.12035	0.0786683	0.133399	0.134067
																						0.03339	0.081739	0.109974	0.059246		150.82	0.352212	0.342406	0.118185	0.129364	0.117954	0.0806929	0.13421	0.130859
																						0.051813	0.058987	0.035599	0.074058		151.02	0.353728	0.347231	0.120204	0.12635	0.115951	0.0811487	0.133748	0.132728
																						0.077143	0.155052	0.109342	0.044435		151.21	0.354913	0.341362	0.121117	0.129136	0.118837	0.0827584	0.137173	0.135466
																						0.051237	0.037078	0.04275	0.037029		151.41	0.352853	0.344138	0.117014	0.128251	0.121789	0.0849622	0.134883	0.130281
																						0.030512	0.070785	0.05837	0.031475		151.61	0.354859	0.346527	0.121848	0.12655	0.122274	0.08516	0.132873	0.129674
																						0.025906	0.030336	0.145515	0.112939		151.81	0.359305	0.347898	0.122114	0.128304	0.118944	0.0817784	0.136018	0.135057
																						0.070811	0.085953	0.51629	0.098127		152.02	0.353745	0.345702	0.123166	0.129743	0.120679	0.0811374	0.136746	0.131397
																						0.047207	0.05983	0.051793	0.096275		152.22	0.355728	0.345092	0.123338	0.1248	0.122233	0.0844024	0.138003	0.135338
																						0.081749	0.064043	0.028774	0.490634		152.41	0.35516	0.343822	0.120361	0.129705	0.121866	0.0854425	0.136075	0.13064
																						0.039723	0.091851	0.056726	0.266609		152.61	0.357282	0.347992	0.118237	0.128607	0.12508	0.0834938	0.138942	0.134171
																						0.058721	0.048032	0.243347	0.148116		152.81	0.354366	0.348145	0.120677	0.13007	0.121802	0.0839742	0.135798	0.132462
																						0.04548	0.156737	0.286097	0.055544		153.01	0.354708	0.350294	0.121885	0.129973	0.12171	0.0811715	0.140296	0.134445
																						0.052388	0.082582	0.393794	0.061098		153.22	0.355906	0.344841	0.124166	0.129631	0.120949	0.0824212	0.135932	0.135283
																						0.075416	0.090166	0.755526	0.064801		153.4	0.357521	0.349052	0.125187	0.1295	0.11948	0.0850066	0.13633	0.136935
																						0.081173	0.044662	0.131539	0.211065		153.61	0.35654	0.349431	0.126257	0.127419	0.123577	0.0845675	0.136894	0.133585
																						0.042026	0.075841	1.74864	0.035178		153.81	0.358869	0.349504	0.117125	0.129018	0.118411	0.0826766	0.137967	0.132021
																						0.066205	0.02528	0.045216	0.079612		154.01	0.356383	0.34989	0.119771	0.131461	0.119888	0.0823874	0.136419	0.137466
																						0.043177	0.030336	0.381462	0.02592		154.22	0.356764	0.348727	0.12575	0.129912	0.120941	0.0845874	0.135087	0.135274
																						0.046056	0.066571	0.087144	0.120344		154.42	0.359227	0.350417	0.120168	0.132312	0.121906	0.0847725	0.136769	0.136872
																						0.13644	0.07247	0.549997	0.112939		154.61	0.357764	0.351707	0.125525	0.132934	0.124351	0.0847376	0.136122	0.135513
																						0.102474	0.173591	0.092077	0.035178		154.81	0.358325	0.351256	0.123861	0.12906	0.120849	0.0860063	0.134692	0.137535
																						0.051813	0.05056	0.122496	0.072207		155.01	0.355677	0.349367	0.122191	0.131893	0.124488	0.0811792	0.137632	0.13722
																						0.035693	0.055616	0.707021	0.044435		155.21	0.357301	0.349605	0.126089	0.134501	0.122552	0.0872801	0.138732	0.134315
																						0.03339	0.031179	0.02713	0.090721		155.42	0.363409	0.353899	0.124633	0.131321	0.123784	0.0880736	0.138692	0.133905
																						0.073689	0.048032	0.036995	0.512852		155.6	0.363415	0.351402	0.124271	0.129773	0.121561	0.086699	0.141247	0.135128
																						0.201494	0.044662	0.878021	0.390656		155.81	0.364119	0.352307	0.125599	0.13372	0.120934	0.0842459	0.142037	0.138485
																						0.222219	0.168535	0.08139	0.059246		156.01	0.36376	0.352001	0.126526	0.135564	0.120524	0.0865516	0.137442	0.137284
																						0.080022	0.029494	0.024664	0.059246		156.2	0.365054	0.35274	0.125966	0.134515	0.127568	0.089663	0.139882	0.138527
																						0.093263	0.038763	0.10112	0.340667		156.42	0.356587	0.352192	0.127977	0.131209	0.124208	0.0864455	0.140113	0.135743
																						0.086354	0.05056	0.047683	0.037029		156.62	0.361195	0.354062	0.129722	0.13356	0.124832	0.0851163	0.144061	0.140516
																						0.044329	0.05056	0.030418	0.083315		156.81	0.362275	0.353968	0.125544	0.136541	0.121692	0.08617	0.141019	0.137016
																						0.030512	0.075841	0.462852	0.046286		157.01	0.366057	0.358925	0.126243	0.1356	0.124707	0.0869077	0.143448	0.14109
																						0.044904	0.054774	0.050971	0.346221		157.21	0.362179	0.353987	0.124515	0.135667	0.125679	0.0864102	0.135924	0.135688
																						1.02934	0.030336	0.127428	0.585058		157.41	0.35757	0.356624	0.125286	0.132448	0.123672	0.0873635	0.139959	0.135814
																						0.028785	0.037078	0.170178	0.042583		157.62	0.366126	0.35945	0.122677	0.132864	0.125751	0.0860777	0.141585	0.13782
																						0.038572	0.03792	0.351044	0.466565		157.82	0.363555	0.359951	0.124336	0.131533	0.12607	0.0910634	0.142953	0.138409
																						0.050661	0.100278	1.30634	0.196254		158.01	0.366399	0.357698	0.127186	0.131418	0.125881	0.087123	0.144569	0.139563
																						0.327571	0.053088	0.240058	0.079612		158.21	0.362733	0.353479	0.125077	0.130561	0.123389	0.0883293	0.139445	0.139179
																						0.074265	0.061515	0.077279	0.188848		158.41	0.363903	0.354308	0.126937	0.137345	0.129531	0.0907283	0.142093	0.141364
																						0.054691	0.042976	0.080568	0.049989		158.61	0.360831	0.362732	0.130592	0.132452	0.124743	0.0865496	0.143549	0.137803
																						0.464011	0.101121	0.133183	0.092573		158.82	0.361738	0.362203	0.129348	0.134325	0.118375	0.0884117	0.139169	0.140319
																						1.02244	0.184546	0.175111	0.03888		159.01	0.362873	0.358404	0.129702	0.136412	0.128459	0.0933709	0.136977	0.140678
																						0.189404	0.124716	0.067414	0.055544		159.21	0.363876	0.36291	0.128413	0.136021	0.126472	0.0876554	0.146024	0.141607
																						0.390322	0.064043	0.388862	0.079612		159.41	0.365641	0.359963	0.127959	0.136945	0.127885	0.0894131	0.145355	0.136205
																						0.028209	0.083425	0.549997	0.214768		159.61	0.364034	0.361293	0.127607	0.132399	0.124861	0.0858464	0.137456	0.139827
																						0.047783	0.024438	0.60179	0.20366		159.82	0.365852	0.359619	0.131844	0.132436	0.125862	0.0857625	0.142174	0.135307
																						0.062175	0.046347	0.630564	0.037029		160.02	0.363544	0.359208	0.129856	0.13764	0.126496	0.0872128	0.141635	0.141247
																						0.613116	0.055616	0.412703	0.079612		160.21	0.363324	0.360668	0.127349	0.138559	0.12798	0.087537	0.142602	0.14491
																						0.025331	0.051403	0.378174	0.053692		160.41	0.367535	0.364593	0.133657	0.135944	0.123178	0.0876943	0.141917	0.140285
																						0.122048	0.045504	0.046039	0.107384		160.61	0.368014	0.361018	0.131287	0.135918	0.128914	0.086534	0.144167	0.140669
																						0.03742	0.036235	0.079745	0.272163		160.82	0.368165	0.360373	0.133237	0.137068	0.1308	0.0891876	0.142259	0.139456
																						0.217037	0.118817	0.886243	0.051841		161.02	0.36442	0.361925	0.129258	0.137792	0.13348	0.0899335	0.143813	0.143393
																						0.109958	0.085953	0.036173	0.02592		161.22	0.363525	0.366136	0.13531	0.136369	0.123648	0.0916194	0.143148	0.146554
																						0.571666	0.051403	0.061659	0.38325		161.41	0.367474	0.362038	0.130743	0.133865	0.125565	0.0906014	0.143895	0.141069
																						0.055267	0.042976	0.942147	0.033326		161.61	0.368328	0.364787	0.133376	0.137255	0.128169	0.0912971	0.143225	0.144362
																						0.420834	0.112076	0.032885	0.02592		161.8	0.369458	0.362639	0.127892	0.137774	0.128601	0.0883339	0.144141	0.144697
																						0.044329	0.036235	0.12414	0.107384		162.02	0.367658	0.363973	0.133948	0.138598	0.129116	0.088658	0.144639	0.141259
																						0.038572	0.033707	0.072346	0.340667		162.22	0.366722	0.364245	0.130486	0.137184	0.13009	0.0938068	0.149279	0.143083
																						0.777189	0.129772	0.036995	0.15367		162.41	0.368819	0.368612	0.129498	0.13658	0.127464	0.0894424	0.147917	0.145816
																						0.783522	0.038763	0.145515	0.516555		162.61	0.36971	0.364783	0.130002	0.135085	0.127012	0.0878907	0.143678	0.14253
																						0.039723	0.1323	1.69192	0.029623		162.81	0.371245	0.3638	0.129195	0.140639	0.128623	0.0907719	0.144252	0.140016
																						0.065629	0.052246	0.055904	0.074058		163.01	0.37094	0.366825	0.13536	0.138461	0.129988	0.0897741	0.143706	0.142987
																						0.637871	0.198028	0.060837	0.179591		163.22	0.371032	0.364559	0.130423	0.136791	0.131857	0.0938888	0.147094	0.141678
																						0.370172	0.032022	0.032885	0.174036		163.42	0.366938	0.363915	0.130042	0.138776	0.132696	0.0893069	0.142343	0.143128
																						0.207251	0.100278	0.167712	0.053692		163.61	0.367895	0.364856	0.131378	0.141698	0.128539	0.0893799	0.145373	0.144907
																						0.075416	0.044662	0.036173	0.118493		163.81	0.368123	0.364953	0.134386	0.14085	0.133876	0.0904866	0.146152	0.14205
																						0.1658	0.053931	0.025486	0.35733		164.01	0.373991	0.370171	0.130673	0.13921	0.131336	0.0934226	0.146041	0.142877
																						0.043177	0.064043	0.111808	1.08495		164.22	0.374581	0.370164	0.134701	0.138456	0.129645	0.0891177	0.147767	0.142309
																						0.260215	0.026123	0.049327	0.037029		164.42	0.372199	0.36665	0.1324	0.142464	0.130311	0.0904081	0.149128	0.147609
																						0.389746	0.074155	0.061659	0.03888		164.61	0.370821	0.364951	0.131619	0.141286	0.131541	0.092024	0.144222	0.145002
																						0.113412	0.074155	0.064683	0.042583		164.81	0.372181	0.368002	0.132165	0.137716	0.132521	0.0919171	0.148769	0.145377
																						0.042026	0.030336	0.213871	0.044435		165.01	0.374942	0.37345	0.13644	0.138579	0.131563	0.08807	0.148496	0.14525
																						0.325268	0.104625	0.053207	0.686888		165.21	0.373684	0.369816	0.133154	0.142204	0.129691	0.0917387	0.148686	0.143216
																						0.146227	0.025643	0.053207	0.129602		165.42	0.373036	0.370976	0.13659	0.137942	0.133134	0.0872678	0.145183	0.146511
																						0.291302	0.160015	0.064683	0.053692		165.62	0.372291	0.36949	0.133594	0.139955	0.129285	0.0907081	0.146257	0.141852
																						0.293029	0.066673	0.088678	0.051841		165.81	0.372591	0.371459	0.131908	0.139992	0.128174	0.087978	0.150242	0.144957
																						0.031663	0.118986	0.058423	0.079612		166.01	0.371864	0.372095	0.136168	0.140887	0.132086	0.093877	0.147326	0.148947
																						0.04548	0.034875	0.215957	0.033326		166.21	0.372645	0.372019	0.135122	0.139692	0.130935	0.0916316	0.146216	0.14379
																						0.032239	0.052313	0.082418	0.061098		166.41	0.385479	0.370538	0.136505	0.13878	0.132482	0.0927083	0.147522	0.145158
																						0.062175	0.038978	0.030255	0.051841		166.62	0.396525	0.370575	0.135949	0.144251	0.134702	0.0934925	0.149362	0.148868
																						0.244095	0.029746	0.023995	0.064801		166.82	0.402523	0.371407	0.135549	0.138171	0.13009	0.092169	0.149178	0.142519
																						0.035693	0.04821	0.092851	0.049989		167.01	0.398537	0.37117	0.131043	0.140333	0.134515	0.0966139	0.147536	0.143897
																						0.040299	0.033849	0.189875	0.057395		167.21	0.39954	0.374993	0.132676	0.142635	0.128889	0.0916264	0.148867	0.145915
																						0.361537	0.026669	0.038601	0.046286		167.41	0.396856	0.373819	0.13339	0.143076	0.131259	0.0902096	0.148943	0.147765
																						0.039147	0.044107	0.026082	0.053692		167.62	0.400985	0.376365	0.136243	0.140836	0.131447	0.0908279	0.149053	0.147313
																						0.223946	0.08411	0.06051	0.161076		167.82	0.400617	0.372874	0.133057	0.143456	0.133221	0.0942679	0.147564	0.148931
																						0.092687	0.141552	0.128322	1.39414		167.99	0.398567	0.375326	0.133443	0.142434	0.133823	0.0916918	0.147088	0.149206
																						0.151984	0.128217	0.031298	0.222174		168.21	0.397657	0.373341	0.137761	0.142489	0.135262	0.0962358	0.148882	0.1468
																						0.121472	0.092316	0.351582	1.28491		168.41	0.398939	0.374353	0.13189	0.144843	0.134061	0.0933311	0.152024	0.145686
																						0.071962	0.144629	0.039644	0.02592		168.6	0.395631	0.372952	0.13444	0.146588	0.133834	0.0924182	0.150392	0.149682
																						0.042601	0.074879	0.427741	0.249946		168.82	0.400605	0.372607	0.137679	0.146909	0.137201	0.0903152	0.148355	0.146525
																						0.024755	0.097445	0.028168	0.033326		169.02	0.40094	0.372263	0.134825	0.142035	0.132334	0.0928479	0.146093	0.149184
																						0.147954	0.137449	0.067813	0.398062		169.21	0.402653	0.377699	0.135631	0.143705	0.134391	0.0950201	0.149298	0.153278
																						0.051237	0.044107	0.155447	0.368439		169.41	0.40167	0.378899	0.134307	0.14477	0.134595	0.0907811	0.152142	0.148517
																						0.063902	0.097445	0.726116	0.294381		169.61	0.399487	0.377722	0.137496	0.145709	0.133664	0.093017	0.152371	0.148291
																						0.030512	0.044107	0.05425	0.059246		169.82	0.398835	0.376663	0.13896	0.144856	0.134065	0.0954622	0.151349	0.14701
																						0.202645	0.215405	0.156491	1.15901		170.02	0.399492	0.375296	0.136628	0.142103	0.133734	0.0940834	0.148509	0.148068
																						0.02936	0.208225	0.069899	0.031475		170.21	0.397598	0.379812	0.139847	0.142329	0.131431	0.0900666	0.151641	0.146932
																						0.310876	0.038978	1.07874	0.253649		170.41	0.398629	0.375864	0.139332	0.141449	0.132466	0.0910383	0.150977	0.141832
																						0.035117	0.045132	0.062596	0.218471		170.61	0.401632	0.377817	0.139652	0.145677	0.134489	0.0942376	0.150412	0.150369
																						0.070235	0.025643	0.037558	0.044435		170.81	0.3991	0.380959	0.136445	0.145487	0.135508	0.09606	0.153455	0.149861
																						0.112836	0.036927	0.084505	0.048138		171.02	0.40024	0.380085	0.140871	0.144908	0.132711	0.0942627	0.152555	0.148076
																						0.240641	0.041029	1.65254	0.029623		171.22	0.400688	0.378914	0.140097	0.146329	0.136297	0.0947871	0.150344	0.147338
																						0.028209	0.045132	0.093894	0.035178		171.41	0.401643	0.377714	0.13723	0.146436	0.138315	0.0933011	0.152395	0.146727
																						0.313179	0.042055	0.116846	0.051841		171.61	0.402396	0.374513	0.141741	0.142678	0.13517	0.0952385	0.149569	0.15063
																						0.172133	0.029746	0.128322	0.559138		171.81	0.401949	0.381352	0.139211	0.142185	0.134982	0.0925883	0.152695	0.148514
																						0.31433	0.029746	0.141885	0.092573		172.02	0.403014	0.379951	0.139861	0.144085	0.134856	0.0940146	0.149846	0.148673
																						0.461708	0.064621	0.031298	0.046286		172.22	0.379646	0.379139	0.140163	0.143104	0.136799	0.0933064	0.150993	0.153059
																						0.032239	0.167195	0.487207	0.45916		172.41	0.376708	0.379345	0.140519	0.148327	0.133611	0.094806	0.154082	0.14938
																						0.036845	0.051287	0.275423	0.072207		172.61	0.376176	0.383604	0.139438	0.143953	0.13959	0.0954591	0.149263	0.147046
																						0.134137	0.179504	0.149188	0.355478		172.81	0.380944	0.385391	0.138455	0.143539	0.133383	0.0943303	0.151421	0.148897
																						0.247549	0.054364	0.529982	0.031475		173.01	0.380932	0.382035	0.134961	0.145271	0.133962	0.0982939	0.156678	0.150945
																						0.03339	0.050261	0.058423	0.275866		173.22	0.377843	0.378153	0.13968	0.144207	0.136072	0.0981026	0.152897	0.153161
																						0.036845	0.053338	0.036514	0.320301		173.42	0.380424	0.383028	0.139964	0.145695	0.136626	0.0930023	0.153353	0.148271
																						0.043177	0.044107	1.02241	0.083315		173.61	0.38056	0.380338	0.14053	0.148361	0.137018	0.0963635	0.153924	0.148454
																						0.028209	0.027695	1.06309	0.027772		173.81	0.38198	0.383742	0.142414	0.14591	0.137758	0.0915895	0.157365	0.155372
																						0.107655	0.175401	0.182572	0.120344		174.01	0.376644	0.388465	0.140377	0.145804	0.136762	0.0938664	0.153508	0.151743
																						0.10305	0.051287	0.078245	0.044435		174.21	0.380643	0.383863	0.140701	0.148179	0.136208	0.0944704	0.154917	0.148409
																						0.024179	0.098471	0.074072	0.033326		174.42	0.37738	0.384727	0.139313	0.145186	0.136631	0.0957293	0.150256	0.149457
																						0.096141	0.026669	0.488251	0.464714		174.6	0.378727	0.382965	0.137667	0.147403	0.140344	0.0971723	0.153717	0.152006
																						0.142197	0.025643	0.509116	0.070355		174.81	0.38205	0.381756	0.14212	0.148218	0.137602	0.0950227	0.152776	0.152025
																						0.029936	0.050261	0.041731	0.590613		175.01	0.379189	0.384104	0.135301	0.144611	0.135195	0.0977993	0.155951	0.152591
																						0.032815	0.025643	0.090765	0.059246		175.21	0.377691	0.386025	0.141609	0.150455	0.138043	0.0966052	0.152531	0.148298
																						0.026482	0.083085	0.617616	0.079612		175.4	0.381042	0.383826	0.13717	0.142374	0.137592	0.0980789	0.155534	0.154646
																						0.037996	0.042055	0.189875	1.18863		175.62	0.38153	0.385976	0.140346	0.147691	0.139658	0.100079	0.151712	0.153686
																						0.027058	0.024618	0.039644	0.590613		175.81	0.382525	0.38464	0.140607	0.146624	0.13873	0.0942749	0.150777	0.148937
																						0.079385	0.027695	0.118933	0.059246		175.99	0.378792	0.384468	0.136535	0.144562	0.135736	0.0952431	0.152165	0.155522
																						0.057058	0.07693	0.05425	0.061098		176.21	0.3824	0.388787	0.139989	0.150877	0.137077	0.0924687	0.155086	0.155167
																						0.201769	0.088213	0.049034	0.048138		176.41	0.385268	0.389095	0.144101	0.150754	0.137916	0.0970527	0.157491	0.152879
																						0.029769	0.041029	0.078245	0.087018		176.62	0.38304	0.386413	0.140986	0.149532	0.13846	0.0962533	0.155135	0.153139
																						0.090135	0.043081	0.037558	0.03888		176.8	0.381851	0.383687	0.140576	0.149616	0.138083	0.0970552	0.15616	0.157349
																						0.324981	0.051287	0.034428	0.033326		176.99	0.380848	0.387153	0.143478	0.149827	0.138578	0.0966256	0.154255	0.154442
																						0.071942	0.072827	0.265484	0.112939		177.21	0.382319	0.387966	0.14275	0.148879	0.138009	0.0969768	0.151582	0.155219
																						0.042173	0.112831	0.042736	0.259203		177.41	0.382949	0.391338	0.142985	0.150548	0.141615	0.094087	0.154263	0.155545
																						0.036385	0.027695	0.062162	0.049989		177.62	0.388193	0.387745	0.145514	0.148591	0.140799	0.0957284	0.153932	0.155858
																						0.035558	0.024618	0.024606	0.164779		177.82	0.386536	0.389117	0.139846	0.148876	0.140728	0.0936362	0.155059	0.151349
																						0.358885	0.030772	0.134037	0.031475		178.01	0.384407	0.389245	0.139542	0.148029	0.140126	0.0929962	0.155171	0.152251
																						0.023981	0.04821	0.393045	0.02592		178.21	0.383689	0.39063	0.140666	0.150373	0.136613	0.0995525	0.155711	0.152088
																						0.068635	0.093342	0.22728	0.079612		178.41	0.385623	0.388425	0.142916	0.150206	0.142657	0.095134	0.153471	0.156687
																						0.041346	0.058467	0.042089	0.098127		178.61	0.384873	0.385588	0.143832	0.153146	0.139141	0.0964242	0.156102	0.155735
																						0.052923	0.096419	0.032376	0.035178		178.82	0.383223	0.389247	0.142188	0.149927	0.138128	0.0969181	0.15565	0.151181
																						0.074423	0.120011	0.055039	0.172185		179	0.386306	0.390203	0.137099	0.14685	0.144208	0.0993413	0.160983	0.154821
																						0.043827	0.072827	0.090005	0.055544		179.21	0.387041	0.391176	0.141196	0.151241	0.145647	0.0949304	0.15663	0.153654
																						0.066981	0.161041	0.045326	0.029623		179.41	0.383872	0.392424	0.143007	0.152525	0.143457	0.0949741	0.155625	0.156709
																						0.023981	0.038978	0.048564	0.024069		179.61	0.383026	0.389523	0.145668	0.154725	0.141185	0.102616	0.157094	0.153271
																						0.235673	0.077956	0.123029	0.033326		179.82	0.386431	0.390457	0.146145	0.14944	0.142299	0.0941977	0.158873	0.1524
																						0.363846	0.115908	0.117849	0.02592		180.02	0.386021	0.396643	0.141536	0.151274	0.138967	0.0970429	0.157601	0.156434
																						0.083519	0.091291	0.050507	0.051841		180.21	0.385115	0.393524	0.142365	0.150081	0.14293	0.0958658	0.156026	0.155217
																						0.041346	0.306695	0.051802	0.046286		180.41	0.381674	0.394823	0.148054	0.148544	0.141144	0.0947407	0.157678	0.155466
																						0.402712	0.089239	0.422184	0.03888		180.61	0.388812	0.389387	0.145187	0.150598	0.142017	0.0952774	0.156164	0.157589
																						0.162904	0.065647	0.341891	0.040732		180.81	0.390035	0.396757	0.146501	0.150362	0.142248	0.0964565	0.160572	0.156458
																						0.186885	0.030772	0.099071	0.037029		181	0.388159	0.392007	0.147882	0.156829	0.143615	0.0970982	0.159589	0.157844
																						0.062846	0.211302	0.029138	0.048138		181.22	0.386875	0.393854	0.143967	0.154559	0.141197	0.0995483	0.154008	0.155635
																						0.030596	0.026669	0.112669	0.033326		181.41	0.385376	0.393099	0.147749	0.1495	0.141885	0.0977221	0.15933	0.157234
																						0.291904	0.11796	0.042089	0.085167		181.59	0.38491	0.393657	0.146074	0.149154	0.139861	0.0978735	0.152139	0.155116
																						0.029769	0.061544	0.15152	0.046286		181.81	0.385272	0.394336	0.14391	0.154508	0.14339	0.0991645	0.160851	0.155799
																						0.265442	0.047184	0.029786	0.072207		182.01	0.384703	0.394862	0.145304	0.15299	0.138489	0.096111	0.160057	0.150741
																						0.065327	0.103599	0.064752	0.062949		182.2	0.385065	0.395818	0.146695	0.151092	0.145651	0.101546	0.159394	0.158843
																						0.058712	0.046158	0.331531	0.02592		182.42	0.38597	0.393598	0.14606	0.153517	0.143602	0.102636	0.158869	0.155377
																						0.158769	0.038978	0.16706	0.14071		182.61	0.387567	0.395928	0.144934	0.152822	0.143915	0.100839	0.156673	0.155696
																						0.157942	0.040004	0.033671	0.024069		182.79	0.385887	0.399371	0.148117	0.151679	0.140964	0.100961	0.158465	0.157133
																						0.43	0.052313	0.133389	0.033326		183.01	0.387602	0.394426	0.144374	0.149437	0.144685	0.100033	0.15787	0.156706
																						0.212519	0.033849	0.066047	0.029623		183.22	0.386698	0.393056	0.142633	0.149914	0.142745	0.102277	0.157729	0.160661
																						0.326635	0.035901	0.955093	0.061098		183.42	0.384543	0.396935	0.145692	0.151064	0.141946	0.0975862	0.159972	0.15434
																						0.056231	0.321056	0.336711	0.03888		183.61	0.389944	0.397711	0.143535	0.154828	0.145609	0.0965456	0.162032	0.158387
																						0.301	0.063596	0.060867	0.046286		183.81	0.385034	0.398367	0.148484	0.155571	0.148028	0.100529	0.15367	0.160833
																						0.054577	0.123088	0.124972	0.079612		184.01	0.389603	0.395011	0.148183	0.154048	0.145874	0.0984478	0.156023	0.155712
																						0.26875	0.085136	0.062162	0.072207		184.21	0.388221	0.39666	0.147047	0.153547	0.151128	0.0984717	0.158056	0.156148
																						0.420077	0.050261	0.042089	0.222174		184.42	0.388667	0.397939	0.14696	0.156384	0.144311	0.0977865	0.161149	0.154844
																						0.047135	0.044107	0.039499	0.040732		184.62	0.392145	0.398933	0.149263	0.153512	0.147905	0.100965	0.154785	0.157335
																						0.106673	0.054364	0.170946	0.033326		184.81	0.389757	0.396429	0.145541	0.15545	0.143457	0.102119	0.158646	0.157989
																						0.057885	0.063596	0.053097	0.037029		185.01	0.388347	0.398511	0.146256	0.152689	0.143953	0.0990686	0.160172	0.15828
																						0.05375	0.409269	0.024606	0.061098		185.21	0.387023	0.397583	0.148785	0.157433	0.142014	0.0988767	0.161032	0.160735
																						0.048788	0.122063	0.029138	0.029623		185.42	0.386298	0.397601	0.149728	0.156136	0.145353	0.0991297	0.163515	0.160624
																						0.057885	0.024618	0.045974	0.03888		185.62	0.387691	0.402571	0.14798	0.155016	0.140341	0.101106	0.161236	0.157932
																						0.157942	0.109754	0.421536	0.053692		185.81	0.395172	0.400138	0.145466	0.156536	0.1434	0.101389	0.157626	0.158136
																						0.458942	0.099496	0.08353	0.051841		186.01	0.391368	0.400523	0.147366	0.151744	0.145334	0.100402	0.161107	0.157799
																						0.052096	0.026669	0.134037	0.029623		186.21	0.389793	0.399104	0.148867	0.156885	0.149763	0.098052	0.162142	0.157223
																						0.195154	0.040004	0.099718	0.049989		186.41	0.394042	0.398514	0.146379	0.15761	0.143392	0.100766	0.159147	0.158796
																						0.249731	0.147706	0.117201	0.094424		186.62	0.390094	0.401228	0.14864	0.155595	0.143533	0.102368	0.158083	0.15772
																						0.300173	0.030772	1.6188	0.048138		186.82	0.389253	0.400393	0.143789	0.155644	0.145846	0.102216	0.157141	0.160686
																						0.169519	0.098471	0.304982	0.024069		187.01	0.392068	0.399675	0.145805	0.155764	0.147728	0.0988348	0.158553	0.158906
																						0.052096	0.027695	0.044679	0.105533		187.21	0.392619	0.397642	0.148313	0.151324	0.146733	0.102786	0.161489	0.158854
																						0.105846	0.23592	0.041441	0.048277		187.41	0.392472	0.402308	0.146444	0.158117	0.145743	0.100944	0.16296	0.158599
																						0.039692	0.089239	0.055687	0.079959		187.61	0.390498	0.401648	0.149775	0.157351	0.147742	0.096669	0.157752	0.155745
																						0.074423	0.210276	0.037556	0.042242		187.8	0.393618	0.404409	0.143722	0.153293	0.144374	0.0996279	0.161312	0.157738
																						0.310923	0.165144	0.038851	0.034699		188.01	0.392417	0.398735	0.146079	0.158431	0.144862	0.10175	0.162142	0.156753
																						0.059538	0.241048	0.084178	0.046768		188.21	0.39278	0.404125	0.14931	0.154446	0.14821	0.0946038	0.162148	0.158042
																						0.047962	0.192839	1.14417	0.024138		188.39	0.392967	0.399566	0.148123	0.154511	0.149206	0.0979957	0.160568	0.162488
																						0.120731	0.193864	0.808754	0.085993		188.61	0.389658	0.401646	0.148209	0.155147	0.149126	0.103965	0.161545	0.160241
																						0.036385	0.041029	0.469453	0.070907		188.82	0.393244	0.402249	0.150767	0.158096	0.144853	0.0999539	0.161777	0.158666
																						0.062019	0.082059	0.124324	0.024138		189	0.388824	0.39985	0.150531	0.157282	0.143378	0.10226	0.16175	0.158496
																						0.078558	0.116934	0.07576	0.030173		189.21	0.389709	0.401453	0.152024	0.158397	0.149181	0.105309	0.163483	0.160654
																						0.079385	0.359008	0.026548	0.064872		189.41	0.388034	0.402329	0.147719	0.156376	0.14632	0.102713	0.161555	0.159753
																						0.097577	0.032824	0.248648	0.027156		189.61	0.390662	0.40084	0.15082	0.158797	0.148066	0.0971596	0.163751	0.161852
																						0.152981	0.095394	0.186486	0.03319		189.82	0.391712	0.402089	0.148794	0.159366	0.14635	0.101664	0.162785	0.156127
																						0.109154	0.037952	0.455207	0.05582		190.02	0.393222	0.405026	0.148042	0.152853	0.14702	0.103324	0.162793	0.159042
																						0.076077	0.198993	0.457797	0.049786		190.2	0.390307	0.404936	0.147801	0.157731	0.147658	0.100045	0.163629	0.16375
																						0.090135	0.033849	0.450675	0.049786		190.41	0.391861	0.401692	0.146344	0.156722	0.148864	0.102935	0.164076	0.161616
																						0.088481	0.106677	0.034319	0.039225		190.61	0.3942	0.404849	0.149257	0.162715	0.149122	0.106245	0.163862	0.161099
																						0.028646	0.046158	0.872211	0.117675		190.81	0.389632	0.401257	0.146401	0.155752	0.146505	0.100438	0.161761	0.160665
																						0.076389	0.056416	0.081588	0.132762		191.02	0.39156	0.401691	0.14778	0.158342	0.146158	0.0998026	0.163629	0.161364
																						0.160204	0.050261	0.953798	0.052803		191.22	0.398775	0.40127	0.150222	0.15805	0.150433	0.100892	0.161974	0.15838
																						0.137924	0.035901	1.48347	0.034699		191.41	0.392089	0.404102	0.148372	0.157137	0.150915	0.102078	0.165885	0.162395
																						0.039255	0.036927	0.038204	0.150866		191.61	0.393708	0.409143	0.150613	0.159589	0.148619	0.102554	0.168198	0.162675
																						0.050926	0.037952	0.037556	0.098063		191.81	0.39147	0.401933	0.153268	0.160973	0.147459	0.101419	0.161115	0.15987
																						0.092303	0.373368	0.224042	0.063364		192.01	0.393609	0.4075	0.150908	0.158027	0.147159	0.0998193	0.163455	0.164612
																						0.030768	0.095394	0.29268	0.082976		192.22	0.393416	0.407845	0.151804	0.156245	0.147589	0.101483	0.163218	0.165685
																						0.025463	0.13232	0.53032	0.170478		192.4	0.39622	0.405061	0.147125	0.157945	0.153051	0.102904	0.16426	0.16302
																						0.046682	0.086162	0.040146	0.043751		192.61	0.393289	0.404267	0.15065	0.158314	0.147291	0.103352	0.166474	0.158224
																						0.173996	0.06975	1.66607	0.099571		192.81	0.39409	0.405825	0.15018	0.157409	0.147747	0.101321	0.165896	0.15985
																						0.042438	0.037952	0.067342	0.104097		193.01	0.395282	0.403737	0.148312	0.155302	0.151461	0.106154	0.163982	0.16309
																						0.142168	0.035901	0.084178	0.036208		193.22	0.393707	0.406695	0.149088	0.156383	0.148707	0.103712	0.163256	0.160452
																						0.495465	0.075905	0.064752	0.049786		193.42	0.397044	0.408244	0.147674	0.160028	0.149562	0.101726	0.164056	0.163572
																						0.039255	0.111805	0.143102	0.034699		193.61	0.393782	0.401829	0.152171	0.157213	0.152337	0.109845	0.166514	0.158611
																						0.046682	0.042055	0.078998	0.034699		193.81	0.396739	0.409185	0.150557	0.157905	0.152343	0.101777	0.165349	0.164429
																						0.053048	0.031798	0.052449	0.076941		194.01	0.395618	0.406785	0.149394	0.16238	0.147696	0.104991	0.166732	0.163665
																						0.024402	0.050261	0.326998	0.058838		194.21	0.393193	0.410362	0.151257	0.159179	0.147858	0.107312	0.163909	0.162846
																						0.065779	0.049235	0.033024	0.070907		194.42	0.396687	0.40612	0.158045	0.158706	0.150711	0.0982012	0.16619	0.165132
																						0.620657	0.280026	0.124324	0.024138		194.6	0.389695	0.409183	0.153286	0.159224	0.149298	0.101795	0.164906	0.161847
																						0.098669	0.038978	0.339301	0.283627		194.81	0.393634	0.405964	0.152482	0.155701	0.145358	0.107194	0.163938	0.16066
																						0.34481	0.050261	0.367144	0.420915		195.01	0.394955	0.410573	0.153025	0.162273	0.150369	0.10414	0.167921	0.159282
																						0.540025	0.06975	0.062162	0.058838		195.2	0.392287	0.411181	0.155347	0.159568	0.149253	0.100928	0.164321	0.160332
																						0.058352	0.036927	0.081588	0.034699		195.41	0.396828	0.40949	0.152323	0.159883	0.148658	0.106025	0.166298	0.161429
																						0.076389	0.093342	0.042736	0.105606		195.62	0.39609	0.411151	0.154019	0.16162	0.15186	0.104659	0.166076	0.162648
																						0.354358	0.170272	0.040794	0.048277		195.8	0.394959	0.413769	0.153373	0.159819	0.149262	0.100504	0.16676	0.162565
																						0.266299	0.19489	0.026548	0.089011		196.01	0.396892	0.410419	0.151058	0.157777	0.146593	0.0980157	0.166495	0.163161
																						0.70129	0.073853	0.025901	0.034699		196.21	0.398209	0.408974	0.152372	0.162254	0.155715	0.105733	0.167384	0.165777
																						0.051987	0.033849	0.025253	0.20216		196.41	0.396609	0.409841	0.155598	0.157987	0.149349	0.10179	0.16788	0.161325
																						0.076389	0.115908	0.334121	0.054312		196.62	0.398613	0.404884	0.15406	0.159877	0.151612	0.101653	0.168319	0.164536
																						0.335261	0.284129	0.294622	0.031682		196.82	0.396373	0.412449	0.153017	0.15905	0.151715	0.101035	0.165734	0.167398
																						0.028646	0.072827	0.077703	0.066381		197.01	0.39498	0.412094	0.151943	0.162776	0.149404	0.101765	0.165527	0.165409
																						0.078511	0.025643	0.070677	0.110132		197.21	0.399383	0.410256	0.148324	0.161644	0.149409	0.10234	0.170437	0.160467
																						0.414833	0.040004	0.032239	0.559711		197.41	0.39737	0.409918	0.151301	0.16279	0.15484	0.101772	0.164604	0.165838
																						0.17824	0.034875	0.174833	0.042242		197.61	0.397935	0.40992	0.150871	0.166086	0.149887	0.100089	0.169443	0.163376
																						0.026524	0.59185	0.083077	0.209703		197.82	0.397784	0.409097	0.149044	0.159229	0.15246	0.108141	0.166055	0.162848
																						0.383004	0.06975	0.50218	0.054312		198.01	0.39759	0.412218	0.152985	0.158893	0.153059	0.105059	0.171519	0.164999
																						0.195215	0.046158	0.422823	0.147848		198.21	0.399637	0.412845	0.157312	0.15827	0.151611	0.103528	0.167872	0.167302
																						0.049865	0.04821	0.141355	0.131253		198.41	0.398539	0.414203	0.154473	0.16076	0.148158	0.1044	0.165942	0.16591
																						0.163387	0.031798	0.216992	0.042242		198.61	0.396295	0.408168	0.153352	0.161406	0.152072	0.104536	0.170285	0.16481
																						0.130497	0.042055	0.054558	0.069398		198.82	0.398484	0.411982	0.15705	0.163035	0.153662	0.106497	0.16787	0.16845
																						0.249324	0.097445	0.088037	0.024138		199.02	0.399581	0.409684	0.155405	0.163245	0.151823	0.102032	0.16504	0.166591
																						0.041377	0.032824	0.26411	0.054312		199.21	0.396779	0.412305	0.155018	0.163258	0.153669	0.103885	0.168363	0.167242
																						0.065779	0.026669	0.818368	0.03319		199.41	0.399074	0.409224	0.155887	0.163062	0.148956	0.106985	0.167586	0.166918
																						0.075328	0.030772	0.042158	0.076941		199.61	0.393573	0.412541	0.154098	0.164833	0.152805	0.102387	0.16677	0.167248
																						0.031829	0.103599	0.033479	0.13427		199.82	0.397468	0.414036	0.154373	0.163627	0.151774	0.105543	0.168505	0.165543
																						0.152777	0.057441	0.121515	0.485787		200.02	0.3938	0.412031	0.153852	0.162093	0.152671	0.1076	0.170732	0.161084
																						0.037133	0.031798	0.078117	0.030173		200.2	0.396076	0.414009	0.155958	0.162019	0.152673	0.100648	0.168654	0.166004
																						0.073206	0.025643	0.040918	0.024138		200.41	0.400469	0.412253	0.158639	0.162295	0.151947	0.104839	0.165225	0.16613
																						0.04456	0.260537	0.814648	0.368112		200.61	0.402349	0.413251	0.152762	0.16499	0.151051	0.107493	0.170357	0.165812
																						0.031829	0.258486	0.107876	0.657774		200.8	0.399255	0.41501	0.155041	0.164225	0.15456	0.104616	0.169708	0.163409
																						1.12779	0.025643	0.352146	0.063364		201.02	0.402381	0.413944	0.157716	0.165449	0.152747	0.107878	0.167938	0.168385
																						0.042438	0.127191	0.489781	0.075433		201.22	0.403864	0.415207	0.155546	0.164964	0.154004	0.10706	0.169353	0.167202
																						0.180362	0.051287	0.095476	0.025647		201.41	0.39812	0.412149	0.154961	0.163299	0.154088	0.10591	0.170495	0.163569
																						0.061535	0.099496	0.737771	0.360569		201.61	0.396586	0.413953	0.156481	0.165389	0.154052	0.109847	0.169296	0.165503
																						0.234471	0.031798	0.441423	0.168969		201.81	0.39946	0.415356	0.154631	0.16337	0.155693	0.106627	0.166992	0.164899
																						0.031829	0.031798	0.700573	0.042242		202	0.403646	0.414893	0.157439	0.16731	0.155265	0.100354	0.166947	0.162824
																						0.973955	0.04821	0.084317	0.034699		202.22	0.398519	0.418336	0.153316	0.164248	0.153612	0.106584	0.170584	0.164124
																						0.32253	0.089239	0.452582	0.046768		202.42	0.400266	0.417911	0.15635	0.162645	0.151351	0.106781	0.166159	0.166939
																						0.059413	0.120011	0.340987	0.049786		202.61	0.398156	0.41736	0.155901	0.161185	0.151011	0.106604	0.168265	0.166978
																						0.335261	0.068724	0.126475	0.049786		202.81	0.40385	0.415936	0.157336	0.166658	0.154571	0.105972	0.172998	0.164629
																						0.530476	0.038978	0.324867	0.218755		203.01	0.402055	0.417884	0.157258	0.161252	0.150947	0.105058	0.169833	0.166389
																						0.035011	0.114883	0.192193	0.242894		203.21	0.397678	0.418025	0.157806	0.163713	0.153955	0.105376	0.169832	0.168063
																						0.080632	0.094368	0.079357	0.046768		203.42	0.400001	0.412489	0.158116	0.167101	0.155534	0.108896	0.170436	0.166356
																						0.210069	0.033849	0.159954	0.054312		203.6	0.402268	0.420356	0.154152	0.16419	0.156205	0.108105	0.167554	0.166134
																						0.024402	0.089239	0.127715	0.218755		203.81	0.402732	0.424169	0.155777	0.167169	0.152411	0.107971	0.174609	0.167199
																						0.105034	0.078982	0.51582	0.856916		204.01	0.400551	0.412611	0.154922	0.165027	0.157585	0.111313	0.170804	0.171963
																						0.064718	0.130269	1.28955	0.046768		204.21	0.402453	0.418112	0.156516	0.165254	0.156169	0.104709	0.170888	0.169113
																						0.094425	0.025643	0.420344	0.104097		204.42	0.40367	0.418348	0.157947	0.163767	0.158539	0.107796	0.169996	0.167576
																						0.04456	0.027695	1.74709	0.034699		204.62	0.405205	0.417043	0.15761	0.167743	0.15676	0.101933	0.169569	0.165485
																						0.035011	0.145655	0.073157	0.037716		204.81	0.398397	0.416992	0.155113	0.166606	0.159983	0.108969	0.169202	0.166505
																						0.051987	0.129243	1.40115	0.028664		205.01	0.405953	0.416588	0.15485	0.166254	0.156096	0.108597	0.170027	0.167182
																						0.153838	0.040004	0.228151	0.058838		205.21	0.403535	0.418043	0.156787	0.16406	0.155664	0.10579	0.172373	0.170379
																						0.2228	0.107702	0.080597	0.064872		205.41	0.40288	0.418944	0.157257	0.164643	0.155443	0.106939	0.170705	0.166696
																						0.030768	0.215405	1.1358	0.188582		205.62	0.40059	0.420832	0.15749	0.168119	0.156978	0.104415	0.16979	0.167032
																						0.137924	0.19489	0.148794	0.170478		205.8	0.402126	0.420915	0.156784	0.163576	0.154423	0.107177	0.170993	0.169703
																						0.138985	0.095394	0.860526	0.138796		206.01	0.405109	0.419946	0.158183	0.161333	0.155399	0.107413	0.17147	0.169342
																						0.269482	0.025643	0.131435	0.187073		206.21	0.402559	0.417672	0.157405	0.165961	0.15446	0.107373	0.169219	0.167678
																						0.06684	0.036927	0.086797	0.066381		206.41	0.399048	0.419819	0.159086	0.165044	0.156793	0.104703	0.165771	0.166579
																						0.106095	0.073853	0.037199	0.328887		206.62	0.40452	0.420226	0.158057	0.163256	0.157865	0.104442	0.171993	0.168201
																						0.314042	0.050261	0.028519	0.111641		206.82	0.402064	0.421662	0.154943	0.167998	0.154718	0.107733	0.169767	0.170763
																						0.338444	0.190787	0.038438	0.048277		207.01	0.405816	0.422734	0.159741	0.167484	0.156769	0.107105	0.171308	0.168577
																						0.240836	0.030772	0.032239	0.040734		207.21	0.403374	0.421892	0.156097	0.164599	0.154289	0.109091	0.169244	0.174871
																						0.067901	0.028721	0.105396	0.10108		207.41	0.403962	0.420654	0.15834	0.167018	0.155118	0.108036	0.173511	0.171766
																						0.079571	0.256434	0.089277	0.036208		207.6	0.405267	0.421732	0.160071	0.168385	0.160398	0.106088	0.172454	0.168706
																						0.057291	0.07693	0.110356	0.111641		207.82	0.406284	0.421525	0.156608	0.164444	0.153238	0.107586	0.171153	0.170535
																						0.028646	0.04821	0.053318	0.066381		208.02	0.404209	0.421493	0.15704	0.167847	0.154428	0.112668	0.169283	0.168963
																						0.131558	0.027695	0.035959	0.073924		208.19	0.403872	0.421283	0.158315	0.164614	0.159999	0.107129	0.172825	0.169252
																						0.152777	0.075905	0.059518	0.058838		208.41	0.404477	0.420747	0.158187	0.166355	0.154853	0.107751	0.170148	0.169049
																						0.036072	0.074879	0.127715	0.277593		208.61	0.403755	0.423079	0.157729	0.166446	0.153694	0.103663	0.172152	0.168517
																						0.202642	0.029746	0.024799	0.107115		208.8	0.402636	0.424803	0.157521	0.167901	0.15751	0.108353	0.176796	0.169739
																						0.092303	0.060518	0.055798	0.061855		209.02	0.401933	0.424421	0.160987	0.167957	0.156642	0.107841	0.170322	0.165236
																						0.056231	0.247203	0.040918	1.75306		209.22	0.404243	0.421385	0.156575	0.168314	0.157565	0.109621	0.168297	0.1693
																						0.027585	0.136423	0.037199	1.30649		209.41	0.405513	0.423866	0.155684	0.164405	0.154886	0.110241	0.167237	0.173824
																						0.176118	0.109754	0.075637	0.037716		209.61	0.403814	0.426848	0.158984	0.169223	0.153711	0.110073	0.170289	0.172876
																						0.521989	0.144246	0.368266	0.05582		209.81	0.401405	0.423758	0.158545	0.168692	0.156492	0.109483	0.172987	0.167942
																						0.127314	0.061333	0.029759	0.070907		210.02	0.404786	0.422752	0.160887	0.165279	0.156823	0.108223	0.17154	0.170389
																						0.046682	0.122666	0.053318	0.058838		210.22	0.401855	0.421616	0.158601	0.165674	0.160958	0.110388	0.172741	0.172795
																						0.028646	0.06474	0.101676	0.193108		210.41	0.403306	0.425852	0.159337	0.16837	0.157	0.106141	0.174015	0.174296
																						0.237653	0.097679	0.894005	0.093537		210.61	0.404674	0.42432	0.161044	0.170851	0.158067	0.108878	0.172084	0.169315
																						0.061535	0.039753	0.055798	0.058838		210.81	0.404916	0.427459	0.157577	0.168021	0.15509	0.105866	0.173012	0.171289
																						0.286457	0.060197	0.314948	0.236859		211.01	0.403983	0.424463	0.160504	0.166601	0.155596	0.107172	0.172208	0.169388
																						0.34481	0.059061	0.08883	0.051294		211.22	0.406906	0.420037	0.159379	0.167526	0.156434	0.106208	0.170741	0.174257
																						0.108217	0.062469	0.116656	0.070907		211.42	0.408534	0.423546	0.161984	0.167896	0.156197	0.109356	0.173685	0.171826
																						0.216434	0.123802	0.128429	0.024138		211.61	0.402646	0.42512	0.158028	0.16709	0.160126	0.110234	0.171933	0.169925
																						0.049865	0.087456	0.039599	0.027156		211.81	0.406972	0.429872	0.160318	0.169335	0.156471	0.111023	0.171566	0.170724
																						0.035011	0.029531	0.115586	0.060346		212.01	0.403669	0.42459	0.164582	0.169098	0.156167	0.109073	0.175135	0.173047
																						0.108217	0.072691	0.059933	0.324361		212.22	0.409438	0.426859	0.160989	0.167644	0.15786	0.106283	0.173522	0.171542
																						0.113522	0.031802	0.062074	0.128236		212.42	0.404825	0.424937	0.162385	0.169005	0.15709	0.103974	0.17551	0.172899
																						0.024932	0.059061	0.04281	0.03319		212.61	0.407006	0.427617	0.159303	0.165989	0.160137	0.112639	0.177097	0.174367
																						0.039891	0.109037	0.247225	0.081467		212.81	0.404862	0.426869	0.156945	0.165888	0.15651	0.10746	0.174388	0.171108
																						0.322452	0.038617	0.300737	0.030173		213.01	0.40977	0.422752	0.161127	0.169469	0.159634	0.111486	0.173569	0.174849
																						0.084768	0.027259	1.67814	0.190091		213.21	0.404635	0.426996	0.161097	0.169206	0.155059	0.107722	0.172675	0.170522
																						0.044877	0.027259	0.035318	0.030173		213.42	0.40457	0.42624	0.160491	0.167004	0.153701	0.116026	0.174995	0.173302
																						0.036567	0.077234	0.04388	0.568763		213.62	0.406833	0.427234	0.161552	0.170191	0.155876	0.10839	0.174699	0.169938
																						0.079782	0.061333	0.064214	0.099571		213.79	0.407716	0.4281	0.156522	0.167653	0.155567	0.109288	0.17452	0.17301
																						0.088093	0.031802	0.084549	0.090519		214.01	0.406503	0.42741	0.162894	0.170663	0.159706	0.108399	0.171863	0.17139
																						0.081444	0.024988	0.050301	0.046768		214.21	0.404264	0.425353	0.165124	0.16627	0.155894	0.111447	0.170109	0.170626
																						0.03158	0.076098	0.052442	0.125218		214.4	0.408785	0.427998	0.161566	0.169291	0.15785	0.10624	0.173464	0.171803
																						0.046539	0.044296	0.725623	0.813165		214.62	0.406992	0.430188	0.157006	0.16922	0.160034	0.113808	0.173932	0.170383
																						0.161226	0.074963	0.056723	0.043751		214.81	0.406434	0.426167	0.157589	0.166905	0.158477	0.106005	0.176889	0.176294
																						0.104714	0.069284	0.064214	0.187073		214.99	0.419269	0.426546	0.161065	0.170631	0.158451	0.11168	0.172078	0.174783
																						0.119673	0.240789	0.128429	0.226298		215.21	0.415669	0.429636	0.162435	0.171001	0.160641	0.105451	0.17519	0.171058
																						0.127984	0.027259	0.884018	0.028664		215.41	0.412211	0.425969	0.157886	0.167295	0.160494	0.111467	0.177651	0.172679
																						0.305831	0.036346	0.873316	0.093537		215.6	0.412356	0.430469	0.163234	0.170984	0.161866	0.110154	0.176	0.175368
																						0.043215	0.060197	0.054582	0.042242		215.82	0.414977	0.427561	0.161864	0.172308	0.158066	0.110528	0.16869	0.173936
																						0.071471	0.116987	0.103813	0.030173		215.99	0.411666	0.429076	0.1646	0.169524	0.158752	0.109605	0.172162	0.171837
																						0.03158	0.097679	0.263279	0.039225		216.19	0.417788	0.425858	0.164424	0.170826	0.159739	0.109535	0.175862	0.177511
																						0.069809	0.233974	0.93753	0.028664		216.41	0.41676	0.42876	0.160413	0.170525	0.156371	0.108513	0.179369	0.174001
																						0.096403	0.053382	0.031037	0.147848		216.62	0.412916	0.427671	0.158986	0.169029	0.162936	0.112057	0.176565	0.171773
																						0.026594	0.03521	0.470906	0.024138		216.82	0.417201	0.426174	0.162614	0.169483	0.156004	0.110714	0.175108	0.170841
																						0.091417	0.059061	0.293246	0.040734		217.01	0.416656	0.429816	0.163546	0.170509	0.161282	0.110785	0.177795	0.171538
																						0.073133	0.044296	0.258998	0.028664		217.21	0.414893	0.427536	0.162159	0.16622	0.161088	0.110178	0.17713	0.175292
																						0.581743	0.201036	0.101673	0.168969		217.41	0.416075	0.429824	0.163496	0.171287	0.159492	0.107118	0.17792	0.176589
																						0.048202	0.038617	0.275052	0.090519		217.61	0.416938	0.430567	0.162234	0.169096	0.164119	0.108825	0.177561	0.176065
																						0.049864	0.385035	0.024616	0.1569		217.82	0.415647	0.42644	0.161934	0.171117	0.15816	0.108384	0.175576	0.175589
																						0.45376	0.029531	0.035318	0.034699		218.02	0.413041	0.432283	0.166272	0.170392	0.158127	0.107163	0.179434	0.177806
																						0.270926	0.088592	0.772713	0.034699		218.21	0.414762	0.431025	0.16179	0.170446	0.160558	0.114684	0.179064	0.174474
																						0.239346	0.190814	0.031037	0.22479		218.41	0.416432	0.429117	0.163013	0.167302	0.159969	0.111914	0.172861	0.173158
																						0.029918	0.026123	1.06596	0.060346		218.61	0.417279	0.429844	0.164022	0.175708	0.158899	0.1102	0.173203	0.171047
																						0.368991	0.039753	0.13164	0.104097		218.82	0.414759	0.431375	0.163657	0.170498	0.162296	0.109802	0.178593	0.176041
																						0.16455	0.109037	0.215118	0.03319		219.02	0.417029	0.430726	0.160668	0.169818	0.164244	0.108515	0.177676	0.174422
																						0.480354	0.114716	0.251506	0.268541		219.2	0.420166	0.427449	0.163753	0.171461	0.163381	0.113193	0.175952	0.177025
																						0.103052	0.129481	0.118797	0.070907		219.41	0.413278	0.432966	0.160917	0.171611	0.15957	0.111656	0.177571	0.18094
																						0.231035	0.081777	0.172309	0.108623		219.61	0.415178	0.432382	0.162256	0.173026	0.160787	0.108389	0.177352	0.17417
																						0.028256	0.051111	0.583281	0.079959		219.81	0.418545	0.432888	0.163576	0.169557	0.160922	0.109364	0.1781	0.171175
																						0.656539	0.034074	0.083479	0.090519		220	0.413476	0.432889	0.16674	0.172281	0.16468	0.108315	0.175389	0.174236
																						0.043215	0.263505	0.08776	0.063364		220.22	0.415711	0.431444	0.163224	0.17219	0.164951	0.111785	0.179685	0.176942
																						0.061499	0.079506	0.064214	0.028664		220.41	0.414173	0.430856	0.16694	0.169812	0.157958	0.11047	0.177578	0.171266
																						0.046539	0.414566	0.055652	0.096554		220.59	0.418138	0.432512	0.167214	0.16901	0.16202	0.110065	0.17721	0.173127
																						0.028256	0.057926	0.162677	0.057329		220.81	0.417464	0.437437	0.159459	0.172505	0.162107	0.113869	0.180329	0.172309
																						0.024932	0.073827	0.309299	0.076941		221.01	0.41945	0.43279	0.166169	0.17245	0.159715	0.114268	0.174269	0.176061
																						0.340735	0.047703	0.225821	0.027156		221.2	0.417891	0.431008	0.164091	0.169796	0.164959	0.109182	0.180277	0.172055
																						0.038229	0.057926	0.026756	0.113149		221.42	0.417262	0.432377	0.165335	0.168199	0.164235	0.109206	0.175525	0.174264
																						0.084768	0.138567	0.282543	0.027156		221.61	0.413316	0.432774	0.164279	0.173755	0.165658	0.111541	0.178187	0.175613
																						0.144605	0.127209	0.323212	0.04526		221.79	0.417706	0.433388	0.165143	0.172896	0.166058	0.11205	0.177883	0.176237
																						0.124659	0.03521	0.172309	0.1569		222.01	0.418602	0.436204	0.16516	0.172275	0.164119	0.108803	0.178981	0.177965
																						0.108038	0.045432	0.029967	0.042242		222.22	0.414651	0.433137	0.164612	0.174929	0.163392	0.112748	0.178578	0.176328
																						0.051526	0.152197	0.140201	0.057329		222.4	0.416313	0.432538	0.16506	0.171586	0.160607	0.11132	0.178864	0.176081
																						0.167875	0.122666	0.171238	0.05582		222.61	0.419289	0.432017	0.167684	0.174154	0.161252	0.11306	0.178763	0.179804
																						0.154578	0.087456	0.072776	0.024138		222.81	0.416605	0.434703	0.163747	0.172861	0.16193	0.112496	0.178994	0.176025
																						0.415531	0.038617	0.184081	0.036208		223	0.417866	0.430695	0.162944	0.171866	0.163348	0.110281	0.179294	0.172781
																						0.523569	0.073827	0.061004	0.04526		223.21	0.414552	0.437017	0.162817	0.169764	0.160562	0.111405	0.176136	0.180168
																						0.026594	0.547454	0.029967	0.024138		223.42	0.413329	0.438025	0.165069	0.172513	0.161321	0.110647	0.177957	0.171175
																						0.355694	0.068148	0.105954	0.12371		223.62	0.418703	0.433929	0.1687	0.172188	0.160671	0.110214	0.178185	0.180414
																						0.154578	0.05679	0.226891	0.04526		223.81	0.418543	0.436793	0.164073	0.171891	0.162876	0.115195	0.178142	0.176607
																						0.157902	0.031802	0.127359	0.036208		224.01	0.414671	0.437597	0.166654	0.171714	0.159052	0.113583	0.179059	0.176207
																						0.028256	0.417973	0.57793	0.043751		224.21	0.414492	0.438692	0.167964	0.178386	0.162202	0.110595	0.182147	0.173468
																						0.051526	0.226024	0.107024	0.129744		224.41	0.41839	0.435749	0.166989	0.17358	0.159644	0.111162	0.18184	0.175309
																						0.192806	0.094271	0.08776	0.042242		224.62	0.416959	0.435761	0.163133	0.172863	0.160044	0.114513	0.183025	0.175065
																						0.127984	0.107901	0.08776	0.03319		224.8	0.419323	0.434734	0.169327	0.175355	0.163636	0.109685	0.181365	0.17764
																						0.061499	0.069284	0.026756	0.440527		225.01	0.418571	0.437322	0.168589	0.175145	0.161336	0.112671	0.181205	0.177895
																						0.046539	0.128345	0.072776	0.05582		225.21	0.420512	0.436913	0.164599	0.172974	0.162158	0.112954	0.180256	0.17513
																						0.206103	0.038617	0.031037	0.066381		225.41	0.417165	0.438046	0.165871	0.173566	0.164899	0.111922	0.18264	0.176344
																						0.061499	0.037481	0.047091	0.084485		225.62	0.417609	0.439833	0.164106	0.174009	0.161626	0.111833	0.177939	0.175613
																						0.068147	0.054518	0.04281	0.040734		225.82	0.418161	0.437853	0.166848	0.173587	0.163197	0.112486	0.178133	0.176464
																						0.114687	0.222616	0.049231	0.051294		226.01	0.41828	0.439984	0.166909	0.173142	0.164911	0.109727	0.179371	0.180585
																						0.061499	0.088592	0.065285	0.024138		226.19	0.416809	0.434287	0.16945	0.175827	0.162443	0.113177	0.17913	0.17535
																						0.041553	0.046568	0.061004	0.061855		226.41	0.419102	0.435214	0.166665	0.173489	0.162774	0.113829	0.177421	0.180422
																						0.749618	0.13516	0.031037	0.027156		226.61	0.420154	0.434606	0.166704	0.174996	0.163937	0.112096	0.181488	0.179767
																						0.056512	0.068148	0.050301	0.063364		226.8	0.415918	0.434988	0.166856	0.173486	0.165199	0.113649	0.179433	0.177489
																						0.61831	0.088592	0.075987	0.046768		227.01	0.413794	0.436766	0.167044	0.174462	0.165058	0.111667	0.180184	0.179083
																						0.616648	0.061333	0.058863	0.028664		227.21	0.41633	0.440224	0.165696	0.174214	0.165524	0.115412	0.182262	0.181686
																						0.058174	0.131752	0.067425	0.096554		227.39	0.41733	0.438111	0.164083	0.173441	0.164923	0.11331	0.180234	0.179284
																						0.438801	0.049975	0.025686	0.079959		227.61	0.417368	0.438389	0.164282	0.173283	0.165299	0.109398	0.180583	0.176449
																						0.034905	0.247604	0.08883	0.116167		227.82	0.413134	0.438798	0.164164	0.172463	0.166736	0.109244	0.181898	0.17549
																						0.226049	0.249875	0.037458	0.031682		228	0.418814	0.437391	0.170659	0.172216	0.161681	0.111433	0.182443	0.17168
																						0.041553	0.061333	0.051372	0.027156		228.21	0.418337	0.434964	0.165773	0.173969	0.163149	0.115943	0.177803	0.180983
																						0.036567	0.203308	0.041739	0.069398		228.41	0.416942	0.437466	0.166105	0.177093	0.164401	0.11308	0.181849	0.177506
																						0.146267	0.072691	0.034248	0.025647		228.6	0.421201	0.439149	0.16779	0.178311	0.163689	0.114156	0.178371	0.180319
																						0.068147	0.107901	0.025686	0.030173		228.82	0.417798	0.435164	0.166662	0.175332	0.163841	0.111119	0.181079	0.179416
																						0.400572	0.028395	0.13485	0.04526		229	0.417705	0.437316	0.167186	0.176328	0.160342	0.114798	0.179727	0.178168
																						0.079782	0.116987	0.037458	0.048277		229.2	0.418253	0.43807	0.169087	0.173044	0.163664	0.109151	0.180589	0.179561
																						0.621634	0.115851	0.029967	0.064872		229.41	0.414419	0.438363	0.164868	0.177081	0.16415	0.113969	0.184483	0.176297
																						0.965694	0.047703	0.027519	0.028664		229.6	0.41988	0.441641	0.169258	0.175727	0.165587	0.111803	0.179403	0.179002
																						0.111362	0.126074	0.051864	0.05582		229.8	0.418246	0.44015	0.165693	0.178009	0.164764	0.113406	0.179666	0.178489
																						0.05485	0.037481	0.086792	0.043751		230.02	0.416509	0.436951	0.167221	0.176573	0.162664	0.110562	0.181669	0.182196
																						0.029918	0.046568	0.074091	0.036208		230.22	0.417147	0.441037	0.167861	0.17644	0.164977	0.111548	0.178902	0.180342
																						0.034905	0.032938	0.057156	0.042242		230.41	0.417128	0.436003	0.164648	0.176887	0.162782	0.114593	0.178668	0.179409
																						0.026594	0.038617	0.049747	0.116167		230.61	0.41829	0.442612	0.168863	0.178327	0.165055	0.109535	0.179316	0.180389
																						0.026594	0.077234	0.034929	0.025647		230.81	0.419099	0.437476	0.162578	0.178963	0.166214	0.113247	0.179479	0.177501
																						0.043215	0.315752	0.14289	0.066381		231.01	0.418184	0.440487	0.169868	0.175961	0.165235	0.114739	0.181354	0.178587
																						0.05485	0.197629	0.046571	0.075433		231.22	0.418741	0.443879	0.170783	0.176904	0.165205	0.113682	0.179338	0.17762
																						0.216076	0.085185	0.041279	0.037716		231.42	0.421664	0.437913	0.167411	0.177907	0.165541	0.11737	0.183026	0.1787
																						0.03158	0.051111	0.110078	0.032364		231.61	0.418612	0.44117	0.166563	0.177553	0.164676	0.113311	0.179605	0.179706
																						0.034905	0.052247	0.046571	0.030206		231.81	0.420535	0.442305	0.168156	0.176689	0.160977	0.115129	0.182749	0.17893
																						0.038229	0.032938	0.078325	0.034521		232.01	0.419389	0.441973	0.167213	0.177179	0.162593	0.112338	0.177983	0.179619
																						0.312479	0.12153	0.046571	0.060412		232.21	0.420059	0.441371	0.166887	0.176794	0.166922	0.115994	0.180496	0.181704
																						0.076458	0.25669	0.051864	0.059333		232.4	0.417882	0.442076	0.16585	0.175788	0.164098	0.115068	0.178199	0.176437
																						0.521907	0.070419	0.029636	0.08846		232.6	0.416926	0.441926	0.172109	0.175795	0.164179	0.112025	0.183665	0.177604
																						0.104714	0.093135	0.049747	0.02697		232.81	0.416189	0.442059	0.170258	0.17863	0.164446	0.112394	0.181632	0.182657
																						0.048202	0.169234	0.10902	0.025891		232.99	0.41722	0.440728	0.166397	0.176889	0.167927	0.116537	0.182429	0.180547
																						0.056512	0.072691	0.026461	0.032364		233.21	0.420054	0.443302	0.169088	0.178882	0.167581	0.112248	0.184119	0.177528
																						0.046539	0.396393	0.086792	0.076594		233.42	0.426654	0.440295	0.167957	0.178012	0.163665	0.117694	0.181937	0.178981
																						0.206103	0.047703	0.050805	0.032364		233.6	0.438181	0.443177	0.167492	0.177971	0.168481	0.11563	0.186746	0.182665
																						0.089755	0.052247	0.060331	0.036679		233.81	0.434088	0.441744	0.166952	0.174261	0.165261	0.118211	0.1829	0.183365
																						0.039891	0.030667	0.026461	0.043151		234.01	0.436404	0.444385	0.168766	0.181759	0.165148	0.118109	0.182842	0.181396
																						0.073133	0.054518	0.039162	0.070121		234.2	0.437768	0.445447	0.168299	0.181379	0.164972	0.114534	0.184066	0.178745
																						0.21109	0.275999	0.034929	0.033442		234.41	0.43873	0.445674	0.168668	0.177197	0.166625	0.115282	0.185529	0.179151
																						0.081444	0.328245	0.130188	0.061491		234.6	0.442808	0.44362	0.171474	0.176618	0.164327	0.115008	0.18275	0.181446
																						0.147929	0.197629	0.025403	0.025891		234.8	0.439855	0.443781	0.168149	0.176358	0.162967	0.113082	0.183858	0.181339
																						0.034905	0.024988	0.116429	0.04423		235.01	0.434374	0.445387	0.169882	0.177749	0.165606	0.116866	0.179784	0.185115
																						0.307493	0.065876	0.117487	0.077672		235.21	0.439669	0.444851	0.169092	0.178411	0.164168	0.117928	0.186145	0.178891
																						0.053188	0.036346	0.037045	0.034521		235.41	0.43451	0.444648	0.169674	0.177362	0.165643	0.114365	0.183714	0.180371
																						0.081444	0.089728	0.037045	0.032364		235.62	0.440133	0.444226	0.168949	0.179212	0.168956	0.115023	0.182866	0.181592
																						0.191144	0.204443	0.068799	0.048545		235.8	0.437266	0.4426	0.168925	0.176634	0.170165	0.113345	0.180565	0.183484
																						0.029918	0.045432	0.274136	0.093854		236.01	0.436273	0.440939	0.170433	0.176423	0.163486	0.119866	0.180284	0.182819
																						0.039891	0.157876	0.032812	0.063648		236.21	0.434365	0.445471	0.166811	0.179753	0.169275	0.113766	0.180827	0.179267
																						0.093079	0.1999	0.260377	0.039915		236.4	0.437656	0.446069	0.170637	0.179534	0.167296	0.121736	0.180968	0.180687
																						0.139618	0.077234	0.037045	0.024812		236.6	0.438616	0.445712	0.168865	0.178308	0.166954	0.116634	0.185947	0.184229
																						0.07812	0.148789	0.046571	0.051782		236.82	0.438769	0.447492	0.168657	0.178088	0.16612	0.114702	0.185432	0.184193
																						0.272588	0.087456	0.065623	0.085224		237	0.434193	0.447673	0.170846	0.175692	0.167071	0.114191	0.185155	0.180858
																						0.053621	0.060197	0.025403	0.056097		237.21	0.438063	0.447814	0.170696	0.178922	0.169367	0.11178	0.182442	0.181101
																						0.081843	0.038617	0.247675	0.120824		237.41	0.43837	0.444665	0.167674	0.176371	0.16492	0.117807	0.183114	0.181042
																						0.024459	0.070419	0.092084	0.055018		237.61	0.441761	0.44264	0.172933	0.179971	0.167047	0.116198	0.184332	0.181872
																						0.041392	0.224888	0.216981	0.031285		237.82	0.439967	0.447114	0.169807	0.180254	0.166911	0.115277	0.183633	0.183087
																						0.083724	0.090864	0.029636	0.040994		238.02	0.443088	0.44685	0.171472	0.175339	0.169235	0.116214	0.183901	0.180106
																						0.040451	0.036346	0.263552	0.055018		238.21	0.439065	0.450678	0.171245	0.178977	0.167278	0.117511	0.183563	0.184032
																						0.030103	0.03521	0.310123	0.024812		238.41	0.434223	0.445278	0.171927	0.180136	0.166968	0.115768	0.183838	0.183242
																						0.03857	0.166962	0.063507	0.053939		238.61	0.435903	0.445611	0.172775	0.183454	0.167112	0.117212	0.183091	0.180681
																						0.028222	0.120395	0.030695	0.048545		238.81	0.43919	0.449139	0.169994	0.178967	0.169596	0.117994	0.183759	0.184242
																						0.041392	0.12153	0.50276	0.029127		239.02	0.438793	0.445051	0.168351	0.183947	0.164273	0.115384	0.18713	0.181515
																						0.093132	0.093135	0.099494	0.15966		239.2	0.43899	0.446157	0.167986	0.179523	0.166523	0.117756	0.183638	0.183353
																						0.048918	0.074963	1.21403	0.034521		239.41	0.442037	0.44399	0.171016	0.180351	0.169858	0.11904	0.183976	0.183939
																						0.032925	0.027259	0.45513	0.066885		239.61	0.440803	0.44868	0.169988	0.179906	0.167249	0.11825	0.184228	0.183166
																						0.033866	0.038617	0.992818	0.030206		239.8	0.442585	0.445367	0.172583	0.184948	0.169245	0.117623	0.185128	0.182481
																						0.037629	0.034074	0.479474	0.0356		240.01	0.441289	0.446282	0.171285	0.181494	0.171856	0.116154	0.186467	0.18238
																						0.084665	0.082913	0.094201	0.073357		240.22	0.442303	0.447132	0.170928	0.177797	0.168291	0.114276	0.182878	0.180752
																						0.031985	0.072691	0.231799	0.053939		240.4	0.442458	0.447072	0.173526	0.182573	0.171098	0.120101	0.185902	0.181008
																						0.099717	0.179456	0.197929	0.23949		240.61	0.437928	0.447839	0.172341	0.180854	0.169585	0.116478	0.185497	0.184383
																						0.158042	0.029531	0.069857	0.0356		240.81	0.441007	0.448352	0.172512	0.182826	0.168022	0.115032	0.188449	0.184333
																						0.033866	0.193086	0.024344	0.062569		241	0.438056	0.44856	0.171895	0.179804	0.169064	0.115765	0.184709	0.182579
																						0.03857	0.042024	1.55697	0.242726		241.22	0.441846	0.450206	0.175099	0.178027	0.169343	0.115622	0.187879	0.182437
																						0.32455	0.126074	0.059273	0.076594		241.42	0.439643	0.447914	0.174097	0.177523	0.170089	0.114139	0.188449	0.179389
																						0.068673	0.046568	0.053981	0.053939		241.61	0.438116	0.445376	0.169961	0.183999	0.167876	0.116497	0.182607	0.186517
																						0.367823	0.1999	1.71891	0.063648		241.81	0.442421	0.446914	0.170589	0.18086	0.173845	0.117499	0.183022	0.182803
																						0.777978	0.057926	0.071974	0.067963		242.01	0.438654	0.446139	0.169821	0.181815	0.166931	0.116977	0.186243	0.185066
																						0.093132	0.061333	0.04763	0.059333		242.2	0.443402	0.449629	0.169047	0.179129	0.172738	0.11828	0.182718	0.182581
																						0.266225	0.059061	0.045513	0.058254		242.42	0.443033	0.448121	0.168076	0.183483	0.166276	0.116529	0.182733	0.184248
																						0.366882	0.040889	0.998111	0.033442		242.6	0.444517	0.447164	0.171982	0.181494	0.171223	0.120541	0.183279	0.183262
																						0.068673	0.037481	0.060331	0.029127		242.81	0.443413	0.450293	0.171354	0.17913	0.168367	0.119156	0.185334	0.184191
																						0.030103	0.369134	0.251909	0.031285		243.01	0.443232	0.448982	0.175927	0.182485	0.172177	0.116919	0.183956	0.185865
																						0.0254	0.034074	0.038104	0.074436		243.2	0.440436	0.451798	0.173679	0.181242	0.170357	0.114351	0.186037	0.1838
																						0.229536	0.145382	0.4075	0.032364		243.42	0.439809	0.44752	0.170846	0.181319	0.168683	0.118033	0.189767	0.184414
																						0.179678	0.061333	0.083617	0.236254		243.62	0.444135	0.448391	0.175925	0.183769	0.172521	0.120454	0.184216	0.184167
																						0.0254	0.116987	0.315416	0.042073		243.81	0.438932	0.451881	0.174207	0.178168	0.17267	0.116497	0.185285	0.186733
																						0.144871	0.122666	0.399033	0.046388		244.01	0.439606	0.448363	0.16966	0.180236	0.168791	0.122144	0.182623	0.185536
																						0.646277	0.072691	0.066682	0.038836		244.21	0.438426	0.449924	0.169616	0.183149	0.168392	0.115249	0.189446	0.184032
																						0.244588	0.024988	0.029636	0.087381		244.41	0.442241	0.451108	0.171394	0.179524	0.169578	0.120126	0.187238	0.183647
																						0.036688	0.076098	0.114312	0.0712		244.62	0.439969	0.448444	0.177521	0.180643	0.171681	0.119282	0.186142	0.184272
																						0.040451	0.079506	0.140773	0.029127		244.8	0.441944	0.4485	0.175987	0.182776	0.167043	0.119419	0.187856	0.186915
																						0.097835	0.072691	0.080442	0.032364		245.01	0.441952	0.449284	0.174043	0.179574	0.173006	0.11499	0.18455	0.186499
																						0.042333	0.071555	0.025403	0.076594		245.21	0.442954	0.450506	0.172402	0.182994	0.171055	0.11728	0.185618	0.184043
																						0.188145	0.024988	0.042338	0.090618		245.41	0.443432	0.448885	0.171503	0.183764	0.167069	0.121037	0.188336	0.186105
																						0.291624	0.232838	0.046571	0.233017		245.62	0.440806	0.451766	0.175534	0.181948	0.170989	0.120269	0.186312	0.185314
																						0.028222	0.030667	0.031753	0.034521		245.82	0.442746	0.453825	0.175795	0.181802	0.169166	0.117931	0.185422	0.181918
																						0.035747	0.024988	0.025514	0.1068		246.01	0.44038	0.4546	0.169306	0.181751	0.171089	0.118167	0.187185	0.189342
																						0.198493	0.056337	0.05628	0.077672		246.21	0.442099	0.451315	0.174193	0.182273	0.169899	0.113987	0.187489	0.186345
																						0.228596	0.065726	0.032267	0.120824		246.41	0.44145	0.451224	0.173952	0.179235	0.169388	0.119937	0.188184	0.184321
																						0.228596	0.077202	0.040522	0.043151		246.6	0.441012	0.452622	0.174937	0.182256	0.172441	0.118091	0.187338	0.185224
																						0.079961	0.023995	0.060782	0.062569		246.82	0.446317	0.448689	0.172834	0.182203	0.170271	0.116623	0.18678	0.183597
																						0.068673	0.128322	0.035269	0.05286		247.02	0.442163	0.448833	0.173459	0.182117	0.167482	0.116523	0.184329	0.186265
																						0.079961	0.068856	0.366195	0.033442		247.21	0.44032	0.44983	0.175875	0.182464	0.170391	0.121328	0.186941	0.18461
																						0.11759	0.066769	0.029266	0.053939		247.41	0.43781	0.45176	0.175706	0.1868	0.168887	0.118288	0.187392	0.185829
																						0.353712	0.121019	0.027014	0.497319		247.61	0.444367	0.448737	0.176828	0.182594	0.168448	0.119136	0.188837	0.185235
																						0.215426	0.043817	0.116312	0.069042		247.8	0.439796	0.451937	0.178608	0.181573	0.171592	0.120722	0.183107	0.183229
																						0.031044	0.035471	0.129819	0.063648		248.02	0.443535	0.454415	0.174407	0.185142	0.171251	0.119932	0.18743	0.183982
																						0.075258	0.104327	0.026264	0.043151		248.21	0.443731	0.453853	0.172983	0.180652	0.173203	0.118308	0.184007	0.183698
																						0.067732	0.027125	0.108058	0.066885		248.39	0.445246	0.454165	0.176691	0.182189	0.172414	0.119181	0.187372	0.179987
																						0.046095	0.221173	0.207861	0.700131		248.61	0.439605	0.451791	0.171039	0.184497	0.172756	0.118917	0.187168	0.183943
																						0.130761	0.029212	0.291155	0.395914		248.8	0.442292	0.455175	0.175757	0.182282	0.172052	0.117879	0.188381	0.182193
																						0.0254	0.139798	0.947004	0.043151		249	0.441573	0.45581	0.176005	0.184849	0.173125	0.117912	0.187521	0.182223
																						0.198493	0.100154	0.913986	0.128375		249.22	0.443065	0.453613	0.173417	0.177594	0.167999	0.121878	0.186269	0.181308
																						0.111005	0.094938	0.029266	0.04423		249.41	0.445524	0.45304	0.17728	0.184543	0.167893	0.116589	0.185896	0.186132
																						0.605826	0.023995	0.054029	0.042073		249.59	0.445392	0.451427	0.17626	0.179619	0.172698	0.119924	0.18748	0.185883
																						0.235181	0.053207	0.114811	0.063648		249.81	0.441966	0.455098	0.174797	0.189083	0.176854	0.119716	0.187623	0.185979
																						0.057384	0.05425	0.078792	0.060412		250	0.440766	0.453953	0.174601	0.182224	0.172088	0.119	0.185487	0.184307
																						0.10442	0.180486	0.232624	0.056097		250.2	0.444257	0.456696	0.173637	0.184077	0.173773	0.114913	0.187578	0.1874
																						0.042333	0.080332	1.33421	0.085224		250.42	0.444322	0.453055	0.173884	0.18553	0.169323	0.117997	0.187746	0.186981
																						0.111946	0.05738	0.076541	0.574992		250.61	0.444843	0.457839	0.174696	0.185828	0.170498	0.121561	0.189263	0.187161
																						0.463777	0.049034	0.459995	0.02697		250.81	0.443559	0.45492	0.175816	0.183391	0.175393	0.12177	0.190981	0.184769
																						0.190026	0.028168	0.177845	0.20389		251.01	0.44267	0.453168	0.171632	0.183226	0.169893	0.120603	0.187316	0.184609
																						0.369704	0.146058	0.032267	0.032364		251.22	0.441745	0.455015	0.173222	0.182936	0.173566	0.117923	0.18847	0.191755
																						0.024459	0.148144	1.46928	0.070121		251.42	0.447881	0.453924	0.172232	0.185868	0.171299	0.115439	0.188561	0.186323
																						0.05174	0.046947	0.339931	0.040994		251.61	0.443179	0.453955	0.171531	0.183224	0.170456	0.120408	0.186931	0.185693
																						0.225774	0.034428	0.03752	0.045309		251.81	0.445159	0.454629	0.172487	0.18401	0.171994	0.12112	0.191388	0.186038
																						0.061147	0.044861	0.024763	0.030206		252.01	0.445034	0.452768	0.176497	0.185764	0.171727	0.116359	0.189871	0.186134
																						0.073376	0.062596	0.359441	0.042073		252.2	0.442253	0.45417	0.17919	0.189164	0.174358	0.121213	0.188782	0.183823
																						0.077139	0.125193	0.473502	0.059333		252.42	0.447274	0.454252	0.175104	0.185285	0.173612	0.125673	0.189741	0.189283
																						0.187204	0.033385	0.3767	0.033442		252.62	0.444603	0.45564	0.174348	0.181066	0.170441	0.121205	0.187933	0.187343
																						0.098776	0.049034	0.048026	0.085224		252.79	0.44441	0.451807	0.17458	0.18531	0.172908	0.117	0.190049	0.186795
																						0.040451	0.037558	0.117062	0.024812		253.01	0.446255	0.458822	0.178211	0.183733	0.172214	0.120839	0.191019	0.187468
																						0.149575	0.039644	0.032267	0.033442		253.21	0.445164	0.460948	0.178079	0.186266	0.174819	0.118581	0.191613	0.183896
																						0.171212	0.222217	1.10759	0.051782		253.4	0.446229	0.458334	0.174067	0.185404	0.172153	0.119977	0.190593	0.186609
																						0.110065	0.098067	0.069787	0.536156		253.62	0.446269	0.456252	0.17907	0.186801	0.175309	0.123485	0.189551	0.185001
																						0.147694	0.028168	0.767659	0.073357		253.82	0.446456	0.456108	0.175431	0.181627	0.173632	0.118312	0.190829	0.19481
																						0.439318	0.082418	0.177094	0.064727		253.99	0.441985	0.458744	0.176346	0.182943	0.176833	0.114668	0.191785	0.188327
																						0.162745	0.292116	0.192102	0.038836		254.21	0.444482	0.461208	0.179259	0.187448	0.170745	0.121676	0.189347	0.192196
																						0.351831	0.081375	0.036019	0.103563		254.41	0.444427	0.456324	0.176111	0.183074	0.173546	0.116881	0.18701	0.186021
																						0.087487	0.126236	0.033018	0.04423		254.6	0.444877	0.460606	0.174019	0.183736	0.171023	0.11771	0.188055	0.186442
																						0.054562	0.066769	0.069037	0.02697		254.82	0.444123	0.456304	0.17834	0.183222	0.173844	0.121281	0.187591	0.18725
																						0.102539	0.142928	0.072789	0.033442		254.99	0.445908	0.457267	0.174225	0.188226	0.176099	0.120032	0.193789	0.185976
																						0.27375	0.069899	0.066035	0.042073		255.19	0.443822	0.456188	0.176986	0.187176	0.175846	0.120281	0.190214	0.187188
																						0.301031	0.179443	1.84373	0.11543		255.41	0.446056	0.456982	0.177416	0.187021	0.169051	0.116744	0.191125	0.184067
																						0.31232	0.11476	1.23141	0.08846		255.6	0.447372	0.45396	0.177146	0.184042	0.172604	0.120447	0.189546	0.188672
																						0.420503	0.074072	1.18413	0.04423		255.8	0.445178	0.453554	0.174827	0.189675	0.177659	0.119202	0.189737	0.185074
																						0.186263	0.085548	0.128318	0.02697		256.02	0.442732	0.456466	0.176308	0.185751	0.173984	0.121865	0.189233	0.188202
																						0.037629	0.036514	0.044274	0.053939		256.21	0.446482	0.460097	0.175094	0.183403	0.168087	0.122701	0.18851	0.188927
																						0.056443	0.06364	0.623582	0.064727		256.41	0.443422	0.456048	0.173667	0.187456	0.180336	0.118529	0.191874	0.189165
																						0.174975	0.084505	0.11331	0.040994		256.61	0.449677	0.454065	0.17592	0.18504	0.172917	0.120372	0.189647	0.188948
																						0.678261	0.17214	0.453992	0.040994		256.82	0.448702	0.457222	0.17425	0.189555	0.17061	0.124435	0.190301	0.189702
																						0.03857	0.043817	0.088547	1.7692		257.02	0.442943	0.461508	0.177634	0.18767	0.171341	0.121664	0.191897	0.188648
																						0.183441	0.035471	0.079542	0.024812		257.21	0.443127	0.457891	0.173904	0.186568	0.178359	0.123822	0.195697	0.190445
																						0.10348	0.026082	0.530532	0.263223		257.41	0.444607	0.457144	0.177133	0.184464	0.174198	0.120409	0.191632	0.188564
																						0.11759	0.036514	0.127568	0.066885		257.61	0.448483	0.457936	0.177962	0.184862	0.17096	0.123804	0.190253	0.188211
																						0.340542	0.107457	0.190601	0.215757		257.82	0.446797	0.459503	0.176067	0.18898	0.169472	0.120498	0.192939	0.188408
																						0.068673	0.123106	0.706126	0.374338		258.02	0.445484	0.458056	0.178356	0.183969	0.176939	0.120311	0.189085	0.188252
																						0.138286	0.106414	0.040522	0.098169		258.22	0.445544	0.460634	0.175578	0.184043	0.173257	0.12153	0.19327	0.189632
																						0.06491	0.044861	0.042022	0.087381		258.39	0.447108	0.457475	0.177903	0.184113	0.175185	0.120125	0.189123	0.19171
																						0.134523	0.180486	0.027014	0.0356		258.61	0.444664	0.46023	0.178422	0.18606	0.177033	0.118375	0.188916	0.186401
																						0.058325	0.179443	0.490761	0.04423		258.81	0.44828	0.456664	0.172628	0.189142	0.173557	0.117091	0.192789	0.187771
																						0.029162	0.11476	0.090048	0.127297		259	0.444743	0.462259	0.178177	0.187247	0.175196	0.118962	0.192674	0.193728
																						0.346186	0.101197	0.242379	0.047466		259.22	0.445799	0.461776	0.17809	0.186708	0.172901	0.120512	0.190698	0.192278
																						0.085606	0.380794	1.17663	0.053939		259.41	0.447828	0.457987	0.175573	0.191895	0.17385	0.120638	0.189911	0.188857
																						0.03951	0.056337	0.028515	0.072279		259.59	0.443245	0.459905	0.175092	0.182432	0.171325	0.118922	0.192189	0.18816
																						0.206018	0.352626	0.025514	0.056097		259.81	0.444088	0.459859	0.180796	0.187083	0.178163	0.121095	0.19216	0.188585
																						0.85888	0.237866	0.044274	0.025891		260.01	0.447578	0.458891	0.176335	0.188219	0.17753	0.120835	0.192811	0.188072
																						0.035747	0.039644	0.026264	0.122981		260.2	0.447958	0.461332	0.177109	0.188375	0.177656	0.12021	0.193729	0.187962
																						0.082784	0.11476	0.024763	0.084145		260.42	0.450364	0.460908	0.175856	0.18472	0.174659	0.117924	0.190029	0.190346
																						0.027281	0.030255	0.354189	0.039915		260.61	0.44743	0.46352	0.177536	0.187127	0.178251	0.121685	0.188957	0.192149
																						0.071495	0.131452	0.18835	0.110036		260.79	0.44434	0.461255	0.180104	0.186981	0.175296	0.123673	0.193057	0.187912
																						0.137346	0.06364	0.027765	0.031285		261.01	0.446651	0.459571	0.178742	0.185563	0.175802	0.123147	0.1892	0.188548
																						0.0254	0.049034	0.058531	0.074436		261.21	0.451601	0.46295	0.178968	0.187331	0.175144	0.119884	0.189566	0.189899
																						0.031985	0.06364	2.53635	0.100327		261.4	0.448653	0.460782	0.177861	0.187238	0.17672	0.118528	0.1912	0.189636
																						0.107242	0.062596	1.20739	0.034521		261.6	0.444751	0.463368	0.178105	0.185385	0.177209	0.11954	0.192719	0.186217
																						0.061147	0.082418	0.064534	0.154266		261.81	0.446671	0.462597	0.178382	0.188846	0.176337	0.118955	0.189079	0.188015
																						0.034807	0.083462	0.042773	0.0356		261.99	0.44779	0.459253	0.177336	0.187204	0.175343	0.120175	0.195676	0.187673
																						0.100657	0.163794	0.035269	0.067963		262.21	0.445597	0.462416	0.178658	0.183969	0.175596	0.119611	0.1936	0.188878
																						0.108183	0.231606	0.029266	0.102485		262.42	0.449147	0.458877	0.175023	0.184823	0.175261	0.120172	0.188615	0.18965
																						0.400748	0.22326	0.060032	0.43475		262.62	0.444816	0.464326	0.178331	0.187761	0.175232	0.120256	0.194212	0.191186
																						0.238003	0.084505	0.099803	0.065806		262.81	0.451634	0.461724	0.176689	0.185924	0.172826	0.121699	0.193534	0.189243
																						0.030103	0.195092	0.042773	0.043151		263.01	0.442954	0.464406	0.177333	0.188462	0.177865	0.1224	0.191585	0.192192
																						0.448725	0.05112	0.034518	0.360314		263.21	0.447661	0.462007	0.181372	0.185904	0.175976	0.122364	0.193175	0.189812
																						0.028222	0.17214	0.040522	0.048545		263.41	0.445774	0.464237	0.177914	0.189854	0.176315	0.12057	0.193675	0.194436
																						0.213544	0.182572	0.051778	0.135927		263.62	0.451131	0.460524	0.179528	0.189455	0.174561	0.124615	0.195555	0.190573
																						0.061147	0.355755	0.05628	0.031285		263.8	0.44096	0.462701	0.1745	0.189298	0.177013	0.12487	0.189113	0.192902
																						0.099717	0.05425	0.066786	0.028048		264.01	0.45018	0.463204	0.181264	0.18379	0.176732	0.121879	0.191856	0.189692
																						0.029162	0.044861	0.063784	0.0356		264.21	0.442522	0.463928	0.175554	0.184437	0.173616	0.121753	0.191876	0.189038
																						0.034807	0.184659	0.132821	0.183393		264.41	0.451646	0.460599	0.180554	0.187532	0.177649	0.122168	0.193394	0.191781
																						0.028222	0.055293	0.043523	0.26646		264.6	0.449089	0.462287	0.183975	0.190976	0.175943	0.122096	0.187471	0.189879
																						0.024459	0.025039	0.125317	0.037757		264.82	0.447949	0.463566	0.180227	0.189266	0.178819	0.121943	0.190361	0.191956
																						0.114768	0.027125	0.071288	0.039915		265.01	0.449858	0.464491	0.180159	0.189465	0.178793	0.12196	0.193331	0.189186
																						0.200374	0.276467	0.045024	0.053939		265.19	0.448506	0.467613	0.181263	0.184018	0.174663	0.122759	0.194951	0.188122
																						0.144871	0.027125	0.060481	0.0356		265.41	0.448381	0.459186	0.178181	0.189189	0.174453	0.118762	0.19372	0.189389
																						0.02634	0.286899	0.037632	0.0356		265.61	0.446182	0.464211	0.182286	0.189038	0.179429	0.124113	0.193508	0.188251
																						0.074317	0.031298	0.086017	0.048545		265.8	0.452592	0.459038	0.176518	0.185691	0.173588	0.117889	0.19614	0.187481
																						0.099717	0.116846	0.044353	0.043151		266.02	0.447963	0.462723	0.179213	0.187477	0.178012	0.123066	0.188836	0.187408
																						0.027281	0.038601	0.038977	0.02697		266.21	0.449899	0.465314	0.180725	0.187828	0.184139	0.118867	0.194202	0.194562
																						0.032925	0.17527	0.053761	0.069042		266.4	0.447757	0.461108	0.180027	0.187368	0.17752	0.125369	0.192372	0.191394
																						0.074317	0.305678	0.133058	0.058254		266.61	0.443443	0.461676	0.1786	0.189818	0.176597	0.120455	0.192653	0.190121
																						0.087487	0.044861	0.549703	0.056097		266.82	0.44808	0.468123	0.181791	0.189272	0.176771	0.123002	0.19291	0.191118
																						0.060206	0.364102	0.501318	0.107878		267	0.449613	0.46716	0.177767	0.186287	0.177395	0.120188	0.195054	0.193164
																						0.261521	0.05112	0.02688	0.050703		267.21	0.4551	0.46277	0.178948	0.183448	0.177446	0.125209	0.194213	0.190989
																						0.047036	0.102241	0.951564	0.333344		267.41	0.450921	0.462494	0.179896	0.19059	0.180028	0.120018	0.193638	0.190372
																						0.043273	0.059466	1.92732	0.114351		267.6	0.449987	0.466807	0.181548	0.189934	0.175855	0.118894	0.193954	0.189302
																						0.151456	0.191962	0.028224	0.037757		267.81	0.449294	0.464355	0.183223	0.191174	0.177288	0.122452	0.19618	0.196613
																						0.054562	0.082418	0.13037	0.031285		268	0.450674	0.464117	0.182472	0.189982	0.17536	0.119468	0.197398	0.194419
																						0.130311	0.073029	1.2365	0.025891		268.2	0.453772	0.462315	0.177604	0.189064	0.179264	0.128535	0.194862	0.19346
																						0.105707	0.145015	0.084673	0.113272		268.41	0.449234	0.463858	0.183221	0.19077	0.180342	0.121804	0.196956	0.194284
																						0.030983	0.058423	0.069889	0.156424		268.61	0.449008	0.463747	0.18252	0.188167	0.179626	0.117799	0.192783	0.193047
																						0.091126	0.079289	0.059137	0.039915		268.8	0.45161	0.464691	0.183667	0.190124	0.173565	0.119901	0.197021	0.192477
																						0.114819	0.218044	0.088705	0.029127		269.02	0.45307	0.463706	0.181668	0.189763	0.178686	0.123228	0.1935	0.191556
																						0.287959	0.264991	0.080641	0.034521		269.22	0.450236	0.464446	0.180671	0.189909	0.17824	0.1217	0.196166	0.191344
																						0.169495	0.056337	0.108865	0.051782		269.4	0.452387	0.46413	0.180647	0.188406	0.174494	0.123697	0.195434	0.191684
																						0.102062	0.05112	0.666633	0.058254		269.61	0.452445	0.467581	0.180574	0.187463	0.180828	0.122469	0.19168	0.191288
																						0.170406	0.084505	0.034944	0.0356		269.81	0.448825	0.464264	0.179772	0.190542	0.180608	0.12409	0.195286	0.188079
																						0.041007	0.312981	0.372293	0.043151		270.01	0.452844	0.466506	0.180549	0.186714	0.178764	0.12775	0.194997	0.195701
																						0.076546	0.097024	1.20693	0.032364		270.22	0.451001	0.467324	0.178844	0.189577	0.176733	0.121851	0.196221	0.188857
																						0.143068	0.082418	0.091393	0.316084		270.42	0.450306	0.468766	0.180871	0.191262	0.175051	0.120437	0.192269	0.190881
																						0.375441	0.203438	0.228483	0.036679		270.61	0.452656	0.460633	0.183643	0.190896	0.180045	0.122643	0.196013	0.191186
																						0.098416	0.708381	0.139778	0.153187		270.81	0.452533	0.463096	0.178898	0.188292	0.176409	0.127317	0.194732	0.194709
																						0.15127	0.118933	0.377669	0.031285		271.01	0.453627	0.466661	0.179215	0.184595	0.181362	0.121943	0.195992	0.193741
																						0.296161	0.11163	0.215043	0.049624		271.21	0.454615	0.463903	0.180957	0.189424	0.178665	0.127343	0.195982	0.19374
																						0.15856	0.264991	0.291652	0.066885		271.4	0.449872	0.464974	0.177954	0.189232	0.178388	0.124489	0.195109	0.194572
																						0.161294	0.43713	0.422021	0.0356		271.62	0.453624	0.467049	0.177252	0.18784	0.177537	0.123614	0.193708	0.190683
																						0.148536	0.087635	0.13037	0.047466		271.81	0.454625	0.467304	0.181775	0.187714	0.180491	0.125101	0.195917	0.196003
																						0.704407	0.126236	0.065857	0.067963		271.99	0.449005	0.466322	0.180987	0.191881	0.179293	0.12327	0.193166	0.196255
																						0.042829	0.050077	1.36552	0.049624		272.21	0.451286	0.467514	0.179153	0.189097	0.174365	0.120053	0.192501	0.193075
																						0.046474	0.037558	0.036288	0.055018		272.42	0.451487	0.467938	0.180909	0.190037	0.177524	0.123611	0.193192	0.190351
																						0.13669	0.374534	0.198915	0.087381		272.6	0.450031	0.466279	0.180028	0.190642	0.178036	0.124163	0.196432	0.193832
																						0.140335	0.081375	0.049729	0.033442		272.81	0.448611	0.468745	0.17794	0.19302	0.178322	0.120838	0.192614	0.187212
																						0.464745	0.025039	0.032256	0.032364		273.01	0.451636	0.466906	0.181841	0.188145	0.179628	0.121836	0.194204	0.192743
																						0.069256	0.267077	0.603464	0.062569		273.2	0.452532	0.466515	0.182344	0.191274	0.176164	0.125532	0.196224	0.192427
																						0.069256	0.571712	0.174722	0.02697		273.41	0.447402	0.4643	0.179553	0.190379	0.181993	0.122549	0.196694	0.197614
																						0.227816	0.373491	0.970381	0.02697		273.62	0.453724	0.464859	0.180007	0.187046	0.178585	0.125178	0.191026	0.19083
																						0.089304	0.279597	0.196227	0.038836		273.8	0.452815	0.46599	0.182554	0.19016	0.179672	0.127368	0.193387	0.191014
																						0.15856	0.090765	0.119618	0.04423		274.01	0.450106	0.467736	0.186096	0.190389	0.180965	0.119256	0.195759	0.19221
																						0.215058	0.1085	0.336004	0.032364		274.21	0.450446	0.468131	0.182004	0.191535	0.178791	0.122167	0.196557	0.192027
																						0.042829	0.066769	2.2808	0.049624		274.4	0.453018	0.468928	0.182633	0.18892	0.179297	0.124963	0.198602	0.194003
																						0.467478	0.163794	0.029568	0.047466		274.62	0.454076	0.467922	0.180054	0.189625	0.177268	0.122332	0.194126	0.195089
																						0.107529	0.028168	0.044353	0.02697		274.8	0.453005	0.468532	0.180752	0.192053	0.179794	0.122984	0.197996	0.193356
																						0.024604	0.037558	0.061825	0.038836		275.01	0.452098	0.469713	0.182508	0.191198	0.183643	0.125482	0.198081	0.194285
																						0.380908	0.426698	0.034944	0.059333		275.21	0.454508	0.465371	0.18119	0.189285	0.177113	0.120122	0.199685	0.190972
																						0.532178	0.119976	0.107521	0.025891		275.4	0.451904	0.466185	0.187481	0.188977	0.176627	0.126638	0.192032	0.194111
																						0.116642	0.376621	0.034944	0.235175		275.6	0.453751	0.463019	0.185619	0.188761	0.180977	0.12292	0.196432	0.196884
																						0.515775	0.11476	0.96366	0.053443		275.82	0.456285	0.471075	0.18613	0.188851	0.178735	0.128399	0.193949	0.195924
																						0.024604	0.10537	0.482502	0.030251		276.02	0.451264	0.468173	0.184128	0.190707	0.179708	0.127068	0.196662	0.19245
																						0.10844	0.267077	1.12898	0.062518		276.21	0.451692	0.471351	0.182063	0.192335	0.17896	0.121137	0.198275	0.192588
																						0.039184	0.094938	0.279556	0.054451		276.41	0.451086	0.466175	0.18028	0.186558	0.182672	0.121695	0.197836	0.191856
																						0.065611	0.031298	0.037632	0.043359		276.61	0.447841	0.46643	0.18396	0.19118	0.175884	0.124821	0.194109	0.194361
																						0.505751	0.038601	0.0336	0.090752		276.82	0.454899	0.473396	0.182506	0.190251	0.181145	0.123254	0.195318	0.195355
																						0.026427	0.029212	0.267459	0.035292		277.02	0.453239	0.471808	0.183674	0.19048	0.177704	0.124261	0.196116	0.191966
																						0.09386	0.025039	1.46901	0.037309		277.21	0.451267	0.470309	0.18172	0.191332	0.180478	0.125383	0.197195	0.19292
																						0.199567	0.035471	0.055105	0.031259		277.41	0.455058	0.468491	0.182563	0.192645	0.179987	0.119572	0.196012	0.194596
																						0.174051	0.085548	0.075265	0.0242		277.61	0.454853	0.47165	0.180257	0.189268	0.179745	0.122791	0.193937	0.197051
																						0.257888	0.046947	0.060481	0.041342		277.81	0.454735	0.469675	0.182995	0.192799	0.180898	0.12291	0.198642	0.197811
																						0.614192	0.045904	0.024192	0.052434		278.02	0.454087	0.470791	0.184714	0.189614	0.181475	0.123869	0.197128	0.194951
																						0.0647	0.05425	0.092737	0.084702		278.22	0.454455	0.471182	0.185147	0.191025	0.183216	0.125724	0.194652	0.19453
																						0.249686	0.32863	0.061825	0.048401		278.41	0.456021	0.470673	0.182759	0.194029	0.178581	0.121085	0.192468	0.195141
																						0.130311	0.086591	0.145154	0.228896		278.61	0.454131	0.46982	0.185346	0.191149	0.182145	0.122629	0.199589	0.194401
																						0.578653	0.05425	0.037632	0.046384		278.8	0.453041	0.466572	0.181777	0.188411	0.180962	0.124296	0.196393	0.196473
																						0.051031	0.031298	0.024192	0.086718		279.02	0.452364	0.473053	0.184096	0.191895	0.182719	0.126188	0.196131	0.194217
																						0.195922	0.138755	0.594056	0.095793		279.22	0.452256	0.471559	0.185303	0.192321	0.180308	0.125045	0.198238	0.196288
																						0.030983	0.139798	1.22037	0.060501		279.4	0.454917	0.470724	0.183827	0.189917	0.1813	0.125498	0.196199	0.197704
																						0.032806	0.426698	0.044353	0.070585		279.61	0.451099	0.471528	0.185145	0.190652	0.17849	0.12431	0.198542	0.193588
																						0.164939	0.306722	0.088705	0.029242		279.81	0.45584	0.474385	0.183226	0.197395	0.18407	0.122567	0.199115	0.19673
																						0.092949	0.035471	0.025536	0.026217		280	0.452149	0.470422	0.183137	0.194574	0.17982	0.127716	0.200213	0.199479
																						0.042829	0.058423	0.056449	0.042351		280.22	0.454566	0.469364	0.184569	0.19294	0.180019	0.124068	0.197074	0.196664
																						0.407335	0.473645	0.112898	0.046384		280.42	0.456106	0.4714	0.183412	0.190693	0.178819	0.12632	0.197539	0.196912
																						0.410069	0.059466	0.029568	0.025209		280.61	0.453277	0.469251	0.183589	0.194028	0.185197	0.129289	0.195549	0.192645
																						0.089304	0.136669	0.052417	0.075626		280.81	0.455356	0.472258	0.18362	0.191445	0.182529	0.123589	0.198817	0.197888
																						0.668868	0.067813	0.044353	0.133103		281.01	0.453384	0.471625	0.181594	0.195229	0.176071	0.124632	0.197955	0.193871
																						0.292516	0.121019	0.104833	0.034284		281.2	0.449881	0.471318	0.185971	0.189121	0.184445	0.12532	0.196207	0.194067
																						0.492994	0.1085	0.025536	0.038317		281.42	0.453031	0.46978	0.184944	0.189677	0.180906	0.125258	0.196673	0.191683
																						0.030072	0.062596	0.118274	0.028234		281.6	0.453361	0.46956	0.182789	0.194103	0.182918	0.123432	0.197746	0.194626
																						0.026427	0.033385	0.045697	0.092768		281.81	0.45201	0.476215	0.184013	0.193616	0.181598	0.121055	0.200319	0.197301
																						0.032806	0.195092	0.028224	0.07361		282.01	0.458918	0.478072	0.18176	0.192103	0.183599	0.125438	0.195427	0.197092
																						0.071079	0.190919	0.086017	0.053443		282.2	0.455888	0.472479	0.182861	0.190046	0.18066	0.12497	0.195373	0.197005
																						0.195922	0.036514	0.030912	0.0242		282.4	0.454896	0.472107	0.186573	0.193351	0.180151	0.124541	0.19573	0.191052
																						0.063788	0.142928	0.060481	0.052434		282.62	0.454842	0.47489	0.182944	0.191566	0.181158	0.123675	0.196605	0.196826
																						0.0647	0.039644	0.053761	0.037309		282.81	0.455212	0.475612	0.183537	0.190915	0.18168	0.130477	0.196028	0.194368
																						0.081102	0.029212	0.067201	0.049409		283.01	0.45891	0.470144	0.18324	0.193112	0.184685	0.123787	0.196465	0.195319
																						0.045563	0.516419	0.075265	0.063526		283.21	0.457789	0.474521	0.186512	0.192875	0.182314	0.121319	0.202235	0.196764
																						0.10115	0.045904	0.053761	0.082685		283.41	0.451797	0.472147	0.187384	0.188711	0.181127	0.1229	0.198678	0.195043
																						0.069256	0.052164	0.030912	0.039326		283.62	0.459417	0.472317	0.179918	0.194481	0.184608	0.12596	0.199606	0.195888
																						0.083836	0.068856	0.036288	0.051426		283.8	0.456638	0.474899	0.183455	0.19633	0.179491	0.123996	0.20014	0.194341
																						0.053765	0.075115	0.029568	0.258138		284.01	0.452178	0.471671	0.184956	0.193069	0.182755	0.126519	0.199361	0.195404
																						0.248775	0.082418	0.045697	0.040334		284.21	0.453419	0.468873	0.185489	0.191976	0.179264	0.127374	0.198657	0.194718
																						0.21597	0.083462	0.029257	0.029242		284.4	0.453703	0.47494	0.183928	0.194174	0.180495	0.125723	0.199255	0.195651
																						0.10844	0.215957	0.030382	0.038317		284.61	0.454651	0.473962	0.187586	0.195071	0.180551	0.125178	0.199429	0.198088
																						0.297072	0.247255	0.027006	0.100835		284.82	0.455569	0.471645	0.184706	0.19371	0.186797	0.123279	0.198898	0.199873
																						0.159471	0.026082	0.033758	0.161336		285.01	0.455883	0.470098	0.185313	0.193891	0.183496	0.126202	0.197498	0.196072
																						0.583209	0.056337	0.059639	0.039326		285.21	0.455681	0.479839	0.183738	0.195152	0.182799	0.1285	0.19826	0.194511
																						0.121198	0.037558	0.086645	0.055459		285.41	0.454153	0.474069	0.186635	0.193422	0.184295	0.123596	0.199076	0.197555
																						0.032806	0.085548	0.055138	0.381157		285.6	0.454961	0.474864	0.187676	0.193748	0.183793	0.124678	0.200331	0.198039
																						0.051942	0.112673	1.38632	0.026217		285.82	0.455197	0.476085	0.187049	0.192464	0.182183	0.127436	0.19951	0.194847
																						0.100239	0.121019	0.378087	0.381157		286.02	0.458546	0.474157	0.187942	0.191065	0.179767	0.127655	0.20235	0.196341
																						0.056498	0.086591	0.037134	0.623162		286.21	0.45644	0.473854	0.187302	0.192736	0.186625	0.124443	0.198821	0.198067
																						0.076546	0.062596	0.076518	0.617111		286.41	0.459328	0.477391	0.188986	0.194312	0.180774	0.123983	0.198436	0.19852
																						0.042829	0.186745	0.286941	0.052434		286.61	0.459127	0.474763	0.183498	0.195195	0.182989	0.127181	0.199631	0.19826
																						0.077457	0.070942	0.1069	0.180495		286.8	0.456825	0.477299	0.186455	0.193056	0.179028	0.122715	0.198044	0.198501
																						0.08657	0.035471	1.42008	0.028234		287.02	0.453459	0.475267	0.184608	0.195079	0.182678	0.121972	0.202424	0.194033
																						0.031894	0.070942	0.176666	0.044367		287.22	0.453756	0.471773	0.18705	0.194012	0.183378	0.127197	0.200843	0.197947
																						0.277936	0.297332	0.043885	0.055459		287.39	0.456889	0.474314	0.187308	0.193278	0.180106	0.124532	0.197342	0.200263
																						0.032806	0.026082	0.046136	0.037309		287.61	0.454691	0.476112	0.18698	0.195816	0.185117	0.124427	0.199966	0.200422
																						0.359038	0.134582	0.028132	0.033276		287.81	0.456956	0.478554	0.186643	0.193167	0.182129	0.122419	0.202104	0.194997
																						0.518509	0.068856	0.072017	0.044367		288	0.454867	0.47747	0.184729	0.195956	0.181396	0.125284	0.199896	0.194477
																						0.035539	0.066769	0.031507	0.082685		288.22	0.459011	0.477417	0.185433	0.195124	0.183321	0.126162	0.202091	0.198842
																						0.199567	0.084505	0.055138	0.038317		288.41	0.454881	0.473017	0.186156	0.191285	0.180085	0.123503	0.200872	0.197236
																						0.034628	0.129366	0.159787	0.308556		288.59	0.454419	0.474897	0.186676	0.196319	0.182629	0.127659	0.199734	0.192683
																						0.202301	0.163794	0.2183	0.066551		288.81	0.456742	0.475051	0.184892	0.196474	0.184946	0.126095	0.197656	0.19616
																						0.025515	0.06051	0.515369	0.166378		289.01	0.459344	0.47459	0.184227	0.196706	0.184285	0.124962	0.203116	0.194934
																						0.076546	0.434001	0.444478	0.664504		289.22	0.452455	0.477584	0.189953	0.196401	0.185647	0.124094	0.199801	0.197952
																						0.10115	0.05738	0.038259	0.0242		289.42	0.459244	0.475811	0.185558	0.191469	0.185945	0.12623	0.198945	0.197964
																						0.197744	0.068856	0.075392	0.041342		289.61	0.459702	0.47757	0.185788	0.195016	0.186437	0.128144	0.200443	0.199963
																						0.178608	0.16275	0.08552	0.108902		289.81	0.457803	0.478614	0.184859	0.191805	0.182293	0.126388	0.196436	0.191907
																						0.027338	0.22639	1.7464	0.173437		290.01	0.461411	0.476904	0.188597	0.196046	0.185464	0.123878	0.199105	0.198733
																						0.266089	0.046947	0.288067	0.057476		290.21	0.461035	0.475184	0.184763	0.196344	0.181321	0.125709	0.199626	0.19844
																						0.072901	0.124149	0.209298	0.050418		290.42	0.45254	0.477238	0.191004	0.197382	0.183402	0.124853	0.199869	0.197288
																						0.463833	0.139798	0.168789	0.117977		290.6	0.460066	0.476483	0.184897	0.197512	0.184981	0.124714	0.200644	0.196741
																						0.327144	0.161707	0.06639	0.086718		290.81	0.456177	0.478088	0.187875	0.193821	0.184809	0.127647	0.198871	0.197017
																						0.174963	0.198221	0.292568	0.370065		291.01	0.453237	0.477491	0.184294	0.194327	0.183628	0.125453	0.198473	0.198243
																						0.197744	0.196135	0.028132	0.077643		291.21	0.455099	0.477319	0.186167	0.195713	0.184623	0.125246	0.195832	0.199218
																						0.035539	0.055293	0.030382	0.078651		291.42	0.457687	0.478097	0.187917	0.196769	0.185118	0.129002	0.206103	0.203638
																						0.257888	0.06051	0.400593	1.04768		291.62	0.459385	0.477714	0.184314	0.198773	0.184416	0.127066	0.202839	0.198656
																						0.042829	0.023995	0.04501	0.582827		291.79	0.458453	0.477208	0.187786	0.194393	0.182276	0.1246	0.200469	0.197848
																						0.046474	0.141885	0.136156	0.051426		292.01	0.458283	0.476172	0.189405	0.193624	0.18458	0.124764	0.198729	0.199285
																						0.052853	0.266034	1.01723	0.577786		292.21	0.457914	0.476681	0.185868	0.19718	0.185324	0.127037	0.20067	0.19784
																						0.120287	0.370361	0.154161	1.0386		292.4	0.454849	0.477445	0.188742	0.198307	0.185118	0.12662	0.198977	0.198313
																						0.248775	0.071986	0.214925	0.086718		292.62	0.460441	0.476005	0.188807	0.19786	0.185621	0.129585	0.20267	0.196792
																						0.040096	0.236822	0.056263	0.072601		292.82	0.456424	0.479883	0.187768	0.194786	0.184787	0.127533	0.201395	0.198969
																						0.061966	0.287943	0.25881	0.138144		292.99	0.45705	0.478282	0.188827	0.196236	0.185596	0.125696	0.203203	0.19972
																						0.052853	0.029212	0.118152	0.041342		293.21	0.459199	0.473954	0.188484	0.193954	0.184391	0.124181	0.204171	0.199528
																						0.035539	0.081375	1.12414	0.049409		293.41	0.455959	0.47881	0.190234	0.194083	0.18437	0.129676	0.200137	0.19825
																						0.05012	0.062596	0.06639	0.20167		293.6	0.457772	0.479276	0.185495	0.197453	0.186134	0.131836	0.197583	0.200715
																						0.048297	0.198221	0.067516	0.055459		293.8	0.457915	0.476892	0.184014	0.194705	0.186779	0.128197	0.198269	0.197225
																						0.13669	0.094938	0.067516	0.113944		294.01	0.458643	0.479902	0.188469	0.197681	0.184982	0.126179	0.205315	0.19949
																						0.02889	0.028168	1.07687	0.071593		294.21	0.45889	0.477638	0.185619	0.193736	0.188955	0.128103	0.204978	0.1986
																						0.108627	0.158577	1.23441	0.450733		294.41	0.460715	0.478964	0.190369	0.194788	0.183141	0.125179	0.204169	0.199686
																						0.248454	0.026082	0.399467	0.030251		294.61	0.458512	0.474939	0.190145	0.196355	0.182046	0.124468	0.200306	0.195718
																						0.078581	0.080332	0.04501	0.289397		294.8	0.457126	0.477986	0.187673	0.194676	0.183057	0.126866	0.201032	0.20045
																						0.025423	0.083462	0.093397	0.025209		295.02	0.457681	0.478685	0.185069	0.19842	0.184593	0.126509	0.202274	0.20078
																						0.123649	0.084505	0.025881	0.052434		295.21	0.459901	0.478148	0.189732	0.196048	0.18563	0.125538	0.2024	0.201982
																						0.258855	0.058423	0.508618	1.087		295.4	0.454911	0.479348	0.18859	0.195346	0.180755	0.131257	0.202842	0.196221
																						0.201075	0.04799	0.290317	0.141169		295.61	0.460148	0.4787	0.188168	0.200142	0.182257	0.127066	0.201467	0.201604
																						0.104004	0.398529	0.067516	0.050418		295.82	0.46069	0.479505	0.188301	0.196324	0.181543	0.131248	0.199366	0.201077
																						0.566244	0.101197	2.8109	0.247046		296.02	0.461865	0.479242	0.185769	0.196415	0.185638	0.125876	0.204552	0.198507
																						0.033512	0.15962	0.302695	0.048401		296.21	0.456346	0.478855	0.189614	0.199177	0.186402	0.125632	0.199899	0.201287
																						0.071647	0.027125	0.12828	0.035292		296.41	0.455527	0.477438	0.18983	0.193755	0.186279	0.130616	0.203717	0.198473
																						0.160629	0.043817	0.040509	0.058484		296.61	0.456618	0.479029	0.191153	0.194926	0.184045	0.12782	0.201191	0.197769
																						0.04738	0.080332	0.031507	0.038317		296.81	0.461619	0.478388	0.186727	0.196332	0.18584	0.128384	0.202601	0.199925
																						0.041602	0.044861	0.031507	0.054451		297.02	0.461247	0.480342	0.188111	0.200273	0.185024	0.129524	0.205386	0.202876
																						0.216097	0.137712	0.1069	0.065543		297.2	0.460064	0.479822	0.190293	0.198331	0.185529	0.127883	0.204669	0.200333
																						0.300456	0.115803	0.043885	0.07966		297.41	0.462763	0.479394	0.18851	0.19681	0.187745	0.122575	0.20224	0.198292
																						0.064714	0.056337	0.028132	0.080668		297.61	0.461042	0.480236	0.187509	0.19888	0.188208	0.12963	0.205141	0.196955
																						0.077425	0.065726	0.061889	0.037309		297.81	0.458609	0.478508	0.190232	0.198783	0.185935	0.124789	0.200874	0.197166
																						0.767319	0.113717	1.41558	0.186545		298	0.461275	0.479429	0.188097	0.200292	0.186868	0.126687	0.199399	0.199695
																						0.052002	0.151274	0.142908	0.038317		298.22	0.462369	0.47975	0.1909	0.199985	0.183924	0.125008	0.202901	0.198374
																						0.160629	0.078245	0.162037	0.055459		298.4	0.458351	0.481161	0.185993	0.199072	0.191759	0.131843	0.201248	0.202047
																						0.177963	0.171096	0.095647	0.060501		298.59	0.460998	0.477606	0.188594	0.199642	0.185053	0.127376	0.203336	0.195261
																						0.083203	0.127279	0.131655	0.791556		298.81	0.462911	0.478199	0.191936	0.19494	0.184736	0.128635	0.20063	0.199611
																						0.310857	0.032341	0.032633	0.126044		299.01	0.456311	0.48151	0.191329	0.196925	0.185512	0.128185	0.203918	0.197927
																						0.05778	0.097024	0.094522	0.178478		299.2	0.457321	0.482174	0.18766	0.198545	0.187761	0.129152	0.202624	0.198566
																						0.106315	0.135625	2.33154	0.15327		299.42	0.459849	0.478982	0.190867	0.196784	0.187027	0.125802	0.201352	0.204093
																						0.807765	0.28064	0.057388	0.045376		299.61	0.463829	0.4779	0.191383	0.195427	0.187597	0.127473	0.203685	0.202607
																						0.025423	0.152318	0.076518	0.047393		299.79	0.465836	0.481203	0.190119	0.197888	0.183785	0.125092	0.205752	0.200538
																						0.035824	0.034428	0.027006	0.052434		300.01	0.456306	0.477459	0.191002	0.195802	0.188393	0.129297	0.205091	0.202926
																						0.10516	0.029212	0.105774	0.046384		300.21	0.459483	0.484012	0.19059	0.196694	0.184044	0.127033	0.204157	0.200901
																						0.223031	0.065726	0.077643	0.066551		300.4	0.460479	0.480662	0.186974	0.199727	0.187387	0.131605	0.203456	0.195817
																						0.78812	0.070942	0.08777	0.025209		300.62	0.457698	0.482637	0.190524	0.197482	0.185448	0.127362	0.2036	0.196572
																						0.49922	0.156491	0.051762	0.448717		300.81	0.46024	0.48096	0.188279	0.202088	0.18386	0.125868	0.205974	0.200942
																						0.032357	0.16275	0.052887	0.267213		300.99	0.465978	0.482643	0.194169	0.198289	0.184917	0.131369	0.199919	0.199787
																						0.027734	0.073029	0.059639	0.088735		301.21	0.459796	0.481609	0.19229	0.198219	0.187283	0.127834	0.203194	0.200748
																						0.05778	0.106414	0.155286	0.058484		301.42	0.457874	0.481139	0.188978	0.200745	0.188466	0.12878	0.202544	0.199221
																						0.227653	0.076159	0.286941	0.026217		301.6	0.457605	0.481446	0.191842	0.199882	0.185154	0.129344	0.202266	0.203287
																						0.216097	0.055293	0.069299	0.117977		301.81	0.453677	0.48345	0.189778	0.19847	0.186227	0.124334	0.20469	0.199282
																						0.129427	0.174226	0.102484	0.052434		302.01	0.460876	0.483041	0.189484	0.199028	0.187206	0.128295	0.203871	0.200687
																						0.139828	0.030255	0.025377	0.041342		302.2	0.463096	0.483201	0.19164	0.198339	0.19176	0.130964	0.206399	0.202372
																						0.168718	0.084505	0.037089	1.75756		302.41	0.465164	0.480842	0.189539	0.201043	0.18641	0.127586	0.204337	0.200113
																						0.078581	0.053207	0.072227	0.936759		302.62	0.460851	0.484966	0.193434	0.197595	0.187376	0.130432	0.199994	0.202035
																						0.046224	0.139798	0.094676	0.045376		302.8	0.459369	0.484232	0.189673	0.199831	0.185885	0.12611	0.203039	0.1986
																						0.227653	0.061553	0.035137	0.048401		303.01	0.462406	0.481765	0.190011	0.201735	0.18522	0.128074	0.205137	0.201226
																						0.14445	0.050077	0.04197	0.142178		303.21	0.459756	0.483603	0.187784	0.199206	0.190769	0.127705	0.203684	0.204182
																						0.099382	0.023995	0.05173	0.030251		303.41	0.463094	0.481611	0.190346	0.198312	0.189316	0.126955	0.205203	0.20063
																						0.729184	0.028168	0.088819	0.082685		303.62	0.46116	0.483589	0.190696	0.196497	0.189336	0.128817	0.20448	0.200362
																						0.104004	0.089721	0.117125	0.380149		303.82	0.462407	0.481004	0.191589	0.199929	0.186548	0.126201	0.202798	0.201407
																						0.238054	0.052164	0.042946	0.285364		304.01	0.463908	0.48386	0.189235	0.200025	0.188529	0.126496	0.206868	0.200924
																						0.385971	0.146058	0.530965	0.604003		304.21	0.46204	0.484859	0.191112	0.199096	0.188269	0.13109	0.201956	0.200554
																						0.042757	0.127279	0.031233	0.061509		304.41	0.463419	0.483936	0.191434	0.198601	0.190227	0.124358	0.204754	0.202603
																						0.171029	0.040688	0.055634	0.032267		304.61	0.45916	0.483147	0.189299	0.198803	0.186398	0.127132	0.204403	0.202608
																						0.034668	0.101197	0.102484	0.043359		304.8	0.461821	0.483638	0.189433	0.201968	0.186807	0.131418	0.205743	0.202701
																						0.152539	0.035471	0.567078	0.047393		305.02	0.461248	0.484829	0.188047	0.197578	0.187745	0.128055	0.203506	0.200383
																						0.069336	0.056337	0.183495	0.074618		305.21	0.462536	0.489278	0.189653	0.20067	0.184463	0.127762	0.202076	0.204194
																						0.058936	0.058423	0.079059	0.080668		305.39	0.459504	0.487018	0.190139	0.201302	0.189479	0.127747	0.203833	0.201084
																						0.062402	0.045904	0.752526	0.09781		305.61	0.466069	0.484237	0.188422	0.200558	0.185362	0.129705	0.206267	0.201763
																						0.156006	0.055293	0.026353	0.043359		305.82	0.462247	0.483767	0.192133	0.198612	0.185088	0.125553	0.200473	0.203426
																						0.079736	0.163794	0.036113	0.031259		306	0.46369	0.483209	0.191687	0.198972	0.188033	0.132749	0.202402	0.202664
																						0.08667	0.202395	0.036113	0.0242		306.21	0.466854	0.48407	0.191636	0.199708	0.189276	0.128095	0.205284	0.203924
																						0.03929	0.090765	0.136645	0.261163		306.41	0.459751	0.485427	0.186077	0.19786	0.189265	0.128106	0.20472	0.201373
																						0.045068	0.032341	0.085891	0.610053		306.6	0.46523	0.484441	0.191954	0.199476	0.186635	0.129056	0.205666	0.202241
																						0.113249	0.04799	0.159094	0.025209		306.81	0.460948	0.483142	0.189449	0.199258	0.191062	0.131552	0.205277	0.203188
																						0.070492	0.04799	0.171783	0.040334		307.02	0.46107	0.485918	0.188172	0.199503	0.190008	0.130403	0.203349	0.202684
																						0.088981	0.181529	0.132741	0.035292		307.2	0.464596	0.485452	0.195588	0.202983	0.188454	0.128047	0.205072	0.202106
																						0.025423	0.071986	0.081987	0.071593		307.41	0.460122	0.486352	0.192659	0.197217	0.188844	0.132705	0.206372	0.204297
																						0.075114	0.074072	3.68845	0.041342		307.61	0.460315	0.486208	0.192598	0.200376	0.186201	0.128174	0.206557	0.203127
																						0.048535	0.027125	1.38109	0.025209		307.8	0.462996	0.482087	0.190357	0.199667	0.1914	0.130574	0.205947	0.203797
																						0.034668	0.034428	0.314284	0.048401		308.02	0.461618	0.487083	0.1888	0.199713	0.190088	0.131564	0.20464	0.202374
																						0.112093	0.089721	0.614904	0.060501		308.22	0.458178	0.487291	0.192297	0.198081	0.190533	0.128078	0.207355	0.202699
																						0.031201	0.025762	0.984823	0.037309		308.4	0.461604	0.484989	0.189658	0.20129	0.192498	0.124382	0.20454	0.201617
																						0.150228	0.025762	0.314284	0.0242		308.61	0.46452	0.485442	0.194646	0.202439	0.192809	0.130466	0.208452	0.200328
																						0.048535	0.031896	0.523157	0.055459		308.81	0.461499	0.487353	0.192224	0.200301	0.185867	0.13314	0.206415	0.202042
																						0.026579	0.085875	0.040018	0.025209		309.01	0.462416	0.484998	0.194442	0.194612	0.188045	0.128338	0.206194	0.2018
																						0.034668	0.033123	0.309404	0.089743		309.22	0.462817	0.483611	0.193524	0.203129	0.187217	0.130799	0.202825	0.204161
																						0.035824	0.028216	0.06149	0.052434		309.42	0.464664	0.484526	0.191061	0.201712	0.189283	0.128992	0.204631	0.204145
																						0.040446	0.026989	0.274267	0.036301		309.61	0.465087	0.484872	0.191253	0.199383	0.190606	0.128447	0.207671	0.20426
																						0.075114	0.030669	0.445074	0.033276		309.81	0.462337	0.483061	0.192547	0.200659	0.180406	0.129074	0.205191	0.200696
																						0.085514	0.03435	0.116149	0.031259		310.01	0.46222	0.490266	0.191218	0.20173	0.189477	0.133712	0.209474	0.200975
																						0.130583	0.07606	0.105412	0.169403		310.21	0.461605	0.486968	0.190698	0.201083	0.187985	0.133073	0.206604	0.201665
																						0.123649	0.084648	0.550486	0.030251		310.4	0.463249	0.484524	0.196104	0.20077	0.189231	0.131037	0.205949	0.204246
																						0.040446	0.029443	0.209848	0.044367		310.62	0.462033	0.484122	0.189376	0.20057	0.187894	0.128964	0.203533	0.202811
																						0.062402	0.055205	0.060514	0.041342		310.81	0.466599	0.489047	0.193131	0.20359	0.191798	0.125587	0.201499	0.201462
																						0.069336	0.114091	1.67	0.030251		310.99	0.464798	0.486395	0.190305	0.201624	0.191632	0.12847	0.206918	0.206662
																						0.098226	0.042937	0.238153	0.056468		311.21	0.461093	0.485956	0.190135	0.19895	0.189431	0.131101	0.205624	0.204317
																						0.048535	0.317736	0.329901	0.035292		311.42	0.468107	0.485455	0.191322	0.203441	0.183806	0.126505	0.204431	0.199992
																						0.03929	0.041711	0.256698	0.030251		311.6	0.46259	0.490597	0.193511	0.199981	0.187915	0.131362	0.207334	0.202789
																						0.050846	0.060112	0.308428	0.066551		311.81	0.464254	0.487419	0.191731	0.198744	0.184945	0.129813	0.207505	0.201899
																						0.082606	0.029443	0.112244	0.025209		312.01	0.460495	0.483968	0.19173	0.204128	0.189088	0.131066	0.203495	0.202165
																						0.026617	0.061339	0.058562	0.080668		312.2	0.462099	0.487081	0.192826	0.204473	0.190342	0.132083	0.204472	0.202959
																						0.068838	0.07238	0.071251	0.112935		312.41	0.464949	0.487112	0.190599	0.203537	0.192977	0.131375	0.202292	0.205649
																						0.157869	0.094462	0.410912	0.025209		312.62	0.463094	0.486803	0.193428	0.200692	0.189605	0.130968	0.204485	0.204885
																						0.40844	0.17543	0.551462	0.049409		312.8	0.461583	0.488053	0.189774	0.200466	0.189868	0.129828	0.20458	0.200807
																						0.041303	0.030669	0.796447	0.043359		313.01	0.462225	0.48818	0.194691	0.203915	0.183869	0.130648	0.203277	0.20639
																						0.051399	0.024536	1.02191	0.051426		313.21	0.462608	0.489076	0.192029	0.202789	0.190586	0.131203	0.208201	0.202806
																						0.225789	0.058885	1.43282	0.056468		313.4	0.461628	0.486821	0.191388	0.201065	0.186817	0.127365	0.20632	0.206917
																						0.045892	0.042937	0.311356	0.053443		313.61	0.462349	0.486446	0.190672	0.202336	0.187901	0.13006	0.205245	0.202109
																						0.10188	0.024536	0.049778	0.084702		313.82	0.463167	0.489909	0.193253	0.201982	0.187481	0.132398	0.204782	0.201418
																						0.215693	0.073607	0.032209	0.037309		314.01	0.467078	0.48667	0.192298	0.202116	0.189142	0.132233	0.204695	0.205089
																						0.126662	0.03435	0.292812	0.032267		314.21	0.46288	0.487414	0.190738	0.2013	0.188966	0.12912	0.203085	0.202033
																						0.146855	0.028216	0.044898	0.107894		314.41	0.463404	0.491444	0.19316	0.198091	0.19362	0.129131	0.207363	0.200307
																						0.054153	0.049071	0.052706	0.082685		314.6	0.462827	0.490823	0.191444	0.203789	0.189782	0.13097	0.206318	0.204127
																						0.075263	0.069926	0.026353	0.038317		314.82	0.463491	0.488922	0.191498	0.202651	0.191272	0.132496	0.204927	0.200381
																						0.049563	0.155801	0.043922	0.044367		315.02	0.460676	0.488269	0.190955	0.196531	0.190729	0.128029	0.20894	0.205671
																						0.18724	0.024536	0.04197	0.045376		315.21	0.464129	0.487972	0.189856	0.201752	0.186541	0.127375	0.204985	0.202923
																						0.040385	0.051525	0.05173	0.044367		315.41	0.465532	0.490947	0.193846	0.203068	0.193044	0.129837	0.209148	0.202445
																						0.234967	0.033123	0.029281	0.0242		315.61	0.466721	0.48821	0.192802	0.203509	0.188613	0.129219	0.209065	0.204138
																						0.044056	0.093235	0.470451	0.030251		315.82	0.461125	0.489268	0.195303	0.205022	0.193948	0.129765	0.207348	0.205644
																						0.150526	0.026989	0.083939	0.039326		316.02	0.465917	0.485104	0.196368	0.201962	0.191942	0.12731	0.208236	0.205464
																						0.024782	0.040484	0.034161	0.028234		316.22	0.463078	0.487865	0.188285	0.203774	0.1883	0.130249	0.207927	0.20396
																						0.218446	0.049071	0.40896	0.113944		316.41	0.468078	0.488102	0.193099	0.2042	0.190478	0.128209	0.209305	0.201456
																						0.062413	0.036803	0.360158	0.028234		316.61	0.460508	0.489021	0.190894	0.199532	0.188491	0.130103	0.206801	0.207185
																						0.038549	0.049071	0.254746	0.047393		316.81	0.46236	0.485173	0.194334	0.202025	0.191673	0.129578	0.205096	0.206228
																						0.063331	0.066246	0.390415	0.041342		317.02	0.462881	0.48856	0.193071	0.200668	0.192905	0.131253	0.210166	0.204599
																						0.528677	0.078514	0.079059	0.077643		317.2	0.465704	0.490036	0.194752	0.199198	0.188554	0.133013	0.208139	0.203676
																						0.06792	0.14476	0.223513	0.025209		317.41	0.465527	0.484872	0.193826	0.204391	0.187332	0.128619	0.20389	0.204239
																						0.113812	0.031896	0.154214	0.044367		317.61	0.465934	0.49102	0.194178	0.200001	0.192401	0.132513	0.20768	0.209325
																						0.17439	0.066246	0.625641	0.045376		317.8	0.465553	0.489682	0.190772	0.202691	0.191324	0.129014	0.209976	0.205489
																						0.06792	0.152121	0.101508	0.028234		318.01	0.467275	0.488479	0.194697	0.205654	0.195414	0.128962	0.205079	0.206073
																						0.244146	0.035577	0.364062	0.025209		318.22	0.464333	0.493882	0.193958	0.201471	0.191371	0.129922	0.207533	0.204455
																						0.109223	0.067473	0.095652	0.068568		318.4	0.469167	0.490687	0.191865	0.201885	0.189769	0.132878	0.206734	0.208761
																						0.302888	0.035577	0.059538	0.107894		318.61	0.464554	0.486245	0.194549	0.201068	0.190827	0.131979	0.209417	0.205095
																						0.155115	0.026989	0.047864	0.037309		318.81	0.466495	0.489315	0.19307	0.202098	0.190879	0.13246	0.20904	0.205197
																						0.311148	0.025762	0.037663	0.036301		319	0.466036	0.492119	0.195448	0.201125	0.190514	0.129833	0.207375	0.206611
																						0.532348	0.040484	0.030601	0.0242		319.21	0.46577	0.489841	0.192821	0.202736	0.193358	0.12654	0.206999	0.201322
																						0.139512	0.132492	0.026678	0.069576		319.42	0.463698	0.487559	0.193113	0.199238	0.193003	0.133387	0.206014	0.204547
																						0.18724	0.049071	0.072188	0.036301		319.6	0.463065	0.492408	0.195159	0.202172	0.19165	0.130835	0.210752	0.205166
																						0.026617	0.03435	0.058064	0.029242		319.81	0.463802	0.491081	0.196577	0.202781	0.19101	0.132444	0.208774	0.203226
																						0.041303	0.024536	0.036094	0.059493		320.01	0.468672	0.490314	0.192027	0.201039	0.188277	0.128526	0.207167	0.204579
																						0.071592	0.035577	0.05728	0.048401		320.2	0.464398	0.494447	0.193954	0.204609	0.186881	0.13126	0.205026	0.207272
																						0.065167	0.127585	0.040802	0.027226		320.42	0.467748	0.491256	0.194407	0.203095	0.192535	0.130416	0.206527	0.202841
																						0.026617	0.07238	0.099651	0.125036		320.62	0.466751	0.492473	0.189508	0.202303	0.18914	0.129763	0.210579	0.206313
																						0.190911	0.026989	0.065126	0.141169		320.81	0.46878	0.491868	0.196545	0.206501	0.187401	0.130625	0.207185	0.207244
																						0.027535	0.028216	0.043156	0.030251		321.01	0.463564	0.49096	0.1899	0.203023	0.19207	0.13551	0.208668	0.205839
																						0.119319	0.101823	0.093373	0.146211		321.21	0.466222	0.496286	0.194569	0.203461	0.193646	0.130981	0.207112	0.204318
																						0.073427	0.180337	0.088666	0.045376		321.4	0.466437	0.489702	0.193386	0.204664	0.19004	0.132949	0.208029	0.208223
																						0.142265	0.077287	0.07925	0.034075		321.62	0.468675	0.49088	0.191901	0.203246	0.190268	0.127128	0.209181	0.206718
																						0.044974	0.03803	0.029032	0.062472		321.8	0.464127	0.495711	0.194945	0.205718	0.192208	0.133022	0.209377	0.204168
																						0.288202	0.058885	1.28918	0.056792		322.01	0.465069	0.491568	0.192972	0.203746	0.190109	0.132246	0.208683	0.20342
																						0.631475	0.07238	0.130252	0.054359		322.21	0.464464	0.491234	0.194821	0.205274	0.191969	0.129524	0.205709	0.208069
																						0.038549	0.088328	0.082388	0.039755		322.41	0.466679	0.490824	0.194593	0.202555	0.18977	0.131923	0.206395	0.205948
																						0.041303	0.049071	0.05728	0.058415		322.62	0.464007	0.497434	0.194571	0.202299	0.190357	0.131375	0.208151	0.206749
																						0.042221	0.045391	0.57358	0.095736		322.82	0.465345	0.494283	0.19578	0.204471	0.19259	0.133835	0.212237	0.205513
																						0.041303	0.277252	0.07925	0.09817		323.01	0.469151	0.491025	0.197183	0.203807	0.19511	0.132718	0.206848	0.205462
																						0.078017	0.061339	0.5163	0.027585		323.21	0.465909	0.492434	0.195496	0.206385	0.190026	0.127567	0.208559	0.207582
																						0.044974	0.042937	0.154576	0.044623		323.41	0.467273	0.491477	0.19391	0.207089	0.18712	0.132368	0.205276	0.20817
																						0.295545	0.063793	0.030601	0.078698		323.61	0.464253	0.489841	0.193704	0.206049	0.192973	0.133312	0.209319	0.204748
																						0.35704	0.033123	0.171054	0.071396		323.82	0.467691	0.492385	0.196483	0.204462	0.18973	0.132546	0.208222	0.205504
																						0.040385	0.039257	0.209502	0.056792		324.01	0.466388	0.496249	0.197164	0.203518	0.191746	0.13196	0.206792	0.207818
																						0.113812	0.094462	0.128683	0.289642		324.21	0.468018	0.492274	0.191097	0.206109	0.191099	0.131021	0.210545	0.207448
																						0.677367	0.03435	1.74036	0.051113		324.41	0.469399	0.493343	0.195384	0.201662	0.197136	0.132544	0.210773	0.208028
																						0.09362	0.036803	1.04594	0.157396		324.6	0.465982	0.49118	0.194018	0.204289	0.19241	0.131754	0.209565	0.200907
																						0.068838	0.024536	0.040802	0.066528		324.82	0.467677	0.495593	0.1967	0.20594	0.194081	0.131099	0.208554	0.204429
																						0.084441	0.049071	0.026678	0.087623		325.02	0.467974	0.494637	0.196523	0.208293	0.19407	0.132127	0.211319	0.203322
																						0.177143	0.089555	0.027463	0.034887		325.21	0.467838	0.495732	0.194446	0.204605	0.191069	0.132262	0.20943	0.206407
																						0.445153	0.229408	0.529639	0.068151		325.41	0.465402	0.493836	0.195879	0.203233	0.191258	0.132285	0.208487	0.205138
																						0.449742	0.031896	0.284828	0.115208		325.61	0.466149	0.496578	0.197558	0.204862	0.194218	0.135304	0.210208	0.205483
																						0.064249	0.045391	0.106713	0.056792		325.8	0.4652	0.497221	0.198133	0.205469	0.191948	0.132945	0.208208	0.205181
																						0.067002	0.044164	1.4877	0.080321		326.02	0.467385	0.489038	0.192366	0.207778	0.194407	0.129989	0.209621	0.210165
																						0.16154	0.104276	0.296598	0.146849		326.22	0.466424	0.492582	0.197438	0.206035	0.195268	0.132543	0.209586	0.203364
																						0.354287	0.087101	0.265997	0.033264		326.41	0.469758	0.497603	0.196962	0.202947	0.19231	0.134909	0.207731	0.205343
																						0.469935	0.111637	1.34254	0.030019		326.61	0.464558	0.494856	0.193463	0.201714	0.190139	0.129233	0.206837	0.20834
																						0.185404	0.126358	0.068265	0.091679		326.81	0.468744	0.495	0.195369	0.206593	0.190265	0.134501	0.209098	0.20692
																						0.264338	0.093235	0.870963	0.051925		327	0.469162	0.494954	0.196309	0.20653	0.194371	0.129849	0.210115	0.205371
																						0.139512	0.360673	0.509238	0.03083		327.22	0.467829	0.496943	0.196572	0.205231	0.191278	0.132357	0.207568	0.208306
																						0.485538	0.028216	0.131037	0.078698		327.4	0.468245	0.493441	0.19668	0.205047	0.196088	0.130368	0.205791	0.209467
																						0.518581	0.045391	1.00749	0.074642		327.59	0.467794	0.493479	0.196356	0.20549	0.194971	0.133054	0.205588	0.207451
																						0.040385	0.139853	0.04394	0.131434		327.81	0.467335	0.491613	0.195429	0.207423	0.190254	0.132062	0.208128	0.207154
																						0.383658	0.028216	0.317784	0.050302		328.01	0.466694	0.493983	0.197565	0.204395	0.193929	0.134236	0.207229	0.209148
																						0.150526	0.041711	1.77331	0.044623		328.2	0.466513	0.496592	0.198157	0.204177	0.190611	0.128753	0.210938	0.206838
																						0.082606	0.044164	0.698339	0.034075		328.42	0.467288	0.491972	0.196475	0.207588	0.194725	0.132707	0.212043	0.204398
																						0.065167	0.082194	0.068265	0.080321		328.61	0.469073	0.493442	0.19623	0.204511	0.191992	0.133572	0.210691	0.211833
																						0.137676	0.058885	0.357016	0.037321		328.79	0.469966	0.49296	0.195428	0.202944	0.192151	0.133193	0.210784	0.206969
																						0.031207	0.036803	0.852131	0.172		329.01	0.469601	0.494954	0.197765	0.203974	0.19584	0.132096	0.209156	0.208518
																						0.098209	0.050298	0.166346	0.031642		329.21	0.468593	0.492597	0.199143	0.203866	0.195682	0.133747	0.210517	0.2037
																						0.119319	0.109183	0.21264	0.047057		329.42	0.469395	0.496849	0.194873	0.203022	0.190005	0.131241	0.211768	0.208054
																						0.078934	0.051525	0.167915	0.03083		329.62	0.4681	0.496926	0.198482	0.20254	0.193254	0.131407	0.207439	0.206568
																						0.120237	0.07606	0.262858	0.135491		329.81	0.467979	0.492823	0.194438	0.202524	0.188789	0.129551	0.213449	0.208223
																						0.104634	0.051525	0.034525	0.057604		330.01	0.471389	0.497241	0.195547	0.206667	0.195396	0.133092	0.206479	0.207368
																						0.05966	0.083421	0.331907	0.043811		330.21	0.464151	0.496796	0.199431	0.203689	0.191004	0.136154	0.20747	0.207987
																						0.321245	0.136173	0.870963	0.050302		330.42	0.469269	0.496684	0.199086	0.20708	0.193374	0.129978	0.206651	0.207943
																						0.35704	0.118998	0.050218	0.03083		330.62	0.463619	0.496822	0.196885	0.203923	0.194144	0.133162	0.20818	0.207663
																						0.108305	0.17543	0.082388	0.049491		330.79	0.467609	0.495157	0.196742	0.205461	0.193406	0.135134	0.209745	0.20629
																						0.136758	0.069926	0.310722	0.02434		331.01	0.468384	0.496085	0.198304	0.20288	0.192457	0.133429	0.209728	0.207915
																						0.071592	0.0687	0.076896	0.111962		331.21	0.467368	0.493126	0.200124	0.205182	0.192356	0.138004	0.21332	0.209991
																						0.071592	0.134946	1.08988	0.037321		331.4	0.468678	0.494963	0.194915	0.205082	0.195578	0.13272	0.210009	0.207521
																						0.162458	0.058885	0.358586	0.030019		331.62	0.466299	0.493793	0.201018	0.206629	0.192365	0.134611	0.205537	0.210084
																						0.04681	0.046618	2.28961	0.075453		331.82	0.472015	0.49414	0.196167	0.208054	0.194931	0.127815	0.210508	0.207795
																						0.044974	0.031896	0.74228	0.02434		331.99	0.468326	0.495506	0.196505	0.206711	0.196503	0.13361	0.209256	0.208302
																						0.30197	0.036803	0.07768	0.060038		332.21	0.465758	0.493931	0.193747	0.204992	0.193133	0.132713	0.21728	0.202908
																						0.064249	0.074834	0.094158	0.039755		332.41	0.466631	0.491073	0.198051	0.210037	0.194767	0.132976	0.210896	0.209216
																						0.061495	0.031896	0.193809	0.080321		332.6	0.47263	0.495212	0.198058	0.206849	0.189238	0.131736	0.208855	0.205908
																						0.094538	0.055205	0.345246	0.034887		332.82	0.47149	0.494203	0.197517	0.201896	0.194487	0.135603	0.204787	0.20811
																						0.043139	0.040484	0.102789	0.029208		333.01	0.46386	0.498129	0.200875	0.211345	0.194849	0.131728	0.209873	0.207959
																						0.042221	0.0687	0.074542	0.045434		333.19	0.47245	0.496811	0.197296	0.201757	0.194539	0.13388	0.211051	0.207733
																						0.36989	0.040484	0.028247	0.034075		333.41	0.466461	0.497555	0.197742	0.204988	0.194787	0.133177	0.209489	0.207754
																						0.112895	0.406064	0.053356	0.047868		333.61	0.468295	0.494846	0.195846	0.207316	0.197074	0.132297	0.208879	0.206728
																						0.041303	0.230635	0.05728	0.045434		333.8	0.465709	0.496186	0.199547	0.208759	0.193285	0.136861	0.213135	0.211811
																						0.228543	0.055205	0.105143	0.860812		334.02	0.469687	0.496404	0.199126	0.206831	0.193926	0.13376	0.210533	0.209853
																						0.160622	0.089555	0.028247	0.038943		334.21	0.470399	0.49579	0.195763	0.207639	0.197485	0.136383	0.210178	0.209456
																						0.134005	0.142306	0.072188	0.138736		334.39	0.471397	0.495436	0.195758	0.207863	0.194029	0.137841	0.209932	0.211528
																						0.057824	0.03803	0.107497	0.070585		334.61	0.469078	0.500609	0.197095	0.207284	0.197052	0.137057	0.212405	0.210454
																						0.050481	0.03435	0.070619	0.049491		334.82	0.472475	0.49982	0.196575	0.205639	0.196002	0.133012	0.210472	0.209597
																						0.077099	0.241676	0.189101	0.326963		335	0.472486	0.495814	0.195946	0.209811	0.199501	0.13565	0.208216	0.207881
																						0.049563	0.069926	0.096512	0.494906		335.22	0.46549	0.497014	0.198077	0.206754	0.192431	0.134738	0.212755	0.20642
																						0.037632	0.025762	0.049433	0.054359		335.41	0.468811	0.498924	0.201031	0.205225	0.195853	0.134752	0.20696	0.20781
																						0.131251	0.044164	0.072973	0.887586		335.61	0.468138	0.498355	0.195806	0.209196	0.195896	0.131964	0.213741	0.208512
																						0.04681	0.057659	0.076089	0.025151		335.81	0.471786	0.493205	0.197016	0.204523	0.196477	0.127849	0.207821	0.210342
																						0.119319	0.11041	0.038648	0.157396		336.02	0.470575	0.495275	0.198586	0.208913	0.193841	0.133011	0.211221	0.209616
																						0.088113	0.10305	0.137685	0.060038		336.22	0.471907	0.502058	0.196783	0.207557	0.197126	0.134563	0.214837	0.207908
																						0.078017	0.050298	0.071258	0.087623		336.41	0.469165	0.497158	0.19527	0.208563	0.196038	0.13706	0.213813	0.208565
																						0.057824	0.095689	0.305563	0.057604		336.61	0.467717	0.498654	0.197743	0.208492	0.195147	0.129396	0.210914	0.20751
																						0.296463	0.142306	0.026571	0.039755		336.81	0.476586	0.498619	0.193321	0.208509	0.192708	0.130849	0.211646	0.209118
																						0.044974	0.142306	0.061596	0.089245		337.02	0.46788	0.499709	0.199502	0.205368	0.195349	0.131708	0.212073	0.20768
																						0.231296	0.074834	0.033817	0.047868		337.22	0.469363	0.495737	0.196987	0.207737	0.193146	0.135419	0.210932	0.205504
																						0.060213	0.061339	0.513298	0.043		337.4	0.469271	0.499527	0.197865	0.208097	0.196668	0.131207	0.212545	0.21189
																						0.065338	0.109183	0.05918	0.068151		337.61	0.470887	0.498421	0.201259	0.206738	0.195554	0.13318	0.21096	0.209858
																						0.101209	0.025762	0.536246	0.062472		337.81	0.467501	0.502308	0.199268	0.209372	0.194964	0.136924	0.211625	0.211157
																						0.169109	0.040484	0.04831	0.055981		338.01	0.469573	0.498739	0.196761	0.207892	0.193591	0.134161	0.213974	0.206991
																						0.146049	0.184017	0.028986	0.197962		338.2	0.473567	0.497209	0.199791	0.209397	0.194948	0.133799	0.210282	0.209572
																						0.09096	0.065019	0.082128	0.068962		338.42	0.470273	0.499297	0.198431	0.209717	0.197701	0.132743	0.210561	0.208666
																						0.133238	0.118998	0.154593	0.047868		338.61	0.473248	0.495474	0.196765	0.208376	0.195328	0.134366	0.213643	0.209138
																						0.099928	0.039257	1.64739	0.399981		338.79	0.471227	0.49482	0.198991	0.208399	0.197274	0.135936	0.212429	0.208818
																						0.051245	0.0687	0.027778	0.108717		339.01	0.469214	0.496602	0.197537	0.207297	0.192993	0.131414	0.210486	0.212665
																						0.069181	0.060112	0.044687	0.11683		339.21	0.470858	0.4978	0.198844	0.20816	0.194005	0.130059	0.209636	0.20708
																						0.038434	0.088328	0.096621	0.026774		339.4	0.470206	0.498639	0.192989	0.209444	0.194851	0.135974	0.209599	0.208781
																						0.167828	0.209779	0.03261	0.066528		339.62	0.470093	0.495802	0.201697	0.209235	0.196262	0.137804	0.211278	0.208317
																						0.14733	0.123905	0.026571	0.034887		339.81	0.468659	0.496977	0.198127	0.209591	0.195211	0.130505	0.212245	0.209005
																						0.026904	0.025762	0.192034	0.102227		339.99	0.469792	0.497746	0.197124	0.207705	0.195273	0.136787	0.210635	0.20623
																						0.137081	0.03435	0.768135	0.034075		340.21	0.474959	0.498368	0.19816	0.204824	0.197123	0.135543	0.21088	0.207003
																						0.055089	0.029443	0.911859	0.036509		340.42	0.469674	0.500745	0.195117	0.205913	0.196153	0.132205	0.215785	0.209454
																						0.057651	0.278479	0.071258	0.05517		340.6	0.467455	0.502143	0.200361	0.205687	0.195949	0.1345	0.210034	0.211864
																						0.078149	0.269892	0.243968	0.093302		340.81	0.46833	0.499771	0.198755	0.20964	0.192262	0.134139	0.212955	0.208138
																						0.040996	0.153347	0.030194	0.053547		341.01	0.47272	0.502935	0.194363	0.209604	0.195739	0.136985	0.214573	0.211581
																						0.0679	0.050298	0.144931	0.202019		341.2	0.468013	0.501139	0.198117	0.213513	0.200125	0.135884	0.21207	0.210042
																						0.047402	0.185244	0.030194	0.033264		341.41	0.469544	0.499336	0.201974	0.207662	0.1915	0.133844	0.210954	0.211322
																						0.061494	0.077287	0.263292	0.02434		341.62	0.470619	0.497814	0.197354	0.20697	0.193319	0.136543	0.211553	0.212359
																						0.319002	0.028216	3.83464	0.690434		341.82	0.474238	0.498497	0.19937	0.208785	0.199226	0.132352	0.213741	0.21194
																						0.121707	0.17543	0.376821	0.054359		342.01	0.473585	0.501753	0.194991	0.20774	0.194203	0.13454	0.213361	0.215077
																						0.049964	0.288293	0.047103	0.105472		342.21	0.472634	0.498646	0.201113	0.208644	0.194607	0.135941	0.210501	0.211023
																						0.04484	0.133719	0.118361	0.042189		342.41	0.473442	0.497543	0.199018	0.209845	0.199373	0.135555	0.212067	0.211459
																						0.032028	0.128812	0.112322	0.060849		342.61	0.466454	0.500199	0.201058	0.208237	0.193566	0.136744	0.217803	0.208577
																						0.025623	0.024536	0.439625	0.098981		342.82	0.471052	0.500118	0.200068	0.208415	0.195333	0.133922	0.213563	0.210426
																						0.029466	0.375395	0.036233	0.845397		343.01	0.470468	0.498549	0.202064	0.208362	0.201637	0.137933	0.21413	0.208386
																						0.037153	0.060112	0.079712	0.06166		343.21	0.470819	0.496856	0.20149	0.204305	0.196623	0.135018	0.211895	0.209354
																						0.032028	0.028216	0.134061	0.389434		343.41	0.471855	0.49936	0.199106	0.208264	0.195964	0.137507	0.211712	0.208583
																						0.024341	0.039257	0.310394	0.054359		343.61	0.471057	0.500579	0.197665	0.210069	0.197325	0.134355	0.210019	0.210793
																						0.034591	0.488258	0.565232	0.062472		343.8	0.47016	0.500886	0.200764	0.207843	0.195652	0.133967	0.215454	0.205694
																						0.030747	0.133719	0.109906	0.049491		344.02	0.469564	0.497306	0.198148	0.207542	0.199209	0.138862	0.209617	0.209541
																						0.039715	0.069926	2.42156	0.025962		344.21	0.466659	0.502147	0.198607	0.210355	0.194873	0.136082	0.217483	0.208184
																						0.297222	0.044164	0.035025	0.038132		344.39	0.472492	0.500625	0.201563	0.209121	0.193927	0.137399	0.215826	0.213939
																						0.047402	0.045391	0.035025	0.207698		344.61	0.474262	0.499051	0.197976	0.208651	0.195118	0.136039	0.211577	0.208963
																						0.051245	0.025762	0.076089	0.343189		344.82	0.473784	0.498187	0.203085	0.212868	0.197687	0.135148	0.210059	0.212772
																						0.120426	0.214686	1.25969	1.03119		345	0.472098	0.499279	0.200534	0.211227	0.197741	0.136543	0.211202	0.211234
																						0.125551	0.272345	0.128023	0.090057		345.22	0.471605	0.504585	0.199778	0.209701	0.197396	0.131891	0.213895	0.211354
																						0.120426	0.065019	0.111114	0.030019		345.41	0.476121	0.497953	0.199368	0.213834	0.190876	0.13723	0.214288	0.211195
																						0.083273	0.125132	0.078504	0.032453		345.6	0.469449	0.504923	0.195612	0.212983	0.197464	0.139322	0.215963	0.213685
																						0.137081	0.418332	0.248799	0.07383		345.81	0.472592	0.501348	0.200933	0.20986	0.198842	0.131875	0.211395	0.210613
																						0.169109	0.314056	0.090582	0.125755		346.02	0.471203	0.501178	0.201948	0.209107	0.199176	0.133709	0.212366	0.207991
																						0.029466	0.085875	0.724656	0.027585		346.2	0.476527	0.50244	0.198383	0.207306	0.201677	0.134922	0.21566	0.20967
																						0.028185	0.07606	0.074881	0.058415		346.41	0.468759	0.499268	0.19932	0.208556	0.199935	0.13521	0.213874	0.211972
																						0.057651	0.07238	0.147347	0.071396		346.61	0.472903	0.502909	0.19723	0.210093	0.194695	0.138108	0.21833	0.209426
																						0.060213	0.203645	0.343004	0.086		346.8	0.474262	0.498588	0.197418	0.20931	0.193225	0.136511	0.214085	0.211053
																						0.024341	0.096916	0.394938	0.028396		347.01	0.468828	0.503397	0.203373	0.209686	0.197625	0.136892	0.217377	0.207285
																						0.083273	0.050298	0.061596	0.12251		347.22	0.472968	0.499717	0.19615	0.211483	0.196212	0.137551	0.208369	0.207962
																						0.349749	0.132492	1.0109	0.032453		347.4	0.47471	0.504561	0.2009	0.213173	0.196213	0.136843	0.212755	0.211745
																						0.049964	0.056432	1.12926	0.033264		347.61	0.472118	0.50229	0.197939	0.214216	0.197475	0.13432	0.213526	0.207021
																						0.149892	0.185244	0.064011	0.026774		347.81	0.476419	0.500906	0.201007	0.214908	0.196981	0.134013	0.2128	0.209306
																						0.078149	0.07238	0.044687	0.089245		348.01	0.470559	0.505497	0.200168	0.21211	0.197437	0.13787	0.213676	0.207402
																						0.243415	0.082194	0.181164	0.035698		348.22	0.470726	0.503737	0.201476	0.208798	0.199261	0.134954	0.213754	0.208834
																						0.324126	0.063793	1.45052	0.217434		348.42	0.470692	0.500811	0.200771	0.208642	0.196853	0.133136	0.214439	0.215236
																						0.069181	0.22082	0.057972	0.193095		348.61	0.472513	0.504204	0.198787	0.212803	0.196127	0.134753	0.211072	0.211505
																						0.035872	0.07606	0.074881	0.033264		348.81	0.475759	0.505116	0.198833	0.208392	0.196723	0.135446	0.214242	0.211146
																						0.071743	0.071153	0.077297	0.084377		349.01	0.473918	0.504109	0.200294	0.210583	0.19744	0.134007	0.208339	0.209509
																						0.051245	0.07606	0.054349	1.6194		349.21	0.469649	0.503343	0.19962	0.209492	0.200436	0.135139	0.21146	0.21214
																						0.324126	0.090782	0.076089	0.060038		349.42	0.472353	0.501364	0.20072	0.211881	0.197162	0.137286	0.212267	0.209802
																						0.326688	0.057659	0.089374	0.078698		349.62	0.470203	0.49997	0.19881	0.209167	0.200037	0.136068	0.21386	0.210837
																						0.392026	0.109183	0.216189	0.072208		349.81	0.471774	0.50238	0.198343	0.209927	0.20339	0.135504	0.212448	0.214524
																						0.210105	0.138626	0.246383	0.025962		350.01	0.472649	0.504857	0.200477	0.212345	0.19749	0.13395	0.21636	0.213979
																						0.114021	0.029443	0.176333	0.028396		350.21	0.469471	0.501964	0.202228	0.213656	0.198741	0.139239	0.212756	0.213341
																						0.033309	0.096916	0.025363	0.030019		350.41	0.470739	0.505136	0.198853	0.21049	0.200628	0.132187	0.214956	0.213855
																						0.032028	0.39257	0.064011	0.030019		350.6	0.472513	0.503581	0.201042	0.209962	0.19917	0.133744	0.216006	0.211205
																						0.032028	0.0687	0.276577	0.060849		350.8	0.475921	0.504645	0.200733	0.213792	0.194759	0.134888	0.210436	0.207891
																						0.053807	0.039257	0.051934	0.035698		351.01	0.472929	0.506482	0.204669	0.210672	0.197523	0.13683	0.21628	0.21378
																						0.069181	0.039257	0.18358	0.086		351.2	0.471998	0.503524	0.202306	0.209743	0.200741	0.13412	0.211279	0.214735
																						0.216511	0.024536	0.507259	0.053547		351.41	0.475227	0.502941	0.203303	0.21148	0.201059	0.137558	0.217248	0.212759
																						0.055089	0.120224	0.297109	0.025151		351.62	0.472077	0.505487	0.199333	0.212669	0.198437	0.13665	0.215653	0.212166
																						0.156298	0.073607	0.159424	0.19634		351.8	0.473619	0.504064	0.2022	0.211501	0.200127	0.134252	0.215232	0.212735
																						0.681562	0.026989	0.179956	0.053547		352.01	0.473572	0.503185	0.201264	0.209885	0.198616	0.138373	0.211339	0.211103
																						0.029466	0.063793	0.035025	0.036509		352.21	0.474324	0.501483	0.201031	0.211663	0.19638	0.133265	0.217247	0.214083
																						0.096085	0.030669	0.12923	0.452717		352.4	0.472749	0.502696	0.201019	0.208415	0.201317	0.135085	0.213878	0.213791
																						0.130675	0.138626	0.055557	0.126566		352.61	0.473694	0.506818	0.200245	0.212149	0.196402	0.134883	0.215511	0.214789
																						0.097366	0.21346	0.143723	0.047868		352.82	0.470969	0.509587	0.20228	0.209829	0.199837	0.135984	0.215417	0.209803
																						0.590601	0.025762	0.211358	0.039755		353.01	0.474972	0.503506	0.202856	0.21095	0.201434	0.136794	0.213033	0.210179
																						0.412524	0.133719	0.057972	0.027585		353.21	0.470986	0.502066	0.202081	0.214388	0.198245	0.137785	0.211332	0.213265
																						0.032028	0.026989	0.106283	0.068962		353.41	0.468945	0.503035	0.202426	0.210028	0.195343	0.137421	0.212415	0.210844
																						0.522701	0.088328	0.078504	0.060849		353.6	0.476773	0.502391	0.202526	0.214285	0.195297	0.134086	0.214256	0.210234
																						0.073024	0.099369	0.030194	0.094925		353.82	0.47435	0.507788	0.203555	0.217604	0.199621	0.139527	0.212609	0.212411
																						0.060213	0.03435	0.025363	0.029208		354.02	0.472819	0.500529	0.202763	0.208877	0.19772	0.13645	0.217188	0.212095
																						0.114021	0.060112	0.028986	0.100604		354.21	0.468217	0.506337	0.203135	0.209672	0.201531	0.135435	0.220848	0.21371
																						0.073024	0.137399	0.036233	0.087623		354.41	0.475849	0.502212	0.202609	0.211854	0.198889	0.139709	0.215529	0.213121
																						0.245977	0.455135	0.038648	0.050302		354.61	0.474334	0.503747	0.198111	0.209589	0.199368	0.134953	0.212648	0.21293
																						0.07943	0.071153	0.042272	0.032453		354.81	0.473227	0.505672	0.203823	0.21267	0.202444	0.136631	0.213359	0.211978
																						0.160141	0.035577	0.026571	0.065717		355.02	0.474399	0.505601	0.201058	0.211312	0.198907	0.142837	0.215057	0.213262
																						0.46505	0.224501	0.079712	0.047868		355.22	0.473739	0.502801	0.199956	0.206809	0.198151	0.136136	0.216547	0.210128
																						0.033309	0.040484	0.080437	0.047057		355.41	0.47381	0.504637	0.200661	0.212797	0.202708	0.135438	0.216144	0.208911
																						0.330532	0.093235	0.059583	0.043811		355.61	0.475116	0.504582	0.202749	0.208896	0.199302	0.136038	0.216703	0.212467
																						0.030747	0.428146	0.084906	0.036509		355.81	0.476917	0.504788	0.199639	0.207848	0.198372	0.134343	0.212836	0.215309
																						0.055089	0.191378	0.126614	0.042189		356.02	0.473217	0.506155	0.202049	0.210135	0.200957	0.134379	0.217348	0.212538
																						0.037153	0.089555	0.227906	0.043811		356.2	0.473577	0.506955	0.204699	0.210201	0.196236	0.133962	0.213451	0.208746
																						0.427898	0.026989	0.080437	0.05517		356.42	0.474205	0.501441	0.200692	0.211087	0.198574	0.138337	0.217151	0.212418
																						0.084555	0.058885	0.041708	0.045434		356.61	0.474315	0.503062	0.200185	0.211377	0.197337	0.133209	0.215696	0.210301
																						0.05637	0.051525	0.044687	0.076264		356.81	0.47222	0.50449	0.201586	0.209816	0.200347	0.133371	0.216229	0.214028
																						0.034591	0.025762	0.037239	0.071396		357.01	0.474578	0.505023	0.202099	0.211577	0.199458	0.135293	0.217134	0.210806
																						0.098647	0.026989	0.117677	0.030019		357.22	0.471583	0.506674	0.199244	0.210337	0.198536	0.136818	0.214778	0.214181
																						0.14733	0.060112	0.148958	0.029208		357.4	0.473016	0.506071	0.204521	0.209097	0.203568	0.135437	0.216261	0.212023
																						0.457364	0.044164	0.406655	0.03083		357.61	0.477068	0.50848	0.203429	0.210877	0.203286	0.138224	0.217372	0.215122
																						0.162704	0.125132	0.855018	0.030019		357.81	0.473203	0.504793	0.201957	0.209497	0.196822	0.135027	0.213988	0.211059
																						0.156298	0.031896	0.125125	0.06734		358	0.475765	0.506343	0.201197	0.209708	0.198084	0.137797	0.214099	0.211168
																						0.477862	0.065019	0.153427	0.040566		358.21	0.473785	0.507837	0.200595	0.211205	0.198359	0.137359	0.214591	0.212137
																						0.071743	0.166842	0.038729	0.171189		358.42	0.470975	0.505202	0.20417	0.214393	0.198673	0.136559	0.213253	0.211918
																						0.224198	0.099369	0.025323	0.051925		358.6	0.477183	0.505438	0.201858	0.212979	0.202722	0.136902	0.21229	0.212436
																						0.667469	0.061339	0.081927	0.081132		358.81	0.473675	0.507929	0.204622	0.208816	0.202208	0.136199	0.217202	0.21309
																						0.276724	0.057659	0.038729	0.027585		359.01	0.476064	0.504465	0.203998	0.212906	0.200909	0.134807	0.216605	0.216595
																						0.316439	0.031896	0.031281	0.077076		359.2	0.475736	0.507302	0.207361	0.21354	0.20103	0.13615	0.215018	0.210599
																						0.108896	0.121451	0.166833	0.029208		359.42	0.47332	0.509627	0.2036	0.213856	0.201679	0.137625	0.214975	0.213903
																						0.037153	0.062566	0.126614	0.046245		359.62	0.471437	0.507737	0.202289	0.208993	0.198594	0.137439	0.214344	0.214126
																						0.035872	0.604802	1.10229	0.369963		359.81	0.492925	0.506963	0.202204	0.211973	0.198822	0.136748	0.214768	0.212885
																						0.312596	0.101823	0.059583	0.147661		360.01	0.502236	0.506998	0.202429	0.21269	0.197107	0.140581	0.215138	0.212173
																						0.047402	0.104276	0.123635	0.06734		360.21	0.503256	0.505861	0.200649	0.215113	0.201998	0.135175	0.214947	0.212703
																						0.037153	0.098142	0.026812	0.036509		360.4	0.503537	0.507619	0.198875	0.212212	0.198575	0.133869	0.215994	0.214111
																						0.030747	0.067473	0.210031	0.025151		360.62	0.50073	0.505865	0.206691	0.212725	0.198889	0.137246	0.215131	0.217341
																						0.284411	0.07606	0.053625	0.035698		360.82	0.501272	0.508019	0.203591	0.209543	0.203251	0.139335	0.21651	0.212275
																						0.208824	0.116544	0.03575	0.049491		361.01	0.504277	0.506637	0.204787	0.212345	0.199789	0.138364	0.220218	0.213541
																						0.040996	0.041711	1.02632	0.265302		361.21	0.503779	0.506624	0.200645	0.212839	0.201624	0.141236	0.216489	0.212886
																						0.033309	0.03803	2.00348	0.077887		361.41	0.49935	0.509826	0.200134	0.209313	0.197104	0.137727	0.212782	0.213521
																						0.23829	0.042937	0.241312	0.258		361.62	0.503435	0.511163	0.202185	0.211396	0.201089	0.137769	0.218012	0.211088
																						0.049964	0.229408	0.14151	0.085189		361.82	0.502834	0.506722	0.20563	0.212242	0.203459	0.136657	0.214964	0.215094
																						0.033309	0.067473	0.773091	0.040566		362.01	0.503676	0.505904	0.201398	0.216224	0.20072	0.137172	0.215258	0.217048
																						0.463769	0.03803	0.287489	0.038943		362.21	0.502288	0.509877	0.202939	0.214848	0.200527	0.138335	0.219994	0.213718
																						0.138362	0.14844	0.214499	0.142793		362.41	0.502972	0.508513	0.201872	0.214123	0.202545	0.137263	0.214494	0.213095
																						0.029466	0.040484	2.84807	0.026774		362.61	0.50237	0.507452	0.202994	0.210358	0.198437	0.137976	0.217611	0.213123
																						0.174234	0.082194	0.244291	0.069774		362.82	0.501863	0.509718	0.204947	0.214377	0.197821	0.137776	0.21814	0.215288
																						0.108896	0.164389	0.165343	0.050302		363	0.502191	0.509594	0.203563	0.214497	0.201686	0.140775	0.217206	0.213441
																						0.046121	0.065019	0.025323	0.031642		363.21	0.501077	0.506589	0.209166	0.212061	0.201129	0.136963	0.216453	0.216199
																						0.026904	0.03435	0.081927	0.029208		363.41	0.500521	0.506349	0.201547	0.211592	0.196978	0.138151	0.214791	0.212076
																						0.103772	0.154574	0.644987	0.036509		363.61	0.502191	0.505551	0.20409	0.212538	0.200169	0.137363	0.217027	0.21488
																						0.178077	0.057659	0.125125	0.248264		363.82	0.50568	0.508333	0.20159	0.215772	0.200916	0.140035	0.216713	0.220611
																						0.081992	0.046618	0.786497	0.100604		364.02	0.506855	0.508596	0.205168	0.213282	0.195253	0.136644	0.218835	0.2125
																						0.033309	0.024536	1.09186	0.091679		364.21	0.504415	0.504748	0.204041	0.213698	0.200458	0.141281	0.215408	0.216309
																						0.032028	0.058885	0.058094	0.043		364.41	0.507141	0.511276	0.206221	0.216456	0.203729	0.13682	0.214183	0.211736
																						0.061494	0.031896	0.031281	0.026774		364.61	0.504234	0.510707	0.207807	0.213017	0.201808	0.138265	0.219317	0.213188
																						0.276724	0.029443	0.028302	0.02434		364.8	0.504459	0.505238	0.201617	0.214724	0.205319	0.138582	0.217191	0.213365
																						0.030747	0.036803	0.108739	0.025962		365.02	0.504184	0.508263	0.205526	0.213192	0.198766	0.138366	0.218911	0.213603
																						0.46505	0.203645	0.03575	0.053547		365.22	0.501104	0.511576	0.203547	0.215257	0.203297	0.140807	0.21488	0.215904
																						0.133238	0.030669	0.17726	0.043		365.41	0.505349	0.507285	0.204926	0.215189	0.198705	0.138982	0.216202	0.214625
																						0.165266	0.168069	0.221947	0.043811		365.61	0.499753	0.506984	0.202942	0.216294	0.203656	0.137108	0.216152	0.212486
																						0.073024	0.046618	0.265145	0.07383		365.81	0.504721	0.50786	0.202725	0.214281	0.202929	0.138618	0.214934	0.216094
																						0.15886	0.051525	0.363457	0.065717		366	0.502146	0.509997	0.202321	0.213596	0.202417	0.138658	0.216809	0.209274
																						0.603413	0.122678	0.604769	0.030019		366.22	0.504425	0.507786	0.206513	0.214724	0.198945	0.138621	0.21992	0.212823
																						0.249821	0.03435	0.382822	0.044623		366.4	0.506898	0.504253	0.202859	0.215606	0.2026	0.135313	0.217701	0.214273
																						0.324126	0.267438	0.631581	0.041377		366.59	0.501999	0.509053	0.205395	0.212559	0.201374	0.141547	0.219828	0.215375
																						0.155017	0.033123	0.583915	0.055433		366.81	0.503799	0.509671	0.202301	0.212199	0.199701	0.138857	0.219815	0.215704
																						0.028185	0.089555	0.038729	0.202616		367.01	0.50441	0.509371	0.20548	0.21163	0.202365	0.133676	0.220122	0.216721
																						0.040996	0.107957	0.032771	0.038229		367.2	0.505125	0.51123	0.200453	0.209389	0.202643	0.137496	0.215891	0.214695
																						0.052526	0.056432	0.455811	0.034407		367.42	0.50709	0.508543	0.205114	0.215789	0.202741	0.135892	0.216693	0.215397
																						0.101209	0.042937	0.095333	0.049698		367.61	0.50171	0.50744	0.206012	0.212514	0.201624	0.136185	0.214302	0.218296
																						0.032028	0.136173	0.043198	0.032495		367.81	0.505138	0.506025	0.206487	0.215468	0.201158	0.1355	0.215917	0.215182
																						0.038434	0.033123	0.075968	0.024849		368.01	0.504585	0.511203	0.20906	0.213918	0.202462	0.139673	0.221142	0.213289
																						0.025623	0.03435	0.031281	0.042052		368.21	0.503341	0.509122	0.202785	0.214107	0.200687	0.135276	0.218205	0.215512
																						0.181921	0.123905	1.23188	0.043964		368.42	0.507078	0.507117	0.203883	0.212318	0.201826	0.138569	0.220274	0.215313
																						0.176796	0.10673	0.128104	0.070725		368.62	0.502832	0.509381	0.20671	0.215864	0.199094	0.137915	0.220601	0.215411
																						0.042277	0.047844	0.262166	0.070725		368.81	0.510139	0.511954	0.202994	0.214639	0.202391	0.139906	0.216442	0.21749
																						0.155017	0.063793	0.0715	0.030584		369.01	0.503993	0.507891	0.204739	0.215821	0.201105	0.143051	0.21914	0.217095
																						0.157579	0.07606	0.802883	0.042052		369.21	0.503995	0.510452	0.20558	0.21361	0.204125	0.13454	0.215928	0.218855
																						0.04484	0.132492	0.065541	0.043964		369.42	0.506932	0.513168	0.205545	0.211571	0.20352	0.137505	0.219795	0.216005
																						0.79302	0.065019	0.050646	0.032495		369.62	0.509154	0.512042	0.204636	0.214715	0.200789	0.135085	0.217432	0.217558
																						0.057651	0.045391	0.03426	0.070725		369.81	0.503696	0.510046	0.205881	0.214139	0.201153	0.140488	0.220439	0.21783
																						0.142206	0.078514	0.03426	0.028672		370.01	0.507097	0.513308	0.203478	0.214609	0.202675	0.138418	0.21633	0.216712
																						0.034591	0.060112	0.03426	0.026761		370.21	0.508342	0.510655	0.210528	0.212608	0.203338	0.137087	0.217805	0.217681
																						0.097366	0.094462		0.036318		370.41	0.504814	0.514038	0.204914	0.213581	0.203118	0.140069	0.217228	0.215841
																						0.051245	0.049071		0.063079		370.62	0.507683	0.510099	0.207816	0.212879	0.20161	0.138203	0.217099	0.215995
																						0.030747	0.051525		0.032495		370.82	0.507787	0.511336	0.205632	0.215238	0.201096	0.140129	0.216538	0.214646
																						0.081992	0.036803		0.053521		370.99	0.505697	0.512471	0.202231	0.214548	0.201393	0.137904	0.213868	0.210125
																						0.495798	0.158255		0.118511		371.21	0.504868	0.510467	0.204214	0.21563	0.200956	0.138927	0.216368	0.216411
																						0.080711	0.03435		0.074547		371.41	0.506402	0.506357	0.206564	0.211928	0.20128	0.13706	0.217987	0.215831
																						0.098647	0.039257		0.036318		371.6	0.507303	0.511334	0.207171	0.21479	0.202808	0.139229	0.214173	0.217721
																						0.56626	0.074834		0.024849		371.82	0.506838	0.515332	0.201257	0.216092	0.202104	0.14369	0.217379	0.213867
																						0.133238	0.066246		0.040141		372.01	0.507146	0.511323	0.205261	0.214487	0.206966	0.140637	0.222242	0.214457
																						0.07943	0.10673		0.072636		372.19	0.506229	0.513143	0.207234	0.216763	0.201619	0.136252	0.218899	0.215622
																						0.026904	0.053978		0.043964		372.41	0.507337	0.509036	0.203761	0.211682	0.201654	0.134708	0.216151	0.214063
																						0.035872	0.090782		0.10322		372.61	0.504494	0.512662	0.207704	0.215395	0.200669	0.139661	0.217532	0.21228
																						0.042277	0.030669		0.059256		372.8	0.505427	0.509872	0.208002	0.212926	0.201747	0.134724	0.216466	0.21562
																						0.310034	0.079741		0.105131		373.02	0.507941	0.509294	0.204369	0.214304	0.201977	0.140897	0.215682	0.220451
																						0.075587	0.201192		0.061167		373.21	0.507756	0.513005	0.204929	0.214597	0.20416	0.136209	0.219224	0.21357
																						0.126832	0.031896		0.047787		373.39	0.509835	0.514186	0.20787	0.213564	0.202216	0.140077	0.218805	0.214352
																						0.088398	0.100596		0.028672		373.61	0.502326	0.50927	0.207314	0.216127	0.201363	0.138032	0.219045	0.217678
																						0.088398	0.136173		0.034407		373.82	0.509356	0.509733	0.206256	0.215228	0.201794	0.139806	0.220639	0.215917
																						0.028185	0.085875		0.036318		374	0.502916	0.509649	0.204063	0.217337	0.201947	0.135787	0.217633	0.21622
																						0.088398	0.160708		0.040141		374.22	0.504025	0.51146	0.208159	0.217661	0.203086	0.139314	0.219175	0.216521
																						0.193451	0.092008		0.026761		374.41	0.50615	0.513072	0.206282	0.217071	0.202558	0.141401	0.216427	0.21525
																						0.028185	0.051525		0.21982		374.61	0.507493	0.513437	0.206429	0.213017	0.204402	0.13646	0.218823	0.21522
																						0.254945	0.049071		0.061167		374.81	0.502106	0.511148	0.208237	0.218715	0.206264	0.138668	0.219577	0.219283
																						0.366403	0.045391		0.063079		375.02	0.505704	0.51245	0.207095	0.216928	0.205564	0.139211	0.218903	0.213501
																						0.076868	0.177883		0.080282		375.22	0.508831	0.514031	0.204825	0.214238	0.206374	0.138103	0.217642	0.216133
																						0.281849	0.187697		0.068813		375.41	0.502965	0.512975	0.20727	0.216946	0.20591	0.139394	0.220097	0.218745
																						0.042277	0.03435		0.028672		375.61	0.506943	0.513661	0.207129	0.215758	0.205567	0.137697	0.217941	0.217138
																						0.573947	0.029443		0.026761		375.81	0.504916	0.514506	0.202734	0.212378	0.206465	0.138378	0.220018	0.216694
																						0.029466	0.025762		0.066902		376.01	0.50635	0.509089	0.20611	0.213333	0.205449	0.139209	0.218877	0.213944
																						0.114021	0.047844		0.10322		376.22	0.509305	0.51107	0.204678	0.216489	0.203324	0.140962	0.218922	0.214498
																						0.188326	0.126863		0.06499		376.4	0.506981	0.512124	0.21199	0.212945	0.204468	0.141464	0.220925	0.214127
																						0.160141	0.085236		0.036318		376.61	0.505629	0.514229	0.205765	0.217677	0.20593	0.143535	0.219285	0.216779
																						0.146049	0.085236		0.034407		376.81	0.505234	0.511544	0.208367	0.217536	0.204259	0.139173	0.219093	0.219693
																						0.130675	0.039645		0.06499		377.01	0.50301	0.517799	0.206367	0.212901	0.202438	0.135521	0.217704	0.217537
																						0.039715	0.034689		0.024849		377.2	0.507206	0.518424	0.211082	0.218037	0.204009	0.137593	0.215555	0.218224
																						0.11274	0.025769		0.049698		377.42	0.508796	0.512349	0.206485	0.216372	0.205466	0.139751	0.217392	0.217775
																						0.196013	0.040636		0.066902		377.61	0.508675	0.509023	0.204827	0.216847	0.20499	0.139399	0.222108	0.213914
																						0.161423	0.111996		0.045875		377.79	0.507	0.513054	0.206126	0.214077	0.203008	0.139026	0.223727	0.219292
																						0.046121	0.039645		0.101308		378.01	0.508105	0.512703	0.206027	0.218813	0.202703	0.14155	0.219407	0.215222
																						0.048683	0.02676		0.063079		378.21	0.510693	0.51029	0.206032	0.216005	0.203735	0.139815	0.221289	0.215069
																						0.04484	0.034689		0.24658		378.4	0.508469	0.507884	0.208059	0.216277	0.207063	0.136185	0.222015	0.215243
																						0.037153	0.268592		0.179679		378.62	0.505141	0.515696	0.207558	0.215254	0.202885	0.140667	0.217231	0.218289
																						0.033309	0.130827		0.038229		378.81	0.509121	0.514664	0.209541	0.218175	0.205468	0.140573	0.219448	0.217949
																						0.367685	0.03568		0.034407		378.99	0.507596	0.516027	0.207695	0.220551	0.201119	0.139595	0.21978	0.214745
																						0.354873	0.05352		0.086016		379.21	0.504859	0.512664	0.207301	0.213314	0.201978	0.140116	0.218871	0.220299
																						0.025623	0.03568		0.275252		379.41	0.505397	0.517155	0.20561	0.217287	0.20953	0.13587	0.224372	0.214764
																						0.128113	0.02676		0.345977		379.6	0.507511	0.511768	0.205721	0.217405	0.205938	0.140971	0.224728	0.213369
																						0.111458	0.039645		0.137626		379.82	0.507295	0.513914	0.202993	0.215964	0.204018	0.13725	0.222961	0.216758
																						0.149892	0.033698		0.040141		380.01	0.506529	0.517633	0.2083	0.21492	0.204693	0.140203	0.221658	0.21447
																						0.208824	0.046582		0.072636		380.21	0.510943	0.516626	0.204121	0.216416	0.207829	0.139875	0.21598	0.216516
																						0.11274	0.050547		0.147184		380.41	0.507032	0.514245	0.21055	0.215561	0.20429	0.142282	0.219535	0.215145
																						0.249821	0.048565		0.472134		380.62	0.508456	0.51604	0.209855	0.21942	0.205384	0.140897	0.222117	0.21529
																						0.085836	0.403384		0.231288		380.82	0.511849	0.517318	0.208235	0.217652	0.20676	0.137438	0.220573	0.216031
																						0.342062	0.034689		0.063079		381.01	0.510507	0.514134	0.209282	0.214718	0.205491	0.138825	0.218924	0.219707
																						0.048683	0.030725		0.030584		381.21	0.509633	0.513063	0.209305	0.217821	0.208206	0.142653	0.219613	0.217191
																						0.485549	0.02676		0.045875		381.41	0.505286	0.517332	0.206116	0.213724	0.208395	0.135266	0.218796	0.218624
																						0.025623	0.048565		0.042052		381.61	0.508183	0.513717	0.209845	0.217039	0.203713	0.140159	0.219039	0.218917
																						0.102491	0.207143		0.034407		381.82	0.507419	0.515062	0.20673	0.216852	0.205083	0.142771	0.219102	0.220691
																						0.149892	0.074334		0.042052		382.01	0.509933	0.517356	0.207825	0.21648	0.204775	0.143186	0.220666	0.21769
																						0.058932	0.02676		0.063079		382.21	0.507321	0.520172	0.206815	0.215447	0.203336	0.142291	0.2195	0.221357
																						0.029466	0.028742		0.256138		382.41	0.506111	0.516709	0.207212	0.216803	0.20319	0.141032	0.219969	0.216382
																						0.038434	0.055502		0.059256		382.61	0.505239	0.515318	0.211077	0.215043	0.207905	0.138835	0.217002	0.217814
																						0.187045	0.099112		0.074547		382.82	0.508381	0.516624	0.20699	0.213195	0.199819	0.137641	0.220405	0.218166
																						0.126832	0.03568		0.05161		383.02	0.509707	0.517211	0.208888	0.221949	0.205822	0.140851	0.216091	0.218071
																						0.040996	0.054511		1.09145		383.21	0.510326	0.511572	0.206117	0.217111	0.204573	0.141823	0.219408	0.216459
																						0.058932	0.067396		0.055433		383.41	0.507507	0.514651	0.207751	0.21785	0.20475	0.140673	0.220102	0.218359
																						0.142206	0.048565		0.024849		383.61	0.50982	0.515678	0.208307	0.219615	0.206231	0.139439	0.221408	0.216286
																						0.032028	0.157587		0.135715		383.81	0.50693	0.515016	0.208871	0.217643	0.203082	0.138804	0.217831	0.218758
																						0.070462	0.049556		0.028672		384	0.502493	0.516414	0.206324	0.218244	0.201844	0.140836	0.223918	0.216831
																						0.275443	0.043609		0.724449		384.22	0.511162	0.512631	0.210965	0.219118	0.207166	0.140802	0.216463	0.211995
																						0.365122	0.231921		0.135715		384.41	0.507744	0.513598	0.20413	0.216029	0.204406	0.141191	0.222661	0.215313
																						0.11274	0.033698		0.256138		384.59	0.506635	0.513953	0.208574	0.215841	0.206618	0.140136	0.220423	0.217936
																						0.057651	0.118934		0.070725		384.81	0.507504	0.514502	0.210133	0.218626	0.205422	0.140496	0.222736	0.219027
																						0.033309	0.083254		0.057344		385.02	0.506518	0.514537	0.208065	0.216253	0.204551	0.142183	0.220253	0.22223
																						0.029466	0.158579		0.028672		385.2	0.505354	0.515746	0.209697	0.221219	0.202801	0.140079	0.221234	0.21906
																						0.0679	0.054511		0.076459		385.41	0.508477	0.515549	0.209499	0.216789	0.203932	0.143569	0.21852	0.215862
																						0.040996	0.025769		0.024849		385.61	0.512954	0.518254	0.209519	0.213942	0.206126	0.139277	0.220661	0.218267
																						0.071743	0.171463		0.147184		385.8	0.513076	0.518434	0.207417	0.218388	0.205223	0.139105	0.22215	0.217649
																						0.097366	0.029733		0.038229		386.01	0.51031	0.513367	0.207305	0.217931	0.204292	0.13932	0.223161	0.217516
																						0.047402	0.02676		0.036318		386.22	0.510493	0.517706	0.210038	0.220635	0.210364	0.138868	0.222863	0.220246
																						0.060213	0.070369		0.072636		386.42	0.507413	0.517868	0.208145	0.214902	0.209584	0.13891	0.219206	0.217053
																						0.033309	0.45294		0.028672		386.61	0.509384	0.516557	0.207901	0.217843	0.203545	0.138312	0.222101	0.219351
																						0.087117	0.06244		0.038229		386.81	0.509825	0.513226	0.211738	0.218712	0.205332	0.141224	0.221106	0.217245
																						0.053807	0.029733		0.057344		387	0.507316	0.519322	0.209785	0.221388	0.20586	0.142335	0.217883	0.22157
																						0.032028	0.082263		0.049698		387.22	0.506807	0.514911	0.209189	0.21407	0.206455	0.141057	0.219832	0.221725
																						0.038434	0.03568		0.082193		387.42	0.508864	0.519932	0.210766	0.217011	0.208896	0.142155	0.219098	0.220643
																						0.174234	0.100103		0.084105		387.6	0.512209	0.519872	0.207998	0.218776	0.202536	0.138249	0.223355	0.218751
																						0.075587	0.027751		0.670927		387.81	0.507871	0.515248	0.212012	0.219816	0.201897	0.136712	0.222213	0.218291
																						0.073024	0.211108		0.034407		388.01	0.50884	0.515713	0.205616	0.217907	0.204779	0.142262	0.219945	0.222206
																						0.099928	0.037662		0.300101		388.21	0.510195	0.517163	0.209549	0.218256	0.205445	0.139828	0.221378	0.219087
																						0.064057	0.127854		0.082193		388.42	0.510708	0.515701	0.20721	0.217631	0.203971	0.138835	0.222435	0.217603
																						0.051245	0.038654		0.185413		388.62	0.508791	0.515827	0.207216	0.220732	0.202224	0.141837	0.222229	0.216186
																						0.040896	0.281477		0.55815		388.81	0.510514	0.517599	0.208829	0.222149	0.206431	0.142889	0.225152	0.221986
																						0.024753	0.040636		0.359357		389.01	0.51064	0.517904	0.212592	0.218175	0.203037	0.141709	0.221876	0.218668
																						0.06242	0.05352		0.338331		389.21	0.507574	0.514594	0.209181	0.21795	0.205107	0.13911	0.220079	0.218524
																						0.125916	0.112987		0.024849		389.41	0.509887	0.516596	0.209546	0.220024	0.208225	0.142426	0.221746	0.218204
																						0.12484	0.028742		0.118511		389.62	0.50885	0.515284	0.210467	0.219607	0.204955	0.142107	0.220079	0.221481
																						0.130221	0.105058		0.135715		389.8	0.510849	0.517625	0.210194	0.218374	0.208794	0.139948	0.224348	0.217362
																						0.036591	0.034689		0.344065		390.01	0.508716	0.514165	0.211197	0.219101	0.207123	0.140088	0.220832	0.222432
																						0.10224	0.03568		0.099397		390.21	0.509053	0.51918	0.208049	0.218564	0.204518	0.137691	0.226086	0.217679
																						0.09363	0.029733		0.294367		390.41	0.508407	0.514977	0.207102	0.218972	0.203045	0.13998	0.219925	0.216857
																						0.087173	0.122898		0.235111		390.62	0.511986	0.514163	0.210732	0.220546	0.201859	0.141152	0.223521	0.218262
																						0.144212	0.102085		0.030584		390.8	0.508344	0.518643	0.210061	0.220371	0.208112	0.139976	0.218294	0.215832
																						0.063496	0.145694		0.114688		391.01	0.529166	0.517245	0.206551	0.219069	0.206993	0.138419	0.225664	0.2184
																						0.050582	0.032707		0.040141		391.21	0.536156	0.516459	0.209004	0.220204	0.205769	0.139011	0.221092	0.220629
																						0.087173	0.154614		0.31157		391.4	0.540642	0.51918	0.205491	0.217806	0.208166	0.143314	0.22264	0.218365
																						0.030134	0.223992		0.101308		391.61	0.536491	0.51547	0.211075	0.219135	0.202192	0.141879	0.222065	0.220376
																						0.043048	0.072351		0.043964		391.82	0.537917	0.517605	0.211792	0.222561	0.20607	0.143904	0.221566	0.220083
																						0.049505	0.116952		0.038229		392	0.539956	0.51928	0.209122	0.218771	0.202791	0.142241	0.222369	0.217165
																						0.026905	0.139747		0.097485		392.21	0.538157	0.514785	0.21181	0.218524	0.204248	0.141213	0.220921	0.219897
																						0.025829	0.153623		0.135715		392.41	0.541246	0.519479	0.206354	0.220711	0.204136	0.137831	0.223779	0.21836
																						0.208784	0.028742		0.256138		392.6	0.543396	0.523301	0.212773	0.216579	0.205547	0.139794	0.222314	0.220969
																						0.142059	0.182365		0.422436		392.82	0.539133	0.518974	0.207112	0.221137	0.202884	0.139154	0.226649	0.21744
																						0.109773	0.031716		0.12998		393	0.544478	0.519734	0.209599	0.217954	0.203363	0.140368	0.222587	0.221907
																						0.060268	0.051538		0.063079		393.21	0.541996	0.522487	0.211831	0.218026	0.209308	0.140495	0.222977	0.221311
																						0.034439	0.192276		0.600203		393.41	0.542329	0.5205	0.212147	0.220798	0.205395	0.141643	0.223596	0.221899
																						0.091478	0.19525		0.063079		393.61	0.541594	0.516584	0.211253	0.21979	0.207822	0.137688	0.222588	0.221224
																						0.038743	0.273548		0.038229		393.81	0.545003	0.518767	0.207716	0.221353	0.210182	0.138026	0.221665	0.219503
																						0.095782	0.110014		0.028672		394.02	0.541525	0.517991	0.209488	0.217463	0.205406	0.142008	0.222106	0.21752
																						0.055963	0.057485		0.038229		394.2	0.540325	0.517181	0.209753	0.219974	0.208507	0.141029	0.221513	0.224398
																						0.201251	0.13281		0.133803		394.41	0.544684	0.524221	0.209705	0.219322	0.206772	0.139123	0.223338	0.218941
																						0.045201	0.556016		0.053521		394.61	0.541121	0.518245	0.208699	0.217303	0.206197	0.142358	0.224679	0.217834
																						0.046277	0.205161		0.045875		394.81	0.544136	0.52246	0.207678	0.217154	0.208299	0.138932	0.222891	0.222878
																						0.083944	0.036671		0.05161		395.02	0.54259	0.519559	0.2125	0.217489	0.207225	0.138228	0.221503	0.22029
																						0.12484	0.03568		0.030584		395.22	0.54245	0.518996	0.208203	0.220252	0.205999	0.137827	0.225731	0.22018
																						0.565008	0.031716		0.042052		395.4	0.544156	0.518975	0.210747	0.217357	0.208176	0.142853	0.224896	0.22079
																						0.255061	0.084245		0.024849		395.61	0.543518	0.518212	0.209175	0.219112	0.209524	0.139708	0.219401	0.21995
																						0.035515	0.061449		0.437728		395.81	0.546402	0.519255	0.212449	0.219937	0.205816	0.144961	0.222988	0.21851
																						0.256137	0.100103		0.126157		396.01	0.544403	0.519808	0.209564	0.216954	0.207695	0.140815	0.223963	0.223363
																						0.126992	0.229939		0.514187		396.22	0.543371	0.521735	0.206748	0.223527	0.210423	0.139488	0.222362	0.219127
																						0.160355	0.052529		0.475957		396.42	0.542617	0.516019	0.208431	0.216658	0.203415	0.13874	0.219027	0.221941
																						0.117307	0.162543		0.097485		396.61	0.543322	0.519265	0.211837	0.217649	0.205832	0.141686	0.223625	0.218757
																						0.026905	0.038654		0.045875		396.81	0.548652	0.519598	0.204599	0.219346	0.205325	0.139699	0.21773	0.219128
																						0.160355	0.029733		0.030584		397	0.547149	0.517412	0.206748	0.218528	0.209541	0.139866	0.223142	0.219741
																						0.117307	0.039645		0.099397		397.22	0.545529	0.520247	0.211635	0.214653	0.208637	0.143221	0.224066	0.223598
																						0.059191	0.245797		0.227465		397.42	0.549428	0.520376	0.208758	0.219086	0.207598	0.142872	0.22204	0.221313
																						0.029058	0.335988		0.384206		397.6	0.547252	0.521917	0.212413	0.21853	0.205457	0.139426	0.22629	0.221949
																						0.064572	0.192276		0.043964		397.81	0.545409	0.519022	0.212216	0.219078	0.206666	0.13827	0.221976	0.223049
																						0.162507	0.376624		0.183502		398.01	0.544659	0.519382	0.210477	0.218364	0.208036	0.137656	0.223114	0.222534
																						0.049505	0.032707		0.028672		398.2	0.546125	0.51909	0.211924	0.218429	0.207003	0.140574	0.222123	0.222364
																						0.072106	0.254717		0.300101		398.42	0.547262	0.522498	0.210732	0.221038	0.207993	0.144127	0.224073	0.220259
																						0.03982	0.339953		0.045875		398.62	0.546141	0.518107	0.209972	0.22395	0.208515	0.144862	0.224378	0.223847
																						0.236765	0.327068		0.045875		398.81	0.545804	0.518947	0.210732	0.220521	0.20475	0.143128	0.222314	0.220857
[truncated: 9,705 more rows]
