# Supplementary material for: Capping protein regulates endosomal trafficking by controlling F-actin density around endocytic vesicles and recruiting RAB5 effectors
Source: eLife. 2021 Nov 19;10:e65910. doi: 10.7554/eLife.65910 (PMC8654373; doi:10.7554/eLife.65910)
Supplement: Figure 6—figure supplement 1—source data 2. [file elife-65910-fig6-figsupp1-data2.xlsx]

## Sheet: Sheet1
WT	CapZb KO	CapZb KO+ CapZbD34
10.2	16.334	22.828
5.67	16.05	21.87
10.42	22.207	27.462
10.17	22.9	30.255
6.06	28.357	38.955
9	22.748	28.947
5.76	24.247	19.988
8.927	25.253	27.741
9.545	22.183	28.699
10.467	20.535	23.849
13.462	22.087	19.532
9.818	20.321	26.883
12.935	21.661	38.49
12.772	24.902	43.23
4.889	24.346	34.96
8.68	19.586	48.87
13.329	17.988	37.708
8.06	17.41	37.265
11.644	23.952	47.933
8.589	27.358	44
6.564	18.974	26.952
6.961	24.455	38.11
8.04
