# Supplementary material for: Capping protein regulates endosomal trafficking by controlling F-actin density around endocytic vesicles and recruiting RAB5 effectors
Source: eLife. 2021 Nov 19;10:e65910. doi: 10.7554/eLife.65910 (PMC8654373; doi:10.7554/eLife.65910)
Supplement: Figure 6—source data 2. [file elife-65910-fig6-data2.xlsx]

## Sheet: Sheet1
Figure 6C	Number				Size					Figure 6D											Figure 6E
WT	CapZb KO	CapZb KO+ CapZbD34			WT	CapZb KO	CapZb KO+ CapZbD34			WT			CapZb KO			CapZb KO+ CapZbD34					RFP-RAB5A/GFP-CapZb	RFP-RAB5A/GFP-CapZbD34
233	546	423			0.079283	0.123633	0.075322			0	45	90	0	45	90	0	45	90			0.17	0.075
163	438	361			0.213796	0.192169	0.054779			17.201	7.293	4.87	7.024	12.37	7.745	14.474	12.062	11.468			0.448	0.148
152	446	352			0.0873	0.073911	0.047932			16.738	6.911	5.269	7.931	12.229	7.898	16.539	11.103	9.562			0.453	0.151
174	457	386			0.053449	0.057785	0.109559			18.23	8.146	4.784	12.995	15.519	12.043	16.135	9.833	10.863			0.402	0.42
123	416	415			0.071265	0.049722	0.044508			18.193	7.906	4.213	11.063	9.59	9.937	16.628	11.411	7.945			0.304	0.259
284	421	530			0.052558	0.119602	0.067333			17.026	6.616	4.997	10.491	10.326	9.215	13.403	11.488	10.154			0.352	0.094
64	347	543			0.115806	0.137072	0.094723			18.578	7.428	4.302	10.499	11.138	7.523	16.301	8.693	7.589			0.138	0.083
42	515	378			0.138968	0.095413	0.106135			24.494	5.506	7.746	9.813	13.717	8.354	14.27	10.493	8.833			0.314	0.154
199	369	328			0.114915	0.178731	0.183739			20.756	7.324	6.737	23.927	12.673	10.505	11.885	11.625	7.997			0.274	0.042
131	336	333			0.151439	0.094069	0.061627			14.053	8.04	6.905	14.844	13.709	7.755	13.695	11.538	8.564			0.323	0.264
133	359	487			0.057903	0.118258	0.060485			21.304	8.591	6.457	19.19	16.539	8.72	12.858	12.248	11.055			0.274	0.094
167	536	509			0.067702	0.072567	0.058203			15.602	6.093	7.383	17.017	14.431	8.117	14.715	9.242	10.4			0.42	0.216
228	356	431			0.050777	0.111539	0.061627			17.682	5.995	6.58	14.736	9.585	10.385	13.246	10.729	10.724			0.268	0.284
125	273	494			0.066811	0.05241	0.070757			21.752	8.938	6.18	15.959	9.598	8.336	12.594	9.915	10.96			0.585	0.181
167	284	461			0.09799	0.107507	0.038802			17.313	8.249	6.654	16.136	14.681	10.422	11.439	10.814	7.23			0.607	0.057
241	291	348			0.044541	0.172012	0.116406			18.269	8.257	6.86	18.161	14.33	10.997	14.181	12.507	12.189			0.294	0.238
297	341	409			0.044541	0.306396	0.037661			17.246	7.435	6.895	13.183	15.292	9.649	19.287	11.353	13.845			0.198	0.181
118	256	559			0.215578	0.157229	0.084451			14.095	7.305	6.544	16.469	12.575	10.008	14.577	9.843	12.604			0.316	0.03
87	389	312			0.058794	0.200232	0.135807			16.612	8.461	6.415	15.814	10.483	10.686	15.891	13.308	9.367			0.32	0.019
134	416	379			0.416012	0.428685	0.075322			24.183	7.695	5.348	18.61	15	13.781	12.562	12.772	8.196			0.218	0.026
167					0.07661	0.083318	0.134666			21.128	6.87	5.804	17.459	12.715	12.479	12.826	12.928	7.453			0.221	0.206
					0.052558	0.251298	0.055921			21.153	6.353	6.468	17.783	10.139	9.929	13.618	12.242	7.414				0.026
					0.407994	0.067192	0.23053			21.548	5.97		13.372	9.153	12.39	13.475	13.229	7.808				0.074
					0.038305	0.064504	0.165479			21.813	9.305		16.777	8.858	9.094	15.663	13.105	8.25				0.265
					0.104226	0.090037	0.053638			16.022	7.97		17.988	8.675	10.068	16.015	11.581	9.022				0.103
					0.154111	0.072567	0.130101			20.274	7.645		15.132		10.537	8.432	10.158	10.9
					1.15539	0.037628	0.106135			13.839	9.825		15.135		8.618	16.822	11.291	9.148
					0.399086	0.06988	0.144937			18.158	7.553		7.719		13.044	12.605
					0.280607	0.061817	0.099287			13.909	6.308		16.72		9.815	10.724
					0.622681	0.099444	0.112982			17.355			16.185		12.02
					0.136295	0.227109	0.07418						16.068		10.439
					0.37058	0.102132	0.058203						15.362		9.942
					0.129169	0.103476	0.116406						13.42
					0.050777	0.151854	0.103852						12.615
					0.047213	0.038971	0.045649						17.363
					0.074829	0.065848	0.062768						20.636
					0.671676	0.06988	0.273896						15.04
					0.840931	0.05241	0.081028
					0.073938	0.08063	0.094723
					0.497967	0.08063	0.173468
					0.041868	0.086006	0.213411
					0.112243	0.0981	0.116406
					0.203997	0.065848	0.069615
					0.040978	0.06988	0.124395
					0.068593	0.154542	0.049073
					0.223595	0.176043	0.223682
					0.049886	0.146479	0.117547
					0.091754	0.232484	0.069615
					0.262791	0.112883	0.051356
					0.041868	0.060473	0.044508
					0.528255	0.051066	0.306992
					0.154111	0.08063	0.297862
					0.148766	0.049722	0.188304
					0.131841	0.045691	0.052497
					0.059685	0.075255	0.429104
					0.200434	0.407184	0.104994
					0.672567	0.05241	0.16662
					0.048104	0.319834	0.346935
					0.050777	0.123633	0.075322
					0.04365	0.116914	0.146078
					0.073047	0.094069	0.058203
					0.3492	0.057785	0.039943
					0.929122	0.138416	0.090158
					0.247647	0.13304	0.151784
					0.063248	0.120946	0.054779
					0.073938	0.084662	0.131242
					0.146985	0.064504	0.118688
					0.246756	0.057785	0.055921
					0.115806	0.157229	0.053638
					0.602192	0.204264	0.050214
					0.277044	0.210983	0.11983
					0.109571	0.120946	0.042226
					0.069484	0.065848	0.215693
					0.089082	0.35343	0.136948
					0.096208	0.10482	0.182598
					0.226268	0.225765	0.070757
					1.1064	0.106163	0.540945
					0.073938	0.12229	0.046791
					0.178163	0.10482	0.457635
					0.18529	0.047034	0.086734
					0.176382	0.366868	0.07418
					0.097099	0.096757	0.090158
					0.266354	0.116914	0.25906
					0.243193	0.084662	0.219117
					0.11937	0.585914	0.078745
					0.04365	0.086006	0.054779
					0.15233	0.08063	0.073039
					0.215578	0.061817	0.139231
					0.098881	0.108851	0.054779
					0.096208	0.124977	0.058203
					0.56656	0.092725	0.283026
					0.51222	0.067192	0.047932
					0.473024	0.06988	0.217976
					0.106898	0.123633	0.087875
					0.042759	0.118258	0.093581
					0.071265	0.064504	0.094723
					0.723343	0.040315	0.107276
					0.073047	0.079287	0.147219
					0.354545	0.057785	0.066192
					0.066811	0.129009	0.251072
					0.073938	0.326553	0.123253
					0.048995	0.267424	0.050214
					0.062357	0.215015	0.382314
					0.248538	0.068536	0.156349
					0.068593	0.110195	0.049073
					0.427592	0.079287	0.152926
					0.040978	0.041659	0.055921
					0.158565	0.119602	0.248789
					0.047213	0.130353	0.08331
					0.080174	0.275487	0.090158
					0.309114	0.037628	0.11983
					0.408885	0.221734	0.052497
					0.231612	0.064504	0.229388
					0.187072	0.194857	0.114124
					0.068593	0.100788	0.152926
					0.224486	0.061817	0.200857
					0.422247	0.056441	0.062768
					0.140749	0.176043	0.407421
					0.042759	0.040315	0.327534
					0.255665	0.137072	0.197434
					0.057903	0.228453	0.077604
					0.562996	0.095413	0.130101
					0.084628	0.151854	0.062768
					0.576359	0.067192	0.093581
					1.31663	0.20292	0.451929
					0.117588	0.057785	0.073039
					0.078392	0.70686	0.097005
					0.077501	0.092725	0.09244
					0.976336	0.233828	0.12896
					0.052558	0.123633	0.151784
					0.045432	0.037628	0.112982
					0.669894	0.088693	0.100429
					0.073938	0.107507	0.199716
					0.245866	0.099444	0.052497
					0.252101	0.103476	0.243083
					0.073938	0.037628	0.098146
					0.072156	0.056441	0.16662
					0.062357	0.041659	0.167762
					0.244084	0.044347	0.063909
					0.350091	0.13304	0.118688
					0.078392	0.217702	0.350359
					0.062357	0.579195	0.07418
					0.143422	0.053754	0.162055
					0.217359	0.041659	0.136948
					0.367907	0.049722	0.081028
					0.145203	0.071224	0.231671
					0.398195	0.037628	0.107276
					0.996824	0.204264	0.084451
					0.064139	0.065848	0.159773
					0.05434	0.065848	0.063909
					0.063248	0.192169	0.18488
					0.060576	0.038971	0.039943
					0.050777	0.051066	0.199716
					0.037414	0.056441	0.082169
					0.209342	0.280863	0.222541
					0.390178	0.278175	0.127818
					0.09799	0.063161	0.189445
					0.219141	0.116914	0.354924
					0.102444	0.219046	0.047932
					0.186181	0.090037	0.053638
					0.096208	0.106163	0.261343
					0.307332	0.051066	0.099287
					0.197761	0.038971	0.367478
					0.307332	0.06988	0.063909
					0.497967	0.056441	0.289874
					0.068593	0.274143	0.039943
					0.037414	0.173355	0.459918
					0.062357	0.645043	0.459918
					0.096208	0.26608	0.058203
					0.438282	0.116914	0.084451
					0.038305	0.31849	0.098146
					0.159456	0.083318	0.197434
					0.047213	0.146479	0.179174
					0.327821	0.08063	0.038802
					0.044541	0.063161	0.271614
					0.092645	0.057785	0.070757
					0.061466	0.107507	0.131242
					0.048104	0.055097	0.181456
					0.333166	0.060473	0.422257
					0.275263	0.037628	0.134666
					0.040978	0.072567	0.987168
					0.162129	0.131696	1.43567
					1.03958	0.306396	0.059344
					0.140749	0.267424	0.107276
					0.208451	0.143791	0.059344
					0.264573	0.417934	0.196292
					0.090863	0.068536	0.055921
					0.145203	0.060473	0.090158
					0.969209	0.165292	0.120971
					0.34831	0.330585	0.045649
					0.177273	0.071224	0.745226
					0.425811	0.059129	0.376608
					0.088191	0.084662	0.829678
					0.12026	0.131696	0.958637
					0.445409	0.251298	0.047932
					0.057012	0.141103	0.111841
					0.150548	0.165292	0.050214
					0.133623	0.102132	0.127818
					0.085518	0.059129	0.963202
					0.086409	0.305052	0.278461
					0.057903	0.169324	0.709848
					0.048995	0.327897	0.349218
					0.388396	0.044347	0.232812
					0.195089	0.075255	0.205422
					0.111352	0.043003	0.19401
					0.187962	0.194857	0.176891
					0.474806	0.107507	0.168903
					0.50153	0.08735	0.205422
					0.098881	0.096757	0.31384
					0.075719	0.229797	0.081028
					0.051667	0.037628	0.245366
					0.055231	0.718955	0.319546
					0.048104	0.153198	0.514697
					0.182618	0.088693	0.302427
					0.309114	0.064504	0.276179
					0.247647	0.131696	0.042226
					0.114025	0.044347	0.076463
					0.062357	0.119602	0.267049
					0.155893	0.112883	0.107276
					0.361672	0.040315	0.26819
					0.1746	0.049722	0.124395
					0.100662	0.142447	0.046791
					0.118479	0.049722	0.183739
					0.140749	0.040315	0.043367
					0.045432	0.045691	0.138089
					0.046322	0.06988	0.093581
					0.049886	0.249954	0.057062
					0.081064	0.319834	0.111841
					0.062357	0.06988	0.149502
					0.053449	0.309083	0.291015
					0.195089	0.06988	0.054779
					0.147876	0.08735	0.046791
					0.148766	0.092725	0.047932
					0.052371	0.314459	0.037661
					0.048298	0.120946	0.042226
					0.136164	0.176043	0.061627
					0.062845	0.131696	0.087875
					0.087867	0.120946	0.156349
					0.065173	0.124977	0.287591
					0.156531	0.219046	0.054779
					0.160022	0.448843	0.60942
					0.069246	0.08735	0.332099
					0.045388	0.077943	0.182598
					0.037823	0.177387	0.223682
					0.272328	0.072567	0.077604
					0.057608	0.044347	0.20314
					0.064009	0.184106	0.127818
					0.302587	0.149166	0.132383
					0.040733	0.056441	0.082169
					0.046552	0.073911	0.181456
					0.243815	0.163949	0.486166
					0.037241	0.201576	0.122112
					0.069246	0.0981	0.12896
					0.286876	0.049722	0.120971
					0.097759	0.139759	0.082169
					0.47832	0.086006	0.103852
					0.054698	0.041659	0.238518
					0.115216	0.065848	0.271614
					0.062263	0.217702	0.132383
					0.07041	0.103476	0.144937
					0.335173	0.11557	0.141513
					0.047134	0.165292	0.755498
					0.107069	0.329241	0.076463
					0.125108	0.165292	0.141513
					0.160604	0.256674	0.087875
					0.299677	0.154542	0.214552
					0.153621	0.184106	0.061627
					0.292113	0.037628	0.043367
					0.050625	0.075255	0.353783
					0.1961	0.037628	0.1107
					0.264764	0.048378	0.156349
					0.335755	0.067192	0.411986
					0.095431	0.095413	0.200857
					0.065754	0.173355	0.227106
					0.280475	0.233828	0.247648
					0.083793	0.060473	0.124395
					0.236833	0.338648	0.094723
					0.179807	0.11557	0.112982
					0.123944	0.044347	0.158632
					0.083211	0.064504	0.147219
					0.053535	0.041659	0.151784
					0.108815	0.037628	0.134666
					0.066336	0.090037	0.172327
					0.127436	0.075255	0.151784
					0.236833	0.045691	0.043367
					0.186789	0.118258	0.147219
					0.124526	0.083318	0.061627
					0.341574	0.040315	0.114124
					0.105324	0.083318	0.06505
					0.057026	0.038971	0.053638
					0.918817	0.224421	0.394867
					0.484721	0.198888	0.232812
					0.112888	0.044347	0.076463
					0.244979	0.196201	0.100429
					0.11638	0.180075	0.29558
					0.091358	0.084662	0.227106
					0.359031	0.159917	0.071898
					0.072155	0.08063	0.089016
					0.058772	0.072567	0.235094
					0.147802	0.103476	0.191728
					0.485885	0.110195	0.043367
					0.049461	0.190825	0.241942
					0.711079	0.059129	0.07418
					0.039569	0.123633	0.044508
					0.048298	0.094069	0.106135
					0.096595	0.090037	0.131242
					0.143729	0.041659	0.046791
					0.056444	0.13304	0.052497
					0.063427	0.124977	0.057062
					0.061099	0.043003	0.097005
					0.052953	0.044347	0.042226
					0.547566	0.090037	0.049073
					0.194936	0.048378	0.051356
					0.117543	0.076599	0.114124
					0.105324	0.124977	0.120971
					0.626122	0.131696	0.156349
					0.20541	0.060473	0.143796
					0.120453	0.094069	0.060485
					0.265346	0.129009	0.053638
					0.046552	0.038971	0.114124
					0.463773	0.112883	0.124395
					0.413729	0.124977	0.052497
					0.065754	0.18545	0.045649
					0.048298	0.043003	0.301286
					0.065754	0.124977	0.235094
					0.569096	0.076599	0.066192
					0.187371	0.057785	0.125536
					0.069246	0.041659	0.052497
					0.0675	0.155886	0.050214
					0.124526	0.114226	0.228247
					0.075647	0.116914	0.086734
					0.071573	0.037628	0.071898
					0.274656	0.137072	0.044508
					0.05528	0.041659	0.054779
					0.296186	0.092725	0.063909
					0.147802	0.155886	0.134666
					0.295022	0.331929	0.144937
					0.308406	0.100788	0.078745
					0.096013	0.100788	0.118688
					0.130927	0.155886	0.126677
					0.217048	0.103476	0.044508
					0.0675	0.056441	0.152926
					0.663364	0.221734	0.182598
					0.155367	0.079287	0.248789
					0.038405	0.135728	0.090158
					0.065173	0.068536	0.057062
					0.048298	0.141103	0.159773
					0.346811	0.153198	0.038802
					0.040151	0.127665	0.043367
					0.042479	0.073911	0.112982
					0.054698	0.108851	0.278461
					0.08903	0.194857	0.076463
					0.072155	0.044347	0.125536
					0.085539	0.08735	0.070757
					0.076811	0.146479	0.052497
					1.40005	0.197545	0.310416
					0.124526	0.188138	0.045649
					0.138492	0.084662	0.118688
					0.118707	0.206951	0.12896
					0.091358	0.043003	0.138089
					0.064591	0.139759	0.195151
					0.136164	0.060473	0.109559
					0.046552	0.096757	0.038802
					0.269419	0.116914	0.054779
					0.095431	0.10482	0.09244
					1.36455	0.174699	0.042226
					0.396854	0.194857	0.150643
					0.325281	0.055097	0.097005
					0.085539	0.077943	0.12896
					0.054698	0.038971	0.084451
					0.048298	0.064504	0.17575
					0.040151	0.193513	0.076463
					0.471337	0.056441	0.219117
					0.15013	0.06988	0.068474
					0.318298	0.037628	0.140372
					0.090776	0.084662	0.070757
					0.050043	0.084662	0.042226
					0.076811	0.056441	0.248789
					0.102996	0.081974	0.132383
					0.064591	0.114226	0.16662
					0.157112	0.077943	0.051356
					0.080302	0.051066	0.039943
					0.058772	0.126321	0.076463
					0.109979	0.047034	0.108417
					0.167587	0.038971	0.236236
					0.119289	0.065848	0.042226
					0.080302	0.072567	0.068474
					0.037823	0.053754	0.037661
					0.04306	0.038971	0.158632
					0.040151	0.05504	0.098146
					0.065754	0.073911	0.052497
					0.068082	0.045605	0.100429
					0.093686	0.051895	0.058203
					0.093104	0.147823	0.127818
					0.059935	0.122662	0.141513
					0.057026	0.050323	0.198575
					0.083817	0.08492	0.225965
					0.05464	0.04246	0.109559
					0.116707	0.039315	0.054779
					0.061006	0.099073	0.160914
					0.038725	0.092782	0.045649
					0.037664	0.095928	0.144937
					0.081164	0.106936	0.150643
					0.100262	0.047178	0.123253
					0.576108	0.196573	0.049073
					0.10875	0.303509	0.100429
					0.097609	0.0975	0.237377
					0.063128	0.116371	0.043367
					0.062597	0.070766	0.050214
					0.064719	0.061331	0.058203
					0.358608	0.04875	0.086734
					0.143762	0.185565	0.172327
					0.354365	0.053468	0.125536
					0.056762	0.050323	0.073039
					0.090713	0.037742	0.156349
					0.082756	0.110081	0.1107
					0.050927	0.114799	0.141513
					0.042439	0.331815	0.278461
					0.084347	0.053468	0.235094
					0.181957	0.122662	0.123253
					0.128378	0.111653	0.116406
					0.42545	0.04246	0.23053
					0.456218	0.23746	0.066192
					0.049335	0.04246	0.284562
					0.066311	0.306654	0.194298
					0.072677	0.215444	0.052017
					0.103445	0.081774	0.100974
					0.231292	0.088065	0.082615
					0.255694	0.045605	0.1637
					0.369749	0.058186	0.065786
					0.07639	0.125807	0.071905
					0.094426	0.045605	0.107093
					0.064189	0.072339	0.182059
					0.042969	0.110081	0.120862
					0.136865	0.04246	0.045897
					0.040847	0.111653	0.100974
					0.048805	0.110081	0.16676
					0.041378	0.261049	0.076495
					0.135804	0.154113	0.15605
					0.067372	0.050323	0.048957
					0.16339	0.229597	0.122392
					0.340572	0.155686	0.038248
					0.037134	0.163549	0.071905
					0.041378	0.125807	0.15299
					0.039256	0.037742	0.045897
					0.189383	0.135242	0.062726
					0.097609	0.150968	0.177469
					0.080634	0.268912	0.099444
					0.444547	0.045605	0.093324
					0.046152	0.314517	0.053547
					0.376114	0.073911	0.15911
					0.781936	0.088065	0.042837
					0.067902	0.165121	0.15758
					0.420675	0.209154	0.192768
					0.125725	0.267339	0.110153
					0.34906	0.289355	0.279972
					0.050927	0.04875	0.143811
					0.197341	0.088065	0.188178
					0.048805	0.232742	0.123922
					0.049866	0.100645	0.065786
					0.037134	0.235888	0.082615
					0.115646	0.163549	0.134632
					0.100262	0.050323	0.055077
					0.10875	0.308226	0.074965
					0.405822	0.040887	0.197358
					0.548522	0.141533	0.042837
					0.173469	0.064476	0.073435
					0.091774	0.040887	0.070376
					0.140579	0.051895	0.053547
					0.040847	0.0975	0.189708
					0.047744	0.212299	0.108623
					0.083817	0.122662	0.088734
					0.785119	0.039315	0.100974
					0.055701	0.114799	0.374826
					0.077981	0.132097	0.067316
					0.045622	0.080202	0.097914
					0.634461	0.0975	0.058136
					0.045091	0.257904	0.045897
					0.084878	0.143105	0.15452
					0.270017	0.283065	0.090264
					0.322535	0.144678	0.099444
					0.067372	0.047178	0.143811
					0.396803	0.301936	0.055077
					0.074268	0.095928	0.091794
					0.067902	0.122662	0.078025
					0.155963	0.122662	0.053547
					0.051988	0.061331	0.133102
					0.058353	0.116371	0.130042
					0.053579	0.201291	0.171349
					0.116176	0.056613	0.114743
					0.389377	0.099073	0.107093
					0.859387	0.102218	0.039778
					0.047213	0.070766	0.073435
					0.364444	0.069194	0.192768
					0.0435	0.04875	0.142281
					0.254633	0.232742	0.117803
					0.046152	0.169839	0.093324
					0.045091	0.108508	0.096384
					0.804747	0.070766	0.131572
					0.096548	0.059758	0.201947
					0.063128	0.095928	0.102504
					0.088061	0.094355	0.039778
					0.095487	0.108508	0.146871
					0.039786	0.067621	0.105563
					0.04403	0.143105	0.076495
					0.045622	0.040887	0.122392
					0.040847	0.078629	0.126982
					0.0435	0.037742	0.420724
					0.04403	0.498509	0.180529
					0.075329	0.058186	0.067316
					0.053579	0.342823	0.073435
					0.037664	0.072339	0.102504
					0.486455	0.047178	0.209597
					0.07692	0.080202	0.042837
					0.083817	0.333388	0.227956
					0.059414	0.221734	0.084145
					0.0435	0.037742	0.096384
					0.083286	0.261049	0.126982
					0.077451	0.114799	0.330459
					0.039786	0.228025	0.134632
					0.115115	0.0975	0.293742
					1.48112	0.040887	0.552295
					0.772918	0.078629	0.227956
					0.039786	0.083347	0.206537
					0.789363	0.191855	0.287622
					0.082225	0.040887	0.209597
					0.089122	0.044032	0.044367
					0.074268	0.283065	0.182059
					0.148536	0.089637	0.058136
					0.089652	0.171412	0.119333
					0.049866	0.061331	0.541586
					0.13103	0.058186	0.299861
					0.060475	0.259476	0.041307
					0.085939	0.234315	0.068846
					0.102914	0.232742	0.133102
					0.066311	0.05504	0.139221
					0.165512	0.165121	0.097914
					0.149597	0.356977	0.067316
					1.08484	0.248468	0.073435
					0.161798	0.356977	0.379416
					0.062597	0.22488	0.093324
					0.122012	0.147823	0.104033
					0.041378	0.190283	0.15299
					0.181957	0.108508	0.137691
					0.038195	0.083347	0.097914
					0.094426	0.088065	0.090264
					0.047213	0.207581	0.137691
					0.05411	0.316089	0.139221
					0.05895	0.062903	0.229486
					0.079278	0.056613	0.281502
					0.137551	0.072339	0.149931
					0.151103	0.113226	0.087205
					0.063016	0.059758	0.136161
					0.160589	0.059758	0.289152
					0.048109	0.105363	0.071905
					0.203277	0.367985	0.177469
					0.090119	0.099073	0.205007
					0.24461	0.138387	0.185118
					0.044043	0.056613	0.056606
					0.084021	0.157258	0.226426
					0.588826	0.072339	0.058136
					0.126032	0.874357	0.093324
					0.195824	0.281493	0.047427
					0.175496	0.154113	0.062726
					0.254096	0.312944	0.108623
					0.277812	0.160404	0.188178
					0.342183	0.070766	0.387066
					0.091475	0.080202	0.15299
					0.076568	0.081774	0.276913
					0.243932	0.103791	0.042837
					0.105027	0.23117	0.073435
					0.040655	0.059758	1.35702
					0.363188	0.058186	0.527817
					0.245965	0.121089	0.279972
					0.037945	0.053468	0.038248
					0.054207	0.138387	0.191238
					0.081311	0.106936	0.240195
					0.093507	0.056613	0.402365
					0.037945	0.09121	0.203477
					0.071147	0.213871	0.091794
					0.044043	0.202863	0.507928
					0.155168	0.04875	0.247844
					0.148392	0.305081	0.126982
					0.437723	0.037742	0.073435
					0.073857	0.075484	0.042837
					0.222927	0.092782	0.088734
					0.0393	0.045605	0.070376
					0.117223	0.04246	0.078025
					0.117223	0.09121	0.042837
					0.042011	0.09121	0.267733
					0.069792	0.121089	0.373297
					0.123321	0.072339	0.527817
					0.163299	0.108508	0.582893
					0.102994	0.110081	0.076495
					0.451275	0.0975	0.276913
					0.840212	0.066049	0.567594
					0.201244	0.245323	0.185118
					0.50616	0.040887	0.215716
					0.062338	0.199718	0.126982
					0.071825	0.13996	0.067316
					0.147037	0.102218	0.113213
					0.369964	0.187138	0.038248
					0.115868	0.113226	0.070376
					0.142294	0.128952	0.258554
					0.123999	0.201291	0.183588
					0.256129	0.044032	0.220306
					0.420783	0.103791	0.16064
					0.91949	0.195	0.097914
					0.046754	0.037742	0.241725
					0.103671	0.14625	0.038248
					0.297462	0.144678	0.038248
					0.251386	0.04246	0.059666
					0.520389	0.039315	0.064256
					0.874091	0.058186	0.079555
					0.098251	0.330243	0.119333
					0.07589	0.105363	0.056606
					0.155168	0.179275	0.293742
					0.081988	0.32867	0.082615
					0.105027	0.405727	0.15758
					0.195824	0.077057	0.217246
					0.17143	0.501654	0.047427
					0.389614	0.061331	0.071905
					0.048109	0.319235	0.107093
					0.510225	0.278347	0.169819
					0.180917	0.070766	0.052017
					0.0393	0.103791	0.074965
					0.05895	0.759558	0.257024
					0.107737	0.061331	0.045897
					0.176851	0.064476	0.053547
					0.170753	0.196573	0.048957
					0.88561	0.344396	0.194298
					0.041333	0.141533	0.045897
					0.16601	0.053468	0.125452
					0.265615	0.047178	0.105563
					0.775841	0.09121	0.237135
					0.126032	0.106936	0.15299
					0.082666	0.105363	0.221836
					0.132808	0.18871	0.194298
					0.184982	0.172984	0.059666
					0.258839	0.18871	0.056606
					1.48528	0.044032	0.197358
					0.046076	0.221734	0.130042
					0.219539	0.251613	0.044367
					0.085376	0.160404	0.041307
					0.084021	0.045605	0.041307
					0.074535	0.062903	0.074965
					0.062338	0.169839	0.237135
					0.060306	0.193428	0.053547
					0.495996	0.512662	0.238665
					0.072502	0.089637	0.053547
					0.077923	0.053468	0.050487
					0.371319	0.04875	0.270793
					0.141616	0.537824	0.403895
					0.086732	0.039315	0.203477
					0.14636	0.220162	0.183588
					0.043366	0.075484	0.169819
					0.067759	0.062903	0.073435
					0.071825	0.218589	0.15299
					0.388259	0.289355	0.209597
					0.304916	0.058186	0.104033
					0.272391	0.073911	0.041307
					0.190403	0.056613	0.096384
					0.046076	0.092782	0.042837
					0.103671	0.317662	0.059666
					0.044721	0.149396	0.096384
					0.226993	0.039315	0.125452
					0.911359	0.207581	0.042837
					0.260195	0.317662	0.111683
					0.042688	0.058186	0.068846
					1.1763	0.072339	0.041307
					0.10977	0.047178	0.050487
					0.037945	0.191855	0.186648
					0.153813	0.23746	0.044367
					0.19108	0.193428	0.052017
					0.147037	0.111653	0.070376
					0.050819	0.080202	0.123922
					0.040655	0.143105	0.061196
					0.0393	0.059758	0.231016
					0.073857	0.056613	0.108623
					0.071147	0.297218	0.186648
					1.86608	0.072339	0.078025
					0.038623	0.165121	0.048957
					0.296784	0.150968	0.257024
					0.103671	0.37742	0.16217
					0.590181	0.04246	0.876635
					0.064371	0.04875	0.038248
					0.071147	0.050323	0.097914
					0.076568	0.18242	0.091794
					0.048109	0.261049	0.070376
					0.195146	0.070766	0.058136
					0.433658	0.050323	0.044367
					0.072502	0.157258	0.146871
					0.041333	0.163549	0.068846
					0.223605	0.314517	0.203477
					0.038623	0.294073	0.042837
					0.066404	0.144678	0.168289
					0.086732	0.066049	0.302921
					0.093507	0.073911	0.15452
					0.050142	0.069194	0.076495
					0.221572	0.157258	0.093324
					0.061661	0.27992	0.061196
					0.123321	0.053468	0.16523
					0.156523	0.059758	0.238665
					0.048786	0.198146	0.096384
					0.194468	0.067621	0.149931
					0.07318	0.150968	0.240195
					0.067759	0.152541	0.070376
					0.098928	0.066049	0.125452
					0.045399	0.100645	0.065786
					0.35438	0.037742	0.050487
					0.113835	0.099073	0.119333
					0.156523	0.130525	0.093324
					0.100961	0.064476	0.126982
					0.211408	0.080202	0.041307
					0.094185	0.039315	0.096384
					0.042688	0.047178	0.053547
					0.099606	0.069194	0.125452
					0.056918	0.080202	0.045897
					0.064371	0.062903	0.050487
					0.081988	0.215444	0.064256
					0.081311	0.13367	0.151461
					0.192436	0.141533	0.104033
					0.143605	0.157258	0.234075
					0.100671	0.069194	0.048957
					0.113995	0.130525	0.094854
					0.245756	0.128952	0.091794
					0.087841	0.113226	0.104033
					0.07353	0.100645	0.298331
					0.06514	0.0975	0.064256
					0.045894	0.08492	0.142281
					0.252665	0.190283	0.211127
					0.358271	0.047178	0.122392
					0.077477	0.083347	0.045897
					0.288196	0.056613	0.125452
					0.090802	0.045605	0.053547
					0.07353	0.051895	0.041307
					0.086854	0.212299	0.231016
					0.079945	0.172984	0.081085
					0.230952	0.062903	0.301391
					0.236874	0.113226	0.087205
					1.14094	0.110081	0.104033
					0.209238	0.056613	0.125452
					0.069582	0.044032	0.108623
					0.051816	0.119516	0.055077
					0.111528	0.243751	0.094854
					0.735295	0.078629	0.091794
					0.248717	0.138387	0.120862
					0.065634	0.05504	0.15605
					0.212199	0.047178	0.16676
					0.265002	0.193428	0.182059
					0.145579	0.044032	0.084145
					0.051323	0.080202	0.041307
					0.371596	0.047178	0.038248
					0.139657	0.047178	0.123922
					0.063166	0.083347	0.146871
					0.094749	0.152541	0.044367
					0.058725	0.220162	0.091794
					0.074517	0.108508	0.198888
					0.404659	0.081774	0.059666
					0.297079	0.127379	0.064256
					0.158409	0.080202	0.131572
					0.104126	0.217017	0.134632
					0.058231	0.051895	0.137691
					0.292638	0.04246	0.149931
					0.10758	0.152541	0.15911
					0.066621	0.058186	0.105563
					0.280794	0.618025	0.068846
					0.102152	0.149396	0.088734
					0.037505	0.105363	0.249374
					0.3637	0.114799	0.074965
					0.487071	0.103791	0.081085
					0.052803	0.218589	0.038248
					1.36893	0.059758	0.076495
					0.054777	0.088065	0.143811
					0.21368	0.064476	0.238665
					0.287703	0.158831	0.099444
					0.072543	0.073911	0.261614
					0.051816	0.061331	0.099444
					0.154955	0.105363	0.055077
					0.231445	0.108508	0.048957
					0.612911	0.08492	0.071905
					0.111035	0.080202	0.062726
					0.105113	0.183992	0.139221
					0.773294	0.067621	0.061196
					0.153968	0.209154	0.068691
					0.165318	0.155686	0.134688
					0.136696	0.13996	0.078119
					0.512239	0.050323	0.098322
					0.438216	0.099073	0.079466
					0.05231	0.671493	0.123913
					0.055271	0.185565	0.041753
					0.038985	0.13367	0.083506
					0.194927	0.135242	0.0431
					1.60285	0.077057	0.119872
					0.187032	0.04246	0.092934
					0.135709	0.256331	0.059263
					0.136202	0.130525	0.072731
					0.499409	0.064476	0.101016
					0.958351	0.169839	0.047141
					0.258094	0.099073	0.241091
					0.085867	0.264194	0.091588
					0.703712	0.066049	0.123913
					0.623767	0.037742	0.121219
					0.046388	0.061331	0.126606
					0.10758	0.053468	0.137381
					0.263522	0.089637	0.117178
					0.202823	0.103791	0.161625
					0.120904	0.064476	0.041753
					0.177162	0.066049	0.168359
					0.045401	0.160404	0.070038
					0.068595	0.111653	0.144116
					0.294118	0.086492	0.110444
					0.290664	0.037742	0.047141
					0.095243	0.119516	0.111791
					0.405153	0.149396	0.110444
					0.054777	0.067621	0.057916
					0.658805	0.037742	0.164319
					0.058231	0.110081	0.037713
					1.06939	0.113226	0.0431
					0.832019	0.051895	0.068691
					0.043427	0.051895	0.092934
					0.059712	0.094355	0.079466
					0.145085	0.09121	0.234356
					0.059712	0.056613	0.188563
					0.299547	0.103791	0.222235
					0.057738	0.218589	0.068691
					0.102645	0.0975	0.037713
					0.059712	0.130825	0.083506
					0.220095	0.079741	0.312475
					0.045894	0.129579	0.162972
					0.044414	0.076003	0.071384
					0.298066	0.180662	0.115831
					0.163838	0.068527	0.095628
					0.059218	0.198106	0.125259
					0.044907	0.074757	0.273416
					0.44019	0.109643	0.251866
					0.351856	0.231746	0.067344
					0.101165	0.171941	0.075425
					0.437229	0.1383	0.102363
					0.181603	0.1844	0.370391
					0.111528	0.161973	0.098322
					0.075997	0.074757	0.048488
					0.112515	0.154498	0.110444
					0.255626	0.05233	0.091588
					0.055271	0.122103	0.0431
					0.063588	0.038624	0.329985
					0.095096	0.118365	0.048488
					0.070463	0.059805	0.039059
					0.118011	0.079741	0.065997
					0.050985	0.084724	0.184522
					0.124312	0.109643	0.228969
					0.064161	0.155744	0.092934
					0.106553	0.130825	0.098322
					0.16785	0.071019	0.048488
					0.209669	0.068527	0.141422
					0.141498	0.195614	0.071384
					0.06989	0.094692	0.049834
					0.090513	0.049838	0.121219
					0.065307	0.038624	0.49565
					0.060151	0.183154	0.1724
					0.083066	0.054822	0.068691
					0.091086	0.069773	0.110444
					0.281278	0.047346	0.084853
					0.050985	0.158235	0.102363
					0.178735	0.043608	0.207419
					0.037809	0.118365	0.048488
					0.176443	0.286568	0.255906
					0.05786	0.062297	0.041753
					0.060724	0.124595	0.226275
					0.06588	0.191876	0.191256
					0.147227	0.083479	0.110444
					0.041246	0.057314	0.417531
					0.077337	0.093446	0.206072
					0.117438	0.308995	0.165666
					0.119729	0.180662	0.113138
					0.162121	0.120857	0.082159
					0.15582	0.19686	0.257253
					0.125458	0.115873	0.251866
					0.069317	0.068527	0.245131
					0.050412	0.057314	0.075425
					0.059578	0.250436	0.44851
					0.091659	0.118365	0.044447
					0.166704	0.237976	0.148156
					0.099106	0.302765	0.048488
					0.405017	0.215549	0.125259
					0.295027	0.24296	0.095628
					0.654214	0.163219	0.210113
					0.112282	0.180662	0.084853
					0.533912	0.24296	0.146809
					0.103116	0.125841	0.109097
					0.042392	0.231746	0.041753
					0.112855	0.095938	0.041753
					0.046402	0.185646	0.063303
					0.072754	0.120857	0.056569
					0.936638	0.05856	0.052528
					0.083639	0.10466	0.121219
					0.048694	0.115873	0.162972
					0.1879	0.113381	0.34076
					0.060151	0.047346	0.055222
					0.108272	0.199352	0.045794
					0.145508	0.219287	0.533363
					0.169569	0.246698	0.246478
					0.055568	0.322701	0.0862
					0.200503	0.056068	0.144116
					0.192483	0.113381	0.136034
					2.36651	0.049838	0.316516
					0.079056	0.122103	0.273416
					0.044111	0.229254	0.1293
					0.126604	0.132071	0.060609
					0.149518	0.185646	0.268028
					0.411319	0.069773	0.049834
					0.156393	0.072265	0.354228
					0.077337	0.077249	0.057916
					0.075618	0.24919	0.071384
					0.135197	0.152006	0.078119
					0.042965	0.114627	0.168359
					0.198212	0.464739	0.678825
					0.055568	0.210565	0.059263
					0.044111	0.189384	0.076772
					0.148945	0.317717	0.055222
					0.613541	0.048592	0.061956
					0.082493	0.417393	0.119872
					1.02085	0.095938	0.126606
					0.17988	0.10466	0.149503
					0.273258	0.067281	0.037713
					0.222845	0.143284	0.059263
					0.527038	0.084724	0.049834
					0.063015	0.061051	0.079466
					0.30362	0.308995	0.070038
					0.13978	0.09843	0.041753
					0.039528	0.128333	0.192603
					0.055568	0.094692	0.119872
					0.049839	0.122103	0.044447
					0.786546	0.051084	0.059263
					0.071608	0.072265	0.059263
					0.041246	0.0461	0.443122
					0.098533	0.057314	0.226275
					0.072181	0.082233	0.095628
					0.30763	0.15076	0.153544
					0.47147	0.05856	0.153544
					0.09395	0.059805	0.098322
					0.508706	0.134562	0.277456
					0.179307	0.124595	0.523935
					0.453711	0.286568	0.354228
					0.194202	0.05856	0.359616
					0.040101	0.170695	0.096975
					0.114573	0.255419	0.418878
					0.10598	0.069773	0.187216
					0.226283	0.066035	0.098322
					0.05786	0.743831	0.083506
					0.053277	0.176925	0.187216
					0.146654	0.078495	0.226275
					0.041819	0.062297	0.080813
					0.060724	0.322701	0.0431
					0.040674	0.037378	0.059263
					0.093377	0.044854	0.355575
					0.127177	0.19686	0.079466
					0.230865	0.127087	0.099669
					0.234303	0.043608	0.558953
					0.175297	0.2305	0.039059
					0.040101	0.0922	0.082159
					0.037809	0.041116	0.051181
					0.054995	0.088462	0.199338
					0.080201	0.128333	0.192603
					0.403871	0.318963	0.125259
					0.151237	0.373784	0.122566
					0.038955	0.180662	0.712497
					0.200503	0.120857	0.061956
					0.087076	0.292798	0.091588
					0.087076	0.179417	0.083506
					0.107126	0.095938	0.27611
					0.206232	0.038624	0.096975
					0.138061	0.073511	0.090241
					0.360333	0.118365	0.19395
					0.13577	0.0461	0.375778
					0.164413	0.229254	0.041753
					0.189619	0.372538	0.052528
					0.040674	0.072265	0.0431
					0.168423	0.113381	0.71115
					0.118584	0.074757	0.134688
					0.493811	0.105906	0.1293
					0.063588	0.094692	0.404063
					0.092804	0.39372	0.355575
					0.087076	0.0922	0.171053
					0.202795	0.214303	0.080813
					0.076191	0.057314	0.047141
					0.134051	0.072265	0.189909
					0.32367	0.122103	0.227622
					0.040101	0.047346	0.0431
					0.547088	0.244206	0.123913
					0.082493	0.123349	0.040406
					0.226283	0.115873	0.19395
					0.142644	0.363817	0.088894
					0.269248	0.262895	0.134688
					0.182745	0.057314	0.332678
					0.189046	0.044854	0.065997
					0.104262	0.160727	0.090241
					0.073327	0.109643	0.138728
					0.10598	0.178171	0.078119
					0.208524	0.087216	0.102363
					0.106553	0.078495	0.152197
					0.154674	0.189384	0.266681
					0.07791	0.041116	0.791963
					0.319087	0.068527	0.105056
					0.256644	0.03987	0.037713
					0.363771	0.089708	0.071384
					0.131187	0.147022	0.040406
					0.049267	0.057314	0.1724
					0.110563	0.044854	0.037713
					0.223991	0.074757	0.071384
					0.042392	0.160727	0.303047
					0.118584	0.347619	0.0431
					0.084784	0.127087	0.149503
					0.39356	0.19686	0.039059
					0.221127	0.043608	0.19395
					1.50664	0.224271	0.395981
					0.368354	0.180662	0.169706
					0.0739	0.057314	0.226275
					0.115146	0.051084	0.056569
					0.084784	0.14453	0.334025
					0.153528	0.185646	0.084853
					0.046402	0.048592	0.080813
					0.352886	0.331422	0.1293
					0.30362	0.077249	0.115831
					0.081347	0.090954	0.102363
					0.798004	0.044854	0.127953
					0.401007	0.109643	0.144116
					0.23774	0.139546	0.138728
					0.09395	0.093446	0.453897
					0.555108	0.159481	0.0431
					0.809461	0.03987	0.041753
					0.522455	0.373784	0.092934
					0.173006	0.082233	0.067344
					0.323097	0.304011	0.183175
					0.364343	0.265387	0.045794
					0.346585	0.307749	0.2155
					0.194775	0.090954	0.074078
					0.247479	0.068527	0.080813
					0.459439	0.257911	0.210113
					0.080774	0.463493	0.051181
					0.780245	0.069773	0.041753
					0.079629	0.416147	0.140075
					0.202795	0.19686	0.076772
					0.040101	0.102168	0.203378
					0.186755	0.211811	0.218194
					0.158111	0.558185	0.056569
					0.052704	0.054822	0.176441
					0.307057	0.164465	0.133341
					0.968718	0.053576	0.425613
					0.295027	0.281584	0.133341
					0.575159	0.056068	0.690947
					0.764777	0.149514	0.068691
					0.052131	0.14453	0.496997
					0.568857	0.053576	0.949547
					0.543078	0.056068	0.051181
					0.604948	0.240468	0.0862
					0.092232	0.983053	0.138728
					1.00023	0.122103	0.078119
					0.197639	0.305257	0.119872
					0.111709	0.169449	0.168359
					0.080201	0.300273	0.057916
					0.120875	0.154498	0.183175
					0.042965	0.043608	0.037713
					0.05385	0.084724	0.096975
					0.542505	0.125841	0.117178
					0.272112	0.097184	0.051181
					0.073327	0.363817	0.090241
					0.294454	0.069773	0.137381
					0.044111	0.223025	0.079466
					0.049267	0.073511	0.080813
					0.302474	0.10466	0.115831
					0.060724	0.066035	0.484875
					0.208524	0.038624	0.140075
					0.105408	0.311487	0.23301
					0.131187	0.127087	0.052528
					0.042392	0.480936	0.045794
					0.056714	0.10466	0.226275
					0.072181	0.084724	0.039059
					0.064161	0.103414	0.1293
					0.0739	0.044854	0.047141
					0.504123	0.042362	0.192603
					0.062443	0.053576	0.051181
					0.634737	0.037378	0.212806
					0.069317	0.237976	0.125259
					0.071036	0.272863	0.078119
					0.064734	0.127087	0.149503
					0.045829	0.145776	0.148156
					0.493239	0.129579	0.413491
					0.059005	0.225517	0.0862
					0.049839	0.038624	0.294966
					0.346585	0.082233	0.075425
					0.050985	0.158235	0.123913
					0.456575	0.062297	0.164319
					0.117438	0.310241	0.1293
					0.178735	0.0461	0.06465
					0.054422	0.097184	0.098322
					0.304765	0.048592	0.094281
					0.104835	0.250436	0.203378
					0.061297	0.380014	0.051181
					0.217117	0.160727	0.136034
					0.0739	0.080987	0.114484
					0.190765	0.363817	0.067344
					0.111709	0.05233	0.119872
					0.627289	0.171941	0.079466
					0.084211	0.107152	0.063303
					0.196493	0.090954	0.117178
					0.054422	0.510839	0.121219
					0.134051	0.1844	0.127953
					0.405017	0.844753	0.068691
					0.041819	0.127087	0.148156
					0.044684	0.833539	0.375778
					0.060151	0.102168	0.118525
					0.099106	0.47969	0.061956
					0.098533	0.071019	0.0862
					0.190765	0.220533	0.044447
					0.038382	0.510839	0.063303
					0.066453	0.503363	0.158931
					0.07791	0.067281	0.125259
					0.108272	0.540741	0.098322
					0.211388	0.094692	0.095628
					0.047548	0.074757	0.065997
					0.087649	0.161973	0.105056
					0.037236	0.078495	0.115831
					0.237167	0.072265	0.0431
					0.053277	0.053576	0.053875
					0.113428	0.0461	0.060609
					0.090513	0.117119	0.131994
					0.043538	0.105906	0.052528
					0.067598	0.079741	0.168359
					0.055778	0.074757	0.065997
					0.039044	0.105906	0.087547
					0.162453	0.074757	0.082159
					0.041485	0.053576	0.126606
					0.060658	0.068527	0.049834
					0.194177	0.042362	0.057916
					0.452149	0.074757	0.168359
					0.079135	0.418638	0.050261
					0.183718	0.05856	0.110574
					0.343731	0.110889	0.082428
					0.326649	0.066035	0.094491
					0.554989	0.130825	0.08846
					0.141885	0.122103	0.104543
					0.248908	0.088462	0.124648
					0.215442	0.113381	0.038198
					0.425306	0.047346	0.066345
					0.068676	0.247944	0.080418
					0.134564	0.05233	0.080418
					0.134215	0.220533	0.038198
					0.106675	0.100922	0.124648
					0.77078	0.294044	0.066345
					0.16071	0.078495	0.114595
					0.061007	0.082233	0.096501
					0.201149	0.165711	0.174909
					0.272265	0.330176	0.04624
					0.245422	0.147022	0.102533
					0.149206	0.250436	0.114595
					0.113299	0.156989	0.237232
					0.542091	0.059805	0.04624
					0.144325	0.071019	0.078407
					0.126197	0.099676	0.186971
					0.103189	0.188138	0.080418
					0.120968	0.037378	0.106554
					0.04009	0.23673	0.078407
					0.267734	0.057314	0.261358
					0.056824	0.122103	0.096501
					0.058915	0.29529	0.100522
					0.0753	0.089708	0.094491
					0.390793	0.178171	0.152794
					0.567191	0.103414	0.257337
					0.050897	0.05856	0.245274
					0.75823	0.083479	0.120627
					0.760321	0.296536	0.08846
					0.519082	0.038624	0.114595
					0.062401	0.125841	0.118616
					0.128289	0.718912	0.176919
					0.867345	0.063543	0.142742
					0.234267	0.178171	0.056292
					0.394279	0.049838	0.106554
					1.1051	0.099676	0.062324
					0.302246	0.237976	0.168877
					0.087153	0.112135	0.160836
					0.060658	0.059805	0.31564
					0.64772	0.109643	0.084439
					1.74375	0.103414	0.299556
					0.05264	0.056068	0.038198
					0.722323	0.147022	0.056292
					0.057521	0.423622	0.184961
					0.080878	0.306503	0.205065
					0.040439	0.265387	0.160836
					0.145371	0.137054	0.102533
					0.563356	0.069773	0.313629
					0.470974	0.084724	0.074386
					0.095171	0.168203	0.094491
					0.094842	0.53202	0.070366
					0.074875	0.153252	0.122637
					0.40183	0.124595	0.108564
					0.071443	0.051084	0.082428
					0.09453	0.163219	0.138721
					0.458299	0.093446	0.329713
					0.1875	0.127087	0.186971
					0.585587	0.158235	0.383995
					0.039621	0.087216	0.184961
					0.133216	0.083479	0.31564
					0.084547	0.166957	0.102533
					0.078307	0.147022	0.106554
					0.116681	0.054822	0.100522
					2.71672	0.044854	0.146762
					0.049293	0.051084	0.114595
					0.196235	0.133316	0.172898
					0.080803	0.047346	0.247285
					0.291077	0.071019	0.042219
					0.501664	0.135808	0.235222
					0.423981	0.067281	0.277441
					0.058028	0.117119	0.114595
					0.49948	0.105906	0.068355
					0.214642	0.087216	0.078407
					0.568428	0.2766	0.068355
					0.364705	0.05233	0.130679
					0.096402	0.089708	0.124648
					0.050229	0.082233	0.193003
					0.06926	0.094692	0.128668
					0.053349	0.108398	0.064334
					0.265807	0.08597	0.104543
					0.221194	0.088462	0.058303
					0.209339	0.057314	0.174909
					0.088602	0.049838	0.199034
					0.823003	0.195614	0.164856
					0.263935	0.154498	0.124648
					0.318844	0.093446	0.04624
					0.098898	0.063543	0.054282
					0.187812	0.296536	0.27141
					0.048357	0.054822	0.289504
					0.235233	0.043608	0.241253
					0.190932	0.073511	0.038198
					0.117928	0.082233	0.203055
					0.070605	0.044854	0.038198
					0.037475	0.161973	0.100522
					0.047794	0.218041	0.209086
					0.196065	0.10466	0.04624
					0.100476	0.210565	0.09248
					0.122744	0.2766	0.128668
					0.04182	0.123349	0.152794
					0.859753	0.079741	0.102533
					0.055941	0.139546	0.190992
					0.155874	0.155744	0.04624
					0.255808	0.051084	0.104543
					0.129262	0.068527	0.195013
					0.041277	0.074757	0.080418
					0.159133	0.109643	0.060313
					0.19878	0.142038	0.040209
					0.04182	0.108398	0.128668
					0.047251	0.087216	0.122637
					0.038018	0.047346	0.1347
					0.061915	0.154498	0.102533
					0.046708	0.090954	0.219138
					0.043992	0.191876	0.190992
					0.184659	0.042362	0.078407
					0.062458	0.143284	0.337755
					0.093416	0.107152	0.054282
					0.128719	0.072265	0.124648
					0.055941	0.156989	0.072376
					0.055398	0.108398	0.04624
					0.398647	0.083479	0.150783
					0.136865	0.079741	0.100522
					0.064088	0.1383	0.233212
					0.553978	0.076003	0.120627
					0.051596	0.051084	0.217128
					0.229738	0.119611	0.221149
					0.060286	0.054822	0.062324
					0.049424	0.120857	0.040209
					0.114598	0.09843	0.072376
					0.071691	0.051084	0.152794
					0.186289	0.068527	0.08846
					0.131434	0.04092	0.144752
					0.471425	0.086712	0.176919
					0.040734	0.088661	0.050261
					0.097761	0.140299	0.144752
					0.451872	0.056509	0.060313
					0.797837	0.086712	0.110574
					0.112968	0.049689	0.068355
					0.049424	0.125684	0.09047
					0.591453	0.056509	0.042219
					0.107537	0.100352	0.140731
					0.067346	0.066252	0.188982
					0.555064	0.244548	0.104543
					0.184659	0.108147	0.148773
					0.135236	0.086712	0.08846
					0.126003	0.11107	0.102533
					0.911349	0.038972	0.124648
					0.080381	0.064304	0.052272
					0.06626	0.084764	0.126658
					0.362801	0.049689	0.112585
					0.1499	0.094507	0.076397
					0.976522	0.042869	0.104543
					0.095588	0.073072	0.084439
					0.254178	0.077944	0.233212
					0.077666	0.041895	0.40812
					0.159133	0.038972	0.050261
					0.185746	0.128607	0.174909
					0.489891	0.072098	0.040209
					0.287851	0.074046	0.142742
					0.470338	0.302032	0.231201
					0.679981	0.04774	0.203055
					0.609919	0.037023	0.2694
					0.043449	0.370232	0.054282
					0.135779	0.04774	0.124648
					0.703335	0.041895	0.444308
					0.043449	0.159785	0.661436
					0.129262	0.132504	0.048251
					0.120572	0.175373	0.056292
					1.84062	0.328338	0.201044
					0.536055	0.161733	0.128668
					0.067889	0.189013	0.162846
					0.320438	0.096455	0.09047
					0.339447	0.110095	0.040209
					0.143383	0.164656	0.365901
					0.634359	0.074046	0.142742
					0.0592	0.083789	0.132689
					0.255265	0.037998	0.08846
					0.108623	0.09743	0.207076
					0.095045	0.041895	0.102533
					0.243859	0.077944	0.104543
					0.813588	0.045792	0.118616
					0.31555	0.183168	0.040209
					0.271558	0.042869	0.040209
					0.054312	0.101327	0.110574
					0.62404	0.069175	0.08846
					0.360086	0.516377	0.13671
					0.224307	0.049689	0.062324
					0.861925	0.107173	0.062324
					0.088528	0.248445	0.168877
					0.329128	0.159785	0.22517
					0.072778	0.082815	0.576998
					0.096675	0.096455	0.398068
					0.69193	0.056509	0.106554
					0.112968	0.2767	0.22517
					0.040191	0.089635	0.09047
					0.087985	0.660572	0.418173
					0.071148	0.169527	0.398068
					0.104278	0.113018	0.080418
					0.095045	0.208499	0.054282
					0.278619	0.260137	0.142742
					0.214531	0.091584	0.08846
					0.073864	0.141273	0.122637
					0.845088	0.12471	0.293525
					0.054855	0.045792	0.140731
					0.254721	0.316646	0.09248
					0.075493	0.037998	0.066345
					0.153159	0.053586	0.217128
					0.856494	0.133479	0.275431
					0.895055	0.084764	0.357859
					0.178685	0.176348	0.054282
					0.32424	0.049689	0.040209
					0.066803	0.264034	0.050261
					0.074407	0.266957	0.04423
					0.05757	0.067226	0.050261
					0.830967	0.203628	0.050261
					0.082554	0.693699	0.283473
					0.271015	0.267931	0.066345
					0.046708	0.077944	0.070366
					0.200953	0.098404	0.054282
					0.128719	0.121787	0.130679
					0.351939	0.074046	0.068355
					0.096675	0.085738	0.170888
					0.295998	0.150042	0.190992
					0.106994	0.272803	0.17893
					0.073321	0.085738	0.070366
					0.041277	0.062355	0.203055
					0.102649	0.043843	0.27141
					0.275903	0.301057	0.082428
					0.056484	0.062355	0.062324
					0.048337	0.081841	0.18094
					0.060829	0.058458	0.150783
					0.044536	0.037023	0.068355
					0.081467	0.126658	0.048251
					0.054312	0.234805	0.038198
					0.251463	0.142247	0.116606
					0.065717	0.349772	0.084439
					0.051596	0.092558	0.122637
					0.385069	0.542683	0.074386
					0.053225	0.197782	0.520705
					0.045079	0.422844	0.390026
					0.065174	0.136401	0.082428
					2.37287	0.403358	0.257337
					0.119486	0.189988	0.337755
					0.102106	0.127633	0.070366
					0.193349	0.039946	0.086449
					0.054855	0.078918	0.162846
					0.20041	0.039946	0.170888
					0.113511	0.052612	0.223159
					0.688128	0.293263	0.122637
					0.038018	0.759951	0.126658
					2.07144	0.225062	0.195013
					0.061372	0.192911	0.174909
					0.038561	0.053586	0.052272
					0.304688	0.110095	0.219138
					1.6098	0.064304	0.080418
					0.093959	0.059432	0.076397
					0.036932	0.041895	0.066345
					0.076036	0.083789	0.303577
					0.038018	0.686878	0.054282
					0.105365	0.292289	0.297546
					0.079838	0.042869	0.072376
					0.06626	0.122761	0.253316
					0.197694	0.252343	0.174909
					0.061915	0.330286	0.062324
					0.088528	0.041895	0.2694
					0.047794	0.092558	0.114595
					0.05051	0.062355	0.291515
					0.084183	0.191936	0.050261
					0.068433	0.049689	0.231201
					0.066803	0.197782	0.233212
					0.33293	0.046766	0.110574
					0.063001	0.037023	0.392037
					0.098847	0.042869	0.197024
					0.173797	0.095481	0.170888
					0.100476	0.119838	0.078407
					0.261782	0.039946	0.068355
					0.114598	0.602115	0.17893
					0.079295	0.205576	0.190992
					0.230281	0.059432	0.098512
					0.080924	0.061381	0.094491
					0.058657	0.127633	0.042219
					0.102106	0.130556	0.070366
					0.064088	0.10425	0.042219
					0.089614	0.12471	0.221149
					0.092873	0.109121	0.140731
					0.112425	0.049689	0.285483
					0.075493	0.214345	0.108564
					0.118942	0.122761	0.2694
					0.222678	0.296186	0.04624
					0.145012	0.606012	0.186971
					0.057027	0.36731	0.22718
					0.117313	0.108147	0.038198
					0.041209	0.337106	0.096501
					0.049005	0.075021	0.084439
					0.13365	0.237728	0.060313
					0.12474	0.063329	0.184961
					0.087986	0.052612	0.150783
					0.067939	0.087687	0.070366
					0.046777	0.082815	0.096501
					0.079076	0.037998	0.144752
					0.069052	0.094507	0.04423
					0.040095	0.163682	0.04624
					0.105806	0.204602	0.146762
					0.087986	0.054561	0.174909
					0.120285	0.11789	0.084439
					0.055687	0.056509	0.166867
					0.050119	0.095481	0.108564
					0.060142	0.135427	0.229191
					0.103579	0.087687	0.164856
					0.042322	0.037998	0.114595
					0.419883	0.037998	0.156815
					0.748439	0.042869	0.04423
					0.895454	0.068201	0.062324
					0.041209	0.200705	0.086449
					0.064597	0.056509	0.102533
					0.438817	0.074046	0.13671
					0.158152	0.037998	0.04624
					0.11583	0.052612	0.283473
					0.174859	0.107173	0.120627
					1.38773	0.175373	0.048251
					0.061256	0.065278	0.156815
					1.00794	0.060406	0.04624
					0.099124	0.063329	0.289504
					0.073507	0.041895	0.076397
					0.211612	0.202654	0.251306
					0.043436	0.506634	0.108564
					0.245025	0.592372	0.474465
					0.386471	0.113993	0.108564
					0.055687	0.039946	0.094491
					0.149242	0.388744	0.40812
					0.038981	0.055535	0.215118
					0.564671	0.193885	0.102533
					0.041209	0.037998	0.118616
					0.455523	0.04092	0.170888
					0.054574	0.050663	0.060313
					0.227205	0.143222	0.084439
					1.02242	0.059432	0.076397
					0.27621	0.185116	0.18094
					2.01143	0.490071	0.124648
					0.090214	0.052612	0.367911
					0.167062	0.184142	0.04624
					0.388698	0.240651	0.110574
					0.063484	0.068201	0.197024
					0.104692	0.275726	0.22718
					0.090214	0.095481	0.066345
					0.063484	0.089635	0.154804
					0.422111	0.075995	0.09248
					0.354172	0.3108	0.1347
					0.486708	0.125684	0.050261
					0.162607	1.10777	0.164856
					2.29544	0.075995	0.257337
					0.037867	0.116916	0.074386
					0.049005	0.061381	0.04624
					0.135877	0.045792	0.094491
					0.336352	0.250394	0.17893
					0.845336	0.211422	0.130679
					0.180427	0.066252	0.176919
					0.130309	0.503711	0.062324
					0.45441	0.056509	0.152794
					0.059029	0.056509	0.217128
					0.051232	0.075021	0.144752
					0.06237	0.720979	0.205065
					0.304054	0.247471	0.09248
					0.41877	0.074046	0.04423
					0.609221	0.098404	0.082428
					0.256162	0.507608	0.108564
					0.271755	0.064304	0.040209
					0.991237	0.041895	0.104543
					0.657112	0.156862	0.098512
					1.21733	0.142247	0.038198
					0.060142	0.042869	0.160836
					0.065711	0.140299	0.068355
					0.059029	0.796974	0.058303
					0.343035	0.312749	0.074386
					1.19283	0.058458	0.116606
					0.052346	0.106198	0.064334
					0.094669	0.071124	0.064334
					0.455523	0.127633	0.054282
					0.485595	0.075021	0.138721
					0.066825	0.218242	0.042219
					0.167062	0.050663	0.060346
					0.351945	0.062355	0.079959
					0.086872	0.09743	0.052803
					0.157039	0.078918	0.067889
					1.70849	0.121787	0.104097
					0.752894	0.056509	0.144831
					0.109147	0.482276	0.05582
					0.42768	0.243574	0.129744
					0.069052	0.054561	0.063364
					0.29403	0.080867	0.07845
					0.047891	0.072098	0.039225
					0.379788	0.127633	0.116167
					0.547965	0.041895	0.049786
					0.093555	0.056509	0.061855
					0.28512	0.071124	0.102589
					0.180427	0.082815	0.060346
					0.114716	0.084764	0.203669
					0.622586	0.190962	0.170478
					0.402063	0.075995	0.039225
					0.043436	0.075021	0.144831
					0.219409	0.188039	0.152374
					0.047891	0.366335	0.147848
					0.038981	0.146144	0.085993
					0.158152	0.083789	0.217246
					1.10373	0.202654	0.110132
					0.468888	0.081841	0.120692
					0.405405	0.065278	0.04526
					0.545737	0.091584	0.108623
					0.105806	0.125684	0.069398
					0.12474	0.136401	0.120692
					0.271755	0.149067	0.092028
					0.047891	0.057483	0.048277
					0.128081	0.081841	0.150866
					0.314077	0.048715	0.131253
					0.064597	0.113018	0.05582
					0.539055	0.143222	0.070907
					0.22275	0.12471	0.171987
					0.095782	0.205576	0.039225
					0.049005	0.094507	0.096554
					0.075735	0.187065	0.060346
					0.074621	0.045792	0.081467
					0.043436	0.055535	0.070907
					0.284006	0.089635	0.251945
					0.115564	0.063329	0.111641
					0.165506	0.188039	0.039225
					0.083624	0.147119	0.046768
					0.086528	0.133479	0.093537
					0.043554	0.088661	0.076941
					0.116725	0.037998	0.039225
					0.068525	0.073072	0.075433
					0.091754	0.129581	0.061855
					0.059234	0.170502	0.054312
					0.087108	0.058458	0.170478
					0.229966	0.116916	0.117675
					0.050523	0.068201	0.058838
					0.203253	0.246497	0.085993
					0.175959	0.037023	0.061855
					0.0482	0.277674	0.173495
					0.397795	0.075021	0.122201
					0.038908	0.042869	0.076941
					0.234612	0.071124	0.063364
					0.090012	0.053586	0.458631
					0.042393	0.128607	0.05582
					0.16841	0.352695	0.105606
					0.252615	0.052612	0.215738
					0.279328	0.123736	0.087502
					0.060976	0.101327	0.283627
					0.174217	0.039946	0.048277
					0.195123	0.451099	0.120692
					0.504649	0.04774	0.079959
					0.221256	0.11789	0.128236
					0.040651	0.187065	0.095045
					1.33624	0.051638	0.35906
					0.081882	0.074046	0.250437
					0.140535	0.081841	0.117675
					0.067364	0.194859	0.073924
					0.077236	0.154913	0.1569
					0.079559	0.136401	0.04526
					0.4338	0.599192	0.144831
					0.045877	0.139324	0.167461
					0.039489	0.060406	0.171987
					0.124275	0.230908	0.042242
					0.997683	0.14517	0.309274
					0.472709	0.157836	0.245911
					0.500003	0.04774	0.168969
					0.132405	0.233831	0.390742
					0.472128	0.056509	0.150866
					0.040651	0.32444	0.117675
					0.355983	0.186091	0.066381
					0.90767	0.059432	0.12371
					0.548783	0.109121	0.546133
					0.095819	0.142247	0.221772
					0.38502	0.088661	0.149357
					0.20906	0.196808	0.126727
					0.054588	0.079892	0.067889
					0.335658	0.113018	0.054312
					0.062718	0.056509	0.113149
					0.076075	0.042869	0.138796
					0.06446	0.160759	0.232333
					0.0482	0.233831	0.13427
					0.052846	0.128607	0.173495
					0.142858	0.063329	0.049786
					0.042974	0.116916	0.064872
					0.260164	0.191936	0.063364
					0.044716	0.105224	0.223281
					0.073171	0.050663	0.170478
					0.06388	0.045792	0.057329
					0.06446	0.127633	0.10108
					0.127178	0.12471	0.087502
					0.056911	0.064304	0.132762
					0.218933	0.063329	0.187073
					0.099884	0.056509	0.161426
					0.037747	0.220191	0.33643
					0.896637	0.125684	0.420915
					0.616147	0.108147	0.089011
					0.069106	0.174399	0.089011
					1.68177	0.10425	0.037716
					0.750294	0.178296	0.102589
					0.07259	0.166605	0.069398
					0.050523	0.058458	0.28061
					0.038908	0.174399	0.058838
					0.143439	0.055535	0.052803
					0.498841	0.096455	0.061855
					0.523812	0.063329	0.250437
					0.202672	0.115941	0.51596
					0.119048	0.136401	0.117675
					0.0482	0.04774	0.064872
					0.20906	0.077944	0.304748
					0.102207	0.095481	0.039225
					0.100465	0.413101	0.253454
					0.074913	0.09743	0.061855
					0.828111	0.451099	0.102589
					0.21661	0.252343	0.128236
					0.139374	0.037023	0.048277
					0.049361	0.077944	0.405828
					0.188735	0.220191	0.040734
					0.66667	0.085738	0.079959
					0.383858	0.155887	0.098063
					0.275263	0.076969	0.07845
					0.174217	0.04774	0.081467
					0.172475	0.079892	0.541607
					0.323463	0.10425	0.063364
					1.13473	0.042869	0.10108
					0.511036	0.189988	0.107115
					0.070848	0.063329	0.051294
					0.184089	0.061381	0.32587
					0.043554	0.100352	0.037716
					0.118468	0.052612	0.289662
					0.106853	0.092558	0.143322
					0.092916	0.173425	0.048277
					0.288039	0.286443	0.137288
					0.055169	0.291314	0.300222
					0.632988	0.09743	0.119184
					0.058072	0.053586	0.073924
					0.327528	0.129581	0.04526
					0.067945	0.383873	0.105606
					0.117306	0.144196	0.51596
					0.082463	0.059432	0.223281
					0.180024	0.099378	0.21272
					0.129501	0.070149	0.084485
					0.063299	0.175373	0.066381
					0.301976	0.052612	0.05582
					0.292685	0.194859	0.079959
					0.193962	0.093532	0.687947
					0.037166	0.152964	0.270049
					0.06446	0.299109	0.241385
					0.047619	0.103275	0.537081
					0.186993	0.089635	0.436001
					0.107434	0.083789	0.060346
					0.094077	0.10425	0.046768
					0.078978	0.056509	0.446562
					0.058072	0.13153	0.093537
					0.087108	0.077944	0.039225
					0.039489	0.071124	0.075433
					0.041812	0.066252	0.04526
					0.055169	0.063329	0.241385
					0.060991	0.213371	0.132762
					0.209603	0.059432	0.3138
					0.041233	0.042869	0.239876
					0.050253	0.300083	0.048277
					0.040804	0.169527	0.20216
					0.04381	0.245523	0.267032
					0.042092	0.075021	0.396776
					0.059273	0.071124	0.274575
					0.054119	0.060406	0.060346
					0.11468	0.110095	0.656265
					0.085044	0.067226	0.239876
					0.045529	0.170502	0.085993
					0.219911	0.068201	0.248928
					0.660593	0.101327	0.279101
					0.046388	0.233831	0.144831
					0.107808	0.078918	0.176513
					0.054548	0.043843	0.165952
					0.974997	0.105224	0.066381
					0.065286	0.134453	0.099571
					0.200583	0.130556	0.043751
					0.041233	0.04774	0.098063
					0.57469	0.088661	0.064872
					0.073447	0.076969	0.13427
					0.149901	0.11107	0.039225
					0.43295	0.092558	0.21272
					0.109956	0.053586	0.039225
					1.22369	0.106198	0.132762
					0.518424	0.23578	0.176513
					0.356067	0.069175	0.040734
					0.063998	0.058458	0.108623
					0.099647	0.068201	0.061855
					0.050253	0.037998	0.451088
					0.423072	0.105289	0.390742
					0.051112	0.356448	0.203669
					0.352202	0.070193	0.057329
					0.061421	0.096515	0.181039
					0.067004	0.121741	0.070907
					0.081178	0.241288	0.04526
					0.8397	0.18974	0.138796
					0.047247	0.109676	0.321344
					0.205737	0.173289	0.143322
					0.292929	0.066903	0.53859
					0.087621	0.139289	0.096554
					0.051112	0.055935	0.454105
					0.040374	0.08116	0.119184
					0.127566	0.087741	0.076941
					0.04424	0.339997	0.057329
					0.138304	0.104193	0.114658
					0.063139	0.04058	0.066381
					0.050253	0.082257	0.10108
					0.074306	0.097612	0.061855
					0.094923	0.044967	0.102589
					0.184262	0.258836	0.215738
					0.045958	0.084451	0.048277
					0.043381	0.140386	0.04526
					0.121123	0.205095	0.39225
					0.321277	0.156837	0.048277
					0.16837	0.103096	0.125218
					0.041663	0.248965	0.096554
					0.460869	0.110773	0.119184
					0.094923	0.060322	0.079959
					0.554503	0.061419	0.064872
					0.61893	0.366319	0.066381
					0.165363	0.070193	0.111641
					1.29541	0.085548	0.20216
					0.104802	0.076773	0.102589
					0.048965	0.168902	0.092028
					0.054978	0.268707	0.277593
					0.042522	0.098709	0.039225
					0.891242	0.205095	0.040734
					0.611199	0.176579	0.405828
					0.048965	0.257739	0.042242
					0.077742	0.161224	0.168969
					0.040374	0.273094	0.049786
					0.542047	0.097612	0.105606
					0.656727	0.381674	0.137288
					0.159779	0.057032	0.322852
					0.101365	0.091031	0.052803
					0.609481	0.175482	0.102589
					0.287775	0.344384	0.037716
					0.525725	0.218256	0.603462
					0.752079	0.047161	0.064872
					0.082467	0.038387	0.511434
					0.080749	0.070193	0.239876
					0.225495	0.323545	0.043751
					0.187268	0.073483	0.081467
					0.156773	0.140386	0.20216
					0.060562	0.15245	0.242894
					0.057984	0.275288	0.168969
					0.05326	0.729348	0.043751
					0.148182	0.172192	0.348499
					0.228931	0.434318	0.081467
					0.336739	0.110773	0.108623
					0.095782	0.050451	0.239876
					0.095352	0.107483	0.076941
					0.091487	0.153547	0.215738
					0.552785	0.123934	0.057329
					0.086332	0.048258	0.170478
					0.210032	0.08116	0.054312
					0.123271	0.218256	0.061855
					0.036938	0.070193	0.270049
					0.093634	0.076773	0.152374
					0.05283	0.07458	0.159918
					0.089768	0.082257	0.046768
					0.482774	0.100902	0.22479
					0.070011	0.084451	0.230824
					0.168799	0.048258	0.199143
					0.051112	0.148063	0.057329
					0.740912	0.041677	0.084485
					0.455285	0.086644	0.20216
					0.20316	0.095418	0.184056
					0.128854	0.239094	0.295696
					0.127136	0.061419	0.188582
					0.055837	0.095418	0.170478
					0.103513	0.401415	0.039225
					0.159779	0.164515	0.286645
					0.118975	0.221546	0.182547
					0.077742	0.208385	0.144831
					0.167511	0.095418	0.058838
					0.065286	0.078967	0.24742
					0.16837	0.174385	0.176513
					0.051971	0.619671	0.110132
					0.050253	0.049354	0.079959
					0.255131	0.093225	0.089011
					0.174812	0.263223	0.328887
					0.095782	0.228127	0.110132
					0.183403	0.050451	0.39225
					0.04381	0.282965	0.048277
					0.057555	0.062516	0.126727
					0.597025	0.311481	0.197634
					0.052401	0.039483	0.345482
					0.038227	0.043871	0.176513
					0.057125	0.064709	0.182547
					0.121553	0.086644	0.039225
					0.042522	0.041677	0.221772
					0.161497	0.270901	0.171987
					0.3711	0.086644	0.230824
					0.207026	0.561543	0.058838
					0.200583	0.259933	0.039225
					0.270164	0.256643	0.238368
					0.084614	0.197417	0.267032
					0.100936	0.146966	0.615531
					0.240958	0.161224	0.075433
					0.074306	0.287352	0.048277
					0.070011	0.062516	0.043751
					0.051542	0.282965	0.039225
					0.146035	0.185353	0.161426
					0.465164	0.168902	0.039225
					0.118116	0.03729	0.058838
					0.056696	0.106386	0.049786
					0.137015	0.14587	0.093537
					0.332444	0.058128	0.209703
					0.078601	0.126128	0.196125
					0.161497	0.061419	0.597428
					0.04424	0.057032	0.102589
					0.346618	0.048258	0.422424
					0.055407	0.047161	0.251945
					0.128854	0.044967	0.043751
					0.078172	0.120644	0.052803
					0.105231	0.076773	0.423932
					0.065286	0.110773	0.167461
					0.237521	0.04058	0.200651
					0.423072	0.053741	0.288153
					0.251695	0.043871	0.164443
					0.05283	0.121741	0.120692
					0.313975	0.052645	0.058838
					0.063139	0.112967	0.120692
					0.037757	0.076773	0.371129
					0.098169	0.041677	0.159918
					0.075515	0.144773	0.203669
					0.099248	0.169998	0.051294
					0.072279	0.046064	0.092028
					0.040994	0.265417	0.043751
					0.057176	0.092128	0.07845
					0.065806	0.519866	0.194617
					0.121903	0.091031	0.306257
					0.050703	0.45406	0.079959
					0.161818	0.049354	0.129744
					0.080909	0.175482	0.049786
					0.049624	0.123934	0.12371
					0.053939	0.202901	0.351517
					0.069042	0.07458	0.066381
					0.072279	0.175482	0.104097
					0.050703	0.039483	0.155392
					0.094933	0.45077	0.075433
					0.037757	0.14916	0.039225
					0.055018	0.697541	0.199143
					0.097091	0.078967	0.203669
					0.069042	0.069096	0.107115
					0.072279	0.241288	0.040734
					0.059333	0.042774	0.082976
					0.039915	0.322448	0.061855
					0.091697	0.064709	0.072415
					0.055018	0.083354	0.04526
					0.324714	0.051548	0.374147
					0.157502	0.252256	0.107115
					0.134848	0.054838	0.1569
					0.097091	0.432125	0.063364
					0.111115	0.109676	0.064872
					0.077672	0.271997	0.082976
					0.081988	0.447479	0.098063
					0.057176	0.220449	0.114658
					0.097091	0.050451	0.125218
					0.199575	0.03729	0.1569
					0.627852	0.591155	0.064872
					0.343053	0.318061	0.05582
					1.43047	0.169998	0.111641
					0.181236	0.11516	0.413372
					0.180157	0.122838	0.164443
					0.057176	0.188643	0.093537
					0.101406	0.209482	0.111641
					0.083066	0.082257	0.069398
					0.058254	0.054838	0.1569
					0.103563	0.534124	0.120692
					0.077672	0.129418	0.040734
					0.045309	0.055935	0.057329
					1.58581	0.099805	0.093537
					0.158581	0.122838	0.089011
					0.421804	0.128321	0.064872
					0.062569	0.11516	0.250437
					0.087381	0.245675	0.105606
					0.163975	0.03729	0.129744
					0.281563	0.039483	0.214229
					0.049624	0.043871	0.669843
					0.046388	0.053741	0.060346
					0.144557	0.110773	0.167461
					1.1338	0.334513	0.107115
					0.110036	0.095418	0.052803
					0.053939	0.110773	0.238368
					1.92994	0.159031	0.119184
					0.385126	0.137095	0.046768
					0.112194	0.080064	0.175004
					0.241648	0.087741	0.082976
					0.100327	0.207288	0.116167
					0.138084	0.203998	0.129744
					0.085224	0.065806	0.039225
					0.042073	0.240191	0.05582
					0.084145	0.402512	0.200651
					0.050703	0.332319	0.108623
					0.047466	0.293933	0.140272
					0.102485	0.190837	0.112217
					0.156424	0.116257	0.092795
					0.099248	0.130515	0.127323
					0.104642	0.10858	0.110059
					0.063648	0.123934	0.228751
					0.133769	0.086644	0.343126
					0.043151	0.243481	0.086321
					0.293429	0.069096	0.217961
					0.069042	0.229224	0.049635
					0.059333	0.246772	0.066899
					0.237332	0.080064	0.16401
					0.059333	0.214966	0.038844
					0.475744	0.03729	0.138114
					0.145636	0.069096	0.211486
					0.040994	0.161224	0.319388
					0.038836	0.03729	0.168326
					0.090618	0.224836	0.053951
					0.751912	0.11845	0.094953
					0.048545	0.100902	0.250331
					0.073357	0.043871	0.138114
					0.059333	0.072386	0.071215
					0.402386	0.422254	0.094953
					0.482216	0.052645	0.047477
					0.135927	0.373996	0.082005
					0.048545	0.244578	0.049635
					0.271854	0.179869	0.073373
					0.05286	0.086644	0.308598
					0.23949	0.053741	0.159694
					0.073357	0.046064	0.041002
					0.259987	0.087741	0.168326
					0.867342	0.243481	0.138114
					0.090618	0.218256	0.047477
					0.049624	0.076773	0.062583
					0.35492	0.070193	0.161852
					0.309611	0.236901	0.254647
					0.171527	0.04058	0.120849
					0.63864	0.049354	0.101427
					0.401308	0.039483	0.144588
					0.77133	0.039483	0.30644
					0.051782	0.044967	0.084163
					0.070121	0.060322	0.189906
					0.348447	0.364125	0.494188
					0.075515	0.127225	0.192064
					0.277247	0.057032	0.075531
					0.039915	0.084451	0.250331
					0.193102	0.086644	0.038844
					0.317162	0.191934	0.101427
					0.070121	0.180966	0.133798
					0.194181	0.194127	0.114375
					0.210363	0.449673	0.211486
					0.244884	0.042774	0.049635
					0.048545	0.038387	0.075531
					0.049624	1.14612	0.082005
					0.076594	0.059225	0.230909
					1.10252	0.041677	0.092795
					0.037757	0.210579	0.282701
					0.085224	0.050451	0.049635
					0.469271	0.105289	0.038844
					0.659137	0.060322	0.069057
					0.298823	0.042774	0.049635
[truncated: 6,440 more rows]
